# Supplementary material for: Copy number variation alters local and global mutational tolerance
Source: HighWire-hosted journal article supplement (doi:10.1101/gr.277625.122), 2023-08-01
Supplement: Supplemental_File_S2.zip [file SCode1_Code_File_Descriptions.docx]

This Supplemental materials file contains code used in the analysis and figure construction of “Copy number variation alters local and global mutational tolerance”.

Supplemental code and (where necessary additional data objects required for the analysis) have been provided, separated into thematic folders based on the experiment, analysis, and project:

SCode1_

**SCode2_Growth_rate_analysis**

Files associated with the calculation of growth rates in YPGal, YPGal + CCCP and Glutamine limited media. Code for the generation of Figures 1B,C; 3D,E; and Supplemental Figures S3, S15B, S26

**SCode3_RNAseq_analysis**

Files associated with RNAseq analysis, including the replicate correlation, copy-number correction, DESeq2, and the GSEA. Code for the generation of Figure 4; and Supplemental Figures S4, S15A, S16, S17, S18, S25

**SCode4_Hermes_analysis**

Files associated with the analysis of HERMES data, including the conversion from alignments to unique insertion sites, replicate correlation, copy-number correction, and DESeq2. Code for the generation of Figure 2B; 3A,C; and Supplemental Figures S6, S7, S8, S9, S10, S11, S12, S13

**SCode5_Tn_to_GSEA**

Files associated with the GSEA of HERMES data, including DESeq2, heatmap plots, GSE and GSEA GO term compression. Code for the generation of Figure 3B and Supplemental Figures S14

**SCode6_Compare_to_Prev**

Files associated with comparison of gene set expression data between this study and previous studies. Code for the generation of Figure 5 and Supplemental Figures S19, S20, S21, S22, S23, S24

**SCode7_Miscellaneous_analysis**

Files not associated with any single or substantial aspect of analysis, including downstream TF analysis, ncRNA enrichment, and zscore calculation. No association with any figures.

**Figure source data and code used in analysis**

**Figure 1A**

Data from: 10.1128/mra.00729-22

**Figure 1B**

Data from: 10.1371/journal.pbio.3000069

“Fitness_Final_Lauer2018.csv” from: journal.pbio.3000069.s009

Analyzed by:

SCode2_Growth_rate_anaylsis/Growth_rate_summary.rmd

Section “Figure 1B”

**Figure 1C**

Raw Data:

SCode2_Growth_rate_anaylsis/growth_curves/

Analyzed by:

SCode2_Growth_rate_anaylsis/Growth_rate_summary.rmd

Section “Figure 1C”

**Figure 2B**

Normalized insertions per gene from Supplemental_Table_S9

Analyzed by:

SCode4_Hermes_analysis/Make_Fig2B.py

**Figure 3A**

Normalized strain insertion data from: Supplemental_Table_S9

Analyzed by:
 SCode4_Hermes_analysis/Make_Fig3A.rmd

**Figure 3B**

Normalized strain insertion data from: Supplemental_Table_S9

**All data is located in SF5_Tn_to_GSEA/**

Analyzed by:

SCode5_Tn_to_GSEA/make_gse.r

SCode5_Tn_to_GSEA/make_compressed.py

SCode5_Tn_to_GSEA/make_insert_GSEA.py

**Figure 3C**

Normalized strain insertion data from: Supplemental_Table_S9

Analyzed by:
 SCode4_Hermes_analysis/Make_Fig3C.rmd

**Figure 3D**

Raw Data:

SCode2_Growth_rate_anaylsis/growth_curves/

Analyzed by:

SCode2_Growth_rate_anaylsis/functions.r

SCode2_Growth_rate_anaylsis/Growth_rate_summary.rmd

Section “Figure 3D”

**Figure 3E**

Raw Data:

SCode2_Growth_rate_anaylsis/growth_curves/

Analyzed by:

SCode2_Growth_rate_anaylsis/functions.r

SCode2_Growth_rate_anaylsis/Growth_rate_summary.rmd

Section “Figure 3E”

SCode2_Growth_rate_anaylsis/error_bars/error_bars_*_mult.py

**Figure 4**

Normalized expression data from: Supplemental_Table_S23

Analyzed by:

SCode3_RNAseq_analysis/ Make_Fig4.py

**Figure 5**

All previously published data is located in SF6_Compare_to_Prev**/**
 Analyzed by:

SCode6_Compare_to_Prev/Compare_to_Previous_Studies.rmd

**Supplemental_Fig_S1**

Based on previously published data: 10.1128/mra.00729-22

**Supplemental_Fig_S2**

Based on previously published data: 10.1128/mra.00729-22

**Supplemental_Fig_S3**

Copy-number sizes from Supplemental_Table_S4

Relative fitness in glutamine limited media from:

“Fitness_Final_Lauer2018.csv” from: journal.pbio.3000069.s009

Relative growth rate (YPGal) from

rel_growth_YPGal.csv from

Analyzed by:

SCode2_Growth_rate_anaylsis/Growth_rate_summary.rmd

**Supplemental_Fig_S4**

Copy-number sizes from Supplemental_Table_S4

TPM data from Supplemental_Table_S28

DESeq2 data from Supplemental_Table_S23, Supplemental_Table_S24

Analyzed by:

SCode3_RNAseq_analysis/Make_Supplemental_Core_Figure.py

**Supplemental_Fig_S6**

CDS lengths for each gene derived from SGD peptide sequences.
Insertion medians calculated from Supplemental_Table_9

Analyzed by:

SCode4_Hermes_analysis/Make_Supplemental_Fig_S6.r

**Supplemental_Fig_S7**

Strain insertion data from: Supplemental_Table_S8

Analyzed by:

SCode4_Hermes_analysis/Make_Supplemental_Fig_S7.py

**Supplemental_Fig_S8**

Essential ORFs from Winzeler 1999

Normalized strain insertion data from: Supplemental_Table_S9

Analyzed by:

SCode4_Hermes_analysis/Make_Supplemental_Fig_S8.py

**Supplemental_Fig_S9**

Essential ORFs from Winzeler 1999

Quartile essential ORFs from Costanzo et al 2021

Strain insertion data from: Supplemental_Table_S8

Analyzed by:

SCode4_Hermes_analysis/Make_ Supplemental_Fig_S9.Rmd

**Supplemental_Fig_S10**

Normalized strain insertion data from: Supplemental_Table_S9

Analyzed by:

SCode4_Hermes_analysis/Make_ Supplemental_Fig_S10.Rmd

**Supplemental_Fig_S11**

Normalized strain insertion data from: Supplemental_Table_S9

Analyzed by:

SCode4_Hermes_analysis/Supplemental_Fig_S11_Make_Insert_R-squared.r

SCode4_Hermes_analysis/Make_Supplemental_Fig_S11.py

SCode4_Hermes_analysis/Supplemental_Fig_S11_Enrichment_of_outliers.py

**Supplemental_Fig_S12**

Normalized strain insertion data from: Supplemental_Table_S9

Analyzed by:

SCode4_Hermes_analysis/Make_Supplemental_Fig_S12.py

**Supplemental_Fig_S13**

Copy number per gene from Supplemental_Table_S6

Normalized strain insertion data from: Supplemental_Table_S9

Analyzed by:

SCode4_Hermes_analysis/Make_Supplemental_Fig_S13.r

**Supplemental_Fig_S14**

Normalized strain insertion data from: Supplemental_Table_S9

All data is located in SF5_Tn_to_GSEA/

Analyzed by:

SCode5_Tn_to_GSEA/make_gse.r

SCode5_Tn_to_GSEA/make_compressed.py

SCode5_Tn_to_GSEA/make_insert_GSEA.py

**Supplemental_Fig_S15A**

RNA read abundance from: Supplemental_Table_S21
 Analyzed by:

SCode3_RNAseq_analysis/Make_Supplemental_Fig_S15.rmd

**Supplemental_Fig_S15B**

Raw Data:

SCode2_Growth_rate_anaylsis/growth_curves/

Analyzed by:

SCode2_Growth_rate_anaylsis/functions.r

SCode2_Growth_rate_anaylsis/Growth_rate_summary.rmd

Section “Figure 3E”

SCode2_Growth_rate_anaylsis/error_bars/error_bars_*_additive.py

**Supplemental_Fig_S16**

RNA read abundance from: Supplemental_Table_S21
 Analyzed by:

SCode3_RNAseq_analysis/Make_Supplemental_Fig_S16.rmd

**Supplemental_Fig_S17**

RNA read abundance from: Supplemental_Table_S21

Normalized strain insertion data from: Supplemental_Table_S9
 Analyzed by:

SCode3_RNAseq_analysis/Make_Supplemental_Fig_S17.r

**Supplemental_Fig_S18**

TPM normalized RNA from Supplemental_Table_S22

Copy number per gene from Supplemental_Table_S6
 Analyzed by:

SCode3_RNAseq_analysis/Make_Supplemental_Fig_S18.r

**Supplemental_Fig_S19, Supplemental_Fig_S20, Supplemental_Fig_S21, Supplemental_Fig_S22, Supplemental_Fig_S23, Supplemental_Fig_S24**

All previously published data is located in SF6_Compare_to_Prev /
 Analyzed by:

SCode6_Compare_to_Prev/Compare_to_Previous_Studies.rmd

**Supplemental_Fig_S25**

Using DESeq2 data from SCode3_RNAseq_analysis/Supplemental_File_DESeq_for_GSEA/

Analyzed by:

SCode3_RNAseq_analysis/make_gse_for_rna.r

**Supplemental_Fig_S26**

Raw Data:

SCode2_Growth_rate_anaylsis/growth_curves/

Analyzed by:

SCode2_Growth_rate_anaylsis/functions.r

SCode2_Growth_rate_anaylsis/Growth_rate_summary.rmd

Section “Effect of CCCP”
