# Supplementary material for: Copy number variation alters local and global mutational tolerance
Source: HighWire-hosted journal article supplement (doi:10.1101/gr.277625.122), 2023-08-01
Supplement: Supplemental_File_S2.zip [file Supplemental_TF_targets.xlsx]

## Sheet: Table_A
	CNV_strains	DE_sig	jaccard	CNV_DE_sig_targets	CNV_DE_not_sig_targets	CNN_DE_sig_targets	CNN_DE_not_sig_targets	FET_statistic	pvalue
DAL80	Aneu, ComSup, Trip2, ComQuad, Sup, Trip1, ComTrip	ComSup, Trip2, Sup	0.428571	3	104	0	0	nan	1	3	7
BAS1	Aneu, ComSup, Sup	ComSup, ComQuad, Trip2, Aneu, Sup	0.6	37	320	126	371	0.340451	2.00005e-08	3	3
PUT3	Aneu, ComSup,	Aneu	0.5	17	100	50	232	0.7888	0.466199	1	2
IXR1	Aneu	Trip2, Trip1, Sup, Aneu	0.25	78	681	281	4093	1.66833	0.00026939	1	1
RGT1	Aneu	Aneu	1	1	11	6	60	0.909091	1	1	1
MSN4	Aneu	Trip1, ComQuad	0	32	151	148	893	1.27868	0.257987	0	1
HAP4	Aneu	ComSup, Trip1, Aneu, Trip2	0.25	4	46	71	220	0.269443	0.00896839	1	1
ABF1	Aneu	Trip1, Sup, Aneu	0.333333	46	286	222	1758	1.27367	0.165152	1	1
ASH1	Aneu	Trip2, ComQuad	0	11	58	39	366	1.77984	0.135664	0	1
										11	18	0.611111

## Sheet: Table_B
	CNV_strains	DE_sig	jaccard	CNV_DE_sig_targets	CNV_DE_not_sig_targets	CNN_DE_sig_targets	CNN_DE_not_sig_targets	FET_statistic	pvalue
DAL80	Aneu, ComSup, Trip2, ComQuad, Sup, Trip1, ComTrip	ComSup, Trip2, Sup	0.428571	1	43	2	61	0.709302	1
BAS1	Aneu, ComSup, Sup	ComSup, ComQuad, Trip2, Aneu, Sup	0.6	99	502	64	189	0.582389	0.00409669
PUT3	Aneu, ComSup,	Aneu	0.5	13	45	54	287	1.53539	0.252885
IXR1	Aneu	Trip2, Trip1, Sup, Aneu	0.25	264	2621	95	2153	2.28274	2.36426e-12
RGT1	Aneu	Aneu	1	1	11	6	60	0.909091	1
MSN4	Aneu	Trip1, ComQuad	0	74	270	106	774	2.00126	4.8286e-05
HAP4	Aneu	ComSup, Trip1, Aneu, Trip2	0.25	38	161	37	105	0.6698	0.144982
ABF1	Aneu	Trip1, Sup, Aneu	0.333333	138	837	130	1207	1.5308	0.00123771
ASH1	Aneu	Trip2, ComQuad	0	17	119	33	305	1.32035	0.409431

## Sheet: Sheet3
'DGY1657'	239.437			'DGY1657'	239.437	1
'DGY1728'	339.394	1.41747	0.708734	'DGY1728'	169.697	2	0.708734
'DGY1734'	587.723	2.45461	0.613652	'DGY1734'	146.931	4
'DGY1736'	450.754	1.88256	0.627519	'DGY1736'	150.251	3
'DGY1740'	530.488	2.21557	0.553892	'DGY1740'	132.622	4
'DGY1744'	816.227	3.40894	1.13631	'DGY1744'	272.076	3
'DGY1747'	329.723	1.37708	0.459026	'DGY1747'	109.908	3
'DGY1751'	556.483	2.32413	0.774711	'DGY1751'	185.494	3
