# Supplementary material for: Copy number variation alters local and global mutational tolerance
Source: HighWire-hosted journal article supplement (doi:10.1101/gr.277625.122), 2023-08-01
Supplement: Supplemental_Tables.zip [file Supplemental_Table_S2.xlsx]

## Sheet: Supplemental_Table_S2
# Evaluation of 19 single nucleotide variants identified in the CNV containing strains. Table contains each SNV identified in the evolved strains and not inherited from the ancestor. Details include locus, gene or nearest-neighbor gene potentially affected, and potential mutation effect.
Gresham Lab Name	Strain name new	SNV_name	Chromo	start	Ref	Var	type	locus	severity	DESEQ_insertions_log2_FC_relative_to_Eu	DESEQ_insertions_padj	DESEQ_mRNA_log2_FC_relative_to_Eu	DESEQ_mRNA_padj
DGY1728	Aneu	YNL284C-B	XIV	101688	A	G	missense variant	Gag Protein	low	1.06335	0.999774	0.797872	0.0375271
DGY1728	Aneu	YPL232W	XVI	108099	AGTCGTTGTTGTT	A	disruptive inframe deletion	SSO1	high	0.40203	0.999774	0.656806	0.118874
DGY1734	ComSup	YHL002W	VIII	103761	G	A	missense variant	HSE1	low SIFT:0.87	-0.141982	0.999757	-0.0205369	0.997602
DGY1734	ComSup	ChrXIV:96555	XIV	96555	A	G	non-coding	proximal to transposable element, YNL285W	low	na	na	na	na
DGY1734	ComSup	ChrXIV:96603	XIV	96603	CTGTGTT	C	non-coding	proximal to transposable element, YNL285W	low	na	na	na	na
DGY1747	Trip1	YMR129W	XIII	530340	C	T	missense_variant	POM152	high SIFT:0	-0.0780398	0.99904	0.125395	0.912633
DGY1747	Trip1	ChrV:431779	V	431779	C	T	non-coding	intergenic_variant inside snR52	low	na	na	na	na
DGY1747	Trip1	ChrXII:915075	XII	915075	C	CGT	non-coding	proximal to CDS YLR397C	low	0.201118	0.99904	0.427246	0.620364
DGY1747	Trip1	ChrXII:915075	XII	915075	C	CGT	non-coding	proximal to CDS YLR398C	low	na	na	-0.0587634	0.961285
DGY1751	ComTrip	YOL104C	XV	118037	C	A	non-coding	proximal to CDS YOL104C	low	1.21219	0.999257	1.05123	0.382157
DGY1751	ComTrip	YNR031C	XIV	680764	C	T	stop gained	SSK2	high	-0.460219	0.999257	0.137988	0.99885
DGY1736	Trip2	YJR152W	X	721282	CAGATACACTTTATGAAATAGTGGTG	C	stop lost & splice region variant & conservative inframe deletion	DAL5	high	0.659971	0.999806	0.253898	0.87105
DGY1736	Trip2	ChrV:551803	V	551803	T	TGTTGGAATAGAAATCAACTATCATCTACTAAC	non-coding	proximal to CDS YER181C	low	na	na	na	na
DGY1736	Trip2	ChrX:524178	X	524178	A	AGAAATGGGTGAATGTTGAGATAATTGTTG	non-coding	tS(AGA)J	low	na	na	na	na
DGY1736	Trip2	ChrX:745685	X	745685	GGGTGTGGGT	G	non-coding	TEL10R	low	na	na	na	na
DGY1744	Sup	YMR171C	XIII	604754	T	G	missense variant	EAR1	low SIFT:0.74	na	na	0.213573	0.706506
DGY1744	Sup	YJL128C	X	179034	A	G	missense variant	PBS2	high SIFT:0	0.0762028	0.997015	0.134718	0.853374
DGY1744	Sup	ChrXV:594618	XV	594618	G	GTGTTGGAATAGAAATCAACTATCATCTACT	non-coding	tG(CCC)O	low	na	na	na	na
DGY1740	ComQuad	YOL077C	XV	185936	C	T	missense_variant	BRX1	low SIFT:0.21	0.225066	0.999929	0.335792	0.519839
DGY1740	ComQuad	YNL338W	XIV	6616	TACCCACACCCACACCCACACACCACACCCACACACCCACACCACACCCACACCCAC	T	frameshift_variant in a Dubious ORF	YNL338W	low	na	na	na	na
High severity SNVs
Gresham Lab Name	Strain name new	SNV_name	type	Gene	Gene description	Gene ontology associations	Gene associated pathway	Gene interactions
DGY1728	Aneu	YPL232W	disruptive inframe deletion	SSO1		nitrogen compound transport [GO:0071705]		SLT2 / YHR030C
DGY1747	Trip1	YMR129W	missense_variant	POM152		nitrogen compound transport [GO:0071705]
DGY1751	ComTrip	YNR031C	stop gained	SSK2		nitrogen compound transport [GO:0071705]; osmosensory signaling MAPK cascade [GO:0000161]	HOG pathway	CYT1 / YOR065W; SLT2 / YHR030C
DGY1736	Trip2	YJR152W	stop lost & splice region variant & conservative inframe deletion	DAL5		nitrogen compound transport [GO:0071705]		CYT1 / YOR065W; SLT2 / YHR030C
DGY1744	Sup	YJL128C	missense variant	PBS2		osmosensory signaling MAPK cascade [GO:0000161]	HOG pathway	CYT1 / YOR065W; SLT2 / YHR030C
