# Supplementary material for: Copy number variation alters local and global mutational tolerance
Source: HighWire-hosted journal article supplement (doi:10.1101/gr.277625.122), 2023-08-01
Supplement: Supplemental_Tables.zip [file Supplemental_Table_S6.xlsx]

## Sheet: gene_median_relative_depth_DNA
#Median Relative Sequence Depth per Gene, CNV, and Gene Copy Number This table contains the median long-read sequencing depth per gene relative to the genome depth, which is then resolved to copy number using structural breakpoint information.
Gene	DGY1657	rel_DGY1728	rel_DGY1728_cor	rel_DGY1734	rel_DGY1734_cor	rel_DGY1747	rel_DGY1747_cor	rel_DGY1751	rel_DGY1751_cor	rel_DGY1736	rel_DGY1736_cor	rel_DGY1744	rel_DGY1744_col	rel_DGY1740	rel_DGY1740_cor	Notes
KanMX	1.08163	2	2	4	4	2	3	3	3	3	3	3	3	3	4	KanMX
mCitrine	1.18367	2	2	3	4	3	3	3	3	3	3	3	3	4	4	mCitrine
YAL001C	1.10204	1	1	1	1	1	1	1	1	1	1	1	1	1	1
YAL002W	1.20408	1	1	1	1	1	1	1	1	1	1	1	1	1	1
YAL003W	1.22449	1	1	1	1	1	1	1	1	1	1	1	1	1	1
YAL005C	1.28571	1	1	1	1	1	1	1	1	1	1	1	1	1	1
YAL007C	1.28571	1	1	1	1	1	1	1	1	1	1	1	1	1	1
YAL008W	1.30612	1	1	1	1	1	1	1	1	1	1	1	1	1	1
YAL009W	1.30612	1	1	1	1	1	1	1	1	1	1	1	1	1	1
YAL010C	1.30612	1	1	1	1	1	1	1	1	1	1	1	1	1	1
YAL011W	1.20408	1	1	1	1	1	1	1	1	1	1	1	1	1	1
YAL012W	1.16327	1	1	1	1	1	1	1	1	1	1	1	1	1	1
YAL013W	1.12245	1	1	1	1	1	1	1	1	2	1	1	1	1	1
YAL014C	1.16327	1	1	1	1	1	1	1	1	1	1	1	1	1	1
YAL015C	1.18367	1	1	1	1	1	1	1	1	2	1	1	1	2	1
YAL016W	1.14286	1	1	1	1	1	1	1	1	1	1	1	1	2	1
YAL017W	1.16327	1	1	1	1	1	1	1	1	1	1	1	1	2	1
YAL018C	1.16327	1	1	1	1	1	1	1	1	1	1	1	1	2	1
YAL019W	1.18367	1	1	1	1	1	1	1	1	1	1	1	1	1	1
YAL020C	1.16327	1	1	1	1	1	1	1	1	1	1	1	1	1	1
YAL021C	1.10204	1	1	1	1	1	1	1	1	1	1	1	1	1	1
YAL022C	1.20408	1	1	1	1	1	1	1	1	1	1	1	1	2	1
YAL023C	1.2449	1	1	1	1	1	1	1	1	1	1	1	1	1	1
YAL024C	1.20408	1	1	1	1	1	1	1	1	1	1	1	1	1	1
YAL025C	1.22449	1	1	1	1	1	1	1	1	1	1	1	1	1	1
YAL026C	1.22449	1	1	1	1	1	1	1	1	1	1	1	1	1	1
YAL027W	1.20408	1	1	1	1	1	1	1	1	1	1	1	1	1	1
YAL028W	1.16327	1	1	1	1	1	1	1	1	1	1	1	1	1	1
YAL029C	1.16327	1	1	1	1	1	1	1	1	1	1	1	1	2	1
YAL030W	1.06122	1	1	1	1	1	1	1	1	1	1	1	1	1	1
YAL031C	1.02041	1	1	1	1	1	1	1	1	1	1	1	1	1	1
YAL032C	1	1	1	1	1	1	1	1	1	1	1	1	1	1	1
YAL033W	0.95918	1	1	1	1	1	1	1	1	1	1	1	1	1	1
YAL034C	1.02041	1	1	1	1	1	1	1	1	1	1	1	1	1	1
YAL034W-A	1.04082	1	1	1	1	1	1	1	1	1	1	1	1	1	1
YAL035W	1	1	1	1	1	1	1	1	1	1	1	1	1	1	1
YAL036C	0.95918	1	1	1	1	1	1	1	1	1	1	1	1	1	1
YAL037C-A	0.93878	1	1	1	1	1	1	1	1	1	1	1	1	2	1
YAL037W	0.93878	1	1	1	1	1	1	1	1	1	1	1	1	2	1
YAL038W	0.91837	1	1	1	1	1	1	1	1	1	1	1	1	1	1
YAL039C	0.87755	1	1	1	1	1	1	1	1	1	1	1	1	1	1
YAL040C	0.89796	1	1	1	1	1	1	1	1	1	1	1	1	1	1
YAL041W	0.95918	1	1	1	1	1	1	1	1	1	1	1	1	1	1
YAL042W	0.91837	1	1	1	1	1	1	1	1	1	1	1	1	1	1
YAL043C	0.85714	1	1	1	1	1	1	1	1	1	1	1	1	1	1
YAL044C	0.85714	1	1	1	1	1	1	1	1	1	1	1	1	1	1
YAL044W-A	0.83673	1	1	1	1	1	1	1	1	1	1	1	1	1	1
YAL046C	0.87755	1	1	1	1	1	1	1	1	1	1	1	1	1	1
YAL047C	0.83673	1	1	1	1	1	1	1	1	1	1	1	1	1	1
YAL048C	0.7551	1	1	1	1	1	1	1	1	1	1	1	1	1	1
YAL049C	0.73469	1	1	1	1	1	1	1	1	1	1	1	1	1	1
YAL051W	0.71429	1	1	1	1	1	1	1	1	1	1	1	1	1	1
YAL053W	0.77551	1	1	1	1	1	1	1	1	1	1	1	1	1	1
YAL054C	0.7551	1	1	1	1	1	1	1	1	1	1	1	1	1	1
YAL055W	0.77551	1	1	2	1	1	1	1	1	1	1	1	1	1	1
YAL056W	0.71429	1	1	1	1	1	1	1	1	1	1	1	1	1	1
YAL058W	0.67347	1	1	1	1	1	1	1	1	1	1	1	1	1	1
YAL059W	0.69388	1	1	1	1	1	1	1	1	1	1	1	1	1	1
YAL060W	0.73469	1	1	1	1	1	1	1	1	1	1	1	1	1	1
YAL061W	0.79592	1	1	1	1	1	1	1	1	1	1	1	1	1	1
YAL062W	0.81633	1	1	1	1	1	1	1	1	1	1	1	1	1	1
YAL063C	0.87755	1	1	1	1	1	1	1	1	1	1	1	1	1	1
YAL063C-A	0.79592	1	1	1	1	1	1	1	1	1	1	1	1	1	1
YAL064C-A	0.79592	1	1	1	1	1	1	1	1	1	1	1	1	1	1
YAL064W	0.79592	1	1	1	1	1	1	1	1	1	1	1	1	1	1
YAL064W-B	0.79592	1	1	1	1	1	1	1	1	2	1	1	1	1	1
YAL065C	0.79592	1	1	1	1	1	1	2	1	1	1	1	1	1	1	TEL01L
YAL067C	0.87755	1	1	2	1	1	1	2	1	2	1	1	1	1	1	TEL01L
YAL067W-A	0.87755	1	1	2	1	1	1	2	1	2	1	1	1	1	1	TEL01L
YAL068C	0.87755	1	1	2	1	1	1	2	1	3	1	1	1	1	1	TEL01L
YAR002C-A	1.18367	1	1	1	1	1	1	1	1	1	1	1	1	1	1
YAR002W	1.18367	1	1	1	1	1	1	1	1	1	1	1	1	1	1
YAR003W	1.14286	1	1	1	1	1	1	1	1	1	1	1	1	1	1
YAR007C	1.12245	1	1	1	1	1	1	1	1	1	1	1	1	1	1
YAR008W	1.08163	1	1	1	1	1	1	1	1	2	1	1	1	1	1
YAR009C	1.73469	1	1	2	1	1.5	1	2.5	1	3	1	1.5	1	1.5	1	ty
YAR010C	1.7551	0.5	1	2	1	1.5	1	3	1	3	1	1.5	1	1.5	1	ty
YAR014C	0.87755	1	1	1	1	1	1	1	1	2	1	1	1	1	1
YAR015W	0.81633	1	1	1	1	1	1	1	1	1	1	1	1	1	1
YAR018C	0.77551	1	1	1	1	1	1	1	1	1	1	1	1	1	1
YAR019C	0.77551	1	1	1	1	1	1	1	1	1	1	1	1	1	1
YAR020C	0.69388	1	1	1	1	1	1	1	1	1	1	1	1	1	1
YAR023C	0.73469	1	1	1	1	1	1	1	1	1	1	1	1	1	1
YAR027W	0.67347	1	1	1	1	1	1	1	1	1	1	1	1	1	1
YAR028W	0.71429	1	1	1	1	1	1	1	1	1	1	1	1	1	1
YAR029W	0.71429	1	1	1	1	1	1	1	1	1	1	1	1	1	1
YAR031W	0.79592	1	1	1	1	1	1	1	1	1	1	1	1	1	1
YAR033W	0.85714	1	1	1	1	1	1	1	1	1	1	1	1	1	1
YAR035C-A	0.89796	1	1	1	1	1	1	1	1	1	1	1	1	1	1
YAR035W	0.87755	1	1	1	1	1	1	1	1	1	1	1	1	1	1
YAR042W	0.93878	1	1	1	1	1	1	1	1	2	1	1	1	1	1
YAR050W	0.97959	1	1	1	1	1	1	1	1	2	1	1	1	1	1
YAR061W	1.12245	1	1	1	1	1	1	2	1	2	1	1	1	2	1	TEL01R
YAR064W	1.12245	1	1	1	1	1	1	2	1	2	1	1	1	2	1	TEL01R
YAR066W	1.10204	1	1	1	1	1	1	2	1	2	1	1	1	1	1	TEL01R
YAR068W	1.10204	1	1	2	1	1	1	2	1	2	1	1	1	1	1	TEL01R
YAR071W	1	1	1	2	1	1	1	2	1	2	1	1	1	1	1	TEL01R
YBL001C	1.02041	1	1	1	1	2	1	1	1	1	1	1	1	1	1
YBL002W	0.97959	1	1	1	1	2	1	1	1	1	1	1	1	1	1
YBL003C	0.97959	1	1	1	1	2	1	1	1	1	1	1	1	1	1
YBL004W	0.97959	1	1	1	1	2	1	1	1	1	1	1	1	1	1
YBL005W	1.02041	1	1	1	1	2	1	1	1	1	1	1	1	1	1
YBL005W-A	0.95918	2	1	1	1	2	1	2	1	1	1	1	1	1	1	ty
YBL005W-B	1.10204	2	1	2	1	2	1	3	1	2	1	1	1	2	1	ty
YBL006C	1.12245	1	1	1	1	2	1	1	1	1	1	1	1	1	1
YBL007C	1.14286	1	1	1	1	2	1	1	1	1	1	1	1	1	1
YBL008W	1.02041	1	1	1	1	2	1	1	1	1	1	1	1	1	1
YBL008W-A	1.02041	1	1	1	1	2	1	1	1	1	1	1	1	1	1
YBL009W	0.97959	1	1	1	1	2	1	1	1	1	1	1	1	1	1
YBL010C	0.93878	1	1	1	1	1	1	1	1	1	1	1	1	1	1
YBL011W	0.93878	1	1	1	1	1	1	1	1	1	1	1	1	1	1
YBL013W	0.97959	1	1	1	1	1	1	1	1	1	1	1	1	1	1
YBL014C	1.02041	1	1	1	1	1	1	1	1	1	1	1	1	1	1
YBL015W	1.08163	1	1	1	1	1	1	1	1	1	1	1	1	1	1
YBL016W	1.10204	1	1	1	1	1	1	1	1	1	1	1	1	1	1
YBL017C	1.10204	1	1	1	1	1	1	1	1	1	1	1	1	1	1
YBL018C	1.14286	1	1	1	1	1	1	1	1	1	1	1	1	1	1
YBL019W	1.08163	1	1	1	1	1	1	1	1	1	1	1	1	1	1
YBL020W	1.04082	1	1	1	1	1	1	1	1	1	1	1	1	1	1
YBL021C	1.04082	1	1	1	1	1	1	1	1	1	1	1	1	1	1
YBL022C	0.93878	1	1	1	1	1	1	1	1	1	1	1	1	1	1
YBL023C	0.91837	1	1	1	1	1	1	1	1	1	1	1	1	1	1
YBL024W	0.91837	1	1	1	1	1	1	1	1	1	1	1	1	1	1
YBL025W	1	1	1	1	1	1	1	1	1	1	1	1	1	1	1
YBL026W	0.93878	1	1	1	1	1	1	1	1	1	1	1	1	1	1
YBL027W	0.85714	1	1	1	1	1	1	1	1	1	1	1	1	1	1
YBL028C	0.81633	1	1	1	1	1	1	1	1	1	1	1	1	1	1
YBL029C-A	0.81633	1	1	1	1	1	1	1	1	1	1	1	1	1	1
YBL029W	0.83673	1	1	1	1	1	1	1	1	1	1	1	1	1	1
YBL030C	0.7551	1	1	1	1	1	1	1	1	1	1	1	1	1	1
YBL031W	0.71429	1	1	1	1	1	1	1	1	1	1	1	1	1	1
YBL032W	0.67347	1	1	1	1	1	1	1	1	1	1	1	1	1	1
YBL033C	0.69388	1	1	1	1	1	1	1	1	1	1	1	1	1	1
YBL034C	0.77551	1	1	1	1	1	1	1	1	1	1	1	1	1	1
YBL035C	0.81633	1	1	1	1	1	1	1	1	1	1	1	1	1	1
YBL036C	0.77551	1	1	1	1	1	1	1	1	2	1	1	1	1	1
YBL037W	0.85714	1	1	1	1	1	1	1	1	2	1	1	1	1	1
YBL038W	0.93878	1	1	1	1	1	1	1	1	1	1	1	1	1	1
YBL039C	1	1	1	1	1	1	1	1	1	1	1	1	1	1	1
YBL039W-B	1.02041	1	1	1	1	1	1	1	1	1	1	1	1	1	1
YBL040C	0.97959	1	1	1	1	1	1	1	1	2	1	1	1	1	1
YBL041W	0.95918	1	1	1	1	1	1	1	1	2	1	1	1	1	1
YBL042C	0.97959	1	1	1	1	1	1	1	1	1	1	1	1	1	1
YBL043W	1.08163	1	1	1	1	1	1	1	1	2	1	1	1	1	1
YBL044W	1.06122	1	1	1	1	1	1	1	1	1	1	1	1	1	1
YBL045C	1.08163	1	1	1	1	1	1	1	1	2	1	1	1	1	1
YBL046W	1.10204	1	1	1	1	1	1	1	1	1	1	1	1	1	1
YBL047C	1.10204	1	1	1	1	1	1	1	1	1	1	1	1	1	1
YBL049W	1.10204	1	1	1	1	1	1	1	1	1	1	1	1	1	1
YBL050W	1.06122	1	1	1	1	1	1	1	1	1	1	1	1	1	1
YBL051C	1.10204	1	1	1	1	1	1	1	1	1	1	1	1	1	1
YBL052C	1.10204	1	1	1	1	1	1	1	1	1	1	1	1	1	1
YBL054W	1.06122	1	1	1	1	1	1	1	1	1	1	1	1	1	1
YBL055C	1.14286	1	1	1	1	1	1	1	1	1	1	1	1	1	1
YBL056W	1.18367	1	1	1	1	1	1	1	1	1	1	1	1	1	1
YBL057C	1.22449	1	1	1	1	1	1	1	1	1	1	1	1	1	1
YBL058W	1.18367	1	1	1	1	1	1	1	1	1	1	1	1	1	1
YBL059C-A	1.12245	1	1	1	1	1	1	1	1	2	1	1	1	1	1
YBL059W	1.16327	1	1	1	1	1	1	1	1	2	1	1	1	1	1
YBL060W	1.14286	1	1	1	1	1	1	1	1	1	1	1	1	1	1
YBL061C	1	1	1	1	1	1	1	1	1	1	1	1	1	1	1
YBL063W	1.06122	1	1	1	1	1	1	1	1	1	1	1	1	1	1
YBL064C	1.08163	1	1	1	1	1	1	1	1	1	1	1	1	1	1
YBL066C	1.04082	1	1	1	1	1	1	1	1	1	1	1	1	1	1
YBL067C	1.08163	1	1	1	1	1	1	1	1	1	1	1	1	1	1
YBL068W	0.97959	1	1	1	1	1	1	1	1	1	1	1	1	1	1
YBL069W	1	1	1	1	1	1	1	1	1	2	1	1	1	1	1
YBL071C-B	0.95918	1	1	1	1	1	1	1	1	1	1	1	1	1	1
YBL071W-A	1	1	1	1	1	1	1	1	1	1	1	1	1	1	1
YBL072C	0.95918	1	1	1	1	1	1	1	1	1	1	1	1	1	1
YBL074C	1.06122	1	1	1	1	1	1	1	1	1	1	1	1	1	1
YBL075C	1.02041	1	1	1	1	1	1	1	1	1	1	1	1	1	1
YBL076C	0.95918	1	1	1	1	1	1	1	1	1	1	1	1	1	1
YBL078C	0.93878	1	1	1	1	1	1	1	1	2	1	1	1	1	1
YBL079W	0.85714	1	1	2	1	1	1	1	1	1	1	1	1	1	1
YBL080C	0.87755	1	1	2	1	1	1	1	1	1	1	1	1	1	1
YBL081W	0.87755	1	1	2	1	1	1	1	1	1	1	1	1	1	1
YBL082C	0.87755	1	1	1	1	1	1	1	1	1	1	1	1	1	1
YBL084C	0.87755	1	1	1	1	1	1	1	1	1	1	1	1	1	1
YBL085W	0.87755	1	1	1	1	1	1	1	1	2	1	1	1	1	1
YBL086C	0.91837	1	1	1	1	1	1	1	1	2	1	1	1	1	1
YBL087C	0.89796	1	1	1	1	1	1	1	1	1	1	1	1	1	1
YBL088C	1.04082	1	1	1	1	1	1	1	1	1	1	1	1	1	1
YBL089W	0.95918	1	1	1	1	1	1	1	1	1	1	1	1	1	1
YBL090W	0.95918	1	1	1	1	1	1	1	1	1	1	1	1	1	1
YBL091C	0.97959	1	1	1	1	1	1	1	1	1	1	1	1	1	1
YBL091C-A	1	1	1	1	1	1	1	1	1	1	1	1	1	1	1
YBL092W	1.06122	1	1	1	1	1	1	1	1	2	1	1	1	1	1
YBL093C	1.04082	1	1	1	1	1	1	1	1	2	1	1	1	1	1
YBL095W	1.02041	1	1	1	1	1	1	1	1	2	1	1	1	1	1
YBL097W	0.97959	1	1	1	1	1	1	1	1	1	1	1	1	1	1
YBL098W	0.93878	1	1	1	1	1	1	1	1	1	1	1	1	1	1
YBL099W	0.95918	1	1	1	1	1	1	1	1	1	1	1	1	1	1
YBL100W-A	1	1	1	1	1	1	1	1	1	1	1	1	1	2	1
YBL100W-B	0.97959	1	1	1	1	2	1	1	1	1	1	1	1	2	1
YBL100W-C	0.85714	1	1	1	1	1	1	1	1	1	1	1	1	1	1
YBL101C	0.81633	1	1	1	1	1	1	1	1	1	1	1	1	1	1
YBL102W	0.77551	1	1	1	1	1	1	1	1	2	1	1	1	1	1
YBL103C	0.71429	1	1	1	1	1	1	1	1	1	1	1	1	1	1
YBL104C	0.65306	1	1	1	1	1	1	1	1	2	1	1	1	1	1
YBL105C	0.59184	1	1	1	1	1	1	1	1	2	1	1	1	1	1
YBL106C	0.63265	1	1	1	1	1	1	1	1	2	1	1	1	1	1
YBL107C	0.59184	1	1	1	1	1	1	1	1	3	1	1	1	1	1
YBL108C-A	0.61224	1	1	1	1	2	1	2	1	3	1	1	1	1	1	TEL02L
YBL111C	0.69388	1	1	2	1	2	1	3	1	4	1	1	1	2	1	TEL02L
YBL112C	0.71429	1	1	2	1	2	1	3	1	4	1	1	1	2	1	TEL02L
YBL113C	0.65306	1	1	2	1	2	1	2	1	4	1	1	1	2	1	TEL02L
YBR001C	0.93878	1	1	1	1	2	1	1	1	1	1	1	1	1	1
YBR002C	0.97959	1	1	1	1	2	1	1	1	1	1	1	1	1	1
YBR003W	1.04082	1	1	1	1	2	1	1	1	1	1	1	1	1	1
YBR004C	1	1	1	1	1	1	1	1	1	1	1	1	1	1	1
YBR005W	1.05102	1	1	1	1	2	1	1	1	1	1	1	1	1	1
YBR006W	1.08163	1	1	1	1	1	1	1	1	1	1	1	1	1	1
YBR007C	1.12245	1	1	1	1	1	1	1	1	1	1	1	1	1	1
YBR008C	1.12245	1	1	1	1	1	1	1	1	1	1	1	1	1	1
YBR009C	1.16327	1	1	1	1	1	1	1	1	1	1	1	1	1	1
YBR010W	1.12245	1	1	1	1	1	1	1	1	1	1	1	1	1	1
YBR011C	1.12245	1	1	1	1	1	1	1	1	1	1	1	1	1	1
YBR012W-A	1.30612	1	1	1	1	2	1	1	1	2	1	2	1	2	1
YBR012W-B	1.44898	1	1	2	1	2	1	2	1	2	1	2	1	2	1	ty
YBR013C	1.14286	1	1	1	1	1	1	1	1	1	1	1	1	1	1
YBR014C	1.18367	1	1	1	1	1	1	1	1	1	1	1	1	1	1
YBR015C	1.18367	1	1	1	1	1	1	1	1	1	1	1	1	1	1
YBR016W	1.12245	1	1	1	1	1	1	1	1	1	1	1	1	1	1
YBR017C	1.12245	1	1	1	1	1	1	1	1	1	1	1	1	1	1
YBR018C	1.14286	1	1	1	1	1	1	1	1	1	1	1	1	1	1
YBR019C	1.04082	1	1	2	1	1	1	1	1	1	1	1	1	1	1
YBR020W	1.04082	1	1	1	1	1	1	1	1	1	1	1	1	1	1
YBR021W	1.04082	1	1	1	1	1	1	1	1	1	1	1	1	1	1
YBR022W	1.04082	1	1	1	1	1	1	1	1	1	1	1	1	1	1
YBR023C	1.02041	1	1	1	1	1	1	1	1	1	1	1	1	1	1
YBR024W	1.06122	1	1	1	1	1	1	1	1	1	1	1	1	1	1
YBR025C	1.02041	1	1	1	1	1	1	1	1	1	1	1	1	1	1
YBR026C	0.97959	1	1	1	1	1	1	1	1	1	1	1	1	1	1
YBR028C	0.97959	1	1	1	1	1	1	1	1	1	1	1	1	1	1
YBR029C	1	1	1	1	1	1	1	1	1	1	1	1	1	1	1
YBR030W	1.04082	1	1	1	1	1	1	1	1	1	1	1	1	1	1
YBR031W	1.06122	1	1	1	1	1	1	1	1	1	1	1	1	1	1
YBR033W	1.10204	1	1	1	1	1	1	1	1	1	1	1	1	1	1
YBR034C	1.12245	1	1	1	1	1	1	1	1	1	1	1	1	1	1
YBR035C	1.08163	1	1	1	1	1	1	1	1	1	1	1	1	1	1
YBR036C	0.97959	1	1	1	1	1	1	1	1	1	1	1	1	1	1
YBR037C	0.97959	1	1	1	1	1	1	1	1	1	1	1	1	1	1
YBR038W	1.06122	1	1	1	1	1	1	1	1	1	1	1	1	1	1
YBR039W	1.06122	1	1	1	1	1	1	1	1	1	1	1	1	1	1
YBR040W	1	1	1	2	1	1	1	1	1	1	1	1	1	1	1
YBR041W	1	1	1	1	1	1	1	1	1	1	1	1	1	1	1
YBR042C	1.02041	1	1	1	1	1	1	1	1	1	1	1	1	1	1
YBR043C	0.91837	1	1	1	1	1	1	1	1	1	1	1	1	1	1
YBR044C	0.85714	1	1	1	1	1	1	1	1	1	1	1	1	1	1
YBR045C	0.91837	1	1	2	1	1	1	1	1	1	1	1	1	1	1
YBR046C	0.95918	1	1	1	1	1	1	1	1	1	1	1	1	1	1
YBR047W	1.02041	1	1	1	1	1	1	1	1	1	1	1	1	1	1
YBR048W	0.91837	1	1	1	1	1	1	1	1	1	1	1	1	1	1
YBR049C	0.83673	1	1	1	1	1	1	1	1	1	1	1	1	1	1
YBR050C	0.85714	1	1	1	1	1	1	1	1	1	1	1	1	1	1
YBR052C	0.91837	1	1	1	1	1	1	1	1	1	1	1	1	1	1
YBR053C	0.97959	1	1	1	1	1	1	1	1	1	1	1	1	1	1
YBR054W	1.04082	1	1	1	1	1	1	1	1	1	1	1	1	1	1
YBR055C	1.04082	1	1	1	1	1	1	1	1	1	1	1	1	1	1
YBR056W	1.02041	1	1	1	1	1	1	1	1	1	1	1	1	1	1
YBR056W-A	1.14286	1	1	1	1	1	1	1	1	1	1	1	1	1	1
YBR057C	1.08163	1	1	1	1	1	1	1	1	1	1	1	1	1	1
YBR058C	0.97959	1	1	1	1	1	1	1	1	1	1	1	1	1	1
YBR058C-A	0.97959	1	1	1	1	1	1	1	1	1	1	1	1	1	1
YBR059C	1.04082	1	1	1	1	1	1	1	1	1	1	1	1	1	1
YBR060C	1.10204	1	1	1	1	1	1	1	1	1	1	1	1	1	1
YBR061C	1.06122	1	1	1	1	1	1	1	1	1	1	1	1	1	1
YBR062C	1	1	1	1	1	1	1	1	1	1	1	1	1	1	1
YBR063C	1	1	1	1	1	1	1	1	1	1	1	1	1	1	1
YBR065C	1.02041	1	1	1	1	1	1	1	1	1	1	1	1	1	1
YBR066C	1.04082	1	1	1	1	1	1	1	1	1	1	1	1	1	1
YBR067C	0.95918	1	1	1	1	1	1	1	1	1	1	1	1	1	1
YBR068C	1	1	1	1	1	1	1	1	1	1	1	1	1	1	1
YBR069C	0.95918	1	1	1	1	1	1	1	1	1	1	1	1	1	1
YBR070C	0.91837	1	1	1	1	1	1	1	1	1	1	1	1	1	1
YBR071W	1.04082	1	1	1	1	1	1	1	1	1	1	1	1	1	1
YBR072C-A	1.08163	1	1	1	1	1	1	1	1	1	1	1	1	1	1
YBR072W	1.08163	1	1	1	1	1	1	1	1	1	1	1	1	1	1
YBR073W	1.04082	1	1	1	1	1	1	1	1	1	1	1	1	1	1
YBR074W	1.02041	1	1	1	1	1	1	1	1	1	1	1	1	1	1
YBR076W	1.04082	1	1	1	1	1	1	1	1	1	1	1	1	1	1
YBR077C	1.04082	1	1	1	1	1	1	1	1	1	1	1	1	1	1
YBR078W	1.04082	1	1	1	1	1	1	1	1	1	1	1	1	1	1
YBR079C	1.16327	1	1	1	1	1	1	1	1	1	1	1	1	1	1
YBR080C	1.2449	1	1	1	1	1	1	1	1	1	1	1	1	1	1
YBR081C	1.08163	1	1	1	1	1	1	1	1	1	1	1	1	1	1
YBR082C	1.18367	1	1	1	1	1	1	1	1	1	1	1	1	1	1
YBR083W	1.14286	1	1	1	1	1	1	1	1	1	1	1	1	1	1
YBR084C-A	1.20408	1	1	1	1	1	1	1	1	2	1	1	1	1	1
YBR084W	1.16327	1	1	1	1	1	1	1	1	2	1	1	1	1	1
YBR085C-A	1.04082	1	1	1	1	1	1	1	1	1	1	1	1	1	1
YBR085W	1.08163	1	1	1	1	1	1	1	1	1	1	1	1	1	1
YBR086C	1.04082	1	1	1	1	1	1	1	1	1	1	1	1	1	1
YBR087W	1	1	1	1	1	1	1	1	1	1	1	1	1	1	1
YBR088C	0.97959	1	1	1	1	1	1	1	1	1	1	1	1	1	1
YBR089C-A	0.97959	1	1	1	1	1	1	1	1	1	1	1	1	1	1
YBR090C	0.95918	1	1	1	1	1	1	1	1	1	1	1	1	1	1
YBR091C	0.93878	1	1	2	1	1	1	1	1	1	1	1	1	1	1
YBR092C	0.93878	1	1	1	1	1	1	1	1	1	1	1	1	1	1
YBR093C	0.87755	1	1	1	1	1	1	1	1	1	1	1	1	1	1
YBR094W	0.93878	1	1	2	1	1	1	1	1	1	1	1	1	1	1
YBR095C	0.93878	1	1	2	1	1	1	1	1	1	1	1	1	1	1
YBR096W	0.97959	1	1	1	1	1	1	1	1	1	1	1	1	1	1
YBR097W	1.06122	1	1	1	1	1	1	1	1	1	1	1	1	1	1
YBR098W	1.18367	1	1	1	1	1	1	1	1	1	1	1	1	1	1
YBR101C	1.16327	1	1	2	1	1	1	1	1	1	1	1	1	1	1
YBR102C	1	1	1	1	1	1	1	1	1	1	1	1	1	1	1
YBR103W	0.95918	1	1	1	1	1	1	1	1	1	1	1	1	1	1
YBR104W	0.95918	1	1	1	1	1	1	1	1	1	1	1	1	1	1
YBR105C	0.91837	1	1	1	1	1	1	1	1	1	1	1	1	1	1
YBR106W	0.95918	1	1	1	1	1	1	1	1	1	1	1	1	1	1
YBR107C	0.91837	1	1	2	1	1	1	1	1	1	1	1	1	1	1
YBR108W	0.91837	1	1	1	1	1	1	1	1	1	1	1	1	1	1
YBR109C	0.97959	1	1	1	1	1	1	1	1	1	1	1	1	1	1
YBR110W	1	1	1	1	1	1	1	1	1	1	1	1	1	1	1
YBR111C	1.04082	1	1	1	1	1	1	1	1	1	1	1	1	1	1
YBR111W-A	1.02041	1	1	1	1	1	1	1	1	1	1	1	1	1	1
YBR112C	1.10204	1	1	1	1	1	1	1	1	1	1	1	1	1	1
YBR114W	1.18367	1	1	1	1	1	1	1	1	1	1	1	1	1	1
YBR115C	1.22449	1	1	1	1	1	1	1	1	1	1	1	1	1	1
YBR117C	1.20408	1	1	1	1	1	1	1	1	1	1	1	1	1	1
YBR118W	1	1	1	1	1	2	1	1	1	1	1	1	1	1	1
YBR119W	0.95918	1	1	1	1	2	1	1	1	1	1	1	1	1	1
YBR120C	1	1	1	1	1	2	1	1	1	1	1	1	1	1	1
YBR121C	0.97959	1	1	1	1	1	1	1	1	1	1	1	1	1	1
YBR122C	0.97959	1	1	1	1	1	1	1	1	1	1	1	1	1	1
YBR123C	1	1	1	1	1	1	1	1	1	1	1	1	1	1	1
YBR125C	1	1	1	1	1	1	1	1	1	1	1	1	1	1	1
YBR126C	0.97959	1	1	1	1	1	1	1	1	1	1	1	1	1	1
YBR126W-A	0.93878	1	1	1	1	1	1	1	1	1	1	1	1	1	1
YBR127C	0.97959	1	1	1	1	1	1	1	1	1	1	1	1	1	1
YBR128C	0.95918	1	1	1	1	1	1	1	1	1	1	1	1	1	1
YBR129C	0.97959	1	1	1	1	1	1	1	1	1	1	1	1	1	1
YBR130C	1	1	1	1	1	1	1	1	1	1	1	1	1	1	1
YBR131W	0.91837	1	1	1	1	1	1	1	1	1	1	1	1	1	1
YBR132C	0.95918	1	1	1	1	1	1	1	1	1	1	1	1	1	1
YBR133C	0.77551	1	1	1	1	1	1	1	1	1	1	1	1	1	1
YBR135W	0.73469	1	1	1	1	1	1	1	1	1	1	1	1	1	1
YBR136W	0.73469	1	1	1	1	1	1	1	1	1	1	1	1	1	1
YBR137W	0.83673	1	1	1	1	1	1	1	1	1	1	1	1	1	1
YBR138C	0.73469	1	1	1	1	1	1	1	1	1	1	1	1	1	1
YBR139W	0.73469	1	1	1	1	1	1	1	1	1	1	1	1	1	1
YBR140C	0.81633	1	1	1	1	1	1	1	1	1	1	1	1	1	1
YBR141C	0.81633	1	1	1	1	1	1	1	1	1	1	1	1	1	1
YBR142W	0.95918	1	1	1	1	1	1	1	1	1	1	1	1	1	1
YBR143C	0.91837	1	1	1	1	1	1	1	1	1	1	1	1	1	1
YBR145W	0.85714	1	1	1	1	1	1	1	1	1	1	1	1	1	1
YBR146W	0.91837	1	1	1	1	1	1	1	1	1	1	1	1	1	1
YBR147W	0.91837	1	1	1	1	1	1	1	1	1	1	1	1	1	1
YBR148W	1	1	1	1	1	1	1	1	1	1	1	1	1	1	1
YBR149W	1.02041	1	1	1	1	1	1	1	1	1	1	1	1	1	1
YBR150C	1.02041	1	1	1	1	1	1	1	1	1	1	1	1	1	1
YBR151W	1.06122	1	1	1	1	1	1	1	1	1	1	1	1	1	1
YBR152W	1.02041	1	1	1	1	1	1	1	1	1	1	1	1	1	1
YBR153W	1.02041	1	1	1	1	1	1	1	1	1	1	1	1	1	1
YBR154C	1	1	1	2	1	1	1	1	1	1	1	1	1	1	1
YBR155W	1	1	1	2	1	1	1	1	1	1	1	1	1	1	1
YBR156C	1	1	1	1	1	1	1	1	1	1	1	1	1	1	1
YBR157C	1.04082	1	1	1	1	1	1	1	1	1	1	1	1	1	1
YBR158W	1.04082	1	1	1	1	1	1	1	1	1	1	1	1	1	1
YBR159W	1.04082	1	1	1	1	1	1	1	1	1	1	1	1	1	1
YBR160W	1.10204	1	1	1	1	1	1	1	1	1	1	1	1	1	1
YBR161W	1.08163	1	1	2	1	1	1	1	1	1	1	1	1	1	1
YBR162C	1.10204	1	1	2	1	1	1	1	1	1	1	1	1	1	1
YBR162W-A	1.08163	1	1	2	1	1	1	1	1	1	1	1	1	1	1
YBR163W	1	1	1	2	1	1	1	1	1	1	1	1	1	1	1
YBR164C	1.02041	1	1	2	1	1	1	1	1	1	1	1	1	1	1
YBR165W	1.04082	1	1	2	1	1	1	1	1	1	1	1	1	1	1
YBR166C	1.06122	1	1	2	1	1	1	1	1	1	1	1	1	1	1
YBR167C	1.02041	1	1	1	1	1	1	1	1	1	1	1	1	1	1
YBR168W	1.06122	1	1	2	1	1	1	1	1	1	1	1	1	1	1
YBR169C	0.95918	1	1	1	1	1	1	1	1	1	1	1	1	1	1
YBR170C	0.93878	1	1	1	1	1	1	1	1	1	1	1	1	1	1
YBR171W	0.95918	1	1	1	1	1	1	1	1	1	1	1	1	1	1
YBR172C	0.91837	1	1	1	1	1	1	1	1	1	1	1	1	1	1
YBR173C	0.93878	1	1	1	1	1	1	1	1	1	1	1	1	1	1
YBR175W	0.97959	1	1	1	1	1	1	1	1	1	1	1	1	1	1
YBR176W	1	1	1	1	1	1	1	1	1	1	1	1	1	1	1
YBR177C	1.10204	1	1	1	1	1	1	1	1	1	1	1	1	1	1
YBR179C	1.14286	1	1	1	1	1	1	1	1	1	1	1	1	1	1
YBR180W	1.28571	1	1	1	1	1	1	1	1	1	1	1	1	1	1
YBR181C	1.30612	1	1	1	1	1	1	1	1	1	1	1	1	1	1
YBR182C	1.18367	1	1	1	1	1	1	1	1	1	1	1	1	1	1
YBR182C-A	1.14286	1	1	1	1	1	1	1	1	1	1	1	1	1	1
YBR183W	1.10204	1	1	1	1	1	1	1	1	1	1	1	1	1	1
YBR184W	1.10204	1	1	1	1	1	1	1	1	1	1	1	1	1	1
YBR185C	1.12245	1	1	1	1	2	1	1	1	1	1	2	1	1	1
YBR186W	1.02041	1	1	1	1	1	1	1	1	1	1	1	1	1	1
YBR187W	0.97959	1	1	1	1	1	1	1	1	1	1	1	1	1	1
YBR188C	0.93878	1	1	1	1	1	1	1	1	1	1	1	1	1	1
YBR189W	0.91837	1	1	1	1	1	1	1	1	1	1	1	1	1	1
YBR191W	0.87755	1	1	1	1	1	1	1	1	1	1	1	1	1	1
YBR192W	0.85714	1	1	1	1	2	1	1	1	1	1	1	1	1	1
YBR193C	0.87755	1	1	1	1	1	1	1	1	1	1	1	1	1	1
YBR194W	0.83673	1	1	1	1	1	1	1	1	1	1	1	1	1	1
YBR195C	0.79592	1	1	1	1	1	1	1	1	1	1	1	1	1	1
YBR196C	0.73469	1	1	1	1	1	1	1	1	1	1	1	1	1	1
YBR196C-A	0.79592	1	1	1	1	1	1	1	1	1	1	1	1	1	1
YBR196C-B	0.79592	1	1	1	1	1	1	1	1	1	1	1	1	1	1
YBR197C	0.83673	1	1	1	1	1	1	1	1	1	1	1	1	1	1
YBR198C	0.85714	1	1	1	1	1	1	1	1	1	1	1	1	1	1
YBR199W	1	1	1	1	1	1	1	1	1	2	1	1	1	1	1
YBR200W	0.95918	1	1	1	1	1	1	1	1	1	1	1	1	1	1
YBR200W-A	0.93878	1	1	1	1	1	1	1	1	1	1	1	1	1	1
YBR201C-A	0.87755	1	1	1	1	1	1	1	1	1	1	1	1	1	1
YBR201W	0.91837	1	1	1	1	1	1	1	1	1	1	1	1	1	1
YBR202W	0.93878	1	1	1	1	1	1	1	1	1	1	1	1	1	1
YBR203W	1.08163	1	1	1	1	1	1	1	1	2	1	1	1	1	1
YBR204C	1.16327	1	1	1	1	1	1	1	1	2	1	1	1	1	1
YBR205W	1.18367	1	1	1	1	1	1	1	1	2	1	1	1	1	1
YBR207W	1.18367	1	1	1	1	1	1	1	1	2	1	1	1	1	1
YBR208C	1.12245	1	1	1	1	1	1	1	1	1	1	1	1	1	1
YBR210W	1.22449	1	1	1	1	1	1	1	1	1	1	1	1	1	1
YBR211C	1.18367	1	1	1	1	1	1	1	1	1	1	1	1	1	1
YBR212W	1.14286	1	1	1	1	1	1	1	1	1	1	1	1	1	1
YBR213W	1.14286	1	1	1	1	1	1	1	1	1	1	1	1	1	1
YBR214W	1.20408	1	1	1	1	1	1	1	1	1	1	1	1	1	1
YBR215W	1.16327	1	1	1	1	1	1	1	1	1	1	1	1	1	1
YBR216C	1.12245	1	1	1	1	1	1	1	1	1	1	1	1	1	1
YBR217W	1.10204	1	1	1	1	1	1	1	1	1	1	1	1	1	1
YBR218C	1.10204	1	1	1	1	1	1	1	1	1	1	1	1	1	1
YBR219C	1.04082	1	1	1	1	1	1	1	1	1	1	1	1	1	1
YBR220C	1.04082	1	1	1	1	1	1	1	1	1	1	1	1	1	1
YBR221C	1.02041	1	1	1	1	1	1	1	1	1	1	1	1	1	1
YBR221W-A	1.04082	1	1	1	1	1	1	1	1	1	1	1	1	1	1
YBR222C	1.02041	1	1	1	1	1	1	1	1	1	1	1	1	1	1
YBR223C	1	1	1	1	1	1	1	1	1	1	1	1	1	1	1
YBR225W	1.06122	1	1	1	1	1	1	1	1	1	1	1	1	1	1
YBR227C	1.16327	1	1	1	1	1	1	1	1	1	1	1	1	1	1
YBR228W	1.14286	1	1	1	1	1	1	1	1	1	1	1	1	1	1
YBR229C	1.08163	1	1	1	1	1	1	1	1	1	1	1	1	1	1
YBR230C	1.08163	1	1	1	1	1	1	1	1	1	1	1	1	1	1
YBR230W-A	1.12245	1	1	1	1	1	1	1	1	1	1	1	1	1	1
YBR231C	1.10204	1	1	1	1	1	1	1	1	1	1	1	1	1	1
YBR233W	1.08163	1	1	1	1	1	1	1	1	1	1	1	1	1	1
YBR233W-A	1.06122	1	1	1	1	1	1	1	1	1	1	1	1	1	1
YBR234C	1.04082	1	1	1	1	1	1	1	1	1	1	1	1	1	1
YBR235W	1.12245	1	1	1	1	1	1	1	1	1	1	1	1	1	1
YBR236C	1.10204	1	1	1	1	1	1	1	1	1	1	1	1	1	1
YBR237W	1.12245	1	1	1	1	1	1	1	1	1	1	1	1	1	1
YBR238C	1.10204	1	1	1	1	1	1	1	1	1	1	1	1	1	1
YBR239C	1.16327	1	1	1	1	1	1	1	1	1	1	1	1	1	1
YBR240C	1.14286	1	1	1	1	1	1	1	1	1	1	1	1	1	1
YBR241C	1.12245	1	1	1	1	2	1	1	1	1	1	1	1	1	1
YBR242W	1.08163	1	1	1	1	2	1	1	1	1	1	1	1	1	1
YBR243C	1.10204	1	1	1	1	2	1	1	1	1	1	1	1	2	1
YBR244W	1.12245	1	1	1	1	1	1	1	1	1	1	1	1	1	1
YBR245C	1.14286	1	1	1	1	1	1	1	1	1	1	1	1	1	1
YBR246W	1.06122	1	1	1	1	1	1	1	1	1	1	1	1	1	1
YBR247C	0.97959	1	1	1	1	1	1	1	1	1	1	1	1	1	1
YBR248C	1	1	1	1	1	1	1	1	1	1	1	1	1	1	1
YBR249C	1.04082	1	1	1	1	1	1	1	1	1	1	1	1	1	1
YBR250W	1.10204	1	1	1	1	1	1	1	1	1	1	1	1	1	1
YBR251W	1.10204	1	1	1	1	1	1	1	1	1	1	1	1	1	1
YBR252W	1.12245	1	1	1	1	1	1	1	1	1	1	1	1	1	1
YBR253W	1.16327	1	1	1	1	1	1	1	1	1	1	1	1	1	1
YBR254C	1.12245	1	1	1	1	1	1	1	1	1	1	1	1	1	1
YBR255C-A	1.10204	1	1	1	1	1	1	1	1	2	1	1	1	1	1
YBR255W	1.06122	1	1	1	1	1	1	1	1	1	1	1	1	1	1
YBR256C	1.14286	1	1	1	1	1	1	1	1	1	1	1	1	1	1
YBR257W	1.02041	1	1	1	1	1	1	1	1	1	1	1	1	1	1
YBR258C	1	1	1	1	1	1	1	1	1	1	1	1	1	1	1
YBR259W	1	1	1	1	1	1	1	1	1	1	1	1	1	1	1
YBR260C	0.95918	1	1	1	1	1	1	1	1	1	1	1	1	1	1
YBR261C	0.89796	1	1	1	1	1	1	1	1	1	1	1	1	1	1
YBR262C	0.81633	1	1	1	1	1	1	1	1	1	1	1	1	1	1
YBR263W	0.77551	1	1	1	1	1	1	1	1	1	1	1	1	1	1
YBR264C	0.79592	1	1	1	1	1	1	1	1	1	1	1	1	1	1
YBR265W	0.83673	1	1	1	1	1	1	1	1	1	1	1	1	1	1
YBR267W	0.89796	1	1	1	1	1	1	1	1	1	1	1	1	1	1
YBR268W	0.93878	1	1	1	1	1	1	1	1	1	1	1	1	1	1
YBR269C	0.97959	1	1	1	1	1	1	1	1	1	1	1	1	1	1
YBR270C	0.91837	1	1	1	1	1	1	1	1	1	1	1	1	1	1
YBR271W	0.91837	1	1	1	1	1	1	1	1	1	1	1	1	1	1
YBR272C	0.91837	1	1	1	1	1	1	1	1	1	1	1	1	1	1
YBR273C	0.87755	1	1	1	1	1	1	1	1	1	1	1	1	1	1
YBR274W	0.91837	1	1	1	1	1	1	1	1	1	1	1	1	1	1
YBR275C	0.79592	1	1	1	1	1	1	1	1	1	1	1	1	1	1
YBR276C	0.85714	1	1	1	1	1	1	1	1	1	1	1	1	1	1
YBR278W	0.91837	1	1	1	1	1	1	1	1	1	1	1	1	1	1
YBR279W	0.97959	1	1	1	1	1	1	1	1	1	1	1	1	1	1
YBR280C	1	1	1	1	1	1	1	1	1	1	1	1	1	1	1
YBR281C	0.93878	1	1	1	1	1	1	1	1	1	1	1	1	1	1
YBR282W	0.91837	1	1	2	1	1	1	1	1	1	1	1	1	1	1
YBR283C	0.91837	1	1	1	1	1	1	1	1	1	1	1	1	1	1
YBR284W	0.83673	1	1	2	1	1	1	1	1	1	1	1	1	1	1
YBR285W	0.81633	1	1	1	1	1	1	1	1	1	1	1	1	1	1
YBR286W	0.81633	1	1	1	1	1	1	1	1	1	1	1	1	1	1
YBR287W	0.79592	1	1	1	1	1	1	1	1	1	1	1	1	1	1
YBR288C	0.81633	1	1	1	1	1	1	1	1	1	1	1	1	1	1
YBR289W	0.7551	1	1	1	1	1	1	1	1	1	1	1	1	1	1
YBR290W	0.69388	1	1	1	1	1	1	1	1	1	1	1	1	1	1
YBR291C	0.73469	1	1	1	1	1	1	1	1	1	1	1	1	1	1
YBR293W	0.67347	1	1	1	1	1	1	1	1	1	1	1	1	1	1
YBR294W	0.77551	1	1	1	1	1	1	1	1	1	1	1	1	1	1
YBR295W	0.67347	1	1	1	1	1	1	1	1	1	1	1	1	1	1
YBR296C	0.67347	1	1	1	1	1	1	1	1	1	1	1	1	1	1
YBR296C-A	0.67347	1	1	1	1	1	1	1	1	1	1	1	1	1	1
YBR297W	0.65306	1	1	1	1	1	1	2	1	1	1	1	1	1	1	TEL02R
YBR298C	0.65306	1	1	2	1	1	1	2	1	1	1	1	1	1	1	TEL02R
YBR298C-A	0.73469	1	1	2	1	1	1	2	1	1	1	1	1	1	1	TEL02R
YBR299W	0.71429	1	1	2	1	1	1	2	1	1	1	1	1	1	1	TEL02R
YBR301W	0.71429	1	1	2	1	1	1	2	1	1	1	1	1	2	1	TEL02R
YBR302C	0.71429	1	1	3	1	1	1	2	1	1	1	1	1	2	1	TEL02R
YCL001W	1.06122	1	1	1	1	1	1	1	1	1	1	1	1	1	1
YCL001W-A	1.08163	1	1	1	1	1	1	1	1	1	1	1	1	1	1
YCL001W-B	1.10204	1	1	1	1	2	1	1	1	1	1	1	1	1	1
YCL002C	1.06122	1	1	1	1	1	1	1	1	1	1	1	1	1	1
YCL004W	1.06122	1	1	1	1	1	1	1	1	1	1	1	1	1	1
YCL005W	1.08163	1	1	1	1	1	1	1	1	1	1	1	1	1	1
YCL005W-A	1.10204	1	1	1	1	1	1	1	1	1	1	1	1	1	1
YCL008C	1.08163	1	1	1	1	1	1	1	1	1	1	1	1	1	1
YCL009C	1.12245	1	1	1	1	1	1	1	1	1	1	1	1	1	1
YCL010C	1.16327	1	1	1	1	1	1	1	1	1	1	1	1	1	1
YCL011C	1.20408	1	1	1	1	1	1	1	1	1	1	1	1	1	1
YCL012C	1.26531	1	1	1	1	1	1	1	1	1	1	1	1	1	1
YCL014W	1.2449	1	1	1	1	1	1	1	1	1	1	1	1	1	1
YCL016C	1.30612	1	1	1	1	1	1	1	1	1	1	1	1	1	1
YCL017C	1.28571	1	1	1	1	1	1	1	1	1	1	1	1	1	1
YCL018W	1.2449	1	1	1	1	1	1	1	1	1	1	1	1	1	1
YCL019W	1.42857	2	1	3	1	2	1	2	1	2	1	2	1	3	1	ty
YCL020W	1.2449	1	1	2	1	1	1	2	1	1	1	2	1	3	1	ty
YCL021W-A	1.06122	1	1	2	1	1	1	0	0	1	1	1	1	1	1	Del:1751
YCL024W	1.04082	1	1	1	1	1	1	1	1	1	1	1	1	1	1
YCL025C	0.91837	1	1	1	1	1	1	1	1	1	1	1	1	1	1
YCL026C-A	0.97959	1	1	1	1	1	1	1	1	1	1	1	1	1	1
YCL026C-B	1	1	1	1	1	1	1	1	1	1	1	1	1	1	1
YCL027W	1.06122	1	1	1	1	1	1	1	1	1	1	1	1	1	1
YCL028W	1.12245	1	1	1	1	1	1	1	1	1	1	1	1	1	1
YCL029C	1.10204	1	1	1	1	1	1	1	1	1	1	1	1	1	1
YCL030C	1.02041	1	1	1	1	1	1	1	1	1	1	1	1	1	1
YCL031C	0.95918	1	1	1	1	1	1	1	1	1	1	1	1	1	1
YCL032W	0.95918	1	1	1	1	2	1	1	1	1	1	1	1	1	1
YCL033C	0.97959	1	1	1	1	2	1	1	1	1	1	1	1	1	1
YCL034W	0.97959	1	1	1	1	2	1	1	1	1	1	1	1	1	1
YCL035C	0.95918	1	1	1	1	1	1	1	1	1	1	1	1	1	1
YCL036W	0.91837	1	1	1	1	1	1	1	1	1	1	1	1	1	1
YCL037C	0.85714	1	1	1	1	1	1	1	1	1	1	1	1	1	1
YCL038C	0.87755	1	1	1	1	1	1	1	1	1	1	1	1	1	1
YCL039W	0.93878	1	1	1	1	1	1	1	1	1	1	1	1	1	1
YCL040W	0.91837	1	1	1	1	1	1	1	1	1	1	1	1	1	1
YCL042W	0.89796	1	1	1	1	1	1	1	1	1	1	1	1	1	1
YCL043C	0.95918	1	1	1	1	1	1	1	1	1	1	1	1	1	1
YCL044C	0.87755	1	1	1	1	1	1	1	1	1	1	1	1	1	1
YCL045C	0.81633	1	1	1	1	1	1	1	1	1	1	1	1	1	1
YCL047C	0.85714	1	1	1	1	1	1	1	1	1	1	1	1	1	1
YCL048W	0.93878	1	1	1	1	1	1	1	1	1	1	1	1	1	1
YCL048W-A	0.93878	1	1	1	1	1	1	1	1	1	1	1	1	1	1
YCL049C	0.81633	1	1	1	1	1	1	1	1	1	1	1	1	1	1
YCL050C	0.79592	1	1	1	1	1	1	1	1	1	1	1	1	1	1
YCL051W	0.81633	1	1	1	1	1	1	1	1	1	1	1	1	1	1
YCL052C	0.83673	1	1	1	1	1	1	1	1	1	1	1	1	1	1
YCL054W	0.81633	1	1	1	1	1	1	1	1	1	1	1	1	1	1
YCL054W-A	0.81633	1	1	1	1	1	1	1	1	1	1	1	1	1	1
YCL055W	0.81633	1	1	1	1	1	1	1	1	1	1	1	1	1	1
YCL056C	0.85714	1	1	1	1	1	1	1	1	1	1	1	1	1	1
YCL057C-A	0.81633	1	1	1	1	1	1	1	1	1	1	1	1	1	1
YCL057W	0.83673	1	1	1	1	1	1	1	1	1	1	1	1	1	1
YCL058C	0.83673	1	1	1	1	1	1	1	1	1	1	1	1	1	1
YCL058W-A	0.83673	1	1	1	1	1	1	1	1	1	1	1	1	1	1
YCL059C	0.79592	1	1	1	1	1	1	1	1	1	1	1	1	1	1
YCL061C	0.79592	1	1	1	1	1	1	1	1	1	1	1	1	1	1
YCL063W	0.77551	1	1	1	1	1	1	1	1	1	1	1	1	1	1
YCL064C	0.77551	1	1	1	1	1	1	1	1	1	1	1	1	1	1
YCL066W	0.77551	1	1	1	1	1	1	1	1	1	1	1	1	1	1
YCL067C	0.79592	1	1	1	1	1	1	1	1	1	1	1	1	1	1
YCL068C	0.7551	1	1	1	1	1	1	1	1	1	1	1	1	1	1
YCL069W	0.73469	1	1	1	1	1	1	1	1	1	1	1	1	1	1
YCL073C	0.71429	1	1	1	1	1	1	2	1	1	1	1	1	1	1	TEL03L
YCL074W	0.77551	1	1	1	1	1	1	2	1	1	1	1	1	1	1	TEL03L
YCL075W	0.7551	1	1	1	1	1	1	2	1	1	1	1	1	1	1	TEL03L
YCR002C	1.16327	1	1	1	1	1	1	1	1	1	1	1	1	1	1
YCR003W	1.16327	1	1	1	1	1	1	1	1	1	1	1	1	1	1
YCR004C	1.16327	1	1	1	1	1	1	1	1	1	1	1	1	1	1
YCR005C	1.28571	1	1	1	1	1	1	1	1	1	1	1	1	1	1
YCR007C	1.10204	1	1	1	1	1	1	1	1	1	1	1	1	1	1
YCR008W	1.06122	1	1	1	1	1	1	1	1	1	1	1	1	1	1
YCR009C	1.02041	1	1	1	1	1	1	1	1	1	1	1	1	1	1
YCR010C	1.06122	1	1	1	1	1	1	1	1	1	1	1	1	1	1
YCR011C	0.93878	1	1	1	1	1	1	1	1	1	1	1	1	1	1
YCR012W	0.91837	1	1	1	1	1	1	1	1	2	1	1	1	1	1
YCR014C	0.85714	1	1	1	1	1	1	1	1	1	1	1	1	1	1
YCR015C	0.89796	1	1	1	1	1	1	1	1	1	1	1	1	1	1
YCR016W	0.97959	1	1	1	1	1	1	1	1	2	1	1	1	1	1
YCR017C	1.02041	1	1	1	1	1	1	1	1	1	1	1	1	1	1
YCR018C	0.85714	1	1	1	1	1	1	1	1	1	1	1	1	1	1
YCR019W	1.08163	1	1	1	1	1	1	1	1	1	1	1	1	1	1
YCR020C	1.08163	1	1	1	1	1	1	1	1	1	1	1	1	1	1
YCR020C-A	1.12245	1	1	1	1	1	1	1	1	1	1	1	1	1	1
YCR020W-B	1.18367	1	1	1	1	1	1	1	1	1	1	1	1	1	1
YCR021C	1.20408	1	1	1	1	1	1	1	1	1	1	1	1	1	1
YCR023C	1.20408	1	1	1	1	1	1	1	1	1	1	1	1	1	1
YCR024C	1.10204	1	1	1	1	1	1	1	1	1	1	1	1	1	1
YCR024C-A	1.16327	1	1	1	1	1	1	1	1	1	1	1	1	1	1
YCR024C-B	1.14286	1	1	1	1	1	1	1	1	1	1	1	1	1	1
YCR026C	1.18367	1	1	2	1	1	1	1	1	1	1	1	1	1	1
YCR027C	1.18367	1	1	1	1	1	1	1	1	1	1	1	1	1	1
YCR028C	1.36735	1	1	1	1	1	1	1	1	1	1	1	1	1	1
YCR028C-A	1.36735	1	1	1	1	1	1	1	1	1	1	1	1	1	1
YCR030C	1.28571	1	1	1	1	1	1	1	1	1	1	1	1	1	1
YCR031C	1.34694	1	1	1	1	1	1	1	1	1	1	1	1	1	1
YCR032W	1.20408	1	1	1	1	1	1	1	1	1	1	1	1	1	1
YCR033W	1.12245	1	1	1	1	1	1	1	1	1	1	1	1	1	1
YCR034W	1.04082	1	1	1	1	2	1	1	1	1	1	1	1	1	1
YCR035C	1.08163	1	1	1	1	2	1	1	1	1	1	1	1	1	1
YCR036W	1.08163	1	1	1	1	2	1	1	1	1	1	1	1	1	1
YCR037C	1.02041	1	1	1	1	2	1	1	1	1	1	1	1	1	1
YCR038C	0.95918	1	1	1	1	1	1	1	1	1	1	1	1	1	1
YCR039C	1	1	1	1	1	2	1	1	1	1	1	2	1	2	1
YCR040W	0.06122	0	0	0	0	0	0	0	0	0	0	0	0	0	0	Del:all
YCR042C	0.95918	1	1	1	1	2	1	1	1	1	1	1	1	1	1
YCR043C	0.79592	1	1	1	1	2	1	1	1	1	1	2	1	1	1
YCR044C	0.77551	1	1	1	1	1	1	1	1	1	1	1	1	1	1
YCR045C	0.85714	1	1	1	1	1	1	1	1	1	1	1	1	1	1
YCR046C	0.83673	1	1	1	1	1	1	1	1	1	1	1	1	1	1
YCR047C	0.85714	1	1	1	1	1	1	1	1	1	1	1	1	1	1
YCR048W	0.85714	1	1	1	1	1	1	1	1	1	1	1	1	1	1
YCR050C	0.81633	1	1	1	1	1	1	1	1	1	1	1	1	1	1
YCR051W	0.73469	1	1	1	1	1	1	1	1	1	1	1	1	1	1
YCR052W	0.7551	1	1	1	1	1	1	1	1	1	1	1	1	1	1
YCR053W	0.77551	1	1	1	1	1	1	1	1	1	1	1	1	1	1
YCR054C	0.81633	1	1	1	1	1	1	1	1	1	1	1	1	1	1
YCR057C	0.89796	1	1	1	1	1	1	1	1	2	1	1	1	1	1
YCR059C	0.91837	1	1	1	1	1	1	1	1	2	1	1	1	1	1
YCR060W	0.91837	1	1	1	1	1	1	1	1	1	1	1	1	1	1
YCR061W	0.95918	1	1	1	1	1	1	1	1	2	1	1	1	1	1
YCR063W	1.02041	1	1	1	1	1	1	1	1	2	1	1	1	1	1
YCR065W	1.10204	1	1	1	1	1	1	1	1	2	1	1	1	1	1
YCR066W	1.12245	1	1	1	1	1	1	1	1	2	1	1	1	1	1
YCR067C	1.14286	1	1	1	1	1	1	1	1	2	1	1	1	1	1
YCR068W	1.14286	1	1	1	1	1	1	1	1	2	1	1	1	1	1
YCR069W	1.20408	1	1	1	1	1	1	1	1	2	1	1	1	1	1
YCR071C	1.2449	1	1	1	1	1	1	1	1	2	1	1	1	1	1
YCR072C	1.20408	1	1	1	1	1	1	1	1	2	1	1	1	1	1
YCR073C	1.18367	1	1	2	1	1	1	1	1	2	1	1	1	1	1
YCR073W-A	1.14286	1	1	1	1	1	1	1	1	2	1	1	1	1	1
YCR075C	1.14286	1	1	1	1	1	1	1	1	2	1	1	1	1	1
YCR075W-A	1.14286	1	1	1	1	1	1	1	1	2	1	1	1	1	1
YCR076C	1.12245	1	1	2	1	1	1	1	1	2	1	1	1	1	1
YCR077C	1.14286	1	1	1	1	1	1	1	1	2	1	1	1	1	1
YCR079W	1.16327	1	1	1	1	1	1	1	1	1	1	1	1	1	1
YCR081W	0.95918	1	1	1	1	1	1	1	1	2	1	1	1	1	1
YCR082W	0.93878	1	1	1	1	1	1	1	1	1	1	1	1	1	1
YCR083W	0.89796	1	1	1	1	1	1	1	1	1	1	1	1	1	1
YCR084C	0.91837	1	1	1	1	1	1	1	1	1	1	1	1	1	1
YCR086W	0.95918	1	1	1	1	1	1	1	1	2	1	1	1	1	1
YCR087C-A	0.91837	1	1	1	1	1	1	1	1	2	1	1	1	1	1
YCR088W	0.85714	1	1	1	1	1	1	1	1	2	1	1	1	1	1
YCR089W	0.81633	1	1	1	1	1	1	1	1	1	1	1	1	1	1
YCR090C	0.73469	1	1	1	1	1	1	1	1	2	1	1	1	1	1
YCR091W	0.63265	1	1	1	1	1	1	1	1	2	1	1	1	1	1
YCR092C	0.61224	1	1	1	1	2	1	1	1	1	1	1	1	1	1
YCR093W	0.61224	1	1	1	1	2	1	1	1	2	1	1	1	1	1
YCR094W	0.67347	1	1	1	1	2	1	1	1	2	1	1	1	1	1
YCR095C	0.7551	1	1	1	1	2	1	1	1	2	1	1	1	1	1
YCR095W-A	0.73469	1	1	1	1	2	1	1	1	2	1	1	1	1	1
YCR096C	0.65306	1	1	1	1	2	1	1	1	2	1	1	1	1	1
YCR097W	0.61224	1	1	1	1	2	1	1	1	2	1	1	1	1	1
YCR098C	0.55102	1	1	1	1	2	1	1	1	1	1	1	1	1	1
YCR099C	0.63265	1	1	1	1	1	1	2	1	2	1	1	1	1	1	TEL03R
YCR100C	0.61224	1	1	1	1	1	1	2	1	2	1	1	1	1	1	TEL03R
YCR101C	0.61224	1	1	1	1	1	1	2	1	2	1	1	1	1	1	TEL03R
YCR102C	0.59184	1	1	1	1	1	1	2	1	2	1	1	1	1	1	TEL03R
YCR104W	0.65306	1	1	1	1	1	1	2	1	1	1	1	1	1	1	TEL03R
YCR105W	0.67347	1	1	1	1	1	1	2	1	2	1	1	1	1	1	TEL03R
YCR106W	0.63265	1	1	1	1	1	1	2	1	2	1	1	1	1	1	TEL03R
YCR107W	0.65306	1	1	1	1	1	1	2	1	2	1	1	1	1	1	TEL03R
YCR108C	0.61224	1	1	1	1	1	1	2	1	2	1	1	1	1	1	TEL03R
YDL001W	1.04082	1	1	1	1	1	1	1	1	1	1	1	1	1	1
YDL002C	1	1	1	1	1	1	1	1	1	1	1	1	1	1	1
YDL003W	1.04082	1	1	1	1	1	1	1	1	1	1	1	1	1	1
YDL004W	1	1	1	1	1	1	1	1	1	1	1	1	1	1	1
YDL005C	1	1	1	1	1	1	1	1	1	2	1	1	1	1	1
YDL006W	1.02041	1	1	1	1	1	1	1	1	2	1	1	1	1	1
YDL007C-A	1.06122	1	1	1	1	1	1	1	1	1	1	1	1	1	1
YDL007W	1.08163	1	1	1	1	1	1	1	1	2	1	1	1	1	1
YDL008W	0.91837	1	1	1	1	1	1	1	1	1	1	1	1	1	1
YDL009C	0.93878	1	1	1	1	1	1	1	1	1	1	1	1	1	1
YDL010W	0.95918	1	1	1	1	1	1	1	1	1	1	1	1	1	1
YDL012C	0.97959	1	1	1	1	1	1	1	1	1	1	1	1	1	1
YDL013W	0.87755	1	1	1	1	1	1	1	1	1	1	1	1	1	1
YDL014W	0.87755	1	1	1	1	1	1	1	1	1	1	1	1	1	1
YDL015C	0.85714	1	1	1	1	1	1	1	1	1	1	1	1	1	1
YDL017W	0.89796	1	1	1	1	1	1	1	1	1	1	1	1	1	1
YDL018C	0.95918	1	1	1	1	1	1	1	1	1	1	1	1	1	1
YDL019C	0.93878	1	1	1	1	1	1	1	1	1	1	1	1	1	1
YDL020C	0.93878	1	1	1	1	1	1	1	1	1	1	1	1	1	1
YDL021W	1	1	1	1	1	1	1	1	1	1	1	1	1	1	1
YDL022C-A	1.12245	1	1	1	1	1	1	1	1	1	1	1	1	1	1
YDL022W	1.04082	1	1	1	1	1	1	1	1	1	1	1	1	1	1
YDL024C	1.10204	1	1	1	1	1	1	1	1	1	1	1	1	1	1
YDL025C	1.10204	1	1	1	1	1	1	1	1	1	1	1	1	1	1
YDL027C	1.08163	1	1	1	1	1	1	1	1	1	1	1	1	1	1
YDL028C	1.10204	1	1	1	1	1	1	1	1	1	1	1	1	1	1
YDL029W	1.12245	1	1	1	1	1	1	1	1	1	1	1	1	1	1
YDL030W	1.12245	1	1	1	1	1	1	1	1	1	1	1	1	1	1
YDL031W	1.20408	1	1	1	1	1	1	1	1	1	1	1	1	1	1
YDL033C	1.22449	1	1	1	1	1	1	1	1	1	1	1	1	1	1
YDL035C	1.30612	1	1	1	1	1	1	1	1	1	1	1	1	1	1
YDL036C	1.40816	1	1	1	1	1	1	1	1	1	1	1	1	1	1
YDL037C	1.2449	1	1	1	1	1	1	1	1	1	1	1	1	1	1
YDL039C	1.22449	1	1	1	1	1	1	1	1	1	1	1	1	1	1
YDL040C	1.14286	1	1	1	1	1	1	1	1	1	1	1	1	1	1
YDL042C	1.10204	1	1	1	1	1	1	1	1	1	1	1	1	1	1
YDL043C	1.08163	1	1	1	1	1	1	1	1	1	1	1	1	1	1
YDL044C	1.02041	1	1	2	1	1	1	1	1	1	1	1	1	1	1
YDL045C	1.06122	1	1	2	1	1	1	1	1	1	1	1	1	1	1
YDL045W-A	1.06122	1	1	2	1	1	1	1	1	1	1	1	1	1	1
YDL046W	1.10204	1	1	1	1	1	1	1	1	1	1	1	1	1	1
YDL047W	1.12245	1	1	1	1	1	1	1	1	1	1	1	1	1	1
YDL048C	1.10204	1	1	1	1	1	1	1	1	1	1	1	1	1	1
YDL049C	1.12245	1	1	1	1	1	1	1	1	1	1	1	1	1	1
YDL051W	1.06122	1	1	2	1	1	1	1	1	1	1	1	1	1	1
YDL052C	1.06122	1	1	2	1	1	1	1	1	1	1	1	1	1	1
YDL053C	1.02041	1	1	2	1	1	1	1	1	1	1	1	1	1	1
YDL054C	1.08163	1	1	2	1	1	1	1	1	1	1	1	1	1	1
YDL055C	1.02041	1	1	2	1	1	1	1	1	1	1	1	1	1	1
YDL056W	1	1	1	2	1	1	1	1	1	1	1	1	1	1	1
YDL057W	1	1	1	2	1	1	1	1	1	1	1	1	1	1	1
YDL058W	0.95918	1	1	1	1	1	1	1	1	1	1	1	1	1	1
YDL059C	1.02041	1	1	1	1	1	1	1	1	1	1	1	1	1	1
YDL060W	1	1	1	1	1	1	1	1	1	1	1	1	1	1	1
YDL061C	0.95918	1	1	1	1	1	1	1	1	1	1	1	1	1	1
YDL063C	0.97959	1	1	1	1	1	1	1	1	1	1	1	1	1	1
YDL064W	0.97959	1	1	1	1	1	1	1	1	1	1	1	1	1	1
YDL065C	1.04082	1	1	1	1	1	1	1	1	1	1	1	1	1	1
YDL066W	1.08163	1	1	1	1	1	1	1	1	1	1	1	1	1	1
YDL067C	1	1	1	1	1	1	1	1	1	1	1	1	1	1	1
YDL069C	0.95918	1	1	1	1	1	1	1	1	1	1	1	1	1	1
YDL070W	0.95918	1	1	1	1	1	1	1	1	1	1	1	1	1	1
YDL072C	0.95918	1	1	1	1	1	1	1	1	1	1	1	1	1	1
YDL073W	0.97959	1	1	1	1	1	1	1	1	1	1	1	1	1	1
YDL074C	0.97959	1	1	1	1	1	1	1	1	1	1	1	1	1	1
YDL075W	1	1	1	1	1	1	1	1	1	1	1	1	1	1	1
YDL076C	0.91837	1	1	1	1	1	1	1	1	1	1	1	1	1	1
YDL077C	1	1	1	1	1	1	1	1	1	1	1	1	1	1	1
YDL078C	1	1	1	1	1	1	1	1	1	1	1	1	1	1	1
YDL079C	0.95918	1	1	1	1	1	1	1	1	1	1	1	1	1	1
YDL080C	0.97959	1	1	1	1	1	1	1	1	1	1	1	1	1	1
YDL081C	1.04082	1	1	1	1	1	1	1	1	1	1	1	1	1	1
YDL082W	1.08163	1	1	1	1	1	1	1	1	1	1	1	1	1	1
YDL083C	1.12245	1	1	1	1	1	1	1	1	1	1	1	1	1	1
YDL084W	1.10204	1	1	1	1	1	1	1	1	1	1	1	1	1	1
YDL085C-A	1	1	1	1	1	1	1	1	1	1	1	1	1	1	1
YDL085W	1.04082	1	1	1	1	1	1	1	1	1	1	1	1	1	1
YDL086W	1	1	1	1	1	1	1	1	1	1	1	1	1	1	1
YDL087C	1.10204	1	1	1	1	1	1	1	1	1	1	1	1	1	1
YDL088C	1.18367	1	1	1	1	1	1	1	1	1	1	1	1	1	1
YDL089W	1.12245	1	1	1	1	1	1	1	1	1	1	1	1	1	1
YDL090C	1.14286	1	1	1	1	2	1	1	1	1	1	1	1	1	1
YDL091C	1.10204	1	1	1	1	2	1	1	1	1	1	1	1	1	1
YDL092W	1.14286	1	1	1	1	1	1	1	1	1	1	1	1	1	1
YDL093W	1.14286	1	1	1	1	1	1	1	1	1	1	1	1	1	1
YDL095W	1.10204	1	1	1	1	1	1	1	1	1	1	1	1	1	1
YDL097C	1.12245	1	1	1	1	1	1	1	1	1	1	1	1	1	1
YDL098C	1.12245	1	1	1	1	1	1	1	1	1	1	1	1	1	1
YDL099W	1.08163	1	1	1	1	1	1	1	1	1	1	1	1	1	1
YDL100C	1.06122	1	1	1	1	1	1	1	1	0	1	1	1	1	1	False_DEL:DGY1736
YDL101C	1.04082	1	1	1	1	1	1	1	1	1	1	1	1	1	1
YDL102W	1	1	1	1	1	1	1	1	1	1	1	1	1	1	1
YDL103C	1.04082	1	1	1	1	1	1	1	1	1	1	1	1	1	1
YDL104C	1.04082	1	1	1	1	1	1	1	1	1	1	1	1	1	1
YDL105W	1.08163	1	1	1	1	1	1	1	1	0	1	1	1	1	1	False_DEL:DGY1736
YDL106C	1.12245	1	1	1	1	1	1	1	1	0	1	1	1	1	1	False_DEL:DGY1736
YDL107W	1.16327	1	1	1	1	1	1	1	1	0	1	1	1	1	1	False_DEL:DGY1736
YDL108W	1.2449	1	1	1	1	1	1	1	1	1	1	1	1	1	1
YDL109C	1.30612	1	1	1	1	1	1	1	1	0	1	1	1	1	1	False_DEL:DGY1736
YDL110C	1.28571	1	1	1	1	1	1	1	1	1	1	1	1	1	1
YDL111C	1.30612	1	1	1	1	1	1	1	1	1	1	1	1	1	1
YDL112W	1.32653	1	1	1	1	1	1	1	1	1	1	1	1	1	1
YDL113C	1.34694	1	1	1	1	1	1	1	1	1	1	1	1	1	1
YDL114W	1.32653	1	1	1	1	1	1	1	1	1	1	1	1	1	1
YDL115C	1.32653	1	1	1	1	1	1	1	1	0	1	1	1	1	1	False_DEL:DGY1736
YDL116W	1.5102	0.5	1	0.5	1	0.5	1	0.5	1	0.5	1	0.5	1	0.5	1
YDL117W	1.46939	1	1	1	1	1	1	1	1	1	1	1	1	1	1
YDL119C	1.36735	1	1	1	1	1	1	1	1	1	1	1	1	1	1
YDL120W	1.32653	1	1	1	1	1	1	1	1	1	1	1	1	1	1
YDL121C	1.30612	1	1	1	1	1	1	1	1	1	1	1	1	1	1
YDL122W	1.30612	1	1	1	1	1	1	1	1	1	1	1	1	1	1
YDL123W	1.40816	1	1	1	1	1	1	1	1	1	1	1	1	1	1
YDL124W	1.38776	1	1	1	1	1	1	1	1	1	1	1	1	1	1
YDL125C	1.36735	1	1	1	1	1	1	1	1	1	1	1	1	1	1
YDL126C	1.32653	1	1	1	1	1	1	1	1	1	1	1	1	1	1
YDL127W	1.2449	1	1	1	1	1	1	1	1	1	1	1	1	1	1
YDL128W	1.12245	1	1	1	1	1	1	1	1	1	1	1	1	1	1
YDL129W	1.16327	1	1	1	1	1	1	1	1	1	1	1	1	1	1
YDL130W	1.12245	1	1	1	1	1	1	1	1	1	1	1	1	1	1
YDL130W-A	1.04082	1	1	1	1	1	1	1	1	1	1	1	1	1	1
YDL131W	1.10204	1	1	1	1	1	1	1	1	1	1	1	1	1	1
YDL132W	1.22449	1	1	1	1	1	1	1	1	1	1	1	1	1	1
YDL133C-A	1.20408	1	1	1	1	1	1	1	1	1	1	1	1	1	1
YDL133W	1.18367	1	1	1	1	2	1	1	1	1	1	1	1	1	1
YDL134C	1.20408	1	1	1	1	1	1	1	1	1	1	1	1	1	1
YDL135C	1.22449	1	1	1	1	1	1	1	1	1	1	1	1	1	1
YDL136W	1.26531	1	1	1	1	1	1	1	1	1	1	1	1	1	1
YDL137W	1.22449	1	1	1	1	1	1	1	1	1	1	1	1	1	1
YDL138W	1.18367	1	1	1	1	1	1	1	1	1	1	1	1	1	1
YDL139C	1.36735	1	1	1	1	1	1	1	1	1	1	1	1	1	1
YDL140C	1.30612	1	1	1	1	1	1	1	1	1	1	1	1	1	1
YDL141W	1.32653	1	1	1	1	1	1	1	1	1	1	1	1	1	1
YDL142C	1.18367	1	1	2	1	1	1	1	1	1	1	1	1	1	1
YDL143W	1.22449	1	1	2	1	1	1	1	1	1	1	1	1	1	1
YDL144C	1.26531	1	1	1	1	1	1	1	1	1	1	1	1	1	1
YDL145C	1.30612	1	1	1	1	1	1	1	1	1	1	1	1	1	1
YDL146W	1.28571	1	1	1	1	1	1	1	1	1	1	1	1	1	1
YDL147W	1.26531	1	1	1	1	1	1	1	1	1	1	1	1	1	1
YDL148C	1.34694	1	1	1	1	1	1	1	1	1	1	1	1	1	1
YDL149W	1.2449	1	1	1	1	1	1	1	1	1	1	1	1	1	1
YDL150W	1.16327	1	1	1	1	1	1	1	1	1	1	1	1	1	1
YDL153C	1.14286	1	1	1	1	1	1	1	1	1	1	1	1	1	1
YDL154W	1.14286	1	1	1	1	1	1	1	1	1	1	1	1	1	1
YDL155W	1.12245	1	1	1	1	1	1	1	1	1	1	1	1	1	1
YDL156W	1.08163	1	1	1	1	1	1	1	1	1	1	1	1	1	1
YDL157C	1.02041	1	1	1	1	1	1	1	1	1	1	1	1	1	1
YDL159W	1.06122	1	1	1	1	1	1	1	1	0	1	1	1	1	1	False_DEL:DGY1736
YDL159W-A	1.06122	1	1	1	1	1	1	1	1	0	1	1	1	1	1	False_DEL:DGY1736
YDL160C	1.08163	1	1	1	1	1	1	1	1	0	1	1	1	1	1	False_DEL:DGY1736
YDL160C-A	1.14286	1	1	1	1	1	1	1	1	1	1	1	1	1	1
YDL161W	1.14286	1	1	1	1	1	1	1	1	0	1	1	1	1	1	False_DEL:DGY1736
YDL164C	1.12245	1	1	1	1	1	1	1	1	1	1	1	1	1	1
YDL165W	1.10204	1	1	1	1	1	1	1	1	1	1	1	1	1	1
YDL166C	1.16327	1	1	1	1	1	1	1	1	1	1	1	1	1	1
YDL167C	1.10204	1	1	1	1	1	1	1	1	1	1	1	1	1	1
YDL168W	1.02041	1	1	1	1	1	1	1	1	1	1	1	1	1	1
YDL169C	1.02041	1	1	1	1	1	1	1	1	1	1	1	1	1	1
YDL170W	1	1	1	1	1	1	1	1	1	1	1	1	1	1	1
YDL171C	0.97959	1	1	1	1	1	1	1	1	1	1	1	1	1	1
YDL173W	0.93878	1	1	1	1	1	1	1	1	1	1	1	1	1	1
YDL174C	0.97959	1	1	1	1	1	1	1	1	1	1	1	1	1	1
YDL175C	0.95918	1	1	1	1	1	1	1	1	1	1	1	1	1	1
YDL176W	0.97959	1	1	1	1	1	1	1	1	1	1	1	1	1	1
YDL177C	1.02041	1	1	1	1	1	1	1	1	1	1	1	1	1	1
YDL178W	1.06122	1	1	1	1	1	1	1	1	1	1	1	1	1	1
YDL179W	1.10204	1	1	1	1	1	1	1	1	1	1	1	1	1	1
YDL180W	1.06122	1	1	1	1	1	1	1	1	1	1	1	1	1	1
YDL181W	0.9898	1	1	2	1	1	1	1	1	1	1	1	1	1	1
YDL182W	1	1	1	1	1	1	1	1	1	1	1	1	1	1	1
YDL183C	1.08163	1	1	2	1	1	1	1	1	1	1	1	1	1	1
YDL184C	1.10204	1	1	1	1	1	1	1	1	1	1	1	1	1	1
YDL185W	1	1	1	1	1	1	1	1	1	1	1	1	1	1	1
YDL186W	0.97959	1	1	2	1	1	1	1	1	1	1	1	1	1	1
YDL188C	1	1	1	1	1	1	1	1	1	1	1	1	1	1	1
YDL189W	1	1	1	1	1	1	1	1	1	1	1	1	1	1	1
YDL190C	1.02041	1	1	1	1	1	1	1	1	1	1	1	1	1	1
YDL191W	1.02041	1	1	1	1	1	1	1	1	1	1	1	1	1	1
YDL192W	1.02041	1	1	1	1	1	1	1	1	1	1	1	1	1	1
YDL193W	0.95918	1	1	1	1	1	1	1	1	1	1	1	1	1	1
YDL194W	0.93878	1	1	1	1	1	1	1	1	1	1	1	1	1	1
YDL195W	0.93878	1	1	1	1	1	1	1	1	1	1	1	1	1	1
YDL197C	0.87755	1	1	1	1	1	1	1	1	1	1	1	1	1	1
YDL198C	0.81633	1	1	1	1	1	1	1	1	1	1	1	1	1	1
YDL199C	0.77551	1	1	1	1	1	1	1	1	1	1	1	1	1	1
YDL200C	0.79592	1	1	1	1	1	1	1	1	1	1	1	1	2	1
YDL201W	0.79592	1	1	1	1	1	1	1	1	1	1	1	1	1	1
YDL202W	0.81633	1	1	1	1	1	1	1	1	1	1	1	1	1	1
YDL203C	0.81633	1	1	1	1	1	1	1	1	1	1	1	1	1	1
YDL204W	0.93878	1	1	1	1	1	1	1	1	1	1	1	1	1	1
YDL205C	0.95918	1	1	1	1	1	1	1	1	1	1	1	1	1	1
YDL206W	0.91837	1	1	1	1	1	1	1	1	1	1	1	1	1	1
YDL207W	0.83673	1	1	1	1	1	1	1	1	1	1	1	1	1	1
YDL208W	0.81633	1	1	1	1	1	1	1	1	1	1	1	1	1	1
YDL209C	0.83673	1	1	1	1	1	1	1	1	1	1	1	1	1	1
YDL210W	0.83673	1	1	1	1	1	1	1	1	1	1	1	1	1	1
YDL211C	0.69388	1	1	1	1	1	1	1	1	1	1	1	1	1	1
YDL212W	0.7551	1	1	1	1	1	1	1	1	1	1	1	1	1	1
YDL213C	0.73469	1	1	1	1	1	1	1	1	1	1	1	1	1	1
YDL214C	0.73469	1	1	1	1	1	1	1	1	1	1	1	1	1	1
YDL215C	0.7551	1	1	1	1	1	1	1	1	1	1	1	1	1	1
YDL216C	0.77551	1	1	1	1	1	1	1	1	2	1	1	1	1	1
YDL217C	0.79592	1	1	1	1	1	1	1	1	2	1	1	1	1	1
YDL218W	0.85714	1	1	1	1	1	1	1	1	1	1	1	1	1	1
YDL219W	0.89796	1	1	1	1	1	1	1	1	1	1	1	1	1	1
YDL220C	0.87755	1	1	1	1	1	1	1	1	1	1	1	1	1	1
YDL222C	0.93878	1	1	1	1	1	1	1	1	1	1	1	1	1	1
YDL223C	1	1	1	1	1	2	1	1	1	1	1	1	1	1	1
YDL224C	1	1	1	1	1	1	1	1	1	1	1	1	1	1	1
YDL225W	1.02041	1	1	1	1	2	1	1	1	1	1	1	1	1	1
YDL226C	1	1	1	1	1	2	1	1	1	1	1	1	1	1	1
YDL227C	1	1	1	1	1	2	1	1	1	1	1	1	1	1	1
YDL229W	1.04082	1	1	1	1	2	1	1	1	1	1	1	1	1	1
YDL230W	0.93878	1	1	1	1	2	1	1	1	1	1	1	1	1	1
YDL231C	0.87755	1	1	1	1	1	1	1	1	1	1	1	1	1	1
YDL232W	0.81633	1	1	1	1	1	1	1	1	1	1	1	1	1	1
YDL233W	0.83673	1	1	1	1	1	1	1	1	1	1	1	1	1	1
YDL234C	0.79592	1	1	1	1	1	1	1	1	1	1	1	1	1	1
YDL235C	0.77551	1	1	1	1	1	1	1	1	1	1	1	1	1	1
YDL236W	0.83673	1	1	1	1	1	1	1	1	1	1	1	1	1	1
YDL237W	0.77551	1	1	1	1	1	1	1	1	1	1	1	1	1	1
YDL238C	0.77551	1	1	1	1	1	1	1	1	1	1	1	1	1	1
YDL239C	0.7551	1	1	1	1	1	1	1	1	1	1	1	1	1	1
YDL240W	0.77551	1	1	2	1	2	1	1	1	1	1	1	1	1	1
YDL241W	0.73469	1	1	1	1	1	1	1	1	1	1	1	1	1	1
YDL243C	0.81633	1	1	1	1	1	1	1	1	1	1	1	1	1	1
YDL244W	0.85714	1	1	1	1	1	1	1	1	1	1	1	1	1	1
YDL245C	0.87755	1	1	2	1	2	1	2	1	2	1	1	1	2	1	TEL04L
YDL246C	0.95918	1	1	2	1	2	1	2	1	2	1	1	1	2	1	TEL04L
YDL247W	0.97959	1	1	2	1	2	1	2	1	2	1	1	1	2	1	TEL04L
YDL248W	1.06122	1	1	2	1	2	1	2	1	3	1	1	1	2	1	TEL04L
YDR001C	1.08163	1	1	1	1	1	1	1	1	1	1	1	1	1	1
YDR002W	1.10204	1	1	1	1	1	1	1	1	1	1	1	1	1	1
YDR003W	1.06122	1	1	1	1	1	1	1	1	1	1	1	1	1	1
YDR003W-A	1.06122	1	1	1	1	1	1	1	1	1	1	1	1	1	1
YDR004W	1.10204	1	1	1	1	1	1	1	1	1	1	1	1	1	1
YDR005C	1.06122	1	1	1	1	1	1	1	1	1	1	1	1	1	1
YDR006C	1.04082	1	1	1	1	1	1	1	1	1	1	1	1	1	1
YDR007W	1.08163	1	1	1	1	1	1	1	1	1	1	1	1	1	1
YDR009W	1.02041	1	1	1	1	1	1	1	1	1	1	1	1	1	1
YDR011W	1.04082	1	1	1	1	1	1	1	1	1	1	1	1	1	1
YDR012W	1.06122	1	1	1	1	1	1	1	1	2	1	1	1	1	1
YDR013W	1.06122	1	1	1	1	1	1	1	1	2	1	1	1	1	1
YDR014W	1.10204	1	1	1	1	1	1	1	1	2	1	1	1	1	1
YDR014W-A	1.12245	1	1	1	1	1	1	1	1	1	1	1	1	1	1
YDR016C	1.10204	1	1	1	1	1	1	1	1	1	1	1	1	1	1
YDR017C	1.12245	1	1	1	1	1	1	1	1	1	1	1	1	1	1
YDR018C	1.12245	1	1	1	1	1	1	1	1	1	1	1	1	1	1
YDR019C	1.12245	1	1	1	1	1	1	1	1	1	1	1	1	1	1
YDR020C	1.08163	1	1	1	1	1	1	1	1	1	1	1	1	1	1
YDR021W	1.12245	1	1	1	1	1	1	1	1	1	1	1	1	1	1
YDR022C	1.14286	1	1	1	1	1	1	1	1	1	1	1	1	1	1
YDR023W	1.2449	1	1	1	1	1	1	1	1	1	1	1	1	1	1
YDR025W	1.18367	1	1	1	1	1	1	1	1	1	1	1	1	1	1
YDR026C	1.16327	1	1	1	1	1	1	1	1	1	1	1	1	1	1
YDR027C	1.20408	1	1	1	1	1	1	1	1	1	1	1	1	1	1
YDR028C	1.16327	1	1	2	1	1	1	1	1	1	1	1	1	1	1
YDR030C	1.28571	1	1	1	1	1	1	1	1	1	1	1	1	1	1
YDR031W	1.34694	1	1	1	1	1	1	1	1	1	1	1	1	1	1
YDR032C	1.36735	1	1	2	1	1	1	1	1	1	1	1	1	1	1
YDR033W	1.42857	1	1	1	1	1	1	1	1	1	1	1	1	1	1
YDR034C	1.28571	1	1	2	1	1	1	1	1	1	1	1	1	1	1
YDR034C-A	1.28571	1	1	1	1	1	1	1	1	1	1	1	1	1	1
YDR034C-C	1.36735	2	1	3	1	1	1	2	1	1	1	1	1	3	1	TEL04L
YDR034C-D	1.40816	1	1	2	1	1	1	2	1	1	1	1	1	2	1	TEL04L
YDR034W-B	1.14286	1	1	1	1	1	1	1	1	1	1	1	1	1	1
YDR035W	1.10204	1	1	1	1	1	1	1	1	1	1	1	1	1	1
YDR036C	1.04082	1	1	1	1	1	1	1	1	2	1	1	1	1	1
YDR037W	0.97959	1	1	2	1	1	1	1	1	2	1	1	1	1	1
YDR038C	1.79592	1	1	1.5	1	0.5	1	1	1	1	1	1	1	1	1	ENA-locua	*
YDR039C	1.85714	1.5	1	1.5	1	1	1	1.5	1.5	1	1	1	1	1	1	ENA-locus
YDR040C	1.79592	1	1	1.5	1	1	1	1	1	1	1	1	1	1	1	ENA-locua	*
YDR041W	1.02041	1	1	1	1	1	1	1	1	2	1	1	1	1	1
YDR042C	0.97959	1	1	1	1	1	1	1	1	2	1	1	1	1	1
YDR043C	1.06122	1	1	1	1	1	1	1	1	2	1	1	1	1	1
YDR044W	1.04082	1	1	1	1	1	1	1	1	2	1	1	1	1	1
YDR045C	1.08163	1	1	1	1	1	1	1	1	2	1	1	1	1	1
YDR046C	1.02041	1	1	1	1	1	1	1	1	2	1	1	1	1	1
YDR047W	1.04082	1	1	1	1	1	1	1	1	2	1	1	1	1	1
YDR049W	1	1	1	1	1	2	1	1	1	2	1	1	1	1	1
YDR050C	0.95918	1	1	1	1	2	1	1	1	2	1	1	1	1	1
YDR051C	1.06122	1	1	1	1	2	1	1	1	2	1	1	1	1	1
YDR052C	1.08163	1	1	1	1	2	1	1	1	2	1	1	1	1	1
YDR054C	1	1	1	1	1	2	1	1	1	1	1	1	1	1	1
YDR055W	1.04082	1	1	1	1	1	1	1	1	1	1	1	1	1	1
YDR056C	1.02041	1	1	1	1	1	1	1	1	1	1	1	1	1	1
YDR057W	1.08163	1	1	1	1	1	1	1	1	2	1	1	1	1	1
YDR058C	1.12245	2	1	1	1	1	1	1	1	1	1	1	1	1	1
YDR059C	1.14286	1	1	1	1	1	1	1	1	1	1	1	1	1	1
YDR060W	1.18367	1	1	1	1	1	1	1	1	1	1	1	1	1	1
YDR061W	1.22449	1	1	1	1	1	1	1	1	1	1	1	1	1	1
YDR062W	1.14286	2	1	1	1	1	1	1	1	1	1	1	1	1	1
YDR063W	1.12245	1	1	1	1	1	1	1	1	1	1	1	1	1	1
YDR064W	1.08163	1	1	1	1	1	1	1	1	1	1	1	1	1	1
YDR065W	1.08163	1	1	1	1	1	1	1	1	1	1	1	1	1	1
YDR066C	1.04082	1	1	1	1	1	1	1	1	1	1	1	1	1	1
YDR067C	1.04082	1	1	1	1	1	1	1	1	1	1	1	1	1	1
YDR068W	1.10204	1	1	1	1	1	1	1	1	1	1	1	1	1	1
YDR069C	1.06122	1	1	1	1	1	1	1	1	1	1	1	1	1	1
YDR070C	1.02041	1	1	1	1	1	1	1	1	1	1	1	1	1	1
YDR071C	1.04082	1	1	1	1	1	1	1	1	1	1	1	1	1	1
YDR072C	1.04082	1	1	1	1	1	1	1	1	1	1	1	1	1	1
YDR073W	1.04082	1	1	1	1	1	1	1	1	1	1	1	1	1	1
YDR074W	0.97959	1	1	1	1	1	1	1	1	1	1	1	1	1	1
YDR075W	0.91837	1	1	1	1	1	1	1	1	1	1	1	1	1	1
YDR076W	0.95918	1	1	1	1	1	1	1	1	1	1	1	1	1	1
YDR077W	1.02041	1	1	1	1	1	1	1	1	1	1	1	1	1	1
YDR078C	0.97959	1	1	1	1	1	1	1	1	1	1	1	1	1	1
YDR079C-A	0.97959	1	1	1	1	1	1	1	1	1	1	1	1	1	1
YDR079W	0.97959	1	1	1	1	1	1	1	1	1	1	1	1	1	1
YDR080W	0.97959	1	1	1	1	1	1	1	1	1	1	1	1	1	1
YDR081C	1.02041	1	1	1	1	1	1	1	1	1	1	1	1	1	1
YDR082W	1	1	1	1	1	1	1	1	1	1	1	1	1	1	1
YDR083W	1	1	1	1	1	1	1	1	1	1	1	1	1	1	1
YDR084C	1.02041	1	1	1	1	1	1	1	1	1	1	1	1	1	1
YDR085C	0.97959	1	1	1	1	1	1	1	1	1	1	1	1	1	1
YDR086C	1	1	1	1	1	1	1	1	1	1	1	1	1	1	1
YDR087C	1.06122	1	1	1	1	1	1	1	1	1	1	1	1	1	1
YDR088C	1.04082	1	1	1	1	1	1	1	1	1	1	1	1	1	1
YDR089W	0.97959	1	1	1	1	1	1	1	1	1	1	1	1	1	1
YDR090C	0.95918	1	1	1	1	1	1	1	1	1	1	1	1	1	1
YDR091C	0.97959	1	1	1	1	1	1	1	1	1	1	1	1	1	1
YDR092W	1.06122	1	1	1	1	1	1	1	1	1	1	1	1	1	1
YDR093W	1.02041	1	1	1	1	1	1	1	1	2	1	1	1	1	1
YDR096W	1.02041	1	1	1	1	1	1	1	1	1	1	1	1	1	1
YDR097C	0.97959	1	1	1	1	1	1	1	1	1	1	1	1	1	1
YDR098C	0.89796	1	1	1	1	1	1	1	1	1	1	1	1	1	1
YDR098C-A	1.28571	2	1	2	1	2	1	3	1	3	1	2	1	3	1	ty
YDR098C-B	1.26531	2	1	2	1	2	1	3	1	3	1	2	1	3	1	ty
YDR099W	1	1	1	1	1	1	1	1	1	1	1	1	1	1	1
YDR100W	0.97959	1	1	1	1	1	1	1	1	1	1	1	1	1	1
YDR101C	1.02041	1	1	1	1	1	1	1	1	1	1	1	1	1	1
YDR103W	1.10204	1	1	1	1	1	1	1	1	1	1	1	1	1	1
YDR104C	1.16327	1	1	1	1	1	1	1	1	2	1	1	1	1	1
YDR105C	1.10204	1	1	1	1	1	1	1	1	2	1	1	1	1	1
YDR106W	1.06122	1	1	1	1	1	1	1	1	2	1	1	1	1	1
YDR107C	1	1	1	1	1	1	1	1	1	2	1	1	1	1	1
YDR108W	1	1	1	1	1	1	1	1	1	1	1	1	1	1	1
YDR109C	1.04082	1	1	1	1	1	1	1	1	1	1	1	1	1	1
YDR110W	1.08163	1	1	1	1	1	1	1	1	1	1	1	1	1	1
YDR111C	1.10204	1	1	1	1	1	1	1	1	1	1	1	1	1	1
YDR113C	1	1	1	1	1	1	1	1	1	1	1	1	1	1	1
YDR114C	0.93878	1	1	1	1	1	1	1	1	1	1	1	1	1	1
YDR115W	0.95918	1	1	1	1	1	1	1	1	1	1	1	1	1	1
YDR116C	0.97959	1	1	1	1	1	1	1	1	1	1	1	1	1	1
YDR117C	0.97959	1	1	1	1	1	1	1	1	1	1	1	1	1	1
YDR118W	0.95918	1	1	1	1	1	1	1	1	1	1	1	1	1	1
YDR119W	0.89796	1	1	1	1	1	1	1	1	1	1	1	1	1	1
YDR119W-A	0.87755	1	1	1	1	1	1	1	1	1	1	1	1	1	1
YDR120C	0.91837	1	1	1	1	1	1	1	1	1	1	1	1	1	1
YDR121W	0.83673	1	1	1	1	1	1	1	1	1	1	1	1	1	1
YDR122W	0.89796	1	1	1	1	1	1	1	1	1	1	1	1	1	1
YDR123C	0.87755	1	1	1	1	1	1	1	1	1	1	1	1	1	1
YDR124W	0.89796	1	1	1	1	1	1	1	1	1	1	1	1	1	1
YDR125C	0.89796	1	1	1	1	1	1	1	1	1	1	1	1	1	1
YDR126W	0.95918	1	1	1	1	1	1	1	1	1	1	1	1	1	1
YDR127W	0.93878	1	1	1	1	1	1	1	1	1	1	1	1	1	1
YDR128W	0.97959	1	1	1	1	1	1	1	1	2	1	1	1	1	1
YDR129C	0.97959	1	1	1	1	1	1	1	1	2	1	1	1	1	1
YDR130C	0.97959	1	1	1	1	1	1	1	1	2	1	1	1	1	1
YDR131C	1.02041	1	1	1	1	1	1	1	1	1	1	1	1	1	1
YDR132C	1.02041	1	1	1	1	1	1	1	1	1	1	1	1	1	1
YDR134C	0.93878	1	1	1	1	1	1	1	1	1	1	1	1	1	1
YDR135C	0.93878	1	1	1	1	1	1	1	1	2	1	1	1	1	1
YDR137W	1.06122	1	1	1	1	1	1	1	1	1	1	1	1	1	1
YDR138W	1.06122	1	1	1	1	1	1	1	1	2	1	1	1	1	1
YDR139C	1.04082	1	1	1	1	1	1	1	1	1	1	1	1	1	1
YDR140W	1.08163	1	1	1	1	1	1	1	1	1	1	1	1	1	1
YDR141C	1.04082	1	1	1	1	1	1	1	1	1	1	1	1	1	1
YDR142C	1.02041	1	1	1	1	1	1	1	1	1	1	1	1	1	1
YDR143C	0.97959	1	1	1	1	1	1	1	1	1	1	1	1	1	1
YDR144C	0.95918	1	1	1	1	1	1	1	1	1	1	1	1	1	1
YDR145W	0.83673	1	1	2	1	1	1	1	1	1	1	1	1	1	1
YDR146C	0.79592	1	1	1	1	1	1	1	1	1	1	1	1	1	1
YDR147W	0.77551	1	1	2	1	1	1	1	1	1	1	1	1	1	1
YDR148C	0.73469	1	1	1	1	1	1	1	1	1	1	1	1	1	1
YDR150W	0.81633	1	1	1	1	1	1	1	1	1	1	1	1	1	1
YDR151C	0.83673	1	1	1	1	1	1	1	1	1	1	1	1	1	1
YDR152W	0.85714	1	1	1	1	1	1	1	1	1	1	1	1	2	1
YDR153C	0.83673	1	1	1	1	1	1	1	1	1	1	1	1	1	1
YDR155C	0.79592	1	1	1	1	1	1	1	1	1	1	1	1	1	1
YDR156W	0.69388	1	1	1	1	1	1	1	1	1	1	1	1	1	1
YDR158W	0.7551	1	1	1	1	1	1	1	1	1	1	1	1	1	1
YDR159W	0.93878	1	1	1	1	1	1	1	1	1	1	1	1	1	1
YDR160W	1	1	1	1	1	1	1	1	1	1	1	1	1	1	1
YDR161W	1.14286	1	1	1	1	1	1	1	1	1	1	1	1	1	1
YDR162C	1.18367	1	1	1	1	1	1	1	1	1	1	1	1	1	1
YDR163W	1.17347	1	1	1	1	1	1	1	1	1	1	1	1	1	1
YDR164C	1.18367	1	1	1	1	1	1	1	1	1	1	1	1	1	1
YDR165W	1.16327	1	1	1	1	1	1	1	1	1	1	1	1	1	1
YDR166C	1.10204	1	1	1	1	1	1	1	1	1	1	1	1	1	1
YDR167W	1.08163	1	1	1	1	1	1	1	1	1	1	1	1	1	1
YDR168W	1.04082	1	1	1	1	1	1	1	1	1	1	1	1	1	1
YDR169C	1.04082	1	1	1	1	1	1	1	1	1	1	1	1	1	1
YDR169C-A	0.95918	1	1	1	1	1	1	1	1	1	1	1	1	1	1
YDR170C	0.89796	1	1	1	1	1	1	1	1	1	1	1	1	1	1
YDR170W-A	0.87755	1	1	1	1	1	1	1	1	1	1	1	1	1	1
YDR171W	0.77551	1	1	1	1	1	1	1	1	1	1	1	1	1	1
YDR172W	0.69388	1	1	1	1	1	1	1	1	1	1	1	1	1	1
YDR173C	0.53061	1	1	1	1	1	1	1	1	1	1	1	1	1	1
YDR174W	0.55102	1	1	1	1	1	1	1	1	1	1	1	1	1	1
YDR175C	0.57143	1	1	1	1	1	1	1	1	1	1	1	1	1	1
YDR176W	0.57143	1	1	1	1	1	1	1	1	1	1	1	1	1	1
YDR177W	0.67347	1	1	1	1	1	1	1	1	1	1	1	1	1	1
YDR178W	0.69388	1	1	1	1	1	1	1	1	1	1	1	1	1	1
YDR179C	0.71429	1	1	1	1	1	1	1	1	1	1	1	1	1	1
YDR179W-A	0.77551	1	1	1	1	1	1	1	1	1	1	1	1	1	1
YDR180W	0.87755	1	1	1	1	1	1	1	1	1	1	1	1	1	1
YDR181C	0.85714	1	1	1	1	1	1	1	1	1	1	1	1	1	1
YDR182W	0.85714	1	1	1	1	1	1	1	1	1	1	1	1	1	1
YDR182W-A	0.89796	1	1	1	1	1	1	1	1	1	1	1	1	1	1
YDR183W	0.93878	1	1	1	1	1	1	1	1	1	1	1	1	1	1
YDR184C	0.89796	1	1	1	1	1	1	1	1	1	1	1	1	1	1
YDR185C	0.89796	1	1	1	1	1	1	1	1	1	1	1	1	1	1
YDR186C	0.91837	1	1	1	1	1	1	1	1	1	1	1	1	1	1
YDR188W	1	1	1	1	1	1	1	1	1	1	1	1	1	1	1
YDR189W	1.04082	1	1	1	1	1	1	1	1	1	1	1	1	1	1
YDR190C	1	1	1	1	1	1	1	1	1	1	1	1	1	1	1
YDR191W	1.10204	1	1	1	1	1	1	1	1	1	1	1	1	1	1
YDR192C	1.08163	1	1	1	1	1	1	1	1	1	1	1	1	1	1
YDR194C	1.12245	1	1	1	1	1	1	1	1	1	1	1	1	1	1
YDR194W-A	1.16327	1	1	1	1	1	1	1	1	1	1	1	1	1	1
YDR195W	1.20408	1	1	1	1	1	1	1	1	1	1	1	1	1	1
YDR196C	1.16327	1	1	1	1	1	1	1	1	1	1	1	1	1	1
YDR197W	1.14286	1	1	1	1	1	1	1	1	1	1	1	1	1	1
YDR198C	1.14286	1	1	1	1	1	1	1	1	1	1	1	1	1	1
YDR200C	1.26531	1	1	1	1	1	1	1	1	2	1	1	1	1	1
YDR201W	1.28571	1	1	1	1	1	1	1	1	1	1	1	1	1	1
YDR202C	1.18367	1	1	1	1	1	1	1	1	1	1	1	1	1	1
YDR204W	1.08163	1	1	1	1	1	1	1	1	1	1	1	1	1	1
YDR205W	1.12245	1	1	1	1	1	1	1	1	1	1	1	1	1	1
YDR206W	1.14286	1	1	1	1	1	1	1	1	1	1	1	1	1	1
YDR207C	1.14286	1	1	1	1	1	1	1	1	1	1	1	1	1	1
YDR208W	1.20408	1	1	1	1	1	1	1	1	2	1	1	1	1	1
YDR210C-C	1.20408	1	1	1	1	2	1	2	1	2	1	2	1	2	1	ty
YDR210C-D	1.18367	1	1	1	1	2	1	2	1	2	1	2	1	2	1	ty
YDR210W	1.26531	1	1	1	1	1	1	1	1	1	1	1	1	1	1
YDR210W-A	1.30612	1	1	1	1	2	1	2	1	1	1	1	1	2	1	ty
YDR210W-B	1.22449	2	1	2	1	2	1	2	1	1	1	1	1	3	1	ty
YDR211W	1.12245	1	1	1	1	1	1	1	1	1	1	1	1	1	1
YDR212W	1.06122	1	1	1	1	1	1	1	1	1	1	1	1	1	1
YDR213W	1.04082	1	1	1	1	1	1	1	1	1	1	1	1	1	1
YDR214W	1	1	1	1	1	1	1	1	1	1	1	1	1	1	1
YDR216W	0.97959	1	1	1	1	1	1	1	1	1	1	1	1	1	1
YDR217C	0.93878	1	1	1	1	1	1	1	1	1	1	1	1	1	1
YDR218C	0.97959	1	1	1	1	1	1	1	1	1	1	1	1	1	1
YDR219C	0.85714	1	1	1	1	1	1	1	1	1	1	1	1	1	1
YDR221W	0.83673	1	1	1	1	1	1	1	1	1	1	1	1	1	1
YDR222W	0.85714	1	1	1	1	1	1	1	1	1	1	1	1	1	1
YDR223W	0.85714	1	1	1	1	1	1	1	1	1	1	1	1	1	1
YDR224C	0.91837	1	1	2	1	1	1	1	1	1	1	1	1	1	1
YDR225W	0.93878	1	1	2	1	1	1	1	1	1	1	1	1	1	1
YDR226W	0.93878	1	1	2	1	1	1	1	1	1	1	1	1	1	1
YDR227W	0.81633	1	1	1	1	1	1	1	1	1	1	1	1	1	1
YDR228C	0.87755	1	1	1	1	1	1	1	1	1	1	1	1	1	1
YDR229W	0.97959	1	1	1	1	1	1	1	1	1	1	1	1	1	1
YDR231C	0.97959	1	1	1	1	1	1	1	1	1	1	1	1	1	1
YDR232W	1.02041	1	1	1	1	1	1	1	1	1	1	1	1	1	1
YDR233C	1.10204	1	1	1	1	1	1	1	1	1	1	1	1	1	1
YDR234W	1.04082	1	1	1	1	1	1	1	1	1	1	1	1	1	1
YDR235W	1.06122	1	1	1	1	1	1	1	1	1	1	1	1	1	1
YDR236C	1.06122	1	1	1	1	1	1	1	1	1	1	1	1	1	1
YDR237W	1.06122	1	1	1	1	2	1	1	1	1	1	1	1	1	1
YDR238C	1.08163	1	1	1	1	1	1	1	1	1	1	1	1	1	1
YDR239C	1.04082	1	1	1	1	1	1	1	1	1	1	1	1	1	1
YDR240C	1.06122	1	1	1	1	1	1	1	1	1	1	1	1	1	1
YDR242W	1.16327	1	1	1	1	1	1	1	1	1	1	1	1	1	1
YDR243C	1.14286	1	1	1	1	1	1	1	1	1	1	1	1	1	1
YDR244W	1.28571	1	1	1	1	1	1	1	1	1	1	1	1	1	1
YDR245W	1.32653	1	1	2	1	1	1	1	1	1	1	1	1	1	1
YDR246W	1.26531	1	1	1	1	1	1	1	1	2	1	1	1	1	1
YDR246W-A	1.26531	1	1	1	1	1	1	1	1	2	1	1	1	1	1
YDR247W	1.20408	1	1	1	1	1	1	1	1	2	1	1	1	1	1
YDR248C	1.20408	1	1	1	1	1	1	1	1	1	1	1	1	1	1
YDR249C	1.22449	1	1	1	1	1	1	1	1	2	1	1	1	1	1
YDR251W	1.2449	1	1	1	1	1	1	1	1	1	1	1	1	1	1
YDR252W	1.2449	1	1	1	1	1	1	1	1	2	1	1	1	1	1
YDR253C	1.20408	1	1	1	1	1	1	1	1	2	1	1	1	1	1
YDR254W	1.2449	1	1	1	1	1	1	1	1	1	1	1	1	1	1
YDR255C	1.18367	1	1	1	1	1	1	1	1	1	1	1	1	1	1
YDR256C	1.18367	1	1	1	1	1	1	1	1	1	1	1	1	1	1
YDR257C	1.10204	1	1	1	1	1	1	1	1	1	1	1	1	1	1
YDR258C	1	1	1	1	1	1	1	1	1	1	1	1	1	1	1
YDR259C	1.08163	1	1	1	1	1	1	1	1	1	1	1	1	1	1
YDR260C	1.08163	1	1	2	1	1	1	1	1	1	1	1	1	1	1
YDR261C	1.08163	1	1	2	1	1	1	1	1	1	1	1	1	1	1
YDR261C-C	2.02041	1.5	1	3	1	1.5	1	4	1	2.5	1	2	1	1.5	1	ty
YDR261C-D	2.02041	1.5	1	2.5	1	1.5	1	4	1	2.5	1	1.5	1	2	1	ty
YDR261W-A	1.22449	2	1	2	1	1	1	2	1	2	1	1	1	2	1	ty
YDR261W-B	1.28571	2	1	2	1	1	1	2	1	2	1	1	1	2	1	ty
YDR262W	1.12245	1	1	1	1	1	1	1	1	1	1	1	1	1	1
YDR263C	1.14286	1	1	1	1	1	1	1	1	1	1	1	1	1	1
YDR264C	1.14286	1	1	1	1	1	1	1	1	1	1	1	1	1	1
YDR265W	1.04082	1	1	1	1	1	1	1	1	1	1	1	1	1	1
YDR266C	1.04082	1	1	1	1	1	1	1	1	1	1	1	1	1	1
YDR267C	0.95918	1	1	1	1	1	1	1	1	1	1	1	1	1	1
YDR268W	0.93878	1	1	1	1	1	1	1	1	1	1	1	1	1	1
YDR270W	0.95918	1	1	1	1	1	1	1	1	1	1	1	1	1	1
YDR272W	0.95918	1	1	1	1	1	1	1	1	1	1	1	1	1	1
YDR273W	0.93878	1	1	1	1	1	1	1	1	1	1	1	1	1	1
YDR275W	0.91837	1	1	1	1	1	1	1	1	1	1	1	1	1	1
YDR276C	0.91837	1	1	1	1	1	1	1	1	1	1	1	1	1	1
YDR277C	0.85714	1	1	1	1	1	1	1	1	1	1	1	1	1	1
YDR279W	0.83673	1	1	1	1	1	1	1	1	1	1	1	1	1	1
YDR280W	0.83673	1	1	1	1	1	1	1	1	1	1	1	1	1	1
YDR281C	0.85714	1	1	1	1	1	1	1	1	1	1	1	1	1	1
YDR282C	0.93878	1	1	1	1	1	1	1	1	1	1	1	1	1	1
YDR283C	1	1	1	1	1	1	1	1	1	1	1	1	1	1	1
YDR284C	1.10204	1	1	1	1	1	1	1	1	1	1	1	1	1	1
YDR285W	0.89796	1	1	1	1	1	1	1	1	2	1	1	1	1	1
YDR286C	0.85714	1	1	1	1	1	1	1	1	2	1	1	1	1	1
YDR287W	0.77551	1	1	1	1	1	1	1	1	2	1	1	1	1	1
YDR288W	0.7551	1	1	1	1	1	1	1	1	1	1	1	1	1	1
YDR289C	0.7551	1	1	1	1	1	1	1	1	1	1	1	1	1	1
YDR291W	0.77551	1	1	1	1	1	1	1	1	2	1	1	1	1	1
YDR292C	0.73469	1	1	1	1	1	1	1	1	2	1	1	1	1	1
YDR293C	0.83673	1	1	1	1	1	1	1	1	2	1	1	1	1	1
YDR294C	0.81633	1	1	1	1	1	1	1	1	1	1	1	1	1	1
YDR295C	0.91837	1	1	1	1	1	1	1	1	1	1	1	1	1	1
YDR296W	0.87755	1	1	1	1	1	1	1	1	1	1	1	1	1	1
YDR297W	0.81633	1	1	1	1	1	1	1	1	1	1	1	1	1	1
YDR298C	0.77551	1	1	1	1	1	1	1	1	1	1	1	1	1	1
YDR299W	0.77551	1	1	1	1	1	1	1	1	1	1	1	1	1	1
YDR300C	0.89796	1	1	1	1	1	1	1	1	1	1	1	1	1	1
YDR301W	0.89796	1	1	1	1	1	1	1	1	1	1	1	1	1	1
YDR302W	0.91837	1	1	1	1	1	1	1	1	1	1	1	1	1	1
YDR303C	0.97959	1	1	1	1	1	1	1	1	1	1	1	1	1	1
YDR304C	1.10204	1	1	1	1	1	1	1	1	1	1	1	1	1	1
YDR305C	1.14286	1	1	1	1	1	1	1	1	1	1	1	1	1	1
YDR306C	1.22449	1	1	1	1	1	1	1	1	1	1	1	1	1	1
YDR307W	1.20408	1	1	1	1	1	1	1	1	1	1	1	1	1	1
YDR308C	1.2449	1	1	1	1	1	1	1	1	1	1	1	1	1	1
YDR309C	1.28571	1	1	1	1	1	1	1	1	1	1	1	1	1	1
YDR310C	1.16327	1	1	1	1	1	1	1	1	1	1	1	1	1	1
YDR311W	1.10204	1	1	1	1	1	1	1	1	1	1	1	1	1	1
YDR312W	1.02041	1	1	1	1	1	1	1	1	1	1	1	1	1	1
YDR313C	0.97959	1	1	1	1	1	1	1	1	1	1	1	1	1	1
YDR314C	0.87755	1	1	1	1	1	1	1	1	1	1	1	1	1	1
YDR315C	0.89796	1	1	1	1	1	1	1	1	1	1	1	1	1	1
YDR316W	0.91837	1	1	1	1	1	1	1	1	1	1	1	1	1	1
YDR316W-A	2.18367	1	1	2.5	1	2	1	3	1	2.5	1	2	1	2	1	ty
YDR316W-B	2.26531	1.5	1	2.5	1	1.5	1	3	1	2.5	1	2	1	2.5	1	ty
YDR317W	0.97959	1	1	1	1	1	1	1	1	1	1	1	1	1	1
YDR318W	1.08163	1	1	1	1	1	1	1	1	1	1	1	1	1	1
YDR319C	1.08163	1	1	1	1	1	1	1	1	1	1	1	1	1	1
YDR320C	1.08163	1	1	1	1	1	1	1	1	1	1	1	1	1	1
YDR320C-A	1.06122	1	1	1	1	1	1	1	1	1	1	1	1	1	1
YDR321W	1.04082	1	1	1	1	1	1	1	1	1	1	1	1	1	1
YDR322C-A	1	1	1	1	1	1	1	1	1	2	1	1	1	1	1
YDR322W	1.02041	1	1	1	1	1	1	1	1	1	1	1	1	1	1
YDR323C	0.95918	1	1	1	1	1	1	1	1	2	1	1	1	1	1
YDR324C	0.93878	1	1	1	1	1	1	1	1	1	1	1	1	1	1
YDR325W	0.97959	1	1	1	1	1	1	1	1	1	1	1	1	1	1
YDR326C	1.02041	1	1	1	1	1	1	1	1	1	1	1	1	1	1
YDR328C	0.91837	1	1	1	1	1	1	1	1	1	1	1	1	1	1
YDR329C	0.87755	1	1	1	1	1	1	1	1	2	1	1	1	1	1
YDR330W	0.85714	1	1	1	1	1	1	1	1	2	1	1	1	1	1
YDR331W	0.85714	1	1	1	1	1	1	1	1	2	1	1	1	1	1
YDR332W	0.89796	1	1	1	1	1	1	1	1	2	1	1	1	1	1
YDR333C	0.83673	1	1	1	1	1	1	1	1	2	1	1	1	1	1
YDR334W	0.93878	1	1	1	1	1	1	1	1	2	1	1	1	1	1
YDR335W	0.91837	1	1	1	1	1	1	1	1	2	1	1	1	1	1
YDR336W	0.87755	1	1	1	1	1	1	1	1	2	1	1	1	1	1
YDR337W	0.91837	1	1	1	1	1	1	1	1	1	1	1	1	1	1
YDR338C	0.89796	1	1	1	1	1	1	1	1	1	1	1	1	1	1
YDR339C	0.83673	1	1	1	1	1	1	1	1	2	1	1	1	1	1
YDR341C	0.89796	1	1	1	1	1	1	1	1	1	1	1	1	1	1
YDR342C	0.83673	1	1	1	1	1	1	1	1	1	1	1	1	1	1
YDR343C	0.71429	1	1	1	1	1	1	1	1	1	1	1	1	1	1
YDR345C	0.71429	1	1	2	1	1	1	1	1	1	1	1	1	1	1
YDR346C	0.77551	1	1	1	1	1	1	1	1	1	1	1	1	1	1
YDR347W	0.71429	1	1	1	1	1	1	1	1	1	1	1	1	1	1
YDR348C	0.81633	1	1	1	1	1	1	1	1	1	1	1	1	1	1
YDR349C	0.83673	1	1	1	1	1	1	1	1	1	1	1	1	1	1
YDR350C	0.89796	1	1	1	1	1	1	1	1	2	1	1	1	1	1
YDR351W	0.93878	1	1	1	1	1	1	1	1	2	1	1	1	1	1
YDR352W	0.93878	1	1	1	1	1	1	1	1	1	1	1	1	1	1
YDR353W	0.97959	1	1	1	1	1	1	1	1	1	1	1	1	1	1
YDR354W	1	1	1	1	1	1	1	1	1	1	1	1	1	1	1
YDR356W	0.93878	1	1	1	1	1	1	1	1	1	1	1	1	1	1
YDR357C	0.89796	1	1	1	1	1	1	1	1	1	1	1	1	1	1
YDR358W	0.87755	1	1	1	1	1	1	1	1	1	1	1	1	1	1
YDR359C	0.89796	1	1	1	1	1	1	1	1	1	1	1	1	1	1
YDR361C	0.97959	1	1	1	1	1	1	1	1	1	1	1	1	1	1
YDR362C	0.93878	1	1	1	1	1	1	1	1	1	1	1	1	1	1
YDR363W	0.89796	1	1	1	1	1	1	1	1	1	1	1	1	1	1
YDR363W-A	0.85714	1	1	1	1	1	1	1	1	1	1	1	1	1	1
YDR364C	0.91837	1	1	1	1	1	1	1	1	1	1	1	1	1	1
YDR365C	0.87755	1	1	1	1	1	1	1	1	1	1	1	1	1	1
YDR365W-A	3.22449	1.33333	1	2.66667	1	1.66667	1	5.33333	1	2.66667	1	2.66667	1	2	1	ty
YDR365W-B	3.12245	1	1	2.66667	1	1.66667	1	5.66667	1	2.66667	1	2.66667	1	1.66667	1	ty
YDR366C	1.16327	1	1	2	1	1	1	1	1	1	1	1	1	1	1
YDR367W	1.14286	1	1	2	1	1	1	1	1	1	1	1	1	1	1
YDR368W	1.12245	1	1	2	1	1	1	1	1	1	1	1	1	1	1
YDR369C	1.18367	1	1	1	1	1	1	1	1	1	1	1	1	1	1
YDR370C	1.18367	1	1	1	1	1	1	1	1	1	1	1	1	1	1
YDR371W	1.16327	1	1	1	1	1	1	1	1	1	1	1	1	1	1
YDR372C	1.18367	1	1	1	1	1	1	1	1	1	1	1	1	1	1
YDR373W	1.18367	1	1	1	1	1	1	1	1	1	1	1	1	1	1
YDR374C	1.14286	1	1	1	1	1	1	1	1	1	1	1	1	1	1
YDR374W-A	1.18367	1	1	1	1	1	1	1	1	1	1	1	1	1	1
YDR375C	1.16327	1	1	1	1	1	1	1	1	1	1	1	1	1	1
YDR376W	1.08163	1	1	1	1	1	1	1	1	1	1	1	1	1	1
YDR377W	1.12245	1	1	1	1	1	1	1	1	1	1	1	1	1	1
YDR378C	1.12245	1	1	1	1	1	1	1	1	1	1	1	1	1	1
YDR379C-A	1.02041	1	1	1	1	1	1	1	1	1	1	1	1	1	1
YDR379W	1.08163	1	1	1	1	1	1	1	1	1	1	1	1	1	1
YDR380W	0.93878	1	1	1	1	1	1	1	1	1	1	1	1	1	1
YDR381C-A	0.87755	1	1	1	1	1	1	1	1	1	1	1	1	1	1
YDR381W	0.93878	1	1	1	1	1	1	1	1	1	1	1	1	1	1
YDR382W	0.83673	1	1	1	1	1	1	1	1	1	1	1	1	1	1
YDR383C	0.89796	1	1	1	1	1	1	1	1	1	1	1	1	1	1
YDR384C	0.89796	1	1	1	1	1	1	1	1	1	1	1	1	1	1
YDR385W	0.93878	1	1	1	1	1	1	1	1	1	1	1	1	1	1
YDR386W	0.83673	1	1	1	1	1	1	1	1	1	1	1	1	1	1
YDR387C	0.81633	1	1	1	1	1	1	1	1	1	1	1	1	1	1
YDR388W	0.81633	1	1	1	1	1	1	1	1	1	1	1	1	1	1
YDR389W	0.93878	1	1	1	1	1	1	1	1	1	1	1	1	1	1
YDR390C	0.95918	1	1	1	1	1	1	1	1	1	1	1	1	1	1
YDR391C	0.95918	1	1	1	1	1	1	1	1	1	1	1	1	1	1
YDR392W	0.95918	1	1	1	1	1	1	1	1	1	1	1	1	1	1
YDR393W	0.89796	1	1	1	1	1	1	1	1	1	1	1	1	1	1
YDR394W	0.89796	1	1	1	1	1	1	1	1	1	1	1	1	1	1
YDR395W	0.91837	1	1	1	1	1	1	1	1	1	1	1	1	1	1
YDR397C	0.93878	1	1	1	1	1	1	1	1	1	1	1	1	1	1
YDR398W	0.95918	1	1	1	1	1	1	1	1	1	1	1	1	1	1
YDR399W	0.93878	1	1	1	1	1	1	1	1	1	1	1	1	1	1
YDR400W	0.91837	1	1	1	1	1	1	1	1	1	1	1	1	1	1
YDR402C	0.89796	1	1	1	1	1	1	1	1	1	1	1	1	1	1
YDR403W	0.91837	1	1	2	1	1	1	1	1	1	1	1	1	1	1
YDR404C	0.95918	1	1	1	1	1	1	1	1	1	1	1	1	1	1
YDR405W	1.04082	1	1	1	1	1	1	1	1	1	1	1	1	1	1
YDR406W	1.06122	1	1	1	1	1	1	1	1	1	1	1	1	1	1
YDR407C	1.04082	1	1	1	1	1	1	1	1	1	1	1	1	1	1
YDR408C	1.04082	1	1	1	1	1	1	1	1	2	1	1	1	1	1
YDR409W	1.12245	1	1	1	1	1	1	1	1	1	1	1	1	1	1
YDR410C	1.08163	1	1	1	1	1	1	1	1	1	1	1	1	1	1
YDR411C	1.14286	1	1	1	1	1	1	1	1	1	1	1	1	1	1
YDR412W	1.14286	1	1	1	1	1	1	1	1	1	1	1	1	1	1
YDR414C	1.12245	1	1	1	1	1	1	1	1	1	1	1	1	1	1
YDR415C	1.18367	1	1	1	1	1	1	1	1	1	1	1	1	1	1
YDR416W	1.2449	1	1	1	1	1	1	1	1	1	1	1	1	1	1
YDR418W	1.18367	1	1	1	1	1	1	1	1	1	1	1	1	1	1
YDR419W	1.12245	1	1	1	1	1	1	1	1	1	1	1	1	1	1
YDR420W	1.14286	1	1	1	1	1	1	1	1	1	1	1	1	1	1
YDR421W	1.08163	1	1	1	1	1	1	1	1	1	1	1	1	1	1
YDR422C	1.06122	1	1	1	1	1	1	1	1	1	1	1	1	1	1
YDR423C	1.02041	1	1	1	1	1	1	1	1	1	1	1	1	1	1
YDR424C	1.04082	1	1	1	1	1	1	1	1	1	1	1	1	1	1
YDR425W	1.04082	1	1	1	1	1	1	1	1	1	1	1	1	1	1
YDR427W	1.06122	1	1	1	1	1	1	1	1	1	1	1	1	1	1
YDR428C	1.04082	1	1	1	1	1	1	1	1	1	1	1	1	1	1
YDR429C	1.04082	1	1	1	1	1	1	1	1	1	1	1	1	1	1
YDR430C	1.08163	1	1	1	1	1	1	1	1	1	1	1	1	1	1
YDR432W	1.14286	1	1	1	1	1	1	1	1	1	1	1	1	1	1
YDR434W	1.06122	1	1	1	1	1	1	1	1	1	1	1	1	1	1
YDR435C	1	1	1	1	1	1	1	1	1	1	1	1	1	1	1
YDR436W	1	2	1	1	1	1	1	1	1	1	1	1	1	1	1
YDR437W	1.02041	2	1	1	1	1	1	1	1	1	1	1	1	1	1
YDR438W	0.97959	2	1	1	1	1	1	1	1	1	1	1	1	1	1
YDR439W	0.91837	2	1	1	1	1	1	1	1	1	1	1	1	1	1
YDR440W	0.91837	1	1	1	1	1	1	1	1	1	1	1	1	1	1
YDR441C	0.87755	1	1	1	1	1	1	1	1	1	1	1	1	1	1
YDR443C	1	1	1	1	1	1	1	1	1	1	1	1	1	1	1
YDR444W	1.06122	2	1	1	1	1	1	1	1	1	1	1	1	1	1
YDR446W	1.10204	1	1	1	1	1	1	1	1	1	1	1	1	1	1
YDR447C	1.10204	1	1	1	1	1	1	1	1	1	1	1	1	1	1
YDR448W	1.08163	1	1	1	1	1	1	1	1	1	1	1	1	1	1
YDR449C	1.06122	1	1	1	1	1	1	1	1	1	1	1	1	1	1
YDR450W	0.97959	1	1	1	1	1	1	1	1	1	1	1	1	1	1
YDR451C	0.97959	1	1	1	1	1	1	1	1	1	1	1	1	1	1
YDR452W	1	1	1	1	1	1	1	1	1	1	1	1	1	1	1
YDR453C	1	1	1	1	1	1	1	1	1	1	1	1	1	1	1
YDR454C	1.04082	1	1	1	1	1	1	1	1	1	1	1	1	1	1
YDR456W	0.97959	1	1	1	1	1	1	1	1	1	1	1	1	1	1
YDR457W	0.93878	1	1	2	1	1	1	1	1	1	1	1	1	1	1
YDR458C	0.93878	1	1	2	1	1	1	1	1	1	1	1	1	1	1
YDR459C	0.97959	1	1	1	1	1	1	1	1	1	1	1	1	1	1
YDR460W	0.95918	1	1	1	1	1	1	1	1	2	1	1	1	1	1
YDR461C-A	0.89796	1	1	1	1	1	1	1	1	2	1	1	1	1	1
YDR461W	0.95918	1	1	1	1	1	1	1	1	2	1	1	1	1	1
YDR462W	0.89796	1	1	1	1	1	1	1	1	2	1	1	1	1	1
YDR463W	0.83673	1	1	1	1	1	1	1	1	2	1	1	1	1	1
YDR464W	0.83673	1	1	1	1	1	1	1	1	2	1	1	1	1	1
YDR465C	0.87755	1	1	1	1	1	1	1	1	2	1	1	1	1	1
YDR466W	0.93878	1	1	1	1	1	1	1	1	2	1	1	1	1	1
YDR468C	0.93878	1	1	1	1	1	1	1	1	2	1	1	1	1	1
YDR469W	0.95918	1	1	1	1	1	1	1	1	1	1	1	1	1	1
YDR470C	0.91837	1	1	1	1	1	1	1	1	1	1	1	1	1	1
YDR471W	0.89796	1	1	1	1	1	1	1	1	1	1	1	1	1	1
YDR472W	0.91837	1	1	1	1	1	1	1	1	1	1	1	1	1	1
YDR473C	0.87755	1	1	1	1	1	1	1	1	1	1	1	1	1	1
YDR475C	0.91837	1	1	1	1	1	1	1	1	1	1	1	1	1	1
YDR476C	0.93878	1	1	1	1	1	1	1	1	1	1	1	1	1	1
YDR477W	1	1	1	1	1	1	1	1	1	1	1	1	1	1	1
YDR478W	1.04082	1	1	1	1	1	1	1	1	1	1	1	1	1	1
YDR479C	0.95918	1	1	1	1	1	1	1	1	1	1	1	1	1	1
YDR480W	0.97959	1	1	1	1	1	1	1	1	1	1	1	1	1	1
YDR481C	0.93878	1	1	1	1	1	1	1	1	1	1	1	1	1	1
YDR482C	0.87755	1	1	1	1	1	1	1	1	1	1	1	1	1	1
YDR483W	0.91837	1	1	1	1	1	1	1	1	1	1	1	1	1	1
YDR484W	0.93878	1	1	1	1	1	1	1	1	1	1	1	1	1	1
YDR485C	0.97959	1	1	1	1	1	1	1	1	1	1	1	1	1	1
YDR486C	1.06122	1	1	1	1	1	1	1	1	1	1	1	1	1	1
YDR487C	1.04082	1	1	1	1	1	1	1	1	1	1	1	1	1	1
YDR488C	1.04082	1	1	1	1	1	1	1	1	1	1	1	1	1	1
YDR489W	1.02041	1	1	1	1	1	1	1	1	1	1	1	1	1	1
YDR490C	1.06122	1	1	1	1	1	1	1	1	1	1	1	1	1	1
YDR492W	1.10204	1	1	1	1	1	1	1	1	1	1	1	1	1	1
YDR493W	1.16327	1	1	1	1	1	1	1	1	1	1	1	1	1	1
YDR494W	1.16327	1	1	1	1	1	1	1	1	1	1	1	1	1	1
YDR495C	1.10204	1	1	1	1	1	1	1	1	1	1	1	1	1	1
YDR496C	1.10204	1	1	1	1	1	1	1	1	1	1	1	1	1	1
YDR497C	1.08163	1	1	1	1	1	1	1	1	1	1	1	1	1	1
YDR498C	1.10204	1	1	1	1	1	1	1	1	2	1	1	1	1	1
YDR499W	1.10204	1	1	1	1	1	1	1	1	1	1	1	1	1	1
YDR500C	1.14286	1	1	1	1	1	1	1	1	1	1	1	1	1	1
YDR501W	1.08163	1	1	1	1	1	1	1	1	1	1	1	1	1	1
YDR502C	1.10204	1	1	1	1	1	1	1	1	1	1	1	1	1	1
YDR503C	1.10204	1	1	1	1	1	1	1	1	1	1	1	1	1	1
YDR504C	1.06122	1	1	1	1	1	1	1	1	1	1	1	1	1	1
YDR505C	1	1	1	1	1	1	1	1	1	1	1	1	1	1	1
YDR506C	1.02041	1	1	1	1	1	1	1	1	1	1	1	1	1	1
YDR507C	0.91837	1	1	1	1	1	1	1	1	1	1	1	1	1	1
YDR508C	0.91837	1	1	1	1	1	1	1	1	1	1	1	1	1	1
YDR510W	0.95918	1	1	1	1	1	1	1	1	1	1	1	1	1	1
YDR511W	0.93878	1	1	1	1	1	1	1	1	1	1	1	1	1	1
YDR512C	0.95918	1	1	1	1	1	1	1	1	1	1	1	1	1	1
YDR513W	0.93878	1	1	1	1	1	1	1	1	1	1	1	1	1	1
YDR514C	0.89796	1	1	1	1	1	1	1	1	1	1	1	1	1	1
YDR515W	0.95918	1	1	1	1	1	1	1	1	1	1	1	1	1	1
YDR516C	0.93878	1	1	1	1	1	1	1	1	1	1	1	1	1	1
YDR517W	0.89796	1	1	1	1	1	1	1	1	1	1	1	1	1	1
YDR518W	0.89796	1	1	1	1	1	1	1	1	1	1	1	1	1	1
YDR519W	0.95918	1	1	1	1	1	1	1	1	1	1	1	1	1	1
YDR520C	0.93878	1	1	2	1	1	1	1	1	1	1	1	1	1	1
YDR522C	0.85714	1	1	1	1	1	1	1	1	1	1	1	1	1	1
YDR523C	0.81633	1	1	1	1	1	1	1	1	1	1	1	1	1	1
YDR524C	0.83673	1	1	1	1	1	1	1	1	1	1	1	1	1	1
YDR524C-B	0.81633	1	1	1	1	1	1	1	1	1	1	1	1	1	1
YDR524W-C	0.83673	1	1	1	1	1	1	1	1	1	1	1	1	1	1
YDR525W-A	0.83673	1	1	1	1	1	1	1	1	1	1	1	1	1	1
YDR527W	0.77551	1	1	1	1	1	1	1	1	1	1	1	1	1	1
YDR528W	0.67347	1	1	1	1	1	1	1	1	1	1	1	1	1	1
YDR529C	0.67347	1	1	1	1	1	1	1	1	1	1	1	1	1	1
YDR530C	0.63265	1	1	1	1	1	1	1	1	1	1	1	1	1	1
YDR531W	0.65306	1	1	1	1	1	1	1	1	1	1	1	1	1	1
YDR532C	0.67347	1	1	1	1	1	1	1	1	1	1	1	1	1	1
YDR533C	0.67347	1	1	1	1	2	1	1	1	1	1	1	1	1	1
YDR534C	0.67347	1	1	1	1	1	1	1	1	1	1	1	1	1	1
YDR536W	0.73469	1	1	1	1	1	1	1	1	1	1	1	1	1	1
YDR538W	0.73469	1	1	1	1	1	1	1	1	1	1	1	1	1	1
YDR539W	0.7551	1	1	1	1	1	1	1	1	1	1	1	1	1	1
YDR540C	0.85714	1	1	1	1	1	1	2	1	1	1	1	1	1	1	TEL04R
YDR541C	0.91837	1	1	1	1	2	1	2	1	1	1	1	1	1	1	TEL04R
YDR542W	0.89796	1	1	2	1	2	1	2	1	1	1	1	1	1	1	TEL04R
YDR545W	0.20408	0	0	0	0	0	0	0	0	0	0	0	0	0	0	Del:All
YEL001C	0.85714	1	1	1	1	1	1	1	1	1	1	1	1	1	1
YEL002C	0.87755	1	1	1	1	1	1	1	1	1	1	1	1	1	1
YEL003W	0.85714	1	1	1	1	1	1	1	1	1	1	1	1	1	1
YEL004W	0.81633	1	1	1	1	1	1	1	1	1	1	1	1	1	1
YEL005C	0.83673	1	1	1	1	1	1	1	1	1	1	1	1	1	1
YEL006W	0.87755	1	1	1	1	1	1	1	1	1	1	1	1	1	1
YEL007W	1	1	1	1	1	1	1	1	1	1	1	1	1	1	1
YEL009C	1.04082	1	1	1	1	1	1	1	1	1	1	1	1	1	1
YEL011W	1.02041	1	1	1	1	1	1	1	1	1	1	1	1	1	1
YEL012W	1	1	1	1	1	1	1	1	1	1	1	1	1	1	1
YEL013W	1.02041	1	1	1	1	1	1	1	1	1	1	1	1	1	1
YEL015W	1.04082	1	1	1	1	1	1	1	1	1	1	1	1	1	1
YEL016C	1.02041	1	1	1	1	1	1	1	1	1	1	1	1	1	1
YEL017C-A	1.02041	1	1	1	1	1	1	1	1	1	1	1	1	1	1
YEL017W	1.02041	1	1	1	1	1	1	1	1	1	1	1	1	1	1
YEL018W	1.08163	1	1	1	1	1	1	1	1	1	1	1	1	1	1
YEL019C	1.08163	1	1	1	1	1	1	1	1	1	1	1	1	1	1
YEL020C	1.08163	1	1	1	1	1	1	1	1	1	1	1	1	1	1
YEL020W-A	1.06122	1	1	1	1	1	1	1	1	1	1	1	1	1	1
YEL021W	1.08163	1	1	1	1	1	1	1	1	1	1	1	1	1	1
YEL022W	1.14286	1	1	1	1	1	1	1	1	1	1	1	1	1	1
YEL023C	1.10204	1	1	1	1	1	1	1	1	1	1	1	1	1	1
YEL024W	1.08163	1	1	1	1	1	1	1	1	1	1	1	1	1	1
YEL025C	0.95918	1	1	1	1	1	1	1	1	1	1	1	1	1	1
YEL026W	0.89796	1	1	1	1	1	1	1	1	1	1	1	1	1	1
YEL027W	0.89796	1	1	1	1	1	1	1	1	1	1	1	1	1	1
YEL029C	0.85714	1	1	1	1	2	1	1	1	1	1	1	1	1	1
YEL030W	0.83673	1	1	1	1	2	1	1	1	1	1	1	1	1	1
YEL031W	0.89796	1	1	1	1	1	1	1	1	1	1	1	1	1	1
YEL032W	0.93878	1	1	1	1	1	1	1	1	1	1	1	1	1	1
YEL033W	0.93878	1	1	1	1	1	1	1	1	1	1	1	1	1	1
YEL034W	0.93878	1	1	1	1	1	1	1	1	1	1	1	1	1	1
YEL035C	1	1	1	1	1	1	1	1	1	1	1	1	1	1	1
YEL036C	1.02041	1	1	1	1	1	1	1	1	1	1	1	1	1	1
YEL037C	1.02041	1	1	1	1	1	1	1	1	1	1	1	1	1	1
YEL038W	1.04082	1	1	1	1	1	1	1	1	1	1	1	1	1	1
YEL039C	1.04082	1	1	1	1	1	1	1	1	1	1	1	1	1	1
YEL040W	1.02041	1	1	1	1	1	1	1	1	1	1	1	1	1	1
YEL041W	1.04082	1	1	1	1	1	1	1	1	1	1	1	1	1	1
YEL042W	0.91837	1	1	1	1	1	1	1	1	1	1	1	1	1	1
YEL043W	0.89796	1	1	1	1	1	1	1	1	1	1	1	1	1	1
YEL044W	0.83673	1	1	1	1	1	1	1	1	1	1	1	1	1	1
YEL046C	0.85714	1	1	1	1	1	1	1	1	1	1	1	1	1	1
YEL047C	0.89796	1	1	1	1	1	1	1	1	1	1	1	1	1	1
YEL048C	0.89796	1	1	2	1	1	1	1	1	1	1	1	1	1	1
YEL049W	0.93878	1	1	2	1	1	1	1	1	1	1	1	1	1	1
YEL050C	0.83673	1	1	1	1	1	1	1	1	1	1	1	1	1	1
YEL051W	0.79592	1	1	1	1	1	1	1	1	1	1	1	1	1	1
YEL052W	0.81633	1	1	1	1	1	1	1	1	1	1	1	1	1	1
YEL053C	0.83673	1	1	1	1	1	1	1	1	1	1	1	1	1	1
YEL054C	0.81633	1	1	1	1	1	1	1	1	1	1	1	1	1	1
YEL055C	0.81633	1	1	1	1	1	1	1	1	1	1	1	1	1	1
YEL056W	0.77551	1	1	1	1	1	1	1	1	1	1	1	1	1	1
YEL057C	0.79592	1	1	1	1	1	1	1	1	1	1	1	1	1	1
YEL058W	0.73469	1	1	1	1	1	1	1	1	1	1	1	1	1	1
YEL059C-A	0.67347	1	1	1	1	1	1	1	1	1	1	1	1	1	1
YEL060C	0.65306	1	1	1	1	1	1	1	1	1	1	1	1	1	1
YEL061C	0.71429	1	1	1	1	1	1	1	1	1	1	1	1	1	1
YEL062W	0.85714	1	1	1	1	1	1	1	1	1	1	1	1	1	1
YEL063C	0.83673	1	1	1	1	1	1	1	1	1	1	1	1	1	1
YEL064C	0.83673	1	1	1	1	1	1	1	1	1	1	1	1	1	1
YEL065W	0.81633	1	1	1	1	1	1	1	1	1	1	1	1	1	1
YEL066W	0.81633	1	1	1	1	1	1	1	1	2	1	1	1	1	1
YEL067C	0.81633	1	1	1	1	1	1	1	1	2	1	1	1	1	1
YEL068C	0.79592	1	1	1	1	1	1	1	1	2	1	1	1	1	1
YEL069C	0.79592	1	1	1	1	1	1	1	1	2	1	1	1	1	1
YEL070W	0.7551	1	1	1	1	1	1	1	1	2	1	1	1	1	1
YEL071W	0.77551	1	1	1	1	1	1	1	1	1	1	1	1	1	1
YEL072W	0.71429	1	1	1	1	1	1	1	1	1	1	1	1	1	1
YEL073C	0.73469	1	1	2	1	1	1	2	1	2	1	1	1	2	1	TEL05L
YEL075C	0.77551	1	1	2	1	2	1	2	1	2	1	1	1	2	1	TEL05L
YEL076C	0.77551	1	1	2	1	2	1	2	1	2	1	1	1	2	1	TEL05L
YEL076C-A	0.79592	1	1	2	1	2	1	2	1	3	1	1	1	2	1	TEL05L
YEL077C	0.79592	1	1	2	1	2	1	2	1	3	1	1	1	2	1	TEL05L
YER001W	0.81633	1	1	1	1	1	1	1	1	1	1	1	1	1	1
YER002W	0.83673	1	1	1	1	1	1	1	1	1	1	1	1	1	1
YER003C	0.93878	1	1	1	1	1	1	1	1	1	1	1	1	1	1
YER004W	1.04082	1	1	1	1	1	1	1	1	1	1	1	1	1	1
YER005W	1	1	1	1	1	1	1	1	1	1	1	1	1	1	1
YER006W	1.06122	1	1	1	1	1	1	1	1	1	1	1	1	1	1
YER007C-A	0.91837	1	1	1	1	1	1	1	1	1	1	1	1	1	1
YER007W	0.95918	1	1	1	1	1	1	1	1	1	1	1	1	1	1
YER008C	0.91837	1	1	1	1	1	1	1	1	1	1	1	1	1	1
YER009W	0.91837	1	1	1	1	1	1	1	1	1	1	1	1	1	1
YER010C	0.87755	1	1	1	1	1	1	1	1	1	1	1	1	1	1
YER011W	0.85714	1	1	1	1	1	1	1	1	1	1	1	1	1	1
YER012W	1	1	1	1	1	1	1	1	1	1	1	1	1	1	1
YER013W	1.10204	1	1	1	1	1	1	1	1	1	1	1	1	1	1
YER014C-A	1.04082	1	1	1	1	1	1	1	1	1	1	1	1	1	1
YER014W	1.06122	1	1	1	1	1	1	1	1	1	1	1	1	1	1
YER015W	1.04082	1	1	1	1	1	1	1	1	1	1	1	1	1	1
YER016W	1.12245	1	1	1	1	1	1	1	1	1	1	1	1	1	1
YER017C	1.14286	1	1	1	1	1	1	1	1	1	1	1	1	1	1
YER018C	1.06122	1	1	1	1	1	1	1	1	2	1	1	1	1	1
YER019C-A	1.04082	1	1	1	1	1	1	1	1	2	1	1	1	1	1
YER019W	1.06122	1	1	1	1	1	1	1	1	2	1	1	1	1	1
YER020W	1.06122	1	1	1	1	1	1	1	1	1	1	1	1	1	1
YER021W	1.08163	1	1	1	1	1	1	1	1	1	1	1	1	1	1
YER022W	1.12245	1	1	1	1	1	1	1	1	2	1	1	1	1	1
YER023W	1.04082	1	1	1	1	1	1	1	1	1	1	1	1	1	1
YER024W	1.04082	1	1	1	1	1	1	1	1	1	1	1	1	1	1
YER025W	1.10204	1	1	1	1	1	1	1	1	1	1	1	1	1	1
YER026C	1.14286	1	1	2	1	1	1	1	1	2	1	1	1	1	1
YER027C	1.04082	1	1	2	1	1	1	1	1	1	1	1	1	1	1
YER028C	1.06122	1	1	2	1	1	1	1	1	1	1	1	1	1	1
YER029C	1.14286	1	1	1	1	1	1	1	1	1	1	1	1	1	1
YER030W	1.10204	1	1	1	1	1	1	1	1	1	1	1	1	1	1
YER031C	1.04082	1	1	1	1	1	1	1	1	1	1	1	1	1	1
YER032W	0.91837	1	1	1	1	1	1	1	1	1	1	1	1	1	1
YER033C	0.95918	1	1	1	1	1	1	1	1	1	1	1	1	1	1
YER034W	0.97959	1	1	1	1	1	1	1	1	1	1	1	1	1	1
YER035W	1	1	1	1	1	1	1	1	1	1	1	1	1	1	1
YER036C	1	1	1	1	1	1	1	1	1	1	1	1	1	1	1
YER037W	1.08163	1	1	1	1	1	1	1	1	1	1	1	1	1	1
YER038C	1.12245	1	1	1	1	1	1	1	1	1	1	1	1	1	1
YER038W-A	1.06122	1	1	1	1	1	1	1	1	1	1	1	1	1	1
YER039C	1.08163	1	1	1	1	1	1	1	1	1	1	1	1	1	1
YER039C-A	1.10204	1	1	1	1	1	1	1	1	1	1	1	1	1	1
YER040W	1.12245	1	1	1	1	1	1	1	1	1	1	1	1	1	1
YER041W	1.10204	1	1	1	1	1	1	1	1	1	1	1	1	1	1
YER042W	1.10204	1	1	1	1	1	1	1	1	1	1	1	1	1	1
YER043C	1.14286	1	1	1	1	1	1	1	1	1	1	1	1	1	1
YER044C	1.16327	1	1	1	1	1	1	1	1	1	1	1	1	1	1
YER044C-A	1.16327	1	1	1	1	1	1	1	1	1	1	1	1	1	1
YER045C	1.14286	1	1	1	1	1	1	1	1	1	1	1	1	1	1
YER046W	1.16327	1	1	1	1	1	1	1	1	1	1	1	1	1	1
YER047C	1.16327	1	1	1	1	1	1	1	1	1	1	1	1	1	1
YER048C	1.06122	1	1	1	1	1	1	1	1	1	1	1	1	1	1
YER048W-A	1.10204	1	1	1	1	1	1	1	1	1	1	1	1	1	1
YER049W	1.08163	1	1	1	1	1	1	1	1	1	1	1	1	1	1
YER050C	1.08163	1	1	1	1	1	1	1	1	1	1	1	1	1	1
YER051W	1.06122	1	1	2	1	1	1	1	1	1	1	1	1	1	1
YER052C	1.06122	1	1	2	1	1	1	1	1	1	1	1	1	1	1
YER053C	1	1	1	2	1	1	1	1	1	1	1	1	1	1	1
YER053C-A	0.97959	1	1	2	1	1	1	1	1	1	1	1	1	1	1
YER054C	1.04082	1	1	2	1	1	1	1	1	1	1	1	1	1	1
YER055C	1.02041	1	1	1	1	1	1	1	1	1	1	1	1	1	1
YER056C	1.06122	1	1	1	1	1	1	1	1	1	1	1	1	1	1
YER056C-A	1.08163	1	1	1	1	1	1	1	1	1	1	1	1	1	1
YER057C	1.10204	1	1	1	1	1	1	1	1	1	1	1	1	1	1
YER058W	1.14286	1	1	1	1	1	1	1	1	1	1	1	1	1	1
YER059W	1.18367	1	1	1	1	1	1	1	1	1	1	1	1	1	1
YER060W	1.16327	1	1	1	1	1	1	1	1	1	1	1	1	1	1
YER060W-A	1.14286	1	1	1	1	1	1	1	1	1	1	1	1	1	1
YER061C	1.14286	1	1	1	1	1	1	1	1	1	1	1	1	1	1
YER062C	1.12245	1	1	1	1	1	1	1	1	1	1	1	1	1	1
YER063W	1.08163	1	1	1	1	1	1	1	1	1	1	1	1	1	1
YER064C	1.12245	1	1	1	1	1	1	1	1	1	1	1	1	1	1
YER065C	1.28571	1	1	1	1	1	1	1	1	1	1	1	1	1	1
YER066W	1.2449	1	1	1	1	1	1	1	1	1	1	1	1	1	1
YER067W	1.22449	1	1	1	1	1	1	1	1	1	1	1	1	1	1
YER068W	1.22449	1	1	1	1	1	1	1	1	1	1	1	1	1	1
YER069W	1.20408	1	1	1	1	1	1	1	1	1	1	1	1	1	1
YER070W	1.18367	1	1	1	1	1	1	1	1	1	1	1	1	1	1
YER071C	1.16327	1	1	1	1	1	1	1	1	1	1	1	1	1	1
YER072W	1.14286	1	1	1	1	1	1	1	1	1	1	1	1	1	1
YER073W	1.12245	1	1	1	1	1	1	1	1	1	1	1	1	1	1
YER074W	1.08163	1	1	1	1	1	1	1	1	1	1	1	1	1	1
YER074W-A	1.06122	1	1	1	1	1	1	1	1	1	1	1	1	1	1
YER075C	1.08163	1	1	1	1	1	1	1	1	1	1	1	1	1	1
YER076C	1.14286	1	1	1	1	1	1	1	1	1	1	1	1	1	1
YER077C	1.14286	1	1	1	1	1	1	1	1	1	1	1	1	1	1
YER078C	1.08163	1	1	1	1	1	1	1	1	1	1	1	1	1	1
YER078W-A	1.10204	1	1	1	1	1	1	1	1	1	1	1	1	1	1
YER079W	1.08163	1	1	1	1	1	1	1	1	1	1	1	1	1	1
YER080W	1.02041	1	1	1	1	1	1	1	1	1	1	1	1	1	1
YER081W	1.02041	1	1	1	1	1	1	1	1	2	1	1	1	1	1
YER082C	1.06122	1	1	0	1	1	1	1	1	2	1	1	1	1	1	DGY1734:False_zero, checked illumina
YER083C	1.08163	1	1	1	1	1	1	1	1	2	1	1	1	1	1
YER084W	1.08163	1	1	1	1	1	1	1	1	2	1	1	1	1	1
YER085C	1.02041	1	1	0	1	1	1	1	1	2	1	1	1	1	1	DGY1734:False_zero, checked illumina
YER086W	1.04082	1	1	1	1	1	1	1	1	2	1	1	1	1	1
YER087C-B	1.08163	1	1	1	1	1	1	1	1	2	1	1	1	1	1
YER087W	1.06122	1	1	1	1	1	1	1	1	2	1	1	1	1	1
YER088C	1.06122	1	1	1	1	1	1	1	1	1	1	1	1	1	1
YER089C	1.14286	1	1	1	1	1	1	1	1	1	1	1	1	1	1
YER090W	1.22449	1	1	1	1	2	1	1	1	1	1	1	1	1	1
YER091C	1.18367	1	1	1	1	1	1	1	1	1	1	1	1	1	1
YER092W	1.28571	1	1	1	1	1	1	1	1	1	1	1	1	1	1
YER093C	1.22449	1	1	1	1	1	1	1	1	2	1	1	1	1	1
YER093C-A	1.20408	1	1	1	1	1	1	1	1	2	1	1	1	1	1
YER094C	1.18367	1	1	1	1	1	1	1	1	2	1	1	1	1	1
YER095W	1.16327	1	1	1	1	1	1	1	1	2	1	1	1	1	1
YER096W	1.2449	1	1	1	1	1	1	1	1	2	1	1	1	1	1
YER098W	1.44898	1	1	1	1	2	1	1	1	1	1	1	1	1	1
YER099C	1.46939	1	1	1	1	2	1	1	1	1	1	1	1	1	1
YER100W	1.4898	1	1	1	1	1	1	1	1	1	1	1	1	1	1
YER101C	1.4898	1	1	1	1	1	1	1	1	1	1	1	1	1	1
YER102W	1.46939	1	1	1	1	1	1	1	1	1	1	1	1	1	1
YER103W	1.44898	1	1	1	1	1	1	1	1	1	1	1	1	1	1
YER104W	1.57143	1	1	0.5	1	0.5	1	0.5	1	0.5	1	0.5	1	0.5	1
YER105C	1.53061	0.5	1	0.5	1	0.5	1	0.5	1	0.5	1	0.5	1	0.5	1
YER106W	1.4898	1	1	1	1	1	1	1	1	1	1	1	1	1	1
YER107C	1.53061	0.5	1	0.5	1	0.5	1	0.5	1	0.5	1	0.5	1	0.5	1
YER109C	1.53061	0.5	1	0.5	1	0.5	1	0.5	1	0.5	1	0.5	1	0.5	1
YER110C	1.44898	1	1	1	1	1	1	1	1	1	1	1	1	1	1
YER111C	1.46939	2	1	1	1	1	1	1	1	1	1	1	1	1	1
YER112W	1.38776	1	1	1	1	1	1	1	1	1	1	1	1	1	1
YER113C	1.34694	1	1	1	1	1	1	1	1	1	1	1	1	1	1
YER114C	1.26531	1	1	1	1	1	1	1	1	1	1	1	1	1	1
YER115C	1.30612	2	1	1	1	1	1	1	1	1	1	1	1	1	1
YER116C	1.30612	1	1	1	1	1	1	1	1	1	1	1	1	1	1
YER117W	1.28571	1	1	1	1	1	1	1	1	1	1	1	1	1	1
YER118C	1.2449	1	1	1	1	1	1	1	1	1	1	1	1	1	1
YER119C	1.22449	1	1	1	1	1	1	1	1	1	1	1	1	1	1
YER120W	1.34694	1	1	1	1	1	1	1	1	1	1	1	1	1	1
YER121W	1.30612	1	1	1	1	1	1	1	1	1	1	1	1	1	1
YER122C	1.16327	1	1	1	1	1	1	1	1	1	1	1	1	1	1
YER123W	1.18367	1	1	1	1	1	1	1	1	1	1	1	1	1	1
YER124C	1.14286	1	1	1	1	1	1	1	1	1	1	1	1	1	1
YER125W	1.06122	1	1	1	1	1	1	1	1	1	1	1	1	1	1
YER126C	0.92857	1	1	2	1	1	1	1	1	1	1	1	1	1	1
YER127W	0.93878	1	1	1	1	1	1	1	1	1	1	1	1	1	1
YER128W	1.02041	1	1	1	1	1	1	1	1	1	1	1	1	1	1
YER129W	0.95918	1	1	1	1	1	1	1	1	1	1	1	1	1	1
YER130C	0.97959	1	1	1	1	1	1	1	1	1	1	1	1	1	1
YER131W	0.85714	1	1	1	1	1	1	1	1	1	1	1	1	1	1
YER132C	0.85714	1	1	1	1	1	1	1	1	1	1	1	1	1	1
YER133W	1.08163	1	1	2	1	3	2	1	1	1	1	1	1	1	1	DGY1734_GLC7_CNV, DGY1747_GLC7_CNV
YER134C	0.91837	2	1	2	1	3	2	1	1	1	1	1	1	1	1	DGY1734_GLC7_CNV, DGY1747_GLC7_CNV
YER136W	0.85714	1	1	2	1	2	2	1	1	1	1	1	1	1	1	DGY1734_GLC7_CNV, DGY1747_GLC7_CNV
YER137C	0.83673	1	1	2	1	2	2	1	1	1	1	1	1	1	1	DGY1734_GLC7_CNV, DGY1747_GLC7_CNV
YER137C-A	3.97959	1	1	2.5	1	2.25	2.25	5.5	1	2	1	2.5	1	1.5	1	ty
YER138C	3.95918	1.25	1	2.5	1	2.25	2.25	6.25	1	2.25	1	2.75	1	1.5	1	ty
YER138W-A	1.08163	1	1	2	1	1	1	2	1	1	1	1	1	1	1	ty
YER139C	0.89796	1	1	1	1	1	1	1	1	1	1	1	1	1	1
YER140W	0.95918	1	1	1	1	1	1	1	1	1	1	1	1	1	1
YER141W	0.97959	1	1	1	1	1	1	1	1	1	1	1	1	1	1
YER142C	0.87755	1	1	1	1	1	1	1	1	1	1	1	1	1	1
YER143W	0.89796	1	1	1	1	1	1	1	1	1	1	1	1	1	1
YER144C	0.83673	1	1	1	1	1	1	1	1	1	1	1	1	1	1
YER145C	0.83673	1	1	1	1	1	1	1	1	1	1	1	1	1	1
YER146W	0.79592	1	1	1	1	1	1	1	1	1	1	1	1	1	1
YER147C	0.79592	1	1	1	1	1	1	1	1	1	1	1	1	1	1
YER148W	0.79592	1	1	1	1	1	1	1	1	1	1	1	1	1	1
YER149C	0.81633	1	1	1	1	1	1	1	1	1	1	1	1	1	1
YER150W	0.85714	1	1	1	1	1	1	1	1	1	1	1	1	1	1
YER151C	0.77551	1	1	1	1	1	1	1	1	1	1	1	1	1	1
YER152C	0.83673	1	1	1	1	1	1	1	1	1	1	1	1	1	1
YER153C	0.83673	1	1	1	1	1	1	1	1	1	1	1	1	1	1
YER154W	0.85714	1	1	1	1	1	1	1	1	1	1	1	1	1	1
YER155C	0.87755	1	1	1	1	1	1	1	1	1	1	1	1	1	1
YER156C	0.89796	1	1	1	1	1	1	1	1	1	1	1	1	1	1
YER157W	0.89796	1	1	1	1	1	1	1	1	1	1	1	1	1	1
YER158C	0.95918	1	1	2	1	1	1	1	1	1	1	1	1	1	1
YER159C	1.04082	1	1	2	1	1	1	1	1	1	1	1	1	1	1
YER159C-A	1.28571	2	1	2	1	2	1	3	1	3	1	2	1	2	1	ty
YER160C	1.20408	2	1	3	1	2	1	3	1	3	1	2	1	3	1	ty
YER161C	0.93878	1	1	1	1	1	1	1	1	1	1	1	1	1	1
YER162C	0.95918	1	1	1	1	1	1	1	1	1	1	1	1	1	1
YER163C	0.97959	1	1	1	1	1	1	1	1	1	1	1	1	1	1
YER164W	1.06122	1	1	1	1	1	1	1	1	1	1	1	1	1	1
YER165W	1.06122	1	1	1	1	1	1	1	1	1	1	1	1	1	1
YER166W	1.06122	1	1	1	1	2	1	1	1	1	1	1	1	1	1
YER167W	1.16327	1	1	1	1	2	1	1	1	2	1	1	1	1	1
YER168C	1.10204	1	1	1	1	1	1	1	1	2	1	1	1	1	1
YER169W	1.14286	1	1	1	1	2	1	1	1	1	1	1	1	1	1
YER170W	1.14286	1	1	1	1	2	1	1	1	1	1	1	1	1	1
YER171W	1.10204	1	1	1	1	2	1	1	1	1	1	1	1	1	1
YER172C	1.10204	1	1	1	1	2	1	1	1	1	1	1	1	1	1
YER173W	1.08163	1	1	1	1	1	1	1	1	1	1	1	1	1	1
YER174C	1.08163	1	1	1	1	1	1	1	1	1	1	1	1	1	1
YER175C	1.08163	1	1	1	1	1	1	1	1	1	1	1	1	1	1
YER175W-A	1.04082	1	1	1	1	1	1	1	1	1	1	1	1	1	1
YER176W	1.02041	1	1	1	1	2	1	1	1	1	1	1	1	1	1
YER177W	1	1	1	1	1	2	1	1	1	2	1	1	1	1	1
YER178W	0.93878	1	1	1	1	2	1	1	1	1	1	1	1	1	1
YER179W	0.93878	1	1	1	1	2	1	1	1	1	1	1	1	1	1
YER180C	0.93878	1	1	1	1	2	1	1	1	1	1	1	1	1	1
YER180C-A	0.91837	1	1	1	1	2	1	1	1	1	1	1	1	1	1
YER182W	0.89796	1	1	1	1	2	1	1	1	1	1	1	1	1	1
YER183C	0.87755	1	1	1	1	2	1	1	1	2	1	1	1	1	1
YER184C	0.85714	1	1	1	1	2	1	1	1	2	1	1	1	1	1
YER185W	0.85714	1	1	1	1	2	1	1	1	2	1	1	1	1	1
YER186C	0.89796	1	1	1	1	2	1	1	1	2	1	1	1	1	1
YER187W	1.08163	1	1	1	1	2	1	2	1	2	1	1	1	1	1	TEL05R
YER188C-A	1.12245	1	1	2	1	2	1	2	1	3	1	1	1	1	1	TEL05R
YER189W	1.14286	1	1	3	1	3	1	3	1	3	1	1	1	2	1	TEL05R
YER190C-B	1.38776	1	1	8	1	4	1	4	1	5	1	1	1	4	1	TEL05R
YER190W	1.28571	1	1	6	1	4	1	4	1	4	1	1	1	4	1	TEL05R
YFL001W	1.22449	1	1	1	1	1	1	1	1	1	1	1	1	2	1
YFL002C	1.22449	1	1	1	1	1	1	1	1	1	1	1	1	2	1
YFL002W-A	1.4898	2	1	2	1	1	1	2	1	2	1	1	1	3	1	ty
YFL002W-B	1.42857	2	1	2	1	1	1	2	1	1	1	1	1	3	1	ty
YFL003C	1.40816	1	1	1	1	1	1	1	1	1	1	1	1	1	1
YFL004W	1.42857	1	1	2	1	1	1	1	1	1	1	1	1	1	1
YFL005W	1.26531	1	1	2	1	1	1	1	1	1	1	1	1	1	1
YFL007W	1.26531	1	1	1	1	1	1	1	1	1	1	1	1	1	1
YFL008W	1.2449	1	1	1	1	1	1	1	1	1	1	1	1	1	1
YFL009W	1.14286	1	1	1	1	1	1	1	1	1	1	1	1	1	1
YFL010C	1.14286	1	1	1	1	1	1	1	1	1	1	1	1	1	1
YFL010W-A	1.14286	1	1	1	1	1	1	1	1	1	1	1	1	1	1
YFL011W	1.04082	1	1	1	1	1	1	1	1	1	1	1	1	1	1
YFL012W	1.02041	1	1	1	1	1	1	1	1	1	1	1	1	1	1
YFL013C	1.06122	1	1	1	1	1	1	1	1	1	1	1	1	1	1
YFL014W	1.08163	1	1	1	1	1	1	1	1	1	1	1	1	1	1
YFL016C	1.04082	1	1	1	1	1	1	1	1	1	1	1	1	1	1
YFL017C	1.10204	1	1	1	1	1	1	1	1	1	1	1	1	1	1
YFL017W-A	1.12245	2	1	1	1	1	1	1	1	1	1	1	1	1	1
YFL018C	1.14286	1	1	1	1	1	1	1	1	1	1	1	1	1	1
YFL020C	1.34694	1	1	1	1	1	1	1	1	1	1	1	1	1	1
YFL021W	1.28571	1	1	1	1	1	1	1	1	1	1	1	1	1	1
YFL022C	1.32653	1	1	1	1	1	1	1	1	1	1	1	1	1	1
YFL023W	1.38776	1	1	1	1	1	1	1	1	1	1	1	1	1	1
YFL024C	1.30612	1	1	1	1	1	1	1	1	1	1	1	1	1	1
YFL025C	1.26531	1	1	1	1	1	1	1	1	1	1	1	1	1	1
YFL026W	1.26531	1	1	1	1	1	1	1	1	1	1	1	1	1	1
YFL027C	1.20408	1	1	1	1	1	1	1	1	1	1	1	1	1	1
YFL028C	1.16327	1	1	1	1	1	1	1	1	1	1	1	1	1	1
YFL029C	1.16327	1	1	1	1	1	1	1	1	1	1	1	1	1	1
YFL030W	1.12245	1	1	1	1	1	1	1	1	1	1	1	1	1	1
YFL031W	1.12245	1	1	1	1	1	1	1	1	1	1	1	1	1	1
YFL033C	1.20408	1	1	1	1	1	1	1	1	2	1	1	1	1	1
YFL034C-A	1.16327	1	1	1	1	1	1	1	1	1	1	1	1	2	1
YFL034C-B	1.18367	1	1	1	1	1	1	1	1	1	1	1	1	2	1
YFL034W	1.14286	1	1	1	1	1	1	1	1	1	1	1	1	2	1
YFL036W	1.14286	1	1	1	1	1	1	1	1	1	1	1	1	2	1
YFL037W	1.14286	1	1	2	1	1	1	1	1	1	1	1	1	1	1
YFL038C	1.18367	1	1	2	1	1	1	1	1	1	1	1	1	1	1
YFL039C	1.18367	1	1	2	1	1	1	1	1	1	1	1	1	1	1
YFL040W	1.12245	1	1	2	1	1	1	1	1	1	1	1	1	1	1
YFL041W	1.12245	1	1	1	1	1	1	1	1	1	1	1	1	1	1
YFL041W-A	1.12245	1	1	1	1	1	1	1	1	1	1	1	1	1	1
YFL042C	1.10204	1	1	1	1	1	1	1	1	1	1	1	1	1	1
YFL044C	1.08163	1	1	1	1	1	1	1	1	1	1	1	1	1	1
YFL045C	1.06122	1	1	1	1	1	1	1	1	1	1	1	1	1	1
YFL046W	1.04082	1	1	1	1	1	1	1	1	2	1	1	1	1	1
YFL047W	1.08163	1	1	1	1	1	1	1	1	1	1	1	1	1	1
YFL048C	1.04082	1	1	1	1	1	1	1	1	1	1	1	1	1	1
YFL049W	0.95918	1	1	1	1	1	1	1	1	1	1	1	1	1	1
YFL050C	0.95918	1	1	1	1	1	1	1	1	1	1	1	1	1	1
YFL051C	0.79592	1	1	1	1	1	1	1	1	1	1	1	1	1	1
YFL052W	0.77551	1	1	1	1	1	1	1	1	1	1	1	1	1	1
YFL053W	0.85714	1	1	1	1	1	1	1	1	2	1	1	1	1	1
YFL054C	0.85714	1	1	1	1	1	1	1	1	2	1	1	1	1	1
YFL055W	0.79592	1	1	1	1	1	1	1	1	2	1	1	1	1	1
YFL056C	0.81633	1	1	1	1	1	1	1	1	2	1	1	1	1	1
YFL058W	0.81633	1	1	2	1	1	1	2	1	2	1	1	1	1	1	TEL06L
YFL059W	0.81633	1	1	2	1	1	1	2	1	2	1	1	1	1	1	TEL06L
YFL060C	0.83673	1	1	2	1	1	1	2	1	2	1	1	1	1	1	TEL06L
YFL061W	0.83673	1	1	1	1	1	1	2	1	2	1	1	1	1	1	TEL06L
YFL062W	0.81633	1	1	1	1	1	1	2	1	2	1	1	1	2	1	TEL06L
YFL064C	0.81633	1	1	2	1	1	1	2	1	3	1	1	1	3	1	TEL06L
YFL065C	0.83673	1	1	3	1	1	1	2	1	3	1	1	1	3	1	TEL06L
YFL066C	0.79592	1	1	2	1	1	1	2	1	2	1	1	1	3	1	TEL06L
YFL067W	0.77551	1	1	2	1	1	1	2	1	2	1	1	1	1	1	TEL06L
YFL068W	0.77551	1	1	2	1	1	1	2	1	2	1	1	1	1	1	TEL06L
YFR001W	1.22449	1	1	1	1	1	1	1	1	1	1	1	1	1	1
YFR002W	1.22449	1	1	1	1	1	1	1	1	1	1	1	1	1	1
YFR003C	1.16327	1	1	1	1	1	1	1	1	1	1	1	1	1	1
YFR004W	1.18367	1	1	1	1	1	1	1	1	1	1	1	1	1	1
YFR005C	1.16327	1	1	1	1	1	1	1	1	2	1	1	1	2	1
YFR006W	1.18367	1	1	1	1	1	1	1	1	2	1	1	1	2	1
YFR007W	1.14286	1	1	1	1	1	1	1	1	2	1	1	1	2	1
YFR008W	1.14286	1	1	1	1	1	1	1	1	2	1	1	1	2	1
YFR009W	1.20408	1	1	1	1	1	1	1	1	2	1	1	1	1	1
YFR010W	1.08163	1	1	1	1	1	1	1	1	2	1	1	1	1	1
YFR011C	1.04082	1	1	1	1	1	1	1	1	2	1	1	1	1	1
YFR012W	1	1	1	1	1	1	1	1	1	2	1	1	1	1	1
YFR012W-A	0.95918	1	1	1	1	1	1	1	1	2	1	1	1	1	1
YFR013W	1	1	1	1	1	1	1	1	1	2	1	1	1	1	1
YFR014C	1.08163	1	1	1	1	1	1	1	1	2	1	1	1	1	1
YFR015C	1	1	1	1	1	1	1	1	1	1	1	1	1	1	1
YFR016C	1.02041	1	1	1	1	1	1	1	1	1	1	1	1	1	1
YFR017C	0.89796	1	1	1	1	1	1	1	1	1	1	1	1	1	1
YFR018C	0.95918	1	1	1	1	1	1	1	1	1	1	1	1	1	1
YFR019W	0.95918	1	1	1	1	1	1	1	1	1	1	1	1	1	1
YFR020W	0.91837	1	1	1	1	1	1	1	1	1	1	1	1	1	1
YFR021W	0.89796	1	1	2	1	1	1	1	1	1	1	1	1	1	1
YFR022W	0.91837	1	1	2	1	1	1	1	1	1	1	1	1	1	1
YFR023W	0.91837	1	1	1	1	1	1	1	1	1	1	1	1	2	1
YFR024C-A	0.89796	1	1	1	1	1	1	1	1	1	1	1	1	1	1
YFR025C	0.91837	1	1	1	1	1	1	1	1	1	1	1	1	1	1
YFR026C	0.97959	1	1	1	1	1	1	1	1	1	1	1	1	1	1
YFR027W	0.95918	1	1	1	1	1	1	1	1	1	1	1	1	2	1
YFR028C	0.97959	1	1	1	1	1	1	1	1	1	1	1	1	1	1
YFR029W	0.97959	1	1	2	1	1	1	1	1	1	1	1	1	1	1
YFR030W	1.06122	1	1	1	1	1	1	1	1	1	1	1	1	1	1
YFR031C	0.97959	1	1	1	1	2	1	1	1	1	1	1	1	1	1
YFR031C-A	0.81633	1	1	1	1	1	1	1	1	1	1	1	1	1	1
YFR032C	0.81633	1	1	1	1	1	1	1	1	1	1	1	1	1	1
YFR032C-A	0.85714	1	1	1	1	1	1	1	1	1	1	1	1	1	1
YFR032C-B	0.79592	1	1	1	1	1	1	1	1	2	1	1	1	1	1
YFR033C	0.85714	1	1	1	1	1	1	1	1	1	1	1	1	1	1
YFR034C	0.89796	1	1	1	1	1	1	1	1	1	1	1	1	1	1
YFR035C	0.93878	1	1	1	1	1	1	1	1	2	1	1	1	1	1
YFR036W	0.93878	1	1	1	1	1	1	1	1	2	1	1	1	1	1
YFR037C	0.91837	1	1	1	1	1	1	1	1	1	1	1	1	1	1
YFR038W	0.83673	1	1	1	1	1	1	1	1	2	1	1	1	1	1
YFR039C	0.7551	1	1	1	1	1	1	1	1	1	1	1	1	1	1
YFR040W	0.83673	1	1	1	1	1	1	1	1	2	1	1	1	1	1
YFR041C	0.71429	1	1	1	1	1	1	1	1	2	1	1	1	1	1
YFR042W	0.65306	1	1	1	1	1	1	1	1	2	1	1	1	1	1
YFR043C	0.65306	1	1	1	1	2	1	1	1	2	1	1	1	1	1
YFR044C	0.63265	1	1	1	1	2	1	1	1	2	1	1	1	1	1
YFR045W	0.63265	1	1	1	1	1	1	1	1	2	1	1	1	1	1
YFR046C	0.67347	1	1	1	1	1	1	1	1	1	1	1	1	1	1
YFR047C	0.61224	1	1	1	1	1	1	1	1	1	1	1	1	1	1
YFR048W	0.61224	1	1	1	1	2	1	1	1	1	1	1	1	1	1
YFR049W	0.57143	1	1	1	1	2	1	1	1	1	1	1	1	1	1
YFR050C	0.57143	1	1	1	1	2	1	1	1	1	1	1	1	1	1
YFR051C	0.55102	1	1	1	1	2	1	1	1	1	1	1	1	1	1
YFR052W	0.53061	1	1	1	1	2	1	1	1	1	1	1	1	1	1
YFR053C	0.55102	1	1	1	1	2	1	1	1	1	1	1	1	1	1
YFR055W	0.59184	1	1	1	1	1	1	2	1	1	1	1	1	2	1	TEL06R
YFR057W	0.59184	1	1	1	1	2	1	2	1	2	1	1	1	2	1	TEL06R
YGL001C	1.32653	1	1	1	1	1	1	1	1	1	1	1	1	1	1
YGL002W	1.2449	1	1	1	1	1	1	1	1	1	1	1	1	1	1
YGL003C	1.26531	1	1	1	1	1	1	1	1	1	1	1	1	1	1
YGL004C	1.28571	1	1	1	1	1	1	1	1	1	1	1	1	1	1
YGL005C	1.30612	1	1	1	1	1	1	1	1	1	1	1	1	1	1
YGL006W	1.26531	1	1	1	1	1	1	1	1	1	1	1	1	1	1
YGL006W-A	1.30612	1	1	1	1	1	1	1	1	1	1	1	1	1	1
YGL007C-A	1.28571	1	1	1	1	1	1	1	1	1	1	1	1	1	1
YGL008C	1.30612	1	1	1	1	1	1	1	1	1	1	1	1	1	1
YGL009C	1.30612	1	1	1	1	1	1	1	1	1	1	1	1	1	1
YGL010W	1.36735	1	1	1	1	1	1	1	1	1	1	1	1	1	1
YGL011C	1.30612	1	1	1	1	1	1	1	1	1	1	1	1	1	1
YGL012W	1.26531	1	1	1	1	1	1	1	1	1	1	1	1	1	1
YGL013C	1.14286	1	1	1	1	1	1	1	1	1	1	1	1	1	1
YGL014W	1	1	1	1	1	1	1	1	1	1	1	1	1	1	1
YGL015C	0.95918	1	1	1	1	1	1	1	1	1	1	1	1	1	1
YGL016W	1.06122	1	1	1	1	1	1	1	1	1	1	1	1	1	1
YGL017W	1.12245	1	1	1	1	1	1	1	1	1	1	1	1	1	1
YGL018C	1.14286	1	1	1	1	1	1	1	1	1	1	1	1	1	1
YGL019W	1.22449	1	1	1	1	1	1	1	1	1	1	1	1	1	1
YGL020C	1.22449	1	1	1	1	1	1	1	1	1	1	1	1	1	1
YGL021W	1.16327	1	1	1	1	1	1	1	1	1	1	1	1	1	1
YGL022W	1.22449	1	1	1	1	1	1	1	1	1	1	1	1	1	1
YGL023C	1.22449	1	1	1	1	1	1	1	1	1	1	1	1	1	1
YGL025C	1.22449	1	1	1	1	1	1	1	1	1	1	1	1	1	1
YGL026C	1.20408	1	1	1	1	1	1	1	1	1	1	1	1	1	1
YGL027C	1.2449	1	1	1	1	1	1	1	1	1	1	1	1	1	1
YGL028C	1.30612	1	1	1	1	1	1	1	1	1	1	1	1	1	1
YGL029W	1.40816	1	1	1	1	1	1	1	1	1	1	1	1	1	1
YGL030W	1.38776	1	1	1	1	1	1	1	1	1	1	1	1	1	1
YGL031C	1.44898	1	1	1	1	1	1	1	1	1	1	1	1	1	1
YGL032C	1.55102	0.5	1	0.5	1	0.5	1	0.5	1	0.5	1	0.5	1	0.5	1
YGL033W	1.53061	0.5	1	0.5	1	0.5	1	0.5	1	0.5	1	0.5	1	0.5	1
YGL035C	1.46939	1	1	1	1	1	1	1	1	1	1	1	1	1	1
YGL036W	1.40816	1	1	1	1	1	1	1	1	1	1	1	1	1	1
YGL037C	1.32653	1	1	1	1	1	1	1	1	1	1	1	1	1	1
YGL038C	1.32653	1	1	1	1	1	1	1	1	1	1	1	1	1	1
YGL039W	1.36735	1	1	1	1	1	1	1	1	1	1	1	1	1	1
YGL040C	1.12245	1	1	1	1	1	1	1	1	1	1	1	1	1	1
YGL041C-B	1.10204	1	1	1	1	1	1	1	1	1	1	1	1	1	1
YGL041W-A	1.12245	1	1	1	1	1	1	1	1	1	1	1	1	1	1
YGL043W	1.04082	1	1	1	1	1	1	1	1	1	1	1	1	1	1
YGL044C	1.04082	1	1	1	1	1	1	1	1	1	1	1	1	1	1
YGL045W	1.08163	1	1	1	1	1	1	1	1	1	1	1	1	1	1
YGL047W	0.93878	1	1	1	1	1	1	1	1	1	1	1	1	1	1
YGL048C	0.93878	1	1	1	1	1	1	1	1	1	1	1	1	1	1
YGL049C	0.87755	1	1	1	1	1	1	1	1	0	1	1	1	1	1	False_DEL:DGY1736
YGL050W	0.87755	1	1	1	1	1	1	1	1	1	1	1	1	1	1
YGL051W	0.85714	1	1	1	1	1	1	1	1	1	1	1	1	1	1
YGL053W	0.87755	1	1	1	1	1	1	1	1	1	1	1	1	1	1
YGL054C	0.77551	1	1	1	1	1	1	1	1	1	1	1	1	1	1
YGL055W	0.83673	1	1	1	1	1	1	1	1	1	1	1	1	1	1
YGL056C	0.91837	1	1	1	1	1	1	1	1	1	1	1	1	1	1
YGL057C	0.93878	1	1	1	1	1	1	1	1	1	1	1	1	1	1
YGL058W	0.91837	1	1	1	1	1	1	1	1	1	1	1	1	1	1
YGL059W	0.93878	1	1	1	1	1	1	1	1	1	1	1	1	1	1
YGL060W	0.93878	1	1	1	1	1	1	1	1	1	1	1	1	1	1
YGL061C	0.93878	1	1	1	1	1	1	1	1	1	1	1	1	1	1
YGL062W	0.89796	1	1	1	1	1	1	1	1	1	1	1	1	1	1
YGL063W	0.81633	1	1	1	1	1	1	1	1	1	1	1	1	1	1
YGL064C	0.79592	1	1	1	1	1	1	1	1	1	1	1	1	1	1
YGL065C	0.81633	1	1	1	1	1	1	1	1	1	1	1	1	1	1
YGL066W	0.81633	1	1	1	1	1	1	1	1	1	1	1	1	1	1
YGL067W	0.83673	1	1	1	1	1	1	1	1	1	1	1	1	1	1
YGL068W	0.89796	1	1	1	1	1	1	1	1	1	1	1	1	1	1
YGL070C	0.93878	1	1	1	1	1	1	1	1	1	1	1	1	1	1
YGL071W	0.93878	1	1	1	1	1	1	1	1	1	1	1	1	1	1
YGL073W	0.93878	1	1	1	1	1	1	1	1	1	1	1	1	1	1
YGL075C	1	1	1	1	1	1	1	1	1	1	1	1	1	1	1
YGL076C	1	1	1	1	1	2	1	1	1	1	1	1	1	1	1
YGL077C	1.04082	1	1	1	1	1	1	1	1	1	1	1	1	1	1
YGL078C	1.06122	1	1	1	1	1	1	1	1	1	1	1	1	1	1
YGL079W	1.08163	1	1	1	1	1	1	1	1	1	1	1	1	1	1
YGL080W	1.12245	1	1	1	1	2	1	1	1	1	1	1	1	1	1
YGL081W	1.20408	1	1	1	1	1	1	1	1	1	1	1	1	1	1
YGL082W	1.20408	1	1	1	1	1	1	1	1	1	1	1	1	1	1
YGL083W	1.20408	1	1	1	1	1	1	1	1	1	1	1	1	1	1
YGL084C	1.18367	1	1	1	1	1	1	1	1	1	1	1	1	1	1
YGL085W	1.16327	1	1	1	1	1	1	1	1	1	1	1	1	1	1
YGL086W	1.12245	1	1	1	1	1	1	1	1	1	1	1	1	1	1
YGL087C	1.14286	1	1	1	1	1	1	1	1	1	1	1	1	1	1
YGL089C	1.08163	1	1	1	1	1	1	1	1	1	1	1	1	1	1
YGL090W	1.12245	1	1	1	1	1	1	1	1	1	1	1	1	1	1
YGL091C	1.14286	1	1	1	1	1	1	1	1	2	1	1	1	1	1
YGL092W	1.16327	1	1	1	1	2	1	1	1	1	1	1	1	1	1
YGL093W	1.12245	1	1	1	1	1	1	1	1	1	1	1	1	1	1
YGL094C	1.12245	1	1	1	1	1	1	1	1	1	1	1	1	1	1
YGL095C	1.02041	1	1	1	1	1	1	1	1	2	1	1	1	1	1
YGL096W	0.89796	1	1	1	1	1	1	1	1	1	1	1	1	1	1
YGL097W	0.91837	1	1	1	1	1	1	1	1	1	1	1	1	1	1
YGL098W	1.04082	1	1	1	1	1	1	1	1	2	1	1	1	1	1
YGL099W	1.08163	1	1	1	1	1	1	1	1	1	1	1	1	1	1
YGL100W	1.12245	1	1	1	1	1	1	1	1	1	1	1	1	1	1
YGL101W	1.06122	1	1	1	1	1	1	1	1	1	1	1	1	1	1
YGL103W	1.10204	1	1	1	1	1	1	1	1	1	1	1	1	1	1
YGL104C	1.02041	1	1	1	1	1	1	1	1	1	1	1	1	1	1
YGL105W	0.95918	1	1	1	1	1	1	1	1	1	1	1	1	1	1
YGL106W	1	1	1	1	1	1	1	1	1	1	1	1	1	1	1
YGL107C	0.97959	1	1	1	1	1	1	1	1	1	1	1	1	1	1
YGL108C	0.95918	1	1	1	1	1	1	1	1	1	1	1	1	1	1
YGL110C	0.97959	1	1	1	1	1	1	1	1	1	1	1	1	1	1
YGL111W	0.97959	1	1	1	1	1	1	1	1	1	1	1	1	1	1
YGL112C	0.97959	1	1	1	1	1	1	1	1	1	1	1	1	1	1
YGL113W	0.95918	1	1	1	1	1	1	1	1	1	1	1	1	1	1
YGL114W	1	1	1	1	1	1	1	1	1	1	1	1	1	1	1
YGL115W	1.16327	1	1	2	1	1	1	1	1	1	1	1	1	1	1
YGL116W	1.18367	1	1	1	1	1	1	1	1	1	1	1	1	1	1
YGL117W	1.22449	1	1	1	1	2	1	1	1	1	1	1	1	1	1
YGL119W	1.08163	1	1	1	1	1	1	1	1	1	1	1	1	1	1
YGL120C	1.02041	1	1	1	1	1	1	1	1	1	1	1	1	1	1
YGL121C	1	1	1	1	1	1	1	1	1	1	1	1	1	1	1
YGL122C	1	1	1	1	1	1	1	1	1	1	1	1	1	1	1
YGL123W	0.95918	1	1	1	1	1	1	1	1	1	1	1	1	1	1
YGL124C	0.87755	1	1	1	1	1	1	1	1	1	1	1	1	1	1
YGL125W	0.79592	1	1	1	1	1	1	1	1	1	1	1	1	1	1
YGL126W	0.79592	1	1	1	1	1	1	1	1	1	1	1	1	1	1
YGL127C	0.73469	1	1	1	1	1	1	1	1	1	1	1	1	1	1
YGL128C	0.77551	1	1	1	1	1	1	1	1	1	1	1	1	1	1
YGL129C	0.85714	1	1	1	1	1	1	1	1	1	1	1	1	1	1
YGL130W	0.85714	1	1	1	1	1	1	1	1	1	1	1	1	1	1
YGL131C	0.89796	1	1	1	1	1	1	1	1	1	1	1	1	1	1
YGL133W	1	1	1	1	1	1	1	1	1	1	1	1	1	1	1
YGL134W	1.04082	1	1	1	1	1	1	1	1	1	1	1	1	1	1
YGL135W	1.08163	1	1	1	1	1	1	1	1	1	1	1	1	1	1
YGL136C	1.06122	1	1	1	1	1	1	1	1	1	1	1	1	1	1
YGL137W	1.18367	1	1	1	1	1	1	1	1	1	1	1	1	1	1
YGL138C	1.22449	1	1	1	1	1	1	1	1	1	1	1	1	1	1
YGL139W	1.18367	1	1	1	1	1	1	1	1	1	1	1	1	1	1
YGL140C	1.20408	1	1	1	1	1	1	1	1	1	1	1	1	1	1
YGL141W	1.2449	1	1	1	1	1	1	1	1	1	1	1	1	1	1
YGL142C	1.28571	1	1	1	1	1	1	1	1	1	1	1	1	1	1
YGL143C	1.34694	1	1	1	1	1	1	1	1	1	1	1	1	1	1
YGL144C	1.28571	1	1	1	1	1	1	1	1	1	1	1	1	1	1
YGL145W	1.20408	1	1	1	1	1	1	1	1	1	1	1	1	1	1
YGL146C	1.2449	1	1	1	1	1	1	1	1	1	1	1	1	1	1
YGL147C	1.34694	1	1	1	1	1	1	1	1	1	1	1	1	1	1
YGL148W	1.38776	1	1	1	1	1	1	1	1	1	1	1	1	1	1
YGL150C	1.20408	1	1	1	1	1	1	1	1	1	1	1	1	1	1
YGL151W	1.14286	1	1	1	1	1	1	1	1	1	1	1	1	1	1
YGL153W	1.08163	1	1	1	1	1	1	1	1	1	1	1	1	1	1
YGL154C	1.08163	1	1	1	1	1	1	1	1	1	1	1	1	1	1
YGL155W	1.02041	1	1	1	1	1	1	1	1	1	1	1	1	1	1
YGL156W	0.95918	1	1	1	1	1	1	1	1	1	1	1	1	1	1
YGL157W	0.87755	1	1	1	1	1	1	1	1	1	1	1	1	1	1
YGL158W	0.95918	1	1	1	1	1	1	1	1	1	1	1	1	1	1
YGL159W	1.08163	1	1	1	1	1	1	1	1	1	1	1	1	1	1
YGL160W	1.20408	1	1	1	1	1	1	1	1	1	1	1	1	1	1
YGL161C	1.18367	1	1	1	1	1	1	1	1	1	1	1	1	1	1
YGL162W	1.18367	1	1	1	1	1	1	1	1	1	1	1	1	1	1
YGL163C	1.16327	1	1	1	1	1	1	1	1	1	1	1	1	1	1
YGL164C	1.04082	1	1	1	1	1	1	1	1	1	1	1	1	1	1
YGL166W	1.04082	1	1	1	1	1	1	1	1	1	1	1	1	1	1
YGL167C	1.06122	1	1	1	1	1	1	1	1	1	1	1	1	1	1
YGL168W	1.06122	1	1	1	1	1	1	1	1	1	1	1	1	1	1
YGL169W	1.08163	1	1	1	1	1	1	1	1	1	1	1	1	1	1
YGL170C	1.12245	1	1	1	1	1	1	1	1	1	1	1	1	1	1
YGL171W	1.06122	1	1	1	1	1	1	1	1	1	1	1	1	1	1
YGL172W	1.06122	1	1	1	1	1	1	1	1	1	1	1	1	1	1
YGL173C	1.10204	1	1	1	1	1	1	1	1	1	1	1	1	1	1
YGL174W	1.06122	1	1	1	1	1	1	1	1	1	1	1	1	1	1
YGL175C	1.04082	1	1	1	1	1	1	1	1	1	1	1	1	1	1
YGL176C	1.04082	1	1	1	1	1	1	1	1	1	1	1	1	1	1
YGL178W	1.12245	1	1	1	1	1	1	1	1	1	1	1	1	1	1
YGL179C	1.16327	1	1	1	1	1	1	1	1	1	1	1	1	1	1
YGL180W	0.95918	1	1	1	1	1	1	1	1	1	1	1	1	1	1
YGL181W	0.91837	1	1	1	1	1	1	1	1	1	1	1	1	1	1
YGL183C	0.85714	1	1	1	1	1	1	1	1	1	1	1	1	1	1
[truncated: 3,909 more rows]

## Sheet: DGY1734_GAP1_CNV
Gene	DGY1657	rel_DGY1734	rel_DGY1734_cor
YKL021C	0.97959	3	2
YKL020C	0.91837	3	2
YKL019W	0.83673	2	2
YKL018W	0.81633	3	2
YKL018C-A	0.85714	3	2
YKL017C	0.81633	2	2
YKL016C	0.87755	2	2
YKL015W	0.85714	2	2
YKL014C	0.7551	2	2
YKL013C	0.67347	2	2
YKL012W	0.77551	2	2
YKL011C	0.79592	2	2
YKL010C	0.91837	2	2
YKL009W	0.97959	2	2
YKL008C	0.97959	2	2
YKL007W	0.95918	1	2
YKL006W	0.89796	2	2
YKL006C-A	0.89796	2	2
YKL005C	0.89796	2	2
YKL004W	0.91837	2	2
YKL003C	0.97959	2	2
YKL002W	1.02041	2	2
YKL001C	0.97959	2	2
YKR001C	0.95918	2	2
YKR002W	0.95918	1	2
YKR003W	0.95918	2	2
YKR004C	0.89796	2	2
YKR005C	0.93878	2	2
YKR006C	0.91837	2	2
YKR007W	0.93878	2	2
YKR008W	0.93878	2	2
YKR009C	0.85714	2	2
YKR010C	0.87755	2	2
YKR011C	0.95918	2	2
YKR013W	1.02041	2	2
YKR014C	1.12245	2	2
YKR015C	1.14286	3	2
YKR016W	1.10204	3	2
YKR017C	1.14286	3	4
YKR018C	1.16327	4	4
YKR019C	1.12245	3	4
YKR020W	1.08163	4	4
YKR021W	1.04082	4	4
YKR022C	0.97959	4	4
YKR023W	1	4	4
YKR024C	0.95918	4	4
YKR025W	0.95918	4	4
YKR026C	0.95918	4	4
YKR027W	1.04082	4	4
YKR028W	1.08163	4	4
YKR029C	1.10204	4	4
YKR030W	1.14286	4	4
YKR031C	1.12245	3	4
YKR034W	1.10204	4	4
YKR035W-A	1.10204	4	4
YKR036C	1.10204	4	4
YKR037C	1.16327	3	4
YKR038C	1.16327	3	4
YKR039W	1.02041	4	4
YKR041W	1.04082	2	2
YKR042W	1.02041	2	2
YKR043C	0.95918	2	2
YKR044W	0.97959	1	2
YKR045C	0.93878	1	2
YKR046C	0.85714	2	2
YKR048C	0.7551	1	2
YKR049C	0.7551	1	2
YKR050W	0.73469	1	2
YKR051W	0.69388	1	2
YKR052C	0.77551	2	2
YKR053C	0.87755	2	2
YKR054C	0.95918	2	2
YKR055W	0.93878	2	2
YKR056W	0.89796	2	2
YKR057W	0.85714	2	2
YKR058W	0.91837	2	2
YKR059W	0.97959	2	2
YKR060W	1.02041	2	2
YKR061W	1.10204	1	2
YKR062W	1.04082	1	2
YKR063C	1.06122	1	2
YKR064W	0.97959	2	2
YKR065C	0.85714	2	2
YKR066C	0.87755	2	2
YKR067W	0.91837	2	2
YKR068C	0.93878	2	2
YKR069W	0.91837	2	2
YKR070W	0.91837	2	2
YKR071C	0.93878	2	2
YKR072C	0.91837	2	2
YKR074W	1	2	2
YKR075C	1	2	2
YKR076W	1	3	2
YKR077W	1.06122	2	2
YKR078W	1.08163	2	2
YKR079C	1.06122	2	2
YKR080W	1.08163	3	2
YKR081C	1.06122	3	2
YKR082W	1.04082	3	2
YKR083C	1.08163	3	2
YKR084C	1.08163	3	2
YKR085C	1.06122	3	2
YKR086W	1.04082	2	2
YKR087C	1.04082	2	2
YKR088C	1.06122	2	2
YKR089C	1	2	2
YKR090W	0.91837	2	2
YKR091W	0.83673	2	2
YKR092C	0.81633	2	2
YKR093W	0.81633	2	2
YKR094C	0.87755	2	2
YKR095W	0.87755	2	2
YKR095W-A	0.95918	2	2
YKR096W	0.93878	2	2
YKR097W	0.95918	2	2
YKR098C	0.89796	2	2
YKR099W	0.83673	2	2
YKR100C	0.85714	2	2
YKR101W	0.79592	2	2
YKR102W	0.55102	2	2
YKR103W	0.61224	3	2
YKR104W	0.65306	3	2
YKR105C	0.67347	3	2
YKR106W	0.69388	4	2

## Sheet: DGY1734_GLC7_CNV
Gene	DGY1657	rel_DGY1734	rel_DGY1734_cor
YER133W	1.08163	2	2
YER134C	0.91837	2	2
YER136W	0.85714	2	2
YER137C	0.83673	2	2
YER137C-A	3.97959	2.5	2
YER138C	3.95918	2.5	2

## Sheet: DGY1736_Gap1_CNV
Gene	DGY1657	rel_DGY1736	rel_DGY1736_cor	CN	Count
YKR018C	1.16327	2	3	1	0
YKR019C	1.12245	2	3	2	29
YKR020W	1.08163	3	3	3	47
YKR021W	1.04082	3	3	4	0
YKR022C	0.97959	3	3
YKR023W	1	3	3
YKR024C	0.95918	3	3
YKR025W	0.95918	3	3
YKR026C	0.95918	3	3
YKR027W	1.04082	3	3
YKR028W	1.08163	3	3
YKR029C	1.10204	3	3
YKR030W	1.14286	2	3
YKR031C	1.12245	2	3
YKR034W	1.10204	3	3
YKR035W-A	1.10204	3	3
YKR036C	1.10204	3	3
YKR037C	1.16327	3	3
YKR038C	1.16327	3	3
YKR039W	1.02041	2	3
YKR041W	1.04082	3	3
YKR042W	1.02041	2	3
YKR043C	0.95918	2	3
YKR044W	0.97959	2	3
YKR045C	0.93878	2	3
YKR046C	0.85714	2	3
YKR048C	0.7551	3	3
YKR049C	0.7551	3	3
YKR050W	0.73469	3	3
YKR051W	0.69388	2	3
YKR052C	0.77551	2	3
YKR053C	0.87755	2	3
YKR054C	0.95918	2	3
YKR055W	0.93878	3	3
YKR056W	0.89796	3	3
YKR057W	0.85714	3	3
YKR058W	0.91837	3	3
YKR059W	0.97959	3	3
YKR060W	1.02041	3	3
YKR061W	1.10204	3	3
YKR062W	1.04082	3	3
YKR063C	1.06122	3	3
YKR064W	0.97959	3	3
YKR065C	0.85714	3	3
YKR066C	0.87755	3	3
YKR067W	0.91837	3	3
YKR068C	0.93878	3	3
YKR069W	0.91837	2	3
YKR070W	0.91837	2	3
YKR071C	0.93878	2	3
YKR072C	0.91837	2	3
YKR074W	1	2	3
YKR075C	1	2	3
YKR076W	1	2	3
YKR077W	1.06122	2	3
YKR078W	1.08163	2	3
YKR079C	1.06122	3	3
YKR080W	1.08163	3	3
YKR081C	1.06122	3	3
YKR082W	1.04082	3	3
YKR083C	1.08163	3	3
YKR084C	1.08163	3	3
YKR085C	1.06122	3	3
YKR086W	1.04082	3	3
YKR087C	1.04082	3	3
YKR088C	1.06122	3	3
YKR089C	1	3	3
YKR090W	0.91837	2	3
YKR091W	0.83673	2	3
YKR092C	0.81633	2	3
YKR093W	0.81633	3	3
YKR094C	0.87755	3	3
YKR095W	0.87755	3	3
YKR095W-A	0.95918	2	3
YKR096W	0.93878	2	3
YKR097W	0.95918	2	3

## Sheet: DGY1740_Gap1_CNV
Gene	DGY1657	rel_DGY1740	rel_DGY1740_cor
YKR029C	1.10204	2	3	2	10
YKR030W	1.14286	2	3	3	7
YKR031C	1.12245	2	3	4	1
YKR034W	1.10204	2	3
YKR035W-A	1.10204	2	3
YKR036C	1.10204	3	3
YKR037C	1.16327	2	3
YKR038C	1.16327	2	3
YKR039W	1.02041	4	4
YKR041W	1.04082	3	3
YKR042W	1.02041	3	3
YKR043C	0.95918	3	3
YKR044W	0.97959	3	3
YKR045C	0.93878	3	3
YKR046C	0.85714	3	3
YKR048C	0.7551	2	3
YKR049C	0.7551	2	3
YKR050W	0.73469	2	3

## Sheet: DGY1744_Gap1_CNV
Gene	DGY1657	rel_DGY1744	rel_DGY1744_cor	CN	Count
YKL004W	0.91837	2	2	1	0
YKL003C	0.97959	2	2	2	36
YKL002W	1.02041	2	2	3	0
YKL001C	0.97959	2	2	4	0
YKR001C	0.95918	2	2
YKR002W	0.95918	2	2
YKR003W	0.95918	2	2
YKR004C	0.89796	2	2
YKR005C	0.93878	2	2
YKR006C	0.91837	2	2
YKR007W	0.93878	2	2
YKR008W	0.93878	2	2
YKR009C	0.85714	2	2
YKR010C	0.87755	2	2
YKR011C	0.95918	2	2
YKR013W	1.02041	2	2
YKR014C	1.12245	2	2
YKR015C	1.14286	2	2
YKR016W	1.10204	2	2
YKR017C	1.14286	2	2
YKR018C	1.16327	2	2
YKR019C	1.12245	2	2
YKR020W	1.08163	2	2
YKR021W	1.04082	2	2
YKR022C	0.97959	2	2
YKR023W	1	2	2
YKR024C	0.95918	2	2
YKR025W	0.95918	2	2
YKR026C	0.95918	2	2
YKR027W	1.04082	2	2
YKR028W	1.08163	2	2
YKR029C	1.10204	2	2
YKR030W	1.14286	2	2
YKR031C	1.12245	2	2
YKR034W	1.10204	2	2
YKR035W-A	1.10204	2	2
YKR036C	1.10204	3	3	2	22
YKR037C	1.16327	3	3	3	39
YKR038C	1.16327	3	3	4	8
YKR039W	1.02041	3	3
YKR041W	1.04082	3	3
YKR042W	1.02041	4	3
YKR043C	0.95918	3	3
YKR044W	0.97959	3	3
YKR045C	0.93878	4	3
YKR046C	0.85714	3	3
YKR048C	0.7551	3	3
YKR049C	0.7551	4	3
YKR050W	0.73469	4	3
YKR051W	0.69388	4	3
YKR052C	0.77551	4	3
YKR053C	0.87755	4	3
YKR054C	0.95918	3	3
YKR055W	0.93878	3	3
YKR056W	0.89796	3	3
YKR057W	0.85714	3	3
YKR058W	0.91837	4	3
YKR059W	0.97959	3	3
YKR060W	1.02041	3	3
YKR061W	1.10204	3	3
YKR062W	1.04082	3	3
YKR063C	1.06122	3	3
YKR064W	0.97959	3	3
YKR065C	0.85714	3	3
YKR066C	0.87755	3	3
YKR067W	0.91837	3	3
YKR068C	0.93878	3	3
YKR069W	0.91837	3	3
YKR070W	0.91837	3	3
YKR071C	0.93878	3	3
YKR072C	0.91837	3	3
YKR074W	1	3	3
YKR075C	1	3	3
YKR076W	1	3	3
YKR077W	1.06122	3	3
YKR078W	1.08163	3	3
YKR079C	1.06122	3	3
YKR080W	1.08163	3	3
YKR081C	1.06122	3	3
YKR082W	1.04082	2	3
YKR083C	1.08163	2	3
YKR084C	1.08163	3	3
YKR085C	1.06122	3	3
YKR086W	1.04082	3	3
YKR087C	1.04082	3	3
YKR088C	1.06122	2	3
YKR089C	1	2	3
YKR090W	0.91837	2	3
YKR091W	0.83673	2	3
YKR092C	0.81633	2	3
YKR093W	0.81633	2	3
YKR094C	0.87755	2	3
YKR095W	0.87755	2	3
YKR095W-A	0.95918	2	3
YKR096W	0.93878	2	3
YKR097W	0.95918	2	3
YKR098C	0.89796	2	3
YKR099W	0.83673	2	3
YKR100C	0.85714	2	3
YKR101W	0.79592	2	3
YKR102W	0.55102	2	3
YKR103W	0.61224	2	3
YKR104W	0.65306	2	3
YKR105C	0.67347	2	3
YKR106W	0.69388	2	3

## Sheet: DGY1747_Gap1_CNV
Gene	DGY1657	rel_DGY1747	rel_DGY1747_cor	CN	Count
YKR002W	0.95918	2	3	1	0
YKR003W	0.95918	3	3	2	5
YKR004C	0.89796	3	3	3	33
YKR005C	0.93878	3	3	4	5
YKR006C	0.91837	3	3
YKR007W	0.93878	3	3
YKR008W	0.93878	3	3
YKR009C	0.85714	3	3
YKR010C	0.87755	3	3
YKR011C	0.95918	3	3
YKR013W	1.02041	3	3
YKR014C	1.12245	3	3
YKR015C	1.14286	3	3
YKR016W	1.10204	3	3
YKR017C	1.14286	2	3
YKR018C	1.16327	3	3
YKR019C	1.12245	3	3
YKR020W	1.08163	3	3
YKR021W	1.04082	3	3
YKR022C	0.97959	4	3
YKR023W	1	4	3
YKR024C	0.95918	3	3
YKR025W	0.95918	3	3
YKR026C	0.95918	4	3
YKR027W	1.04082	3	3
YKR028W	1.08163	3	3
YKR029C	1.10204	4	3
YKR030W	1.14286	4	3
YKR031C	1.12245	3	3
YKR034W	1.10204	3	3
YKR035W-A	1.10204	3	3
YKR036C	1.10204	3	3
YKR037C	1.16327	3	3
YKR038C	1.16327	3	3
YKR039W	1.02041	3	3
YKR041W	1.04082	2	3
YKR042W	1.02041	3	3
YKR043C	0.95918	2	3
YKR044W	0.97959	3	3
YKR045C	0.93878	3	3
YKR046C	0.85714	3	3
YKR048C	0.7551	2	3
YKR049C	0.7551	3	3

## Sheet: DGY1747_GLC7_CNV
Gene	DGY1657	rel_DGY1747	rel_DGY1747_cor
YER133W	1.08163	3	2
YER134C	0.91837	3	2
YER136W	0.85714	2	2
YER137C	0.83673	2	2
YER137C-A	3.97959	2.25	2
YER138C	3.95918	2.25	2

## Sheet: DGY1751_Gap1_CNV
Gene	DGY1657	rel_DGY1751	rel_DGY1751_cor
YKR024C	0.95918	2	3
YKR025W	0.95918	2	3
YKR026C	0.95918	3	3
YKR027W	1.04082	3	3
YKR028W	1.08163	3	3
YKR029C	1.10204	3	3
YKR030W	1.14286	3	3
YKR031C	1.12245	3	3
YKR034W	1.10204	3	3
YKR035W-A	1.10204	3	3
YKR036C	1.10204	3	3
YKR037C	1.16327	3	3
YKR038C	1.16327	3	3
YKR039W	1.02041	3	3
YKR041W	1.04082	3	3
YKR042W	1.02041	2	2
YKR043C	0.95918	2	2
YKR044W	0.97959	2	2
YKR045C	0.93878	2	2
YKR046C	0.85714	2	2
YKR048C	0.7551	2	2
YKR049C	0.7551	2	2
YKR050W	0.73469	2	2
YKR051W	0.69388	2	2
YKR052C	0.77551	2	2
YKR053C	0.87755	2	2
YKR054C	0.95918	2	2
YKR055W	0.93878	2	2
YKR056W	0.89796	2	2
YKR057W	0.85714	2	2
YKR058W	0.91837	2	2
YKR059W	0.97959	2	2
YKR060W	1.02041	2	2
YKR061W	1.10204	2	2
YKR062W	1.04082	2	2
YKR063C	1.06122	2	2
YKR064W	0.97959	2	2
YKR065C	0.85714	2	2
YKR066C	0.87755	2	2
YKR067W	0.91837	2	2
YKR068C	0.93878	2	2
YKR069W	0.91837	2	2
YKR070W	0.91837	2	2
YKR071C	0.93878	2	2
YKR072C	0.91837	2	2
YKR074W	1	2	2
YKR075C	1	2	2
YKR076W	1	2	2
YKR077W	1.06122	2	2
YKR078W	1.08163	2	2
YKR079C	1.06122	2	2
YKR080W	1.08163	2	2
YKR081C	1.06122	2	2
YKR082W	1.04082	2	2
YKR083C	1.08163	2	2
YKR084C	1.08163	2	2
YKR085C	1.06122	2	2
YKR086W	1.04082	2	2
YKR087C	1.04082	2	2
YKR088C	1.06122	2	2
YKR089C	1	2	2
YKR090W	0.91837	2	2
YKR091W	0.83673	2	2
YKR092C	0.81633	2	2
