# Supplementary material for: Copy number variation alters local and global mutational tolerance
Source: HighWire-hosted journal article supplement (doi:10.1101/gr.277625.122), 2023-08-01
Supplement: Supplemental_Tables.zip [file Supplemental_Table_S18.xlsx]

## Sheet: 1728
gene	baseMean	log2FoldChange	lfcSE	stat	pvalue	padj
YDR159W	130.417	4.56585	0.428921	10.645	1.84057e-26	6.83589e-23
YHR164C	149.861	-4.96176	0.529292	-9.37434	6.96074e-21	1.29261e-17
YOR153W	99.7576	2.74465	0.405571	6.76736	1.31153e-11	1.62368e-08
YKL182W	81.1635	2.57844	0.437417	5.89468	3.754e-09	3.48559e-06
YER177W	26.0803	8.43816	1.57496	5.3577	8.42895e-08	6.26102e-05
YKL060C	21.7695	8.17751	1.59768	5.11836	3.08208e-07	0.000190781
YLR256W	121.413	1.68064	0.350582	4.79388	1.63588e-06	0.000867952
YKR001C	23.3743	4.09533	0.876723	4.67118	2.99481e-06	0.00135249
YKR042W	24.9961	3.92423	0.843445	4.65262	3.27745e-06	0.00135249
YIL072W	39.0339	-3.25287	0.715038	-4.54923	5.38422e-06	0.0019997
YKL054C	18.2168	4.81086	1.11519	4.31396	1.60359e-05	0.00541429
YKL056C	11.4236	7.24722	1.74133	4.16188	3.1564e-05	0.00976907
YLR056W	23.2689	3.10781	0.793225	3.91794	8.93095e-05	0.025515
YNL291C	44.7946	-2.39093	0.624194	-3.83043	0.00012792	0.0339354
YMR216C	28.3712	2.42601	0.67963	3.56961	0.000357518	0.0885215
YKL152C	16.844	3.30215	0.937744	3.52137	0.000429318	0.0996554
YGL064C	15.6149	3.42469	0.989158	3.46222	0.000535729	0.117041
YKR041W	66.0997	1.54677	0.457923	3.3778	0.000730693	0.150766
YKL112W	27.6604	2.27841	0.682127	3.34015	0.000837327	0.155492
YKR004C	15.8932	3.22849	0.96656	3.34019	0.000837224	0.155492
YML028W	21.5986	-2.97966	0.900125	-3.31028	0.00093203	0.164836
YKL125W	17.2611	3.04422	0.934726	3.25681	0.00112673	0.188972
YAL056W	68.8194	-1.57672	0.485739	-3.24603	0.00117026	0.188972
YKL057C	18.8312	2.70361	0.842716	3.20821	0.00133563	0.206689
YKL148C	51.1408	1.6318	0.514688	3.17046	0.00152199	0.226107
YKL186C	13.6751	3.19383	1.03676	3.08059	0.00206589	0.295104
YIR002C	57.974	-1.59755	0.520533	-3.06907	0.00214724	0.295364
YDR277C	32.1544	1.88716	0.629171	2.99944	0.00270475	0.358766
YKL035W	26.0748	2.0945	0.707855	2.95894	0.00308698	0.395347
YLR142W	21.5277	2.26788	0.787017	2.88161	0.00395645	0.487261
YKL128C	29.7849	1.85761	0.646595	2.87291	0.00406707	0.487261
YLL001W	61.8745	-1.35441	0.484344	-2.79638	0.00516783	0.599791
YKL073W	14.0663	2.72118	0.981736	2.7718	0.00557467	0.627404
YER155C	60.7606	-1.36313	0.496418	-2.74593	0.00603402	0.63696
YER001W	87.1269	-1.15414	0.419105	-2.75383	0.00589027	0.63696
YAR050W	31.3079	-1.82424	0.666173	-2.73839	0.00617409	0.63696
YKR002W	11.9508	2.95223	1.08993	2.70866	0.00675565	0.678121
YOR043W	15.6016	-2.74543	1.0291	-2.66779	0.00763517	0.691635
YKL104C	27.4412	1.88156	0.702208	2.67949	0.00737349	0.691635
YCR033W	37.6112	-1.64518	0.611316	-2.69121	0.00711932	0.691635
YPL269W	30.6627	-1.78781	0.668762	-2.67332	0.00751056	0.691635
YKL045W	22.6402	1.94093	0.733469	2.64623	0.00813945	0.71976
YPL230W	11.4311	2.90813	1.11425	2.60994	0.00905573	0.737583
YLL019C	12.3176	2.73966	1.05379	2.59981	0.00932757	0.737583
YNR001C	51.8256	-1.36934	0.522186	-2.62233	0.00873312	0.737583
YAL031C	30.2833	-1.76156	0.677635	-2.59957	0.00933398	0.737583
YKR093W	61.0258	1.24068	0.477206	2.59988	0.00932553	0.737583
YIL154C	25.6254	-2.0138	0.776921	-2.59203	0.00954121	0.738251
YKL145W	14.496	2.40122	0.953946	2.51714	0.011831	0.862613
YKL022C	22.3863	1.87996	0.746989	2.51672	0.0118453	0.862613
YFL033C	84.6857	-1.07896	0.427352	-2.52475	0.011578	0.862613
YKL032C	22.576	1.82853	0.730369	2.50357	0.0122946	0.866317
YCR023C	42.8648	-1.43316	0.572892	-2.50162	0.0123626	0.866317
YAL001C	20.0698	-2.05444	0.831296	-2.47137	0.0134597	0.908898
YKR054C	118.134	0.863292	0.349206	2.47216	0.0134301	0.908898
YCL044C	12.2355	-3.14781	1.27793	-2.46322	0.0137697	0.913223
YAL024C	18.7536	-2.11242	0.866868	-2.43684	0.014816	0.9472
YKL002W	13.7482	2.40371	0.993309	2.41991	0.0155245	0.9472
YLR091W	14.1919	2.38909	0.984677	2.42627	0.0152551	0.9472
YKL165C	30.2249	1.54309	0.637865	2.41914	0.0155571	0.9472
YCL018W	21.9684	-1.90797	0.785708	-2.42834	0.0151681	0.9472
YGR132C	8.80585	-4.31461	1.80179	-2.39463	0.0166372	0.987076
YKL021C	12.342	2.46905	1.03459	2.3865	0.0170094	0.987076
YNR016C	41.4099	-1.37601	0.575612	-2.39051	0.0168251	0.987076
YKL191W	23.2086	1.73628	0.729792	2.37914	0.0173529	0.991516
YPL141C	29.8149	-0.056614	0.632632	-0.0894896	0.928693	0.999774
YPR030W	31.8803	0.107706	0.624957	0.172341	0.86317	0.999774
YPL068C	9.96822	1.20329	1.15675	1.04023	0.298232	0.999774
YOL030W	19.7094	-0.493252	0.769342	-0.641136	0.521435	0.999774
YDL054C	29.7676	0.269153	0.629908	0.427289	0.669169	0.999774
YIL123W	18.8899	0.06607	0.784856	0.084181	0.932913	0.999774
YJR153W	7.92219	-1.65074	1.36246	-1.21159	0.225668	0.999774
YJR152W	11.5103	0.47718	1.016	0.469667	0.638593	0.999774
YJR155W	13.8888	0.0428675	0.923213	0.046433	0.962965	0.999774
YJR154W	10.7597	-0.514174	1.06648	-0.482124	0.629718	0.999774
YBL069W	25.1158	-0.336956	0.682879	-0.493434	0.621706	0.999774
YBL066C	35.8938	0.100095	0.585774	0.170877	0.86432	0.999774
YBL074C	11.9274	0.295819	0.99301	0.297902	0.765778	0.999774
YBL063W	35.77	-0.804532	0.597433	-1.34665	0.178094	0.999774
YBL064C	14.9679	0.603305	0.877483	0.68754	0.491743	0.999774
YOL031C	17.1921	-0.144551	0.840684	-0.171945	0.863481	0.999774
YDL051W	15.5062	-0.600671	0.922473	-0.651153	0.514948	0.999774
YIL130W	31.1017	-0.536658	0.625047	-0.858588	0.390568	0.999774
YKR039W	22.1112	0.749286	0.724464	1.03426	0.301013	0.999774
YPL171C	31.0013	-0.435948	0.641961	-0.679088	0.497082	0.999774
YIL129C	47.0347	-0.858425	0.546652	-1.57033	0.116338	0.999774
YOR320C	12.4213	0.30199	0.969821	0.311387	0.755507	0.999774
YOR014W	13.6851	-0.217158	0.937962	-0.231521	0.81691	0.999774
YLR099C	15.9018	0.0335285	0.851249	0.0393874	0.968582	0.999774
YPL070W	14.7997	-0.0891098	0.887295	-0.100429	0.920004	0.999774
YOL032W	8.8611	-0.453537	1.17508	-0.385962	0.699525	0.999774
YDL052C	14.4483	0.513983	0.897223	0.57286	0.56674	0.999774
YMR001C-A	9.75659	-2.00386	1.21367	-1.65108	0.0987219	0.999774
YCL057W	41.3026	-0.696262	0.576567	-1.2076	0.227201	0.999774
YPR108W	8.11047	-3.15672	1.52423	-2.07102	0.0383571	0.999774
YKL090W	31.4654	0.368337	0.631394	0.583371	0.559644	0.999774
YKL091C	14.8166	0.716519	0.882719	0.811718	0.416953	0.999774
YKL088W	12.9962	1.36853	0.957793	1.42883	0.153052	0.999774
YKL086W	51.7762	0.410073	0.50187	0.81709	0.413877	0.999774
YKL087C	22.4336	1.45423	0.727623	1.99861	0.0456509	0.999774
YKL084W	28.7889	-0.119589	0.643531	-0.185832	0.852576	0.999774
YKL085W	20.0856	0.84092	0.754093	1.11514	0.26479	0.999774
YKL081W	18.7501	1.8325	0.816628	2.24398	0.0248338	0.999774
YKL082C	9.15627	0.828155	1.14501	0.723275	0.469511	0.999774
YKR029C	14.9797	0.452531	0.917159	0.493406	0.621726	0.999774
YNL196C	15.7748	-0.033811	0.855389	-0.0395271	0.96847	0.999774
YML001W	11.6003	0.804056	1.01266	0.794	0.427195	0.999774
YPL270W	24.7156	0.263122	0.681275	0.38622	0.699334	0.999774
YML002W	39.4776	0.160675	0.587454	0.27351	0.784461	0.999774
YPR007C	20.3883	0.673648	0.747336	0.901399	0.367376	0.999774
YDL213C	10.7368	0.175069	1.04895	0.166899	0.867449	0.999774
YNL301C	17.3797	-0.598137	0.822919	-0.726848	0.467319	0.999774
YOR373W	13.7876	0.0732763	0.920565	0.0795993	0.936556	0.999774
YPL228W	8.46983	-0.0179248	1.19593	-0.0149881	0.988042	0.999774
YPL072W	12.7602	-0.417645	0.99625	-0.419217	0.675057	0.999774
YPL207W	29.234	0.0849022	0.634169	0.133879	0.893498	0.999774
YDR032C	11.8772	0.399221	1.00281	0.398101	0.690556	0.999774
YNL219C	10.8379	0.136826	1.08752	0.125814	0.899879	0.999774
YJL141C	26.8558	-1.31476	0.724053	-1.81583	0.0693957	0.999774
YDL218W	13.2924	-0.275776	0.94195	-0.292772	0.769696	0.999774
YIL014W	12.2147	-0.745443	0.997998	-0.746939	0.455101	0.999774
YIL013C	35.1005	-0.668845	0.597683	-1.11906	0.263113	0.999774
YIL010W	12.493	-0.79266	0.987389	-0.802784	0.422099	0.999774
YIL009C-A	12.4826	-0.164283	0.999136	-0.164425	0.869397	0.999774
YIL009W	36.4425	-0.643707	0.587554	-1.09557	0.273267	0.999774
YIL007C	13.6209	-0.433995	0.940314	-0.461542	0.644409	0.999774
YIL006W	20.2122	-1.17772	0.780109	-1.50968	0.131125	0.999774
YPL214C	17.6749	0.131745	0.804298	0.163801	0.869888	0.999774
YGL073W	17.6734	-0.11116	0.808286	-0.137526	0.890615	0.999774
YGL071W	12.6856	-0.0659906	0.962309	-0.0685753	0.945328	0.999774
YGL067W	10.0916	0.329249	1.08866	0.302435	0.76232	0.999774
YGL066W	11.7732	-0.281398	1.01506	-0.277221	0.78161	0.999774
YGL065C	9.75659	-2.00386	1.21367	-1.65108	0.0987219	0.999774
YLL051C	23.172	0.40446	0.71301	0.567257	0.57054	0.999774
YLL052C	9.1254	-1.09747	1.18473	-0.92635	0.354264	0.999774
YLL053C	11.5605	0.372036	1.01247	0.367456	0.713279	0.999774
YLL054C	11.6373	0.554286	1.02215	0.542273	0.587631	0.999774
YJL036W	11.0025	0.136368	1.05057	0.129804	0.896721	0.999774
YJL037W	14.1789	-0.189952	0.910194	-0.208694	0.834687	0.999774
YJL034W	8.34288	-0.149462	1.21036	-0.123486	0.901722	0.999774
YJL042W	69.1817	-1.03873	0.464756	-2.23499	0.0254179	0.999774
YJL039C	15.9735	-0.862977	0.868234	-0.993946	0.320249	0.999774
YDR011W	53.143	1.01687	0.497094	2.04564	0.0407921	0.999774
YLR263W	13.036	1.75333	0.968395	1.81055	0.0702103	0.999774
YJL033W	9.03538	-1.8916	1.255	-1.50724	0.131748	0.999774
YLR266C	22.7405	-1.83771	0.776089	-2.36791	0.0178888	0.999774
YPR155C	23.9022	-0.113959	0.695314	-0.163896	0.869813	0.999774
YOL028C	10.5442	-0.629523	1.08145	-0.582108	0.560494	0.999774
YMR169C	17.4593	0.0811033	0.809833	0.100148	0.920227	0.999774
YJR127C	87.529	-0.694617	0.408674	-1.69969	0.08919	0.999774
YMR170C	12.5866	0.462691	0.991371	0.466718	0.640701	0.999774
YBR238C	11.6771	0.970797	1.02993	0.942584	0.345894	0.999774
YJR019C	20.8925	0.370775	0.738968	0.501747	0.615846	0.999774
YJR021C	13.5965	-0.207417	0.933597	-0.22217	0.824182	0.999774
YGL104C	11.5067	-0.476109	1.0556	-0.45103	0.651968	0.999774
YBR237W	8.79546	-1.54624	1.24945	-1.23754	0.215887	0.999774
YPL074W	19.3196	-0.0619278	0.77012	-0.0804131	0.935909	0.999774
YDR057W	13.268	-0.0543128	0.938537	-0.0578697	0.953852	0.999774
YOR386W	9.63611	0.436064	1.11254	0.391954	0.695092	0.999774
YOR384W	27.6122	-0.0388416	0.651869	-0.0595849	0.952486	0.999774
YOR385W	10.6342	-0.190032	1.06048	-0.179195	0.857785	0.999774
YOR381W	15.4707	-0.0867212	0.865107	-0.100243	0.920151	0.999774
YOR378W	21.9917	0.056999	0.724048	0.0787228	0.937253	0.999774
YOR380W	26.1831	0.128074	0.666517	0.192153	0.847622	0.999774
YGR250C	24.4433	-0.543392	0.694282	-0.782668	0.433822	0.999774
YGR252W	9.92984	1.10803	1.10736	1.00061	0.317018	0.999774
YGR248W	9.82727	0.773723	1.10056	0.703025	0.48204	0.999774
YJR104C	14.1531	-0.300471	0.912097	-0.329428	0.741832	0.999774
YJR103W	52.0968	-0.0703329	0.500684	-0.140474	0.888286	0.999774
YJR106W	19.104	-0.11257	0.775103	-0.145233	0.884527	0.999774
YJR024C	10.3301	-0.277137	1.07631	-0.257487	0.796803	0.999774
YGR254W	27.6277	0.254838	0.65176	0.391	0.695797	0.999774
YGR255C	17.1463	0.644304	0.820765	0.785004	0.432451	0.999774
YJR110W	36.271	-0.113731	0.592484	-0.191957	0.847776	0.999774
YJR109C	42.2082	-0.141442	0.548959	-0.257656	0.796673	0.999774
YDR366C	8.44545	0.305062	1.1974	0.25477	0.7989	0.999774
YOR289W	13.0833	1.05361	0.951236	1.10762	0.268026	0.999774
YOR284W	8.31705	-0.336238	1.22381	-0.274747	0.78351	0.999774
YOR285W	12.8782	0.535872	0.960227	0.558068	0.576798	0.999774
YOR212W	23.4209	-0.139144	0.70351	-0.197786	0.843212	0.999774
YMR271C	7.86159	-0.225411	1.27074	-0.177386	0.859205	0.999774
YOR291W	39.0193	-0.0383536	0.586564	-0.0653869	0.947866	0.999774
YOR037W	11.5272	1.45989	1.02392	1.42578	0.153932	0.999774
YPL066W	17.9162	0.260833	0.808935	0.32244	0.747119	0.999774
YOR177C	13.4717	0.199508	0.974059	0.204821	0.837712	0.999774
YMR190C	25.6279	0.343491	0.677267	0.507173	0.612034	0.999774
YPR156C	17.5479	0.0733408	0.810281	0.0905128	0.92788	0.999774
YOR179C	18.6382	0.29358	0.791487	0.370921	0.710696	0.999774
YGR111W	11.6233	0.237422	1.00455	0.236347	0.813164	0.999774
YOL054W	10.3867	1.36137	1.0849	1.25484	0.209537	0.999774
YGR106C	7.96416	0.260849	1.3073	0.199533	0.841846	0.999774
YGR108W	9.15339	-0.0462422	1.20387	-0.0384112	0.96936	0.999774
YGR109C	10.5366	0.819888	1.06556	0.769441	0.441632	0.999774
YGR109W-B	33.9783	-0.23055	0.602651	-0.382559	0.702047	0.999774
YDR319C	9.01388	-0.140931	1.1626	-0.121221	0.903516	0.999774
YDR317W	9.06768	0.845795	1.15918	0.72965	0.465604	0.999774
YIL026C	19.8969	-0.939433	0.789112	-1.19049	0.233853	0.999774
YDR316W	14.9141	0.00268813	0.889045	0.00302362	0.997588	0.999774
YDR314C	10.801	0.408836	1.04397	0.391617	0.695341	0.999774
YIL035C	26.3552	-0.488993	0.678763	-0.720419	0.471267	0.999774
YIL034C	33.5379	-1.38379	0.627773	-2.20429	0.0275038	0.999774
YIL037C	18.9512	-0.254025	0.780069	-0.325644	0.744694	0.999774
YIL036W	27.4358	0.0440806	0.690074	0.0638781	0.949067	0.999774
YIL030C	34.4657	-0.884472	0.610179	-1.44953	0.14719	0.999774
YIL033C	11.3037	-0.602797	1.03429	-0.582815	0.560018	0.999774
YNL125C	20.3255	0.749196	0.749889	0.999075	0.317758	0.999774
YML041C	10.7353	-0.226023	1.06757	-0.211717	0.832328	0.999774
YML042W	29.4054	-0.543469	0.653571	-0.831539	0.405669	0.999774
YNL121C	10.556	-0.950656	1.10519	-0.860173	0.389694	0.999774
YML035C	25.0003	0.939055	0.690492	1.35998	0.173836	0.999774
YDR370C	8.72375	0.220835	1.193	0.185109	0.853143	0.999774
YNL118C	8.46983	-0.0179248	1.19593	-0.0149881	0.988042	0.999774
YNL119W	10.2185	0.421679	1.07579	0.39197	0.69508	0.999774
YPL088W	12.2825	0.414285	1.02506	0.404157	0.686097	0.999774
YDR371W	18.0174	0.235677	0.79565	0.296207	0.767072	0.999774
YNL305C	10.9293	0.851604	1.04208	0.817219	0.413804	0.999774
YOL025W	14.1656	-0.316318	0.957624	-0.330315	0.741162	0.999774
YNL051W	9.06408	-0.30266	1.21831	-0.248426	0.803805	0.999774
YHR131C	22.837	-0.347376	0.719757	-0.48263	0.629359	0.999774
YAR031W	12.5586	-0.154614	0.97319	-0.158873	0.873769	0.999774
YDL222C	31.7666	0.129758	0.616212	0.210574	0.83322	0.999774
YPL232W	15.5873	0.40203	0.895119	0.449135	0.653334	0.999774
YIL103W	15.6812	-1.19243	0.899739	-1.32531	0.185068	0.999774
YMR076C	21.0618	-0.862601	0.759676	-1.13549	0.256172	0.999774
YMR075W	12.0684	0.674182	1.0034	0.671899	0.501648	0.999774
YDR492W	12.4826	-0.164283	0.999136	-0.164425	0.869397	0.999774
YDR490C	42.5905	0.0386265	0.544564	0.0709311	0.943453	0.999774
YDR497C	44.8291	0.686543	0.540255	1.27078	0.203808	0.999774
YDR496C	11.5745	0.685033	1.01092	0.677631	0.498006	0.999774
YDR495C	9.98756	-0.512188	1.10455	-0.463709	0.642857	0.999774
YFR025C	33.7768	-0.135383	0.599296	-0.225903	0.821277	0.999774
YFR024C-A	16.5846	-0.125872	0.865521	-0.145429	0.884372	0.999774
YFR026C	14.0365	-0.994675	0.945947	-1.05151	0.293023	0.999774
YFR029W	31.4621	-1.41739	0.645826	-2.1947	0.0281852	0.999774
YFR031C	22.2998	-1.33964	0.757914	-1.76754	0.0771377	0.999774
YFR030W	29.254	-0.477982	0.652034	-0.733063	0.46352	0.999774
YFR032C	9.44352	-0.409583	1.13413	-0.361143	0.717993	0.999774
YOL004W	23.7096	-0.482269	0.702268	-0.68673	0.492253	0.999774
YMR186W	14.5537	1.28412	0.901414	1.42457	0.154283	0.999774
YMR185W	12.366	-0.917769	0.997023	-0.92051	0.357306	0.999774
YER053C	20.8771	-0.014184	0.742862	-0.0190937	0.984766	0.999774
YER052C	10.2874	-2.46165	1.24657	-1.97474	0.0482981	0.999774
YER051W	14.7997	-0.0891098	0.887295	-0.100429	0.920004	0.999774
YER056C	19.9497	1.29644	0.762724	1.69974	0.089179	0.999774
YER055C	16.7396	0.40525	0.828065	0.489394	0.624563	0.999774
YER054C	23.8351	-0.636193	0.709192	-0.897068	0.369683	0.999774
YER057C	7.86303	0.313931	1.24494	0.252165	0.800914	0.999774
YNL199C	10.4046	-0.746253	1.11356	-0.670152	0.502761	0.999774
YPR078C	26.012	-0.67106	0.697852	-0.961607	0.336247	0.999774
YOR197W	15.244	0.149859	0.924045	0.162177	0.871167	0.999774
YDR268W	9.80288	1.02963	1.10587	0.931061	0.351822	0.999774
YDR266C	9.85165	0.514154	1.09935	0.467691	0.640006	0.999774
YDR264C	18.6346	-0.290042	0.794469	-0.365076	0.715054	0.999774
YDR263C	10.7522	0.881153	1.05486	0.835329	0.403533	0.999774
YDR262W	7.96704	1.23739	1.24589	0.993178	0.320623	0.999774
YDL002C	11.9339	1.76991	1.019	1.7369	0.0824052	0.999774
YBR106W	9.57983	2.53621	1.18883	2.13337	0.0328942	0.999774
YBR104W	16.5943	-0.721224	0.856607	-0.841954	0.399814	0.999774
YBR105C	23.144	0.0762748	0.704966	0.108196	0.91384	0.999774
YBR102C	15.2885	-1.29296	0.90765	-1.42452	0.154297	0.999774
YBR098W	20.3022	-0.887808	0.769163	-1.15425	0.248397	0.999774
YBR097W	10.9229	-1.01443	1.08236	-0.937242	0.348634	0.999774
YMR029C	10.1956	1.05747	1.09477	0.965925	0.334082	0.999774
YAR023C	13.9006	-0.143033	0.92907	-0.153953	0.877647	0.999774
YMR257C	8.72519	0.676263	1.17454	0.575766	0.564773	0.999774
YOR040W	20.4371	0.421749	0.746014	0.565336	0.571845	0.999774
YDL240W	17.4321	-0.255955	0.829908	-0.308414	0.757767	0.999774
YOR193W	7.84904	-0.194229	1.27191	-0.152706	0.87863	0.999774
YPR083W	19.0104	-1.05871	0.808715	-1.30912	0.190493	0.999774
YMR262W	10.3057	0.00524372	1.07386	0.00488304	0.996104	0.999774
YBL106C	25.7728	-0.50642	0.688147	-0.735919	0.46178	0.999774
YHR108W	14.0659	0.0234189	0.908704	0.0257718	0.979439	0.999774
YBR030W	10.9279	0.492686	1.04122	0.473181	0.636084	0.999774
YBR026C	10.6023	1.414	1.07454	1.31591	0.188204	0.999774
YBR028C	11.232	0.546315	1.0227	0.53419	0.59321	0.999774
YBR034C	28.3489	0.203811	0.64306	0.316939	0.75129	0.999774
YBR035C	12.9822	1.10169	0.968998	1.13693	0.255566	0.999774
YBR033W	37.3767	0.226595	0.573028	0.395435	0.692522	0.999774
YBR036C	14.4956	-0.147092	0.902909	-0.162908	0.870591	0.999774
YDR033W	15.7246	0.0507309	0.865128	0.0586397	0.953239	0.999774
YOL155C	27.7776	0.0430554	0.660301	0.0652057	0.94801	0.999774
YGR136W	14.3672	-0.556221	0.920816	-0.604052	0.545809	0.999774
YOL156W	9.63467	0.00790377	1.11673	0.00707761	0.994353	0.999774
YOL157C	10.4599	0.628388	1.0899	0.576554	0.564241	0.999774
YOL152W	47.2499	0.0540678	0.522391	0.103501	0.917566	0.999774
YGL202W	20.6755	0.132874	0.742611	0.178928	0.857995	0.999774
YDL234C	17.0681	0.288202	0.818267	0.35221	0.724681	0.999774
YGL198W	7.83865	0.643404	1.25162	0.514059	0.607211	0.999774
YMR237W	22.7233	-0.319936	0.729182	-0.438759	0.660836	0.999774
YGL200C	10.598	0.308226	1.12024	0.275142	0.783208	0.999774
YPL135W	15.6005	0.511589	0.86627	0.590566	0.554812	0.999774
YGL205W	31.1842	0.128645	0.622362	0.206705	0.83624	0.999774
YGR143W	33.9295	-0.0579486	0.599196	-0.0967106	0.922956	0.999774
YKR028W	42.1275	0.411502	0.546216	0.753368	0.451229	0.999774
YMR195W	10.2081	1.01524	1.11512	0.910433	0.362594	0.999774
YGL203C	29.0532	-0.290054	0.646265	-0.448817	0.653564	0.999774
YKR027W	32.0478	0.365056	0.623611	0.585391	0.558285	0.999774
YMR044W	19.5799	0.959014	0.779105	1.23092	0.218354	0.999774
YMR238W	16.0944	0.50893	0.844629	0.602549	0.546809	0.999774
YKR026C	13.0923	0.28585	0.942497	0.30329	0.761669	0.999774
YKL201C	58.8115	0.768052	0.499206	1.53855	0.123915	0.999774
YKL198C	258.209	0.53521	0.243666	2.19649	0.0280567	0.999774
YKL197C	58.2388	0.636649	0.479041	1.32901	0.183846	0.999774
YKL196C	10.9218	2.18452	1.099	1.98773	0.046841	0.999774
YKL194C	21.3803	1.20946	0.743096	1.62759	0.103611	0.999774
YKL193C	12.2638	1.92746	1.04137	1.85089	0.0641856	0.999774
YKR024C	18.8232	1.41571	0.789492	1.79319	0.0729432	0.999774
YPL125W	18.3304	-0.342	0.797619	-0.428776	0.668087	0.999774
YDL174C	39.2743	0.99037	0.567945	1.74378	0.0811981	0.999774
YIL050W	10.897	-1.20642	1.07998	-1.11707	0.263962	0.999774
YKR023W	17.5619	0.292697	0.807201	0.362607	0.716898	0.999774
YBL079W	24.9504	-0.442638	0.69711	-0.634962	0.525453	0.999774
YBL081W	9.03826	-0.482058	1.17352	-0.410781	0.681233	0.999774
YBL080C	16.7654	0.488756	0.828247	0.590109	0.555118	0.999774
YBL084C	7.9118	-0.412701	1.2536	-0.329212	0.741996	0.999774
YBL082C	22.4214	-0.0520392	0.727036	-0.0715773	0.942938	0.999774
YBL085W	14.951	-0.209248	0.88577	-0.236233	0.813252	0.999774
YIL056W	38.4591	-0.287152	0.575968	-0.498556	0.618093	0.999774
YKR021W	34.607	0.482598	0.591124	0.816409	0.414266	0.999774
YBL075C	22.2191	-0.0153011	0.724868	-0.0211088	0.983159	0.999774
YPL231W	15.1142	-0.524673	0.894973	-0.586244	0.557711	0.999774
YBR175W	10.7766	0.647347	1.04735	0.618078	0.536524	0.999774
YPR161C	8.88692	-0.27165	1.18621	-0.229007	0.818863	0.999774
YDL178W	20.3449	-0.0880257	0.776307	-0.11339	0.909721	0.999774
YPR167C	9.14227	0.43563	1.16265	0.374687	0.707893	0.999774
YDR101C	7.8157	1.46699	1.26857	1.15642	0.24751	0.999774
YPL060W	22.8887	-0.209444	0.711583	-0.294335	0.768502	0.999774
YDL161W	8.65955	-0.0797872	1.20724	-0.0660907	0.947306	0.999774
YOL011W	32.1063	-0.0761564	0.613099	-0.124216	0.901145	0.999774
YLR360W	8.38125	-0.00171522	1.20828	-0.00141955	0.998867	0.999774
YOL009C	14.3302	-0.31846	0.905678	-0.351626	0.725119	0.999774
YLR096W	12.6522	0.957576	0.966976	0.990279	0.322038	0.999774
YPR168W	11.6462	-0.385488	1.01562	-0.37956	0.704272	0.999774
YOL013W-A	11.128	-0.157249	1.03267	-0.152275	0.87897	0.999774
YOR316C	28.6361	-0.212933	0.642999	-0.331157	0.740526	0.999774
YPL175W	12.4944	-0.386519	0.977622	-0.395367	0.692572	0.999774
YKL117W	9.26028	1.61588	1.15708	1.39651	0.162561	0.999774
YKL116C	12.0225	1.75338	1.01079	1.73467	0.082799	0.999774
YKL114C	19.1474	0.692767	0.805835	0.859689	0.389961	0.999774
YKL124W	20.3987	0.369071	0.753836	0.48959	0.624424	0.999774
YKL121W	23.5263	0.379691	0.696744	0.544951	0.585787	0.999774
YKL120W	8.54802	0.712914	1.21536	0.586589	0.55748	0.999774
YDL159W	19.2464	0.36326	0.769455	0.4721	0.636856	0.999774
YOL013C	15.1716	0.793901	0.933601	0.850364	0.395123	0.999774
YKL113C	12.3008	1.65044	1.00223	1.64677	0.0996058	0.999774
YPL063W	10.1787	-0.100976	1.08223	-0.0933036	0.925662	0.999774
YOL115W	20.9718	-1.13878	0.763516	-1.4915	0.13583	0.999774
YPL022W	11.8388	0.307809	0.994507	0.309509	0.756935	0.999774
YLR375W	23.6669	-1.26313	0.732449	-1.72453	0.0846126	0.999774
YLR371W	17.568	-0.93256	0.838854	-1.11171	0.266264	0.999774
YLR372W	8.35079	2.5976	1.2946	2.0065	0.0448034	0.999774
YKR084C	17.6444	1.30342	0.825611	1.57873	0.114397	0.999774
YKR085C	14.5308	1.74636	0.930257	1.87729	0.0604784	0.999774
YLR376C	13.1676	0.147358	1.01004	0.145893	0.884006	0.999774
YLR377C	30.2991	0.240593	0.635595	0.378532	0.705035	0.999774
YKR080W	17.851	1.91802	0.829406	2.31252	0.0207489	0.999774
YKR082W	32.235	1.20025	0.613217	1.9573	0.0503126	0.999774
YKR076W	34.0246	0.487704	0.595647	0.81878	0.412912	0.999774
YKR077W	19.0796	0.0365502	0.773562	0.0472493	0.962315	0.999774
YKR078W	22.3245	0.521558	0.741528	0.703357	0.481834	0.999774
YKR079C	22.5222	1.44593	0.732824	1.9731	0.0484844	0.999774
YIL017C	37.2677	-0.417162	0.583049	-0.715484	0.47431	0.999774
YIL019W	9.94919	-0.663358	1.1308	-0.586627	0.557454	0.999774
YIL021W	12.2132	-1.22602	1.01945	-1.20262	0.229122	0.999774
YIL023C	18.2175	-0.169917	0.794455	-0.213879	0.830641	0.999774
YIL015W	26.6991	-0.221921	0.676338	-0.328122	0.74282	0.999774
YGL056C	24.2432	-0.210552	0.692848	-0.303894	0.761209	0.999774
YGL059W	17.6609	-0.0957705	0.817337	-0.117174	0.906722	0.999774
YGL060W	11.3206	0.533078	1.02065	0.522294	0.601466	0.999774
YGL062W	63.7381	0.778808	0.474903	1.63993	0.10102	0.999774
YGL063W	113.009	0.361458	0.355602	1.01647	0.309407	0.999774
YHR138C	8.65955	-0.0797872	1.20724	-0.0660907	0.947306	0.999774
YHR137W	10.5944	-0.789853	1.07937	-0.731773	0.464307	0.999774
YJL048C	19.0811	0.256222	0.777162	0.329689	0.741635	0.999774
YJL047C	12.1171	0.246508	0.987339	0.249669	0.802843	0.999774
YLR207W	32.192	-0.361118	0.623322	-0.579345	0.562356	0.999774
YPL217C	14.5045	-1.06496	0.922096	-1.15494	0.248117	0.999774
YLR361C	24.5642	0.33218	0.683218	0.486199	0.626826	0.999774
YPL170W	14.0814	0.580225	0.908034	0.63899	0.522829	0.999774
YOL016C	14.9127	-0.296905	0.885306	-0.33537	0.737346	0.999774
YLR259C	10.3301	-0.277137	1.07631	-0.257487	0.796803	0.999774
YLR257W	18.0726	0.930147	0.79899	1.16415	0.244362	0.999774
YLR203C	14.3317	-0.00528447	0.912416	-0.00579173	0.995379	0.999774
YLR205C	19.3673	1.33087	0.775591	1.71595	0.0861716	0.999774
YLR206W	8.3723	1.20713	1.25103	0.964903	0.334594	0.999774
YDR075W	9.5321	-0.423014	1.12844	-0.374867	0.70776	0.999774
YCL028W	12.2929	-0.122692	0.982073	-0.124932	0.900577	0.999774
YGL141W	31.5704	-0.50336	0.641288	-0.784921	0.4325	0.999774
YGL140C	19.2435	-0.0687958	0.793396	-0.0867106	0.930902	0.999774
YGL139W	27.004	-0.0993393	0.664573	-0.149479	0.881176	0.999774
YGL137W	10.8483	-0.525843	1.0562	-0.497861	0.618582	0.999774
YGL136C	14.6136	0.645433	0.928045	0.695475	0.486757	0.999774
YGL134W	20.2628	0.825257	0.758138	1.08853	0.27636	0.999774
YGL133W	30.9472	0.451988	0.643033	0.7029	0.482118	0.999774
YGL131C	25.8635	-0.226514	0.673829	-0.336159	0.736751	0.999774
YBR246W	16.8127	-0.0824424	0.827653	-0.0996099	0.920654	0.999774
YBR241C	42.4621	-0.088459	0.54558	-0.162137	0.871198	0.999774
YBR240C	16.7794	0.702179	0.828553	0.847477	0.39673	0.999774
YBR242W	13.8106	-0.469952	0.925924	-0.507549	0.61177	0.999774
YGR245C	16.1123	-0.98581	0.878586	-1.12204	0.261845	0.999774
YGR244C	63.3906	0.540341	0.461794	1.17009	0.241964	0.999774
YOR377W	24.8655	0.025262	0.684222	0.0369208	0.970548	0.999774
YJL192C	12.7343	-0.548785	0.974309	-0.563256	0.573261	0.999774
YGR239C	32.0234	0.447304	0.621233	0.720026	0.471509	0.999774
YGR238C	33.7908	-0.0138999	0.599736	-0.0231767	0.981509	0.999774
YGR237C	24.3332	-0.0337598	0.688874	-0.0490072	0.960914	0.999774
YGR236C	8.25429	-0.133369	1.21533	-0.109739	0.912616	0.999774
YGR241C	29.3032	0.651527	0.640389	1.01739	0.308967	0.999774
YGR240C-A	20.8129	-0.146064	0.744004	-0.196322	0.844358	0.999774
YOR315W	13.0281	0.0889097	0.946385	0.0939467	0.925152	0.999774
YPL168W	10.1683	0.539646	1.10352	0.489021	0.624827	0.999774
YJR117W	32.1181	-0.158385	0.615684	-0.25725	0.796986	0.999774
YJR119C	40.0335	0.0696354	0.559256	0.124514	0.900908	0.999774
YJR120W	8.53259	-0.210913	1.20363	-0.175231	0.860898	0.999774
YJR112W-A	10.3071	0.407385	1.07613	0.378566	0.70501	0.999774
YJR113C	10.9706	1.67001	1.09379	1.52681	0.126809	0.999774
YJR115W	44.0939	0.642981	0.547755	1.17385	0.240455	0.999774
YJR116W	19.9676	0.288779	0.762049	0.37895	0.704725	0.999774
YPL081W	10.801	0.408836	1.04397	0.391617	0.695341	0.999774
YPL082C	21.4914	-0.992241	0.750302	-1.32246	0.186016	0.999774
YPL085W	13.5448	-0.442128	0.949872	-0.46546	0.641602	0.999774
YPL083C	8.40564	-0.351817	1.20892	-0.291017	0.771038	0.999774
YPL084W	8.50965	0.593858	1.19058	0.498797	0.617922	0.999774
YNL241C	50.6128	0.493829	0.505318	0.977265	0.328438	0.999774
YNL242W	53.8552	-0.156762	0.525678	-0.298209	0.765543	0.999774
YDR036C	8.81233	0.204407	1.17286	0.174281	0.861645	0.999774
YJL044C	20.243	-0.169515	0.758788	-0.223403	0.823222	0.999774
YNL243W	20.4858	0.160889	0.748447	0.214964	0.829795	0.999774
YNL195C	24.2705	0.0329907	0.693196	0.0475922	0.962041	0.999774
YCL036W	26.1816	-0.0339499	0.673893	-0.0503788	0.959821	0.999774
YNL293W	30.227	-0.694436	0.642326	-1.08113	0.27964	0.999774
YCL026C-A	9.93879	0.0869602	1.09338	0.0795335	0.936608	0.999774
YGR100W	26.7988	-0.410498	0.663598	-0.618595	0.536184	0.999774
YGR099W	13.254	-0.377874	0.957092	-0.394815	0.692979	0.999774
YGR097W	39.3521	0.23909	0.573276	0.417058	0.676636	0.999774
YGR096W	48.8871	0.286876	0.513356	0.558825	0.576281	0.999774
YGR094W	15.6479	-0.103703	0.862462	-0.120241	0.904292	0.999774
YGL190C	13.9236	-0.720798	0.93161	-0.773713	0.439101	0.999774
YIL039W	19.9418	0.217138	0.755278	0.287495	0.773733	0.999774
YGL192W	21.5481	-0.0147471	0.733363	-0.0201089	0.983957	0.999774
YGL193C	11.7363	-0.0106456	1.00687	-0.010573	0.991564	0.999774
YGL195W	62.3612	-0.219952	0.466114	-0.471885	0.637009	0.999774
YIL046W	11.709	-0.537176	1.02759	-0.522753	0.601146	0.999774
YIL046W-A	36.1463	0.0403294	0.582308	0.0692579	0.944784	0.999774
YIL044C	11.8707	-1.55735	1.05331	-1.47854	0.139264	0.999774
YIL045W	20.9259	-0.295703	0.74961	-0.394476	0.693229	0.999774
YIL042C	16.637	0.188639	0.829798	0.227331	0.820166	0.999774
YIL043C	23.3043	-0.512051	0.711947	-0.719227	0.472001	0.999774
YDR534C	8.74813	-0.0956371	1.18497	-0.0807087	0.935674	0.999774
YDR536W	20.8298	0.445138	0.746069	0.596644	0.550745	0.999774
YDR533C	17.3309	-0.234027	0.816378	-0.286666	0.774368	0.999774
YDR541C	18.7511	0.142411	0.781678	0.182186	0.855436	0.999774
YDR539W	19.2952	0.08386	0.768771	0.109083	0.913136	0.999774
YPR055W	11.9747	-0.568944	1.00209	-0.56776	0.570198	0.999774
YPR054W	23.0465	0.537111	0.703884	0.763068	0.445423	0.999774
YCL027W	20.6935	-1.11218	0.769596	-1.44515	0.148416	0.999774
YOR260W	11.3436	-0.0698191	1.02093	-0.0683878	0.945477	0.999774
YPR061C	13.2784	-0.624339	0.966707	-0.645842	0.518382	0.999774
YDL215C	61.2746	-0.113604	0.47063	-0.241388	0.809255	0.999774
YCR067C	27.7496	-0.254717	0.651644	-0.390883	0.695884	0.999774
YNL236W	19.7965	-0.758754	0.77595	-0.977839	0.328154	0.999774
YCR066W	10.9871	-0.687245	1.07222	-0.640957	0.52155	0.999774
YNL237W	16.1675	0.00825007	0.851621	0.00968749	0.992271	0.999774
YCR069W	15.9993	-0.746653	0.866151	-0.862035	0.388668	0.999774
YCL034W	28.9338	-0.984085	0.661131	-1.48849	0.136623	0.999774
YNL234W	21.4122	0.437999	0.733554	0.597092	0.550446	0.999774
YMR053C	25.7638	-0.0389988	0.677579	-0.0575562	0.954102	0.999774
YNL231C	38.4132	0.0910748	0.56823	0.160278	0.872662	0.999774
YNL230C	37.6514	-0.0776592	0.579866	-0.133926	0.893461	0.999774
YNL227C	18.1429	0.0612992	0.806483	0.0760081	0.939413	0.999774
YDR208W	16.51	0.127822	0.836076	0.152883	0.87849	0.999774
YDR206W	13.5477	0.209783	0.926495	0.226426	0.82087	0.999774
YDR207C	11.808	-1.3426	1.04539	-1.2843	0.199037	0.999774
YDR205W	24.4713	-0.178707	0.712974	-0.250651	0.802084	0.999774
YMR036C	11.4565	-0.342119	1.02254	-0.334577	0.737944	0.999774
YMR037C	15.385	0.462581	0.872612	0.53011	0.596035	0.999774
YMR038C	23.0769	-0.434468	0.715179	-0.607496	0.543522	0.999774
YMR039C	8.75852	-1.02185	1.2109	-0.843877	0.398738	0.999774
YMR040W	13.1808	0.275072	0.94161	0.292129	0.770188	0.999774
YDR421W	30.0764	-0.531628	0.644392	-0.825007	0.409367	0.999774
YDR422C	28.7911	0.108871	0.65221	0.166926	0.867429	0.999774
YDR419W	23.361	0.292536	0.708982	0.412615	0.679889	0.999774
YDR420W	29.8659	-0.0233768	0.669321	-0.0349262	0.972139	0.999774
YDR416W	8.07713	-0.100192	1.24914	-0.0802088	0.936071	0.999774
YAL058W	27.2313	-0.160253	0.656951	-0.243935	0.807281	0.999774
YDR415C	14.5752	0.574886	0.900535	0.638382	0.523225	0.999774
YDR411C	20.3944	-0.258316	0.759117	-0.340285	0.733642	0.999774
YAL061W	71.7922	-0.241082	0.43718	-0.551447	0.581327	0.999774
YMR163C	9.13188	1.10183	1.15488	0.954058	0.340054	0.999774
YNL246W	10.3225	1.13324	1.07886	1.0504	0.293532	0.999774
YMR047C	16.8127	-0.0824424	0.827653	-0.0996099	0.920654	0.999774
YPL056C	24.9741	-0.66101	0.712076	-0.928285	0.35326	0.999774
YHR142W	14.7649	0.532567	0.928527	0.573561	0.566265	0.999774
YNL253W	16.7101	-0.329371	0.838723	-0.392705	0.694537	0.999774
YMR046C	12.6687	-1.28804	1.00176	-1.28579	0.198518	0.999774
YNL249C	10.2673	-0.114071	1.08252	-0.105376	0.916077	0.999774
YHR139C	9.11501	-0.183729	1.16441	-0.157787	0.874624	0.999774
YNL251C	14.5583	-0.261621	0.914392	-0.286114	0.77479	0.999774
YNL250W	24.2751	-1.1285	0.71325	-1.58219	0.113607	0.999774
YER031C	10.7701	-1.38703	1.09995	-1.26099	0.207312	0.999774
YER028C	22.0434	0.189059	0.726282	0.260311	0.794624	0.999774
YER027C	15.4384	-1.99423	0.947822	-2.10401	0.0353777	0.999774
YER024W	46.8823	0.0229008	0.538506	0.0425266	0.966079	0.999774
YNL067W	11.4874	1.03612	1.0157	1.02011	0.307676	0.999774
YHR144C	8.73414	-0.605405	1.1917	-0.508019	0.61144	0.999774
YCL032W	26.4269	-1.10881	0.691127	-1.60435	0.108638	0.999774
YAL040C	14.3546	-0.540117	0.911472	-0.592577	0.553464	0.999774
YER032W	20.8757	-0.226518	0.742192	-0.305202	0.760213	0.999774
YER033C	23.0016	-0.347631	0.717082	-0.484785	0.627829	0.999774
YAL039C	40.6328	0.368166	0.554222	0.664293	0.506503	0.999774
YNL041C	15.2397	-0.77342	0.886609	-0.872335	0.383026	0.999774
YOR304W	18.5399	0.748275	0.812374	0.921098	0.356999	0.999774
YHR132C	29.017	-0.0948944	0.639268	-0.148442	0.881994	0.999774
YPL116W	15.7171	0.952705	0.86494	1.10147	0.270692	0.999774
YLL055W	10.8533	0.833877	1.12939	0.738341	0.460307	0.999774
YMR055C	18.8885	-0.165055	0.780267	-0.211536	0.832469	0.999774
YMR054W	37.1817	0.781682	0.584428	1.33752	0.181054	0.999774
YLL057C	23.2591	0.224567	0.71736	0.313047	0.754245	0.999774
YBR132C	29.3365	0.212594	0.633927	0.33536	0.737353	0.999774
YBR131W	11.8876	-0.161414	0.99935	-0.161519	0.871685	0.999774
YBR136W	30.4551	-0.658641	0.632768	-1.04089	0.297927	0.999774
YBR133C	31.8434	0.201836	0.612402	0.329581	0.741716	0.999774
YBR139W	27.2084	0.103885	0.658814	0.157685	0.874705	0.999774
YBR138C	20.1161	-0.226574	0.758204	-0.298829	0.76507	0.999774
YPL265W	36.6415	0.161169	0.578156	0.278764	0.780426	0.999774
YDR093W	92.3243	0.123119	0.38965	0.315973	0.752023	0.999774
YER128W	12.611	0.255149	0.980138	0.26032	0.794617	0.999774
YER125W	11.2012	-1.06497	1.05977	-1.00491	0.314942	0.999774
YER132C	60.7173	-0.132186	0.480391	-0.275163	0.783191	0.999774
YER129W	42.8867	-0.534513	0.549263	-0.973146	0.330481	0.999774
YER130C	32.4319	-0.423054	0.619968	-0.68238	0.494999	0.999774
YLR351C	13.3985	0.794673	1.8199	0.436658	0.662359	0.999774
YOL021C	17.2911	-0.591063	0.824407	-0.716955	0.473402	0.999774
YNL039W	7.88741	-0.0338856	1.2456	-0.0272043	0.978297	0.999774
YMR307W	8.98054	1.29578	1.16735	1.11002	0.266988	0.999774
YHR140W	17.091	-0.121903	0.821608	-0.148371	0.88205	0.999774
YLR352W	32.6976	-0.434904	0.611316	-0.711422	0.476823	0.999774
YPL109C	30.4669	-0.766397	0.643507	-1.19097	0.233665	0.999774
YPL262W	18.2408	1.45653	0.802183	1.81571	0.0694144	0.999774
YPR074C	13.0051	0.604278	0.948396	0.637157	0.524022	0.999774
YDR096W	9.74908	0.14436	1.12185	0.12868	0.897611	0.999774
YMR215W	10.2555	0.133587	1.11257	0.12007	0.904427	0.999774
YMR206W	21.4122	0.437999	0.733554	0.597092	0.550446	0.999774
YKR017C	10.4251	1.44887	1.08319	1.3376	0.181027	0.999774
YMR208W	11.7208	-0.812267	1.03019	-0.788467	0.430424	0.999774
YMR209C	14.6484	0.0301396	0.889699	0.0338762	0.972976	0.999774
YMR210W	22.4974	-0.045784	0.715471	-0.0639914	0.948977	0.999774
YMR212C	8.66099	0.398054	1.18039	0.337221	0.73595	0.999774
YKR018C	20.6512	0.263575	0.743528	0.354492	0.72297	0.999774
YMR306W	51.4437	-0.541467	0.507849	-1.0662	0.286334	0.999774
YNL263C	8.43146	-0.165517	1.21272	-0.136484	0.891439	0.999774
YLR108C	15.3746	0.860027	0.86827	0.990506	0.321927	0.999774
YLR357W	16.8923	0.541926	0.822577	0.658815	0.510015	0.999774
YPL110C	44.2492	0.0479486	0.535831	0.0894845	0.928697	0.999774
YPL263C	24.3089	0.081695	0.687592	0.118813	0.905423	0.999774
YDL072C	8.78938	0.94582	1.17258	0.806615	0.419889	0.999774
YJL051W	28.9593	0.461401	0.647014	0.713123	0.47577	0.999774
YBR003W	13.0783	-0.0129821	0.958639	-0.0135422	0.989195	0.999774
YBR002C	8.71119	0.254472	1.19447	0.213041	0.831295	0.999774
YBR001C	99.3839	-0.441341	0.380804	-1.15897	0.246469	0.999774
YBL001C	33.0792	-0.259186	0.62632	-0.413824	0.679003	0.999774
YBL002W	16.6768	0.49752	0.82807	0.600819	0.547961	0.999774
YBL003C	13.9494	-0.593915	0.945766	-0.627972	0.530022	0.999774
YBL004W	14.7688	-1.5485	0.93728	-1.65212	0.0985091	0.999774
YMR243C	20.4844	-0.0471276	0.747059	-0.0630842	0.949699	0.999774
YKR019C	18.8595	1.17219	0.82108	1.42762	0.153402	0.999774
YBR006W	46.9651	-0.361973	0.525658	-0.688609	0.491069	0.999774
YBR005W	11.4307	-0.484942	1.02813	-0.471674	0.63716	0.999774
YHR146W	9.26779	0.0953166	1.13743	0.0837997	0.933216	0.999774
YOL082W	11.4859	0.698591	1.02508	0.6815	0.495555	0.999774
YOL081W	28.8939	-1.26604	0.670309	-1.88874	0.0589263	0.999774
YOL084W	52.5085	0.29885	0.504167	0.592761	0.553341	0.999774
YOL083W	10.2583	0.905018	1.07675	0.840508	0.400624	0.999774
YOL086W-A	10.7138	0.790123	1.05249	0.750716	0.452824	0.999774
YLR268W	7.79883	-0.0164965	1.25576	-0.0131366	0.989519	0.999774
YJL050W	17.0756	-0.665056	0.831758	-0.799578	0.423955	0.999774
YLR267W	14.3995	0.864364	0.911348	0.948446	0.342903	0.999774
YPR141C	14.483	-0.128748	0.90462	-0.142322	0.886825	0.999774
YPL186C	25.2582	0.050984	0.67577	0.0754458	0.93986	0.999774
YAL020C	19.0782	-0.192807	0.778827	-0.247561	0.804474	0.999774
YGR223C	9.50772	-0.105657	1.12276	-0.0941054	0.925025	0.999774
YDL065C	12.9868	-0.731413	0.971075	-0.7532	0.45133	0.999774
YPL224C	27.5982	-0.18903	0.652822	-0.289558	0.772154	0.999774
YCR030C	33.4536	-0.826652	0.624349	-1.32402	0.185496	0.999774
YOL125W	29.0052	-0.00549055	0.662639	-0.00828588	0.993389	0.999774
YOR229W	47.2298	0.373228	0.522562	0.714228	0.475086	0.999774
YOR011W	38.8252	-0.374389	0.57567	-0.650352	0.515465	0.999774
YPL222W	30.5641	0.160354	0.630032	0.254517	0.799096	0.999774
YPR140W	13.3921	-0.666403	0.977642	-0.681643	0.495465	0.999774
YKL205W	23.5403	0.534681	0.700676	0.763093	0.445408	0.999774
YKL206C	12.1982	1.38166	0.991181	1.39395	0.163331	0.999774
YKL207W	14.7782	0.648387	0.892346	0.72661	0.467465	0.999774
YBL088C	77.7641	-0.382092	0.423362	-0.902518	0.366782	0.999774
YKL209C	66.4504	0.349478	0.449826	0.776917	0.437207	0.999774
YKL210W	27.6399	1.46324	0.671914	2.17772	0.0294267	0.999774
YKL211C	11.454	2.16369	1.08166	2.00034	0.0454633	0.999774
YKL212W	18.5449	1.47585	0.796032	1.85401	0.0637376	0.999774
YBL095W	11.0868	-1.24517	1.08035	-1.15256	0.249092	0.999774
YBL097W	19.3773	-1.0939	0.799716	-1.36787	0.171354	0.999774
YBL089W	12.5941	-0.818718	1.00979	-0.810777	0.417494	0.999774
YBL091C	16.7101	-0.329371	0.838723	-0.392705	0.694537	0.999774
YBL091C-A	11.3052	-0.180771	1.02941	-0.175606	0.860603	0.999774
YNL005C	13.0937	0.592586	0.951971	0.622484	0.533624	0.999774
YNL004W	70.1676	-0.435409	0.445826	-0.976633	0.328751	0.999774
YPL226W	11.1051	0.46589	1.03093	0.451912	0.651333	0.999774
YDL017W	12.1017	-0.459041	0.99454	-0.461562	0.644396	0.999774
YNL010W	13.6349	-0.11406	0.925675	-0.123218	0.901935	0.999774
YNL014W	24.1288	-0.269119	0.710763	-0.378634	0.704959	0.999774
YNL012W	45.305	-0.495179	0.535519	-0.924672	0.355137	0.999774
YNL009W	30.7925	-1.23414	0.646841	-1.90796	0.0563968	0.999774
YNL008C	25.544	-0.630387	0.684824	-0.920509	0.357307	0.999774
YNL042W	17.7222	-0.453573	0.810777	-0.55943	0.575868	0.999774
YPL177C	7.79883	-0.0164965	1.25576	-0.0131366	0.989519	0.999774
YOR226C	11.9902	0.164549	0.988973	0.166384	0.867855	0.999774
YPL184C	14.2894	1.60286	0.916675	1.74856	0.0803678	0.999774
YPL221W	49.0961	-0.0838459	0.513393	-0.163317	0.870269	0.999774
YDL070W	15.9312	0.750301	0.876235	0.856277	0.391844	0.999774
YKL101W	52.845	0.674188	0.500193	1.34786	0.177705	0.999774
YKL103C	32.2594	1.12228	0.611907	1.83407	0.0666443	0.999774
YKL107W	10.6267	1.17337	1.07312	1.09342	0.27421	0.999774
YKL108W	11.9827	1.33584	0.999453	1.33657	0.181364	0.999774
YKL109W	42.0225	0.985321	0.548334	1.79694	0.0723459	0.999774
YKL110C	14.2406	1.97923	0.938917	2.10799	0.0350317	0.999774
YKL105C	50.2857	0.61157	0.507036	1.20617	0.227753	0.999774
YKL106W	10.6163	1.74448	1.09109	1.59884	0.109856	0.999774
YML054C-A	18.8124	-0.171684	0.803628	-0.213637	0.83083	0.999774
YBR239C	34.0898	-0.463843	0.603747	-0.768273	0.442325	0.999774
YIL108W	34.5762	0.0245454	0.594067	0.0413176	0.967043	0.999774
YPL108W	17.6351	-0.182526	0.80858	-0.225736	0.821406	0.999774
YPR073C	10.8253	0.162163	1.04415	0.155306	0.87658	0.999774
YKR068C	12.4919	1.90496	1.01337	1.87982	0.060133	0.999774
YKR067W	57.0377	0.728995	0.481288	1.51467	0.129855	0.999774
YKR066C	24.15	0.74641	0.692158	1.07838	0.280863	0.999774
YKR072C	35.5937	1.35625	0.599118	2.26374	0.0235903	0.999774
YKR071C	9.76307	0.529377	1.10281	0.480026	0.631209	0.999774
YKR070W	14.6025	0.937421	0.900978	1.04045	0.298131	0.999774
YKR069W	31.6691	0.46615	0.612705	0.760808	0.446772	0.999774
YLR392C	17.204	-0.302854	0.820992	-0.368888	0.712211	0.999774
YKR075C	24.7479	1.03206	0.684509	1.50773	0.131623	0.999774
YBR230W-A	19.888	-0.266036	0.768327	-0.346254	0.729152	0.999774
YLL029W	75.1114	0.355191	0.42672	0.832374	0.405198	0.999774
YBR231C	9.15483	0.40084	1.16123	0.345185	0.729956	0.999774
YDL102W	12.7573	-1.29706	0.998446	-1.29908	0.193916	0.999774
YBR233W	9.20503	0.265959	1.14118	0.233056	0.815718	0.999774
YHR166C	18.74	0.37804	0.810482	0.466439	0.640902	0.999774
YHR159W	20.5177	-0.817393	0.763041	-1.07123	0.284066	0.999774
YHR161C	32.2784	-0.602493	0.622009	-0.968625	0.332733	0.999774
YJL053W	8.44689	0.774803	1.20297	0.644078	0.519525	0.999774
YJL054W	10.4918	-1.33667	1.1229	-1.19037	0.233901	0.999774
YJL056C	16.3329	0.144516	0.838384	0.172375	0.863143	0.999774
YHR168W	10.792	1.32968	1.06407	1.24962	0.211439	0.999774
YJL059W	12.9255	-0.216471	0.956755	-0.226255	0.821003	0.999774
YJL060W	13.5448	-0.442128	0.949872	-0.46546	0.641602	0.999774
YML100W-A	17.0498	-0.770307	0.842296	-0.914532	0.360437	0.999774
YIL107C	26.1138	-0.600525	0.675947	-0.888421	0.374315	0.999774
YLR219W	18.8537	0.336569	0.786772	0.427785	0.668808	0.999774
YLR218C	11.5103	0.47718	1.016	0.469667	0.638593	0.999774
YLR216C	9.0433	1.12095	1.17692	0.952451	0.340868	0.999774
YLR214W	22.0803	0.0508577	0.720104	0.0706254	0.943696	0.999774
YLR213C	27.8367	-0.428133	0.653041	-0.6556	0.512082	0.999774
YLR210W	10.4954	-0.046185	1.08713	-0.0424835	0.966113	0.999774
YLR209C	11.0165	0.479213	1.03309	0.463863	0.642746	0.999774
YCL039W	41.6939	-0.799111	0.575967	-1.38742	0.165312	0.999774
YOR239W	19.798	-0.499531	0.766871	-0.651388	0.514796	0.999774
YCL040W	121.295	-0.13563	0.345238	-0.392859	0.694424	0.999774
YNL037C	10.8895	0.395426	1.04169	0.379599	0.704243	0.999774
YMR313C	10.9035	0.725675	1.04925	0.691615	0.489179	0.999774
YGL124C	15.7017	0.480055	0.857315	0.559952	0.575512	0.999774
YGL125W	55.7276	0.448813	0.486648	0.922254	0.356396	0.999774
YGL126W	132.962	0.0230558	0.331942	0.0694573	0.944626	0.999774
YIL121W	34.7859	-0.468322	0.60687	-0.7717	0.440292	0.999774
YGR193C	13.0604	1.55167	0.960388	1.61567	0.106166	0.999774
YIL126W	31.9678	-1.5163	0.651726	-2.32659	0.0199871	0.999774
YIL125W	52.7979	0.198669	0.511798	0.388179	0.697884	0.999774
YIL128W	11.0011	-0.262176	1.04113	-0.251818	0.801182	0.999774
YDL113C	14.5583	-0.261621	0.914392	-0.286114	0.77479	0.999774
YML062C	14.8241	-0.288287	0.888146	-0.324594	0.745489	0.999774
YPL277C	14.0918	0.127547	0.915435	0.139329	0.88919	0.999774
YHL025W	38.3823	-0.357415	0.571171	-0.625758	0.531474	0.999774
YHL024W	53.8007	-0.385215	0.498849	-0.772208	0.439991	0.999774
YHL027W	31.5453	-0.467956	0.629972	-0.742821	0.45759	0.999774
YHL026C	24.1561	-0.0227711	0.690542	-0.0329756	0.973694	0.999774
YHL029C	19.4798	-0.811673	0.78288	-1.03678	0.299839	0.999774
YHL028W	33.8345	-0.693413	0.609552	-1.13758	0.255297	0.999774
YHL030W	63.0545	-0.3812	0.46823	-0.814131	0.41557	0.999774
YHL032C	41.7409	-0.0563693	0.552402	-0.102044	0.918722	0.999774
YJR126C	27.8034	0.0952389	0.650235	0.146468	0.883552	0.999774
YIL104C	11.1782	-0.285854	1.04661	-0.273122	0.784759	0.999774
YJR124C	13.849	-0.369214	0.929036	-0.397417	0.69106	0.999774
YJR131W	19.6118	0.107737	0.773088	0.139359	0.889166	0.999774
YJR130C	19.8865	-0.505779	0.766082	-0.660215	0.509116	0.999774
YJR129C	44.5978	-0.365108	0.542581	-0.67291	0.501004	0.999774
YJR132W	13.0295	0.404977	0.949957	0.426311	0.669881	0.999774
YIL105C	42.928	-0.278858	0.549232	-0.507724	0.611647	0.999774
YPL183C	25.0139	-0.405324	0.709376	-0.571381	0.567741	0.999774
YGR184C	48.9832	-0.0227599	0.513784	-0.0442985	0.964667	0.999774
YOR137C	17.4977	0.14731	0.810722	0.181702	0.855817	0.999774
YOR138C	50.1171	-0.36646	0.51135	-0.716651	0.473589	0.999774
YOR140W	16.6051	1.18931	0.837108	1.42074	0.155392	0.999774
YOR141C	17.6519	0.513157	0.808607	0.634619	0.525677	0.999774
YGL207W	18.1562	0.15738	0.807686	0.194853	0.845508	0.999774
YNL021W	11.1449	0.910575	1.03209	0.882265	0.377633	0.999774
YIL109C	19.0717	-1.53734	0.819334	-1.87633	0.06061	0.999774
YNL284C-A	21.1773	1.15871	0.744394	1.55658	0.119571	0.999774
YDL106C	11.6233	0.237422	1.00455	0.236347	0.813164	0.999774
YGR127W	18.5406	0.843282	0.82614	1.02075	0.307373	0.999774
YGR124W	35.8163	-0.0222945	0.593144	-0.037587	0.970017	0.999774
YGR125W	21.4735	0.17497	0.729397	0.239883	0.810421	0.999774
YGR130C	28.0677	-0.0726387	0.646828	-0.1123	0.910586	0.999774
YGR131W	8.66994	-1.00813	1.21198	-0.831805	0.405519	0.999774
YGR129W	8.7008	0.964643	1.18367	0.814961	0.415094	0.999774
YDL073W	11.7273	0.874398	1.00246	0.872256	0.383069	0.999774
YPL250C	19.6915	0.626249	0.775112	0.807946	0.419121	0.999774
YDR106W	8.20553	0.524748	1.2231	0.429029	0.667902	0.999774
YCR028C	15.035	1.28534	0.924722	1.38998	0.164536	0.999774
YGL201C	27.647	-0.410232	0.657105	-0.624302	0.532429	0.999774
YGR138C	9.93736	-0.35838	1.11125	-0.322503	0.747072	0.999774
YGR134W	29.9588	0.384567	0.629276	0.611127	0.541115	0.999774
YGR142W	8.1901	-0.489235	1.23066	-0.397539	0.69097	0.999774
YGL206C	29.3161	-0.637782	0.646361	-0.986726	0.323777	0.999774
YGR140W	10.2429	0.160727	1.07734	0.149188	0.881405	0.999774
YGR141W	31.574	-0.125032	0.61668	-0.20275	0.83933	0.999774
YJL082W	23.0952	0.310966	0.702895	0.442408	0.658194	0.999774
YGR144W	15.7659	0.633368	0.854488	0.741226	0.458557	0.999774
YGL196W	15.9904	0.0250972	0.848638	0.0295736	0.976407	0.999774
YGL197W	19.4648	0.810251	0.777133	1.04262	0.297126	0.999774
YIL054W	36.421	-0.288007	0.58568	-0.491747	0.622898	0.999774
YIL053W	15.0515	-0.40579	0.90957	-0.446134	0.6555	0.999774
YDR524C	11.9916	0.503497	0.993078	0.507006	0.612151	0.999774
YDR523C	15.7379	0.161361	0.883171	0.182706	0.855028	0.999774
YDR527W	19.127	-0.516703	0.781049	-0.66155	0.50826	0.999774
YDR525W-A	26.7913	0.183229	0.657742	0.278573	0.780573	0.999774
YDR528W	12.143	0.363002	0.983424	0.36912	0.712038	0.999774
YDR530C	27.0054	0.0600555	0.65768	0.0913141	0.927243	0.999774
YLR070C	22.033	0.479188	0.71864	0.666799	0.504901	0.999774
YPR066W	17.0652	-0.211259	0.835424	-0.252877	0.800364	0.999774
YPR068C	25.0182	0.125285	0.678616	0.184619	0.853528	0.999774
YBR128C	14.4999	0.70522	0.920255	0.766331	0.443479	0.999774
YNL023C	23.0221	0.647958	0.705678	0.918206	0.358511	0.999774
YJL062W	28.6731	-0.327162	0.647041	-0.505628	0.613118	0.999774
YOR259C	9.61924	-0.987078	1.14339	-0.863292	0.387977	0.999774
YJL069C	9.74764	-0.3075	1.11195	-0.27654	0.782133	0.999774
YJL068C	13.1152	-0.256206	0.949934	-0.26971	0.787384	0.999774
YJL071W	12.3814	-0.13342	0.975193	-0.136814	0.891178	0.999774
YJL070C	20.9797	0.168123	0.73671	0.228208	0.819484	0.999774
YJL066C	16.5972	-0.141352	0.834049	-0.169477	0.865421	0.999774
YJL065C	12.7372	0.164411	1.02652	0.160163	0.872753	0.999774
YNL238W	15.5747	0.421885	0.858539	0.491398	0.623145	0.999774
YNL239W	17.979	0.172966	0.799457	0.216354	0.828712	0.999774
YNL240C	14.9679	0.603305	0.877483	0.68754	0.491743	0.999774
YDR200C	14.8653	0.369021	0.88274	0.41804	0.675918	0.999774
YDR198C	10.5212	0.0926565	1.06106	0.0873241	0.930414	0.999774
YJR108W	16.1661	-0.266916	0.847642	-0.314892	0.752844	0.999774
YDR191W	14.8395	0.27383	0.883763	0.309845	0.756679	0.999774
YDR192C	9.22942	-0.0338716	1.14589	-0.0295592	0.976419	0.999774
YAL048C	22.2729	0.396424	0.714917	0.554504	0.579234	0.999774
YAL047C	9.42953	-0.940353	1.16307	-0.808512	0.418796	0.999774
YDR435C	17.2334	0.406232	0.822984	0.493608	0.621583	0.999774
YAL044C	13.2178	0.0467451	0.953819	0.0490083	0.960913	0.999774
YAL043C	24.8952	-1.16177	0.718096	-1.61785	0.105694	0.999774
YNL066W	26.9581	0.411502	0.655868	0.627415	0.530387	0.999774
YDR428C	13.4208	0.135248	0.936061	0.144487	0.885116	0.999774
YDR430C	30.5139	0.202764	0.648203	0.312809	0.754426	0.999774
YDR423C	18.5356	0.0951416	0.786646	0.120946	0.903734	0.999774
YDR425W	13.4437	-0.415202	0.938274	-0.442517	0.658115	0.999774
YNL257C	39.6766	-1.30315	0.582868	-2.23575	0.0253682	0.999774
YOR025W	14.5279	1.18603	0.904425	1.31137	0.189734	0.999774
YNL264C	15.4065	-0.268828	0.87061	-0.308781	0.757488	0.999774
YNL265C	11.8507	0.101292	1.05635	0.0958893	0.923609	0.999774
YNL262W	30.6219	-0.404529	0.627936	-0.64422	0.519433	0.999774
YFL024C	29.5058	-0.653844	0.641171	-1.01977	0.30784	0.999774
YLR429W	28.1075	0.122011	0.645222	0.189099	0.850015	0.999774
YNL281W	8.01293	-0.457322	1.26903	-0.360372	0.718569	0.999774
YPL004C	28.7372	-0.226455	0.64413	-0.351567	0.725163	0.999774
YER035W	15.5776	0.92856	0.888235	1.0454	0.295839	0.999774
YER034W	22.7205	-0.760576	0.723123	-1.05179	0.292894	0.999774
YER037W	14.5842	-0.156177	0.895199	-0.17446	0.861504	0.999774
YER036C	13.164	-0.75004	0.958072	-0.782864	0.433707	0.999774
YOR283W	9.26779	0.0953166	1.13743	0.0837997	0.933216	0.999774
YER041W	14.506	-0.677889	0.908604	-0.746078	0.45562	0.999774
YER040W	9.12828	0.00794896	1.23249	0.00644953	0.994854	0.999774
YPL258C	16.5484	0.196962	0.832282	0.236653	0.812926	0.999774
YPR065W	9.94023	0.498914	1.10292	0.452356	0.651012	0.999774
YDR043C	13.5298	1.69577	0.958619	1.76897	0.0768985	0.999774
YOR276W	8.89052	0.883778	1.22391	0.722095	0.470236	0.999774
YNL024C	31.2789	-0.544691	0.624729	-0.871883	0.383272	0.999774
YOR286W	10.6033	-2.93797	1.28857	-2.28002	0.0226066	0.999774
YNL282W	9.09063	0.126047	1.17313	0.107446	0.914436	0.999774
YML075C	35.2034	0.580438	0.589636	0.984401	0.324919	0.999774
YML054C	40.3803	0.421267	0.557953	0.755023	0.450235	0.999774
YOL053W	19.8503	-0.206733	0.779968	-0.265053	0.790969	0.999774
YPR032W	10.2687	0.299933	1.1088	0.270503	0.786774	0.999774
YML059C	40.4402	0.181487	0.557425	0.325582	0.744741	0.999774
YML060W	7.92579	0.116527	1.25391	0.0929315	0.925958	0.999774
YML061C	9.49732	0.577492	1.16198	0.496991	0.619196	0.999774
YML056C	24.6564	0.724118	0.698649	1.03646	0.29999	0.999774
YML057W	21.1023	-0.406955	0.772839	-0.526572	0.598491	0.999774
YML058W	9.04474	1.5593	1.17007	1.33265	0.182646	0.999774
YBR123C	7.91036	-1.09065	1.28366	-0.849639	0.395526	0.999774
YBR125C	11.7976	-0.547971	1.01515	-0.539795	0.589339	0.999774
YBR126C	11.4705	0.0244132	1.01817	0.0239776	0.98087	0.999774
YBR126W-A	16.4046	-0.693099	0.850872	-0.814575	0.415316	0.999774
YOR228C	17.545	-0.439341	0.819777	-0.535928	0.592009	0.999774
YHR082C	29.7981	-0.51153	0.641264	-0.797689	0.425051	0.999774
YJL168C	19.293	-0.269813	0.831774	-0.324382	0.745649	0.999774
YHR211W	17.8108	-0.460598	0.809355	-0.569092	0.569294	0.999774
YER124C	14.728	0.726911	0.887253	0.819282	0.412625	0.999774
YER123W	20.796	-0.845443	0.756825	-1.11709	0.263955	0.999774
YPL054W	15.1332	0.727093	0.895349	0.812077	0.416747	0.999774
YLR362W	22.9669	0.0880368	0.70576	0.12474	0.900729	0.999774
YNL073W	18.5206	1.61587	0.799553	2.02097	0.043283	0.999774
YER118C	7.87342	-0.597805	1.28879	-0.463849	0.642756	0.999774
YER119C	33.6911	0.124456	0.603273	0.206301	0.836556	0.999774
YER121W	10.2045	0.0454533	1.10256	0.0412254	0.967116	0.999774
YJL170C	12.0027	0.142516	1.04521	0.136351	0.891544	0.999774
YPL053C	18.6715	-0.471083	0.790646	-0.59582	0.551295	0.999774
YOL052C	32.372	-0.0886412	0.609598	-0.145409	0.884388	0.999774
YNL074C	17.6584	1.5004	0.816478	1.83765	0.066114	0.999774
YMR205C	13.3257	-1.74344	1.01117	-1.72417	0.0846765	0.999774
YMR201C	16.51	0.127822	0.836076	0.152883	0.87849	0.999774
YMR199W	17.3464	0.245425	0.812591	0.302028	0.762631	0.999774
YMR198W	22.4027	0.790388	0.724743	1.09058	0.275459	0.999774
YMR196W	50.455	0.165684	0.508262	0.325981	0.744439	0.999774
YBR015C	16.3189	-0.100821	0.845727	-0.119212	0.905107	0.999774
YMR042W	60.8489	-0.544745	0.473433	-1.15063	0.249885	0.999774
YNL277W-A	14.5214	-0.0431685	0.894096	-0.0482817	0.961492	0.999774
YBR007C	30.5465	-0.339595	0.635513	-0.534364	0.59309	0.999774
YBR008C	40.49	-0.932595	0.568297	-1.64104	0.10079	0.999774
YBR012W-B	8.36582	-1.18691	1.24663	-0.952089	0.341052	0.999774
YJR065C	12.2405	-0.600089	1.00946	-0.594466	0.5522	0.999774
YPL119C	13.736	-0.142503	0.944856	-0.150819	0.880118	0.999774
YPL256C	10.7597	-0.514174	1.06648	-0.482124	0.629718	0.999774
YOL092W	12.1645	-0.608323	1.00328	-0.606334	0.544293	0.999774
YOL089C	18.069	0.392672	0.82003	0.47885	0.632045	0.999774
YOL090W	19.0825	0.468972	0.791931	0.592188	0.553725	0.999774
YNL278W	62.1809	0.238776	0.463245	0.515442	0.606244	0.999774
YOL096C	13.0628	-0.724017	0.978122	-0.740211	0.459172	0.999774
YLR289W	12.5163	1.69092	0.994399	1.70045	0.0890467	0.999774
YOL087C	23.4916	0.750409	0.708695	1.05886	0.289663	0.999774
YNL126W	9.68344	-0.625052	1.12418	-0.556009	0.578205	0.999774
YNL072W	25.8022	0.00806713	0.670779	0.0120265	0.990404	0.999774
YPL255W	8.48022	-0.956697	1.24814	-0.766501	0.443378	0.999774
YCR073W-A	10.9871	-0.687245	1.07222	-0.640957	0.52155	0.999774
YPL097W	8.28659	2.24603	1.26611	1.77395	0.0760706	0.999774
YDR105C	12.1799	0.117998	0.99911	0.118103	0.905986	0.999774
YLR417W	8.31562	-0.950952	1.27445	-0.746167	0.455566	0.999774
YPL194W	10.6252	0.8049	1.05537	0.762668	0.445662	0.999774
YNL083W	15.4478	0.361993	0.863227	0.419349	0.674961	0.999774
YNL127W	22.4346	0.026566	0.721195	0.0368361	0.970616	0.999774
YPL064C	12.0891	-0.439672	1.01894	-0.431501	0.666104	0.999774
YBL098W	19.8546	0.428792	0.757805	0.565834	0.571506	0.999774
YOR195W	12.4352	0.595698	0.992437	0.600238	0.548348	0.999774
YBL101C	50.8419	-0.160545	0.508107	-0.315968	0.752027	0.999774
YBL100W-B	14.4371	0.811035	0.955187	0.849085	0.395834	0.999774
YBL105C	16.8202	-1.1939	0.856981	-1.39315	0.163574	0.999774
YBL104C	50.2136	0.119796	0.50749	0.236055	0.81339	0.999774
YBL103C	9.74764	-0.3075	1.11195	-0.27654	0.782133	0.999774
YNR008W	47.318	-0.474836	0.527262	-0.90057	0.367817	0.999774
YNR007C	8.83671	-0.110975	1.17058	-0.0948036	0.924471	0.999774
YNL003C	10.6754	0.695782	1.0787	0.645017	0.518916	0.999774
YNL128W	21.2454	0.148405	0.742418	0.199895	0.841563	0.999774
YNL077W	16.7335	1.47389	0.844103	1.74611	0.0807926	0.999774
YNR002C	70.5832	-0.537607	0.444887	-1.20841	0.226889	0.999774
YNR006W	8.45584	-0.535196	1.22638	-0.436402	0.662545	0.999774
YNR004W	10.8999	-0.227835	1.08385	-0.210208	0.833505	0.999774
YLR227C	15.9201	1.02	0.866295	1.17743	0.239024	0.999774
YOR017W	11.4092	0.519802	1.02435	0.507444	0.611843	0.999774
YOR162C	40.5273	0.0748951	0.559105	0.133955	0.893438	0.999774
YMR171C	16.7514	0.265893	0.847814	0.313622	0.753808	0.999774
YPR058W	8.31993	0.672802	1.22898	0.547446	0.584072	0.999774
YDL185W	12.9484	-0.856948	0.970343	-0.883139	0.377161	0.999774
YDL210W	19.1578	0.370712	0.774573	0.478602	0.632222	0.999774
YOR227W	35.9522	-0.313474	0.593322	-0.528338	0.597265	0.999774
YOR018W	28.0899	-0.433847	0.676855	-0.640975	0.521539	0.999774
YKL052C	19.6441	1.07745	0.77602	1.38843	0.165007	0.999774
YKL051W	34.5213	0.715405	0.599001	1.19433	0.232349	0.999774
YKL055C	9.57839	2.02704	1.17358	1.72723	0.084126	0.999774
YMR172W	29.0991	-0.868518	0.650128	-1.33592	0.181576	0.999774
YKL059C	20.8976	1.01958	0.74992	1.35959	0.17396	0.999774
YJR149W	16.978	0.0523174	0.829299	0.0630862	0.949698	0.999774
YIL137C	33.6638	-0.0459354	0.599615	-0.0766082	0.938935	0.999774
YAL051W	44.5285	-0.845584	0.544886	-1.55185	0.120697	0.999774
YLR384C	16.6585	-0.526248	0.847466	-0.620967	0.534622	0.999774
YLR225C	13.5477	0.209783	0.926495	0.226426	0.82087	0.999774
YJL171C	10.7611	-0.0844969	1.04964	-0.0805007	0.935839	0.999774
YJL172W	23.7738	-0.354469	0.699254	-0.506924	0.612208	0.999774
YPR029C	22.9514	-0.283542	0.709734	-0.399505	0.689521	0.999774
YLR398C	21.593	0.873517	0.730193	1.19628	0.231586	0.999774
YLR399C	8.1582	1.62209	1.24464	1.30326	0.192487	0.999774
YLR401C	34.2925	0.644716	0.599716	1.07504	0.282358	0.999774
YNL123W	30.478	-0.956972	0.640473	-1.49417	0.135132	0.999774
YLR396C	16.5545	-1.17308	0.872105	-1.34511	0.17859	0.999774
YIL101C	46.3723	-0.209616	0.527485	-0.397387	0.691082	0.999774
YLR403W	8.59679	0.105034	1.18998	0.0882653	0.929666	0.999774
YLR404W	9.50772	-0.105657	1.12276	-0.0941054	0.925025	0.999774
YPL103C	20.8846	-0.851152	0.756393	-1.12528	0.260471	0.999774
YJL105W	10.1927	0.284699	1.09104	0.260943	0.794137	0.999774
YHR158C	24.292	-0.464258	0.694343	-0.668629	0.503732	0.999774
YHR152W	7.79883	-0.0164965	1.25576	-0.0131366	0.989519	0.999774
YHR151C	24.845	-1.08032	0.704928	-1.53252	0.125393	0.999774
YHR150W	19.9418	0.217138	0.755278	0.287495	0.773733	0.999774
YHR149C	17.5952	-0.52773	0.815971	-0.646751	0.517793	0.999774
YHR156C	13.8841	1.63883	0.949492	1.72601	0.0843454	0.999774
YHR155W	18.2802	-0.262172	0.795882	-0.32941	0.741845	0.999774
YHR154W	25.2183	-0.17034	0.678251	-0.251145	0.801702	0.999774
YHR153C	8.64556	-0.591026	1.19564	-0.494316	0.621083	0.999774
YLL024C	25.3532	0.75958	0.675481	1.1245	0.2608	0.999774
YLL023C	16.637	0.188639	0.829798	0.227331	0.820166	0.999774
YLL022C	12.4611	0.705214	0.969388	0.727484	0.46693	0.999774
YJL106W	25.5454	-0.435948	0.678208	-0.642794	0.520358	0.999774
YJL094C	24.5362	0.0157343	0.707762	0.0222311	0.982264	0.999774
YLL015W	41.5483	-0.257296	0.557967	-0.461131	0.644704	0.999774
YJL109C	20.9642	-0.232675	0.741522	-0.313779	0.753689	0.999774
YLR386W	11.3206	0.533078	1.02065	0.522294	0.601466	0.999774
YPL104W	12.9718	1.56605	0.966369	1.62055	0.105114	0.999774
YLR178C	13.5158	1.43745	0.941458	1.52683	0.126803	0.999774
YLR179C	34.5235	0.879204	0.602937	1.4582	0.144785	0.999774
YLR176C	13.7041	1.08618	0.960672	1.13065	0.258203	0.999774
YLR177W	18.999	1.18744	0.780857	1.52069	0.128338	0.999774
YLR180W	19.9558	0.404693	0.760711	0.531993	0.594731	0.999774
YKR049C	8.27116	1.28592	1.22785	1.04729	0.294964	0.999774
YLR240W	10.6055	-1.38172	1.15536	-1.19591	0.23173	0.999774
YLR241W	18.6884	0.226609	0.780559	0.290316	0.771574	0.999774
YIL031W	28.1616	-0.999367	0.68335	-1.46245	0.143617	0.999774
YMR126C	8.65955	-0.0797872	1.20724	-0.0660907	0.947306	0.999774
YLR006C	20.162	-1.07789	0.788676	-1.36671	0.171715	0.999774
YJL095W	27.0861	-0.939612	0.672013	-1.39821	0.162051	0.999774
YNR073C	10.6482	0.188188	1.05939	0.177639	0.859007	0.999774
YMR127C	13.3824	0.046876	0.958543	0.0489033	0.960996	0.999774
YLR001C	81.2722	-0.871931	0.422059	-2.0659	0.038838	0.999774
YLL003W	9.7462	-0.822729	1.13241	-0.726531	0.467513	0.999774
YLL002W	9.5321	-0.423014	1.12844	-0.374867	0.70776	0.999774
YLR004C	23.635	-0.287046	0.709358	-0.404656	0.68573	0.999774
YBR261C	13.0539	0.200008	0.953395	0.209785	0.833835	0.999774
YBR260C	25.521	-0.313966	0.677113	-0.463684	0.642874	0.999774
YBR259W	20.9363	-0.675847	0.77735	-0.869425	0.384615	0.999774
YIL111W	9.94023	0.498914	1.10292	0.452356	0.651012	0.999774
YIL112W	20.4535	-0.995578	0.768846	-1.2949	0.195355	0.999774
YOL036W	18.9925	0.263623	0.775345	0.340007	0.733851	0.999774
YBR263W	20.5715	-0.27094	0.749127	-0.361674	0.717596	0.999774
YIL115C	33.6537	-1.12487	0.632086	-1.77962	0.0751383	0.999774
YIL116W	23.3825	-0.19334	0.702361	-0.275272	0.783107	0.999774
YIL113W	21.6736	-0.167172	0.728071	-0.229609	0.818396	0.999774
YIL119C	22.2481	-1.55781	0.760364	-2.04877	0.0404847	0.999774
YIL120W	37.5639	-1.20396	0.598632	-2.01118	0.0443063	0.999774
YIL117C	8.36726	-0.519894	1.22124	-0.425711	0.670319	0.999774
YIL118W	11.4809	-0.624559	1.03159	-0.605433	0.544892	0.999774
YMR299C	8.81233	0.204407	1.17286	0.174281	0.861645	0.999774
YCR108C	19.6222	-0.246422	0.765845	-0.321765	0.74763	0.999774
YCR107W	10.0288	0.483423	1.11393	0.433981	0.664302	0.999774
YHL035C	38.902	-0.30421	0.567576	-0.53598	0.591972	0.999774
YOR389W	19.0309	0.321464	0.773959	0.41535	0.677885	0.999774
YHL039W	15.8953	-1.50896	0.900751	-1.67523	0.0938893	0.999774
YHL040C	31.9204	-1.03137	0.639416	-1.61299	0.106746	0.999774
YHL036W	30.8403	-0.0736346	0.623875	-0.118028	0.906046	0.999774
YHL038C	8.29411	0.506454	1.20758	0.419395	0.674927	0.999774
YHL044W	9.46934	-0.240685	1.13813	-0.211474	0.832517	0.999774
YHL042W	19.1528	-0.429515	0.781607	-0.549528	0.582643	0.999774
YJR058C	13.6349	-0.11406	0.925675	-0.123218	0.901935	0.999774
YJR053W	18.9631	-0.403557	0.799308	-0.504883	0.613641	0.999774
YJR054W	13.6592	-0.332727	0.928562	-0.358325	0.7201	0.999774
YJR051W	22.1675	-0.151428	0.722673	-0.209538	0.834028	0.999774
YJR052W	14.0903	-0.180698	0.910544	-0.19845	0.842693	0.999774
YJR059W	21.8587	0.851751	0.725895	1.17338	0.240643	0.999774
YJL097W	8.59319	-1.47934	1.29852	-1.13925	0.254599	0.999774
YAL053W	38.3594	-0.159461	0.569612	-0.279946	0.779519	0.999774
YOR033C	15.2168	-0.235051	0.877302	-0.267925	0.788757	0.999774
YMR121C	11.5422	-1.31311	1.05769	-1.24149	0.214426	0.999774
YLR220W	8.98949	0.172756	1.1568	0.14934	0.881286	0.999774
YOR151C	10.9767	0.00296352	1.03747	0.00285649	0.997721	0.999774
YOR144C	19.118	0.0979918	0.77568	0.12633	0.899471	0.999774
YML053C	10.3469	0.889279	1.07721	0.825542	0.409064	0.999774
YMR124W	23.1684	-0.0454109	0.707052	-0.0642257	0.948791	0.999774
YCL048W	23.4725	-0.0105399	0.706356	-0.0149215	0.988095	0.999774
YOL095C	11.5362	0.597281	1.01078	0.590913	0.554578	0.999774
YMR125W	12.1917	-0.0899841	0.991519	-0.0907538	0.927688	0.999774
YMR301C	15.7336	-0.723776	0.872138	-0.829887	0.406602	0.999774
YJL098W	34.4323	-0.392947	0.598586	-0.656458	0.511529	0.999774
YGR116W	25.7211	-0.639962	0.679958	-0.941179	0.346613	0.999774
YLR390W	8.4365	1.48351	1.24377	1.19275	0.232968	0.999774
YGR117C	10.0658	0.188252	1.08874	0.172909	0.862723	0.999774
YGR119C	12.2559	0.129988	0.991671	0.13108	0.895712	0.999774
YGR121W-A	32.5463	-0.377166	0.611298	-0.616993	0.537239	0.999774
YGR121C	42.13	-0.311455	0.554975	-0.561206	0.574657	0.999774
YGR123C	26.2681	-0.302179	0.682096	-0.443016	0.657754	0.999774
YGR122W	16.0635	-0.54106	0.860815	-0.628543	0.529648	0.999774
YPL191C	10.5456	-0.177604	1.06256	-0.167148	0.867254	0.999774
YGR146C-A	13.6592	-0.332727	0.928562	-0.358325	0.7201	0.999774
YGR146C	11.3938	-0.192581	1.03449	-0.186161	0.852318	0.999774
YGR147C	8.88692	-0.27165	1.18621	-0.229007	0.818863	0.999774
YGR150C	9.14875	2.4458	1.21212	2.01778	0.0436138	0.999774
YGR149W	12.0788	0.153037	0.985417	0.155302	0.876584	0.999774
YGR152C	11.6706	-0.665403	1.01978	-0.652493	0.514083	0.999774
YGR154C	14.6882	0.38845	0.886908	0.437982	0.6614	0.999774
YIL057C	15.5349	0.0863905	0.861008	0.100336	0.920077	0.999774
YLR034C	15.5962	-0.301387	0.879563	-0.342655	0.731858	0.999774
YLR035C	23.8548	0.295908	0.695471	0.425479	0.670488	0.999774
YJL092W	19.8303	0.55931	0.757444	0.738417	0.460261	0.999774
YJL093C	20.5819	-0.651511	0.758808	-0.858599	0.390562	0.999774
YEL063C	16.8755	-0.180769	0.827897	-0.218347	0.827159	0.999774
YEL062W	22.0559	0.175256	0.721018	0.243067	0.807953	0.999774
YEL061C	23.4955	-0.327605	0.704682	-0.464898	0.642005	0.999774
YEL060C	33.4379	0.128573	0.607483	0.211649	0.832381	0.999774
YEL067C	39.229	-0.480793	0.567704	-0.846907	0.397047	0.999774
YEL066W	27.1044	-0.202596	0.661039	-0.306482	0.759238	0.999774
YEL065W	32.5054	0.51677	0.608244	0.84961	0.395542	0.999774
YEL064C	11.8862	-0.558532	1.00674	-0.554795	0.579035	0.999774
YDR502C	16.6768	0.49752	0.82807	0.600819	0.547961	0.999774
YJL073W	18.2264	-0.88336	0.812072	-1.08779	0.27669	0.999774
YOR238W	14.6756	0.41052	0.911399	0.450428	0.652402	0.999774
YOR246C	14.6165	1.17428	0.895799	1.31087	0.189901	0.999774
YOR245C	8.35543	-0.178223	1.25887	-0.141573	0.887417	0.999774
YJL200C	29.7698	0.472718	0.681234	0.693915	0.487735	0.999774
YJL079C	19.8274	0.152058	0.768607	0.197836	0.843173	0.999774
YJL100W	22.4103	0.150475	0.718485	0.209434	0.834109	0.999774
YJL078C	88.5199	-0.0809883	0.400756	-0.202089	0.839847	0.999774
YJL077C	46.2529	-0.609544	0.532332	-1.14505	0.25219	0.999774
YJL074C	13.9236	-0.720798	0.93161	-0.773713	0.439101	0.999774
YJL076W	26.5937	-0.763791	0.676459	-1.1291	0.258855	0.999774
YPR021C	11.9002	-0.182747	1.01963	-0.179229	0.857758	0.999774
YDR436W	28.1319	0.0234261	0.645082	0.0363149	0.971031	0.999774
YDR438W	13.7374	0.167373	0.924864	0.18097	0.856391	0.999774
YDR440W	17.4719	0.0649406	0.827958	0.0784346	0.937482	0.999774
YDR441C	9.18065	0.551251	1.14076	0.483231	0.628932	0.999774
YDR443C	28.3047	-0.467462	0.657468	-0.711004	0.477082	0.999774
YDR444W	19.1808	0.0147764	0.782485	0.0188839	0.984934	0.999774
YGL092W	7.78484	-0.581249	1.27989	-0.454138	0.64973	0.999774
YGL096W	18.2817	-0.0189775	0.791671	-0.0239715	0.980875	0.999774
YGL094C	31.2347	-1.33767	0.649693	-2.05893	0.039501	0.999774
YER014W	8.90235	0.641028	1.17326	0.546366	0.584814	0.999774
YDR170C	20.796	-0.845443	0.756825	-1.11709	0.263955	0.999774
YDR170W-A	13.1565	0.475134	0.940465	0.505211	0.61341	0.999774
YLR439W	8.48526	0.890809	1.19923	0.742815	0.457594	0.999774
YLR438W	50.4848	1.09622	0.508681	2.15502	0.0311604	0.999774
YDR166C	15.0382	-0.531912	0.893671	-0.595199	0.551711	0.999774
YDR163W	8.31849	0.188568	1.20599	0.156359	0.87575	0.999774
YDR164C	11.9504	-0.303302	0.996813	-0.304272	0.760921	0.999774
YDR168W	12.7713	-0.838234	0.983431	-0.852357	0.394016	0.999774
YPL019C	28.0139	-0.437182	0.652894	-0.669607	0.503109	0.999774
YMR297W	33.057	0.0351126	0.603627	0.0581694	0.953614	0.999774
YPL216W	20.7627	-0.0798252	0.744582	-0.107208	0.914624	0.999774
YPR079W	16.6112	0.101744	0.836164	0.121679	0.903153	0.999774
YNL267W	10.1403	-0.226974	1.10204	-0.205958	0.836823	0.999774
YNL194C	9.09351	0.997767	1.15772	0.861837	0.388777	0.999774
YLR069C	21.012	1.07838	0.740785	1.45573	0.145467	0.999774
YLR353W	19.5337	-0.239858	0.768659	-0.312047	0.755004	0.999774
YMR318C	33.7772	0.95335	0.599951	1.58905	0.11205	0.999774
YMR319C	27.1772	0.796655	0.68969	1.15509	0.248053	0.999774
YMR317W	19.4709	-0.153845	0.767664	-0.200407	0.841162	0.999774
YDR301W	15.0486	-1.12616	0.906402	-1.24245	0.214071	0.999774
YDR294C	22.9195	0.498319	0.705286	0.706549	0.479847	0.999774
YDR295C	9.1681	0.584885	1.24814	0.468604	0.639352	0.999774
YDR297W	28.7731	0.818859	0.681445	1.20165	0.229499	0.999774
YMR011W	22.7165	0.450541	0.724249	0.62208	0.533889	0.999774
YMR012W	27.6735	-0.258967	0.664834	-0.389521	0.696891	0.999774
YDR303C	9.11501	-0.183729	1.16441	-0.157787	0.874624	0.999774
YMR006C	34.5284	-0.944012	0.608379	-1.55168	0.120738	0.999774
YLR422W	28.303	0.672705	0.654774	1.02739	0.304239	0.999774
YPR147C	16.0058	0.518077	0.84625	0.612203	0.540403	0.999774
YLR354C	11.2475	1.20418	1.03256	1.1662	0.243534	0.999774
YLR424W	8.31849	0.188568	1.20599	0.156359	0.87575	0.999774
YCL001W-B	16.175	-1.12004	0.874685	-1.28051	0.200367	0.999774
YER113C	25.7685	-1.15058	0.693974	-1.65796	0.0973247	0.999774
YER114C	44.7061	0.120919	0.533399	0.226695	0.820661	0.999774
YER110C	13.9465	-1.4515	0.960365	-1.51141	0.130685	0.999774
YER111C	22.7373	-0.130359	0.714196	-0.182526	0.85517	0.999774
YER105C	38.0154	-0.337556	0.573147	-0.588952	0.555893	0.999774
YNL218W	22.3328	-0.0458465	0.735713	-0.0623158	0.950311	0.999774
YLR355C	8.75101	0.833987	1.19662	0.696952	0.485833	0.999774
YOL043C	10.4674	-0.939004	1.09915	-0.854299	0.39294	0.999774
YNL217W	19.245	0.15095	0.777732	0.19409	0.846105	0.999774
YNL216W	18.3164	-0.596476	0.817526	-0.729611	0.465628	0.999774
YOL042W	11.1036	0.0977395	1.03266	0.094648	0.924594	0.999774
YCL002C	19.6312	-0.921258	0.782237	-1.17772	0.238907	0.999774
YMR228W	11.4078	0.163423	1.01501	0.161007	0.872088	0.999774
YMR229C	16.7743	-0.157153	0.837071	-0.187742	0.851079	0.999774
YMR226C	12.8383	0.132774	0.962335	0.13797	0.890264	0.999774
YMR227C	9.61924	-0.987078	1.14339	-0.863292	0.387977	0.999774
YMR231W	20.7487	-0.283317	0.746059	-0.379752	0.70413	0.999774
YMR232W	16.1005	-0.768066	0.86427	-0.888687	0.374172	0.999774
YMR230W-A	9.54753	0.451404	1.11618	0.40442	0.685904	0.999774
YMR233W	8.12734	-0.275094	1.23105	-0.223463	0.823175	0.999774
YDL175C	10.3182	-0.0180787	1.14602	-0.0157751	0.987414	0.999774
YPR149W	17.0118	1.4073	0.830314	1.6949	0.0900952	0.999774
YNL221C	12.1017	-0.459041	0.99454	-0.461562	0.644396	0.999774
YPR026W	34.2796	-0.478086	0.599677	-0.79724	0.425312	0.999774
YBR066C	13.3616	0.983369	0.953848	1.03095	0.302564	0.999774
YHR022C	12.583	-0.396776	0.980223	-0.404782	0.685638	0.999774
YBR062C	8.1797	0.359834	1.28797	0.27938	0.779953	0.999774
YBR061C	12.1659	-0.215861	0.985724	-0.218987	0.82666	0.999774
YBR065C	9.42057	0.353513	1.12646	0.313827	0.753652	0.999774
YOR107W	15.5076	-0.292761	0.892889	-0.32788	0.743002	0.999774
YBR059C	26.3861	0.17257	0.667185	0.258654	0.795902	0.999774
YOL097W-A	7.82465	0.17023	1.26161	0.13493	0.892667	0.999774
YHR023W	37.6177	-0.843063	0.584835	-1.44154	0.149432	0.999774
YNL271C	15.8864	-0.525487	0.860425	-0.610729	0.541379	0.999774
YOL103W	13.8687	1.09367	0.942047	1.16095	0.245661	0.999774
YMR074C	10.7228	-0.202468	1.06326	-0.190422	0.848978	0.999774
YOL100W	15.6619	0.151714	0.858643	0.17669	0.859752	0.999774
YHR028C	31.408	-0.266831	0.640186	-0.416801	0.676824	0.999774
YDR073W	14.0724	1.28149	0.928408	1.3803	0.167493	0.999774
YPL020C	9.6605	0.159054	1.11559	0.142574	0.886627	0.999774
YMR068W	10.9265	0.123282	1.06263	0.116016	0.90764	0.999774
YPR015C	18.9129	-0.32411	0.783202	-0.413827	0.679001	0.999774
YHR027C	13.4785	-1.38226	0.993883	-1.39077	0.164295	0.999774
YMR067C	13.2576	0.439056	0.954211	0.460125	0.645427	0.999774
YJR072C	17.875	-0.292579	0.805643	-0.363162	0.716484	0.999774
YNL270C	24.7783	0.199766	0.682111	0.292864	0.769626	0.999774
YMR070W	21.0152	-0.183257	0.764488	-0.239713	0.810553	0.999774
YJR073C	15.8516	0.116092	0.870041	0.133432	0.893852	0.999774
YMR069W	80.5454	-0.0300968	0.417176	-0.0721441	0.942487	0.999774
YDL121C	10.6726	-0.0720283	1.0566	-0.0681699	0.94565	0.999774
YDL001W	44.7732	0.361706	0.542286	0.667002	0.504771	0.999774
YNL065W	25.2596	0.217052	0.676751	0.320726	0.748418	0.999774
YMR184W	11.3066	0.201441	1.05103	0.191661	0.848008	0.999774
YNL269W	24.2726	0.292332	0.706319	0.413881	0.678961	0.999774
YMR183C	8.28763	-3.18237	1.51748	-2.09714	0.0359815	0.999774
YJR078W	58.4435	0.132062	0.475767	0.277577	0.781337	0.999774
YMR179W	11.6387	0.888091	1.00774	0.881267	0.378173	0.999774
YPL038W	9.61029	0.290618	1.12159	0.259114	0.795548	0.999774
YNL064C	10.1145	-0.38405	1.09105	-0.352	0.724838	0.999774
YMR178W	11.1538	-0.0216092	1.03864	-0.0208053	0.983401	0.999774
YKR096W	57.9957	1.1085	0.506004	2.19069	0.0284744	0.999774
YKR095W-A	9.11037	2.34204	1.26926	1.84521	0.0650069	0.999774
YNR013C	36.308	-0.201627	0.583149	-0.345756	0.729526	0.999774
YNR014W	24.4433	-0.543392	0.694282	-0.782668	0.433822	0.999774
YNR015W	40.9135	-0.405705	0.557081	-0.728269	0.466449	0.999774
YMR180C	20.3574	-0.100897	0.750618	-0.134418	0.893072	0.999774
YNR009W	10.4481	0.835369	1.08386	0.770733	0.440865	0.999774
YKR098C	22.9468	0.731046	0.728424	1.0036	0.315572	0.999774
YNR011C	11.912	-0.417922	1.00612	-0.415378	0.677865	0.999774
YNR012W	11.3679	-0.330859	1.02396	-0.323116	0.746608	0.999774
YNL277W	36.18	0.694226	0.581581	1.19369	0.2326	0.999774
YER144C	34.7982	0.578256	0.589722	0.980557	0.326811	0.999774
YJL181W	18.1045	-0.00432031	0.797089	-0.0054201	0.995675	0.999774
YPR145W	56.8954	0.582447	0.480936	1.21107	0.225869	0.999774
YER145C	64.4005	0.406175	0.45639	0.889972	0.373481	0.999774
YKR100C	12.9911	0.320484	0.974228	0.328962	0.742185	0.999774
YKR099W	27.1173	1.13737	0.659771	1.72388	0.0847294	0.999774
YER147C	12.3904	-1.24478	1.01213	-1.22986	0.218748	0.999774
YKR102W	30.7876	0.891851	0.631981	1.4112	0.158186	0.999774
YDR238C	11.1628	-1.23833	1.08596	-1.14031	0.254155	0.999774
YKR101W	26.8128	-0.245796	0.665921	-0.369107	0.712048	0.999774
YNL275W	16.8511	-0.0100926	0.828148	-0.0121869	0.990277	0.999774
YER149C	17.9237	-0.653056	0.815672	-0.800636	0.423343	0.999774
YDL176W	23.9649	-0.18346	0.6943	-0.264238	0.791597	0.999774
YCR091W	49.799	-0.478276	0.514037	-0.930431	0.352148	0.999774
YLR336C	14.7857	-0.379546	0.89353	-0.424771	0.671004	0.999774
YKL046C	24.1934	1.33726	0.71615	1.8673	0.0618602	0.999774
YKL043W	12.7039	1.17789	1.01385	1.1618	0.245317	0.999774
YKL044W	12.9409	0.416207	0.948803	0.438665	0.660904	0.999774
YKL050C	40.3928	0.413477	0.556196	0.743401	0.457239	0.999774
YKL047W	25.6455	0.862857	0.696482	1.23888	0.215391	0.999774
YPL095C	27.2586	0.0549986	0.674786	0.0815052	0.93504	0.999774
YPR159W	15.9968	1.13797	0.856815	1.32814	0.184131	0.999774
YPL181W	14.1147	-0.396497	0.914648	-0.433497	0.664654	0.999774
YNL274C	10.0428	0.840863	1.08832	0.772622	0.439746	0.999774
YNL061W	14.2919	-0.414538	0.919782	-0.450691	0.652212	0.999774
YPL094C	10.1145	-0.38405	1.09105	-0.352	0.724838	0.999774
YNL001W	10.3315	0.147033	1.08052	0.136076	0.891761	0.999774
YOR123C	12.0389	-0.314025	0.993763	-0.315996	0.752006	0.999774
YPL150W	17.0681	0.288202	0.818267	0.35221	0.724681	0.999774
YNL273W	15.5335	-0.19336	0.869646	-0.222344	0.824046	0.999774
YDR001C	66.8108	0.0563322	0.44948	0.125328	0.900264	0.999774
YMR031C	17.7222	-0.453573	0.810777	-0.55943	0.575868	0.999774
YHR102W	12.3904	-1.24478	1.01213	-1.22986	0.218748	0.999774
YHR103W	23.2541	-0.445327	0.708271	-0.628752	0.529511	0.999774
YHR098C	24.6195	0.841698	0.683906	1.23072	0.218427	0.999774
YHR099W	44.1477	-0.953406	0.549249	-1.73584	0.0825928	0.999774
YDL190C	32.7234	-0.385027	0.610308	-0.630874	0.528123	0.999774
YLL010C	30.5896	-1.29936	0.650268	-1.99819	0.0456962	0.999774
YLL011W	11.3281	-0.916897	1.04432	-0.877988	0.37995	0.999774
YLL012W	30.1937	-0.170977	0.63027	-0.271275	0.786179	0.999774
YPR192W	16.8385	0.00662138	0.837052	0.00791035	0.993689	0.999774
YMR027W	11.7976	-0.547971	1.01515	-0.539795	0.589339	0.999774
YDL197C	22.4242	0.320575	0.71263	0.449848	0.65282	0.999774
YDL194W	14.0645	-0.291303	0.919911	-0.316664	0.751499	0.999774
YLL005C	16.846	-1.06836	0.856081	-1.24797	0.212042	0.999774
YLR188W	25.2456	0.0622384	0.688039	0.0904577	0.927924	0.999774
YLR187W	27.3981	0.0832077	0.651976	0.127624	0.898447	0.999774
YLR190W	16.7639	0.247567	0.826382	0.29958	0.764498	0.999774
YLR189C	22.7424	0.511144	0.710539	0.719375	0.47191	0.999774
YLR194C	12.5791	1.55611	1.01122	1.53884	0.123844	0.999774
YLR196W	10.5072	-0.302152	1.07687	-0.280583	0.77903	0.999774
YOR343W-B	13.3551	-0.405769	0.941922	-0.430789	0.666622	0.999774
YPL092W	20.9951	0.538395	0.73593	0.731585	0.464422	0.999774
YLR017W	9.37037	0.483028	1.14666	0.421248	0.673574	0.999774
YOL062C	11.7901	0.74383	1.00155	0.742677	0.457677	0.999774
YLR011W	15.9018	0.0335285	0.851249	0.0393874	0.968582	0.999774
YLR015W	8.00038	-0.429009	1.25539	-0.341733	0.732552	0.999774
YLR014C	25.4493	0.193978	0.673121	0.288177	0.773211	0.999774
YBR274W	11.7488	-0.0336467	1.01972	-0.0329961	0.973678	0.999774
YBR275C	60.1739	-0.0742391	0.472396	-0.157154	0.875123	0.999774
YBR276C	25.7366	-0.272157	0.674018	-0.403783	0.686372	0.999774
YBR270C	12.2943	0.223461	0.975723	0.22902	0.818853	0.999774
YBR271W	18.112	-0.984123	0.819716	-1.20057	0.22992	0.999774
YBR272C	8.29267	0.0149793	1.22916	0.0121867	0.990277	0.999774
YBR273C	9.24341	0.384663	1.14163	0.336942	0.736161	0.999774
YPR042C	15.0565	0.593342	0.875271	0.677896	0.497838	0.999774
YPL091W	15.2168	-0.235051	0.877302	-0.267925	0.788757	0.999774
YBR280C	23.8365	-0.428111	0.700386	-0.61125	0.541034	0.999774
YGR289C	14.0261	-0.387496	0.916419	-0.422838	0.672414	0.999774
YGR295C	11.7259	0.541185	1.00624	0.537829	0.590695	0.999774
YHR017W	22.9618	-0.624444	0.722855	-0.863858	0.387666	0.999774
YHL048W	8.88692	-0.27165	1.18621	-0.229007	0.818863	0.999774
YHL047C	23.5184	-0.675853	0.709054	-0.953175	0.340501	0.999774
YPR152C	30.4784	0.431239	0.622942	0.692261	0.488773	0.999774
YHR021W-A	13.4089	0.313446	0.953243	0.328821	0.742291	0.999774
YPL067C	38.1611	1.08769	0.576203	1.88768	0.0590683	0.999774
YJR066W	74.2775	-0.0709059	0.431949	-0.164153	0.86961	0.999774
YJL090C	12.9011	0.0080452	0.952784	0.00844389	0.993263	0.999774
YJR062C	8.02476	-0.857658	1.27538	-0.672475	0.501281	0.999774
YJR061W	43.8285	-0.153275	0.54006	-0.283811	0.776556	0.999774
YJR064W	19.217	-0.274239	0.779461	-0.351832	0.724964	0.999774
YLR405W	11.9428	0.928874	0.993496	0.934955	0.349811	0.999774
YLR409C	15.4538	-1.04802	0.8932	-1.17333	0.240665	0.999774
YOR114W	8.35831	0.793783	1.20399	0.659296	0.509706	0.999774
YOR112W	8.50821	0.121595	1.21055	0.100447	0.91999	0.999774
YOR113W	10.1698	0.920859	1.08426	0.849297	0.395716	0.999774
YOR118W	19.7366	-0.173977	0.772871	-0.225105	0.821897	0.999774
YOR119C	12.2272	-0.762819	1.01927	-0.748394	0.454222	0.999774
YOR116C	12.9882	-0.348486	0.954222	-0.365205	0.714958	0.999774
YPR153W	13.9634	-0.264009	0.918933	-0.2873	0.773883	0.999774
YDL168W	14.9127	-0.296905	0.885306	-0.33537	0.737346	0.999774
YOR120W	25.43	0.837395	0.698835	1.19827	0.230811	0.999774
YNL054W-B	17.6684	-1.15309	0.838535	-1.37512	0.169094	0.999774
YJL089W	20.6357	-0.133459	0.745544	-0.179009	0.85793	0.999774
YLR378C	9.8746	-0.187298	1.10189	-0.169979	0.865027	0.999774
YLR238W	9.92984	1.10803	1.10736	1.00061	0.317018	0.999774
YPR049C	22.0279	-0.191149	0.732302	-0.261025	0.794073	0.999774
YPL089C	15.8301	0.783803	0.852768	0.919128	0.358029	0.999774
YLR040C	9.15483	0.40084	1.16123	0.345185	0.729956	0.999774
YMR295C	8.45584	-0.535196	1.22638	-0.436402	0.662545	0.999774
YPL140C	14.9281	0.264378	0.878529	0.300933	0.763466	0.999774
YPL223C	10.6112	0.467189	1.0712	0.436136	0.662738	0.999774
YJL088W	19.6545	0.773782	0.761839	1.01568	0.309783	0.999774
YPL147W	17.5863	0.139492	0.806256	0.173012	0.862642	0.999774
YGR161C	14.2481	0.982657	0.914004	1.07511	0.282325	0.999774
YGR161W-C	9.80145	0.634497	1.11971	0.566663	0.570943	0.999774
YIL074C	32.7995	-0.38205	0.627049	-0.609282	0.542337	0.999774
YIL073C	20.9502	-0.445185	0.754266	-0.590222	0.555042	0.999774
YGR156W	12.267	-0.246546	1.00963	-0.244195	0.80708	0.999774
YGR157W	11.359	0.623731	1.02062	0.611128	0.541115	0.999774
YLR019W	24.1303	-0.084593	0.698427	-0.121119	0.903597	0.999774
YLR018C	9.53354	0.0510117	1.13649	0.0448853	0.964199	0.999774
YLR020C	15.9093	-1.09831	0.87981	-1.24835	0.211904	0.999774
YLR024C	87.277	0.669991	0.420776	1.59227	0.111323	0.999774
YPR005C	9.65906	-0.29416	1.11748	-0.263236	0.792369	0.999774
YPR006C	37.2727	0.0130838	0.574638	0.0227688	0.981835	0.999774
YPR003C	21.3326	-0.0591833	0.737379	-0.0802617	0.936029	0.999774
YOR298C-A	16.665	0.630604	0.865225	0.728833	0.466104	0.999774
YPR001W	92.8931	-0.334977	0.405721	-0.825634	0.409012	0.999774
YPR002W	60.0957	-0.189898	0.471867	-0.40244	0.687361	0.999774
YPL002C	7.8476	-0.826634	1.2728	-0.64946	0.516041	0.999774
YPL001W	35.0316	-0.00304913	0.592135	-0.00514938	0.995891	0.999774
YNL151C	8.73414	-0.605405	1.1917	-0.508019	0.61144	0.999774
YOL166W-A	7.78484	-0.581249	1.27989	-0.454138	0.64973	0.999774
YGR171C	12.9563	0.993682	0.95176	1.04405	0.296464	0.999774
YNL233W	29.1507	-0.740986	0.661717	-1.11979	0.262802	0.999774
YPR008W	38.7123	-0.291241	0.571627	-0.509494	0.610406	0.999774
YPL179W	13.9211	1.40945	0.932539	1.51141	0.130684	0.999774
YNL317W	8.46839	-0.561558	1.22242	-0.459384	0.645959	0.999774
YPR047W	14.3227	0.727459	0.904164	0.804566	0.42107	0.999774
YGL237C	8.81233	0.204407	1.17286	0.174281	0.861645	0.999774
YML116W	19.0154	-0.105691	0.776342	-0.136139	0.891711	0.999774
YPL127C	9.11501	-0.183729	1.16441	-0.157787	0.874624	0.999774
YNL046W	15.952	-0.0507277	0.858292	-0.0591032	0.95287	0.999774
YNL314W	12.2545	-0.226526	0.982742	-0.230504	0.8177	0.999774
YCR020C	11.0947	1.01153	1.05243	0.961135	0.336484	0.999774
YJL085W	10.2031	-0.396633	1.0887	-0.364318	0.715621	0.999774
YNL054W	14.6329	-0.581989	0.900419	-0.646353	0.518051	0.999774
YNL054W-A	9.79641	-1.0116	1.13844	-0.88858	0.374229	0.999774
YNL049C	14.8011	0.198396	0.88376	0.224491	0.822375	0.999774
YNL050C	10.0747	-1.06785	1.11869	-0.954554	0.339803	0.999774
YML120C	26.1512	0.772684	0.66739	1.15777	0.246958	0.999774
YGL083W	25.208	0.102839	0.683435	0.150473	0.880391	0.999774
YDR453C	17.1168	-0.0336657	0.821875	-0.040962	0.967326	0.999774
YDR452W	22.591	0.58527	0.711775	0.822268	0.410925	0.999774
YDR451C	13.2117	1.41032	0.950451	1.48385	0.137849	0.999774
YIL166C	27.4042	-0.698749	0.664741	-1.05116	0.293185	0.999774
YGL077C	23.3861	0.266477	0.724032	0.368046	0.712839	0.999774
YIL163C	15.5851	0.00115684	0.872213	0.00132633	0.998942	0.999774
YDR458C	11.8736	-0.5394	1.03108	-0.52314	0.600877	0.999774
YDR457W	63.9898	0.715345	0.45939	1.55716	0.119432	0.999774
YLR060W	9.87603	0.246653	1.10175	0.223874	0.822856	0.999774
YGR162W	7.8476	-0.826634	1.2728	-0.64946	0.516041	0.999774
YLR449W	8.81089	-0.283767	1.20597	-0.235302	0.813974	0.999774
YER022W	9.70782	-0.999369	1.13863	-0.877696	0.380109	0.999774
YDR151C	11.785	-0.52841	1.02284	-0.516609	0.605429	0.999774
YDR153C	11.7915	1.0743	1.00428	1.06973	0.284742	0.999774
YER016W	9.24485	0.810847	1.14024	0.711121	0.477009	0.999774
YER015W	18.419	-0.348999	0.800203	-0.436138	0.662737	0.999774
YOR354C	26.9183	0.220111	0.65652	0.335269	0.737422	0.999774
YOR355W	8.86901	2.08806	1.20804	1.72847	0.0839032	0.999774
YPL133C	31.3201	-0.197688	0.623843	-0.316888	0.751329	0.999774
YOR348C	277.687	0.171839	0.235286	0.730338	0.465183	0.999774
YOR349W	65.0747	-0.0169191	0.457677	-0.0369673	0.970511	0.999774
YOR346W	34.1666	-0.381693	0.599603	-0.636576	0.524401	0.999774
YOR347C	12.2993	1.32515	1.02474	1.29316	0.195955	0.999774
YOR350C	13.3706	0.230559	0.935629	0.246421	0.805356	0.999774
YOR351C	20.6705	-0.657498	0.761225	-0.863737	0.387733	0.999774
YPR179C	28.422	-0.0915591	0.648256	-0.141239	0.887681	0.999774
YPL235W	11.3281	-0.916897	1.04432	-0.877988	0.37995	0.999774
YDR313C	8.9149	0.602391	1.19474	0.504203	0.614119	0.999774
YDR312W	12.4575	-0.124344	1.02548	-0.121255	0.903489	0.999774
YJL083W	29.2813	-0.26212	0.637102	-0.411426	0.68076	0.999774
YDR307W	14.2173	-0.101043	0.905573	-0.111579	0.911157	0.999774
YDR306C	12.597	-0.0554385	0.965158	-0.0574398	0.954195	0.999774
YDR305C	15.9047	0.549288	0.866921	0.633608	0.526337	0.999774
YDR304C	11.912	-0.417922	1.00612	-0.415378	0.677865	0.999774
YDR310C	32.6951	0.49755	0.615353	0.80856	0.418768	0.999774
YDR309C	13.2436	0.156003	0.93757	0.166391	0.867849	0.999774
YEL069C	18.873	-0.660881	0.791293	-0.835191	0.40361	0.999774
YMR004W	23.1684	-0.0454109	0.707052	-0.0642257	0.948791	0.999774
YMR003W	11.3421	-0.473765	1.03949	-0.455765	0.648559	0.999774
YEL077C	16.8357	-0.541142	0.835419	-0.64775	0.517147	0.999774
YEL070W	11.695	-0.976438	1.02937	-0.948574	0.342837	0.999774
YEL071W	37.5396	1.0171	0.594588	1.7106	0.0871558	0.999774
YEL072W	23.6866	-0.155794	0.698688	-0.222981	0.82355	0.999774
YNL134C	17.5081	-0.248834	0.815139	-0.305265	0.760164	0.999774
YKL188C	23.1853	0.479083	0.711496	0.673347	0.500727	0.999774
YDL049C	24.0356	0.695389	0.693123	1.00327	0.315731	0.999774
YKL189W	8.07105	2.19145	1.2814	1.7102	0.0872288	0.999774
YLR381W	14.511	0.408471	0.906022	0.45084	0.652105	0.999774
YPL236C	17.9865	-0.760053	0.812783	-0.935125	0.349724	0.999774
YER096W	11.1922	0.0854233	1.02595	0.0832628	0.933643	0.999774
YER095W	8.68681	0.558315	1.18885	0.469627	0.638621	0.999774
YER101C	18.0787	-0.0863245	0.812328	-0.106268	0.91537	0.999774
YER099C	9.67089	-0.603096	1.17722	-0.512305	0.608437	0.999774
YER098W	17.7878	-0.0336189	0.807722	-0.0416218	0.9668	0.999774
YLR138W	28.1807	-0.180706	0.646511	-0.27951	0.779853	0.999774
YER103W	20.446	-0.107364	0.751529	-0.142861	0.8864	0.999774
YDL239C	9.52315	0.719537	1.12135	0.641667	0.521089	0.999774
YDR076W	29.9986	0.552299	0.629519	0.877335	0.380305	0.999774
YLR137W	34.943	0.00088507	0.59097	0.00149766	0.998805	0.999774
YHR075C	12.0788	0.153037	0.985417	0.155302	0.876584	0.999774
YLR136C	8.92386	-0.658664	1.1837	-0.556446	0.577906	0.999774
YLR382C	15.5105	0.261345	0.861376	0.303404	0.761582	0.999774
YOR341W	10.4082	0.362503	1.07872	0.336048	0.736834	0.999774
YLR135W	22.8643	-0.0814691	0.709398	-0.114843	0.90857	0.999774
YOL017W	29.2827	-0.108571	0.635908	-0.170734	0.864433	0.999774
YLR049C	9.20503	0.265959	1.14118	0.233056	0.815718	0.999774
YKL181W	18.8734	1.35809	0.79393	1.71059	0.0871564	0.999774
YMR219W	35.7012	-0.126037	0.586371	-0.214944	0.829811	0.999774
YMR221C	23.9879	-0.507991	0.700518	-0.725164	0.468351	0.999774
YMR223W	20.2384	0.949966	0.756915	1.25505	0.209461	0.999774
YMR224C	15.9506	-0.334046	0.854889	-0.390748	0.695983	0.999774
YFL036W	36.5662	0.211948	0.58894	0.35988	0.718937	0.999774
YIR003W	28.4908	-0.963334	0.658372	-1.46321	0.143411	0.999774
YOL063C	22.2198	0.0858744	0.752776	0.114077	0.909177	0.999774
YBR076W	18.0174	0.235677	0.79565	0.296207	0.767072	0.999774
YBR073W	16.3949	-0.0954498	0.914133	-0.104416	0.91684	0.999774
YBR074W	40.4462	-0.313336	0.566405	-0.553201	0.580126	0.999774
YBR072W	15.7809	-1.66533	0.915902	-1.81824	0.0690281	0.999774
YBR072C-A	11.1768	-0.729209	1.0453	-0.697611	0.485421	0.999774
YBR071W	10.2171	0.0185338	1.08459	0.0170883	0.986366	0.999774
YBR068C	46.8034	-0.165904	0.525087	-0.315955	0.752037	0.999774
YBR069C	34.4542	0.415834	0.592154	0.702239	0.48253	0.999774
YOL105C	14.7215	-0.590392	0.899026	-0.656701	0.511373	0.999774
YOL107W	14.1854	1.0919	0.90883	1.20143	0.229584	0.999774
YOL110W	60.0427	0.894443	0.473712	1.88816	0.0590048	0.999774
YOL111C	12.5482	0.377557	0.968755	0.389735	0.696733	0.999774
YOL112W	16.5484	0.196962	0.832282	0.236653	0.812926	0.999774
YOL113W	21.0299	0.106523	0.746365	0.142722	0.88651	0.999774
YOL114C	7.91323	0.1516	1.2738	0.119015	0.905264	0.999774
YIL091C	23.2645	-0.801716	0.719218	-1.11471	0.264977	0.999774
YOL057W	19.0154	-0.105691	0.776342	-0.136139	0.891711	0.999774
YPR114W	14.2933	-0.0923083	0.939526	-0.0982498	0.921734	0.999774
YDL092W	11.7348	-0.39639	1.00853	-0.393036	0.694293	0.999774
YLR348C	36.2126	0.286414	0.611411	0.468447	0.639465	0.999774
YIL005W	42.9961	-0.942541	0.575238	-1.63852	0.101313	0.999774
YOR269W	17.0089	0.947415	0.848807	1.11617	0.264348	0.999774
YOR270C	23.5174	0.808761	0.698761	1.15742	0.2471	0.999774
YLR047C	21.1221	0.580161	0.735736	0.788545	0.430378	0.999774
YDL160C	8.74957	0.381271	1.17141	0.32548	0.744818	0.999774
YNR021W	13.1808	0.275072	0.94161	0.292129	0.770188	0.999774
YNR019W	35.2651	-0.669822	0.604428	-1.10819	0.267779	0.999774
YNR027W	17.0297	0.222703	0.827215	0.26922	0.78776	0.999774
YNR026C	9.41913	-0.0915175	1.132	-0.0808456	0.935565	0.999774
YNR029C	19.4067	-0.300867	0.770987	-0.390236	0.696362	0.999774
YNR028W	13.1794	-0.0442212	0.942811	-0.0469036	0.96259	0.999774
YJR125C	13.7478	-0.342068	0.928103	-0.368567	0.71245	0.999774
YAL015C	24.8834	-1.00675	0.699657	-1.43892	0.150172	0.999774
YJR080C	10.7368	0.175069	1.04895	0.166899	0.867449	0.999774
YCR083W	9.1254	-1.09747	1.18473	-0.92635	0.354264	0.999774
YMR150C	9.33055	-0.077033	1.14787	-0.0671095	0.946495	0.999774
YPL180W	13.1306	0.369032	0.94844	0.389093	0.697207	0.999774
YPR115W	33.4203	-0.329711	0.610765	-0.539833	0.589312	0.999774
YPL036W	27.9533	-0.121468	0.658605	-0.184432	0.853674	0.999774
YLL013C	29.6084	-0.495295	0.637729	-0.776655	0.437362	0.999774
YKL079W	29.0708	0.227255	0.647005	0.351242	0.725407	0.999774
YKL077W	12.5909	1.39654	0.993007	1.40637	0.159614	0.999774
YKL074C	24.8942	0.415302	0.691631	0.600468	0.548194	0.999774
YKL072W	30.7198	0.50162	0.621499	0.807113	0.419602	0.999774
YKL071W	10.1543	0.17441	1.08002	0.161488	0.871709	0.999774
YPR118W	10.1647	-0.537605	1.11404	-0.482571	0.629401	0.999774
YDL214C	36.8402	-0.156681	0.580192	-0.27005	0.787122	0.999774
YDL080C	11.5928	2.04702	1.06753	1.91753	0.0551709	0.999774
YDL021W	12.2043	-0.111746	0.993168	-0.112515	0.910415	0.999774
YPR117W	66.5181	-0.636677	0.457932	-1.39033	0.164429	0.999774
YHR097C	21.0026	-0.171443	0.740123	-0.231641	0.816817	0.999774
YHR096C	32.164	-0.652806	0.618479	-1.0555	0.291195	0.999774
YHR091C	11.3285	2.54403	1.09274	2.32813	0.0199051	0.999774
YHR094C	21.9623	-0.542944	0.730424	-0.743327	0.457283	0.999774
YHR092C	11.6889	0.790162	1.0199	0.774741	0.438493	0.999774
YHR087W	10.6482	0.188188	1.05939	0.177639	0.859007	0.999774
YHR086W-A	11.8618	-0.292458	1.00383	-0.291343	0.770789	0.999774
YPR120C	12.3201	0.338925	0.995005	0.340627	0.733385	0.999774
YDL201W	18.9372	-0.490954	0.787366	-0.62354	0.53293	0.999774
YDL206W	13.6349	-0.11406	0.925675	-0.123218	0.901935	0.999774
YNL096C	7.99143	0.921929	1.23874	0.744246	0.456728	0.999774
YDL203C	9.11645	0.28154	1.1452	0.245844	0.805803	0.999774
YCL038C	15.3681	-0.355824	0.873307	-0.407445	0.683681	0.999774
YDL204W	17.195	0.343741	0.815139	0.421696	0.673247	0.999774
YKL127W	33.9744	0.522937	0.597122	0.875762	0.38116	0.999774
YKL129C	46.3727	0.605197	0.52473	1.15335	0.248768	0.999774
YKL133C	11.7244	0.200555	1.02946	0.194815	0.845538	0.999774
YKL132C	18.2971	0.417984	0.788673	0.529984	0.596123	0.999774
YKL135C	19.4573	1.53019	0.802457	1.90688	0.0565359	0.999774
YKL134C	20.5669	0.849774	0.760419	1.11751	0.263777	0.999774
YCR046C	9.52315	0.719537	1.12135	0.641667	0.521089	0.999774
YKL126W	12.8846	1.90955	0.980315	1.9479	0.0514274	0.999774
YCR048W	39.3205	-0.243675	0.57289	-0.425343	0.670587	0.999774
YBR205W	16.2428	-0.109081	0.858223	-0.127101	0.89886	0.999774
YNL101W	21.3429	-0.403108	0.760919	-0.529764	0.596276	0.999774
YKR036C	30.6954	0.585505	0.621129	0.942646	0.345862	0.999774
YPR089W	21.2027	-0.55418	0.742362	-0.74651	0.45536	0.999774
YJL147C	8.98949	0.172756	1.1568	0.14934	0.881286	0.999774
YPR091C	17.3951	-0.0729616	0.812527	-0.0897959	0.928449	0.999774
YGR286C	19.3902	0.997831	0.769722	1.29635	0.194854	0.999774
YGR284C	13.0126	-0.595801	0.959425	-0.620998	0.534601	0.999774
YGR283C	14.9679	0.603305	0.877483	0.68754	0.491743	0.999774
YGR282C	15.1207	0.752051	0.875843	0.85866	0.390528	0.999774
YGR281W	45.7616	0.408331	0.542069	0.753282	0.451281	0.999774
YGR279C	18.6167	0.855169	0.783811	1.09104	0.275255	0.999774
YHR030C	15.7719	-0.625711	0.879033	-0.711818	0.476577	0.999774
YHR029C	7.88741	-0.0338856	1.2456	-0.0272043	0.978297	0.999774
YJR074W	10.0916	0.329249	1.08866	0.302435	0.76232	0.999774
YJR075W	16.3788	-0.8036	0.864927	-0.929095	0.35284	0.999774
YJR076C	10.6586	-0.480643	1.06867	-0.449756	0.652887	0.999774
YGR288W	13.1565	0.475134	0.940465	0.505211	0.61341	0.999774
YGR287C	22.4103	0.150475	0.718485	0.209434	0.834109	0.999774
YCL045C	33.8832	-0.907317	0.616185	-1.47248	0.140893	0.999774
YLR337C	8.00686	1.86583	1.26686	1.4728	0.140804	0.999774
YLR332W	9.65762	-0.81007	1.14677	-0.706392	0.479944	0.999774
YLR329W	8.50965	0.593858	1.19058	0.498797	0.617922	0.999774
YLR330W	32.0553	-0.106752	0.620657	-0.171999	0.863438	0.999774
YLR327C	8.35974	1.26369	1.24059	1.01861	0.308387	0.999774
YLR328W	20.8423	0.428858	0.741739	0.578179	0.563143	0.999774
YOR124C	27.6506	0.00490424	0.657033	0.00746423	0.994044	0.999774
YNL316C	8.53403	0.288133	1.18815	0.242505	0.808389	0.999774
YOR126C	12.0515	-0.333809	1.02067	-0.327049	0.743631	0.999774
YNL268W	29.4664	0.519241	0.632247	0.821262	0.411497	0.999774
YOR127W	18.8308	0.682834	0.781162	0.874126	0.38205	0.999774
YOR129C	8.7008	0.964643	1.18367	0.814961	0.415094	0.999774
YOR132W	15.8132	0.0420508	0.856699	0.0490846	0.960852	0.999774
YOR237W	10.3788	-0.927427	1.09695	-0.845458	0.397855	0.999774
YCR011C	63.946	-0.106758	0.459605	-0.232282	0.816319	0.999774
YNL045W	30.4756	0.165065	0.635517	0.259733	0.79507	0.999774
YOR233W	23.6518	0.247905	0.700141	0.354078	0.72328	0.999774
YLL021W	27.2299	-0.328043	0.6578	-0.498698	0.617992	0.999774
YDL149W	16.623	-0.0500562	0.843285	-0.0593585	0.952667	0.999774
YOR231W	22.2575	0.0387238	0.717344	0.0539822	0.956949	0.999774
YGL236C	37.8663	-0.104791	0.589193	-0.177855	0.858837	0.999774
YGL235W	9.93879	0.0869602	1.09338	0.0795335	0.936608	0.999774
YGL238W	13.6836	-0.566493	0.934102	-0.606458	0.544211	0.999774
YGR170W	33.9604	0.415471	0.595624	0.697539	0.485466	0.999774
YGL234W	13.849	-0.369214	0.929036	-0.397417	0.69106	0.999774
YGL233W	8.93425	-1.86006	1.25827	-1.47827	0.139335	0.999774
YGR166W	9.19464	0.934204	1.17024	0.798301	0.424696	0.999774
YGL229C	33.6423	0.285631	0.60032	0.475798	0.634219	0.999774
YGR169C	19.7366	-0.173977	0.772871	-0.225105	0.821897	0.999774
YGR168C	9.85165	0.514154	1.09935	0.467691	0.640006	0.999774
YIL085C	36.5605	-0.261932	0.583701	-0.448743	0.653617	0.999774
YIL090W	11.3375	1.54399	1.05631	1.46168	0.143828	0.999774
YDR334W	29.0274	-0.344963	0.641077	-0.538099	0.590509	0.999774
YIL088C	19.7198	-0.927285	0.783052	-1.18419	0.236337	0.999774
YIL089W	9.97717	0.20244	1.10402	0.183366	0.854511	0.999774
YLR054C	23.8674	0.282634	0.697126	0.405427	0.685163	0.999774
YDR333C	17.6107	-0.0185121	0.806731	-0.022947	0.981693	0.999774
YIL079C	9.85021	0.100901	1.10238	0.09153	0.927071	0.999774
YIL082W-A	42.2505	-0.826317	0.563229	-1.46711	0.142347	0.999774
YDR409W	27.1184	-0.0488768	0.65574	-0.0745368	0.940583	0.999774
YDR410C	20.9191	0.530158	0.774865	0.684194	0.493853	0.999774
YPR010C	12.5955	-0.415905	0.979991	-0.424396	0.671277	0.999774
YPR009W	8.54298	-1.21463	1.23867	-0.980589	0.326796	0.999774
YPR011C	29.2982	0.173929	0.633282	0.274647	0.783588	0.999774
YNL288W	12.1415	0.0212926	0.984877	0.0216195	0.982751	0.999774
YDR400W	17.6889	0.346523	0.808063	0.428831	0.668046	0.999774
YDR402C	21.0424	0.0925521	0.737171	0.12555	0.900088	0.999774
YDR403W	22.718	0.623586	0.713533	0.873942	0.38215	0.999774
YDR405W	19.8124	1.56244	0.777932	2.00846	0.0445947	0.999774
YDR406W	122.589	0.245711	0.347227	0.707638	0.47917	0.999774
YDR407C	15.758	-0.956062	0.877813	-1.08914	0.276092	0.999774
YOR044W	9.29218	-0.212558	1.1389	-0.186635	0.851947	0.999774
YPR138C	35.1417	-0.346836	0.591874	-0.585996	0.557878	0.999774
YDR003W-A	8.15028	-1.40924	1.27992	-1.10104	0.27088	0.999774
YPL161C	9.94919	-0.663358	1.1308	-0.586627	0.557454	0.999774
YLR454W	50.6006	-0.210582	0.513882	-0.409787	0.681962	0.999774
YNR071C	16.5086	-0.13345	0.836194	-0.159592	0.873203	0.999774
YNL313C	10.6187	-1.15546	1.09736	-1.05294	0.292369	0.999774
YLR455W	15.862	-0.326046	0.857155	-0.380382	0.703662	0.999774
YLR228C	14.4253	0.95986	0.897932	1.06897	0.285085	0.999774
YNL295W	14.965	0.0639358	0.905385	0.0706172	0.943702	0.999774
YNL097C	10.8253	0.162163	1.04415	0.155306	0.87658	0.999774
YNL100W	8.8611	-0.453537	1.17508	-0.385962	0.699525	0.999774
YNL294C	19.6054	-1.02212	0.786563	-1.29948	0.193779	0.999774
YNL102W	13.2651	-0.775349	0.97326	-0.796652	0.425653	0.999774
YLR231C	18.9652	-0.0340576	0.787418	-0.0432522	0.9655	0.999774
YNL104C	49.916	0.472917	0.510116	0.927077	0.353887	0.999774
YNL103W	8.78435	-0.801259	1.23744	-0.647513	0.5173	0.999774
YIL151C	17.1796	-0.129547	0.818542	-0.158265	0.874248	0.999774
YIL152W	10.5854	0.334848	1.05538	0.317277	0.751033	0.999774
YIL169C	28.7387	-0.0717274	0.639966	-0.11208	0.91076	0.999774
YLR233C	19.2478	0.570725	0.76988	0.741317	0.458501	0.999774
YOR338W	23.8918	0.170271	0.695119	0.244952	0.806494	0.999774
YOR337W	28.436	0.0510562	0.641969	0.0795306	0.936611	0.999774
YOL055C	22.7373	-0.130359	0.714196	-0.182526	0.85517	0.999774
YIL158W	12.687	0.267805	0.972897	0.275266	0.783112	0.999774
YIL159W	46.9547	-0.204288	0.525095	-0.38905	0.697239	0.999774
YIL157C	11.8234	-0.407171	1.00542	-0.404977	0.685494	0.999774
YIL155C	42.8767	0.547396	0.541711	1.01049	0.312259	0.999774
YIL156W	39.3625	0.0713555	0.564024	0.126511	0.899327	0.999774
YIL153W	29.2709	-0.0200508	0.642422	-0.0312113	0.975101	0.999774
YNL289W	18.887	-0.409708	0.784802	-0.522053	0.601634	0.999774
YLR460C	13.0435	0.682037	0.947434	0.719878	0.4716	0.999774
YDR188W	10.7199	-1.18489	1.09369	-1.08339	0.278636	0.999774
YDR189W	9.25236	-0.914553	1.1642	-0.785563	0.432124	0.999774
YDR183W	8.77252	-0.439084	1.18493	-0.370557	0.710967	0.999774
YDR185C	11.2062	0.423447	1.04228	0.406269	0.684545	0.999774
YDR186C	34.5475	-0.275151	0.601836	-0.457185	0.647538	0.999774
YDR180W	18.1135	-0.679356	0.806902	-0.841931	0.399827	0.999774
YDR182W	9.55648	-0.77538	1.14039	-0.679923	0.496553	0.999774
YOL045W	19.1238	0.935842	0.826614	1.13214	0.257576	0.999774
YOR365C	25.3593	0.0345368	0.683957	0.0504956	0.959727	0.999774
YOR299W	26.9642	-0.313789	0.666606	-0.470727	0.637836	0.999774
YNL287W	13.1898	-0.614768	0.961222	-0.63957	0.522452	0.999774
YNL311C	18.523	0.11101	0.795699	0.139513	0.889045	0.999774
YOR357C	9.37037	0.483028	1.14666	0.421248	0.673574	0.999774
YOR356W	19.453	0.918218	0.77338	1.18728	0.235118	0.999774
YOR359W	11.4336	0.288738	1.02877	0.280663	0.778969	0.999774
YNL286W	11.7592	-0.675869	1.01507	-0.665833	0.505518	0.999774
YOR161C	31.952	-0.299476	0.627176	-0.4775	0.633006	0.999774
YOR360C	9.77058	-1.22596	1.1475	-1.06838	0.285351	0.999774
YOR343W-A	10.2659	-0.572149	1.08797	-0.525886	0.598967	0.999774
YOR254C	11.1538	-0.0216092	1.03864	-0.0208053	0.983401	0.999774
YML013W	7.83865	0.643404	1.25162	0.514059	0.607211	0.999774
YML012W	16.5344	-0.0418628	0.839217	-0.0498832	0.960215	0.999774
YML010W	13.835	-0.71202	0.931947	-0.764014	0.444859	0.999774
YML008C	10.3534	2.72619	1.15803	2.35417	0.0185642	0.999774
YEL038W	18.6679	-1.24576	0.829856	-1.50117	0.133311	0.999774
YEL037C	20.5486	0.0832233	0.744857	0.111731	0.911037	0.999774
YEL040W	30.6068	0.590428	0.621452	0.950079	0.342072	0.999774
YEL042W	16.623	-0.0500562	0.843285	-0.0593585	0.952667	0.999774
YEL041W	21.8766	-0.109069	0.736875	-0.148015	0.882331	0.999774
YEL043W	29.003	-0.239988	0.639417	-0.375323	0.707421	0.999774
YEL047C	19.6007	0.333794	0.772314	0.432201	0.665596	0.999774
YMR283C	13.3964	0.336535	0.933275	0.360596	0.718402	0.999774
YPL115C	19.558	-0.396433	0.769871	-0.514935	0.606598	0.999774
YMR276W	17.6387	0.416262	0.838932	0.496181	0.619767	0.999774
YMR275C	16.1019	-0.451484	0.852616	-0.529528	0.596439	0.999774
YMR280C	54.3881	-0.0813737	0.491613	-0.165524	0.868532	0.999774
YMR278W	20.8638	-0.0986089	0.763104	-0.129221	0.897183	0.999774
YMR279C	14.2955	0.35416	0.913299	0.387781	0.698178	0.999774
YER169W	30.7029	0.11357	0.621215	0.182819	0.85494	0.999774
YER170W	8.49422	-0.367089	1.20115	-0.305616	0.759897	0.999774
YER167W	31.7358	-0.416744	0.624864	-0.666935	0.504814	0.999774
YER168C	11.4425	-0.76218	1.05804	-0.720369	0.471298	0.999774
YER166W	62.6976	0.131409	0.462064	0.284396	0.776107	0.999774
YER163C	17.8337	-0.952723	0.822104	-1.15888	0.246504	0.999774
YER164W	45.3183	1.15795	0.534111	2.16799	0.0301595	0.999774
YPR184W	65.0517	0.0913271	0.455819	0.200358	0.8412	0.999774
YER171W	16.2378	-1.26086	0.876214	-1.43898	0.150155	0.999774
YER172C	23.5944	-0.671802	0.72911	-0.921401	0.356841	0.999774
YOR361C	8.89947	-0.298983	1.18219	-0.252907	0.80034	0.999774
YDL088C	10.7124	0.422399	1.05224	0.401429	0.688104	0.999774
YOR358W	15.4079	0.0187447	0.8665	0.0216327	0.982741	0.999774
YOR342C	11.4386	1.47601	1.03588	1.42489	0.15419	0.999774
YOR363C	24.2956	0.0105976	0.716489	0.014791	0.988199	0.999774
YBR041W	11.5849	0.139134	1.01655	0.136868	0.891135	0.999774
YBR038W	16.973	-0.968236	0.845561	-1.14508	0.252176	0.999774
YBR045C	16.1292	-0.0680121	0.872172	-0.0779801	0.937844	0.999774
YBR044C	10.5381	1.1899	1.06818	1.11396	0.265298	0.999774
YBR043C	19.9403	0.00635101	0.759415	0.00836303	0.993327	0.999774
YBR042C	9.46646	-1.40646	1.18459	-1.18729	0.235113	0.999774
YOR202W	21.6905	0.40219	0.724592	0.555057	0.578856	0.999774
YBR047W	11.903	0.515964	0.992105	0.52007	0.603015	0.999774
YBR046C	9.29074	-0.73638	1.16418	-0.632533	0.527038	0.999774
YCR051W	8.05418	0.730689	1.23311	0.592557	0.553478	0.999774
YML082W	32.9774	-0.310061	0.607161	-0.510674	0.60958	0.999774
YOR168W	13.0768	-0.358274	0.951878	-0.376387	0.706629	0.999774
YOL047C	11.7029	1.08856	1.00665	1.08137	0.279533	0.999774
YPL202C	12.7727	-0.435936	0.964761	-0.451859	0.651371	0.999774
YNR074C	10.2429	0.160727	1.07734	0.149188	0.881405	0.999774
YCR054C	8.21448	-0.912923	1.24382	-0.733965	0.46297	0.999774
YCL051W	22.7986	-0.407423	0.714987	-0.569832	0.568791	0.999774
YBR267W	9.30904	1.06506	1.14414	0.930886	0.351912	0.999774
YNL042W-B	11.4565	-0.342119	1.02254	-0.334577	0.737944	0.999774
YDL238C	23.7752	-0.161328	0.699923	-0.230495	0.817707	0.999774
YPL203W	26.3767	-1.03399	0.682826	-1.51428	0.129954	0.999774
YOL027C	9.17921	0.110423	1.15136	0.0959068	0.923595	0.999774
YIL075C	22.0161	-0.0710032	0.723059	-0.0981984	0.921775	0.999774
YPL246C	12.3312	-0.0226629	0.998625	-0.0226941	0.981894	0.999774
YOR292C	13.5065	-0.548251	0.940831	-0.58273	0.560075	0.999774
YDL115C	10.891	0.760187	1.06799	0.711795	0.476592	0.999774
YOR022C	16.3329	0.144516	0.838384	0.172375	0.863143	0.999774
YBR197C	33.0355	0.367757	0.604534	0.60833	0.542968	0.999774
YNR032W	19.5771	0.566789	0.823752	0.688058	0.491416	0.999774
YOR275C	11.2794	-0.319512	1.02959	-0.31033	0.75631	0.999774
YBR199W	17.1337	0.666048	0.829053	0.803383	0.421753	0.999774
YBR198C	9.49229	-1.16933	1.16167	-1.0066	0.314128	0.999774
YDL048C	52.3522	0.0531825	0.499047	0.106568	0.915132	0.999774
YPR122W	54.0176	-0.278151	0.500531	-0.555711	0.578408	0.999774
YNL193W	25.0928	-0.0391124	0.683518	-0.0572222	0.954368	0.999774
YBR235W	38.5355	0.699156	0.567855	1.23122	0.218239	0.999774
YNL192W	15.6737	-0.00779859	0.879398	-0.00886811	0.992924	0.999774
YCR106W	30.7467	-0.613661	0.640051	-0.958769	0.337675	0.999774
YML007C-A	8.07105	2.19145	1.2814	1.7102	0.0872288	0.999774
YCR105W	32.9103	-0.703195	0.622979	-1.12876	0.258998	0.999774
YLR055C	11.0366	-1.06031	1.11548	-0.950548	0.341834	0.999774
YGR055W	18.5098	0.016578	0.801627	0.0206804	0.983501	0.999774
YDR019C	20.5041	0.924961	0.779755	1.18622	0.235535	0.999774
YKL063C	9.29361	0.250382	1.14441	0.218787	0.826816	0.999774
YKL064W	38.5018	0.0874412	0.56687	0.154253	0.877411	0.999774
YKL065C	9.58878	1.37725	1.14083	1.20723	0.227342	0.999774
YKL068W	28.5146	1.51856	0.651329	2.33148	0.019728	0.999774
YKL069W	8.59823	0.576082	1.18511	0.486099	0.626897	0.999774
YNL191W	14.6408	1.00293	0.891406	1.12511	0.260544	0.999774
YKL062W	23.1336	0.357983	0.704306	0.508278	0.611258	0.999774
YJL118W	23.8932	0.341751	0.691676	0.494091	0.621242	0.999774
YPL241C	16.1521	-0.548895	0.864425	-0.634982	0.52544	0.999774
YNL254C	13.3964	0.336535	0.933275	0.360596	0.718402	0.999774
YDL243C	10.7597	-0.514174	1.06648	-0.482124	0.629718	0.999774
YMR093W	9.58087	-1.18164	1.16121	-1.01759	0.308871	0.999774
YLR086W	16.9242	-0.548456	0.832692	-0.658654	0.510118	0.999774
YOR165W	24.6115	-0.0614804	0.684623	-0.0898018	0.928445	0.999774
YBR299W	8.97406	-0.851789	1.18672	-0.717766	0.472901	0.999774
YMR092C	21.3591	0.114604	0.749735	0.152859	0.878509	0.999774
YOR207C	13.6349	-0.11406	0.925675	-0.123218	0.901935	0.999774
YDR027C	13.7095	-0.443487	0.945934	-0.468835	0.639188	0.999774
YKL192C	8.18258	1.30777	1.22906	1.06404	0.287309	0.999774
YDR006C	33.4856	0.927246	0.611943	1.51525	0.12971	0.999774
YHR119W	32.0679	-0.114869	0.611784	-0.187761	0.851064	0.999774
YHR120W	9.33343	0.79352	1.14438	0.693406	0.488055	0.999774
YHR123W	16.1661	-0.266916	0.847642	-0.314892	0.752844	0.999774
YHR124W	38.0029	-0.331365	0.580122	-0.571199	0.567865	0.999774
YHR126C	11.2808	0.0732186	1.02422	0.0714873	0.94301	0.999774
YHR128W	8.86757	1.60287	1.21423	1.32007	0.186811	0.999774
YLR174W	25.6943	0.667154	0.683705	0.975792	0.329168	0.999774
YMR164C	12.4316	-0.24787	0.988221	-0.250825	0.80195	0.999774
YDL167C	14.8994	-0.418575	0.945474	-0.442714	0.657972	0.999774
YHR186C	25.5404	-1.20986	0.703402	-1.72002	0.0854297	0.999774
YLR173W	46.6402	-0.0709619	0.534707	-0.132712	0.894421	0.999774
YHR183W	12.2929	-0.122692	0.982073	-0.124932	0.900577	0.999774
YLR170C	14.9267	-0.0160225	0.887316	-0.0180573	0.985593	0.999774
YLR168C	16.9691	0.662582	0.843034	0.78595	0.431897	0.999774
YKL140W	12.2957	0.552487	0.990146	0.557985	0.576855	0.999774
YHR184W	11.5222	0.275688	1.04044	0.264973	0.791031	0.999774
YKL142W	10.8024	0.775301	1.05664	0.73374	0.463107	0.999774
YCR024C	8.79082	1.39581	1.21021	1.15336	0.248763	0.999774
YHR182W	23.6622	-0.0338061	0.697065	-0.0484978	0.96132	0.999774
YMR167W	17.4349	0.237417	0.809125	0.293425	0.769197	0.999774
YHR178W	23.3197	-0.121937	0.704352	-0.173119	0.862558	0.999774
YOR099W	27.415	0.518892	0.652671	0.795029	0.426596	0.999774
YDR009W	49.5904	0.671092	0.510031	1.31579	0.188246	0.999774
YHR179W	9.4037	-1.15696	1.16657	-0.991764	0.321312	0.999774
YCR102C	17.861	-0.548968	0.8234	-0.666708	0.504959	0.999774
YPL158C	10.8881	0.0153553	1.0443	0.0147039	0.988268	0.999774
YCR098C	15.0794	0.150373	0.875023	0.17185	0.863555	0.999774
YCR100C	21.1364	-1.14084	0.790353	-1.44346	0.148891	0.999774
YHR001W	53.1253	-0.669931	0.503636	-1.33019	0.183456	0.999774
YHR001W-A	12.9359	-0.840849	0.998807	-0.841853	0.39987	0.999774
YHR002W	27.274	0.349863	0.670916	0.52147	0.602039	0.999774
YHL006C	61.2326	-0.323743	0.470734	-0.687742	0.491616	0.999774
YHL004W	12.261	1.24949	0.99027	1.26177	0.207031	0.999774
YHL003C	23.5199	-0.461397	0.707959	-0.651729	0.514576	0.999774
YHL002W	44.1226	-0.945193	0.573391	-1.64843	0.0992653	0.999774
YJR091C	31.0146	-0.37629	0.623349	-0.603659	0.546071	0.999774
YJR011C	9.73221	-1.44222	1.1649	-1.23807	0.215691	0.999774
YJR089W	11.2535	-0.462274	1.05549	-0.437972	0.661407	0.999774
YJR088C	13.9634	-0.264009	0.918933	-0.2873	0.773883	0.999774
YHR003C	29.5212	-0.329122	0.635538	-0.517864	0.604553	0.999774
YHR004C	17.3169	-0.492577	0.826477	-0.595997	0.551178	0.999774
YJR084W	13.5588	-0.121607	0.985661	-0.123376	0.901809	0.999774
YLR368W	10.0259	-0.371343	1.09841	-0.338073	0.735308	0.999774
YBR084W	24.3716	0.0156923	0.687433	0.0228274	0.981788	0.999774
YLR345W	27.221	0.0932067	0.655225	0.142252	0.886881	0.999774
YJR012C	10.8253	0.162163	1.04415	0.155306	0.87658	0.999774
YLR342W	18.1841	0.56751	0.794815	0.714015	0.475218	0.999774
YLR341W	13.7758	0.249597	0.944925	0.264145	0.791668	0.999774
YLR343W	22.0072	0.415959	0.725974	0.572967	0.566667	0.999774
YOR097C	8.68537	0.0889578	1.1779	0.0755226	0.939799	0.999774
YOR098C	9.10102	-0.686126	1.1659	-0.588493	0.556201	0.999774
YHL008C	63.1182	-1.10955	0.477186	-2.32519	0.020062	0.999774
YHL007C	71.4239	-0.294319	0.438555	-0.671111	0.50215	0.999774
YOR093C	30.2718	0.0546745	0.625201	0.0874511	0.930313	0.999774
YJL149W	27.9924	-0.00485623	0.660887	-0.00734805	0.994137	0.999774
YHL010C	20.1663	-0.298146	0.757899	-0.393385	0.694035	0.999774
YHL014C	19.2812	-0.126358	0.778552	-0.162298	0.871071	0.999774
YHL012W	19.4311	-0.461742	0.773548	-0.596914	0.550564	0.999774
YOR172W	15.2537	-0.453994	0.885161	-0.512895	0.608025	0.999774
YCR036W	15.8236	-0.412463	0.862619	-0.478152	0.632542	0.999774
YOR271C	9.39475	0.203343	1.1361	0.178984	0.857951	0.999774
YDR104C	32.8275	-0.117314	0.606961	-0.193281	0.846739	0.999774
YOR164C	15.4951	-0.277141	0.866767	-0.319742	0.749164	0.999774
YGL248W	10.1439	0.787892	1.12362	0.701208	0.483173	0.999774
YGL249W	32.0051	-0.0636148	0.612734	-0.103821	0.917311	0.999774
YGL246C	8.68393	-0.424286	1.20142	-0.353153	0.723974	0.999774
YGL244W	9.20503	0.265959	1.14118	0.233056	0.815718	0.999774
YGL245W	14.0121	-0.729594	0.933966	-0.781178	0.434698	0.999774
YGR180C	11.7044	1.42814	1.02595	1.39202	0.163917	0.999774
YGL243W	10.3441	0.119441	1.08844	0.109736	0.912619	0.999774
YGR178C	22.8578	-1.09988	0.735955	-1.49449	0.135048	0.999774
YGR179C	8.16715	0.395298	1.21963	0.324113	0.745852	0.999774
YGR177C	44.057	0.708091	0.537278	1.31792	0.187529	0.999774
YGR174C	8.38125	-0.00171522	1.20828	-0.00141955	0.998867	0.999774
YIL095W	24.0675	-0.0172265	0.693546	-0.0248382	0.980184	0.999774
YGR173W	13.8888	0.0428675	0.923213	0.046433	0.962965	0.999774
YGR021W	25.7932	0.421823	0.668172	0.631308	0.527839	0.999774
YLR045C	18.6012	0.451997	0.783237	0.577088	0.56388	0.999774
YLR044C	35.0395	0.63836	0.591857	1.07857	0.280779	0.999774
YGR012W	16.1815	0.249871	0.841548	0.296919	0.766529	0.999774
YGR013W	21.6492	-0.0339951	0.727728	-0.046714	0.962741	0.999774
YGR014W	31.6802	0.330101	0.631166	0.523002	0.600973	0.999774
YGR015C	16.3225	0.533726	0.859718	0.620816	0.534721	0.999774
YGR016W	9.82727	0.773723	1.10056	0.703025	0.48204	0.999774
YGR019W	42.9492	0.320403	0.575018	0.557205	0.577387	0.999774
YDL211C	8.07713	-0.100192	1.24914	-0.0802088	0.936071	0.999774
YDR399W	15.8545	0.623867	0.850889	0.733194	0.46344	0.999774
YDR395W	27.9009	-0.320846	0.650797	-0.493005	0.622009	0.999774
YDR391C	14.1273	-0.413347	0.931906	-0.44355	0.657368	0.999774
YDR389W	13.5707	-0.32334	0.932155	-0.346873	0.728686	0.999774
YOR273C	25.2661	0.919686	0.676642	1.35919	0.174086	0.999774
YNL284C-B	24.8748	1.06335	0.682998	1.55688	0.119499	0.999774
YJR048W	10.6267	1.17337	1.07312	1.09342	0.27421	0.999774
YNL106C	42.0429	-0.199322	0.557195	-0.357724	0.72055	0.999774
YPL011C	14.0003	-0.504869	0.929336	-0.543258	0.586952	0.999774
YNL112W	16.5706	-0.39198	0.907487	-0.43194	0.665785	0.999774
YNL108C	10.6084	-0.337744	1.0672	-0.316476	0.751641	0.999774
YNL116W	16.6614	0.022883	0.831386	0.0275239	0.978042	0.999774
YNL117W	32.6503	-0.109151	0.607358	-0.179714	0.857377	0.999774
YNL115C	21.1296	-0.117945	0.739886	-0.15941	0.873346	0.999774
YJL187C	24.0933	0.0442124	0.690658	0.0640149	0.948958	0.999774
YJL186W	24.0011	-0.428755	0.715479	-0.599255	0.549003	0.999774
YJL185C	11.4705	0.0244132	1.01817	0.0239776	0.98087	0.999774
YIL142W	16.6689	-1.05439	0.855332	-1.23273	0.217676	0.999774
YIL140W	24.2292	-0.391274	0.694172	-0.563657	0.572988	0.999774
YIL146C	14.275	-1.66458	0.964903	-1.72513	0.0845041	0.999774
YIL145C	11.3554	-0.310186	1.07051	-0.289754	0.772005	0.999774
YIL144W	12.3918	-0.765412	1.00266	-0.763381	0.445236	0.999774
YIL143C	17.3245	-1.81196	0.879936	-2.0592	0.0394753	0.999774
YIL150C	13.0614	-1.16848	0.981967	-1.18994	0.234071	0.999774
YIL149C	46.2751	-0.869098	0.545884	-1.59209	0.111364	0.999774
YIL147C	12.1275	-0.324721	0.994542	-0.326503	0.744044	0.999774
YDR172W	8.82128	-1.27712	1.21518	-1.05097	0.293274	0.999774
YDR171W	14.8639	0.0915096	0.882223	0.103726	0.917387	0.999774
YDR176W	15.2527	1.68543	0.931061	1.81022	0.0702611	0.999774
YIR004W	13.6682	-1.41298	0.97141	-1.45456	0.14579	0.999774
YOL019W	15.5733	0.160598	0.866086	0.18543	0.852892	0.999774
YDR179W-A	9.87316	-0.672755	1.1282	-0.59631	0.550968	0.999774
YDR179C	7.87198	-1.34275	1.30217	-1.03116	0.302464	0.999774
YNL297C	12.3033	-0.755405	0.998703	-0.756386	0.449418	0.999774
YNL298W	14.0003	-0.504869	0.929336	-0.543258	0.586952	0.999774
YBR278W	10.0761	-0.524845	1.10692	-0.474149	0.635394	0.999774
YOL020W	24.6385	1.54199	1.27257	1.21171	0.225623	0.999774
YOR092W	17.8312	0.818154	0.822835	0.994311	0.320071	0.999774
YPR125W	12.5712	-0.175208	0.982315	-0.178362	0.858439	0.999774
YJL201W	21.7622	-0.173151	0.726754	-0.238253	0.811685	0.999774
YPR127W	16.7485	-0.249845	0.831302	-0.300546	0.76376	0.999774
YJL209W	22.6552	0.690989	0.710377	0.972708	0.330699	0.999774
YJL208C	17.3915	-0.786308	0.859501	-0.914842	0.360274	0.999774
YJL212C	32.694	-0.841054	0.625093	-1.34549	0.178468	0.999774
YJL210W	22.5329	-0.390512	0.730396	-0.534658	0.592886	0.999774
YJL204C	8.94824	-1.07134	1.19601	-0.895763	0.370379	0.999774
YJL207C	47.1408	-0.469327	0.526099	-0.89209	0.372345	0.999774
YJL206C	27.3059	-0.323815	0.670912	-0.482648	0.629345	0.999774
YPL240C	33.6778	0.0730623	0.603898	0.120985	0.903703	0.999774
YLR143W	9.69279	2.18653	1.18786	1.84072	0.0656626	0.999774
YPR190C	14.3532	-0.91089	0.920473	-0.989589	0.322375	0.999774
YDL216C	13.051	-0.483604	0.959194	-0.504177	0.614137	0.999774
YDL078C	13.5233	0.406153	0.926005	0.438608	0.660946	0.999774
YML016C	35.8579	-0.899803	0.614938	-1.46324	0.143401	0.999774
YML017W	10.7228	-0.202468	1.06326	-0.190422	0.848978	0.999774
YML018C	18.2573	0.133496	0.790513	0.168873	0.865897	0.999774
YML019W	10.0016	-0.0744368	1.09832	-0.0677732	0.945966	0.999774
YML020W	29.5316	-0.594695	0.64356	-0.92407	0.35545	0.999774
YML023C	8.04915	-1.37232	1.30961	-1.04789	0.294691	0.999774
YEL052W	14.9482	-0.87185	0.93281	-0.934649	0.349969	0.999774
YEL050C	10.1328	1.21305	1.13856	1.06542	0.286687	0.999774
YPR023C	14.7369	0.0209744	0.886374	0.0236632	0.981121	0.999774
YEL056W	23.8254	-0.221356	0.715475	-0.309383	0.75703	0.999774
YEL057C	11.6308	-1.32304	1.05046	-1.25948	0.207857	0.999774
YEL055C	10.9996	-0.707171	1.05596	-0.669697	0.503051	0.999774
YMR293C	16.7256	0.180338	0.830053	0.217261	0.828005	0.999774
YDL076C	10.6084	-0.337744	1.0672	-0.316476	0.751641	0.999774
YMR285C	19.1115	-1.0757	0.797468	-1.34889	0.177372	0.999774
YMR284W	16.5972	-0.141352	0.834049	-0.169477	0.865421	0.999774
YMR287C	18.8566	0.756196	0.77879	0.970988	0.331554	0.999774
YMR289W	17.6107	-0.0185121	0.806731	-0.022947	0.981693	0.999774
YMR288W	8.03732	-0.883006	1.27147	-0.694478	0.487382	0.999774
YMR291W	19.4347	0.12242	0.794946	0.153998	0.877612	0.999774
YER158C	18.5474	-0.0410068	0.799985	-0.0512595	0.959119	0.999774
YER154W	10.7751	0.279474	1.06423	0.262608	0.792853	0.999774
YER157W	17.1825	0.36237	0.836515	0.43319	0.664877	0.999774
YER156C	15.4736	0.452795	0.879358	0.514915	0.606612	0.999774
YPL008W	14.4084	0.158469	0.898401	0.17639	0.859988	0.999774
YER162C	18.6206	-0.536324	0.818394	-0.655337	0.512251	0.999774
YAL062W	82.5225	-0.441091	0.41307	-1.06784	0.285594	0.999774
YJL103C	18.3075	0.0620195	0.800834	0.0774437	0.938271	0.999774
YPL006W	45.6439	-0.72658	0.54513	-1.33286	0.182579	0.999774
YAL067C	16.533	-0.313977	0.83809	-0.374634	0.707933	0.999774
YAL067W-A	8.40564	-0.351817	1.20892	-0.291017	0.771038	0.999774
YNL279W	26.3617	0.275078	0.665355	0.413431	0.679291	0.999774
YMR267W	13.5463	-0.104326	0.931256	-0.112027	0.910802	0.999774
YML125C	13.6194	-0.811572	0.943112	-0.860525	0.3895	0.999774
YML126C	9.92336	-0.847327	1.11837	-0.757642	0.448665	0.999774
YML131W	11.0513	-0.397646	1.06893	-0.372004	0.70989	0.999774
YMR265C	17.0193	0.593721	0.820056	0.724001	0.469065	0.999774
YML127W	12.574	0.488668	0.965292	0.506238	0.612689	0.999774
YML128C	20.0017	-0.297558	0.781524	-0.380741	0.703395	0.999774
YML130C	12.2287	-0.355523	0.991364	-0.35862	0.719879	0.999774
YBR053C	15.1408	-0.242978	0.899193	-0.270218	0.786993	0.999774
YBR054W	14.6484	0.0301396	0.889699	0.0338762	0.972976	0.999774
YBR055C	16.5315	-0.607704	0.847864	-0.716747	0.47353	0.999774
YBR056W	9.28322	0.915978	1.14527	0.799794	0.42383	0.999774
YBR049C	16.7715	-0.735876	0.843102	-0.872819	0.382762	0.999774
YBR050C	19.5595	-0.160528	0.767527	-0.209149	0.834332	0.999774
YBR052C	9.26923	0.534884	1.14046	0.469008	0.639064	0.999774
YBR057C	9.20503	0.265959	1.14118	0.233056	0.815718	0.999774
YFL046W	25.1491	-1.02089	0.701897	-1.45448	0.145814	0.999774
YFL047W	23.1479	-1.30163	0.757348	-1.71867	0.0856745	0.999774
YOR324C	23.2527	-0.66022	0.716498	-0.921453	0.356814	0.999774
YFL054C	37.6941	0.289859	0.598026	0.484694	0.627894	0.999774
YFL055W	23.7458	-0.758562	0.725271	-1.0459	0.295607	0.999774
YFL052W	28.9861	-0.739862	0.6478	-1.14211	0.253407	0.999774
YFL053W	20.2674	-0.317104	0.758009	-0.418338	0.6757	0.999774
YFL050C	25.1785	-0.406422	0.681982	-0.595942	0.551214	0.999774
YFL051C	13.9006	-0.143033	0.92907	-0.153953	0.877647	0.999774
YFL048C	12.9882	-0.348486	0.954222	-0.365205	0.714958	0.999774
YFL049W	15.7978	-0.517659	0.86372	-0.599336	0.548949	0.999774
YIL065C	13.0385	-0.465464	0.967443	-0.481128	0.630425	0.999774
YIL066C	27.0771	-0.433564	0.662668	-0.65427	0.512938	0.999774
YOR290C	9.74908	0.14436	1.12185	0.12868	0.897611	0.999774
YDL104C	14.4985	0.431131	0.897155	0.480553	0.630834	0.999774
YIL067C	30.9274	-0.222354	0.622944	-0.356941	0.721136	0.999774
YOR213C	8.01437	0.0988547	1.23492	0.0800497	0.936198	0.999774
YLR411W	12.0913	0.129968	1.01891	0.127557	0.8985	0.999774
YOR176W	9.82223	-0.814186	1.16138	-0.701051	0.483271	0.999774
YIL068C	18.8332	-1.04622	0.804239	-1.30088	0.193298	0.999774
YOR326W	17.8352	-0.646185	0.814179	-0.793664	0.427391	0.999774
YIL061C	9.97357	-1.03623	1.15097	-0.900309	0.367956	0.999774
YDL086W	38.7262	-0.179901	0.567345	-0.317092	0.751174	0.999774
YOR295W	9.96318	-0.200547	1.09653	-0.182893	0.854882	0.999774
YBR163W	12.2764	1.86673	1.0212	1.82797	0.0675536	0.999774
YPR062W	13.8518	0.260952	0.91965	0.283752	0.776601	0.999774
YIL064W	18.1791	-0.240817	0.801344	-0.300517	0.763783	0.999774
YPR158C-C	12.2559	0.129988	0.991671	0.13108	0.895712	0.999774
YOR175C	16.183	0.499775	0.846259	0.59057	0.554809	0.999774
YDR092W	9.12684	-0.496424	1.18161	-0.420125	0.674394	0.999774
YJL107C	23.9022	-0.113959	0.695314	-0.163896	0.869813	0.999774
YLR028C	50.5651	-0.0607755	0.50692	-0.119892	0.904569	0.999774
YBR183W	10.0776	-0.0622393	1.13136	-0.0550129	0.956128	0.999774
YBR184W	9.88859	0.217184	1.12709	0.192694	0.847198	0.999774
YBR182C	9.73869	0.789819	1.10832	0.71263	0.476075	0.999774
YNR048W	11.5695	-0.635471	1.03592	-0.613438	0.539587	0.999774
YNR047W	29.891	-0.052058	0.634476	-0.0820488	0.934608	0.999774
YOR178C	23.5543	0.686132	0.718518	0.954926	0.339615	0.999774
YOR328W	38.4207	-0.32205	0.572227	-0.562801	0.57357	0.999774
YPL030W	24.2063	-0.0788119	0.693313	-0.113674	0.909496	0.999774
YLR032W	20.5604	-0.040621	0.771883	-0.0526259	0.95803	0.999774
YDL074C	11.1524	-0.430399	1.03671	-0.415161	0.678024	0.999774
YAL063C	25.1889	-0.72938	0.693451	-1.05181	0.292886	0.999774
YOR100C	15.8301	0.783803	0.852768	0.919128	0.358029	0.999774
YMR109W	33.4422	0.492991	0.600517	0.820945	0.411677	0.999774
YPL229W	10.2813	0.270606	1.07594	0.251507	0.801422	0.999774
YMR108W	17.4016	0.964303	0.818381	1.1783	0.238675	0.999774
YDL144C	16.5255	0.59919	0.833153	0.719184	0.472028	0.999774
YOR329C	9.66945	-1.19396	1.16511	-1.02477	0.305473	0.999774
YLL038C	15.5335	-0.19336	0.869646	-0.222344	0.824046	0.999774
YMR110C	19.3335	0.143751	0.770981	0.186452	0.85209	0.999774
YAL026C	16.2134	-1.00606	0.865968	-1.16178	0.245325	0.999774
YPL204W	9.98756	-0.512188	1.10455	-0.463709	0.642857	0.999774
YLR443W	14.0097	1.39644	0.921831	1.51485	0.12981	0.999774
YML050W	9.54609	0.0222855	1.13227	0.0196821	0.984297	0.999774
YCL025C	64.9552	-0.290964	0.499614	-0.582377	0.560313	0.999774
YAL023C	40.6173	0.174446	0.554269	0.314732	0.752965	0.999774
YBR281C	20.6985	-0.214086	0.748623	-0.285974	0.774898	0.999774
YCL024W	49.34	-0.725983	0.526507	-1.37887	0.167936	0.999774
YCR063W	10.8741	-0.373622	1.05469	-0.354247	0.723153	0.999774
YOR059C	16.9167	0.388202	0.822763	0.471827	0.63705	0.999774
YJR111C	15.98	0.431433	0.858315	0.502651	0.61521	0.999774
YLL040C	69.582	-0.010741	0.442487	-0.0242741	0.980634	0.999774
YPL026C	13.8673	0.810986	0.917762	0.883656	0.376882	0.999774
YHR115C	14.2417	-0.3095	0.907396	-0.341086	0.733039	0.999774
YHR114W	24.94	-0.143992	0.682437	-0.210996	0.83289	0.999774
YHR113W	19.4738	0.284332	0.783093	0.363089	0.716539	0.999774
YHR112C	20.2061	-0.013605	0.753469	-0.0180565	0.985594	0.999774
YHR109W	12.6228	0.0622636	0.971645	0.0640806	0.948906	0.999774
YGR066C	7.96704	1.23739	1.24589	0.993178	0.320623	0.999774
YOR211C	19.2399	-0.698478	0.783582	-0.891391	0.37272	0.999774
YDR018C	17.5723	-0.0881246	0.813451	-0.108334	0.913731	0.999774
YHR117W	25.1785	-0.406422	0.681982	-0.595942	0.551214	0.999774
YHR116W	15.7748	-0.033811	0.855389	-0.0395271	0.96847	0.999774
YDL188C	17.4977	0.14731	0.810722	0.181702	0.855817	0.999774
YOR242C	18.1931	-0.0116773	0.793256	-0.0147208	0.988255	0.999774
YCL030C	40.1245	-0.777028	0.568471	-1.36687	0.171665	0.999774
YDL183C	10.8895	0.395426	1.04169	0.379599	0.704243	0.999774
YDL182W	36.6874	-0.229741	0.584731	-0.3929	0.694393	0.999774
YLR153C	9.6605	0.159054	1.11559	0.142574	0.886627	0.999774
YLR151C	8.0298	1.04156	1.249	0.833919	0.404327	0.999774
YLR152C	10.0658	0.188252	1.08874	0.172909	0.862723	0.999774
YLR149C	16.0965	0.884801	1.61069	0.54933	0.582779	0.999774
YLL039C	24.5692	0.887632	0.695408	1.27642	0.201808	0.999774
YLR148W	17.9223	-0.959298	0.820127	-1.16969	0.242124	0.999774
YLR146C	8.68681	0.558315	1.18885	0.469627	0.638621	0.999774
YJL110C	13.4548	-0.8079	1.00093	-0.807154	0.419578	0.999774
YPR162C	8.83671	-0.110975	1.17058	-0.0948036	0.924471	0.999774
YDR026C	15.7121	0.0689488	0.861041	0.0800761	0.936177	0.999774
YCL029C	36.7925	-1.11794	0.596758	-1.87335	0.0610201	0.999774
YLR373C	13.4577	-0.0944199	0.940429	-0.100401	0.920026	0.999774
YOR034C-A	9.21759	0.235158	1.18907	0.197767	0.843227	0.999774
YOR335C	14.176	-0.894135	0.933208	-0.95813	0.337997	0.999774
YDR078C	15.952	-0.0507277	0.858292	-0.0591032	0.95287	0.999774
YOR243C	8.16715	0.395298	1.21963	0.324113	0.745852	0.999774
YHR011W	8.67786	1.71901	1.20539	1.42611	0.153837	0.999774
YOR166C	13.812	-0.133336	0.924649	-0.144201	0.885342	0.999774
YCR071C	9.22046	1.08336	1.14434	0.946711	0.343786	0.999774
YJL080C	15.1576	0.56007	0.885548	0.632455	0.527089	0.999774
YHR007C	10.0991	-1.50701	1.14467	-1.31655	0.18799	0.999774
YHR006W	24.1406	-0.386058	0.694796	-0.555642	0.578455	0.999774
YCR061W	63.5795	-0.743384	0.473486	-1.57002	0.11641	0.999774
YHR009C	25.8635	-0.226514	0.673829	-0.336159	0.736751	0.999774
YHR008C	10.4509	1.59242	1.09593	1.45303	0.146215	0.999774
YHR007C-A	45.7928	-0.0222091	0.530047	-0.0419002	0.966578	0.999774
YOR184W	11.0226	-1.6653	1.1139	-1.49502	0.13491	0.999774
YER019W	19.1761	1.16973	0.778273	1.50298	0.132844	0.999774
YLL041C	17.9134	-0.219325	0.802734	-0.273223	0.784682	0.999774
YOR205C	26.1128	0.734854	0.665571	1.1041	0.269552	0.999774
YKR013W	13.4746	0.78499	0.931866	0.842385	0.399572	0.999774
YKR010C	29.1992	0.398541	0.641671	0.621099	0.534535	0.999774
YKR011C	14.9848	1.3602	0.889139	1.52979	0.126069	0.999774
YKL029C	147.025	-0.0220355	0.315593	-0.0698226	0.944335	0.999774
YKR015C	15.8788	0.461593	0.850634	0.542646	0.587373	0.999774
YKR016W	17.7301	0.849197	0.803743	1.05655	0.290716	0.999774
YKL034W	36.9625	0.501347	0.576256	0.870008	0.384296	0.999774
YKL033W-A	10.2982	1.37888	1.0844	1.27157	0.203526	0.999774
YKL033W	22.4949	1.20402	0.720667	1.67071	0.0947798	0.999774
YKL040C	8.98198	1.7528	1.19855	1.46244	0.143621	0.999774
YKL039W	33.3744	0.110106	0.622277	0.176941	0.859555	0.999774
YKL038W	50.1925	1.04596	0.516299	2.02587	0.042778	0.999774
YKL037W	30.09	0.808206	0.63178	1.27925	0.200809	0.999774
YHL020C	11.2639	-1.26592	1.06449	-1.18923	0.23435	0.999774
YHL021C	26.8734	-0.590047	0.671109	-0.879211	0.379287	0.999774
YHL022C	8.7969	-0.824453	1.19383	-0.690594	0.489821	0.999774
YHL023C	44.4213	-0.313093	0.543119	-0.576472	0.564296	0.999774
YHL016C	47.8732	-0.604794	0.524788	-1.15245	0.249135	0.999774
YHL017W	18.0507	-0.575766	0.807385	-0.713124	0.475769	0.999774
YHL019C	15.9595	-1.227	0.885641	-1.38544	0.165919	0.999774
YPL220W	9.16234	-1.61626	1.23147	-1.31246	0.189365	0.999774
YOR206W	9.5963	-0.119628	1.11961	-0.106848	0.91491	0.999774
YPL017C	34.1275	-0.482469	0.64166	-0.751908	0.452106	0.999774
YAL019W	21.6722	-0.379083	0.735191	-0.515625	0.606116	0.999774
YGL210W	11.2593	1.01789	1.09756	0.927416	0.35371	0.999774
YGL209W	11.0011	-0.262176	1.04113	-0.251818	0.801182	0.999774
YGL219C	11.0151	0.110309	1.04469	0.105589	0.915908	0.999774
YGL216W	35.5947	0.481285	0.586474	0.820641	0.411851	0.999774
YGR188C	10.9265	0.123282	1.06263	0.116016	0.90764	0.999774
YGR191W	9.72326	-0.0061355	1.10766	-0.00553914	0.99558	0.999774
YGR189C	11.5501	0.902072	1.01973	0.88462	0.376362	0.999774
YGL208W	27.1109	0.496827	0.654133	0.75952	0.447542	0.999774
YCR021C	26.8551	-1.47445	0.693166	-2.12712	0.0334104	0.999774
YLR077W	23.5558	0.850188	0.706106	1.20405	0.22857	0.999774
YLR073C	14.0519	-0.273332	0.921603	-0.296583	0.766785	0.999774
YHR078W	11.4167	-0.927404	1.04305	-0.889124	0.373936	0.999774
YGR031W	69.4704	0.092826	0.442663	0.209699	0.833903	0.999774
YGR028W	13.5707	-0.32334	0.932155	-0.346873	0.728686	0.999774
YMR192W	14.6986	-0.0615373	0.896672	-0.0686286	0.945285	0.999774
YLR410W	46.4186	0.322015	0.528125	0.609732	0.542039	0.999774
YGR026W	7.96704	1.23739	1.24589	0.993178	0.320623	0.999774
YGR023W	13.8902	0.340367	0.913063	0.372775	0.709316	0.999774
YLL048C	42.3388	0.141409	0.551075	0.256606	0.797483	0.999774
YDR380W	19.2952	0.08386	0.768771	0.109083	0.913136	0.999774
YDR386W	17.9517	-0.148188	0.808635	-0.183257	0.854597	0.999774
YDR383C	10.2967	0.998302	1.08896	0.916752	0.359273	0.999774
YDR384C	26.0561	0.0888974	0.666555	0.133368	0.893902	0.999774
YOR264W	12.611	0.255149	0.980138	0.26032	0.794617	0.999774
YOR208W	9.92193	-1.48434	1.15636	-1.28363	0.199271	0.999774
YDR387C	20.0045	0.138128	0.756009	0.182706	0.855029	0.999774
YNL146W	20.2032	-0.465139	0.763349	-0.60934	0.542299	0.999774
YHR084W	19.7248	-0.0409176	0.764021	-0.0535556	0.957289	0.999774
YPR051W	13.9698	1.04887	0.915629	1.14552	0.251995	0.999774
YCR081W	36.5658	-0.991589	0.599522	-1.65397	0.0981343	0.999774
YAL034W-A	10.0105	-1.49574	1.14854	-1.3023	0.192813	0.999774
YNL082W	12.3431	-0.237167	0.983589	-0.241124	0.809459	0.999774
YNL079C	13.4039	-0.918503	0.95514	-0.961643	0.336229	0.999774
YNL078W	19.662	0.0411316	0.761808	0.0539921	0.956941	0.999774
YAL035W	8.51716	-1.48619	1.25598	-1.18329	0.236693	0.999774
YNL076W	11.4565	-0.342119	1.02254	-0.334577	0.737944	0.999774
YIL136W	12.1519	-0.589647	1.00349	-0.587597	0.556803	0.999774
[truncated: 1,715 more rows]

## Sheet: 1734
gene	baseMean	log2FoldChange	lfcSE	stat	pvalue	padj
YKR001C	29.5783	5.02466	0.872959	5.75589	8.61857e-09	4.83157e-05
YHR164C	204.017	0.96166	0.252758	3.80467	0.000141991	0.398001
YKR002W	14.1042	3.85269	1.05587	3.64881	0.000263454	0.492308
YKR019C	26.5827	2.72806	0.774884	3.5206	0.000430569	0.574597
YKL021C	14.6791	3.43671	1.00034	3.43554	0.000591374	0.574597
YKR054C	95.4502	1.26999	0.370808	3.42492	0.000614981	0.574597
YKR041W	49.7434	1.72008	0.524197	3.28137	0.00103305	0.723908
YOR305W	5.74753	6.77184	2.04077	3.31828	0.000905746	0.723908
YKR022C	10.3749	4.05105	1.25123	3.23766	0.00120514	0.750669
YKR024C	21.5468	2.49335	0.806372	3.09206	0.00198775	0.933354
YKR008W	17.7899	2.76245	0.891271	3.09945	0.0019388	0.933354
YKL002W	14.1716	3.13361	1.01394	3.09054	0.0019979	0.933354
YNL333W	3.77287	-1.9187	2.29629	-0.835564	0.4034	0.999757
YBR257W	5.97757	0.237317	1.4604	0.162502	0.870911	0.999757
YPL141C	19.824	-0.295209	0.843555	-0.349959	0.72637	0.999757
YBR258C	3.95726	-0.801635	2.00571	-0.399677	0.689394	0.999757
YPR030W	22.431	0.130712	0.797747	0.163851	0.869848	0.999757
YPL068C	4.5381	-0.292185	1.83586	-0.159155	0.873547	0.999757
YMR323W	5.78523	0.760636	1.46728	0.518399	0.60418	0.999757
YOL030W	14.5919	-0.203989	0.9534	-0.213959	0.830579	0.999757
YBR255C-A	3.55873	1.69186	2.07521	0.815272	0.414916	0.999757
YDL054C	20.0599	0.121309	0.824033	0.147214	0.882963	0.999757
YKL224C	1.33431	-0.00456159	4.00537	-0.00113887	0.999091	0.999757
YJR161C	2.09954	1.74778	3.17528	0.550432	0.582023	0.999757
YIL123W	15.3156	0.617313	0.915797	0.674072	0.500266	0.999757
YJR156C	4.26065	-0.136842	1.85229	-0.0738773	0.941108	0.999757
YJR160C	0.574959	-1.82025	6.03499	-0.301617	0.762944	0.999757
YJR153W	7.873	0.389715	1.2861	0.303022	0.761873	0.999757
YJR152W	9.60169	1.02924	1.12571	0.914302	0.360558	0.999757
YJR155W	9.05647	-0.278188	1.20039	-0.231748	0.816734	0.999757
YJR154W	8.22379	-0.0773342	1.24437	-0.0621472	0.950446	0.999757
YBL068W	7.68654	1.10317	1.24559	0.885658	0.375802	0.999757
YBL069W	18.3371	-0.129388	0.863032	-0.149923	0.880825	0.999757
YBL066C	24.7568	0.0412799	0.755176	0.0546626	0.956407	0.999757
YBL067C	3.50718	0.270665	2.09906	0.128946	0.8974	0.999757
YBL072C	3.12457	-0.34497	2.29557	-0.150277	0.880546	0.999757
YBL074C	7.38522	-0.223555	1.31722	-0.169718	0.865232	0.999757
YBL071W-A	1.03091	-2.67297	5.64058	-0.473881	0.635585	0.999757
YBR252W	2.66861	-0.00244165	2.54659	-0.000958791	0.999235	0.999757
YBL063W	26.5232	-0.461573	0.7476	-0.617406	0.536967	0.999757
YBL064C	9.04264	0.0560987	1.17502	0.0477428	0.961921	0.999757
YOL031C	13.1307	0.224206	1.00426	0.223256	0.823336	0.999757
YBR253W	0.892189	-2.45098	5.54855	-0.441733	0.658682	0.999757
YDL051W	10.359	-0.894432	1.21094	-0.738627	0.460133	0.999757
YIL130W	26.3468	0.329461	0.725012	0.454421	0.649526	0.999757
YKR039W	20.3235	1.502	0.812187	1.84933	0.0644107	0.999757
YPL171C	21.1265	-0.582753	0.848295	-0.686971	0.492101	0.999757
YIL129C	43.0365	0.424663	0.580528	0.731511	0.464467	0.999757
YLR098C	6.04296	0.643606	1.43154	0.449589	0.653007	0.999757
YOR320C	6.69921	-1.01987	1.46273	-0.697237	0.485655	0.999757
YOR014W	11.1225	0.408377	1.0673	0.382627	0.701996	0.999757
YLR099C	10.8924	-0.0580435	1.08294	-0.0535979	0.957256	0.999757
YPL070W	10.5752	0.00392689	1.09644	0.00358149	0.997142	0.999757
YOR012W	2.34343	2.62615	2.78464	0.943085	0.345638	0.999757
YOL032W	7.63499	0.446286	1.26098	0.35392	0.723399	0.999757
YDL052C	8.54102	-0.155022	1.22192	-0.126868	0.899045	0.999757
YMR001C-A	6.95105	-1.77422	1.55811	-1.1387	0.254828	0.999757
YCL057W	29.1603	-0.637157	0.734686	-0.867251	0.385804	0.999757
YPR108W	6.69921	-1.01987	1.46273	-0.697237	0.485655	0.999757
YMR001C	4.96638	0.670907	1.63533	0.410258	0.681617	0.999757
YCL057C-A	3.82441	0.0797515	1.97189	0.0404442	0.967739	0.999757
YCL058W-A	5.02588	0.647552	1.61013	0.402174	0.687556	0.999757
YKL090W	20.4764	0.0851855	0.832657	0.102306	0.918514	0.999757
YKL091C	8.34279	-0.100864	1.22932	-0.0820482	0.934608	0.999757
YKL088W	6.1758	0.155638	1.43032	0.108813	0.913351	0.999757
YKL089W	0.515457	-1.67883	6.04385	-0.277775	0.781185	0.999757
YKL086W	31.4757	-0.162901	0.677859	-0.240317	0.810085	0.999757
YKL087C	7.96813	-1.31982	1.37823	-0.95762	0.338254	0.999757
YKL084W	17.336	-0.961082	0.930895	-1.03243	0.301872	0.999757
YKL085W	8.2992	-2.06719	1.47715	-1.39944	0.161681	0.999757
YKL081W	7.3316	0.170193	1.31701	0.129227	0.897178	0.999757
YKL082C	5.15872	0.0590104	1.60646	0.0367331	0.970698	0.999757
YOL033W	2.35138	0.27699	2.74174	0.101027	0.919529	0.999757
YCL059C	3.87596	1.39908	1.92179	0.728009	0.466608	0.999757
YOR104W	3.45564	-1.7769	2.40108	-0.740043	0.459274	0.999757
YKR030W	6.78051	1.92456	1.35948	1.41566	0.156874	0.999757
YKR029C	18.1825	1.95504	0.887958	2.20173	0.0276846	0.999757
YPL271W	1.45919	1.62419	3.72683	0.43581	0.662975	0.999757
YNL196C	14.931	1.02063	0.914463	1.1161	0.264379	0.999757
YML001W	4.78406	-2.29167	2.0798	-1.10187	0.270518	0.999757
YPL270W	16.1106	-0.0262491	0.905891	-0.028976	0.976884	0.999757
YML002W	23.4322	-0.62877	0.822073	-0.764859	0.444355	0.999757
YPR007C	11.0252	-0.358827	1.09254	-0.328433	0.742585	0.999757
YDL213C	7.4506	0.142418	1.28956	0.110439	0.912061	0.999757
YNL301C	15.7716	0.538737	0.899221	0.599115	0.549096	0.999757
YOR373W	10.7457	0.487358	1.07245	0.454432	0.649518	0.999757
YMR300C	1.53253	-0.31036	3.70718	-0.0837187	0.93328	0.999757
YPL228W	5.29156	-0.58112	1.63016	-0.35648	0.721481	0.999757
YPL072W	9.15576	-0.282054	1.2154	-0.232066	0.816487	0.999757
YPL207W	21.3209	0.252184	0.798532	0.315809	0.752147	0.999757
YOL026C	1.45919	1.62419	3.72683	0.43581	0.662975	0.999757
YDR032C	7.20671	-0.184213	1.33954	-0.13752	0.89062	0.999757
YNL219C	6.20347	-0.891826	1.5525	-0.574446	0.565666	0.999757
YJL141C	22.2743	-0.247363	0.836388	-0.295752	0.76742	0.999757
YDL218W	9.23498	-0.309131	1.18371	-0.261155	0.793973	0.999757
YIL014C-A	1.91515	0.756928	3.41167	0.221865	0.824419	0.999757
YIL014W	9.6771	-0.0866741	1.1456	-0.0756583	0.939691	0.999757
YIL013C	29.2869	0.182812	0.692746	0.263895	0.791861	0.999757
YIL011W	3.45564	-1.7769	2.40108	-0.740043	0.459274	0.999757
YIL010W	10.7596	0.228746	1.07784	0.212227	0.83193	0.999757
YIL009C-A	10.0061	0.388123	1.13647	0.341515	0.732716	0.999757
YIL009W	28.1529	-0.127316	0.713032	-0.178556	0.858286	0.999757
YIL008W	2.03415	0.623659	2.99757	0.208055	0.835186	0.999757
YIL007C	12.2644	0.615607	1.01169	0.608495	0.542859	0.999757
YIL006W	15.9996	-0.391036	0.925368	-0.422574	0.672606	0.999757
YLR097C	5.32927	1.00379	1.57106	0.638926	0.522871	0.999757
YCL021W-A	4.39349	-0.981666	1.9026	-0.515959	0.605883	0.999757
YPL214C	12.4111	0.147375	1.01089	0.145787	0.884089	0.999757
YGL075C	4.45887	-0.239482	1.79033	-0.133764	0.893589	0.999757
YGL073W	11.5407	-0.451493	1.077	-0.419213	0.675061	0.999757
YGL071W	10.4285	0.559862	1.08394	0.516508	0.6055	0.999757
YGL070C	2.42472	-1.1657	2.84933	-0.409112	0.682458	0.999757
YGL068W	1.45919	1.62419	3.72683	0.43581	0.662975	0.999757
YGL067W	6.99465	0.295289	1.33143	0.221784	0.824482	0.999757
YGL066W	8.0394	-0.40635	1.28235	-0.316878	0.751336	0.999757
YGL065C	8.71952	-0.188427	1.21309	-0.155327	0.876563	0.999757
YGL064C	3.05123	0.624101	2.2694	0.275007	0.783311	0.999757
YHR147C	0.257728	-0.771587	6.11444	-0.126191	0.899581	0.999757
YHR148W	5.47595	-0.0670615	1.5534	-0.0431708	0.965565	0.999757
YLL051C	13.7136	-0.297441	0.995002	-0.298935	0.76499	0.999757
YLL052C	6.05886	-1.54606	1.634	-0.946181	0.344057	0.999757
YLL053C	6.68537	-0.470097	1.41174	-0.332992	0.739141	0.999757
YLL054C	7.3316	0.170193	1.31701	0.129227	0.897178	0.999757
YJL036W	10.2818	1.10411	1.09843	1.00517	0.314814	0.999757
YJL037W	9.99433	-0.153162	1.13359	-0.135113	0.892523	0.999757
YJL034W	6.67742	0.402429	1.35851	0.296228	0.767056	0.999757
YJL035C	1.01708	0.623191	4.65075	0.133998	0.893404	0.999757
YJL041W	3.88392	0.0524691	1.94476	0.0269797	0.978476	0.999757
YJL042W	53.0661	-0.463983	0.537226	-0.863664	0.387772	0.999757
YJL038C	2.03415	0.623659	2.99757	0.208055	0.835186	0.999757
YJL039C	13.1843	0.0110058	0.988154	0.0111377	0.991114	0.999757
YDR011W	30.4151	0.369522	0.67594	0.546678	0.5846	0.999757
YLR263W	5.60084	0.380749	1.50903	0.252314	0.800798	0.999757
YJL031C	0.832687	-2.35848	5.74915	-0.410231	0.681636	0.999757
YJL033W	11.3186	1.03654	1.04502	0.991887	0.321253	0.999757
YLR266C	17.9365	-0.815576	0.913566	-0.892739	0.371997	0.999757
YLR265C	1.73076	-0.558975	3.77465	-0.148086	0.882275	0.999757
YPR155C	17.1872	0.00871715	0.881391	0.00989022	0.992109	0.999757
YOL028C	7.78167	-0.340091	1.29541	-0.262534	0.79291	0.999757
YPL146C	2.10749	-0.918012	3.08423	-0.297647	0.765973	0.999757
YMR169C	13.2953	0.410462	0.971346	0.422571	0.672609	0.999757
YJR127C	67.107	-0.204088	0.464572	-0.439302	0.660443	0.999757
YMR170C	9.61552	0.752766	1.15043	0.654334	0.512897	0.999757
YBR238C	4.98817	-1.22441	1.79982	-0.680298	0.496316	0.999757
YJR019C	14.6296	0.374598	0.932878	0.40155	0.688015	0.999757
YGL098W	0.515457	-1.67883	6.04385	-0.277775	0.781185	0.999757
YGL099W	3.4418	-0.532459	2.16613	-0.245811	0.805828	0.999757
YJR021C	10.1787	0.0960344	1.11477	0.0861476	0.931349	0.999757
YGL103W	2.86684	-0.165893	2.41417	-0.0687162	0.945216	0.999757
YGL104C	8.13868	-0.410937	1.29663	-0.316926	0.7513	0.999757
YGL100W	4.20703	0.52122	1.85363	0.281189	0.778566	0.999757
YGL101W	4.0901	-2.04763	2.21168	-0.925823	0.354538	0.999757
YGL107C	4.12781	0.595622	1.85802	0.320569	0.748537	0.999757
YGL108C	1.34814	-3.05737	4.46875	-0.684165	0.493871	0.999757
YGL105W	3.49335	1.03966	2.05905	0.504922	0.613613	0.999757
YBR237W	10.1171	0.877571	1.10775	0.79221	0.428238	0.999757
YPL074W	13.561	-0.046359	0.977532	-0.0474245	0.962175	0.999757
YDR057W	12.0126	0.876134	1.01	0.867461	0.385689	0.999757
YOL029C	6.86769	1.07652	1.33117	0.808702	0.418687	0.999757
YOR386W	6.2353	0.139163	1.42479	0.0976723	0.922192	0.999757
YOR384W	20.0599	0.121309	0.824033	0.147214	0.882963	0.999757
YOR385W	10.0379	0.914783	1.09891	0.832442	0.405159	0.999757
YOR382W	1.71692	1.08011	3.35381	0.322053	0.747412	0.999757
YOR383C	3.4418	-0.532459	2.16613	-0.245811	0.805828	0.999757
YOR381W	11.7766	0.263791	1.03239	0.255516	0.798324	0.999757
YOR381W-A	0.957574	0.7601	5.23538	0.145185	0.884565	0.999757
YOR378W	14.5324	-0.197339	0.957423	-0.206115	0.836701	0.999757
YOR380W	19.7942	0.424275	0.822349	0.51593	0.605903	0.999757
YGR250C	18.918	-0.0417834	0.848633	-0.0492361	0.960731	0.999757
YGR251W	4.42913	3.01588	1.8508	1.6295	0.103207	0.999757
YGR252W	5.09922	0.078996	1.62567	0.0485929	0.961244	0.999757
YGR253C	5.14488	0.602165	1.59988	0.376381	0.706634	0.999757
YGR246C	6.41969	0.500789	1.38988	0.360311	0.718615	0.999757
YGR247W	4.76815	0.789373	1.66286	0.474709	0.634995	0.999757
YGR248W	7.68654	1.10317	1.24559	0.885658	0.375802	0.999757
YGR249W	3.00556	-0.278544	2.42847	-0.1147	0.908683	0.999757
YJR104C	7.92246	-1.99544	1.49712	-1.33285	0.182582	0.999757
YJR103W	38.8312	0.196299	0.601208	0.326507	0.74404	0.999757
YJR106W	12.6768	-0.368349	1.02416	-0.35966	0.719102	0.999757
YJR024C	7.76783	0.0524242	1.2656	0.0414224	0.966959	0.999757
YGR254W	14.7466	-1.19177	1.01743	-1.17135	0.241458	0.999757
YGR255C	8.93159	-0.608946	1.22789	-0.495928	0.619945	0.999757
YJR110W	25.768	-0.0429015	0.750781	-0.0571426	0.954432	0.999757
YJR109C	31.3747	0.123307	0.671681	0.18358	0.854343	0.999757
YOR287C	1.91515	0.756928	3.41167	0.221865	0.824419	0.999757
YDR366C	4.0901	-2.04763	2.21168	-0.925823	0.354538	0.999757
YOR289W	7.13337	0.238354	1.31819	0.180819	0.856509	0.999757
YOR236W	5.91218	-0.216483	1.51736	-0.14267	0.886551	0.999757
YOR063W	2.35138	0.27699	2.74174	0.101027	0.919529	0.999757
YOR284W	5.93191	-0.242822	1.49914	-0.161974	0.871326	0.999757
YOR285W	6.56048	-0.974177	1.48262	-0.657066	0.511139	0.999757
YDR367W	1.90927	-0.724676	3.26222	-0.222142	0.824203	0.999757
YOR212W	15.6823	-0.351899	0.932596	-0.377332	0.705927	0.999757
YMR271C	5.17256	-0.545744	1.6687	-0.327048	0.743632	0.999757
YOR291W	24.1265	-0.670655	0.807879	-0.830143	0.406458	0.999757
YOR037W	6.04296	0.643606	1.43154	0.449589	0.653007	0.999757
YPL066W	13.1566	0.442223	0.985789	0.448598	0.653722	0.999757
YPL065W	3.11073	0.58461	2.26479	0.25813	0.796307	0.999757
YDL055C	1.84181	2.32668	3.46578	0.67133	0.50201	0.999757
YCL044C	10.7419	-0.594724	1.17925	-0.504325	0.614033	0.999757
YOR177C	7.29389	-1.18239	1.45818	-0.810867	0.417442	0.999757
YMR190C	14.0785	-0.822872	1.01094	-0.813964	0.415665	0.999757
YOR180C	1.65154	-0.44081	3.57506	-0.123301	0.901868	0.999757
YPR156C	13.3548	0.402338	0.971921	0.413961	0.678902	0.999757
YOR179C	9.3955	-1.61087	1.3177	-1.22249	0.221523	0.999757
YGR111W	6.8836	-0.532511	1.3894	-0.383268	0.701521	0.999757
YGR112W	1.40765	-3.11463	4.33266	-0.718872	0.47222	0.999757
YOL054W	7.17108	1.32687	1.29773	1.02246	0.306565	0.999757
YGR104C	3.43384	1.07833	2.08979	0.515998	0.605856	0.999757
YGR106C	4.79583	-0.404124	1.79019	-0.225744	0.821401	0.999757
YGR108W	5.62851	-0.712713	1.63696	-0.435389	0.66328	0.999757
YGR109C	6.11629	0.172358	1.44332	0.119418	0.904945	0.999757
YGR109W-B	23.3056	-0.327116	0.789004	-0.414593	0.67844	0.999757
YGR109W-A	2.16699	-0.961913	3.03084	-0.317376	0.750959	0.999757
YGR110W	2.93222	0.706788	2.38377	0.2965	0.766848	0.999757
YDR319C	5.66829	-0.705827	1.57956	-0.446849	0.654984	0.999757
YDR318W	5.66622	0.802084	1.50698	0.532247	0.594555	0.999757
YDR317W	5.09922	0.078996	1.62567	0.0485929	0.961244	0.999757
YIL026C	18.1171	0.364374	0.863876	0.421789	0.673179	0.999757
YOR209C	4.70277	0.27924	1.70954	0.163342	0.870249	0.999757
YDR316W	10.4959	0.0299545	1.10501	0.0271079	0.978374	0.999757
YDR315C	2.54961	0.0807542	2.60275	0.0310265	0.975248	0.999757
YDR314C	7.19287	0.223931	1.3092	0.171045	0.864188	0.999757
YIL035C	25.538	0.817702	0.73783	1.10825	0.267753	0.999757
YIL034C	25.877	-0.668476	0.763247	-0.875832	0.381121	0.999757
YIL037C	11.1065	-1.40201	1.18252	-1.18561	0.235777	0.999757
YIL036W	20.2049	0.255133	0.8536	0.29889	0.765024	0.999757
YIL030C	28.2581	-0.0279989	0.712764	-0.0392821	0.968665	0.999757
YIL029C	1.40765	-3.11463	4.33266	-0.718872	0.47222	0.999757
YIL033C	8.1584	-0.429227	1.26446	-0.339456	0.734267	0.999757
YDR320C	7.56165	0.817869	1.26061	0.648788	0.516475	0.999757
YNL125C	9.94278	-0.8044	1.18064	-0.681326	0.495665	0.999757
YML045W-A	0.892189	-2.45098	5.54855	-0.441733	0.658682	0.999757
YML041C	7.90656	0.00478083	1.27084	0.00376194	0.996998	0.999757
YML042W	25.4743	0.40335	0.749442	0.538201	0.590438	0.999757
YNL121C	7.63706	-0.721421	1.35022	-0.534299	0.593135	0.999757
YNL122C	2.2265	-1.00453	3.00684	-0.334081	0.738318	0.999757
YML037C	0.957574	0.7601	5.23538	0.145185	0.884565	0.999757
YML038C	3.26329	-0.444521	2.32877	-0.190882	0.848618	0.999757
YML035C	13.323	-0.0167233	0.994785	-0.016811	0.986587	0.999757
YDR370C	6.05679	0.189504	1.46473	0.129378	0.897059	0.999757
YNL118C	7.06003	0.64089	1.30878	0.489685	0.624357	0.999757
YNL119W	7.81938	0.725563	1.2391	0.585556	0.558174	0.999757
YPR048W	5.14488	0.602165	1.59988	0.376381	0.706634	0.999757
YPL088W	6.90332	-0.552453	1.43728	-0.384375	0.700701	0.999757
YPR046W	1.33431	-0.00456159	4.00537	-0.00113887	0.999091	0.999757
YDR371W	10.5831	-0.581183	1.1283	-0.515097	0.606485	0.999757
YNL305C	5.35106	-0.598326	1.62229	-0.368816	0.712265	0.999757
YMR188C	2.98377	2.4707	2.5086	0.984889	0.324679	0.999757
YPL152W	2.23238	0.378604	2.86272	0.132253	0.894784	0.999757
YPL199C	1.90131	2.21015	3.16724	0.697817	0.485292	0.999757
YOL025W	9.26854	-0.687862	1.25336	-0.548813	0.583134	0.999757
YNL051W	5.8468	-0.753811	1.60714	-0.469038	0.639043	0.999757
YHR131C	15.4385	-0.531076	0.953263	-0.557113	0.57745	0.999757
YAR031W	9.60376	0.226959	1.14012	0.199065	0.842212	0.999757
YDL222C	20.1215	-0.319365	0.839837	-0.380271	0.703744	0.999757
YPL232W	10.5216	0.26869	1.12464	0.238913	0.811173	0.999757
YPR080W	1.14992	-2.82045	4.82416	-0.584652	0.558782	0.999757
YOR036W	2.35138	0.27699	2.74174	0.101027	0.919529	0.999757
YIL103W	14.3065	0.244191	0.954126	0.255931	0.798004	0.999757
YOR313C	2.43061	0.173649	2.96276	0.0586105	0.953262	0.999757
YDR499W	5.01793	1.67065	1.62426	1.02856	0.303687	0.999757
YMR076C	16.422	-0.244224	0.913786	-0.267266	0.789264	0.999757
YMR075W	5.56313	-1.41224	1.70775	-0.826958	0.408261	0.999757
YDR494W	3.50718	0.270665	2.09906	0.128946	0.8974	0.999757
YDR493W	3.17612	1.3256	2.19977	0.602607	0.54677	0.999757
YDR492W	8.67974	-0.195677	1.23838	-0.15801	0.874449	0.999757
YDR490C	26.7612	-0.47581	0.742895	-0.640481	0.52186	0.999757
YDR498C	2.80145	-1.40867	2.65537	-0.530499	0.595766	0.999757
YDR497C	22.6531	-0.7135	0.820755	-0.869321	0.384672	0.999757
YDR496C	5.80702	-0.760705	1.56054	-0.487463	0.625931	0.999757
YDR495C	7.82733	0.0396406	1.26357	0.0313718	0.974973	0.999757
YFR025C	30.3853	0.80181	0.67134	1.19434	0.232344	0.999757
YFR024C-A	14.1598	0.647987	0.970259	0.667849	0.50423	0.999757
YFR027W	3.75903	-0.698281	2.06078	-0.338843	0.734728	0.999757
YFR026C	13.5987	0.557864	0.968839	0.575807	0.564746	0.999757
YFR029W	30.9167	0.418372	0.670053	0.624386	0.532374	0.999757
YFR028C	7.1057	1.00455	1.33004	0.755275	0.450084	0.999757
YFR031C	21.8682	0.44677	0.794742	0.562157	0.574009	0.999757
YFR030W	20.7954	-0.394184	0.83987	-0.469339	0.638827	0.999757
YFR032C	9.66119	1.01636	1.11645	0.910356	0.362635	0.999757
YFR031C-A	1.59203	-0.377001	3.60589	-0.104551	0.916732	0.999757
YOL004W	21.0552	0.53365	0.797461	0.669187	0.503376	0.999757
YMR186W	5.92602	-0.790961	1.54369	-0.512384	0.608382	0.999757
YMR185W	11.2612	0.371178	1.05037	0.35338	0.723804	0.999757
YPL254W	2.74784	-0.0909332	2.54688	-0.0357038	0.971519	0.999757
YER053C	14.6376	-0.00361997	0.945745	-0.00382764	0.996946	0.999757
YER052C	11.9074	0.672502	1.0399	0.6467	0.517826	0.999757
YER051W	12.7858	0.703915	0.984978	0.71465	0.474825	0.999757
YER050C	1.01708	0.623191	4.65075	0.133998	0.893404	0.999757
YER056C	10.6862	0.497585	1.07261	0.463899	0.64272	0.999757
YER055C	10.1331	-0.188623	1.12773	-0.167258	0.867167	0.999757
YER054C	18.3568	-0.137925	0.867722	-0.15895	0.873708	0.999757
YBR200W-A	0.257728	-0.771587	6.11444	-0.126191	0.899581	0.999757
YNL036W	1.71692	1.08011	3.35381	0.322053	0.747412	0.999757
YER057C	3.83237	-1.94035	2.27312	-0.85361	0.393321	0.999757
YER056C-A	0.699846	1.67103	5.94183	0.281231	0.778533	0.999757
YLR007W	5.71189	1.2512	1.48182	0.84437	0.398463	0.999757
YNL199C	9.1478	0.347013	1.18385	0.293123	0.769428	0.999757
YPR078C	21.7966	0.193729	0.813773	0.238063	0.811832	0.999757
YOR043W	11.4774	-1.93103	1.24903	-1.54603	0.122098	0.999757
YMR216C	10.6783	0.979454	1.06602	0.918795	0.358203	0.999757
YAL010C	4.58376	0.325967	1.7238	0.189098	0.850016	0.999757
YMR294W	4.20115	-0.112936	1.85568	-0.0608596	0.951471	0.999757
YMR008C	5.53545	-0.0850828	1.54955	-0.0549081	0.956212	0.999757
YOR197W	9.97461	-0.137808	1.18371	-0.11642	0.90732	0.999757
YBR200W	2.21854	1.58674	2.84438	0.557852	0.576945	0.999757
YDR268W	4.7166	-0.355825	1.7346	-0.205134	0.837467	0.999757
YDR267C	2.86684	-0.165893	2.41417	-0.0687162	0.945216	0.999757
YDR266C	4.46683	-2.18387	2.13243	-1.02412	0.305776	0.999757
YDR265W	3.68569	0.17916	2.02675	0.0883976	0.929561	0.999757
YDR264C	15.4485	0.424881	0.915967	0.46386	0.642748	0.999757
YDR263C	5.67418	-0.149103	1.52994	-0.0974571	0.922363	0.999757
YDR262W	3.4418	-0.532459	2.16613	-0.245811	0.805828	0.999757
YDR261W-A	0.892189	-2.45098	5.54855	-0.441733	0.658682	0.999757
YDL002C	6.16784	1.00297	1.41205	0.710292	0.477523	0.999757
YOR039W	3.39025	-4.38272	2.84885	-1.53842	0.123946	0.999757
YBR106W	2.16699	-0.961913	3.03084	-0.317376	0.750959	0.999757
YBR107C	6.10246	0.624945	1.42483	0.438609	0.660945	0.999757
YBR104W	12.8809	-0.168569	1.01672	-0.165797	0.868316	0.999757
YBR105C	13.2597	-0.997232	1.04823	-0.951346	0.341429	0.999757
YBR102C	13.3033	-0.00406336	0.985253	-0.00412418	0.996709	0.999757
YBR103W	3.87596	1.39908	1.92179	0.728009	0.466608	0.999757
YBR098W	14.2768	-0.850937	1.00208	-0.849168	0.395788	0.999757
YBR101C	2.29984	-3.82011	3.36777	-1.13431	0.256663	0.999757
YBR096W	1.52665	-3.22233	4.21041	-0.765326	0.444078	0.999757
YBR097W	8.33691	-0.462845	1.26578	-0.365661	0.714618	0.999757
YMR029C	6.60408	0.829409	1.3664	0.607001	0.54385	0.999757
YDL241W	2.2265	-1.00453	3.00684	-0.334081	0.738318	0.999757
YBR201C-A	3.17612	1.3256	2.19977	0.602607	0.54677	0.999757
YAR023C	9.7961	-0.106873	1.15118	-0.0928381	0.926032	0.999757
YPR084W	4.90099	0.175597	1.65425	0.106149	0.915464	0.999757
YMR257C	4.7166	-0.355825	1.7346	-0.205134	0.837467	0.999757
YOR040W	12.5439	-0.10477	1.0159	-0.10313	0.917859	0.999757
YCR044C	3.19791	-1.64655	2.48493	-0.662614	0.507578	0.999757
YDL159W-A	1.2748	0.0819289	4.09616	0.0200014	0.984042	0.999757
YDL240W	15.2164	0.618265	0.927566	0.666545	0.505063	0.999757
YHR133C	6.49891	0.451772	1.3955	0.323735	0.746139	0.999757
YOR193W	5.59495	-0.103052	1.55373	-0.0663258	0.947118	0.999757
YPR083W	16.9156	0.212919	0.889376	0.239402	0.810794	0.999757
YMR262W	7.89272	0.364691	1.24341	0.2933	0.769293	0.999757
YBL106C	19.9748	-0.0027944	0.838383	-0.00333309	0.997341	0.999757
YOR312C	3.56669	0.239342	2.05467	0.116487	0.907267	0.999757
YHR108W	10.5018	0.285954	1.08732	0.26299	0.792558	0.999757
YBR029C	3.3823	-0.504259	2.1965	-0.229574	0.818423	0.999757
YBR030W	4.48067	-4.78702	2.59697	-1.84331	0.065284	0.999757
YBR026C	3.19202	-4.2912	2.91959	-1.46979	0.141617	0.999757
YBR028C	5.4244	-1.36084	1.70918	-0.796194	0.425919	0.999757
YBR034C	18.3371	-0.129388	0.863032	-0.149923	0.880825	0.999757
YBR035C	5.28568	-1.30743	1.74332	-0.749967	0.453275	0.999757
YBR031W	1.9826	-3.6081	3.62352	-0.995745	0.319374	0.999757
YBR033W	23.1271	-0.314588	0.787673	-0.39939	0.689606	0.999757
YPR082C	3.62619	0.208994	2.03143	0.10288	0.918058	0.999757
YBR036C	8.7472	-0.985868	1.2778	-0.771535	0.44039	0.999757
YBR037C	3.51514	-1.80101	2.36778	-0.760633	0.446876	0.999757
YDR033W	11.2155	0.12995	1.06971	0.121482	0.903309	0.999757
YOL155C	14.576	-1.8618	1.10825	-1.67996	0.0929659	0.999757
YGR136W	11.0311	-0.0910369	1.09006	-0.0835152	0.933442	0.999757
YOL156W	5.80702	-0.760705	1.56054	-0.487463	0.625931	0.999757
YOL157C	7.23854	0.593238	1.31906	0.449743	0.652896	0.999757
YOL151W	3.12457	-0.34497	2.29557	-0.150277	0.880546	0.999757
YOL152W	27.9388	-0.814808	0.744063	-1.09508	0.273482	0.999757
YGL202W	11.5487	-1.08012	1.12549	-0.959685	0.337214	0.999757
YDL160C-A	1.65154	-0.44081	3.57506	-0.123301	0.901868	0.999757
YOL148C	3.24946	0.454123	2.19363	0.207019	0.835995	0.999757
YDL234C	10.9519	-0.0670298	1.08034	-0.0620452	0.950527	0.999757
YGL198W	4.39937	-0.217281	1.8091	-0.120104	0.9044	0.999757
YMR237W	20.2028	0.646456	0.824684	0.783884	0.433108	0.999757
YGL200C	5.00201	-2.37961	2.09606	-1.13528	0.256259	0.999757
YPL135W	8.15252	-0.84608	1.30909	-0.646309	0.518079	0.999757
YGL205W	22.0744	0.17708	0.793272	0.223227	0.823359	0.999757
YGR143W	23.1132	-0.179007	0.784556	-0.228164	0.819519	0.999757
YKR028W	40.2527	1.35049	0.582624	2.31794	0.0204524	0.999757
YMR195W	6.18168	0.571756	1.44933	0.394495	0.693215	0.999757
YGL203C	21.5074	-0.0244602	0.809251	-0.0302257	0.975887	0.999757
YKR027W	32.6713	1.48548	0.660644	2.24853	0.0245424	0.999757
YMR044W	11.3404	0.344475	1.06292	0.324085	0.745873	0.999757
YGL204C	0.515457	-1.67883	6.04385	-0.277775	0.781185	0.999757
YMR238W	10.5613	0.276019	1.08554	0.254268	0.799288	0.999757
YKR026C	17.6273	2.06913	0.862712	2.3984	0.0164669	0.999757
YDR079C-A	0.699846	1.67103	5.94183	0.281231	0.778533	0.999757
YMR222C	2.35934	-3.85328	3.33963	-1.1538	0.248581	0.999757
YKL201C	31.8919	-0.195205	0.696695	-0.280188	0.779334	0.999757
YKL198C	143.667	-0.42794	0.310151	-1.37978	0.167655	0.999757
YKL197C	35.7603	0.163207	0.629634	0.25921	0.795473	0.999757
YKL196C	2.80145	-1.40867	2.65537	-0.530499	0.595766	0.999757
YKL195W	0.832687	-2.35848	5.74915	-0.410231	0.681636	0.999757
YKL194C	12.7065	0.731252	0.993202	0.736256	0.461575	0.999757
YKL193C	5.20438	0.579429	1.61435	0.358923	0.719652	0.999757
YJL081C	2.66861	-0.00244165	2.54659	-0.000958791	0.999235	0.999757
YKL191W	7.89479	-0.785088	1.32831	-0.591043	0.554492	0.999757
YPL125W	16.7153	0.712325	0.877403	0.811856	0.416874	0.999757
YDL174C	17.2962	-0.963275	0.932819	-1.03265	0.301768	0.999757
YIL050W	8.47563	-0.502484	1.24638	-0.403155	0.686835	0.999757
YKR023W	16.0134	1.13844	0.888871	1.28077	0.200274	0.999757
YBL079W	18.5156	-0.145643	0.870013	-0.167404	0.867052	0.999757
YBL081W	5.10129	-2.39194	2.03594	-1.17486	0.240051	0.999757
YBL080C	10.8786	0.20961	1.07471	0.195039	0.845363	0.999757
YBL084C	6.2353	0.139163	1.42479	0.0976723	0.922192	0.999757
YBL082C	16.7568	0.221132	0.89602	0.246794	0.805068	0.999757
YBL085W	9.94866	-0.463769	1.15577	-0.401263	0.688226	0.999757
YIL056W	30.1255	0.20876	0.688353	0.303274	0.761681	0.999757
YKR021W	36.803	1.6626	0.611078	2.72077	0.00651296	0.999757
YPR176C	3.4418	-0.532459	2.16613	-0.245811	0.805828	0.999757
YBL076C	4.96049	0.154355	1.64842	0.0936383	0.925396	0.999757
YBL075C	14.3878	-0.382381	0.973715	-0.392703	0.694539	0.999757
YPL231W	11.3881	-0.143456	1.07514	-0.13343	0.893853	0.999757
YDL003W	4.84149	0.19717	1.67104	0.117993	0.906073	0.999757
YBR175W	4.66506	-2.25813	2.09697	-1.07686	0.281544	0.999757
YPR161C	7.05415	0.280158	1.33729	0.209497	0.83406	0.999757
YDL178W	17.2111	0.643566	0.89074	0.722508	0.469982	0.999757
YPR167C	6.47919	0.48351	1.39652	0.346225	0.729174	0.999757
YDR101C	4.0683	0.624471	1.85913	0.335895	0.73695	0.999757
YPL060W	17.8137	0.248928	0.862343	0.288664	0.772838	0.999757
YPL174C	4.45887	-0.239482	1.79033	-0.133764	0.893589	0.999757
YOL010W	4.64326	0.302474	1.71036	0.176848	0.859628	0.999757
YDL161W	7.19876	0.578733	1.32204	0.437757	0.661563	0.999757
YOL011W	22.7424	-0.0210851	0.785736	-0.0268348	0.978591	0.999757
YLR360W	5.23206	-0.563641	1.64531	-0.342574	0.731919	0.999757
YOL008W	1.46715	-3.16943	4.24708	-0.746263	0.455509	0.999757
YPL230W	3.87596	1.39908	1.92179	0.728009	0.466608	0.999757
YOL009C	11.1363	0.155267	1.06365	0.145976	0.88394	0.999757
YLR096W	7.57549	0.460486	1.26945	0.362746	0.716795	0.999757
YPR168W	8.98313	0.0672025	1.18165	0.0568716	0.954647	0.999757
YOL013W-A	7.14133	-0.604932	1.36894	-0.441899	0.658562	0.999757
YOR316C	19.7448	-0.282843	0.842271	-0.33581	0.737014	0.999757
YPL175W	10.7457	0.487358	1.07245	0.454432	0.649518	0.999757
YOL014W	1.53253	-0.31036	3.70718	-0.0837187	0.93328	0.999757
YKL117W	3.88392	0.0524691	1.94476	0.0269797	0.978476	0.999757
YKL116C	6.22734	0.983063	1.39962	0.702379	0.482443	0.999757
YKL114C	9.58577	-0.749644	1.22821	-0.610356	0.541626	0.999757
YKL124W	13.1051	0.0317728	0.996442	0.0318863	0.974563	0.999757
YKL122C	2.23238	0.378604	2.86272	0.132253	0.894784	0.999757
YKL121W	15.7201	0.205598	0.907877	0.22646	0.820843	0.999757
YKL120W	4.15548	-0.897831	1.97613	-0.454339	0.649585	0.999757
YDL159W	13.0514	0.245926	0.984949	0.249684	0.802832	0.999757
YOL013C	10.9557	0.889228	1.11796	0.7954	0.426381	0.999757
YKL113C	4.21498	-0.919498	1.94244	-0.473372	0.635948	0.999757
YKL112W	9.60964	0.495417	1.1283	0.439084	0.660601	0.999757
YPR070W	1.84976	-0.672695	3.31235	-0.203087	0.839067	0.999757
YPR071W	4.78199	0.21935	1.70039	0.129	0.897358	0.999757
YPL063W	7.95222	0.351347	1.23872	0.283638	0.776688	0.999757
YPL172C	0.773185	-2.25923	6.01234	-0.375765	0.707092	0.999757
YOL115W	16.8184	-0.297365	0.900604	-0.330183	0.741261	0.999757
YPR134W	1.2748	0.0819289	4.09616	0.0200014	0.984042	0.999757
YPL022W	7.32571	-0.210597	1.31973	-0.159576	0.873215	0.999757
YHR129C	3.18407	-0.37641	2.26822	-0.165949	0.868197	0.999757
YLR375W	15.4682	-1.95787	1.08956	-1.79694	0.0723457	0.999757
YLR371W	12.8293	-0.659715	1.04723	-0.62996	0.528721	0.999757
YLR372W	3.23562	1.28033	2.18159	0.586881	0.557284	0.999757
YKR084C	14.3937	1.68408	0.945236	1.78165	0.074807	0.999757
YKR085C	8.24766	1.22292	1.22105	1.00153	0.31657	0.999757
YLR376C	7.6765	-0.755768	1.39724	-0.540899	0.588577	0.999757
YLR377C	17.3221	-0.74023	0.923353	-0.801677	0.42274	0.999757
YKR080W	10.5316	1.51966	1.07849	1.40906	0.158818	0.999757
YPR139C	1.46715	-3.16943	4.24708	-0.746263	0.455509	0.999757
YKR082W	27.2884	1.6783	0.708202	2.36981	0.0177973	0.999757
YKR083C	5.32132	2.00926	1.58235	1.26979	0.204159	0.999757
YKR076W	27.2608	0.923902	0.70709	1.30663	0.191339	0.999757
YKR077W	13.6859	0.140963	0.966159	0.145901	0.884	0.999757
YKR078W	18.4046	1.03801	0.865369	1.1995	0.230334	0.999757
YKR079C	23.0596	2.30009	0.787157	2.92202	0.00347767	0.999757
YIL017C	27.816	-0.0984241	0.720063	-0.136688	0.891277	0.999757
YIL018W	0.574959	-1.82025	6.03499	-0.301617	0.762944	0.999757
YIL019W	8.83057	0.429935	1.19484	0.359825	0.718978	0.999757
YIL020C	4.65122	-1.08611	1.84241	-0.589508	0.555521	0.999757
YIL021W	11.0173	0.173759	1.06927	0.162503	0.87091	0.999757
YIL022W	5.91807	0.254938	1.46296	0.174262	0.86166	0.999757
YIL023C	13.6859	0.140963	0.966159	0.145901	0.884	0.999757
YIL024C	4.52426	0.350039	1.75107	0.1999	0.841559	0.999757
YMR296C	4.39937	-0.217281	1.8091	-0.120104	0.9044	0.999757
YIL015W	17.0644	-0.711423	0.929948	-0.765014	0.444263	0.999757
YIL016W	4.07626	-0.846938	1.97427	-0.428987	0.667932	0.999757
YGL056C	17.5837	-0.04501	0.876174	-0.051371	0.95903	0.999757
YGL057C	3.88392	0.0524691	1.94476	0.0269797	0.978476	0.999757
YGL058W	3.6203	-0.614481	2.16809	-0.283421	0.776854	0.999757
YGL059W	11.9631	-0.245793	1.05552	-0.232864	0.815867	0.999757
YGL060W	5.92602	-0.790961	1.54369	-0.512384	0.608382	0.999757
YGL061C	6.8023	0.740491	1.33354	0.555284	0.5787	0.999757
YGL062W	29.6972	-1.06406	0.749097	-1.42046	0.155474	0.999757
YGL063W	67.5909	-0.306727	0.460765	-0.665691	0.505609	0.999757
YHR138C	6.31452	0.0947826	1.43964	0.0658377	0.947507	0.999757
YHR137W	7.51806	-0.69771	1.34295	-0.519534	0.603389	0.999757
YJL049W	1.2748	0.0819289	4.09616	0.0200014	0.984042	0.999757
YJL048C	14.9984	0.669936	0.920613	0.727706	0.466793	0.999757
YJL047C-A	1.40765	-3.11463	4.33266	-0.718872	0.47222	0.999757
YJL047C	9.29241	0.576525	1.14745	0.502441	0.615358	0.999757
YGL054C	2.62295	-1.31077	2.75577	-0.475645	0.634327	0.999757
YGL055W	3.51514	-1.80101	2.36778	-0.760633	0.446876	0.999757
YLR207W	24.598	0.0473877	0.764823	0.061959	0.950595	0.999757
YLR208W	0.257728	-0.771587	6.11444	-0.126191	0.899581	0.999757
YPL217C	10.8409	-0.628246	1.11992	-0.560975	0.574815	0.999757
YLR361C	15.4108	-0.116159	0.926716	-0.125345	0.900251	0.999757
YPL170W	6.51482	-1.67353	1.59033	-1.05232	0.292655	0.999757
YOL016C	10.0677	-0.482117	1.14753	-0.420136	0.674386	0.999757
YLR262C	1.97465	0.686948	3.07816	0.223169	0.823404	0.999757
YLR259C	6.44148	-0.947533	1.48587	-0.637695	0.523672	0.999757
YLR199C	2.04799	-0.872218	3.17998	-0.274284	0.783866	0.999757
YLR257W	13.095	1.03227	0.971675	1.06236	0.288071	0.999757
YLR201C	2.74195	-1.37685	2.6709	-0.5155	0.606204	0.999757
YLR203C	7.58551	-1.91556	1.52303	-1.25772	0.208491	0.999757
YLR205C	8.2179	-0.440463	1.26129	-0.349216	0.726927	0.999757
YLR206W	4.02264	-0.0381324	1.9488	-0.0195671	0.984389	0.999757
YGR063C	0.257728	-0.771587	6.11444	-0.126191	0.899581	0.999757
YNL031C	3.68569	0.17916	2.02675	0.0883976	0.929561	0.999757
YDR075W	7.06799	-0.134227	1.34067	-0.100119	0.92025	0.999757
YNL215W	2.29188	0.326729	2.77706	0.117653	0.906343	0.999757
YCL028W	7.65678	-0.739616	1.33537	-0.553864	0.579672	0.999757
YGL141W	26.0634	0.259289	0.749805	0.345808	0.729487	0.999757
YGL140C	10.8685	-1.3716	1.20974	-1.1338	0.256878	0.999757
YGL139W	21.7094	0.45344	0.796066	0.569601	0.568948	0.999757
YGL138C	5.79111	1.17751	1.50578	0.781994	0.434218	0.999757
YGL137W	10.4939	0.784707	1.07793	0.727977	0.466628	0.999757
YGL136C	7.92039	-0.382462	1.31817	-0.290146	0.771705	0.999757
YGL135W	2.68245	-1.34431	2.70333	-0.497279	0.618992	0.999757
YGL134W	11.0709	-0.084933	1.08306	-0.0784194	0.937494	0.999757
YGL133W	19.0767	-0.0495934	0.868423	-0.0571074	0.95446	0.999757
YGL131C	17.5321	-0.384243	0.891627	-0.430946	0.666507	0.999757
YBR247C	2.60911	0.0386099	2.55921	0.0150867	0.987963	0.999757
YBR246W	15.0638	0.825593	0.912551	0.904709	0.36562	0.999757
YBR241C	28.603	-0.265908	0.711795	-0.373574	0.708722	0.999757
YBR240C	9.55809	-0.0663609	1.15296	-0.057557	0.954102	0.999757
YBR243C	1.20942	-2.88779	4.73552	-0.609815	0.541985	0.999757
YBR242W	10.1926	-0.198057	1.12332	-0.176314	0.860047	0.999757
YGR245C	11.6538	-0.756695	1.1013	-0.687089	0.492026	0.999757
YGR244C	41.5711	0.308561	0.581606	0.530532	0.595743	0.999757
YOR377W	18.1507	0.199549	0.859056	0.232289	0.816314	0.999757
YDR044W	2.48422	-1.20258	2.81909	-0.426586	0.669681	0.999757
YJL192C	9.7366	-0.0967618	1.14686	-0.0843709	0.932762	0.999757
YGR239C	21.7433	0.338546	0.800916	0.422698	0.672515	0.999757
YGR238C	26.8543	0.481835	0.717786	0.671279	0.502043	0.999757
YGR237C	14.0924	-1.10696	1.02843	-1.07636	0.281765	0.999757
YGR236C	5.29156	-0.58112	1.63016	-0.35648	0.721481	0.999757
YGR243W	3.51514	-1.80101	2.36778	-0.760633	0.446876	0.999757
YGR241C	16.7648	-0.116292	0.901837	-0.12895	0.897397	0.999757
YGR240C-A	16.2217	0.305925	0.894749	0.341911	0.732418	0.999757
YGR240C	3.31691	-1.69866	2.4305	-0.698894	0.484618	0.999757
YOR315W	7.71628	-0.751099	1.32819	-0.565505	0.57173	0.999757
YPL168W	7.19876	0.578733	1.32204	0.437757	0.661563	0.999757
YJR121W	4.53221	-1.04804	1.86447	-0.562113	0.574039	0.999757
YJR122W	8.76312	1.03336	1.17315	0.880839	0.378405	0.999757
YDL232W	0.257728	-0.771587	6.11444	-0.126191	0.899581	0.999757
YJR117W	20.3872	-0.671564	0.851965	-0.788254	0.430548	0.999757
YJR118C	3.81058	0.800758	1.94801	0.411064	0.681026	0.999757
YJR119C	30.7382	0.429254	0.673073	0.637752	0.523635	0.999757
YJR120W	6.81614	0.341107	1.35283	0.252142	0.800931	0.999757
YJR112W-A	6.99465	0.295289	1.33143	0.221784	0.824482	0.999757
YJR113C	5.20438	0.579429	1.61435	0.358923	0.719652	0.999757
YJR115W	22.1515	-0.834868	0.839102	-0.994955	0.319758	0.999757
YJR116W	14.4314	0.410645	0.943405	0.43528	0.663359	0.999757
YPL081W	5.86652	-0.77593	1.54926	-0.500838	0.616485	0.999757
YPL082C	20.857	0.559678	0.801143	0.698599	0.484802	0.999757
YPL079W	2.86684	-0.165893	2.41417	-0.0687162	0.945216	0.999757
YPL085W	10.4562	0.0230316	1.11449	0.0206655	0.983512	0.999757
YCL035C	4.20115	-0.112936	1.85568	-0.0608596	0.951471	0.999757
YPL083C	6.43353	0.0627845	1.40229	0.0447729	0.964288	0.999757
YPL084W	6.04296	0.643606	1.43154	0.449589	0.653007	0.999757
YPL076W	3.32279	-0.475125	2.24553	-0.211587	0.832429	0.999757
YAL018C	4.84149	0.19717	1.67104	0.117993	0.906073	0.999757
YPL169C	3.24946	0.454123	2.19363	0.207019	0.835995	0.999757
YDL067C	0.257728	-0.771587	6.11444	-0.126191	0.899581	0.999757
YNL241C	26.9674	-0.7469	0.751886	-0.993368	0.32053	0.999757
YNL242W	41.506	0.25732	0.609473	0.422201	0.672878	0.999757
YDR036C	5.67418	-0.149103	1.52994	-0.0974571	0.922363	0.999757
YJL044C	11.5625	-1.47378	1.17402	-1.25533	0.209359	0.999757
YNL243W	14.5047	0.209516	0.942272	0.222352	0.82404	0.999757
YNL195C	13.8942	-1.07959	1.03612	-1.04195	0.297433	0.999757
YLR356W	2.49011	0.124794	2.68921	0.0464054	0.962987	0.999757
YCL036W	18.9238	0.104215	0.851717	0.122359	0.902615	0.999757
YNL293W	22.7901	-0.280776	0.797764	-0.351954	0.724873	0.999757
YNL220W	2.286	-1.04647	3.02399	-0.346056	0.729301	0.999757
YGR103W	2.6745	0.960601	2.51632	0.381748	0.702648	0.999757
YCL026C-A	6.30864	-0.360944	1.44499	-0.24979	0.80275	0.999757
YGR101W	2.42472	-1.1657	2.84933	-0.409112	0.682458	0.999757
YGR100W	21.1365	0.141557	0.80429	0.176003	0.860292	0.999757
YGR099W	10.2382	0.0860034	1.11939	0.0768308	0.938758	0.999757
YGR098C	5.33723	0.000489077	1.60621	0.000304492	0.999757	0.999757
YGR097W	27.0148	0.164401	0.732007	0.224589	0.822299	0.999757
YGR096W	27.8655	-0.680087	0.737653	-0.921961	0.356549	0.999757
YGR095C	2.48422	-1.20258	2.81909	-0.426586	0.669681	0.999757
YGR094W	12.7799	0.509352	0.989221	0.514902	0.606622	0.999757
YGL190C	11.4535	0.0940392	1.05378	0.0892397	0.928891	0.999757
YIL039W	15.8965	0.681553	0.89352	0.762773	0.445599	0.999757
YGL192W	12.7442	-0.923726	1.0643	-0.867918	0.385439	0.999757
YGL191W	4.22882	-2.10951	2.21555	-0.952137	0.341028	0.999757
YGL194C	6.78847	1.13716	1.35322	0.840333	0.400722	0.999757
YGL193C	6.37609	-1.63045	1.60501	-1.01585	0.309703	0.999757
YGL195W	49.5233	0.315382	0.530759	0.59421	0.552372	0.999757
YGL194C-A	1.01708	0.623191	4.65075	0.133998	0.893404	0.999757
YIL046W	11.3919	0.791394	1.05115	0.752886	0.451519	0.999757
YIL046W-A	24.6516	-0.0702946	0.758055	-0.0927302	0.926118	0.999757
YIL044C	11.0768	0.164481	1.065	0.154442	0.877261	0.999757
YIL045W	16.1563	0.148492	0.905819	0.163932	0.869785	0.999757
YIL042C	11.8361	0.254947	1.02991	0.247542	0.804489	0.999757
YIL043C	20.0322	0.402096	0.819672	0.490556	0.62374	0.999757
YGL188C-A	0.257728	-0.771587	6.11444	-0.126191	0.899581	0.999757
YGL187C	3.56669	0.239342	2.05467	0.116487	0.907267	0.999757
YDR534C	5.04767	-1.24162	1.77515	-0.699443	0.484275	0.999757
YDR536W	14.8735	0.517671	0.929005	0.557231	0.577369	0.999757
YDR532C	2.16699	-0.961913	3.03084	-0.317376	0.750959	0.999757
YDR533C	12.4844	-0.0969553	1.01764	-0.0952746	0.924097	0.999757
YDR540C	3.32279	-0.475125	2.24553	-0.211587	0.832429	0.999757
YDR541C	14.6355	0.547977	0.929932	0.589266	0.555683	0.999757
YDR538W	3.10278	2.32988	2.2935	1.01586	0.309694	0.999757
YDR539W	12.8017	-0.148553	1.00782	-0.1474	0.882816	0.999757
YPR055W	8.47563	-0.502484	1.24638	-0.403155	0.686835	0.999757
YPR054W	12.875	-0.402164	1.01864	-0.394804	0.692988	0.999757
YDR542W	1.14992	-2.82045	4.82416	-0.584652	0.558782	0.999757
YCL027W	18.3887	0.176579	0.853105	0.206984	0.836022	0.999757
YML046W	2.99968	-1.53242	2.55073	-0.600777	0.547989	0.999757
YML045W	0.892189	-2.45098	5.54855	-0.441733	0.658682	0.999757
YOR260W	8.9098	0.394748	1.17072	0.337185	0.735978	0.999757
YPR061C	10.1133	-0.172624	1.14197	-0.151163	0.879847	0.999757
YDL215C	42.1242	-0.195109	0.588196	-0.331708	0.74011	0.999757
YCR067C	21.6381	0.219091	0.794419	0.275788	0.782711	0.999757
YNL236W	15.5495	-0.139241	0.926961	-0.150212	0.880597	0.999757
YCR066W	8.5213	-0.135674	1.23722	-0.109661	0.912678	0.999757
YPR174C	4.20115	-0.112936	1.85568	-0.0608596	0.951471	0.999757
YNL237W	12.8394	0.500658	0.992286	0.50455	0.613875	0.999757
YCR069W	15.2561	0.624845	0.912693	0.684617	0.493585	0.999757
YCL034W	25.8849	0.272127	0.738438	0.368518	0.712487	0.999757
YNL234W	13.8049	0.126023	0.967541	0.13025	0.896368	0.999757
YMR053C	18.3233	0.0337162	0.863245	0.0390575	0.968845	0.999757
YNL232W	3.61823	1.64698	2.01459	0.817525	0.413628	0.999757
YNL231C	26.3686	0.011198	0.732786	0.0152814	0.987808	0.999757
YNL230C	29.3783	0.366753	0.693905	0.528535	0.597128	0.999757
YNL229C	0.515457	-1.67883	6.04385	-0.277775	0.781185	0.999757
YNL227C	13.6323	0.341438	0.975162	0.350135	0.726238	0.999757
YMR052W	3.88392	0.0524691	1.94476	0.0269797	0.978476	0.999757
YDR208W	13.222	0.624916	0.971601	0.643181	0.520106	0.999757
YDR210W	1.53253	-0.31036	3.70718	-0.0837187	0.93328	0.999757
YDR206W	7.33367	-1.17758	1.41382	-0.832909	0.404896	0.999757
YDR207C	9.11009	-0.638805	1.21706	-0.524876	0.59967	0.999757
YDR204W	4.90688	0.695266	1.67818	0.414297	0.678657	0.999757
YDR205W	17.1613	-0.169022	0.913051	-0.185117	0.853137	0.999757
YDR201W	0.574959	-1.82025	6.03499	-0.301617	0.762944	0.999757
YDR202C	2.35138	0.27699	2.74174	0.101027	0.919529	0.999757
YMR036C	9.28653	0.302834	1.1528	0.262696	0.792785	0.999757
YMR037C	9.92099	0.154798	1.12908	0.137101	0.890951	0.999757
YMR038C	13.5451	-1.73907	1.1226	-1.54914	0.121347	0.999757
YMR039C	8.01172	0.338074	1.23929	0.272796	0.78501	0.999757
YMR040W	8.40229	-0.112459	1.22801	-0.0915783	0.927033	0.999757
YMR041C	4.39937	-0.217281	1.8091	-0.120104	0.9044	0.999757
YDR421W	21.3704	-0.447914	0.831465	-0.538704	0.590091	0.999757
YDR422C	20.1391	0.107956	0.835989	0.129136	0.89725	0.999757
YDR419W	16.7828	0.392324	0.888129	0.441743	0.658675	0.999757
YDR420W	19.7247	-0.291915	0.881384	-0.331201	0.740493	0.999757
YDR416W	5.61468	-0.131594	1.55233	-0.0847723	0.932442	0.999757
YDR418W	4.11985	1.86848	1.85702	1.00617	0.314335	0.999757
YAL058W	19.7963	0.0127174	0.831408	0.0152963	0.987796	0.999757
YDR415C	8.92363	0.0784875	1.19228	0.0658295	0.947514	0.999757
YDR411C	11.8202	-1.51181	1.16838	-1.29393	0.195689	0.999757
YAL061W	53.4172	0.039058	0.51308	0.0761245	0.93932	0.999757
YMR163C	5.72573	0.781057	1.48092	0.527412	0.597907	0.999757
YNL247W	5.33516	1.45933	1.54517	0.944444	0.344943	0.999757
YNL246W	5.66034	0.361631	1.5011	0.24091	0.809625	0.999757
YMR047C	15.0638	0.825593	0.912551	0.904709	0.36562	0.999757
YPL056C	15.4741	-1.59216	1.05465	-1.50966	0.131131	0.999757
YHR142W	9.94659	0.399457	1.15734	0.34515	0.729981	0.999757
YNL253W	11.9036	-0.237679	1.05199	-0.225932	0.821254	0.999757
YNL252C	4.00292	-0.000715042	1.93689	-0.000369169	0.999705	0.999757
YNL255C	2.86684	-0.165893	2.41417	-0.0687162	0.945216	0.999757
YMR046C	11.3345	0.111834	1.05617	0.105887	0.915672	0.999757
YNL249C	7.12749	-0.147874	1.34019	-0.110338	0.912141	0.999757
YHR139C	5.74752	-0.745176	1.57808	-0.472206	0.63678	0.999757
YNL251C	11.156	0.139247	1.08106	0.128805	0.897512	0.999757
YNL250W	22.6611	0.353186	0.777785	0.454092	0.649763	0.999757
YER030W	0.574959	-1.82025	6.03499	-0.301617	0.762944	0.999757
YER031C	8.09302	-0.835265	1.30724	-0.638956	0.522852	0.999757
YER028C	15.1392	0.115124	0.93206	0.123516	0.901699	0.999757
YER029C	2.99173	0.664491	2.30533	0.288241	0.773162	0.999757
YER026C	1.09042	-2.74969	4.98424	-0.551677	0.58117	0.999757
YER027C	12.6906	-0.634818	1.04095	-0.609843	0.541966	0.999757
YER024W	35.917	0.38439	0.636705	0.603717	0.546032	0.999757
YNL067W	4.84944	-1.16597	1.80038	-0.647623	0.517229	0.999757
YHR144C	5.92602	-0.790961	1.54369	-0.512384	0.608382	0.999757
YCL032W	25.1771	0.443022	0.744936	0.594712	0.552036	0.999757
YAL040C	12.7799	0.509352	0.989221	0.514902	0.606622	0.999757
YER032W	19.0726	0.789371	0.827609	0.953797	0.340187	0.999757
YER033C	15.5377	-0.533887	0.94995	-0.562015	0.574106	0.999757
YAL039C	24.7845	-0.201426	0.760127	-0.264989	0.791018	0.999757
YHR143W	2.92634	-0.201467	2.39168	-0.0842366	0.932868	0.999757
YNL041C	12.6688	0.100449	1.0025	0.100199	0.920186	0.999757
YOR304W	11.4992	0.333044	1.06873	0.311626	0.755325	0.999757
YHR132C	20.8926	0.0313892	0.813099	0.0386044	0.969206	0.999757
YPL116W	7.78167	-0.340091	1.29541	-0.262534	0.79291	0.999757
YOR304C-A	0.892189	-2.45098	5.54855	-0.441733	0.658682	0.999757
YLL055W	4.86917	-1.18816	1.88165	-0.631445	0.52775	0.999757
YMR055C	12.6768	-0.368349	1.02416	-0.35966	0.719102	0.999757
YLL056C	4.28037	-0.170766	1.88845	-0.090427	0.927948	0.999757
YMR054W	21.0313	0.013999	0.819189	0.0170889	0.986366	0.999757
YOR250C	6.7428	0.757558	1.34229	0.564377	0.572497	0.999757
YLL057C	15.9975	0.157078	0.919598	0.170811	0.864372	0.999757
YHR215W	3.12457	-0.34497	2.29557	-0.150277	0.880546	0.999757
YBR132C	18.2915	-0.293606	0.870815	-0.337163	0.735994	0.999757
YBR131W	8.40229	-0.112459	1.22801	-0.0915783	0.927033	0.999757
YBR130C	2.86684	-0.165893	2.41417	-0.0687162	0.945216	0.999757
YBR129C	2.74195	-1.37685	2.6709	-0.5155	0.606204	0.999757
YBR137W	2.88068	-1.47327	2.63519	-0.559074	0.576111	0.999757
YBR136W	24.1362	-0.0241386	0.763367	-0.0316212	0.974774	0.999757
YBR133C	25.1889	0.643061	0.73657	0.873049	0.382636	0.999757
YBR139W	20.7916	0.443458	0.807899	0.548903	0.583072	0.999757
YBR138C	13.3905	-0.481192	1.00662	-0.478028	0.63263	0.999757
YPL117C	4.45887	-0.239482	1.79033	-0.133764	0.893589	0.999757
YPL265W	23.9518	-0.129853	0.769448	-0.168761	0.865984	0.999757
YDR098C	5.71189	1.2512	1.48182	0.84437	0.398463	0.999757
YDR093W	58.1716	-0.353889	0.499155	-0.708976	0.478339	0.999757
YER133W	8.51127	1.40869	1.18737	1.18639	0.235466	0.999757
YER134C	6.2353	0.139163	1.42479	0.0976723	0.922192	0.999757
YER127W	0.515457	-1.67883	6.04385	-0.277775	0.781185	0.999757
YER128W	8.16428	-0.0652398	1.25872	-0.0518301	0.958664	0.999757
YER125W	9.86149	0.165217	1.12596	0.146734	0.883342	0.999757
YER126C	3.94342	0.0257586	1.93318	0.0133245	0.989369	0.999757
YER131W	0.257728	-0.771587	6.11444	-0.126191	0.899581	0.999757
YER132C	42.4477	-0.133347	0.590944	-0.225651	0.821473	0.999757
YER129W	35.1258	0.202877	0.633202	0.320399	0.748666	0.999757
YER130C	24.9153	0.0200802	0.758763	0.0264644	0.978887	0.999757
YLR351C	8.55278	0.484756	1.87846	0.25806	0.79636	0.999757
YOL021C	13.5015	-0.0390437	0.978804	-0.0398893	0.968181	0.999757
YNL039W	6.8023	0.740491	1.33354	0.555284	0.5787	0.999757
YMR307W	4.58376	0.325967	1.7238	0.189098	0.850016	0.999757
YHR140W	12.6093	0.108479	1.0055	0.107886	0.914086	0.999757
YLR352W	20.6726	-1.07013	0.869047	-1.23138	0.218179	0.999757
YPL109C	23.1073	-0.30839	0.795612	-0.387613	0.698302	0.999757
YPL262W	8.9098	0.394748	1.17072	0.337185	0.735978	0.999757
YPR074C	6.50098	-0.960888	1.48201	-0.648366	0.516749	0.999757
YLR271W	3.30307	-0.437824	2.27005	-0.19287	0.847061	0.999757
YPR173C	2.30572	-1.08803	2.99386	-0.36342	0.716291	0.999757
YDR096W	5.28568	-1.30743	1.74332	-0.749967	0.453275	0.999757
YMR026C	1.46715	-3.16943	4.24708	-0.746263	0.455509	0.999757
YMR215W	6.82998	-0.0775947	1.39919	-0.055457	0.955774	0.999757
YLR270W	4.52426	0.350039	1.75107	0.1999	0.841559	0.999757
YNL291C	44.0636	0.1213	0.590107	0.205556	0.837138	0.999757
YNL213C	0.699846	1.67103	5.94183	0.281231	0.778533	0.999757
YMR206W	13.3628	-0.0115778	0.986848	-0.0117321	0.990639	0.999757
YKR017C	12.7996	2.65095	1.01603	2.60912	0.00907752	0.999757
YMR208W	10.8052	0.477118	1.07576	0.443518	0.657391	0.999757
YMR209C	10.3174	0.0588836	1.10541	0.0532687	0.957518	0.999757
YMR210W	18.123	0.505742	0.850695	0.594504	0.552175	0.999757
YMR211W	4.33987	-0.194477	1.84036	-0.105674	0.915841	0.999757
YMR212C	7.18492	0.949933	1.29385	0.734191	0.462832	0.999757
YKR018C	22.2844	1.55233	0.776892	1.99813	0.0457029	0.999757
YNL038W	4.44504	0.415893	1.78385	0.233144	0.81565	0.999757
YMR306W	40.9328	0.0797177	0.587371	0.13572	0.892043	0.999757
YNL263C	6.73692	0.386334	1.36114	0.283832	0.776539	0.999757
YLR108C	8.28329	-0.089182	1.2347	-0.0722296	0.942419	0.999757
YLR357W	8.60847	-0.950873	1.27782	-0.744139	0.456792	0.999757
YAL064W	1.09042	-2.74969	4.98424	-0.551677	0.58117	0.999757
YPL110C	27.0328	-0.622166	0.745565	-0.834489	0.404005	0.999757
YPL263C	19.0806	0.517971	0.831259	0.623116	0.533208	0.999757
YPR075C	4.58376	0.325967	1.7238	0.189098	0.850016	0.999757
YLR358C	2.04799	-0.872218	3.17998	-0.274284	0.783866	0.999757
YDL072C	5.34311	0.497564	1.5502	0.320967	0.748235	0.999757
YJL051W	19.933	0.403713	0.830053	0.48637	0.626705	0.999757
YMR025W	1.40765	-3.11463	4.33266	-0.718872	0.47222	0.999757
YNL261W	1.77642	0.998564	3.295	0.303054	0.761849	0.999757
YBR004C	2.7935	0.863638	2.41617	0.35744	0.720762	0.999757
YBR003W	8.77902	-0.199516	1.2175	-0.163873	0.869831	0.999757
YBR002C	4.71072	-1.10487	1.84283	-0.599553	0.548804	0.999757
YBR001C	70.7096	-0.35175	0.451624	-0.778855	0.436065	0.999757
YBL001C	21.2001	-0.741643	0.856909	-0.865486	0.386772	0.999757
YBL002W	8.60847	-0.950873	1.27782	-0.744139	0.456792	0.999757
YBL003C	9.54633	-0.72155	1.21477	-0.593983	0.552524	0.999757
YBL004W	13.2438	0.00345484	0.985674	0.00350505	0.997203	0.999757
YDL084W	2.41088	0.228221	2.75585	0.0828134	0.934	0.999757
YMR243C	13.1922	-0.449268	1.00944	-0.445067	0.656271	0.999757
YGR222W	2.09365	0.562713	2.98749	0.188356	0.850597	0.999757
YBR006W	36.0318	0.0665275	0.626908	0.10612	0.915487	0.999757
YBR005W	7.65678	-0.739616	1.33537	-0.553864	0.579672	0.999757
YHR146W	5.99141	-0.258918	1.48354	-0.174527	0.861451	0.999757
YOL082W	7.07387	0.253075	1.33366	0.18976	0.849497	0.999757
YOL081W	22.923	-0.430885	0.80161	-0.537524	0.590906	0.999757
YOL084W	33.3314	-0.102361	0.662457	-0.154518	0.877202	0.999757
YOL083W	8.12866	1.25521	1.21099	1.03652	0.29996	0.999757
YOL086W-A	5.35106	-0.598326	1.62229	-0.368816	0.712265	0.999757
YOL086C	1.65154	-0.44081	3.57506	-0.123301	0.901868	0.999757
YLR268W	4.97433	-0.463479	1.6867	-0.274784	0.783482	0.999757
YJL050W	12.6173	-0.360938	1.02563	-0.351919	0.724899	0.999757
YOL077W-A	4.14164	-0.0887101	1.87156	-0.0473989	0.962195	0.999757
YLR267W	6.5802	-0.993903	1.48649	-0.668626	0.503734	0.999757
YPR141C	11.3802	0.352233	1.05351	0.334343	0.73812	0.999757
YPL186C	16.9433	-0.133888	0.891042	-0.150261	0.880559	0.999757
YAL020C	12.8155	-0.394893	1.02273	-0.386117	0.69941	0.999757
YGR223C	8.51923	0.808788	1.18616	0.681856	0.49533	0.999757
YDL065C	10.0736	-0.179074	1.13525	-0.157739	0.874662	0.999757
YNL044W	3.96521	-4.60835	2.69441	-1.71034	0.0872039	0.999757
YPL224C	19.1698	-0.222391	0.85024	-0.261563	0.793659	0.999757
YCR030C	23.5654	-0.778313	0.813111	-0.957204	0.338464	0.999757
YOL125W	20.153	-0.036387	0.851513	-0.0427321	0.965915	0.999757
YPL112C	3.13841	-1.61933	2.53507	-0.638772	0.522971	0.999757
YOR229W	28.4643	-0.253932	0.715117	-0.355092	0.722521	0.999757
YOR011W	25.3556	-0.76688	0.781139	-0.981746	0.326225	0.999757
YPL222W	17.6788	-0.78831	0.915795	-0.860794	0.389352	0.999757
YPR140W	10.2123	-0.213156	1.15356	-0.184781	0.853401	0.999757
YKL205W	13.9575	-0.113386	0.97163	-0.116697	0.9071	0.999757
YKL206C	5.03383	-0.482174	1.67329	-0.28816	0.773224	0.999757
YKL207W	8.01968	-0.387339	1.28039	-0.302517	0.762258	0.999757
YBL088C	62.3053	0.226464	0.471124	0.480689	0.630738	0.999757
YKL209C	36.7912	-0.757379	0.645759	-1.17285	0.240855	0.999757
YKL210W	13.916	0.501656	0.96375	0.520525	0.602698	0.999757
YKL211C	3.76491	0.107995	2.01854	0.0535017	0.957332	0.999757
YKL212W	8.9693	0.382834	1.16746	0.327921	0.742971	0.999757
YBL092W	1.01708	0.623191	4.65075	0.133998	0.893404	0.999757
YBL093C	4.45887	-0.239482	1.79033	-0.133764	0.893589	0.999757
YBL095W	9.94071	0.136411	1.12938	0.120784	0.903862	0.999757
YBL097W	16.2891	-0.0448336	0.909022	-0.0493207	0.960664	0.999757
YBL089W	8.62819	-0.965751	1.30225	-0.741601	0.458329	0.999757
YBL090W	4.58376	0.325967	1.7238	0.189098	0.850016	0.999757
YBL091C	12.7878	0.084477	1.00334	0.0841961	0.932901	0.999757
YBL091C-A	8.58668	0.178122	1.20391	0.147953	0.88238	0.999757
YNL005C	5.67625	-2.56001	1.96599	-1.30215	0.192865	0.999757
YNL004W	53.9524	0.0147414	0.513802	0.0286908	0.977111	0.999757
YPL226W	6.81026	-0.0535553	1.36489	-0.0392379	0.968701	0.999757
YDL017W	9.30036	-0.00645238	1.16337	-0.00554626	0.995575	0.999757
YDR071C	7.42881	1.21061	1.26927	0.953785	0.340192	0.999757
YNL011C	2.10749	-0.918012	3.08423	-0.297647	0.765973	0.999757
YNL010W	8.29124	-0.883818	1.29435	-0.682826	0.494717	0.999757
YNL014W	16.7786	-0.300335	0.919022	-0.326798	0.743821	0.999757
YNL012W	32.6793	-0.332421	0.669275	-0.496688	0.619409	0.999757
YNL007C	2.21854	1.58674	2.84438	0.557852	0.576945	0.999757
YNL006W	1.65154	-0.44081	3.57506	-0.123301	0.901868	0.999757
YNL009W	23.9539	-0.519028	0.785428	-0.660822	0.508727	0.999757
YNL008C	21.0175	0.151504	0.809178	0.187232	0.851479	0.999757
YDL245C	2.80145	-1.40867	2.65537	-0.530499	0.595766	0.999757
YDR081C	3.71336	-1.89647	2.32982	-0.813999	0.415645	0.999757
YNL042W	12.6173	-0.360938	1.02563	-0.351919	0.724899	0.999757
YPL177C	5.85857	0.272756	1.47375	0.185077	0.853169	0.999757
YOR009W	1.71692	1.08011	3.35381	0.322053	0.747412	0.999757
YOR226C	6.69921	-1.01987	1.46273	-0.697237	0.485655	0.999757
YPL184C	8.38638	1.15525	1.19262	0.968668	0.332711	0.999757
YPL221W	30.4092	-0.721777	0.708314	-1.01901	0.3082	0.999757
YDL070W	10.0061	0.388123	1.13647	0.341515	0.732716	0.999757
YKL101W	26.7294	-0.733288	0.757984	-0.967419	0.333334	0.999757
YKL103C	15.2264	-0.289281	0.938941	-0.308093	0.758011	0.999757
YKL107W	4.39349	-0.981666	1.9026	-0.515959	0.605883	0.999757
YKL108W	5.03383	-0.482174	1.67329	-0.28816	0.773224	0.999757
YKL109W	22.2864	0.0249507	0.789274	0.0316123	0.974781	0.999757
YKL110C	3.77287	-1.9187	2.29629	-0.835564	0.4034	0.999757
YKL104C	9.03087	-0.613556	1.25191	-0.490095	0.624066	0.999757
YKL105C	27.9032	-0.325014	0.722436	-0.449887	0.652792	0.999757
YKL106W	3.64002	-0.647708	2.1116	-0.306738	0.759043	0.999757
YKL106C-A	3.24357	-0.407238	2.25887	-0.180284	0.85693	0.999757
YML054C-A	11.3106	-1.0499	1.15331	-0.91034	0.362643	0.999757
YBR239C	24.5804	-0.304785	0.768573	-0.396559	0.691692	0.999757
YDL047W	5.59288	1.29868	1.50284	0.864154	0.387503	0.999757
YIL108W	23.5553	-0.091519	0.775191	-0.11806	0.90602	0.999757
YPL108W	12.1018	-0.274726	1.04161	-0.263751	0.791972	0.999757
YPR073C	7.06799	-0.134227	1.34067	-0.100119	0.92025	0.999757
YKR068C	9.64528	2.11759	1.15009	1.84124	0.0655864	0.999757
YKR067W	43.4724	0.988881	0.560301	1.76491	0.0775788	0.999757
YKR066C	18.4838	1.0174	0.839505	1.21191	0.225549	0.999757
YKR065C	1.91515	0.756928	3.41167	0.221865	0.824419	0.999757
YKR072C	22.8216	1.12609	0.774965	1.45309	0.146199	0.999757
YKR071C	10.1549	1.64046	1.09326	1.50052	0.133479	0.999757
YKR070W	11.4238	1.25132	1.04122	1.20177	0.229452	0.999757
YKR069W	26.8107	1.06529	0.71166	1.49691	0.134417	0.999757
YLR392C	10.7755	-0.95289	1.14994	-0.82864	0.407308	0.999757
YLR390W-A	2.88068	-1.47327	2.63519	-0.559074	0.576111	0.999757
YKR075C	13.8703	0.310352	0.955647	0.324756	0.745365	0.999757
YKR074W	10.8983	2.73372	1.10202	2.48063	0.0131149	0.999757
YAL013W	3.43384	1.07833	2.08979	0.515998	0.605856	0.999757
YBR230W-A	12.9286	-0.663008	1.03932	-0.637925	0.523522	0.999757
YDL064W	3.05918	-1.56087	2.53156	-0.616565	0.537521	0.999757
YLL029W	51.4921	0.279227	0.519357	0.537639	0.590826	0.999757
YBR231C	5.17256	-0.545744	1.6687	-0.327048	0.743632	0.999757
YDL102W	13.1625	0.633528	0.9711	0.652382	0.514155	0.999757
YBR233W	7.11953	0.625032	1.30502	0.478944	0.631978	0.999757
YHR163W	2.36522	-1.12768	2.9027	-0.388493	0.697651	0.999757
YHR166C	12.3914	0.161516	1.04127	0.155113	0.876732	0.999757
YHR159W	18.6979	0.429574	0.841352	0.510576	0.609648	0.999757
YHR160C	2.9938	-4.194	3.02211	-1.38777	0.165207	0.999757
YHR161C	23.6228	-0.353852	0.78656	-0.449873	0.652802	0.999757
YHR162W	2.24033	-3.7861	3.41252	-1.10947	0.267227	0.999757
YJL053W	4.96049	0.154355	1.64842	0.0936383	0.925396	0.999757
YJL054W	9.66326	0.216069	1.14508	0.188694	0.850332	0.999757
YJL055W	3.55873	1.69186	2.07521	0.815272	0.414916	0.999757
YJL056C	13.5451	0.749041	0.95717	0.782558	0.433887	0.999757
YHR167W	5.72573	0.781057	1.48092	0.527412	0.597907	0.999757
YHR168W	5.09922	0.078996	1.62567	0.0485929	0.961244	0.999757
YJL059W	8.97725	-0.25005	1.19759	-0.208794	0.834609	0.999757
YJL060W	10.8983	0.192711	1.08712	0.177268	0.859298	0.999757
YML100W-A	12.3139	-0.580055	1.05784	-0.54834	0.583459	0.999757
YLR251W	3.81058	0.800758	1.94801	0.411064	0.681026	0.999757
YIL107C	20.3713	-0.048929	0.823524	-0.0594142	0.952622	0.999757
YLR219W	11.6061	-0.196769	1.06784	-0.184269	0.853802	0.999757
YLR218C	6.06475	-0.842729	1.53237	-0.549952	0.582352	0.999757
YLR216C	3.45564	-1.7769	2.40108	-0.740043	0.459274	0.999757
YLR215C	0.515457	-1.67883	6.04385	-0.277775	0.781185	0.999757
YLR214W	13.7077	-0.525835	0.997353	-0.52723	0.598034	0.999757
YLR213C	19.5009	-0.420388	0.852089	-0.493361	0.621757	0.999757
YLR212C	1.9231	-3.56824	3.69414	-0.96592	0.334084	0.999757
YLR211C	1.72488	-3.40525	3.89362	-0.874571	0.381807	0.999757
YLR210W	5.82086	-1.49051	1.68034	-0.887031	0.375062	0.999757
YLR209C	7.63499	0.446286	1.26098	0.35392	0.723399	0.999757
YCL039W	39.4619	0.574876	0.607338	0.946551	0.343867	0.999757
YOR239W	14.2093	-0.362585	0.971388	-0.373265	0.708951	0.999757
YDR049W	4.13576	-0.869172	1.97409	-0.44029	0.659727	0.999757
YCL040W	91.4673	0.185721	0.385014	0.482374	0.62954	0.999757
YPR004C	3.75903	-0.698281	2.06078	-0.338843	0.734728	0.999757
YCL037C	2.86684	-0.165893	2.41417	-0.0687162	0.945216	0.999757
YDR084C	1.97465	0.686948	3.07816	0.223169	0.823404	0.999757
YNL037C	5.92602	-0.790961	1.54369	-0.512384	0.608382	0.999757
YMR313C	9.02673	1.21366	1.16075	1.04558	0.295754	0.999757
YGL124C	10.4423	0.295969	1.09243	0.270926	0.786448	0.999757
YGL125W	34.6519	-0.0124768	0.642702	-0.0194131	0.984512	0.999757
YGL126W	80.2279	-0.732891	0.432892	-1.69301	0.0904535	0.999757
YGL127C	4.32603	0.467475	1.78568	0.261791	0.793483	0.999757
YIL122W	3.93546	1.3621	1.8952	0.718712	0.472319	0.999757
YIL121W	26.2634	-0.0937862	0.747073	-0.125538	0.900097	0.999757
YIL124W	3.25741	-1.67292	2.45178	-0.682328	0.495032	0.999757
YGR193C	5.91807	0.254938	1.46296	0.174262	0.86166	0.999757
YIL126W	25.6649	-0.517351	0.765203	-0.676096	0.49898	0.999757
YIL125W	35.8734	0.0811875	0.64174	0.126512	0.899327	0.999757
YIL128W	8.9693	0.382834	1.16746	0.327921	0.742971	0.999757
YIL127C	0.515457	-1.67883	6.04385	-0.277775	0.781185	0.999757
YGL121C	3.69953	-0.673301	2.07951	-0.323779	0.746105	0.999757
YGL122C	5.91011	1.13236	1.44527	0.78349	0.433339	0.999757
YDL113C	9.82966	-0.444925	1.17554	-0.378486	0.70507	0.999757
YPL279C	4.96049	0.154355	1.64842	0.0936383	0.925396	0.999757
YML062C	11.3345	0.111834	1.05617	0.105887	0.915672	0.999757
YPL277C	11.2473	0.61481	1.05324	0.583732	0.5594	0.999757
YIL102C-A	3.76491	0.107995	2.01854	0.0535017	0.957332	0.999757
YHL025W	28.5951	-0.0569318	0.705753	-0.0806682	0.935706	0.999757
YHL024W	36.9479	-0.482718	0.635976	-0.75902	0.447841	0.999757
YHL027W	20.619	-0.878043	0.865754	-1.01419	0.31049	0.999757
YHL026C	21.9315	0.904799	0.780388	1.15942	0.246284	0.999757
YHL029C	15.9124	0.00304488	0.911212	0.00334158	0.997334	0.999757
YHL028W	25.1553	-0.351414	0.762213	-0.461045	0.644766	0.999757
YHL031C	4.44504	0.415893	1.78385	0.233144	0.81565	0.999757
YHL030W	51.7757	0.322788	0.521038	0.61951	0.53558	0.999757
YHL033C	1.77642	0.998564	3.295	0.303054	0.761849	0.999757
YHL032C	31.2021	0.219227	0.673591	0.32546	0.744833	0.999757
YJR126C	17.9742	-0.258757	0.876931	-0.295071	0.76794	0.999757
YIL104C	11.2989	1.0609	1.05137	1.00906	0.312947	0.999757
YJR124C	10.0736	-0.179074	1.13525	-0.157739	0.874662	0.999757
YJR123W	0.257728	-0.771587	6.11444	-0.126191	0.899581	0.999757
YJR131W	11.9967	-0.530806	1.07123	-0.49551	0.62024	0.999757
YJR130C	14.7109	-0.217156	0.950319	-0.228509	0.819251	0.999757
YJR129C	33.0737	-0.085638	0.663578	-0.129055	0.897314	0.999757
YIL105W-A	2.03415	0.623659	2.99757	0.208055	0.835186	0.999757
YNL284C	0.892189	-2.45098	5.54855	-0.441733	0.658682	0.999757
YJR133W	4.7166	-0.355825	1.7346	-0.205134	0.837467	0.999757
YJR132W	7.70245	-0.307736	1.29736	-0.237202	0.8125	0.999757
YIL105C	32.3264	0.0585146	0.665891	0.0878741	0.929977	0.999757
YPL045W	4.20115	-0.112936	1.85568	-0.0608596	0.951471	0.999757
YPL183C	17.5518	-0.392003	0.914087	-0.428847	0.668035	0.999757
YIL106W	1.66537	-3.35908	3.97161	-0.845773	0.39768	0.999757
YOR133W	3.05123	0.624101	2.2694	0.275007	0.783311	0.999757
YGR184C	34.4536	0.000989406	0.642867	0.00153905	0.998772	0.999757
YOR136W	3.17612	1.3256	2.19977	0.602607	0.54677	0.999757
YOR137C	10.9657	-0.350306	1.09715	-0.319287	0.749509	0.999757
YOR138C	37.1956	-0.0819101	0.620252	-0.132059	0.894937	0.999757
YOR140W	6.75871	-1.03258	1.4575	-0.708459	0.47866	0.999757
YOR141C	13.8485	0.883778	0.950438	0.929864	0.352441	0.999757
YGL207W	13.4738	0.386002	0.980208	0.393796	0.693732	0.999757
YDL105W	1.90927	-0.724676	3.26222	-0.222142	0.824203	0.999757
YNL021W	5.35106	-0.598326	1.62229	-0.368816	0.712265	0.999757
YIL109C	21.1068	0.773613	0.793617	0.974794	0.329662	0.999757
YNL284C-A	11.842	0.472328	1.03056	0.45832	0.646723	0.999757
YDL106C	10.4205	1.05236	1.07706	0.97707	0.328535	0.999757
YLR065C	0.574959	-1.82025	6.03499	-0.301617	0.762944	0.999757
YIL110W	2.7935	0.863638	2.41617	0.35744	0.720762	0.999757
YGR126W	5.02588	0.647552	1.61013	0.402174	0.687556	0.999757
YGR127W	12.5477	0.74162	1.03449	0.716896	0.473438	0.999757
YGR124W	23.4045	-0.343401	0.793487	-0.432774	0.665179	0.999757
YGR125W	14.4591	0.0170523	0.948498	0.0179782	0.985656	0.999757
YGR130C	17.2823	-0.742617	0.914616	-0.811944	0.416824	0.999757
YGR131W	6.18375	-0.871368	1.51269	-0.576038	0.56459	0.999757
YGR128C	0.773185	-2.25923	6.01234	-0.375765	0.707092	0.999757
YGR129W	5.72573	0.781057	1.48092	0.527412	0.597907	0.999757
YDL073W	6.49303	0.0472831	1.39449	0.0339072	0.972951	0.999757
YPL250C	9.52038	-1.13957	1.2519	-0.910272	0.362679	0.999757
YGR132C	6.89155	-1.76263	1.55911	-1.13054	0.258249	0.999757
YGR133W	3.19791	-1.64655	2.48493	-0.662614	0.507578	0.999757
YDR106W	4.6571	-0.335305	1.75541	-0.191012	0.848516	0.999757
YCR028C	7.873	0.389715	1.2861	0.303022	0.761873	0.999757
YGL201C	22.0149	0.181907	0.791476	0.229833	0.818222	0.999757
YGR138C	6.76459	-0.505729	1.41019	-0.358623	0.719877	0.999757
YGR134W	18.8585	-0.0364502	0.851497	-0.0428072	0.965855	0.999757
YGR135W	1.2748	0.0819289	4.09616	0.0200014	0.984042	0.999757
YGR142W	5.99141	-0.258918	1.48354	-0.174527	0.861451	0.999757
YGL206C	26.5768	0.513415	0.72251	0.710599	0.477333	0.999757
YGR140W	6.36814	-0.375693	1.44037	-0.260831	0.794223	0.999757
YGR141W	19.5683	-0.775213	0.870156	-0.89089	0.372988	0.999757
YJL082W	17.9306	0.675131	0.850271	0.794019	0.427185	0.999757
YIL051C	1.01708	0.623191	4.65075	0.133998	0.893404	0.999757
YGR144W	9.30036	-0.00645238	1.16337	-0.00554626	0.995575	0.999757
YGR145W	4.7166	-0.355825	1.7346	-0.205134	0.837467	0.999757
YGL196W	12.7204	0.518028	0.988839	0.523875	0.600365	0.999757
YGL197W	12.5816	0.552464	1.00439	0.55005	0.582285	0.999757
YIL054W	27.808	0.108206	0.713769	0.151598	0.879504	0.999757
YIL053W	11.1899	-0.103002	1.09622	-0.093961	0.92514	0.999757
YDR524C	9.33808	0.853306	1.14005	0.74848	0.454171	0.999757
YDR523C	10.1728	-0.182458	1.15043	-0.1586	0.873984	0.999757
YDR524C-B	2.49011	0.124794	2.68921	0.0464054	0.962987	0.999757
YDR524W-C	1.01708	0.623191	4.65075	0.133998	0.893404	0.999757
YDR527W	12.5657	-0.903046	1.0655	-0.847534	0.396698	0.999757
YDR525W-A	17.7027	-0.0563489	0.872067	-0.0646153	0.94848	0.999757
YDR529C	0.699846	1.67103	5.94183	0.281231	0.778533	0.999757
YDR528W	8.26945	0.262183	1.21992	0.214918	0.829831	0.999757
YDR531W	4.70277	0.27924	1.70954	0.163342	0.870249	0.999757
YDR530C	20.3692	0.356195	0.813571	0.437816	0.661519	0.999757
YPR072W	5.21822	0.0394024	1.59708	0.0246715	0.980317	0.999757
YLR070C	11.733	-0.77594	1.08976	-0.712029	0.476447	0.999757
YPR066W	9.65322	-1.65683	1.31035	-1.26441	0.206082	0.999757
YPR067W	5.08538	0.624759	1.5987	0.390792	0.695951	0.999757
YPR068C	16.184	-0.220444	0.912367	-0.241618	0.809076	0.999757
YBR128C	8.26357	-0.0688985	1.25981	-0.0546897	0.956386	0.999757
YNL023C	14.3262	0.231231	0.945666	0.244516	0.806831	0.999757
YJL062W	16.9869	-1.43699	0.980527	-1.46553	0.142778	0.999757
YJL061W	1.34814	-3.05737	4.46875	-0.684165	0.493871	0.999757
YOR258W	1.71692	1.08011	3.35381	0.322053	0.747412	0.999757
YOR259C	8.46768	0.202175	1.20656	0.167563	0.866927	0.999757
YJL069C	8.39434	0.544058	1.20037	0.453241	0.650375	0.999757
YJL068C	8.67386	-0.551526	1.23874	-0.445233	0.656151	0.999757
YJL071W	6.83205	-1.75097	1.56332	-1.12003	0.2627	0.999757
YJL070C	16.9136	0.678152	0.870864	0.778712	0.436149	0.999757
YJL063C	2.10749	-0.918012	3.08423	-0.297647	0.765973	0.999757
YJL062W-A	2.68833	-0.0483422	2.79721	-0.0172823	0.986211	0.999757
YJL066C	14.1796	0.632903	0.939326	0.673784	0.500449	0.999757
YJL065C	7.49834	-0.680285	1.40488	-0.48423	0.628223	0.999757
YNL238W	6.96489	-2.8837	1.85673	-1.5531	0.120399	0.999757
YNL239W	12.0285	-0.0129571	1.03441	-0.0125261	0.990006	0.999757
YNL240C	10.369	0.570538	1.08613	0.525295	0.599378	0.999757
YJR105W	1.91515	0.756928	3.41167	0.221865	0.824419	0.999757
YDR200C	9.86149	0.165217	1.12596	0.146734	0.883342	0.999757
YDR198C	8.77695	0.727048	1.17149	0.62062	0.53485	0.999757
YNL244C	4.38554	0.441617	1.77708	0.248508	0.803742	0.999757
YNL245C	1.90927	-0.724676	3.26222	-0.222142	0.824203	0.999757
YDR195W	5.02588	0.647552	1.61013	0.402174	0.687556	0.999757
YJR108W	11.0847	-0.367282	1.09033	-0.336852	0.736228	0.999757
YDR197W	3.18407	-0.37641	2.26822	-0.165949	0.868197	0.999757
YDR196C	2.99968	-1.53242	2.55073	-0.600777	0.547989	0.999757
YDR191W	8.67386	-0.551526	1.23874	-0.445233	0.656151	0.999757
YDR190C	3.94342	0.0257586	1.93318	0.0133245	0.989369	0.999757
YDR194C	2.68245	-1.34431	2.70333	-0.497279	0.618992	0.999757
YDR192C	6.99465	0.295289	1.33143	0.221784	0.824482	0.999757
YAL046C	3.11073	0.58461	2.26479	0.25813	0.796307	0.999757
YAL044W-A	2.99968	-1.53242	2.55073	-0.600777	0.547989	0.999757
YAL048C	17.7978	0.83863	0.851021	0.98544	0.324408	0.999757
YAL047C	9.21319	0.612692	1.15529	0.530337	0.595878	0.999757
YDR435C	9.88916	-0.45443	1.16419	-0.39034	0.696285	0.999757
YDR434W	5.60879	-0.689855	1.58311	-0.435758	0.663012	0.999757
YAL044C	9.18136	0.0151485	1.18289	0.0128063	0.989782	0.999757
YAL043C	23.9618	0.457186	0.768146	0.595181	0.551722	0.999757
YNL066W	15.7418	-0.357923	0.929486	-0.385076	0.700181	0.999757
YDR428C	10.0459	0.397047	1.1112	0.357315	0.720856	0.999757
YDR432W	3.12457	-0.34497	2.29557	-0.150277	0.880546	0.999757
YDR430C	17.9424	-0.620791	0.917319	-0.676745	0.498568	0.999757
YDR424C	3.3605	1.94758	2.13131	0.913793	0.360826	0.999757
YDR423C	8.44588	-5.70083	2.30476	-2.47351	0.0133795	0.999757
YDR427W	2.04211	-3.64673	3.57583	-1.01983	0.307811	0.999757
YDR425W	12.1454	0.63425	1.00823	0.629071	0.529302	0.999757
YNL256W	4.20703	0.52122	1.85363	0.281189	0.778566	0.999757
YNL257C	28.8251	-1.00502	0.741741	-1.35495	0.175432	0.999757
YPL257W	3.69364	-1.87041	2.32878	-0.80317	0.421877	0.999757
YOR025W	9.60169	1.02924	1.12571	0.914302	0.360558	0.999757
YNL264C	9.38166	-1.10846	1.24433	-0.89081	0.373031	0.999757
YNL265C	8.50746	0.210918	1.26167	0.167174	0.867233	0.999757
YNL262W	28.365	0.720083	0.695888	1.03477	0.300777	0.999757
YFL024C	25.3892	0.313094	0.73793	0.424287	0.671357	0.999757
YNL260C	0.957574	0.7601	5.23538	0.145185	0.884565	0.999757
YLR429W	20.2443	0.238256	0.817253	0.291533	0.770644	0.999757
YNL281W	5.43029	-0.640421	1.63359	-0.392033	0.695034	0.999757
YNL259C	3.62619	0.208994	2.03143	0.10288	0.918058	0.999757
YER038W-A	1.01708	0.623191	4.65075	0.133998	0.893404	0.999757
YER038C	4.76815	0.789373	1.66286	0.474709	0.634995	0.999757
YPL004C	19.3819	-0.410647	0.856509	-0.479443	0.631623	0.999757
YER039C	5.33723	0.000489077	1.60621	0.000304492	0.999757	0.999757
YER035W	7.37933	-0.65485	1.37541	-0.476112	0.633995	0.999757
YER034W	16.2514	-0.6239	0.931181	-0.67001	0.502852	0.999757
YER037W	9.24882	-0.673849	1.21052	-0.556659	0.57776	0.999757
YER036C	10.6347	-0.00542802	1.09211	-0.00497023	0.996034	0.999757
YOR283W	6.87564	0.325614	1.33892	0.243191	0.807857	0.999757
YER041W	13.4797	0.574579	0.962588	0.596911	0.550567	0.999757
YER040W	6.91542	0.336761	1.4161	0.237809	0.812029	0.999757
YPL071C	4.45887	-0.239482	1.79033	-0.133764	0.893589	0.999757
YPL258C	10.8924	-0.0580435	1.08294	-0.0535979	0.957256	0.999757
YPR065W	5.85268	-0.199735	1.50974	-0.132298	0.894749	0.999757
YPL075W	4.21498	-0.919498	1.94244	-0.473372	0.635948	0.999757
YDR043C	4.47271	-1.02846	1.88793	-0.544756	0.585922	0.999757
YOR276W	4.5381	-0.292185	1.83586	-0.159155	0.873547	0.999757
YNL024C	25.5815	0.189898	0.738689	0.257075	0.797121	0.999757
YOR286W	9.61171	-0.385449	1.17351	-0.328458	0.742565	0.999757
YNL282W	5.43029	-0.640421	1.63359	-0.392033	0.695034	0.999757
YML075C	20.2661	-0.188334	0.831713	-0.226441	0.820859	0.999757
YML054C	27.1002	0.26719	0.719034	0.371596	0.710193	0.999757
YML055W	2.61707	-4.00468	3.17506	-1.26129	0.207204	0.999757
YPL047W	6.0945	1.46737	1.41866	1.03433	0.300981	0.999757
YLR363C	3.4418	-0.532459	2.16613	-0.245811	0.805828	0.999757
YOL053W	11.0014	-1.87412	1.27153	-1.4739	0.140508	0.999757
YPR032W	8.88212	1.00439	1.19499	0.840506	0.400625	0.999757
YML059C	27.3261	0.0389539	0.721147	0.0540166	0.956922	0.999757
YML060W	4.03059	-2.02755	2.2352	-0.907097	0.364355	0.999757
YML061C	5.99729	0.207282	1.49639	0.138521	0.889828	0.999757
YML077W	2.734	0.911118	2.44121	0.373223	0.708982	0.999757
YML056C	14.2806	0.0382689	0.968053	0.0395318	0.968466	0.999757
YML057W	16.8956	0.198701	0.913308	0.217562	0.82777	0.999757
YML058W	3.4418	-0.532459	2.16613	-0.245811	0.805828	0.999757
YOR310C	4.96049	0.154355	1.64842	0.0936383	0.925396	0.999757
YBR123C	6.24914	-0.34601	1.45546	-0.237733	0.812088	0.999757
YBR125C	10.1251	0.366448	1.10928	0.330347	0.741138	0.999757
YBR126C	8.40818	0.214368	1.21466	0.176484	0.859914	0.999757
YBR126W-A	12.3	-0.310829	1.03594	-0.300044	0.764144	0.999757
YBR119W	3.4418	-0.532459	2.16613	-0.245811	0.805828	0.999757
YBR122C	1.84976	-0.672695	3.31235	-0.203087	0.839067	0.999757
YOR228C	12.0562	-0.538482	1.06376	-0.506205	0.612713	0.999757
YHR082C	26.4775	0.51468	0.726158	0.708771	0.478466	0.999757
YBR127C	2.68245	-1.34431	2.70333	-0.497279	0.618992	0.999757
YJL168C	15.3039	0.280835	0.973148	0.288584	0.7729	0.999757
YHR211W	12.2347	-0.561026	1.0534	-0.532585	0.594321	0.999757
YER124C	6.51482	-1.67353	1.59033	-1.05232	0.292655	0.999757
YER123W	18.0119	0.221061	0.857409	0.257824	0.796542	0.999757
YPL054W	9.30625	0.282296	1.17307	0.240646	0.809829	0.999757
YLR362W	16.2355	0.1312	0.897974	0.146106	0.883837	0.999757
YOL051W	5.3054	-1.32946	1.73914	-0.764435	0.444608	0.999757
YNL073W	6.44148	-0.947533	1.48587	-0.637695	0.523672	0.999757
YER115C	1.72488	-3.40525	3.89362	-0.874571	0.381807	0.999757
YER118C	5.91218	-0.216483	1.51736	-0.14267	0.886551	0.999757
YER120W	4.31808	1.66098	1.78802	0.928953	0.352913	0.999757
YER119C	24.9927	0.353636	0.747369	0.473174	0.636089	0.999757
YER122C	1.09042	-2.74969	4.98424	-0.551677	0.58117	0.999757
YER121W	6.92926	-0.0824955	1.37454	-0.0600167	0.952142	0.999757
YDR099W	2.60911	0.0386099	2.55921	0.0150867	0.987963	0.999757
YAR007C	1.65154	-0.44081	3.57506	-0.123301	0.901868	0.999757
YMR174C	3.64002	-0.647708	2.1116	-0.306738	0.759043	0.999757
YJL170C	7.60316	-0.302305	1.35593	-0.22295	0.823574	0.999757
YPL053C	14.017	-0.120403	0.967025	-0.124509	0.900913	0.999757
YOL052C	18.4997	-1.31466	0.93103	-1.41205	0.157935	0.999757
YNL074C	6.8836	-0.532511	1.3894	-0.383268	0.701521	0.999757
YMR205C	14.2986	0.616842	0.943248	0.653955	0.513141	0.999757
YMR204C	3.05918	-1.56087	2.53156	-0.616565	0.537521	0.999757
YMR203W	1.77642	0.998564	3.295	0.303054	0.761849	0.999757
YMR202W	2.62295	-1.31077	2.75577	-0.475645	0.634327	0.999757
YMR201C	10.5693	-0.26872	1.11103	-0.241866	0.808884	0.999757
YMR200W	2.10749	-0.918012	3.08423	-0.297647	0.765973	0.999757
YMR199W	9.38166	-1.10846	1.24433	-0.89081	0.373031	0.999757
YMR198W	12.4052	-0.0757006	1.02983	-0.0735078	0.941402	0.999757
YMR197C	1.39969	1.75093	4.12937	0.42402	0.671552	0.999757
YMR196W	33.6746	-0.0312963	0.652305	-0.047978	0.961734	0.999757
YBR014C	3.19791	-1.64655	2.48493	-0.662614	0.507578	0.999757
YBR015C	10.0023	-0.81324	1.1816	-0.688256	0.491292	0.999757
YMR042W	44.0812	-0.355478	0.576316	-0.61681	0.53736	0.999757
YNL277W-A	9.93483	-0.143454	1.13387	-0.126517	0.899323	0.999757
YBR007C	25.4944	0.41337	0.742933	0.556403	0.577935	0.999757
YBR008C	30.4012	-0.496069	0.699025	-0.709658	0.477916	0.999757
YBR009C	0.832687	-2.35848	5.74915	-0.410231	0.681636	0.999757
YBR010W	2.7935	0.863638	2.41617	0.35744	0.720762	0.999757
YBR011C	1.40765	-3.11463	4.33266	-0.718872	0.47222	0.999757
YBR012W-B	6.12425	-0.857155	1.51988	-0.56396	0.572781	0.999757
YBR012W-A	2.94018	-1.5033	2.58393	-0.58179	0.560708	0.999757
YBR013C	3.83237	-1.94035	2.27312	-0.85361	0.393321	0.999757
YOL048C	3.70541	0.137814	2.0978	0.0656946	0.947621	0.999757
YNL071W	4.13576	-0.869172	1.97409	-0.44029	0.659727	0.999757
YJR065C	9.98049	0.144318	1.13552	0.127094	0.898866	0.999757
YOR302W	0.515457	-1.67883	6.04385	-0.277775	0.781185	0.999757
YPL119C	12.3495	0.787694	1.02107	0.77144	0.440446	0.999757
YPL256C	8.22379	-0.0773342	1.24437	-0.0621472	0.950446	0.999757
YMR030W-A	3.69953	-0.673301	2.07951	-0.323779	0.746105	0.999757
YOL091W	3.63414	-1.84761	2.33232	-0.792176	0.428258	0.999757
YOL092W	9.49859	-0.056019	1.16189	-0.0482139	0.961546	0.999757
YOL089C	12.9584	0.483047	1.00647	0.479944	0.631267	0.999757
YOL090W	8.79493	-2.15371	1.47083	-1.46428	0.143117	0.999757
YNL278W	43.7184	0.258608	0.564893	0.457801	0.647096	0.999757
YOL096C	10.1133	-0.172624	1.14197	-0.151163	0.879847	0.999757
YOL093W	1.84388	-3.49346	3.83847	-0.910118	0.36276	0.999757
YOL094C	2.60911	0.0386099	2.55921	0.0150867	0.987963	0.999757
YAL009W	3.94342	0.0257586	1.93318	0.0133245	0.989369	0.999757
YLR289W	5.98345	0.662615	1.44807	0.457584	0.647251	0.999757
YOL087C	11.5545	-0.753029	1.10608	-0.680808	0.495993	0.999757
YOL088C	1.9231	-3.56824	3.69414	-0.96592	0.334084	0.999757
YNL126W	7.32571	-0.210597	1.31973	-0.159576	0.873215	0.999757
YNL072W	20.857	0.559678	0.801143	0.698599	0.484802	0.999757
YDR059C	4.0088	0.653736	1.87887	0.347941	0.727884	0.999757
YCR033W	32.8498	-0.154693	0.665078	-0.232594	0.816077	0.999757
YPL255W	5.60291	-1.40656	1.7052	-0.824869	0.409446	0.999757
YCR073W-A	7.19494	-1.1369	1.43952	-0.789775	0.429659	0.999757
YPL097W	5.70393	2.21187	1.5016	1.47301	0.140747	0.999757
YDR105C	6.83793	-1.06388	1.46799	-0.72472	0.468624	0.999757
YMR033W	1.65154	-0.44081	3.57506	-0.123301	0.901868	0.999757
YLR417W	8.15633	0.598413	1.25387	0.477253	0.633182	0.999757
YPL194W	7.94427	1.00332	1.22561	0.818627	0.412999	0.999757
YNL083W	10.1192	0.106034	1.11344	0.0952304	0.924132	0.999757
YJL166W	0.257728	-0.771587	6.11444	-0.126191	0.899581	0.999757
YNL127W	15.2721	-0.0926894	0.935917	-0.0990359	0.92111	0.999757
YNL069C	3.18407	-0.37641	2.26822	-0.165949	0.868197	0.999757
YPL064C	7.95429	-0.79645	1.33539	-0.596418	0.550896	0.999757
YBL099W	6.2948	0.122771	1.4264	0.086071	0.93141	0.999757
YBL098W	14.0547	0.47113	0.947008	0.497493	0.618841	0.999757
YOR195W	6.26297	-0.906276	1.52683	-0.593569	0.5528	0.999757
YPL098C	0.957574	0.7601	5.23538	0.145185	0.884565	0.999757
YBL101C	36.0595	-0.0976321	0.632166	-0.15444	0.877262	0.999757
YBL100W-C	5.21822	0.0394024	1.59708	0.0246715	0.980317	0.999757
YBL100W-B	6.29687	-1.60022	1.65849	-0.964863	0.334613	0.999757
YBL100W-A	0.892189	-2.45098	5.54855	-0.441733	0.658682	0.999757
YBL105C	15.4028	0.251125	0.914404	0.274632	0.783599	0.999757
YBL104C	31.6027	-0.363919	0.68113	-0.534288	0.593142	0.999757
YBL103C	6.62587	-0.456239	1.41299	-0.32289	0.746779	0.999757
YBL102W	3.95726	-0.801635	2.00571	-0.399677	0.689394	0.999757
YNR008W	32.7467	-0.533316	0.677061	-0.787693	0.430877	0.999757
YNR007C	5.54929	-0.673711	1.59289	-0.422949	0.672332	0.999757
YDL186W	3.75903	-0.698281	2.06078	-0.338843	0.734728	0.999757
YNL003C	4.58583	-2.21942	2.12991	-1.04203	0.297399	0.999757
YNL128W	13.5551	-0.260892	0.996391	-0.261837	0.793447	0.999757
YNL077W	7.12749	-0.147874	1.34019	-0.110338	0.912141	0.999757
YNR003C	3.23562	1.28033	2.18159	0.586881	0.557284	0.999757
YNR002C	55.2867	0.0143784	0.50661	0.0283816	0.977358	0.999757
YNR006W	6.16991	-0.306015	1.47624	-0.207294	0.83578	0.999757
YNR004W	8.89007	0.417181	1.20816	0.345301	0.729868	0.999757
YLR227C	7.31983	-0.642346	1.36749	-0.469727	0.63855	0.999757
YPL099C	4.89511	-0.415758	1.72873	-0.240499	0.809944	0.999757
YOR017W	6.86976	-0.067996	1.36685	-0.0497465	0.960324	0.999757
YMR028W	3.12457	-0.34497	2.29557	-0.150277	0.880546	0.999757
YOR162C	27.3995	-0.0727615	0.724886	-0.100376	0.920045	0.999757
YLR063W	2.74195	-1.37685	2.6709	-0.5155	0.606204	0.999757
YNL258C	4.59172	-1.06722	1.84958	-0.577004	0.563937	0.999757
YMR171C	14.4096	0.959304	0.949583	1.01024	0.312382	0.999757
YPR058W	5.02	0.133198	1.65334	0.0805634	0.935789	0.999757
YDL185W	10.1926	-0.198057	1.12332	-0.176314	0.860047	0.999757
YDL059C	2.7935	0.863638	2.41617	0.35744	0.720762	0.999757
YDL210W	12.1077	-0.0352987	1.03399	-0.0341383	0.972767	0.999757
YDR052C	2.21854	1.58674	2.84438	0.557852	0.576945	0.999757
YNL067W-B	2.74195	-1.37685	2.6709	-0.5155	0.606204	0.999757
YOR101W	4.64326	0.302474	1.71036	0.176848	0.859628	0.999757
YPL122C	2.54961	0.0807542	2.60275	0.0310265	0.975248	0.999757
YLR226W	2.35138	0.27699	2.74174	0.101027	0.919529	0.999757
YPL211W	2.29984	-3.82011	3.36777	-1.13431	0.256663	0.999757
YOR227W	27.2071	0.0466019	0.727586	0.06405	0.94893	0.999757
YOR018W	19.6597	-0.42807	0.873823	-0.489882	0.624217	0.999757
YKL052C	9.75632	-0.113826	1.15348	-0.098681	0.921392	0.999757
YKL051W	18.1468	-0.445309	0.885552	-0.50286	0.615063	0.999757
YKL054C	1.71692	1.08011	3.35381	0.322053	0.747412	0.999757
YPL059W	1.2748	0.0819289	4.09616	0.0200014	0.984042	0.999757
YKL055C	2.62295	-1.31077	2.75577	-0.475645	0.634327	0.999757
YKL057C	4.84149	0.19717	1.67104	0.117993	0.906073	0.999757
YMR172W	23.4958	-0.087235	0.774756	-0.112597	0.91035	0.999757
YKL059C	9.88916	-0.45443	1.16419	-0.39034	0.696285	0.999757
YJL167W	0.699846	1.67103	5.94183	0.281231	0.778533	0.999757
YPL046C	1.09042	-2.74969	4.98424	-0.551677	0.58117	0.999757
YJR149W	11.7905	0.0205661	1.04786	0.0196268	0.984341	0.999757
YIL137C	27.3559	0.534193	0.70943	0.752989	0.451457	0.999757
YAL051W	39.3982	0.301981	0.595368	0.507217	0.612002	0.999757
YIL102C	1.33431	-0.00456159	4.00537	-0.00113887	0.999091	0.999757
YIL027C	1.90131	2.21015	3.16724	0.697817	0.485292	0.999757
YLR384C	14.3916	0.404437	0.946348	0.427366	0.669113	0.999757
YLR225C	6.89155	-1.76263	1.55911	-1.13054	0.258249	0.999757
YPL101W	4.84149	0.19717	1.67104	0.117993	0.906073	0.999757
YJL171C	7.76783	0.0524242	1.2656	0.0414224	0.966959	0.999757
YJL172W	20.3554	0.491161	0.809524	0.606728	0.544031	0.999757
YPR154W	4.26065	-0.136842	1.85229	-0.0738773	0.941108	0.999757
YPR029C	16.2435	-0.226405	0.910682	-0.24861	0.803663	0.999757
YOR210W	0.257728	-0.771587	6.11444	-0.126191	0.899581	0.999757
YLR397C	2.21854	1.58674	2.84438	0.557852	0.576945	0.999757
YLR398C	14.5027	0.748496	0.931108	0.803877	0.421468	0.999757
YLR399C	4.45092	0.975043	1.74261	0.559531	0.575799	0.999757
YLR401C	17.8632	-0.608569	0.899778	-0.676354	0.498816	0.999757
YNL123W	23.1409	-0.455297	0.794388	-0.573142	0.566549	0.999757
YJL174W	0.257728	-0.771587	6.11444	-0.126191	0.899581	0.999757
YLR395C	2.29188	0.326729	2.77706	0.117653	0.906343	0.999757
YLR396C	13.4558	-0.258156	0.999255	-0.258348	0.796138	0.999757
YIL101C	37.6733	0.407531	0.607819	0.670481	0.502551	0.999757
YJL176C	4.06242	-0.0273081	1.95889	-0.0139406	0.988877	0.999757
YLR403W	5.23206	-0.563641	1.64531	-0.342574	0.731919	0.999757
YLR404W	8.51923	0.808788	1.18616	0.681856	0.49533	0.999757
YPR057W	4.76227	0.25596	1.72206	0.148636	0.881841	0.999757
YPL103C	16.7451	-0.106787	0.895152	-0.119294	0.905042	0.999757
YJL105W	6.18963	-0.330774	1.47233	-0.22466	0.822244	0.999757
YHR158C	16.8918	-0.497029	0.90894	-0.546822	0.584501	0.999757
YHR157W	3.36846	0.384611	2.13533	0.180117	0.85706	0.999757
YDR023W	0.257728	-0.771587	6.11444	-0.126191	0.899581	0.999757
YOR293W	0.257728	-0.771587	6.11444	-0.126191	0.899581	0.999757
YJL104W	0.773185	-2.25923	6.01234	-0.375765	0.707092	0.999757
YHR152W	4.53221	-1.04804	1.86447	-0.562113	0.574039	0.999757
YHR151C	18.0358	-0.818396	0.904697	-0.904607	0.365674	0.999757
YHR150W	14.128	0.266499	0.948747	0.280896	0.778791	0.999757
YHR149C	15.7716	0.538737	0.899221	0.599115	0.549096	0.999757
YHR156C	7.36342	0.899876	1.29415	0.69534	0.486842	0.999757
YHR155W	13.8841	0.105758	0.962828	0.109841	0.912536	0.999757
YHR154W	18.4025	0.0191118	0.85568	0.0223353	0.982181	0.999757
YHR153C	6.30864	-0.360944	1.44499	-0.24979	0.80275	0.999757
YLL024C	13.5749	-0.272356	0.988055	-0.275648	0.782818	0.999757
YLL023C	10.5098	-0.2597	1.11108	-0.233736	0.81519	0.999757
YLL022C	8.77695	0.727048	1.17149	0.62062	0.53485	0.999757
YJL106W	17.4667	-0.561863	0.89963	-0.624549	0.532267	0.999757
YLL019C	3.75107	0.83373	1.96052	0.425259	0.670648	0.999757
YJL094C	18.4938	0.318052	0.867756	0.366522	0.713975	0.999757
YLL018C	4.45887	-0.239482	1.79033	-0.133764	0.893589	0.999757
YLL015W	27.112	-0.630347	0.750421	-0.839991	0.400913	0.999757
YLL014W	1.59203	-0.377001	3.60589	-0.104551	0.916732	0.999757
YJL109C	17.8058	0.548562	0.855157	0.641475	0.521214	0.999757
YLR386W	6.81026	-0.0535553	1.36489	-0.0392379	0.968701	0.999757
YIL161W	1.78438	-3.44991	3.84493	-0.897261	0.369579	0.999757
YPL104W	4.0901	-2.04763	2.21168	-0.925823	0.354538	0.999757
YJL108C	3.25741	-1.67292	2.45178	-0.682328	0.495032	0.999757
YLR178C	4.90895	-1.18357	1.79115	-0.660791	0.508746	0.999757
YLR179C	16.971	-0.510732	0.917423	-0.556702	0.577731	0.999757
YLR176C	7.71421	0.406403	1.29367	0.314147	0.753409	0.999757
YLR177W	9.74248	0.186105	1.13032	0.164648	0.869221	0.999757
YLR182W	1.14196	2.66831	4.70262	0.567409	0.570437	0.999757
YJL111W	2.853	0.816689	2.4401	0.334694	0.737856	0.999757
YLR180W	10.1548	-1.25035	1.21945	-1.02535	0.3052	0.999757
YKR049C	6.15401	1.44449	1.41688	1.01949	0.307971	0.999757
YLR240W	10.2043	0.338138	1.15158	0.293629	0.769041	0.999757
YLR241W	11.7846	-0.221479	1.05147	-0.210637	0.83317	0.999757
YLR185W	0.957574	0.7601	5.23538	0.145185	0.884565	0.999757
YIL031W	27.2569	0.552591	0.730489	0.756467	0.449369	0.999757
YDL181W	3.05918	-1.56087	2.53156	-0.616565	0.537521	0.999757
YNR075C-A	4.14164	-0.0887101	1.87156	-0.0473989	0.962195	0.999757
YMR126C	6.75664	0.357043	1.37464	0.259735	0.795068	0.999757
YLR006C	12.2841	-2.69402	1.36419	-1.97481	0.0482892	0.999757
YJL095W	21.2178	-0.280602	0.81662	-0.343614	0.731137	0.999757
YNR073C	8.27533	0.570581	1.2146	0.469767	0.638521	0.999757
YMR127C	9.72276	0.205082	1.15376	0.177751	0.858918	0.999757
YLL001W	48.5816	-0.549643	0.554556	-0.99114	0.321617	0.999757
YLR001C	57.9117	-0.752819	0.513787	-1.46524	0.142857	0.999757
YLL003W	6.63971	-1.007	1.47227	-0.683981	0.493987	0.999757
YLL002W	7.5101	0.128884	1.28443	0.100343	0.920072	0.999757
YLR004C	14.8119	-0.926015	0.998649	-0.927268	0.353788	0.999757
YLR005W	5.77139	1.22752	1.49377	0.82176	0.411214	0.999757
YLR002C	1.71692	1.08011	3.35381	0.322053	0.747412	0.999757
YLR003C	2.74195	-1.37685	2.6709	-0.5155	0.606204	0.999757
YBR262C	5.01204	1.18327	1.62274	0.72918	0.465892	0.999757
YBR261C	8.01968	-0.387339	1.28039	-0.302517	0.762258	0.999757
YBR260C	19.8022	0.150816	0.827011	0.182363	0.855298	0.999757
YBR259W	17.3519	0.159012	0.899135	0.17685	0.859626	0.999757
YIL111W	6.73692	0.386334	1.36114	0.283832	0.776539	0.999757
YIL112W	16.7451	-0.106787	0.895152	-0.119294	0.905042	0.999757
YOL036W	15.8231	0.858336	0.894409	0.959669	0.337222	0.999757
YBR263W	18.571	0.721699	0.838501	0.860701	0.389403	0.999757
YIL115C	32.4157	0.476147	0.666983	0.713882	0.4753	0.999757
YIL116W	14.0329	-1.10088	1.029	-1.06986	0.284683	0.999757
YIL113W	16.6776	0.238098	0.884936	0.269057	0.787886	0.999757
YIL114C	3.62619	0.208994	2.03143	0.10288	0.918058	0.999757
YIL119C	19.4929	-0.105287	0.840113	-0.125325	0.900267	0.999757
YIL120W	29.1067	-0.519154	0.719873	-0.721174	0.470802	0.999757
YIL117C	5.22618	-1.29122	1.74231	-0.741094	0.458636	0.999757
YIL118W	9.60376	0.226959	1.14012	0.199065	0.842212	0.999757
YMR299C	5.67418	-0.149103	1.52994	-0.0974571	0.922363	0.999757
YOR394C-A	5.60084	0.380749	1.50903	0.252314	0.800798	0.999757
YCR108C	14.9607	0.135656	0.929299	0.145977	0.883939	0.999757
YCR107W	7.68065	0.78654	1.27578	0.616516	0.537554	0.999757
YHL034C	2.92634	-0.201467	2.39168	-0.0842366	0.932868	0.999757
YHL035C	31.3073	0.302126	0.667627	0.452536	0.650883	0.999757
YOR389W	11.7251	-0.21333	1.05456	-0.202293	0.839687	0.999757
YLR221C	2.62295	-1.31077	2.75577	-0.475645	0.634327	0.999757
YHL039W	14.3204	0.0430144	0.951692	0.0451978	0.96395	0.999757
YHL040C	25.4587	-0.250581	0.761225	-0.329181	0.742019	0.999757
YHL036W	22.1477	0.0415625	0.79315	0.0524018	0.958209	0.999757
YHL038C	5.15872	0.0590104	1.60646	0.0367331	0.970698	0.999757
YHL044W	7.31188	0.195445	1.30884	0.149327	0.881296	0.999757
YHL046C	3.68569	0.17916	2.02675	0.0883976	0.929561	0.999757
YHL042W	13.3112	-0.463256	1.00887	-0.459182	0.646104	0.999757
YHL043W	2.66861	-0.00244165	2.54659	-0.000958791	0.999235	0.999757
YJR057W	2.66861	-0.00244165	2.54659	-0.000958791	0.999235	0.999757
YJR058C	8.73336	-0.561924	1.23302	-0.455731	0.648583	0.999757
YJR055W	1.77642	0.998564	3.295	0.303054	0.761849	0.999757
YJR056C	2.29984	-3.82011	3.36777	-1.13431	0.256663	0.999757
YJR053W	17.1516	0.650605	0.882909	0.736888	0.461191	0.999757
YJR054W	9.93483	-0.143454	1.13387	-0.126517	0.899323	0.999757
YJR051W	17.7601	0.401047	0.861314	0.465622	0.641486	0.999757
YJR052W	11.7033	0.508701	1.02837	0.494669	0.620834	0.999757
YDL179W	4.58376	0.325967	1.7238	0.189098	0.850016	0.999757
YDL212W	1.59203	-0.377001	3.60589	-0.104551	0.916732	0.999757
YMR312W	0.699846	1.67103	5.94183	0.281231	0.778533	0.999757
YOL024W	4.96049	0.154355	1.64842	0.0936383	0.925396	0.999757
YJR059W	14.2391	0.624884	0.940089	0.664707	0.506238	0.999757
YJL097W	7.30599	-0.189221	1.37038	-0.138079	0.890178	0.999757
YAL053W	30.9167	0.418372	0.670053	0.624386	0.532374	0.999757
YOR033C	9.24293	-1.07638	1.25086	-0.860509	0.389508	0.999757
YMR121C	9.81582	-0.123838	1.14371	-0.108278	0.913775	0.999757
YPL124W	4.0683	0.624471	1.85913	0.335895	0.73695	0.999757
YLR220W	6.2353	0.139163	1.42479	0.0976723	0.922192	0.999757
YOR153W	23.1727	-0.183307	0.785787	-0.233278	0.815545	0.999757
YOR152C	1.14992	-2.82045	4.82416	-0.584652	0.558782	0.999757
YOR151C	8.65207	0.467439	1.18456	0.39461	0.693131	0.999757
YNL200C	2.10749	-0.918012	3.08423	-0.297647	0.765973	0.999757
YOR148C	0.257728	-0.771587	6.11444	-0.126191	0.899581	0.999757
YOR147W	2.16699	-0.961913	3.03084	-0.317376	0.750959	0.999757
YOR145C	0.832687	-2.35848	5.74915	-0.410231	0.681636	0.999757
YOR144C	11.7984	-0.495654	1.07013	-0.463171	0.643242	0.999757
YML053C	6.41969	0.500789	1.38988	0.360311	0.718615	0.999757
YMR124W	16.6717	0.076898	0.892508	0.0861594	0.93134	0.999757
YCL048W	15.847	-0.170445	0.924448	-0.184375	0.853719	0.999757
YOL095C	9.02084	0.947269	1.15458	0.820447	0.411961	0.999757
YMR125W	9.78815	0.461637	1.12645	0.409815	0.681942	0.999757
YMR301C	11.5407	-0.451493	1.077	-0.419213	0.675061	0.999757
YJL098W	24.0788	-0.393942	0.777647	-0.506582	0.612448	0.999757
YGR116W	20.2523	-0.038997	0.824154	-0.0473176	0.96226	0.999757
YGR113W	4.82765	0.764335	1.65661	0.461385	0.644522	0.999757
YLR390W	4.64915	0.841404	1.72567	0.487581	0.625846	0.999757
YGR117C	4.92278	-2.3449	2.05766	-1.1396	0.254454	0.999757
YGR120C	0.574959	-1.82025	6.03499	-0.301617	0.762944	0.999757
YGR119C	10.8568	0.945155	1.07135	0.882207	0.377665	0.999757
YGR121W-A	23.5097	-0.217303	0.778799	-0.279023	0.780227	0.999757
YGR121C	33.395	0.240122	0.65277	0.36785	0.712985	0.999757
YGR123C	18.3907	-0.296113	0.880803	-0.336186	0.736731	0.999757
YGR122W	12.3457	-0.0676396	1.0262	-0.0659128	0.947447	0.999757
YPL196W	5.80495	0.725145	1.58804	0.456628	0.647939	0.999757
YPL198W	3.81853	-0.722881	2.05418	-0.351907	0.724908	0.999757
YPL190C	4.90099	0.175597	1.65425	0.106149	0.915464	0.999757
YPL191C	7.76783	0.0524242	1.2656	0.0414224	0.966959	0.999757
YPL193W	2.47627	1.2093	2.61228	0.462929	0.643415	0.999757
YGR146C-A	7.28212	-2.95094	1.83896	-1.60468	0.108565	0.999757
YGR146C	6.87771	-1.0578	1.45926	-0.724887	0.468521	0.999757
YGR148C	5.5275	0.888128	1.50957	0.588334	0.556308	0.999757
YGR147C	6.16991	-0.306015	1.47624	-0.207294	0.83578	0.999757
YGR150C	3.49335	1.03966	2.05905	0.504922	0.613613	0.999757
YGR149W	6.31659	-1.61764	1.60695	-1.00665	0.314103	0.999757
YGR153W	6.42557	0.88441	1.38388	0.639078	0.522772	0.999757
YGR152C	7.5319	-1.22844	1.40138	-0.876596	0.380706	0.999757
YGR155W	3.11661	1.37274	2.26668	0.605618	0.544769	0.999757
YGR154C	8.85825	-0.228752	1.20267	-0.190204	0.849149	0.999757
YIL057C	8.8662	-1.00536	1.26547	-0.794455	0.42693	0.999757
YIL060W	4.38554	0.441617	1.77708	0.248508	0.803742	0.999757
YLR034C	9.52038	-1.13957	1.2519	-0.910272	0.362679	0.999757
YLR035C	13.4441	-0.738484	1.02231	-0.722367	0.470069	0.999757
YJL092W	13.7374	0.525964	0.954563	0.551	0.581634	0.999757
YJL093C	15.3454	-0.301778	0.939351	-0.321262	0.748012	0.999757
YEL063C	15.7041	0.873663	0.897036	0.973944	0.330084	0.999757
YEL062W	12.0641	-1.15905	1.11203	-1.04228	0.297284	0.999757
YEL061C	15.2938	-0.730583	0.96397	-0.75789	0.448517	0.999757
YEL060C	20.8549	-0.398826	0.834887	-0.477701	0.632863	0.999757
YEL067C	28.603	-0.265908	0.711795	-0.373574	0.708722	0.999757
YEL066W	17.6452	-0.577621	0.899657	-0.642046	0.520843	0.999757
YEL065W	20.3177	0.0924064	0.8213	0.112512	0.910417	0.999757
YEL064C	8.41613	-0.491689	1.25085	-0.393084	0.694257	0.999757
YPR069C	4.0683	0.624471	1.85913	0.335895	0.73695	0.999757
YPR088C	2.60323	-1.27461	2.8403	-0.448759	0.653606	0.999757
YDR502C	11.2612	0.371178	1.05037	0.35338	0.723804	0.999757
YEL059C-A	0.515457	-1.67883	6.04385	-0.277775	0.781185	0.999757
YEL058W	2.92634	-0.201467	2.39168	-0.0842366	0.932868	0.999757
YPR020W	1.47303	-0.237319	4.12416	-0.0575435	0.954112	0.999757
YJL072C	2.86096	-1.44008	2.6593	-0.541526	0.588145	0.999757
YJL073W	15.3374	0.0834476	0.922642	0.0904442	0.927934	0.999757
YML067C	4.32015	-0.160694	1.86216	-0.086294	0.931233	0.999757
YOR238W	9.72276	0.205082	1.15376	0.177751	0.858918	0.999757
YOR246C	4.7979	-4.88417	2.54609	-1.9183	0.0550727	0.999757
YOR245C	4.48655	-2.20529	2.16993	-1.01629	0.30949	0.999757
YOR244W	1.65154	-0.44081	3.57506	-0.123301	0.901868	0.999757
YJL200C	19.3262	0.19518	0.886699	0.22012	0.825778	0.999757
YJL079C	12.8809	-0.168569	1.01672	-0.165797	0.868316	0.999757
YJL100W	16.7233	0.398927	0.884476	0.451032	0.651967	0.999757
YJL077W-B	2.16699	-0.961913	3.03084	-0.317376	0.750959	0.999757
YJL078C	56.1789	-0.573066	0.517265	-1.10788	0.267915	0.999757
YJL077W-A	2.99173	0.664491	2.30533	0.288241	0.773162	0.999757
YJL077C	35.4192	-0.141531	0.637603	-0.221973	0.824335	0.999757
YJL074C	13.6641	0.731914	0.955638	0.76589	0.443742	0.999757
YJL076W	22.7742	0.228367	0.780092	0.292744	0.769718	0.999757
YLR102C	3.06507	-0.312542	2.34408	-0.133333	0.89393	0.999757
YDL199C	4.8792	1.8149	1.66753	1.08837	0.27643	0.999757
YPR063C	2.92634	-0.201467	2.39168	-0.0842366	0.932868	0.999757
YPR021C	9.30625	0.282296	1.17307	0.240646	0.809829	0.999757
YJL194W	3.36846	0.384611	2.13533	0.180117	0.85706	0.999757
YDR436W	17.9088	-0.424372	0.883264	-0.480459	0.630901	0.999757
YDR437W	4.83561	-0.395871	1.72142	-0.229967	0.818117	0.999757
YDR438W	6.58816	-2.80168	1.88536	-1.48601	0.137276	0.999757
YDR439W	0.699846	1.67103	5.94183	0.281231	0.778533	0.999757
YDR440W	11.1045	-0.380697	1.10825	-0.34351	0.731214	0.999757
YDR441C	5.47595	-0.0670615	1.5534	-0.0431708	0.965565	0.999757
YDR443C	21.1642	-0.136878	0.820715	-0.166779	0.867544	0.999757
YDR444W	12.8809	-0.168569	1.01672	-0.165797	0.868316	0.999757
YDR446W	4.26653	0.493857	1.80994	0.272858	0.784962	0.999757
YGL092W	5.85268	-0.199735	1.50974	-0.132298	0.894749	0.999757
YGL091C	1.84976	-0.672695	3.31235	-0.203087	0.839067	0.999757
YGL090W	5.15872	0.0590104	1.60646	0.0367331	0.970698	0.999757
YGL097W	5.65446	-0.121135	1.56646	-0.0773302	0.938361	0.999757
YGL096W	11.2176	-0.689825	1.10637	-0.623502	0.532955	0.999757
YGL095C	4.67094	-1.1109	1.87487	-0.59252	0.553502	0.999757
YGL094C	27.5244	0.0218861	0.722387	0.0302969	0.97583	0.999757
YER014W	4.83561	-0.395871	1.72142	-0.229967	0.818117	0.999757
YER014C-A	1.46715	-3.16943	4.24708	-0.746263	0.455509	0.999757
YDR170C	16.2435	-0.226405	0.910682	-0.24861	0.803663	0.999757
YDR170W-A	7.64294	-0.295448	1.29727	-0.227745	0.819844	0.999757
YLR439W	3.95726	-0.801635	2.00571	-0.399677	0.689394	0.999757
YLR440C	3.4418	-0.532459	2.16613	-0.245811	0.805828	0.999757
YLR438W	26.7968	0.188632	0.721916	0.261294	0.793866	0.999757
YDR165W	3.89775	-0.778184	2.03881	-0.381684	0.702696	0.999757
YDR166C	10.4641	-0.563908	1.14015	-0.494589	0.62089	0.999757
YDR163W	4.59172	-1.06722	1.84958	-0.577004	0.563937	0.999757
YDR164C	8.60052	-0.166245	1.2152	-0.136804	0.891186	0.999757
YDR169C	3.19791	-1.64655	2.48493	-0.662614	0.507578	0.999757
YER011W	4.7166	-0.355825	1.7346	-0.205134	0.837467	0.999757
YDR167W	1.59203	-0.377001	3.60589	-0.104551	0.916732	0.999757
YDR168W	10.9578	0.183152	1.07657	0.170125	0.864912	0.999757
YPL019C	19.6199	-0.430055	0.85157	-0.505014	0.613549	0.999757
YMR297W	21.4755	-0.305612	0.813746	-0.375562	0.707243	0.999757
YPL216W	15.601	0.21894	0.912714	0.239878	0.810425	0.999757
YPR079W	11.0906	-0.0999751	1.08088	-0.0924938	0.926306	0.999757
YNL267W	8.95546	0.688078	1.17511	0.585546	0.558181	0.999757
YNL194C	4.96049	0.154355	1.64842	0.0936383	0.925396	0.999757
YLR069C	10.6942	-0.0147182	1.09066	-0.0134948	0.989233	0.999757
YPL005W	0.699846	1.67103	5.94183	0.281231	0.778533	0.999757
YMR321C	0.892189	-2.45098	5.54855	-0.441733	0.658682	0.999757
YLR353W	14.4591	0.0170523	0.948498	0.0179782	0.985656	0.999757
YMR318C	17.7622	-0.0619858	0.871959	-0.0710879	0.943328	0.999757
YMR319C	14.11	-0.359078	1.00928	-0.355775	0.722009	0.999757
YMR316C-A	3.06507	-0.312542	2.34408	-0.133333	0.89393	0.999757
YMR317W	14.703	0.175615	0.935054	0.187813	0.851023	0.999757
YMR315W-A	1.59203	-0.377001	3.60589	-0.104551	0.916732	0.999757
YLL008W	3.64002	-0.647708	2.1116	-0.306738	0.759043	0.999757
YMR315W	4.57788	-0.283002	1.78504	-0.158541	0.874031	0.999757
YDR299W	4.39349	-0.981666	1.9026	-0.515959	0.605883	0.999757
YDR300C	5.39466	1.43303	1.53243	0.935138	0.349717	0.999757
YDR301W	11.2176	-0.689825	1.10637	-0.623502	0.532955	0.999757
YDR294C	12.0503	-0.824438	1.08007	-0.763321	0.445272	0.999757
YDR295C	4.57199	-1.04303	1.9517	-0.534419	0.593052	0.999757
YDR296W	2.42472	-1.1657	2.84933	-0.409112	0.682458	0.999757
YDR297W	16.394	0.0985758	0.938514	0.105034	0.916349	0.999757
YMR013C	5.21822	0.0394024	1.59708	0.0246715	0.980317	0.999757
YLR423C	1.77642	0.998564	3.295	0.303054	0.761849	0.999757
YMR011W	12.9542	-0.420652	1.03216	-0.407546	0.683607	0.999757
YMR012W	18.5035	-0.493829	0.886825	-0.55685	0.57763	0.999757
YDR302W	1.8636	-3.52682	3.80389	-0.927162	0.353843	0.999757
YDR303C	7.07387	0.253075	1.33366	0.18976	0.849497	0.999757
YMR006C	23.593	-1.11494	0.823484	-1.35393	0.17576	0.999757
YLR422W	16.3486	-0.0510628	0.912975	-0.0559301	0.955397	0.999757
YPR147C	8.73336	-0.561924	1.23302	-0.455731	0.648583	0.999757
YCL058C	6.41969	0.500789	1.38988	0.360311	0.718615	0.999757
YLR354C	4.97433	-0.463479	1.6867	-0.274784	0.783482	0.999757
YOL044W	4.52633	-2.2017	2.12815	-1.03456	0.300873	0.999757
YLR424W	5.91807	0.254938	1.46296	0.174262	0.86166	0.999757
YCL001W-B	13.6205	-0.0536583	0.978193	-0.0548546	0.956254	0.999757
YER113C	22.669	0.111999	0.781856	0.143247	0.886095	0.999757
YER114C	26.4519	-0.709956	0.757393	-0.937368	0.348569	0.999757
YER110C	11.7846	-0.221479	1.05147	-0.210637	0.83317	0.999757
YER111C	19.3244	0.624686	0.828082	0.754378	0.450622	0.999757
YER104W	3.30896	0.41888	2.1525	0.194602	0.845705	0.999757
YER105C	28.7794	0.0299676	0.701277	0.0427329	0.965914	0.999757
YER106W	3.30896	0.41888	2.1525	0.194602	0.845705	0.999757
YER107C	2.41677	1.26919	2.67877	0.473797	0.635645	0.999757
YPL034W	2.68245	-1.34431	2.70333	-0.497279	0.618992	0.999757
YNL218W	18.0237	0.50731	0.87118	0.582326	0.560347	0.999757
YLR355C	6.78847	1.13716	1.35322	0.840333	0.400722	0.999757
YOL043C	8.01968	-0.387339	1.28039	-0.302517	0.762258	0.999757
YPR025C	2.17288	0.436048	3.16323	0.137849	0.89036	0.999757
YNL217W	13.0653	0.0263286	0.999567	0.02634	0.978986	0.999757
YCL004W	6.04503	-0.82083	1.549	-0.529909	0.596175	0.999757
YNL216W	14.0567	-0.115925	0.980639	-0.118214	0.905898	0.999757
YOL042W	9.03468	0.64978	1.15869	0.560789	0.574942	0.999757
YCL002C	14.4017	-0.617521	0.981084	-0.629426	0.52907	0.999757
YMR228W	7.76783	0.0524242	1.2656	0.0414224	0.966959	0.999757
YMR229C	15.1828	0.80972	0.916763	0.883238	0.377108	0.999757
YMR226C	10.2303	0.613859	1.10035	0.557874	0.57693	0.999757
YMR227C	7.14133	-0.604932	1.36894	-0.441899	0.658562	0.999757
YMR231W	18.2479	0.631048	0.845323	0.746517	0.455355	0.999757
YMR232W	13.1248	0.01862	0.992756	0.0187559	0.985036	0.999757
YMR230W-A	7.94427	1.00332	1.22561	0.818627	0.412999	0.999757
YNL272C	5.35695	-0.03017	1.58643	-0.0190176	0.984827	0.999757
YNL222W	1.72488	-3.40525	3.89362	-0.874571	0.381807	0.999757
YMR233W	6.2353	0.139163	1.42479	0.0976723	0.922192	0.999757
YMR234W	3.77287	-1.9187	2.29629	-0.835564	0.4034	0.999757
YDL175C	7.0282	-0.141876	1.41653	-0.100158	0.920219	0.999757
YPR149W	7.32571	-0.210597	1.31973	-0.159576	0.873215	0.999757
YNL221C	11.511	0.770742	1.03268	0.746353	0.455454	0.999757
YHR022C-A	3.62619	0.208994	2.03143	0.10288	0.918058	0.999757
YOL038C-A	3.30307	-0.437824	2.27005	-0.19287	0.847061	0.999757
YPR026W	25.6033	-0.148575	0.746462	-0.19904	0.842232	0.999757
YBR067C	1.45919	1.62419	3.72683	0.43581	0.662975	0.999757
YBR066C	8.65795	0.753747	1.19681	0.629799	0.528826	0.999757
YHR022C	9.92099	0.154798	1.12908	0.137101	0.890951	0.999757
YBR062C	4.79583	-0.404124	1.79019	-0.225744	0.821401	0.999757
YBR061C	9.92687	0.418578	1.11198	0.376425	0.706601	0.999757
YBR065C	6.2353	0.139163	1.42479	0.0976723	0.922192	0.999757
YBR063C	1.66537	-3.35908	3.97161	-0.845773	0.39768	0.999757
YOR107W	12.1136	0.189762	1.0471	0.181227	0.85619	0.999757
YHR024C	5.84473	0.740483	1.46455	0.505605	0.613134	0.999757
YBR060C	5.41645	-0.0488184	1.56541	-0.0311857	0.975121	0.999757
YBR059C	17.5639	-0.0357072	0.878816	-0.040631	0.96759	0.999757
YOL097W-A	3.95137	-1.98252	2.25174	-0.880442	0.37862	0.999757
YMR072W	3.24946	0.454123	2.19363	0.207019	0.835995	0.999757
YHR023W	30.3061	-0.0797618	0.687528	-0.116013	0.907643	0.999757
YNL271C	14.8794	0.685411	0.918828	0.745962	0.45569	0.999757
YMR071C	3.68776	-4.49041	2.84295	-1.57949	0.114223	0.999757
YMR138W	2.29984	-3.82011	3.36777	-1.13431	0.256663	0.999757
YOL103W-B	2.48422	-1.20258	2.81909	-0.426586	0.669681	0.999757
YOL103W-A	2.48422	-1.20258	2.81909	-0.426586	0.669681	0.999757
YOL103W	8.25561	0.597231	1.23171	0.484878	0.627763	0.999757
YOL102C	1.33431	-0.00456159	4.00537	-0.00113887	0.999091	0.999757
YMR074C	6.56048	-0.974177	1.48262	-0.657066	0.511139	0.999757
YOL100W	9.69093	-0.410917	1.16482	-0.352774	0.724258	0.999757
YHR025W	6.36019	0.518039	1.39135	0.372328	0.709648	0.999757
YOL038W	5.02588	0.647552	1.61013	0.402174	0.687556	0.999757
YNL062C	1.14196	2.66831	4.70262	0.567409	0.570437	0.999757
YMR073C	3.4418	-0.532459	2.16613	-0.245811	0.805828	0.999757
YHR028C	24.3462	0.182047	0.777136	0.234254	0.814788	0.999757
YDR073W	5.3054	-1.32946	1.73914	-0.764435	0.444608	0.999757
YPL020C	6.55253	0.0319157	1.39313	0.0229094	0.981723	0.999757
YMR068W	6.26297	-0.906276	1.52683	-0.593569	0.5528	0.999757
YPR015C	12.994	-0.41657	1.01604	-0.409994	0.68181	0.999757
YHR027C	11.0055	-0.345062	1.11132	-0.310496	0.756183	0.999757
YMR067C	8.6064	0.156762	1.21697	0.128813	0.897505	0.999757
YJR072C	12.8612	-0.156121	1.00729	-0.154991	0.876829	0.999757
YPL149W	2.88068	-1.47327	2.63519	-0.559074	0.576111	0.999757
YNL270C	14.5404	-0.639711	0.979008	-0.653427	0.513481	0.999757
YMR070W	13.2853	-0.728232	1.04825	-0.69471	0.487237	0.999757
YJR073C	8.50331	-1.44405	1.36354	-1.05905	0.289579	0.999757
YMR069W	53.2823	-0.291056	0.523473	-0.55601	0.578204	0.999757
YDL121C	7.70833	0.0653245	1.27249	0.0513361	0.959058	0.999757
YDL001W	28.3771	-0.0353136	0.717147	-0.0492418	0.960727	0.999757
YOL040C	2.62295	-1.31077	2.75577	-0.475645	0.634327	0.999757
YNL065W	15.6031	-0.336232	0.933123	-0.36033	0.7186	0.999757
YMR182W-A	1.59203	-0.377001	3.60589	-0.104551	0.916732	0.999757
YPL173W	2.74195	-1.37685	2.6709	-0.5155	0.606204	0.999757
YMR184W	8.13073	0.311303	1.25615	0.247824	0.804271	0.999757
YNL269W	15.371	-0.119919	0.94722	-0.126601	0.899256	0.999757
YMR183C	6.81821	-1.0452	1.45637	-0.717677	0.472956	0.999757
YDR042C	3.3823	-0.504259	2.1965	-0.229574	0.818423	0.999757
YJR078W	37.4613	-0.256997	0.622506	-0.412842	0.679722	0.999757
YCR034W	4.14164	-0.0887101	1.87156	-0.0473989	0.962195	0.999757
YPR144C	4.7761	-0.375953	1.72348	-0.218136	0.827323	0.999757
YMR179W	6.43353	0.0627845	1.40229	0.0447729	0.964288	0.999757
YPL038W	6.37402	0.0785644	1.41701	0.0554438	0.955785	0.999757
YJR079W	4.7166	-0.355825	1.7346	-0.205134	0.837467	0.999757
YNL064C	9.5363	0.789347	1.12461	0.701888	0.482749	0.999757
YMR292W	4.96049	0.154355	1.64842	0.0936383	0.925396	0.999757
YMR178W	7.88684	0.0268794	1.26625	0.0212275	0.983064	0.999757
YKR096W	38.5994	0.965968	0.620581	1.55655	0.119576	0.999757
YNR017W	2.80145	-1.40867	2.65537	-0.530499	0.595766	0.999757
YMR181C	3.39613	-1.75198	2.45028	-0.715014	0.474601	0.999757
YKR095W-A	6.26505	2.30227	1.49346	1.54157	0.123179	0.999757
YNR013C	23.0101	-0.737513	0.809152	-0.911464	0.362051	0.999757
YNR014W	18.4758	-0.148675	0.860776	-0.172723	0.862869	0.999757
YNR015W	33.5991	0.303763	0.644575	0.471261	0.637454	0.999757
YMR180C	11.0411	-1.87148	1.25419	-1.49218	0.135653	0.999757
YNR009W	4.28832	-2.12878	2.18278	-0.975259	0.329432	0.999757
YKR098C	19.4137	1.28154	0.842468	1.52118	0.128215	0.999757
YNR011C	14.9092	1.55059	0.921017	1.68356	0.0922667	0.999757
YNR012W	9.22703	0.314182	1.15349	0.272375	0.785334	0.999757
YNL277W	20.629	-0.0763582	0.819446	-0.0931828	0.925758	0.999757
YER144C	18.801	-0.518947	0.869949	-0.596525	0.550824	0.999757
YJL181W	15.5198	0.740496	0.904056	0.819082	0.41274	0.999757
YPR145W	35.1396	0.121516	0.633573	0.191795	0.847903	0.999757
YER145C	42.5764	0.192389	0.573885	0.33524	0.737444	0.999757
YKR100C	10.032	0.669732	1.12737	0.594067	0.552467	0.999757
YNL058C	4.0683	0.624471	1.85913	0.335895	0.73695	0.999757
YDR232W	4.90099	0.175597	1.65425	0.106149	0.915464	0.999757
YKR099W	22.2844	1.55233	0.776892	1.99813	0.0457029	0.999757
YER147C	11.5784	0.307328	1.03966	0.295605	0.767532	0.999757
YKR102W	23.5215	1.14411	0.767004	1.49166	0.135789	0.999757
YDR238C	8.65414	-0.53466	1.25311	-0.426668	0.669622	0.999757
YKR101W	25.5636	0.904231	0.73367	1.23248	0.217771	0.999757
YNL275W	12.7342	0.301381	0.996399	0.30247	0.762294	0.999757
YER149C	16.1483	0.483731	0.895621	0.540107	0.589123	0.999757
YDL176W	18.2697	0.188013	0.853341	0.220325	0.825618	0.999757
YML074C	3.23562	1.28033	2.18159	0.586881	0.557284	0.999757
YER150W	1.9231	-3.56824	3.69414	-0.96592	0.334084	0.999757
YCR091W	38.0144	-0.0497503	0.612639	-0.0812065	0.935278	0.999757
YLR336C	10.5693	-0.26872	1.11103	-0.241866	0.808884	0.999757
YKL045W	8.08506	-0.0323389	1.24533	-0.0259683	0.979283	0.999757
YKL046C	11.4137	0.0877327	1.07551	0.0815728	0.934986	0.999757
YKL043W	5.97169	-0.233396	1.53275	-0.152273	0.878972	0.999757
YKL044W	6.75871	-1.03258	1.4575	-0.708459	0.47866	0.999757
YKL049C	2.35727	1.33592	2.95031	0.452809	0.650687	0.999757
YKL050C	24.9094	-0.0928212	0.755643	-0.122837	0.902236	0.999757
YKL047W	13.3368	-0.243522	1.01845	-0.23911	0.811021	0.999757
YKL048C	1.97465	0.686948	3.07816	0.223169	0.823404	0.999757
YOR106W	2.04799	-0.872218	3.17998	-0.274284	0.783866	0.999757
YPL095C	19.2016	0.0855994	0.858895	0.0996623	0.920612	0.999757
YPR159W	7.96606	-0.00779785	1.25754	-0.00620088	0.995052	0.999757
YPL181W	13.3469	0.792982	0.963425	0.823086	0.410459	0.999757
YML011C	4.20115	-0.112936	1.85568	-0.0608596	0.951471	0.999757
YNL274C	4.59172	-1.06722	1.84958	-0.577004	0.563937	0.999757
YDL103C	0.957574	0.7601	5.23538	0.145185	0.884565	0.999757
YLR079W	1.40765	-3.11463	4.33266	-0.718872	0.47222	0.999757
YNL130C-A	3.06507	-0.312542	2.34408	-0.133333	0.89393	0.999757
YNL061W	11.2553	0.136837	1.06949	0.127946	0.898192	0.999757
YNR001C	40.5422	-0.579183	0.608049	-0.952527	0.34083	0.999757
YPL021W	3.75903	-0.698281	2.06078	-0.338843	0.734728	0.999757
YMR035W	2.16699	-0.961913	3.03084	-0.317376	0.750959	0.999757
YPL094C	7.76783	0.0524242	1.2656	0.0414224	0.966959	0.999757
YNL001W	6.42764	-0.390369	1.44138	-0.27083	0.786522	0.999757
YOR123C	8.2179	-0.440463	1.26129	-0.349216	0.726927	0.999757
YPL150W	10.0677	-0.482117	1.14753	-0.420136	0.674386	0.999757
YNL273W	11.9749	0.221673	1.03081	0.215047	0.829731	0.999757
YDR001C	44.4559	-0.165503	0.568207	-0.291272	0.770843	0.999757
YOR215C	4.96845	-1.20101	1.78854	-0.671504	0.5019	0.999757
YMR031C	13.9436	0.0984443	0.959647	0.102584	0.918293	0.999757
YDR002W	0.257728	-0.771587	6.11444	-0.126191	0.899581	0.999757
YNL129W	3.18407	-0.37641	2.26822	-0.165949	0.868197	0.999757
YNL059C	4.18731	0.566666	1.87764	0.301797	0.762807	0.999757
YHR106W	4.96049	0.154355	1.64842	0.0936383	0.925396	0.999757
YMR032W	3.24946	0.454123	2.19363	0.207019	0.835995	0.999757
YHR104W	5.07743	1.64057	1.59622	1.02778	0.304051	0.999757
YHR105W	2.91839	1.62501	2.33783	0.695092	0.486998	0.999757
YHR102W	12.9048	0.686013	0.979917	0.700072	0.483882	0.999757
YHR103W	18.0853	0.0562013	0.861062	0.0652698	0.947959	0.999757
YHR100C	2.36522	-1.12768	2.9027	-0.388493	0.697651	0.999757
YHR101C	2.80734	-0.12927	2.46114	-0.0525242	0.958111	0.999757
YHR098C	17.0385	0.808844	0.866753	0.933189	0.350722	0.999757
YHR099W	40.4609	0.376196	0.586236	0.641713	0.521059	0.999757
YLL006W	2.98377	2.4707	2.5086	0.984889	0.324679	0.999757
YDL190C	24.5129	-0.0556933	0.759227	-0.0733553	0.941523	0.999757
YKR025W	9.10803	3.80027	1.2893	2.94754	0.00320312	0.999757
YLL010C	23.5315	-0.63157	0.796829	-0.792604	0.428009	0.999757
YLL011W	8.47563	-0.502484	1.24638	-0.403155	0.686835	0.999757
YLL012W	19.0529	-0.724203	0.878433	-0.824426	0.409697	0.999757
YPR192W	13.1566	0.442223	0.985789	0.448598	0.653722	0.999757
YMR027W	9.24086	0.00425141	1.17123	0.00362988	0.997104	0.999757
YDL195W	5.27184	-0.556002	1.70239	-0.3266	0.74397	0.999757
YDL197C	14.0765	-0.12736	0.964262	-0.13208	0.894921	0.999757
YDL193W	2.29188	0.326729	2.77706	0.117653	0.906343	0.999757
YDL194W	10.5157	0.0133975	1.1039	0.0121365	0.990317	0.999757
YLL004W	3.06507	-0.312542	2.34408	-0.133333	0.89393	0.999757
YLL005C	14.822	0.161567	0.936822	0.172463	0.863073	0.999757
YLR188W	17.3657	-0.00899358	0.88883	-0.0101184	0.991927	0.999757
YLR187W	17.3934	-0.365002	0.891145	-0.409588	0.682108	0.999757
YLR190W	10.4503	-0.250641	1.11377	-0.225039	0.821949	0.999757
YLR189C	13.2576	-0.22505	0.998002	-0.225501	0.82159	0.999757
YLR192C	1.53253	-0.31036	3.70718	-0.0837187	0.93328	0.999757
YLR191W	5.97757	0.237317	1.4604	0.162502	0.870911	0.999757
YLR194C	5.73956	0.309831	1.52424	0.203269	0.838925	0.999757
YLR193C	3.63414	-1.84761	2.33232	-0.792176	0.428258	0.999757
YLR196W	8.32895	0.249573	1.22302	0.204063	0.838304	0.999757
YOR343W-B	8.10685	-1.3558	1.36746	-0.991473	0.321455	0.999757
YPR041W	5.41645	-0.0488184	1.56541	-0.0311857	0.975121	0.999757
YPL092W	13.8108	0.318011	0.957093	0.332268	0.739687	0.999757
YLR017W	5.17256	-0.545744	1.6687	-0.327048	0.743632	0.999757
YLR016C	5.79906	0.290976	1.49356	0.19482	0.845534	0.999757
YOL062C	4.92278	-2.3449	2.05766	-1.1396	0.254454	0.999757
YLR009W	0.515457	-1.67883	6.04385	-0.277775	0.781185	0.999757
YLR011W	9.56605	-0.735967	1.1954	-0.615668	0.538113	0.999757
YLR013W	2.10161	-3.68438	3.55094	-1.03758	0.299466	0.999757
YLR012C	1.91515	0.756928	3.41167	0.221865	0.824419	0.999757
YLR015W	4.52633	-2.2017	2.12815	-1.03456	0.300873	0.999757
YLR014C	17.9524	0.226921	0.858998	0.26417	0.791649	0.999757
YBR274W	9.04852	0.34904	1.18178	0.295351	0.767726	0.999757
YBR275C	44.888	0.195498	0.559962	0.349128	0.726993	0.999757
YBR276C	18.4758	-0.148675	0.860776	-0.172723	0.862869	0.999757
YJL091C	3.49335	1.03966	2.05905	0.504922	0.613613	0.999757
YBR270C	7.20083	-0.617456	1.36425	-0.452596	0.65084	0.999757
YBR271W	13.6482	-0.519113	1.00145	-0.518364	0.604205	0.999757
YBR272C	5.61468	-0.131594	1.55233	-0.0847723	0.932442	0.999757
YBR273C	4.78994	-1.14807	1.8166	-0.63199	0.527393	0.999757
YLR234W	4.14164	-0.0887101	1.87156	-0.0473989	0.962195	0.999757
YPR042C	8.2179	-0.440463	1.26129	-0.349216	0.726927	0.999757
YPL091W	11.4535	0.0940392	1.05378	0.0892397	0.928891	0.999757
YBR279W	4.82765	0.764335	1.65661	0.461385	0.644522	0.999757
YBR280C	17.0166	-0.323202	0.898265	-0.359807	0.718991	0.999757
YGR289C	11.961	0.453956	1.0192	0.445404	0.656028	0.999757
YGR292W	5.09334	-0.500623	1.66789	-0.300153	0.76406	0.999757
YHR013C	3.25741	-1.67292	2.45178	-0.682328	0.495032	0.999757
YGR295C	5.62263	-1.42725	1.68919	-0.844929	0.398151	0.999757
YHR019C	6.66151	1.97251	1.36057	1.44977	0.147124	0.999757
YHL050C	0.574959	-1.82025	6.03499	-0.301617	0.762944	0.999757
YHR017W	16.9969	-0.314413	0.903812	-0.347874	0.727934	0.999757
YHL048C-A	1.90927	-0.724676	3.26222	-0.222142	0.824203	0.999757
YHL048W	6.16991	-0.306015	1.47624	-0.207294	0.83578	0.999757
YHL047C	19.1619	0.082479	0.839574	0.098239	0.921742	0.999757
YPR152C	19.3601	0.0577294	0.83743	0.0689364	0.94504	0.999757
YHR021W-A	8.42201	-0.13196	1.24797	-0.10574	0.915789	0.999757
YLR061W	1.09042	-2.74969	4.98424	-0.551677	0.58117	0.999757
YPL067C	20.9244	0.299857	0.808579	0.370845	0.710753	0.999757
YNL055C	6.96282	-0.56611	1.41131	-0.401125	0.688328	0.999757
YJR066W	55.1065	0.178378	0.504537	0.353548	0.723678	0.999757
YJL090C	13.0812	1.23827	0.969682	1.27698	0.201609	0.999757
YJR068W	3.24946	0.454123	2.19363	0.207019	0.835995	0.999757
YJR067C	0.892189	-2.45098	5.54855	-0.441733	0.658682	0.999757
YJR062C	7.05415	0.280158	1.33729	0.209497	0.83406	0.999757
YJR061W	33.9759	0.279179	0.642332	0.434634	0.663828	0.999757
YJR064W	15.7062	0.384119	0.908177	0.422957	0.672327	0.999757
YJR063W	3.36846	0.384611	2.13533	0.180117	0.85706	0.999757
YLR407W	2.09365	0.562713	2.98749	0.188356	0.850597	0.999757
YLR406C-A	3.88392	0.0524691	1.94476	0.0269797	0.978476	0.999757
YLR406C	3.05123	0.624101	2.2694	0.275007	0.783311	0.999757
YLR405W	6.93514	0.310393	1.33194	0.233038	0.815732	0.999757
YJR070C	4.33192	1.03526	1.85196	0.55901	0.576155	0.999757
YJR069C	4.37758	1.62563	1.76481	0.921136	0.356979	0.999757
YLR409C	14.8932	0.5037	0.925298	0.544365	0.58619	0.999757
YLR408C	2.54961	0.0807542	2.60275	0.0310265	0.975248	0.999757
YOR114W	4.90099	0.175597	1.65425	0.106149	0.915464	0.999757
YOR115C	1.60587	-3.31101	4.09242	-0.809059	0.418481	0.999757
YOR112W	4.73044	-1.12977	1.84077	-0.613747	0.539383	0.999757
YOR113W	4.53221	-1.04804	1.86447	-0.562113	0.574039	0.999757
YOR118W	12.6709	-0.623738	1.04912	-0.594537	0.552153	0.999757
YOR119C	8.81258	-0.588363	1.25114	-0.470262	0.638168	0.999757
YOR116C	10.9439	0.43793	1.06249	0.412174	0.680212	0.999757
YOR117W	4.38554	0.441617	1.77708	0.248508	0.803742	0.999757
YPR153W	9.11009	-0.638805	1.21706	-0.524876	0.59967	0.999757
YDL168W	10.9519	-0.0670298	1.08034	-0.0620452	0.950527	0.999757
YOR120W	12.8947	-0.41323	1.04281	-0.396266	0.691909	0.999757
YOR122C	0.574959	-1.82025	6.03499	-0.301617	0.762944	0.999757
YNL054W-B	12.3021	-1.18686	1.10707	-1.07207	0.283687	0.999757
YJL089W	14.3342	-0.166192	0.958562	-0.173376	0.862356	0.999757
YLR378C	8.77695	0.727048	1.17149	0.62062	0.53485	0.999757
YLR238W	4.21498	-0.919498	1.94244	-0.473372	0.635948	0.999757
YPR049C	16.4735	0.105911	0.902231	0.117388	0.906553	0.999757
YPL089C	10.369	0.570538	1.08613	0.525295	0.599378	0.999757
YNL185C	0.957574	0.7601	5.23538	0.145185	0.884565	0.999757
YLR040C	5.61468	-0.131594	1.55233	-0.0847723	0.932442	0.999757
YPL023C	5.17256	-0.545744	1.6687	-0.327048	0.743632	0.999757
YDL015C	0.574959	-1.82025	6.03499	-0.301617	0.762944	0.999757
YPL139C	2.85889	1.68157	2.39417	0.702359	0.482455	0.999757
YMR295C	5.7278	-0.721738	1.58213	-0.456181	0.64826	0.999757
YHR214C-E	1.90927	-0.724676	3.26222	-0.222142	0.824203	0.999757
YPL140C	9.17548	-0.298921	1.18591	-0.252061	0.800994	0.999757
YPL223C	6.16991	-0.306015	1.47624	-0.207294	0.83578	0.999757
YPL143W	0.773185	-2.25923	6.01234	-0.375765	0.707092	0.999757
YOL165C	2.86684	-0.165893	2.41417	-0.0687162	0.945216	0.999757
YJL088W	11.394	0.102919	1.05363	0.0976805	0.922186	0.999757
YPL148C	1.46715	-3.16943	4.24708	-0.746263	0.455509	0.999757
YPL147W	11.0252	-0.358827	1.09254	-0.328433	0.742585	0.999757
YGR161C	8.97518	0.662424	1.16992	0.566213	0.571249	0.999757
YGR161W-C	5.17256	-0.545744	1.6687	-0.327048	0.743632	0.999757
YIL074C	23.6685	-0.223774	0.792723	-0.282285	0.777725	0.999757
YIL073C	15.5893	-0.13529	0.931875	-0.14518	0.884568	0.999757
YGR156W	7.79551	-0.779755	1.34958	-0.577775	0.563416	0.999757
YGR157W	6.69125	-0.0243959	1.37827	-0.0177004	0.985878	0.999757
YGR158C	4.19319	1.15548	1.8115	0.637857	0.523567	0.999757
YGR159C	4.37758	1.62563	1.76481	0.921136	0.356979	0.999757
YLR019W	15.8806	-0.37916	0.93397	-0.405966	0.684768	0.999757
YLR018C	6.61203	0.0165473	1.39812	0.0118354	0.990557	0.999757
YLR021W	1.45919	1.62419	3.72683	0.43581	0.662975	0.999757
YLR020C	12.9999	-0.183625	1.00388	-0.182916	0.854864	0.999757
YGR161C-D	0.257728	-0.771587	6.11444	-0.126191	0.899581	0.999757
YLR022C	3.94342	0.0257586	1.93318	0.0133245	0.989369	0.999757
YIL070C	1.20942	-2.88779	4.73552	-0.609815	0.541985	0.999757
YLR024C	50.3003	-0.0589913	0.551892	-0.106889	0.914877	0.999757
YPR005C	7.89272	0.364691	1.24341	0.2933	0.769293	0.999757
YPR006C	25.2861	-0.122946	0.750041	-0.163919	0.869795	0.999757
YPR003C	14.5127	-0.186409	0.95851	-0.194478	0.845802	0.999757
YOR298C-A	10.0794	0.0991427	1.15242	0.08603	0.931443	0.999757
YPR001W	63.7945	-0.428571	0.49092	-0.872997	0.382665	0.999757
YPR002W	44.6977	0.0820116	0.56155	0.146045	0.883886	0.999757
YPL002C	5.16667	-1.27491	1.74715	-0.729708	0.465569	0.999757
YPL001W	20.7777	-0.885006	0.856506	-1.03327	0.301475	0.999757
YNL151C	8.13661	0.625046	1.21858	0.512931	0.608	0.999757
YOL166W-A	6.2948	0.122771	1.4264	0.086071	0.93141	0.999757
YJL087C	1.52665	-3.22233	4.21041	-0.765326	0.444078	0.999757
YGR171C	5.86652	-0.77593	1.54926	-0.500838	0.616485	0.999757
YNL233W	20.5657	-0.685171	0.860194	-0.79653	0.425724	0.999757
YPR008W	25.421	-0.633088	0.77035	-0.821819	0.41118	0.999757
YPL179W	6.37402	0.0785644	1.41701	0.0554438	0.955785	0.999757
YNL317W	7.07387	0.253075	1.33366	0.18976	0.849497	0.999757
YPR047W	11.2394	1.07227	1.04512	1.02598	0.304902	0.999757
YGL237C	6.11629	0.172358	1.44332	0.119418	0.904945	0.999757
YML116W	12.1752	-0.553566	1.05493	-0.524744	0.599761	0.999757
YPR010C-A	2.09365	0.562713	2.98749	0.188356	0.850597	0.999757
YPL127C	6.18963	-0.330774	1.47233	-0.22466	0.822244	0.999757
YPL128C	4.70277	0.27924	1.70954	0.163342	0.870249	0.999757
YNL046W	9.74455	-0.763504	1.19444	-0.639213	0.522684	0.999757
YNL314W	6.00732	-5.20555	2.41884	-2.15209	0.0313904	0.999757
YCR020C	10.0359	1.6699	1.11845	1.49305	0.135424	0.999757
YNL052W	2.92634	-0.201467	2.39168	-0.0842366	0.932868	0.999757
YJL085W	6.9431	-0.545659	1.38629	-0.393612	0.693867	0.999757
YNL054W	9.44116	-1.11746	1.24046	-0.900842	0.367672	0.999757
YNL054W-A	6.81821	-1.0452	1.45637	-0.717677	0.472956	0.999757
YNL048W	4.65122	-1.08611	1.84241	-0.589508	0.555521	0.999757
YNL049C	11.4456	0.565643	1.03852	0.544664	0.585985	0.999757
YNL050C	7.90067	-0.363903	1.27982	-0.284338	0.776151	0.999757
YML120C	15.1589	0.10352	0.927436	0.111619	0.911125	0.999757
YGL083W	15.8806	-0.37916	0.93397	-0.405966	0.684768	0.999757
YGL084C	3.30896	0.41888	2.1525	0.194602	0.845705	0.999757
YDR453C	10.26	-0.861316	1.17006	-0.736133	0.46165	0.999757
YDR452W	13.442	-0.0316852	0.982055	-0.0322642	0.974261	0.999757
YDR451C	8.38638	1.15525	1.19262	0.968668	0.332711	0.999757
YGL080W	3.56669	0.239342	2.05467	0.116487	0.907267	0.999757
YDR449C	4.26653	0.493857	1.80994	0.272858	0.784962	0.999757
YDR448W	1.8041	-3.47592	5.97587	-0.58166	0.560796	0.999757
YIL166C	20.8411	-0.245814	0.823702	-0.298426	0.765378	0.999757
YGL077C	15.0538	-0.0768843	0.959683	-0.0801142	0.936146	0.999757
YGL078C	1.71692	1.08011	3.35381	0.322053	0.747412	0.999757
YIL163C	11.2553	0.136837	1.06949	0.127946	0.898192	0.999757
YGR163W	1.77642	0.998564	3.295	0.303054	0.761849	0.999757
YDR458C	8.83853	-0.210682	1.22557	-0.171904	0.863513	0.999757
YDR457W	41.3649	0.449619	0.580197	0.774943	0.438373	0.999757
YDR162C	0.515457	-1.67883	6.04385	-0.277775	0.781185	0.999757
YDR161W	0.257728	-0.771587	6.11444	-0.126191	0.899581	0.999757
YLR060W	6.55253	0.0319157	1.39313	0.0229094	0.981723	0.999757
YGR162W	8.2615	0.895547	1.20312	0.744357	0.456661	0.999757
YLR449W	4.80378	-2.31216	2.0986	-1.10176	0.270564	0.999757
YLR448W	1.59203	-0.377001	3.60589	-0.104551	0.916732	0.999757
YER023W	2.16699	-0.961913	3.03084	-0.317376	0.750959	0.999757
YER022W	8.52718	0.190123	1.20305	0.158035	0.874429	0.999757
YDR152W	3.13045	0.545889	3.78279	0.144308	0.885257	0.999757
YDR151C	8.77902	-0.199516	1.2175	-0.163873	0.869831	0.999757
YER019C-A	2.04211	-3.64673	3.57583	-1.01983	0.307811	0.999757
YDR153C	6.2353	0.139163	1.42479	0.0976723	0.922192	0.999757
YDR158W	3.12457	-0.34497	2.29557	-0.150277	0.880546	0.999757
YDR156W	3.12457	-0.34497	2.29557	-0.150277	0.880546	0.999757
YER016W	4.33399	-0.961246	1.90693	-0.50408	0.614205	0.999757
YER015W	15.4485	0.424881	0.915967	0.46386	0.642748	0.999757
YOR354C	16.3168	-0.429149	0.918858	-0.467046	0.640467	0.999757
YOR355W	2.86684	-0.165893	2.41417	-0.0687162	0.945216	0.999757
YPL133C	22.34	-0.106078	0.79714	-0.133073	0.894136	0.999757
YDL132W	5.21822	0.0394024	1.59708	0.0246715	0.980317	0.999757
YOR348C	191.03	0.104304	0.257675	0.404789	0.685632	0.999757
YOR349W	45.0426	-0.064079	0.565038	-0.113407	0.909708	0.999757
YOR346W	25.2266	-0.11898	0.751338	-0.158357	0.874175	0.999757
YOR347C	4.67094	-1.1109	1.87487	-0.59252	0.553502	0.999757
YOR352W	5.04179	-2.37643	2.03851	-1.16577	0.243709	0.999757
YLR142W	7.45648	0.489939	1.30665	0.374958	0.707692	0.999757
YOR350C	9.42525	0.259688	1.1477	0.226269	0.820992	0.999757
YOR351C	15.4049	-0.308032	0.941719	-0.327095	0.743596	0.999757
YPR179C	19.2888	-0.232577	0.852613	-0.272781	0.785021	0.999757
YPL235W	9.35987	-0.0170278	1.15929	-0.0146881	0.988281	0.999757
YDR313C	3.97109	-2.00691	2.26839	-0.884729	0.376303	0.999757
YDR312W	8.19818	-0.422939	1.31087	-0.322639	0.746969	0.999757
YNL330C	7.04619	1.02263	1.31629	0.776904	0.437215	0.999757
YJL083W	20.2007	-0.331395	0.835952	-0.396428	0.69179	0.999757
YPL234C	0.832687	-2.35848	5.74915	-0.410231	0.681636	0.999757
YDR307W	8.54897	-0.94084	1.28165	-0.734087	0.462896	0.999757
YDR306C	9.04264	0.0560987	1.17502	0.0477428	0.961921	0.999757
YDR305C	8.65414	-0.53466	1.25311	-0.426668	0.669622	0.999757
YDR304C	8.27741	-0.451649	1.26175	-0.357955	0.720377	0.999757
YDR311W	1.79026	-0.618437	3.41195	-0.181256	0.856167	0.999757
YDR310C	20.0143	-0.018794	0.838385	-0.0224169	0.982115	0.999757
YDR309C	8.60052	-0.166245	1.2152	-0.136804	0.891186	0.999757
YDR308C	0.257728	-0.771587	6.11444	-0.126191	0.899581	0.999757
YEL068C	3.69953	-0.673301	2.07951	-0.323779	0.746105	0.999757
YEL069C	15.3374	0.0834476	0.922642	0.0904442	0.927934	0.999757
YMR004W	14.4612	-0.623825	0.981868	-0.635345	0.525203	0.999757
YEL075C	0.257728	-0.771587	6.11444	-0.126191	0.899581	0.999757
YHR076W	4.26653	0.493857	1.80994	0.272858	0.784962	0.999757
YMR003W	7.59728	-0.727953	1.3465	-0.540624	0.588766	0.999757
YEL077C	10.9737	-0.988755	1.14385	-0.864413	0.387361	0.999757
YEL070W	9.17548	-0.298921	1.18591	-0.252061	0.800994	0.999757
YEL071W	20.9639	0.282994	0.824634	0.343175	0.731467	0.999757
YEL072W	17.6293	0.115658	0.868819	0.133121	0.894098	0.999757
YEL073C	2.30572	-1.08803	2.99386	-0.36342	0.716291	0.999757
YNL134C	12.6034	-0.112563	1.01628	-0.110759	0.911807	0.999757
YKL188C	17.0921	0.657558	0.877112	0.749686	0.453444	0.999757
YPL166W	5.41645	-0.0488184	1.56541	-0.0311857	0.975121	0.999757
YDL049C	14.584	0.189762	0.940822	0.201698	0.840153	0.999757
YKL189W	3.49335	1.03966	2.05905	0.504922	0.613613	0.999757
YLR381W	6.97077	-1.79047	1.56566	-1.14359	0.252794	0.999757
YPL236C	12.3675	-0.871374	1.07122	-0.813442	0.415965	0.999757
YLR141W	3.05123	0.624101	2.2694	0.275007	0.783311	0.999757
YNL018C	5.71984	0.342641	1.50243	0.228058	0.819601	0.999757
YER096W	8.20995	0.274805	1.22157	0.224961	0.822009	0.999757
YER095W	6.16196	0.606375	1.42736	0.424823	0.670966	0.999757
YER094C	2.72811	-0.0431844	2.57543	-0.0167678	0.986622	0.999757
YER093C-A	2.54373	-1.23872	2.81168	-0.440561	0.659531	0.999757
YER101C	11.6794	-0.479804	1.0862	-0.441727	0.658686	0.999757
YER100W	2.54961	0.0807542	2.60275	0.0310265	0.975248	0.999757
YER099C	7.74811	0.0745395	1.31674	0.0566093	0.954856	0.999757
YER098W	14.9984	0.669936	0.920613	0.727706	0.466793	0.999757
YLR138W	20.7539	0.0491498	0.813071	0.0604496	0.951798	0.999757
YER103W	15.9639	0.344487	0.901131	0.382283	0.702252	0.999757
YDL239C	6.7428	0.757558	1.34229	0.564377	0.572497	0.999757
YDR076W	16.0729	-0.606977	0.937162	-0.647676	0.517195	0.999757
YLR137W	21.1604	-0.743179	0.839962	-0.884776	0.376277	0.999757
YHR075C	5.87447	-2.61774	1.93997	-1.34937	0.177217	0.999757
YLR136C	5.62263	-1.42725	1.68919	-0.844929	0.398151	0.999757
YLR382C	9.87532	-0.133697	1.13717	-0.11757	0.906409	0.999757
YOR341W	6.18963	-0.330774	1.47233	-0.22466	0.822244	0.999757
YLR048W	0.257728	-0.771587	6.11444	-0.126191	0.899581	0.999757
YLR135W	13.5174	-1.03262	1.04124	-0.991724	0.321332	0.999757
YOL017W	18.4184	-0.661407	0.885739	-0.746729	0.455227	0.999757
YLR049C	5.79318	-0.183018	1.5093	-0.121261	0.903485	0.999757
YMR217W	1.2748	0.0819289	4.09616	0.0200014	0.984042	0.999757
YKL181W	8.01968	-0.387339	1.28039	-0.302517	0.762258	0.999757
YMR219W	25.0879	-0.10489	0.752687	-0.139355	0.88917	0.999757
YMR218C	2.15904	1.66322	2.88466	0.576574	0.564227	0.999757
YMR221C	18.1586	-0.113117	0.866632	-0.130524	0.896152	0.999757
YMR220W	7.93838	0.696207	1.24673	0.558425	0.576554	0.999757
YMR223W	9.42732	-0.70248	1.20506	-0.582943	0.559932	0.999757
YKL182W	23.5394	0.382214	0.762579	0.501212	0.616222	0.999757
YMR225C	3.43592	-1.74901	2.42167	-0.722233	0.470151	0.999757
YMR224C	12.8532	0.284906	0.989995	0.287785	0.773511	0.999757
YOL161C	3.62619	0.208994	2.03143	0.10288	0.918058	0.999757
YFL036W	25.5023	0.200697	0.748649	0.26808	0.788638	0.999757
YIR003W	26.0295	0.357362	0.72903	0.490188	0.624001	0.999757
YOL063C	11.8994	-1.52783	1.19095	-1.28287	0.199537	0.999757
YBR076W	11.0252	-0.358827	1.09254	-0.328433	0.742585	0.999757
YBR077C	0.574959	-1.82025	6.03499	-0.301617	0.762944	0.999757
YBR073W	10.9263	-0.324018	1.16605	-0.277875	0.781108	0.999757
YBR074W	30.7738	0.069335	0.685912	0.101084	0.919484	0.999757
YBR072W	12.189	-0.849962	1.08025	-0.786821	0.431387	0.999757
YBR072C-A	8.66002	-0.177357	1.21231	-0.146297	0.883687	0.999757
YBR070C	1.01708	0.623191	4.65075	0.133998	0.893404	0.999757
YBR071W	5.62263	-1.42725	1.68919	-0.844929	0.398151	0.999757
YBR068C	31.9258	-0.287427	0.676038	-0.425164	0.670717	0.999757
YBR069C	21.085	-0.124971	0.813257	-0.153667	0.877872	0.999757
YOR261C	1.14992	-2.82045	4.82416	-0.584652	0.558782	0.999757
YLR145W	1.77642	0.998564	3.295	0.303054	0.761849	0.999757
YOL105C	11.2691	-0.126145	1.06986	-0.117909	0.90614	0.999757
YOL107W	10.5454	1.2572	1.07189	1.17288	0.240843	0.999757
YOL108C	2.36522	-1.12768	2.9027	-0.388493	0.697651	0.999757
YNL034W	3.18407	-0.37641	2.26822	-0.165949	0.868197	0.999757
YOL110W	33.284	0.0797865	0.654162	0.121967	0.902925	0.999757
YOL111C	7.96606	-0.00779785	1.25754	-0.00620088	0.995052	0.999757
YOL112W	11.7766	0.263791	1.03239	0.255516	0.798324	0.999757
YOL113W	12.6709	-0.623738	1.04912	-0.594537	0.552153	0.999757
YOL114C	3.56876	-4.4478	2.81743	-1.57867	0.114411	0.999757
YIL091C	22.3757	0.624597	0.778954	0.80184	0.422645	0.999757
YFL038C	6.28685	0.963398	1.39801	0.689122	0.490746	0.999757
YNL032W	1.78438	-3.44991	3.84493	-0.897261	0.369579	0.999757
YDL177C	3.58052	-0.621227	2.16098	-0.287475	0.773749	0.999757
YOL057W	13.5015	-0.0390437	0.978804	-0.0398893	0.968181	0.999757
YNL033W	0.832687	-2.35848	5.74915	-0.410231	0.681636	0.999757
YPR114W	9.9151	-0.127357	1.16957	-0.108893	0.913288	0.999757
YDL092W	8.1584	-0.429227	1.26446	-0.339456	0.734267	0.999757
YLR348C	28.0813	0.647095	0.730661	0.88563	0.375817	0.999757
YIL005W	38.9028	0.339571	0.618013	0.549456	0.582693	0.999757
YIL004C	2.21854	1.58674	2.84438	0.557852	0.576945	0.999757
YOR269W	10.0061	0.388123	1.13647	0.341515	0.732716	0.999757
YOR270C	12.7422	-0.140952	1.0104	-0.139501	0.889054	0.999757
YLR047C	14.6355	0.547977	0.929932	0.589266	0.555683	0.999757
YNL025C	8.24766	1.22292	1.22105	1.00153	0.31657	0.999757
[truncated: 3,607 more rows]

## Sheet: 1736
gene	baseMean	log2FoldChange	lfcSE	stat	pvalue	padj
YNL333W	6.18524	-1.10317	1.44217	-0.764934	0.444311	0.999806
YBR257W	7.24674	-0.8518	1.29604	-0.657235	0.51103	0.999806
YPL141C	34.3052	0.302445	0.611681	0.494449	0.620989	0.999806
YBR258C	5.99486	-0.76278	1.45022	-0.525974	0.598906	0.999806
YPR030W	35.0835	0.279806	0.616137	0.454129	0.649736	0.999806
YPL068C	10.1047	1.09866	1.12463	0.976902	0.328618	0.999806
YMR323W	6.87222	-0.132042	1.30954	-0.10083	0.919685	0.999806
YOL030W	21.3834	-0.339128	0.758971	-0.446826	0.655	0.999806
YBR255C-A	4.95979	1.50511	1.67205	0.900157	0.368037	0.999806
YDL054C	29.5358	0.0262255	0.653679	0.0401198	0.967998	0.999806
YKL224C	2.32583	0.556193	2.57706	0.215825	0.829124	0.999806
YJR161C	1.1581	-4.02672	4.67505	-0.861322	0.389061	0.999806
YIL123W	21.3142	0.336183	0.76281	0.440717	0.659418	0.999806
YJR156C	6.18958	-0.317008	1.41708	-0.223705	0.822987	0.999806
YJR160C	1.84508	1.17984	2.93714	0.401698	0.687907	0.999806
YJR153W	10.5446	-0.0963111	1.08473	-0.0887877	0.929251	0.999806
YJR152W	12.805	0.659971	0.955101	0.690996	0.489568	0.999806
YJR155W	14.7237	0.068666	0.898418	0.0764299	0.939077	0.999806
YJR154W	12.1012	-0.182516	0.983168	-0.18564	0.852727	0.999806
YBL068W	8.52164	0.0729407	1.15744	0.0630191	0.949751	0.999806
YBL069W	28.9532	0.0758076	0.659378	0.114968	0.90847	0.999806
YBL066C	38.9392	0.216593	0.577851	0.374825	0.707791	0.999806
YBL067C	8.36486	1.60716	1.21458	1.32323	0.185759	0.999806
YBL072C	3.76374	-2.11216	2.07259	-1.01909	0.308158	0.999806
YBL074C	10.5403	-0.504836	1.05063	-0.480506	0.630868	0.999806
YBL071W-A	1.93546	-1.00728	3.14263	-0.320522	0.748573	0.999806
YBR252W	3.28205	-1.18421	2.16287	-0.547515	0.584025	0.999806
YBL063W	42.0063	-0.206895	0.55936	-0.369879	0.711473	0.999806
YBL064C	13.8507	0.125214	0.914653	0.136898	0.891111	0.999806
YOL031C	22.0208	0.610079	0.766983	0.795428	0.426365	0.999806
YBR253W	1.54319	-1.7712	3.39627	-0.521513	0.602009	0.999806
YDL051W	15.1789	-1.07765	0.94982	-1.13458	0.25655	0.999806
YIL130W	32.7852	-0.535032	0.627363	-0.852825	0.393756	0.999806
YKR039W	26.5148	1.12911	0.69605	1.62217	0.104767	0.999806
YPL171C	34.3692	-0.181359	0.628242	-0.288678	0.772828	0.999806
YIL129C	50.8387	-0.697638	0.529387	-1.31782	0.187563	0.999806
YLR098C	8.82353	0.538985	1.13644	0.474274	0.635304	0.999806
YOR320C	13.1795	0.32774	0.935253	0.350429	0.726017	0.999806
YOR014W	14.8059	-0.0952151	0.901832	-0.10558	0.915916	0.999806
YLR099C	18.5138	0.422314	0.804119	0.525189	0.599452	0.999806
YPL070W	17.2505	0.32351	0.830799	0.389396	0.696983	0.999806
YOR012W	2.43206	1.85912	2.55816	0.726742	0.467384	0.999806
YOL032W	9.97012	-0.12826	1.06983	-0.119888	0.904571	0.999806
YDL052C	16.4952	0.776564	0.851218	0.912298	0.361612	0.999806
YMR001C-A	10.9095	-1.37062	1.07046	-1.28041	0.200402	0.999806
YCL057W	45.4476	-0.449288	0.557083	-0.806501	0.419954	0.999806
YPR108W	10.8316	-0.565054	1.0363	-0.545261	0.585574	0.999806
YMR001C	6.88373	0.387334	1.31811	0.293856	0.768868	0.999806
YCL057C-A	7.08467	0.8109	1.29373	0.626791	0.530796	0.999806
YCL058W-A	6.00015	-0.271595	1.43071	-0.189833	0.84944	0.999806
YKL090W	29.6119	-0.096175	0.670071	-0.143529	0.885872	0.999806
YKL091C	13.269	0.132031	0.932427	0.141599	0.887397	0.999806
YKL088W	8.51635	-0.233172	1.16161	-0.200732	0.840909	0.999806
YKL089W	0.967729	-1.00651	4.5111	-0.223118	0.823444	0.999806
YKL086W	46.6474	-0.240051	0.532241	-0.45102	0.651975	0.999806
YKL087C	14.5156	-0.146961	0.902815	-0.162781	0.870691	0.999806
YKL084W	29.2162	-0.3013	0.661891	-0.455211	0.648957	0.999806
YKL085W	17.0433	0.0728857	0.834342	0.0873571	0.930388	0.999806
YKL081W	14.0799	0.983788	0.930112	1.05771	0.290188	0.999806
YKL082C	6.67127	-0.708314	1.34935	-0.524929	0.599633	0.999806
YOL033W	2.99696	-0.489212	2.22561	-0.21981	0.826019	0.999806
YCL059C	3.6796	-0.10317	1.95233	-0.0528445	0.957856	0.999806
YOR104W	8.24806	0.695177	1.19827	0.580152	0.561812	0.999806
YKR030W	6.30109	0.639531	1.39882	0.457193	0.647532	0.999806
YKR029C	21.368	1.36403	0.803782	1.69702	0.0896929	0.999806
YPL271W	1.2581	-0.143459	3.59569	-0.0398976	0.968175	0.999806
YNL196C	15.6737	-0.310517	0.869708	-0.357036	0.721065	0.999806
YML001W	11.2441	0.529718	1.01285	0.522998	0.600975	0.999806
YPL270W	28.4104	0.575839	0.663876	0.86739	0.385728	0.999806
YML002W	43.0359	0.293619	0.575721	0.510002	0.61005	0.999806
YPR007C	19.7719	0.388231	0.780904	0.497155	0.619079	0.999806
YDL213C	10.3562	-0.209984	1.05196	-0.199611	0.841785	0.999806
YNL301C	19.8393	-0.181081	0.782541	-0.231402	0.817003	0.999806
YOR373W	14.0348	-0.0779292	0.913191	-0.0853372	0.931993	0.999806
YMR300C	1.83451	-2.0782	3.14229	-0.661365	0.508378	0.999806
YPL228W	8.12503	-0.474123	1.19677	-0.396167	0.691982	0.999806
YPL072W	14.1233	-0.172892	0.940587	-0.183813	0.85416	0.999806
YPL207W	31.4809	0.173072	0.633383	0.27325	0.784661	0.999806
YOL026C	2.82338	2.18178	2.37661	0.918022	0.358607	0.999806
YDR032C	10.8431	-0.187194	1.0377	-0.180392	0.856845	0.999806
YNL219C	13.3929	0.703217	0.972059	0.723431	0.469415	0.999806
YJL141C	32.5198	-0.398803	0.667158	-0.597764	0.549997	0.999806
YDL218W	15.2035	0.0941243	0.878236	0.107174	0.914651	0.999806
YIL014C-A	2.32678	-0.0122898	2.78421	-0.00441409	0.996478	0.999806
YIL014W	14.8122	-0.0169555	0.889234	-0.0190676	0.984787	0.999806
YIL013C	41.6308	-0.0609853	0.559072	-0.109083	0.913137	0.999806
YIL011W	6.68278	-0.0903732	1.35171	-0.0668586	0.946694	0.999806
YIL010W	14.3208	-0.316164	0.905937	-0.348991	0.727096	0.999806
YIL009C-A	13.9525	0.0937165	0.939037	0.0998007	0.920503	0.999806
YIL009W	40.8314	-0.309589	0.565155	-0.547795	0.583833	0.999806
YIL008W	2.12489	-1.14375	2.75081	-0.415786	0.677567	0.999806
YIL007C	15.9746	0.0712028	0.866715	0.0821525	0.934525	0.999806
YIL006W	21.1551	-1.23229	0.783799	-1.5722	0.115903	0.999806
YLR097C	7.9558	0.977708	1.23497	0.791683	0.428546	0.999806
YCL021W-A	7.44768	-0.286285	1.26471	-0.226364	0.820918	0.999806
YPL214C	16.7361	-0.356674	0.845606	-0.421796	0.673174	0.999806
YGL075C	5.30694	-2.0067	1.66594	-1.20455	0.228378	0.999806
YGL073W	20.9353	0.365389	0.763109	0.478817	0.632069	0.999806
YGL071W	15.5107	0.515555	0.87018	0.592469	0.553537	0.999806
YGL070C	3.96469	-0.611366	1.87335	-0.32635	0.74416	0.999806
YGL068W	1.45376	0.441979	3.32188	0.133051	0.894153	0.999806
YGL067W	11.0484	0.468218	1.02102	0.45858	0.646536	0.999806
YGL066W	11.9003	-0.496532	0.999704	-0.496679	0.619416	0.999806
YGL065C	11.3009	-1.08096	1.03828	-1.0411	0.297827	0.999806
YGL064C	4.75261	0.732658	1.66162	0.440931	0.659263	0.999806
YHR147C	0.581694	-0.0943944	5.75197	-0.0164108	0.986907	0.999806
YHR148W	8.52164	0.0729407	1.15744	0.0630191	0.949751	0.999806
YLL051C	26.7787	0.71729	0.6941	1.03341	0.301412	0.999806
YLL052C	9.75766	-0.990521	1.10779	-0.894142	0.371246	0.999806
YLL053C	10.7412	-0.148487	1.03753	-0.143116	0.886198	0.999806
YLL054C	11.5363	0.339302	1.0125	0.335112	0.737541	0.999806
YJL036W	11.6186	0.143922	1.00723	0.142888	0.886378	0.999806
YJL037W	13.3363	-0.820591	0.949661	-0.864089	0.387539	0.999806
YJL034W	8.02409	-0.627797	1.21176	-0.518087	0.604397	0.999806
YJL035C	2.04074	1.4433	2.79183	0.516972	0.605176	0.999806
YJL041W	4.44015	-1.71472	1.82495	-0.939599	0.347423	0.999806
YJL042W	75.6064	-0.788386	0.439232	-1.79492	0.0726669	0.999806
YJL038C	2.32055	-0.558493	2.57637	-0.216775	0.828384	0.999806
YJL039C	17.1116	-0.756223	0.845641	-0.89426	0.371183	0.999806
YDR011W	55.6227	0.997216	0.490049	2.03493	0.0418577	0.999806
YLR263W	10.7801	1.14862	1.03717	1.10746	0.268096	0.999806
YJL031C	1.25282	-4.12673	4.17551	-0.988318	0.322997	0.999806
YJL033W	10.3403	-1.10762	1.08643	-1.0195	0.307965	0.999806
YLR266C	26.8764	-0.846445	0.701512	-1.2066	0.227586	0.999806
YLR265C	2.90847	-0.0129056	2.46391	-0.00523785	0.995821	0.999806
YPR155C	24.676	-0.210757	0.710411	-0.296669	0.766719	0.999806
YOL028C	11.1229	-0.622609	1.03176	-0.603444	0.546214	0.999806
YPL146C	3.6796	-0.10317	1.95233	-0.0528445	0.957856	0.999806
YMR169C	17.9101	-0.0346759	0.817097	-0.0424379	0.96615	0.999806
YJR127C	99.1897	-0.295328	0.377197	-0.782954	0.433654	0.999806
YKR041W	73.7128	1.6818	0.437065	3.84794	0.000119113	0.0894576
YMR170C	13.4824	0.520114	0.954048	0.545165	0.58564	0.999806
YBR238C	9.69126	0.172953	1.10686	0.156255	0.875832	0.999806
YJR019C	22.5838	0.462056	0.737497	0.626519	0.530975	0.999806
YGL098W	0.772069	-3.44129	5.60678	-0.613773	0.539365	0.999806
YGL099W	4.63581	-1.29969	1.73932	-0.747238	0.45492	0.999806
YJR021C	15.6895	0.18779	0.869893	0.215877	0.829084	0.999806
YGL103W	4.74733	0.236385	1.65761	0.142606	0.886602	0.999806
YGL104C	15.8001	0.633803	0.896896	0.706663	0.479776	0.999806
YGL100W	5.03336	-0.438344	1.64191	-0.266972	0.789491	0.999806
YGL101W	6.86165	-1.00882	1.34183	-0.751826	0.452156	0.999806
YGL107C	5.90977	0.416077	1.45667	0.285636	0.775157	0.999806
YGL108C	3.39451	0.413839	2.07671	0.199276	0.842047	0.999806
YGL105W	3.77431	-0.142852	1.91785	-0.0744855	0.940624	0.999806
YBR237W	10.2509	-0.762737	1.08361	-0.703884	0.481505	0.999806
YPL074W	19.448	-0.277322	0.790551	-0.350796	0.725742	0.999806
YDR057W	14.7227	0.16346	0.889655	0.183734	0.854222	0.999806
YOL029C	8.53315	0.478926	1.16386	0.411497	0.680708	0.999806
YOR386W	9.39371	0.138338	1.10201	0.125533	0.900102	0.999806
YOR384W	29.7315	0.0542279	0.651612	0.083221	0.933676	0.999806
YOR385W	12.3012	0.211886	0.967587	0.218984	0.826663	0.999806
YOR382W	1.8398	-0.102231	2.92595	-0.0349396	0.972128	0.999806
YOR383C	6.20109	0.285244	1.39283	0.204794	0.837733	0.999806
YOR381W	17.5355	0.21885	0.823544	0.265742	0.790438	0.999806
YOR381W-A	2.14169	1.77649	2.90217	0.612126	0.540455	0.999806
YOR378W	22.6583	-0.0391461	0.739281	-0.0529517	0.95777	0.999806
YOR380W	28.1936	0.214727	0.667591	0.321645	0.747721	0.999806
YGR250C	27.3889	-0.224204	0.677427	-0.330964	0.740672	0.999806
YGR251W	2.52149	0.820514	2.46525	0.332832	0.739261	0.999806
YGR252W	7.35919	-0.104753	1.26547	-0.0827779	0.934028	0.999806
YGR253C	5.99392	-0.487357	1.45159	-0.33574	0.737067	0.999806
YGR246C	7.4424	-0.681691	1.26965	-0.536911	0.591329	0.999806
YGR247W	7.37505	0.870191	1.25776	0.691858	0.489027	0.999806
YGR248W	11.2609	1.02435	1.0129	1.0113	0.311874	0.999806
YGR249W	6.90053	1.1858	1.38279	0.857539	0.391147	0.999806
YJR104C	16.4678	0.143058	0.848283	0.168644	0.866077	0.999806
YJR103W	56.5545	0.0583968	0.484014	0.120651	0.903967	0.999806
YJR106W	20.6219	-0.00594516	0.767816	-0.00774295	0.993822	0.999806
YJR024C	11.8152	0.0925978	0.983975	0.0941058	0.925025	0.999806
YGR254W	25.6447	-0.296742	0.700933	-0.423352	0.672038	0.999806
YGR255C	14.6174	-0.175524	0.899423	-0.195152	0.845274	0.999806
YJR110W	37.3456	-0.224474	0.59886	-0.374836	0.707782	0.999806
YJR109C	45.8902	-0.00204494	0.535322	-0.00382003	0.996952	0.999806
YOR287C	2.13112	-0.424847	2.94135	-0.144439	0.885153	0.999806
YDR366C	8.23126	-0.00966611	1.18204	-0.00817747	0.993475	0.999806
YOR289W	13.7886	1.05405	0.925943	1.13835	0.254973	0.999806
YOR236W	9.58314	0.107228	1.11647	0.0960419	0.923487	0.999806
YOR063W	3.38828	0.0970923	2.05506	0.0472455	0.962318	0.999806
YOR284W	8.80767	-0.311026	1.15166	-0.270068	0.787108	0.999806
YOR285W	12.396	0.199881	0.971388	0.205769	0.836972	0.999806
YDR367W	2.99696	-0.489212	2.22561	-0.21981	0.826019	0.999806
YOR212W	23.8049	-0.312157	0.724391	-0.430923	0.666524	0.999806
YMR271C	8.9139	0.0982984	1.14858	0.0855825	0.931798	0.999806
YOR291W	42.6001	0.111461	0.574431	0.194038	0.846146	0.999806
YOR037W	14.4977	1.87503	0.926277	2.02426	0.0429433	0.999806
YPL066W	20.4527	0.550882	0.781008	0.705347	0.480594	0.999806
YPL065W	3.86903	-0.181727	1.91497	-0.0948979	0.924396	0.999806
YDL055C	1.75037	1.29849	3.2278	0.402282	0.687476	0.999806
YCL044C	19.2663	0.226409	0.852999	0.265427	0.79068	0.999806
YOR177C	15.4231	0.504173	0.916226	0.550271	0.582133	0.999806
YMR190C	24.977	0.0301077	0.711141	0.0423371	0.96623	0.999806
YOR180C	3.00224	0.38518	2.24351	0.171686	0.863684	0.999806
YPR156C	19.3744	0.260151	0.790637	0.32904	0.742126	0.999806
YOR179C	17.6206	-0.157597	0.833809	-0.189008	0.850086	0.999806
YGR111W	12.5978	0.344133	0.954404	0.360573	0.718418	0.999806
YGR112W	5.44582	1.64418	1.55326	1.05853	0.289814	0.999806
YOL054W	10.0975	1.14605	1.07635	1.06475	0.286988	0.999806
YGR104C	4.26658	0.48045	1.78001	0.269915	0.787226	0.999806
YGR106C	8.14278	0.144368	1.25487	0.115046	0.908409	0.999806
YGR108W	10.7652	0.387916	1.08401	0.357851	0.720454	0.999806
YGR109C	10.5739	0.66604	1.04357	0.638229	0.523324	0.999806
YGR109W-B	37.072	-0.0697877	0.593131	-0.11766	0.906337	0.999806
YGR109W-A	4.16563	0.272609	1.80079	0.151383	0.879673	0.999806
YGR110W	4.36752	0.671307	1.79953	0.373045	0.709115	0.999806
YDR319C	10.8528	0.403986	1.02955	0.392393	0.694768	0.999806
YDR318W	9.42202	1.08936	1.12507	0.968261	0.332914	0.999806
YDR317W	9.12013	0.700763	1.1261	0.622291	0.53375	0.999806
YIL026C	22.9194	-0.402683	0.748647	-0.537881	0.59066	0.999806
YOR209C	6.77656	0.0992046	1.33307	0.0744181	0.940678	0.999806
YDR316W	15.9746	0.0712028	0.866715	0.0821525	0.934525	0.999806
YDR315C	5.24488	1.11576	1.5739	0.708917	0.478376	0.999806
YDR314C	14.666	1.19347	0.900041	1.32602	0.184833	0.999806
YIL035C	27.7509	-0.495311	0.685302	-0.722763	0.469825	0.999806
YIL034C	36.3197	-1.15548	0.610762	-1.89187	0.058508	0.999806
YIL037C	18.5653	-0.645932	0.812978	-0.794526	0.426889	0.999806
YIL036W	29.1355	0.0739891	0.695414	0.106396	0.915268	0.999806
YIL030C	37.6042	-0.663765	0.595503	-1.11463	0.26501	0.999806
YIL029C	2.70658	-0.855624	2.37121	-0.360839	0.71822	0.999806
YIL033C	11.5027	-0.818019	1.01428	-0.806501	0.419954	0.999806
YDR320C	7.82843	-0.779896	1.23385	-0.632084	0.527332	0.999806
YNL125C	21.4372	0.751381	0.756204	0.993622	0.320407	0.999806
YML045W-A	1.54319	-1.7712	3.39627	-0.521513	0.602009	0.999806
YML041C	12.2075	0.110365	0.982818	0.112294	0.91059	0.999806
YML042W	34.3798	-0.0299535	0.623161	-0.048067	0.961663	0.999806
YNL121C	12.9661	-0.0938431	0.963855	-0.0973623	0.922439	0.999806
YNL122C	5.23865	0.939256	1.58909	0.591065	0.554477	0.999806
YML037C	2.14169	1.77649	2.90217	0.612126	0.540455	0.999806
YML038C	5.32997	-0.0481697	1.63049	-0.029543	0.976431	0.999806
YML035C	27.2868	1.04116	0.690543	1.50774	0.131622	0.999806
YDR370C	8.71824	0.00543747	1.16256	0.00467713	0.996268	0.999806
YNL118C	10.2773	0.525599	1.05184	0.499694	0.61729	0.999806
YNL119W	9.58408	-0.041544	1.09042	-0.0380992	0.969609	0.999806
YPR048W	6.5809	-0.0267029	1.3584	-0.0196576	0.984317	0.999806
YPL088W	14.1703	0.718396	0.955138	0.752138	0.451968	0.999806
YPR046W	2.32583	0.556193	2.57706	0.215825	0.829124	0.999806
YDR371W	19.9676	0.423845	0.777578	0.545084	0.585696	0.999806
YNL305C	9.98069	0.373029	1.06859	0.349086	0.727025	0.999806
YMR188C	3.1147	1.70521	2.34537	0.727055	0.467192	0.999806
YPL152W	7.50336	2.39505	1.34143	1.78545	0.0741887	0.999806
YPL199C	4.77998	3.18459	1.85335	1.71829	0.085743	0.999806
YOL025W	15.301	-0.194524	0.924536	-0.210401	0.833355	0.999806
YNL051W	10.7456	0.221938	1.08983	0.203645	0.838631	0.999806
YHR131C	25.4659	-0.076908	0.705697	-0.108982	0.913217	0.999806
YAR031W	12.2792	-0.540017	0.981074	-0.550434	0.582022	0.999806
YDL222C	34.7788	0.280012	0.609141	0.459684	0.645743	0.999806
YPL232W	15.1159	0.0850425	0.916763	0.0927639	0.926091	0.999806
YPR080W	2.32055	-0.558493	2.57637	-0.216775	0.828384	0.999806
YOR036W	2.40998	-2.49131	2.77847	-0.896647	0.369908	0.999806
YIL103W	17.2948	-0.860205	0.854657	-1.00649	0.314179	0.999806
YOR313C	3.88149	0.420995	3.57483	0.117766	0.906253	0.999806
YDR499W	6.02223	1.09569	1.44491	0.758314	0.448263	0.999806
YMR076C	23.3002	-0.563521	0.740095	-0.761417	0.446408	0.999806
YMR075W	9.38408	-0.597326	1.13085	-0.528211	0.597353	0.999806
YDR494W	5.42997	0.373919	1.54432	0.242125	0.808683	0.999806
YDR493W	6.61978	2.07934	1.39568	1.48984	0.136266	0.999806
YDR492W	12.9742	-0.227509	0.972876	-0.233852	0.8151	0.999806
YDR490C	41.4069	-0.335929	0.562272	-0.59745	0.550207	0.999806
YDR498C	6.69241	0.833154	1.35005	0.617131	0.537149	0.999806
YDR497C	41.961	0.272712	0.56355	0.483917	0.628445	0.999806
YDR496C	13.2016	0.928715	0.94225	0.985635	0.324312	0.999806
YDR495C	11.5186	-0.0639676	0.999615	-0.0639922	0.948976	0.999806
YFR025C	36.2062	-0.0584648	0.595449	-0.0981861	0.921785	0.999806
YFR024C-A	18.6855	0.16143	0.832744	0.193853	0.846291	0.999806
YFR027W	4.9209	-1.88032	1.73293	-1.08506	0.277897	0.999806
YFR026C	15.3655	-0.74031	0.897623	-0.824745	0.409516	0.999806
YFR029W	37.521	-0.54146	0.590397	-0.917111	0.359085	0.999806
YFR028C	7.34674	-0.443003	1.29837	-0.3412	0.732953	0.999806
YFR031C	23.3623	-1.39497	0.763569	-1.82691	0.0677135	0.999806
YFR030W	31.8415	-0.308147	0.64494	-0.477792	0.632798	0.999806
YFR032C	9.37785	-0.750337	1.11873	-0.670706	0.502408	0.999806
YFR031C-A	3.69017	1.18039	1.95755	0.602995	0.546512	0.999806
YOL004W	30.1387	0.351407	0.645856	0.544095	0.586376	0.999806
YMR186W	15.152	1.25173	0.890443	1.40573	0.159803	0.999806
YMR185W	14.6112	-0.258432	0.896489	-0.288271	0.773139	0.999806
YPL254W	4.36224	0.135995	1.81403	0.0749686	0.94024	0.999806
YER053C	20.4095	-0.371961	0.777735	-0.478262	0.632464	0.999806
YER052C	15.4063	0.127252	0.894323	0.142288	0.886852	0.999806
YER051W	16.6635	0.190333	0.843725	0.225587	0.821523	0.999806
YER050C	1.2581	-0.143459	3.59569	-0.0398976	0.968175	0.999806
YER056C	21.5708	1.36298	0.761841	1.78906	0.0736054	0.999806
YER055C	16.0765	0.0435834	0.857831	0.0508066	0.95948	0.999806
YER054C	26.2211	-0.396569	0.697762	-0.568344	0.569801	0.999806
YBR200W-A	0.581694	-0.0943944	5.75197	-0.0164108	0.986907	0.999806
YNL036W	2.8181	1.30924	2.31291	0.566058	0.571354	0.999806
YER057C	7.84523	0.0986693	1.21067	0.0814996	0.935045	0.999806
YER056C-A	0.777354	0.903804	4.92745	0.183422	0.854467	0.999806
YLR007W	7.07844	0.677236	1.29256	0.523949	0.600314	0.999806
YNL199C	11.6018	-0.419905	1.0274	-0.408705	0.682756	0.999806
YPR078C	30.2088	-0.159134	0.668034	-0.238212	0.811716	0.999806
YOR043W	17.2674	-1.9607	0.90546	-2.16542	0.0303556	0.999806
YMR216C	13.7665	0.485217	0.91728	0.528973	0.596824	0.999806
YAL010C	5.41317	-0.85615	1.55141	-0.551854	0.581048	0.999806
YMR294W	6.48618	-0.00459981	1.35721	-0.00338916	0.997296	0.999806
YMR008C	8.02937	-0.266136	1.20584	-0.220706	0.825321	0.999806
YOR197W	19.1989	0.784363	0.847299	0.925722	0.35459	0.999806
YBR200W	1.93451	-0.183437	2.86416	-0.0640456	0.948934	0.999806
YDR268W	6.47561	-0.900889	1.38281	-0.651491	0.51473	0.999806
YDR267C	5.13865	0.525773	1.5766	0.333485	0.738768	0.999806
YDR266C	11.546	0.858987	1.00011	0.858895	0.390399	0.999806
YDR265W	5.12713	-0.171102	1.60144	-0.106842	0.914914	0.999806
YDR264C	20.42	-0.104952	0.778998	-0.134727	0.892827	0.999806
YDR263C	11.1609	0.835643	1.01896	0.820094	0.412163	0.999806
YDR262W	6.78807	0.607164	1.31728	0.460923	0.644854	0.999806
YDR261W-A	3.10847	1.40917	2.20242	0.639827	0.522285	0.999806
YDL002C	7.16882	0.129059	1.27819	0.10097	0.919574	0.999806
YOR039W	8.04089	0.19815	1.19377	0.165987	0.868167	0.999806
YBR106W	4.55695	0.594951	1.7043	0.349088	0.727023	0.999806
YBR107C	7.74428	-0.0264911	1.22234	-0.0216725	0.982709	0.999806
YBR104W	18.4821	-0.405887	0.820559	-0.494647	0.62085	0.999806
YBR105C	20.684	-0.764061	0.779052	-0.980757	0.326712	0.999806
YBR102C	17.888	-0.569466	0.826025	-0.689404	0.490569	0.999806
YBR103W	8.17977	2.16149	1.24521	1.73584	0.0825926	0.999806
YBR098W	22.9204	-0.470847	0.738763	-0.637346	0.5239	0.999806
YBR101C	4.44544	-0.821162	1.75657	-0.46748	0.640156	0.999806
YBR096W	5.24393	1.38419	1.63913	0.844467	0.398409	0.999806
YBR097W	11.5912	-0.966329	1.02938	-0.93875	0.347859	0.999806
YMR029C	10.7739	1.06527	1.04717	1.01728	0.309018	0.999806
YDL241W	3.86903	-0.181727	1.91497	-0.0948979	0.924396	0.999806
YBR201C-A	3.88054	0.728095	1.88465	0.386329	0.699253	0.999806
YAR023C	14.4146	-0.22092	0.914036	-0.241697	0.809015	0.999806
YPR084W	7.85051	0.408625	1.20922	0.337925	0.73542	0.999806
YMR257C	8.23655	0.291207	1.17802	0.247201	0.804753	0.999806
YOR040W	22.8857	0.630992	0.732769	0.861106	0.38918	0.999806
YCR044C	4.73147	-1.83045	1.78013	-1.02827	0.303823	0.999806
YDL159W-A	1.8398	-0.102231	2.92595	-0.0349396	0.972128	0.999806
YDL240W	21.3276	0.369618	0.770659	0.479612	0.631503	0.999806
YHR133C	9.8922	0.489468	1.08989	0.449099	0.65336	0.999806
YOR193W	8.90673	0.132821	1.15005	0.115491	0.908056	0.999806
YPR083W	21.8517	-0.503471	0.763295	-0.659602	0.509509	0.999806
YMR262W	13.291	0.743681	0.934283	0.795991	0.426037	0.999806
YKR022C	7.70431	2.8515	1.35441	2.10534	0.0352616	0.999806
YBL106C	30.4954	0.0520548	0.654797	0.0794977	0.936637	0.999806
YOR312C	4.15506	-1.11266	1.84973	-0.601525	0.547491	0.999806
YHR108W	16.4784	0.436176	0.846135	0.515492	0.606209	0.999806
YBR029C	4.93242	-0.687968	1.64523	-0.418159	0.675831	0.999806
YBR030W	12.6146	0.791416	0.960152	0.824262	0.409791	0.999806
YBR026C	5.98863	-1.02794	1.46698	-0.700715	0.483481	0.999806
YBR028C	9.38314	-0.427788	1.10834	-0.385972	0.699517	0.999806
YBR034C	27.3879	-0.170451	0.677622	-0.251543	0.801394	0.999806
YBR035C	10.5562	0.251905	1.05496	0.238782	0.811274	0.999806
YBR031W	4.16035	-0.348394	1.80955	-0.192531	0.847327	0.999806
YBR033W	37.9618	0.0774499	0.581986	0.133079	0.894131	0.999806
YPR082C	4.6411	-0.557947	1.6986	-0.328475	0.742552	0.999806
YBR036C	16.5688	0.199279	0.850692	0.234255	0.814787	0.999806
YBR037C	6.97316	0.0137696	1.30027	0.0105898	0.991551	0.999806
YDR033W	16.5635	0.0498756	0.854078	0.058397	0.953432	0.999806
YOL155C	25.5342	-0.63028	0.716002	-0.880277	0.378709	0.999806
YGR136W	14.7972	-0.688711	0.911724	-0.755394	0.450012	0.999806
YOL156W	10.658	0.20722	1.0364	0.199943	0.841525	0.999806
YOL157C	11.5397	0.776961	1.02403	0.758726	0.448017	0.999806
YOL151W	5.72034	0.47041	1.47232	0.319503	0.749345	0.999806
YOL152W	48.604	-0.0500168	0.521106	-0.0959821	0.923535	0.999806
YGL202W	22.4785	0.256548	0.73775	0.347744	0.728032	0.999806
YDL160C-A	3.58922	0.974259	2.02735	0.480558	0.630831	0.999806
YOL148C	5.04393	0.55787	1.61062	0.346371	0.729064	0.999806
YDL234C	18.9999	0.488023	0.795034	0.613839	0.539322	0.999806
YGL198W	8.14712	0.5977	1.18984	0.502337	0.615431	0.999806
YMR237W	26.1394	0.0813217	0.705159	0.115324	0.908188	0.999806
YGL200C	12.1295	0.597953	1.03529	0.577569	0.563555	0.999806
YPL135W	17.2601	0.674964	0.838743	0.804732	0.420974	0.999806
YGL205W	34.5884	0.328292	0.612147	0.536296	0.591754	0.999806
YGR143W	34.9365	-0.16446	0.60758	-0.270681	0.786636	0.999806
YKR028W	52.3123	0.944464	0.50457	1.87182	0.0612316	0.999806
YMR195W	9.99843	0.800233	1.102	0.726167	0.467736	0.999806
YGL203C	31.743	-0.118553	0.6395	-0.185383	0.852928	0.999806
YKR027W	39.7809	0.906996	0.585912	1.54801	0.12162	0.999806
YMR044W	19.0176	0.712651	0.810361	0.879423	0.379172	0.999806
YGL204C	1.16339	-0.0110442	4.02552	-0.00274354	0.997811	0.999806
YMR238W	16.1818	0.339354	0.85374	0.397491	0.691006	0.999806
YKR026C	16.3995	0.869054	0.85113	1.02106	0.307226	0.999806
YDR079C-A	0.973014	1.48712	4.4059	0.337529	0.735718	0.999806
YMR222C	5.51845	0.15194	1.52367	0.0997194	0.920567	0.999806
YKL201C	50.1721	0.00327574	0.536175	0.00610947	0.995125	0.999806
YKL198C	223.221	-0.270883	0.255146	-1.06168	0.288382	0.999806
YKL197C	47.6859	-0.39575	0.529596	-0.747268	0.454902	0.999806
YKL196C	4.54015	-0.850864	1.75252	-0.485508	0.627316	0.999806
YKL195W	2.42678	0.89557	2.5062	0.357342	0.720836	0.999806
YKL194C	14.2137	-0.488835	0.919961	-0.531365	0.595166	0.999806
YKL193C	6.47995	-0.187226	1.40006	-0.133727	0.893619	0.999806
YJL081C	3.08639	-1.77002	2.30409	-0.768207	0.442364	0.999806
YKL191W	11.5912	-0.966329	1.02938	-0.93875	0.347859	0.999806
YKR024C	24.3269	1.89612	0.736571	2.57425	0.0100458	0.999806
YPL125W	20.9123	0.0277292	0.76542	0.0362275	0.971101	0.999806
YDL174C	37.1507	0.660261	0.592435	1.11449	0.265071	0.999806
YIL050W	12.7661	-0.504039	0.957567	-0.526375	0.598628	0.999806
YKR023W	24.1827	1.1452	0.720914	1.58854	0.112165	0.999806
YBL079W	26.1068	-0.483448	0.706786	-0.684009	0.49397	0.999806
YBL081W	12.3118	0.600516	0.975792	0.615414	0.538281	0.999806
YBL080C	13.9233	-0.557428	0.924308	-0.603076	0.546458	0.999806
YBL084C	8.21975	-0.4902	1.1919	-0.411277	0.680869	0.999806
YBL082C	24.1183	0.0381319	0.7272	0.0524366	0.958181	0.999806
YBL085W	18.4191	0.430709	0.808909	0.532457	0.59441	0.999806
YIL056W	39.4742	-0.421123	0.581045	-0.724767	0.468595	0.999806
YKR021W	42.2201	0.950973	0.55694	1.7075	0.08773	0.999806
YPR176C	4.63581	-1.29969	1.73932	-0.747238	0.45492	0.999806
YBL076C	6.77127	-0.289954	1.331	-0.217846	0.827549	0.999806
YBL075C	23.7189	0.0391169	0.727807	0.0537463	0.957137	0.999806
YPL231W	15.7569	-0.588164	0.884106	-0.665265	0.505881	0.999806
YDL003W	6.7775	-0.111566	1.32436	-0.0842413	0.932865	0.999806
YBR175W	8.90239	-0.326265	1.13784	-0.28674	0.774311	0.999806
YPR161C	11.5345	0.574691	1.01251	0.567592	0.570312	0.999806
YDL178W	22.4598	0.111283	0.764787	0.145508	0.88431	0.999806
YPR167C	9.68937	0.455713	1.10205	0.413513	0.679231	0.999806
YDR101C	5.81506	0.443115	1.45544	0.304455	0.760781	0.999806
YPL060W	24.29	-0.176984	0.716168	-0.247127	0.80481	0.999806
YPL174C	6.28524	-0.591541	1.39597	-0.42375	0.671748	0.999806
YOL010W	5.70354	-0.657291	1.49207	-0.440524	0.659558	0.999806
YDL161W	10.4739	0.461544	1.06597	0.432981	0.665029	0.999806
YOL011W	36.0388	0.18982	0.59756	0.317658	0.750744	0.999806
YLR360W	9.79126	0.403469	1.08191	0.372924	0.709205	0.999806
YOL008W	2.99696	-0.489212	2.22561	-0.21981	0.826019	0.999806
YPL230W	23.0499	4.00994	0.904843	4.43164	9.35191e-06	0.010635
YOL009C	14.1137	-0.694305	0.920392	-0.754358	0.450634	0.999806
YLR096W	14.5712	1.20581	0.906249	1.33055	0.183338	0.999806
YPR168W	11.6037	-0.700148	1.00952	-0.693543	0.487969	0.999806
YOL013W-A	10.8316	-0.565054	1.0363	-0.545261	0.585574	0.999806
YOR316C	31.0728	-0.0777622	0.638945	-0.121704	0.903133	0.999806
YPL175W	12.6652	-0.601808	0.966026	-0.622973	0.533302	0.999806
YOL014W	3.00847	0.722614	2.21863	0.325703	0.744649	0.999806
YKL117W	6.20109	0.285244	1.39283	0.204794	0.837733	0.999806
YKL116C	8.43749	0.656604	1.16429	0.563954	0.572786	0.999806
YKL114C	16.9557	0.065211	0.871575	0.0748197	0.940358	0.999806
YKL124W	18.575	-0.249435	0.813625	-0.306572	0.759169	0.999806
YKL122C	3.00319	-0.0693278	2.23615	-0.0310032	0.975267	0.999806
YKL121W	24.027	0.261681	0.715638	0.365661	0.714618	0.999806
YKL120W	8.24278	0.415459	1.20396	0.345077	0.730036	0.999806
YDL159W	18.2014	-0.0739891	0.812156	-0.0911021	0.927411	0.999806
YOL013C	15.3337	0.664616	0.936162	0.709936	0.477744	0.999806
YKL113C	6.77221	-0.519042	1.33842	-0.387803	0.698162	0.999806
YKL112W	12.0003	-0.271823	0.982411	-0.27669	0.782018	0.999806
YPR070W	7.0111	2.19937	1.35703	1.62073	0.105076	0.999806
YPR071W	7.26976	0.256346	1.28322	0.199767	0.841663	0.999806
YPL063W	9.86389	-0.522693	1.0838	-0.482279	0.629607	0.999806
YPL172C	2.72338	1.3887	2.52821	0.549282	0.582812	0.999806
YOL115W	24.0785	-0.569747	0.72208	-0.789036	0.430091	0.999806
YPR134W	4.18772	2.212	1.88143	1.1757	0.239715	0.999806
YPL022W	13.7718	0.654467	0.917752	0.71312	0.475772	0.999806
YHR129C	5.22808	0.0275511	1.56146	0.0176445	0.985922	0.999806
YLR375W	25.3164	-1.14088	0.726387	-1.57063	0.116269	0.999806
YLR371W	18.9523	-0.775517	0.819546	-0.946275	0.344008	0.999806
YLR372W	2.60564	-1.4906	2.49207	-0.598137	0.549749	0.999806
YKR084C	22.6597	1.78734	0.768543	2.32562	0.0200389	0.999806
YKR085C	14.9722	1.69316	0.923054	1.8343	0.0666089	0.999806
YLR376C	14.1544	0.227343	0.974052	0.2334	0.815451	0.999806
YLR377C	32.2564	0.278629	0.638123	0.436638	0.662374	0.999806
YKR080W	17.5052	1.75458	0.851894	2.05962	0.0394347	0.999806
YPR139C	3.19262	-0.166605	2.13344	-0.0780919	0.937755	0.999806
YKR082W	42.9954	1.78193	0.564406	3.15718	0.00159304	0.679912
YKR083C	5.82563	1.24106	1.49202	0.831803	0.40552	0.999806
YKR076W	37.9209	0.676352	0.583572	1.15899	0.246462	0.999806
YKR077W	18.9672	-0.227624	0.798177	-0.28518	0.775506	0.999806
YKR078W	28.6368	1.12882	0.693825	1.62696	0.103746	0.999806
YKR079C	30.4587	2.02546	0.678485	2.98527	0.00283327	0.931916
YIL017C	37.4086	-0.695488	0.597394	-1.1642	0.244341	0.999806
YIL018W	0.866784	-3.58748	4.90162	-0.731895	0.464233	0.999806
YIL019W	11.3167	-0.249354	1.02975	-0.24215	0.808664	0.999806
YIL020C	8.22503	-0.150497	1.18819	-0.126661	0.899209	0.999806
YIL021W	13.5329	-0.856447	0.943376	-0.907853	0.363956	0.999806
YIL022W	7.739	-0.374633	1.22696	-0.305335	0.760111	0.999806
YIL023C	21.1195	0.23636	0.758231	0.311725	0.75525	0.999806
YIL024C	6.49241	0.165686	1.36649	0.121249	0.903494	0.999806
YMR296C	5.40788	-1.56943	1.60376	-0.978594	0.327781	0.999806
YIL015W	26.9789	-0.438068	0.698587	-0.627077	0.530609	0.999806
YIL016W	5.98863	-1.02794	1.46698	-0.700715	0.483481	0.999806
YGL056C	27.4109	0.101582	0.6764	0.15018	0.880623	0.999806
YGL057C	8.54901	1.28522	1.16921	1.09922	0.271673	0.999806
YGL058W	5.7026	-0.376657	1.55133	-0.242796	0.808164	0.999806
YGL059W	18.5802	-0.104977	0.815377	-0.128747	0.897558	0.999806
YGL060W	12.6084	0.716759	0.958354	0.747906	0.454517	0.999806
YGL061C	7.54334	-0.512167	1.24846	-0.41024	0.68163	0.999806
YGL062W	54.2368	0.00587629	0.509679	0.0115294	0.990801	0.999806
YGL063W	107.947	-0.033436	0.357706	-0.0934734	0.925527	0.999806
YHR138C	9.4956	0.0907332	1.11852	0.0811191	0.935347	0.999806
YHR137W	11.4071	-0.656948	1.01577	-0.646751	0.517793	0.999806
YJL049W	3.60074	1.89173	2.0333	0.930371	0.352179	0.999806
YJL048C	17.3116	-0.419361	0.838886	-0.499903	0.617144	0.999806
YJL047C-A	3.68488	0.558367	1.94269	0.287419	0.773791	0.999806
YJL047C	12.1065	0.0314111	0.977908	0.0321207	0.974376	0.999806
YGL054C	4.45167	-0.497285	1.76407	-0.281896	0.778024	0.999806
YGL055W	6.97316	0.0137696	1.30027	0.0105898	0.991551	0.999806
YLR207W	35.5316	-0.135532	0.610665	-0.221942	0.824359	0.999806
YLR208W	0.777354	0.903804	4.92745	0.183422	0.854467	0.999806
YPL217C	16.4404	-0.588388	0.85707	-0.686511	0.492391	0.999806
YLR361C	28.22	0.634797	0.66641	0.952562	0.340812	0.999806
YPL170W	15.7178	0.766972	0.867656	0.883959	0.376719	0.999806
YOL016C	18.0216	0.295329	0.813455	0.363055	0.716564	0.999806
YLR262C	2.42149	-0.0815829	2.51834	-0.0323956	0.974157	0.999806
YLR259C	9.66294	-0.977779	1.11006	-0.880831	0.37841	0.999806
YLR199C	5.15016	1.15255	1.63355	0.705549	0.480469	0.999806
YLR257W	18.5359	0.849563	0.808574	1.05069	0.2934	0.999806
YLR201C	6.59769	0.858809	1.34609	0.638005	0.523471	0.999806
YLR203C	13.8276	-0.432693	0.934547	-0.462998	0.643366	0.999806
YLR205C	20.0108	1.27899	0.786705	1.62575	0.104002	0.999806
YLR206W	9.72391	1.45426	1.13635	1.27976	0.200629	0.999806
YGR063C	0.581694	-0.0943944	5.75197	-0.0164108	0.986907	0.999806
YNL031C	6.10543	0.532094	1.42647	0.373015	0.709137	0.999806
YDR075W	11.8205	0.300716	0.983648	0.305715	0.759822	0.999806
YNL215W	3.29356	0.143735	2.07859	0.06915	0.94487	0.999806
YCL028W	11.7993	-0.600675	0.99889	-0.601343	0.547612	0.999806
YGL141W	35.4101	-0.185442	0.623448	-0.297446	0.766126	0.999806
YGL140C	22.6866	0.38143	0.756555	0.504168	0.614144	0.999806
YGL139W	28.1724	-0.144112	0.674741	-0.213581	0.830874	0.999806
YGL138C	5.81072	-0.22342	1.50274	-0.148676	0.88181	0.999806
YGL137W	12.9786	0.0816009	0.943729	0.0864665	0.931096	0.999806
YGL136C	14.4501	0.431199	0.936112	0.460628	0.645065	0.999806
YGL135W	3.56808	-3.1119	2.35586	-1.32092	0.186528	0.999806
YGL134W	19.7763	0.575953	0.789279	0.729721	0.46556	0.999806
YGL133W	42.1447	1.23808	0.58443	2.11843	0.0341385	0.999806
YGL131C	27.8811	-0.119568	0.673006	-0.177662	0.858988	0.999806
YBR247C	3.38299	-0.728248	2.07033	-0.351755	0.725022	0.999806
YBR246W	17.3231	-0.186713	0.830608	-0.224791	0.822142	0.999806
YBR241C	44.1355	-0.151698	0.544116	-0.278796	0.780401	0.999806
YBR240C	15.9923	0.358178	0.859672	0.416646	0.676938	0.999806
YBR243C	1.82828	-4.65279	3.60507	-1.29062	0.196834	0.999806
YBR242W	16.3669	0.0853127	0.849052	0.10048	0.919963	0.999806
YGR245C	17.0991	-0.938266	0.861205	-1.08948	0.275942	0.999806
YGR244C	58.0039	0.000602704	0.481014	0.00125299	0.999	0.999841
YOR377W	26.9302	0.139629	0.683305	0.204343	0.838085	0.999806
YDR044W	4.45072	-0.159204	1.7398	-0.0915072	0.92709	0.999806
YJL192C	14.3199	-0.211149	0.909086	-0.232265	0.816332	0.999806
YGR239C	29.9085	-0.0321112	0.660888	-0.0485879	0.961248	0.999806
YGR238C	35.536	-0.0224922	0.601793	-0.0373754	0.970186	0.999806
YGR237C	27.2196	0.213904	0.677378	0.315782	0.752168	0.999806
YGR236C	8.71201	-0.126284	1.14607	-0.110189	0.91226	0.999806
YGR243W	5.7992	-0.984938	1.49291	-0.659743	0.509419	0.999806
YGR241C	30.553	0.617414	0.650011	0.949852	0.342187	0.999806
YGR240C-A	22.5564	-0.0204179	0.73901	-0.0276287	0.977958	0.999806
YGR240C	10.3994	1.49221	1.06695	1.39858	0.161939	0.999806
YOR315W	13.4593	0.00494812	0.927358	0.00533572	0.995743	0.999806
YPL168W	11.4522	0.755965	1.02444	0.737929	0.460558	0.999806
YJR121W	8.42692	0.0897639	1.16635	0.0769616	0.938654	0.999806
YJR122W	8.89616	-0.47163	1.14617	-0.411484	0.680718	0.999806
YDL232W	0.386035	-2.53664	6.1141	-0.414884	0.678227	0.999806
YJR117W	34.5558	-0.0645063	0.612117	-0.105382	0.916072	0.999806
YJR118C	3.86374	-0.967883	1.93074	-0.501301	0.616159	0.999806
YJR119C	43.498	0.194317	0.547731	0.354768	0.722764	0.999806
YJR120W	10.5686	0.446586	1.04614	0.426887	0.669461	0.999806
YJR112W-A	9.48314	-0.149329	1.10316	-0.135364	0.892324	0.999806
YJR113C	6.67561	-0.0491236	1.37285	-0.0357822	0.971456	0.999806
YJR115W	41.2793	0.222159	0.57176	0.388553	0.697607	0.999806
YJR116W	21.7055	0.403387	0.756764	0.533043	0.594004	0.999806
YPL081W	11.3397	0.395236	1.00263	0.3942	0.693433	0.999806
YPL082C	26.3255	-0.137013	0.689441	-0.198731	0.842473	0.999806
YPL079W	4.16035	-0.348394	1.80955	-0.192531	0.847327	0.999806
YPL085W	14.3218	-0.422868	0.921835	-0.458725	0.646432	0.999806
YCL035C	5.70354	-0.657291	1.49207	-0.440524	0.659558	0.999806
YPL083C	7.53277	-1.44121	1.29599	-1.11205	0.266117	0.999806
YPL084W	8.82353	0.538985	1.13644	0.474274	0.635304	0.999806
YPL076W	4.25072	-1.6579	1.90077	-0.872226	0.383085	0.999806
YAL018C	6.97316	0.0137696	1.30027	0.0105898	0.991551	0.999806
YPL169C	4.06563	-0.313715	1.84979	-0.169595	0.865328	0.999806
YDL067C	0.973014	1.48712	4.4059	0.337529	0.735718	0.999806
YNL241C	47.9372	0.0880393	0.522627	0.168456	0.866225	0.999806
YNL242W	57.283	-0.115413	0.51375	-0.224649	0.822253	0.999806
YDR036C	9.79126	0.403469	1.08191	0.372924	0.709205	0.999806
YJL044C	21.0036	-0.242234	0.768943	-0.315022	0.752745	0.999806
YNL243W	23.8472	0.530638	0.721424	0.735542	0.462009	0.999806
YNL195C	25.5587	0.02884	0.701691	0.0411007	0.967216	0.999806
YLR356W	3.78054	0.160013	1.96239	0.0815397	0.935013	0.999806
YCL036W	29.0666	0.18408	0.664822	0.276886	0.781867	0.999806
YNL293W	37.2782	0.0905276	0.593942	0.152418	0.878857	0.999806
YNL220W	3.57242	-0.808688	2.09639	-0.385753	0.699679	0.999806
YGR103W	3.78583	0.77423	1.94903	0.397239	0.691191	0.999806
YCL026C-A	10.3614	0.041645	1.04803	0.0397364	0.968303	0.999806
YGR101W	4.35601	-0.126063	1.75356	-0.0718899	0.94269	0.999806
YGR100W	30.3017	-0.0693053	0.645488	-0.107369	0.914496	0.999806
YGR099W	13.045	-0.774105	0.967799	-0.799862	0.423791	0.999806
YGR098C	6.17278	-1.76776	1.52047	-1.16264	0.244974	0.999806
YGR097W	40.888	0.184732	0.574272	0.32168	0.747695	0.999806
YGR096W	45.0927	-0.288342	0.540169	-0.533799	0.593481	0.999806
YGR095C	3.86374	-0.967883	1.93074	-0.501301	0.616159	0.999806
YGR094W	16.3554	-0.142191	0.853975	-0.166505	0.86776	0.999806
YGL190C	15.1814	-0.520923	0.888516	-0.586284	0.557685	0.999806
YIL039W	24.0544	0.695839	0.716446	0.971237	0.33143	0.999806
YGL192W	24.4121	0.280092	0.715505	0.391461	0.695457	0.999806
YGL191W	8.81919	0.115351	1.17793	0.0979265	0.921991	0.999806
YGL194C	12.3445	1.6236	1.00687	1.61253	0.106848	0.999806
YGL193C	11.608	-0.308476	1.00237	-0.307747	0.758275	0.999806
YGL195W	70.8027	0.110458	0.437086	0.252714	0.800489	0.999806
YGL194C-A	1.2581	-0.143459	3.59569	-0.0398976	0.968175	0.999806
YIL046W	11.6993	-0.859124	1.02147	-0.841064	0.400312	0.999806
YIL046W-A	38.2531	0.0583994	0.580643	0.100577	0.919886	0.999806
YIL044C	13.2363	-1.07216	0.959025	-1.11797	0.263578	0.999806
YIL045W	21.7623	-0.364621	0.760035	-0.479743	0.63141	0.999806
YIL042C	15.6737	-0.310517	0.869708	-0.357036	0.721065	0.999806
YIL043C	24.4636	-0.534986	0.719861	-0.74318	0.457372	0.999806
YGL188C-A	0.973014	1.48712	4.4059	0.337529	0.735718	0.999806
YGL187C	5.916	0.585659	1.44082	0.406477	0.684392	0.999806
YDR534C	10.1773	0.309363	1.06519	0.290429	0.771488	0.999806
YDR536W	22.4882	0.529096	0.7453	0.709909	0.47776	0.999806
YDR532C	3.18733	-1.14351	2.17227	-0.526411	0.598602	0.999806
YDR533C	17.5082	-0.449171	0.830146	-0.541075	0.588456	0.999806
YDR540C	4.44638	-1.24358	1.81419	-0.685474	0.493045	0.999806
YDR541C	19.3701	0.0607339	0.790381	0.0768412	0.93875	0.999806
YDR538W	4.28243	2.15261	1.86409	1.15478	0.248181	0.999806
YDR539W	20.7282	0.162352	0.764727	0.212301	0.831872	0.999806
YPR055W	12.7661	-0.504039	0.957567	-0.526375	0.598628	0.999806
YPR054W	21.8915	0.152244	0.74676	0.203872	0.838453	0.999806
YDR542W	2.51621	-0.143166	2.44417	-0.0585746	0.953291	0.999806
YCL027W	24.1785	-0.452953	0.720996	-0.628233	0.529851	0.999806
YML046W	4.44015	-1.71472	1.82495	-0.939599	0.347423	0.999806
YML045W	1.54319	-1.7712	3.39627	-0.521513	0.602009	0.999806
YOR260W	12.2012	0.0197315	0.970217	0.0203372	0.983774	0.999806
YPR061C	14.6997	-0.353802	0.912539	-0.387711	0.69823	0.999806
YDL215C	65.8439	-0.0262869	0.454187	-0.0578767	0.953847	0.999806
YCR067C	29.8094	-0.163341	0.651108	-0.250866	0.801918	0.999806
YNL236W	22.7425	-0.278789	0.739576	-0.376957	0.706205	0.999806
YCR066W	12.3792	-0.316634	0.987371	-0.320684	0.74845	0.999806
YPR174C	6.48618	-0.00459981	1.35721	-0.00338916	0.997296	0.999806
YNL237W	17.624	0.149091	0.829674	0.179699	0.857389	0.999806
YCR069W	18.0889	-0.348848	0.81968	-0.42559	0.670407	0.999806
YCL034W	32.1911	-0.632501	0.641117	-0.986561	0.323858	0.999806
YNL234W	20.5263	0.0699822	0.773542	0.0904698	0.927914	0.999806
YMR053C	28.8628	0.21503	0.665941	0.322896	0.746774	0.999806
YNL232W	3.29356	0.143735	2.07859	0.06915	0.94487	0.999806
YNL231C	41.6582	0.207119	0.558359	0.370942	0.710681	0.999806
YNL230C	38.7046	-0.193725	0.585425	-0.330914	0.74071	0.999806
YNL229C	1.55471	0.980513	3.43707	0.285276	0.775433	0.999806
YNL227C	18.5936	-0.0570365	0.8164	-0.0698634	0.944302	0.999806
YMR052W	7.17939	0.787731	1.27617	0.617264	0.537061	0.999806
YDR208W	17.3337	0.11174	0.830566	0.134534	0.89298	0.999806
YDR210W	2.22583	-0.495525	2.65595	-0.186571	0.851997	0.999806
YDR206W	14.141	0.171434	0.906632	0.189089	0.850023	0.999806
YDR207C	13.532	-0.727438	0.94064	-0.773344	0.439319	0.999806
YDR204W	8.15863	0.991906	1.2302	0.806297	0.420072	0.999806
YDR205W	24.2876	-0.477464	0.743186	-0.642455	0.520578	0.999806
YDR201W	1.64942	0.857475	3.10977	0.275736	0.782751	0.999806
YDR202C	5.34488	1.51825	1.57577	0.963495	0.335299	0.999806
YMR036C	14.342	0.394411	0.902397	0.43707	0.66206	0.999806
YMR037C	13.3469	-0.363958	0.944217	-0.38546	0.699897	0.999806
YMR038C	22.0334	-1.04749	0.767465	-1.36487	0.172294	0.999806
YMR039C	10.9369	-0.065931	1.02762	-0.0641592	0.948843	0.999806
YMR040W	13.168	0.0597182	0.938642	0.0636219	0.949271	0.999806
YMR041C	7.36448	0.235793	1.25784	0.187458	0.851301	0.999806
YDR421W	34.6649	-0.0837972	0.618158	-0.135559	0.89217	0.999806
YDR422C	29.6377	0.0122547	0.665624	0.0184109	0.985311	0.999806
YDR419W	24.5068	0.273711	0.719345	0.3805	0.703574	0.999806
YDR420W	38.0362	0.680083	0.622038	1.09331	0.274256	0.999806
YDR416W	9.69654	0.419297	1.10039	0.381045	0.70317	0.999806
YDR418W	2.8013	-0.904939	2.33844	-0.386984	0.698768	0.999806
YAL058W	28.646	-0.16923	0.664129	-0.254815	0.798866	0.999806
YDR415C	13.8569	0.202915	0.924703	0.219438	0.826309	0.999806
YDR411C	24.5202	0.303935	0.716767	0.424036	0.67154	0.999806
YAL061W	74.6949	-0.30431	0.426498	-0.713509	0.475531	0.999806
YMR163C	9.12542	0.950622	1.12551	0.844615	0.398326	0.999806
YNL247W	5.52468	0.34511	1.50588	0.229174	0.818733	0.999806
YNL246W	10.4835	1.02916	1.05016	0.980004	0.327084	0.999806
YMR047C	16.7361	-0.356674	0.845606	-0.421796	0.673174	0.999806
YPL056C	26.6028	-0.595355	0.713518	-0.834395	0.404059	0.999806
YHR142W	12.2926	-0.450062	1.01827	-0.441989	0.658497	0.999806
YNL253W	17.8985	-0.24931	0.824268	-0.302462	0.7623	0.999806
YNL252C	5.60788	-0.350668	1.52701	-0.229644	0.818369	0.999806
YNL255C	5.13865	0.525773	1.5766	0.333485	0.738768	0.999806
YMR046C	15.3833	-0.365949	0.877951	-0.416822	0.676808	0.999806
YNL249C	13.6761	0.765299	0.927113	0.825465	0.409108	0.999806
YHR139C	9.78069	-0.100104	1.09314	-0.091574	0.927036	0.999806
YNL251C	17.6427	0.329649	0.839177	0.392824	0.69445	0.999806
YNL250W	26.2885	-0.928496	0.702672	-1.32138	0.186375	0.999806
YER030W	0.866784	-3.58748	4.90162	-0.731895	0.464233	0.999806
YER031C	11.4912	-1.28018	1.0369	-1.23463	0.216969	0.999806
YER028C	21.4825	-0.149026	0.762061	-0.195556	0.844957	0.999806
YER029C	3.48394	-0.365743	2.0245	-0.180659	0.856635	0.999806
YER026C	1.63885	-4.51861	3.74507	-1.20655	0.227606	0.999806
YER027C	18.7557	-0.750186	0.81238	-0.923442	0.355777	0.999806
YER024W	48.293	-0.0787328	0.537416	-0.146503	0.883525	0.999806
YNL067W	8.90767	-0.0267747	1.13162	-0.0236604	0.981123	0.999806
YHR144C	9.47785	-0.441779	1.10558	-0.399591	0.689457	0.999806
YCL032W	27.5226	-1.20424	0.700935	-1.71805	0.0857868	0.999806
YAL040C	14.5944	-0.755503	0.909997	-0.830226	0.406411	0.999806
YER032W	24.0217	0.159716	0.715729	0.223152	0.823417	0.999806
YER033C	24.2785	-0.340955	0.723363	-0.471348	0.637392	0.999806
YAL039C	39.7069	0.0729259	0.570642	0.127796	0.89831	0.999806
YHR143W	5.82034	0.843766	1.46635	0.575418	0.565009	0.999806
YNL041C	18.2961	-0.0817376	0.809458	-0.100978	0.919568	0.999806
YOR304W	31.8168	2.00703	0.678909	2.95625	0.00311404	0.931916
YHR132C	30.9843	-0.0357404	0.640494	-0.0558014	0.9555	0.999806
YPL116W	16.0144	0.853365	0.86721	0.984034	0.325099	0.999806
YOR304C-A	2.71715	1.04417	2.36732	0.441074	0.659159	0.999806
YLL055W	10.0888	0.427586	1.14636	0.372995	0.709152	0.999806
YMR055C	22.3829	0.324311	0.7393	0.438674	0.660898	0.999806
YLL056C	7.95769	0.638564	1.25157	0.510211	0.609904	0.999806
YMR054W	40.3769	0.874088	0.576965	1.51498	0.129778	0.999806
YOR250C	7.64428	-0.357251	1.23717	-0.288765	0.772761	0.999806
YLL057C	24.0289	0.14777	0.732635	0.201697	0.840154	0.999806
YHR215W	4.9377	-0.11362	1.62264	-0.0700217	0.944176	0.999806
YBR132C	29.3402	-0.00233164	0.655781	-0.00355552	0.997163	0.999806
YBR131W	13.168	0.0597182	0.938642	0.0636219	0.949271	0.999806
YBR130C	4.16035	-0.348394	1.80955	-0.192531	0.847327	0.999806
YBR129C	6.20638	0.665849	1.39614	0.47692	0.633419	0.999806
YBR137W	7.38128	0.994643	1.29039	0.770807	0.440821	0.999806
YBR136W	31.2199	-0.831996	0.646433	-1.28706	0.198075	0.999806
YBR133C	34.5956	0.31929	0.607523	0.52556	0.599194	0.999806
YBR139W	29.0532	0.15679	0.662109	0.236804	0.812809	0.999806
YBR138C	21.294	-0.204509	0.760143	-0.26904	0.787899	0.999806
YPL117C	6.67656	-0.269567	1.33535	-0.20187	0.840019	0.999806
YPL265W	39.4324	0.244077	0.571866	0.426808	0.669519	0.999806
YDR098C	6.49147	0.376842	1.3602	0.27705	0.781742	0.999806
YDR093W	96.2605	0.078882	0.377079	0.209192	0.834298	0.999806
YER133W	6.47033	-1.49396	1.42261	-1.05016	0.293646	0.999806
YER134C	8.61107	-0.249013	1.15727	-0.215172	0.829633	0.999806
YER127W	0.772069	-3.44129	5.60678	-0.613773	0.539365	0.999806
YER128W	12.3978	-0.0267394	0.981139	-0.0272534	0.978258	0.999806
YER125W	12.8608	-0.514298	0.957172	-0.53731	0.591053	0.999806
YER126C	5.51317	-0.325201	1.52049	-0.21388	0.830641	0.999806
YER131W	0.777354	0.903804	4.92745	0.183422	0.854467	0.999806
YER132C	67.0973	0.0759233	0.458173	0.165709	0.868386	0.999806
YER129W	46.5287	-0.377813	0.533956	-0.707572	0.479211	0.999806
YER130C	32.0992	-0.785757	0.644722	-1.21875	0.222938	0.999806
YLR351C	13.0026	0.530252	1.81874	0.291549	0.770632	0.999806
YOL021C	18.7663	-0.427754	0.804682	-0.531581	0.595016	0.999806
YNL039W	9.89126	0.625653	1.07268	0.583262	0.559717	0.999806
YMR307W	5.21751	-1.11905	1.60331	-0.697962	0.485201	0.999806
YHR140W	18.984	0.106509	0.796122	0.133785	0.893572	0.999806
YLR352W	36.1009	-0.200265	0.597617	-0.335106	0.737545	0.999806
YPL109C	37.9546	0.0847171	0.590983	0.143349	0.886014	0.999806
YPL262W	11.8099	-0.12461	0.986543	-0.12631	0.899487	0.999806
YPR074C	11.1273	-0.224547	1.01819	-0.220536	0.825454	0.999806
YLR271W	6.98279	0.894911	1.35147	0.662174	0.50786	0.999806
YPR173C	3.38394	-1.2735	2.17076	-0.586662	0.55743	0.999806
YDR096W	17.2086	1.68956	0.86654	1.94978	0.0512029	0.999806
YMR026C	3.7796	0.513431	1.92355	0.266918	0.789532	0.999806
YMR215W	12.6156	0.686246	0.991562	0.692086	0.488883	0.999806
YLR270W	6.88373	0.387334	1.31811	0.293856	0.768868	0.999806
YNL291C	47.44	-2.31703	0.604273	-3.83441	0.000125864	0.0894576
YNL213C	1.16867	1.9006	4.02702	0.471961	0.636955	0.999806
YMR206W	22.2872	0.392236	0.74531	0.526272	0.598699	0.999806
YKR017C	9.32108	1.01189	1.11462	0.907832	0.363967	0.999806
YMR208W	12.7599	-0.612134	0.969077	-0.631667	0.527604	0.999806
YMR209C	16.0818	0.19822	0.855895	0.231594	0.816853	0.999806
YMR210W	22.0536	-0.394689	0.750419	-0.525958	0.598918	0.999806
YMR211W	5.11751	-1.96103	1.71726	-1.14195	0.253475	0.999806
YMR212C	8.62258	0.182771	1.1517	0.158696	0.873908	0.999806
YKR018C	25.5197	0.809034	0.699889	1.15595	0.247703	0.999806
YNL038W	5.80354	-0.180112	1.4898	-0.120896	0.903773	0.999806
YMR306W	56.4041	-0.329876	0.486769	-0.677685	0.497971	0.999806
YNL263C	8.51012	-0.380515	1.17647	-0.323438	0.746364	0.999806
YLR108C	14.5439	0.511926	0.896193	0.571223	0.567848	0.999806
YLR357W	15.9808	0.140183	0.857978	0.163387	0.870213	0.999806
YAL064W	1.83451	-2.0782	3.14229	-0.661365	0.508378	0.999806
YPL110C	46.5791	0.0433351	0.530049	0.0817568	0.93484	0.999806
YPL263C	26.3476	0.195709	0.686699	0.285	0.775644	0.999806
YPR075C	6.39147	0.0176531	1.36873	0.0128975	0.98971	0.999806
YLR358C	5.34582	1.25107	1.59827	0.782764	0.433766	0.999806
YDL072C	8.24183	0.578585	1.17832	0.491024	0.623409	0.999806
YJL051W	30.9338	0.509728	0.649918	0.784296	0.432866	0.999806
YMR025W	5.25016	1.55689	1.58571	0.981825	0.326186	0.999806
YNL261W	1.73885	-0.769778	3.06714	-0.250976	0.801833	0.999806
YBR004C	3.58394	0.320141	1.98567	0.161226	0.871916	0.999806
YBR003W	14.5261	0.205178	0.908254	0.225903	0.821277	0.999806
YBR002C	9.10239	0.220535	1.13698	0.193965	0.846203	0.999806
YBR001C	111.403	-0.13494	0.353556	-0.381665	0.70271	0.999806
YBL001C	33.8448	-0.412495	0.638032	-0.646511	0.517948	0.999806
YBL002W	17.3505	0.452187	0.827258	0.54661	0.584647	0.999806
YBL003C	14.9848	-0.487193	0.912026	-0.534188	0.593211	0.999806
YBL004W	17.2063	-0.763709	0.843217	-0.905709	0.36509	0.999806
YDL084W	2.70035	-1.54	2.50441	-0.614915	0.538611	0.999806
YMR243C	23.5463	0.307026	0.722027	0.425228	0.67067	0.999806
YGR222W	4.1762	1.39319	1.86483	0.747086	0.455012	0.999806
YKR019C	25.0855	1.75737	0.757916	2.31869	0.020412	0.999806
YBR006W	56.38	0.220047	0.48455	0.454127	0.649738	0.999806
YBR005W	13.9516	0.19224	0.914604	0.210189	0.83352	0.999806
YHR146W	10.859	0.496248	1.02523	0.484035	0.628361	0.999806
YOL082W	12.5199	0.804672	0.973237	0.826799	0.408351	0.999806
YOL081W	33.6448	-0.578632	0.62773	-0.921786	0.35664	0.999806
YOL084W	51.423	0.00424971	0.51253	0.00829163	0.993384	0.999806
YOL083W	12.0435	1.21083	0.985364	1.22882	0.21914	0.999806
YOL086W-A	10.1763	0.44349	1.05862	0.418933	0.675265	0.999806
YOL086C	2.41526	-0.619159	2.56761	-0.241142	0.809445	0.999806
YLR268W	6.66599	-1.23107	1.37834	-0.893154	0.371775	0.999806
YJL050W	17.5923	-0.806238	0.836055	-0.964336	0.334877	0.999806
YOL077W-A	6.19581	-0.119724	1.39812	-0.0856323	0.931759	0.999806
YLR267W	14.751	0.778739	0.904561	0.860903	0.389291	0.999806
YPR141C	14.4093	-0.414764	0.91294	-0.454317	0.649601	0.999806
YPL186C	29.8589	0.491121	0.648858	0.7569	0.44911	0.999806
YAL020C	19.0576	-0.462064	0.802435	-0.575828	0.564732	0.999806
YGR223C	10.9484	0.264009	1.01949	0.258961	0.795665	0.999806
YDL065C	15.3948	-0.110711	0.880568	-0.125726	0.899949	0.999806
YNL044W	8.51635	-0.233172	1.16161	-0.200732	0.840909	0.999806
YPL224C	32.9453	0.332734	0.620997	0.535807	0.592092	0.999806
YCR030C	38.1061	-0.37456	0.596667	-0.627753	0.530166	0.999806
YOL125W	27.3802	-0.541035	0.706501	-0.765795	0.443798	0.999806
YPL112C	6.00637	-0.0721307	1.46828	-0.049126	0.960819	0.999806
YOR229W	48.4391	0.270756	0.522232	0.51846	0.604138	0.999806
YOR011W	40.3267	-0.452428	0.576966	-0.78415	0.432952	0.999806
YPL222W	31.1862	0.0281826	0.644442	0.0437317	0.965118	0.999806
YPR140W	13.4391	-0.980649	0.979318	-1.00136	0.316653	0.999806
YKL205W	20.8132	-0.158653	0.769466	-0.206186	0.836646	0.999806
YKL206C	8.91296	0.253565	1.12959	0.224474	0.822388	0.999806
YKL207W	12.2844	-0.305333	0.979976	-0.311572	0.755366	0.999806
YBL088C	83.893	-0.263879	0.403822	-0.653454	0.513464	0.999806
YKL209C	60.1847	-0.296854	0.471793	-0.629205	0.529215	0.999806
YKL210W	17.4116	-0.26546	0.844734	-0.314253	0.753329	0.999806
YKL211C	6.01166	0.335804	1.4547	0.23084	0.817439	0.999806
YKL212W	10.9263	-0.576962	1.03266	-0.558713	0.576358	0.999806
YBL092W	1.06244	-1.14395	4.01049	-0.28524	0.77546	0.999806
YBL093C	6.87222	-0.132042	1.30954	-0.10083	0.919685	0.999806
YBL095W	14.9193	0.123041	0.892901	0.137799	0.8904	0.999806
YBL097W	20.8681	-0.937492	0.785772	-1.19308	0.232836	0.999806
YBL089W	13.4444	-0.734556	0.967184	-0.759479	0.447566	0.999806
YBL090W	6.39147	0.0176531	1.36873	0.0128975	0.98971	0.999806
YBL091C	20.8334	0.388717	0.76792	0.506195	0.61272	0.999806
YBL091C-A	12.3907	-0.00330864	0.968531	-0.00341614	0.997274	0.999806
YNL005C	11.0263	-0.32445	1.03157	-0.31452	0.753126	0.999806
YNL004W	75.2785	-0.341918	0.427745	-0.799349	0.424088	0.999806
YPL226W	11.6301	0.443461	0.993159	0.446516	0.655225	0.999806
YDL017W	13.4541	-0.188996	0.930378	-0.203139	0.839026	0.999806
YDR071C	7.74428	-0.0264911	1.22234	-0.0216725	0.982709	0.999806
YNL011C	3.48394	-0.365743	2.0245	-0.180659	0.856635	0.999806
YNL010W	15.1088	0.103654	0.879675	0.117832	0.906201	0.999806
YNL014W	29.0781	0.304061	0.674221	0.450981	0.652003	0.999806
YNL012W	49.1459	-0.342037	0.51943	-0.658486	0.510226	0.999806
YNL007C	2.13017	0.232948	2.70728	0.086045	0.931431	0.999806
YNL006W	2.80658	0.120718	2.33467	0.0517066	0.958763	0.999806
YNL009W	34.602	-0.77139	0.617898	-1.24841	0.211881	0.999806
YNL008C	28.547	-0.311109	0.668175	-0.46561	0.641494	0.999806
YDL245C	4.14883	-1.58897	1.90811	-0.832748	0.404987	0.999806
YDR081C	6.48184	-0.668323	1.3992	-0.477645	0.632903	0.999806
YNL042W	19.1576	-0.320847	0.795813	-0.403169	0.686824	0.999806
YPL177C	10.3835	0.825821	1.05177	0.785171	0.432353	0.999806
YOR009W	2.42678	0.89557	2.5062	0.357342	0.720836	0.999806
YOR226C	12.3969	0.0868221	0.962619	0.0901937	0.928133	0.999806
YPL184C	11.4513	0.8734	1.00221	0.871476	0.383494	0.999806
YPL221W	52.3774	-0.0294692	0.50189	-0.0587165	0.953178	0.999806
YDL070W	13.5612	-0.0263025	0.951726	-0.0276366	0.977952	0.999806
YKL101W	43.8408	-0.264097	0.550137	-0.480058	0.631186	0.999806
YKL103C	30.5626	0.811476	0.643755	1.26053	0.207477	0.999806
YKL107W	10.3826	0.958003	1.06385	0.900505	0.367851	0.999806
YKL108W	7.34768	-0.664202	1.27232	-0.522041	0.601642	0.999806
YKL109W	37.905	0.492168	0.58223	0.845314	0.397935	0.999806
YKL110C	6.3809	-0.881064	1.40252	-0.628202	0.529872	0.999806
YKL104C	14.0171	-0.452907	0.954236	-0.474628	0.635052	0.999806
YKL105C	43.1625	-0.195925	0.550216	-0.356087	0.721776	0.999806
YKL106W	7.86203	0.826276	1.22493	0.674548	0.499963	0.999806
YKL106C-A	4.54015	-0.850864	1.75252	-0.485508	0.627316	0.999806
YML054C-A	18.3821	-0.555582	0.836529	-0.664152	0.506593	0.999806
YBR239C	35.5856	-0.517045	0.607219	-0.851496	0.394494	0.999806
YDL047W	5.71506	0.0475816	1.47891	0.0321735	0.974334	0.999806
YIL108W	35.1322	-0.138454	0.605863	-0.228524	0.819239	0.999806
YPL108W	19.3638	0.00275703	0.789324	0.0034929	0.997213	0.999806
YPR073C	12.4075	0.47767	0.962011	0.496533	0.619518	0.999806
YKR068C	14.3135	2.08428	0.956318	2.17948	0.0292957	0.999806
YKR067W	57.3077	0.572733	0.4814	1.18972	0.234156	0.999806
YKR066C	29.3257	1.16268	0.662792	1.75421	0.0793946	0.999806
YKR065C	5.26167	2.2429	3.14564	0.713018	0.475835	0.999806
YKR072C	36.73	1.30281	0.605804	2.15055	0.0315115	0.999806
YKR071C	14.1905	1.45812	0.920291	1.58442	0.113099	0.999806
YKR070W	17.8744	1.35116	0.836667	1.61493	0.106325	0.999806
YKR069W	40.8779	1.09901	0.566618	1.9396	0.0524283	0.999806
YLR392C	19.3638	0.00275703	0.789324	0.0034929	0.997213	0.999806
YLR390W-A	6.40298	0.55689	1.3979	0.398377	0.690352	0.999806
YKR075C	28.1685	1.24424	0.67362	1.8471	0.0647331	0.999806
YKR074W	9.62825	1.62749	1.11804	1.45567	0.145483	0.999806
YAL013W	4.6579	0.769092	1.68856	0.455472	0.648769	0.999806
YBR230W-A	22.6564	0.0856821	0.742736	0.11536	0.90816	0.999806
YDL064W	5.90449	-0.00261118	1.44798	-0.00180333	0.998561	0.999806
YLL029W	77.6119	0.28133	0.417255	0.674239	0.500159	0.999806
YBR231C	8.52258	-0.0938425	1.17753	-0.0796942	0.93648	0.999806
YDL102W	15.8693	-0.249106	0.864076	-0.288292	0.773123	0.999806
YBR233W	11.1546	0.751947	1.01513	0.740737	0.458853	0.999806
YHR163W	5.63091	0.904129	1.50534	0.600617	0.548095	0.999806
YHR164C	158.148	-4.82912	0.481365	-10.0321	1.10106e-23	3.13032e-20
YHR166C	17.9029	-0.0195404	0.848983	-0.0230162	0.981637	0.999806
YHR159W	24.0944	-0.215477	0.719148	-0.299628	0.764461	0.999806
YHR160C	5.50165	-1.19051	1.59477	-0.746506	0.455362	0.999806
YHR161C	38.9224	0.0604112	0.581004	0.103977	0.917187	0.999806
YHR162W	3.56808	-3.1119	2.35586	-1.32092	0.186528	0.999806
YJL053W	7.16259	-0.026466	1.28283	-0.0206309	0.98354	0.999806
YJL054W	11.5912	-0.966329	1.02938	-0.93875	0.347859	0.999806
YJL055W	5.35111	1.68377	1.60167	1.05126	0.293139	0.999806
YJL056C	16.5572	-0.0181169	0.84578	-0.0214204	0.98291	0.999806
YHR167W	7.16882	0.129059	1.27819	0.10097	0.919574	0.999806
YHR168W	8.53315	0.478926	1.16386	0.411497	0.680708	0.999806
YJL059W	14.2305	-0.0164857	0.906982	-0.0181764	0.985498	0.999806
YJL060W	15.6914	0.00946516	0.880335	0.0107518	0.991421	0.999806
YML100W-A	18.9629	-0.454943	0.808393	-0.562775	0.573588	0.999806
YLR251W	5.62468	0.736437	1.49774	0.491698	0.622933	0.999806
YIL107C	36.7522	0.635246	0.592462	1.07221	0.283624	0.999806
YLR219W	18.2076	-0.0109337	0.820757	-0.0133215	0.989371	0.999806
YLR218C	12.218	0.502703	0.974862	0.515666	0.606088	0.999806
YLR216C	6.48712	-0.227443	1.37893	-0.164942	0.86899	0.999806
YLR215C	1.94603	1.55773	3.05231	0.510344	0.60981	0.999806
YLR214W	27.8402	0.706239	0.671548	1.05166	0.292956	0.999806
YLR213C	34.886	0.335869	0.604452	0.555659	0.578444	0.999806
YLR212C	4.06563	-0.313715	1.84979	-0.169595	0.865328	0.999806
YLR211C	3.57865	-0.406102	1.988	-0.204277	0.838137	0.999806
YLR210W	10.5528	-0.261401	1.06577	-0.24527	0.806247	0.999806
YLR209C	10.5571	0.119638	1.03802	0.115255	0.908243	0.999806
YCL039W	45.7274	-0.558114	0.556479	-1.00294	0.315891	0.999806
YOR239W	19.7172	-0.840273	0.795691	-1.05603	0.290955	0.999806
YDR049W	6.67033	-0.462834	1.36487	-0.339105	0.734531	0.999806
YCL040W	112.7	-0.821623	0.355094	-2.31382	0.0206777	0.999806
YPR004C	6.68184	0.121071	1.33124	0.090946	0.927535	0.999806
YCL037C	4.55167	0.0665207	1.70333	0.0390532	0.968848	0.999806
YDR084C	3.20413	0.914259	2.14168	0.426888	0.669461	0.999806
YNL037C	11.2388	0.317811	1.00913	0.314935	0.752811	0.999806
YMR313C	11.9382	0.844236	0.991009	0.851895	0.394272	0.999806
YGL124C	14.0357	-0.181985	0.914081	-0.199091	0.842192	0.999806
YGL125W	57.5717	0.377393	0.481112	0.784418	0.432795	0.999806
YGL126W	132.393	-0.23438	0.326605	-0.717626	0.472988	0.999806
YGL127C	5.61411	-0.129784	1.49098	-0.0870463	0.930635	0.999806
YIL122W	6.51355	1.59685	1.38151	1.15587	0.247733	0.999806
YIL121W	37.4503	-0.354615	0.599353	-0.591663	0.554076	0.999806
YIL124W	7.1741	0.464655	1.27442	0.364601	0.71541	0.999806
YGR193C	9.30428	0.414079	1.10499	0.374737	0.707856	0.999806
YIL126W	35.5467	-1.06187	0.621126	-1.70958	0.0873431	0.999806
YIL125W	69.4811	0.951722	0.456483	2.0849	0.0370784	0.999806
YIL128W	12.296	0.00820166	0.967152	0.00848022	0.993234	0.999806
YIL127C	1.35905	0.5696	3.69389	0.154201	0.877451	0.999806
YGL121C	7.1741	0.464655	1.27442	0.364601	0.71541	0.999806
YGL122C	5.60883	-0.633894	1.50662	-0.42074	0.673945	0.999806
YDL113C	16.2731	0.00833111	0.870078	0.00957513	0.99236	0.999806
YPL279C	6.37995	-0.612371	1.39021	-0.440489	0.659583	0.999806
YML062C	15.3833	-0.365949	0.877951	-0.416822	0.676808	0.999806
YPL277C	15.3035	0.246859	0.882849	0.279616	0.779772	0.999806
YIL102C-A	4.25072	-1.6579	1.90077	-0.872226	0.383085	0.999806
YHL025W	35.3529	-1.21645	0.619385	-1.96396	0.0495349	0.999806
YHL024W	56.4873	-0.405253	0.489459	-0.827962	0.407692	0.999806
YHL027W	41.2058	0.457156	0.57007	0.801929	0.422594	0.999806
YHL026C	24.291	-0.2378	0.715125	-0.332529	0.73949	0.999806
YHL029C	24.4015	0.0776089	0.712893	0.108865	0.91331	0.999806
YHL028W	35.6697	-0.692057	0.609134	-1.13613	0.255901	0.999806
YHL031C	5.9992	-0.0274792	1.45556	-0.0188788	0.984938	0.999806
YHL030W	68.9948	-0.194746	0.446752	-0.435916	0.662898	0.999806
YHL033C	2.32583	0.556193	2.57706	0.215825	0.829124	0.999806
YHL032C	43.5663	-0.098957	0.55018	-0.179863	0.85726	0.999806
YJR126C	29.2507	0.0888976	0.657518	0.135202	0.892452	0.999806
YIL104C	12.2897	-0.0854329	0.98207	-0.0869927	0.930677	0.999806
YJR124C	16.5688	0.199279	0.850692	0.234255	0.814787	0.999806
YJR123W	0.386035	-2.53664	6.1141	-0.414884	0.678227	0.999806
YJR131W	20.4387	0.0630511	0.780754	0.0807567	0.935635	0.999806
YJR130C	22.7468	-0.0965351	0.735776	-0.131202	0.895616	0.999806
YJR129C	51.2327	0.0373006	0.512288	0.0728117	0.941956	0.999806
YIL105W-A	3.69017	1.18039	1.95755	0.602995	0.546512	0.999806
YNL284C	2.32583	0.556193	2.57706	0.215825	0.829124	0.999806
YJR133W	8.43221	0.378618	1.16328	0.325474	0.744823	0.999806
YJR132W	12.3907	-0.00330864	0.968531	-0.00341614	0.997274	0.999806
YIL105C	43.2236	-0.519471	0.557254	-0.932197	0.351235	0.999806
YPL045W	7.46448	0.536618	1.24671	0.430427	0.666885	0.999806
YPL183C	24.9534	-0.712374	0.738394	-0.964761	0.334665	0.999806
YIL106W	3.09262	-1.10177	2.2133	-0.497793	0.61863	0.999806
YOR133W	3.96997	0.0797538	1.85614	0.0429675	0.965727	0.999806
YGR184C	61.5849	0.641611	0.46557	1.37812	0.168166	0.999806
YOR136W	4.85884	1.36459	1.65678	0.823641	0.410144	0.999806
YOR137C	19.2859	0.322115	0.791842	0.406792	0.684161	0.999806
YOR138C	53.8994	-0.264198	0.496525	-0.532094	0.594661	0.999806
YOR140W	11.9046	-0.136243	0.983328	-0.138553	0.889803	0.999806
YOR141C	17.1433	0.209849	0.836587	0.25084	0.801938	0.999806
YGL207W	17.9985	-0.107702	0.83097	-0.129611	0.896875	0.999806
YDL105W	2.99696	-0.489212	2.22561	-0.21981	0.826019	0.999806
YNL021W	15.6548	1.66742	0.888908	1.87581	0.0606817	0.999806
YIL109C	23.603	-0.408598	0.726117	-0.562716	0.573628	0.999806
YNL284C-A	16.5688	0.199279	0.850692	0.234255	0.814787	0.999806
YDL106C	12.2065	0.22384	0.968559	0.231107	0.817232	0.999806
YLR065C	1.45376	0.441979	3.32188	0.133051	0.894153	0.999806
YIL110W	3.7796	0.513431	1.92355	0.266918	0.789532	0.999806
YGR126W	6.39147	0.0176531	1.36873	0.0128975	0.98971	0.999806
YGR127W	16.6759	0.317641	0.883384	0.359574	0.719166	0.999806
YGR124W	40.3116	0.247974	0.574732	0.431461	0.666133	0.999806
YGR125W	24.6255	0.490312	0.708969	0.691584	0.489199	0.999806
YGR130C	32.1688	0.274052	0.627544	0.436706	0.662325	0.999806
YGR131W	9.86389	-0.522693	1.0838	-0.482279	0.629607	0.999806
YGR128C	1.54942	-0.59345	3.49754	-0.169676	0.865265	0.999806
YGR129W	8.7341	0.819649	1.14904	0.713331	0.475641	0.999806
YDL073W	11.1494	0.543631	1.0117	0.537347	0.591028	0.999806
YPL250C	17.5312	-0.00216984	0.839556	-0.00258451	0.997938	0.999806
YGR132C	14.141	0.171434	0.906632	0.189089	0.850023	0.999806
YGR133W	7.47071	0.666429	1.25842	0.529578	0.596405	0.999806
YDR106W	9.31579	0.767703	1.11483	0.688629	0.491057	0.999806
YCR028C	9.95766	-0.377221	1.11923	-0.337036	0.73609	0.999806
YGL201C	30.1892	-0.231365	0.650294	-0.355785	0.722002	0.999806
YGR138C	12.2128	0.309482	0.978115	0.316406	0.751694	0.999806
YGR134W	28.8594	0.0323484	0.661749	0.0488832	0.961012	0.999806
YGR135W	1.64414	-0.686413	3.13936	-0.218647	0.826925	0.999806
YGR142W	9.09805	-0.219418	1.12317	-0.195356	0.845114	0.999806
YGL206C	34.7515	-0.0393985	0.610422	-0.0645431	0.948538	0.999806
YGR140W	9.47785	-0.441779	1.10558	-0.399591	0.689457	0.999806
YGR141W	34.5673	0.0429897	0.608424	0.0706574	0.94367	0.999806
YJL082W	22.2661	-0.0524785	0.741874	-0.0707377	0.943606	0.999806
YIL051C	1.45376	0.441979	3.32188	0.133051	0.894153	0.999806
YGR144W	14.041	0.00355916	0.910647	0.00390839	0.996882	0.999806
YGR145W	8.62787	0.461031	1.14946	0.401085	0.688357	0.999806
YGL196W	18.4129	0.375519	0.80583	0.466003	0.641214	0.999806
YGL197W	31.1298	1.89161	0.667704	2.83301	0.0046112	0.999806
YIL054W	37.0393	-0.474374	0.595846	-0.796134	0.425954	0.999806
YIL053W	16.8352	-0.113868	0.867075	-0.131324	0.895519	0.999806
YDR524C	14.0675	0.852907	0.916459	0.930655	0.352032	0.999806
YDR523C	17.5337	0.375085	0.851814	0.440337	0.659693	0.999806
YDR524C-B	3.38922	-0.323149	2.10306	-0.153657	0.87788	0.999806
YDR524W-C	0.866784	-3.58748	4.90162	-0.731895	0.464233	0.999806
YDR527W	20.0191	-0.554953	0.784374	-0.707511	0.479249	0.999806
YDR525W-A	25.6438	-0.238518	0.697454	-0.341983	0.732363	0.999806
YDR529C	1.55999	2.48267	3.50071	0.70919	0.478206	0.999806
YDR528W	13.0839	0.443416	0.940591	0.471423	0.637339	0.999806
YDR531W	5.99392	-0.487357	1.45159	-0.33574	0.737067	0.999806
YDR530C	30.6256	0.349392	0.642742	0.543595	0.58672	0.999806
YPR072W	8.72258	0.443481	1.14446	0.387504	0.698383	0.999806
YLR070C	23.8534	0.572139	0.718453	0.796349	0.425829	0.999806
YPR066W	16.637	-0.618257	0.865065	-0.714695	0.474798	0.999806
YPR067W	5.31222	-1.14304	1.58756	-0.719996	0.471527	0.999806
YPR068C	28.0085	0.359937	0.668049	0.538789	0.590033	0.999806
YBR128C	16.8846	1.01028	0.868962	1.16263	0.244981	0.999806
YNL023C	25.911	0.85554	0.695522	1.23007	0.218671	0.999806
YJL062W	26.4736	-1.14576	0.708016	-1.61827	0.105604	0.999806
YJL061W	2.22055	-2.38645	2.9043	-0.821695	0.41125	0.999806
YOR258W	2.23112	0.633246	2.62356	0.241369	0.809269	0.999806
YOR259C	10.8316	-0.565054	1.0363	-0.545261	0.585574	0.999806
YJL069C	9.66823	-0.638202	1.09794	-0.581273	0.561056	0.999806
YJL068C	15.4054	0.216276	0.874102	0.247427	0.804578	0.999806
YJL071W	13.655	0.0663344	0.920878	0.0720339	0.942575	0.999806
YJL070C	20.6166	-0.132068	0.768362	-0.171882	0.86353	0.999806
YJL063C	3.6796	-0.10317	1.95233	-0.0528445	0.957856	0.999806
YJL062W-A	4.8545	0.660672	3.6995	0.178584	0.858264	0.999806
YJL066C	20.845	0.550449	0.763463	0.72099	0.470916	0.999806
YJL065C	13.3565	0.141839	0.998982	0.141984	0.887093	0.999806
YNL238W	14.7174	-0.00736156	0.890746	-0.00826449	0.993406	0.999806
YNL239W	17.8091	-0.0915747	0.822202	-0.111377	0.911317	0.999806
YNL240C	14.829	0.388181	0.886684	0.437789	0.661539	0.999806
YJR105W	2.13112	-0.424847	2.94135	-0.144439	0.885153	0.999806
YDR200C	15.6001	0.353035	0.86933	0.4061	0.684669	0.999806
YDR198C	12.5084	0.544501	0.958966	0.5678	0.570171	0.999806
YNL244C	5.12185	-0.740905	1.6087	-0.460562	0.645113	0.999806
YNL245C	3.38828	0.0970923	2.05506	0.0472455	0.962318	0.999806
YDR195W	6.97844	0.365227	1.29515	0.281995	0.777947	0.999806
YJR108W	17.5187	-0.134234	0.825957	-0.16252	0.870897	0.999806
YDR197W	5.81506	0.443115	1.45544	0.304455	0.760781	0.999806
YDR196C	4.63581	-1.29969	1.73932	-0.747238	0.45492	0.999806
YDR191W	14.6227	0.00231286	0.895656	0.00258231	0.99794	0.999806
YDR190C	5.51317	-0.325201	1.52049	-0.21388	0.830641	0.999806
YDR194C	5.13336	0.0560694	1.58056	0.0354743	0.971702	0.999806
YDR192C	10.0701	0.114053	1.06804	0.106787	0.914958	0.999806
YAL046C	3.86903	-0.181727	1.91497	-0.0948979	0.924396	0.999806
YAL044W-A	6.39675	0.400718	1.36545	0.29347	0.769163	0.999806
YAL048C	20.8123	-0.0889945	0.764781	-0.116366	0.907363	0.999806
YAL047C	9.85237	-1.00327	1.11041	-0.903512	0.366254	0.999806
YDR435C	21.0636	0.890966	0.771345	1.15508	0.248058	0.999806
YDR434W	8.0188	-1.0418	1.22733	-0.848836	0.395973	0.999806
YAL044C	13.6559	-0.0371203	0.935766	-0.0396683	0.968358	0.999806
YAL043C	26.5602	-1.06948	0.715249	-1.49526	0.134848	0.999806
YNL066W	26.8345	0.196489	0.681174	0.288456	0.772998	0.999806
YDR428C	13.6488	-0.0159822	0.926815	-0.0172443	0.986242	0.999806
YDR432W	6.69864	0.971839	1.33666	0.727065	0.467186	0.999806
YDR430C	35.5979	0.572523	0.625188	0.915761	0.359792	0.999806
YDR424C	3.10319	0.665031	2.15741	0.308255	0.757889	0.999806
YDR423C	20.3484	0.258548	0.772781	0.334568	0.737951	0.999806
YDR427W	3.47242	-1.96879	2.15977	-0.911574	0.361993	0.999806
YDR425W	16.1765	0.189101	0.853204	0.221637	0.824597	0.999806
YNL256W	4.8377	-0.660034	1.69092	-0.390341	0.696285	0.999806
YNL257C	46.5129	-0.565662	0.534835	-1.05764	0.29022	0.999806
YPL257W	7.06165	-0.172482	1.31288	-0.131377	0.895477	0.999806
YOR025W	13.0007	0.708793	0.948962	0.746913	0.455116	0.999806
YNL264C	15.7693	-0.416792	0.870064	-0.479036	0.631913	0.999806
YNL265C	12.0931	-0.0400755	1.0355	-0.0387015	0.969128	0.999806
YNL262W	32.9977	-0.290321	0.623635	-0.46553	0.641552	0.999806
YFL024C	28.4913	-1.2697	0.685136	-1.85321	0.0638525	0.999806
YNL260C	1.16339	-0.0110442	4.02552	-0.00274354	0.997811	0.999806
YLR429W	31.4977	0.360576	0.633726	0.568977	0.569372	0.999806
YNL281W	8.71296	-0.295255	1.17326	-0.251653	0.801309	0.999806
YNL259C	5.81506	0.443115	1.45544	0.304455	0.760781	0.999806
YER038W-A	1.2581	-0.143459	3.59569	-0.0398976	0.968175	0.999806
YER038C	4.83147	-0.977766	1.67361	-0.584227	0.559068	0.999806
YPL004C	30.0007	-0.271451	0.652557	-0.41598	0.677425	0.999806
YER039C	8.32503	0.143905	1.20418	0.119505	0.904875	0.999806
YER035W	14.5367	0.536625	0.922639	0.58162	0.560823	0.999806
YER034W	25.1462	-0.473371	0.706963	-0.669584	0.503123	0.999806
YER037W	17.0548	0.280471	0.83499	0.335897	0.736948	0.999806
YER036C	13.432	-0.965254	0.948579	-1.01758	0.308878	0.999806
YOR283W	9.09805	-0.219418	1.12317	-0.195356	0.845114	0.999806
YER041W	16.7414	-0.192541	0.844217	-0.228071	0.819591	0.999806
YER040W	8.98993	-0.314432	1.21596	-0.258587	0.795954	0.999806
YPL071C	8.04617	0.496105	1.19326	0.415755	0.677589	0.999806
YPL258C	16.7529	0.0324945	0.84106	0.0386352	0.969181	0.999806
YPR065W	12.2277	0.99173	0.984407	1.00744	0.313724	0.999806
YPL075W	6.3809	-0.881064	1.40252	-0.628202	0.529872	0.999806
YDR043C	8.91919	0.369384	1.14191	0.323478	0.746334	0.999806
YOR276W	9.909	1.04459	1.13417	0.921016	0.357042	0.999806
YNL024C	31.8007	-0.760123	0.640785	-1.18624	0.235528	0.999806
YOR286W	14.018	-0.56691	0.927372	-0.611307	0.540996	0.999806
YNL282W	7.93032	-0.824611	1.2488	-0.660322	0.509047	0.999806
YML075C	35.8705	0.465058	0.599618	0.775589	0.437991	0.999806
YML054C	42.7408	0.436523	0.553887	0.788109	0.430633	0.999806
YML055W	4.53487	-1.74191	1.81215	-0.961243	0.33643	0.999806
YPL047W	4.44015	-1.71472	1.82495	-0.939599	0.347423	0.999806
YLR363C	5.22279	-0.492347	1.57166	-0.313266	0.754079	0.999806
YOL053W	21.9882	0.01899	0.764894	0.024827	0.980193	0.999806
YPR032W	12.4118	0.775279	0.998329	0.776577	0.437408	0.999806
YML059C	42.8216	0.200855	0.552607	0.363467	0.716256	0.999806
YML060W	8.72353	0.287142	1.15509	0.24859	0.803678	0.999806
YML061C	7.44957	-0.711982	1.30607	-0.545132	0.585663	0.999806
YML077W	2.90224	-0.440805	2.25505	-0.195474	0.845022	0.999806
YML056C	21.9934	0.13235	0.761197	0.17387	0.861967	0.999806
YML057W	27.2498	0.455041	0.708078	0.642643	0.520456	0.999806
YML058W	7.37505	0.870191	1.25776	0.691858	0.489027	0.999806
YOR310C	5.98863	-1.02794	1.46698	-0.700715	0.483481	0.999806
YBR123C	8.70144	-0.791833	1.16711	-0.678456	0.497483	0.999806
YBR125C	15.1203	0.335293	0.884472	0.379088	0.704622	0.999806
YBR126C	9.56294	-1.35979	1.13999	-1.19281	0.232945	0.999806
YBR126W-A	17.6985	-0.554635	0.828641	-0.669331	0.503284	0.999806
YBR119W	5.22279	-0.492347	1.57166	-0.313266	0.754079	0.999806
YBR122C	2.70658	-0.855624	2.37121	-0.360839	0.71822	0.999806
YOR228C	19.5551	-0.159724	0.791821	-0.201717	0.840138	0.999806
YHR082C	32.4169	-0.341825	0.63369	-0.53942	0.589597	0.999806
YBR127C	5.32902	0.207839	1.54183	0.1348	0.89277	0.999806
YJL168C	21.4806	-0.0161516	0.813565	-0.0198529	0.984161	0.999806
YHR211W	22.1872	0.291133	0.742219	0.392247	0.694876	0.999806
YER124C	12.196	-0.193865	0.973889	-0.199062	0.842214	0.999806
YER123W	22.8204	-0.595019	0.740254	-0.803804	0.42151	0.999806
YPL054W	16.8927	0.903909	0.862519	1.04799	0.294645	0.999806
YLR362W	21.2772	-0.529099	0.762831	-0.6936	0.487933	0.999806
YOL051W	9.38937	-0.292392	1.11855	-0.261403	0.793782	0.999806
YNL073W	11.4239	-0.0517901	1.00089	-0.051744	0.958733	0.999806
YER115C	5.14393	0.974065	1.58486	0.614605	0.538816	0.999806
YER118C	7.8222	-0.982855	1.26885	-0.774604	0.438574	0.999806
YER120W	6.81015	1.76484	1.35667	1.30086	0.193305	0.999806
YER119C	35.735	0.149952	0.603494	0.248473	0.803768	0.999806
YER122C	2.03017	-1.07937	2.83619	-0.380569	0.703523	0.999806
YER121W	9.0803	-0.849131	1.16465	-0.729086	0.465949	0.999806
YDR099W	4.75261	0.732658	1.66162	0.440931	0.659263	0.999806
YAR007C	1.82828	-4.65279	3.60507	-1.29062	0.196834	0.999806
YMR174C	5.12279	-1.09437	1.63298	-0.670167	0.502751	0.999806
YJL170C	13.7737	0.461884	0.972151	0.475116	0.634704	0.999806
YPL053C	21.8863	0.038029	0.74804	0.0508383	0.959454	0.999806
YOL052C	31.0401	-0.567077	0.643977	-0.880585	0.378542	0.999806
YNL074C	18.6633	1.50761	0.81589	1.84781	0.0646301	0.999806
YMR205C	14.1863	-1.63673	0.964738	-1.69656	0.0897807	0.999806
YMR204C	5.31751	-0.518179	1.56207	-0.331726	0.740096	0.999806
YMR203W	2.32583	0.556193	2.57706	0.215825	0.829124	0.999806
YMR202W	5.23431	0.23706	1.58124	0.14992	0.880827	0.999806
YMR201C	17.5293	0.157577	0.8263	0.190702	0.848759	0.999806
YMR200W	3.6796	-0.10317	1.95233	-0.0528445	0.957856	0.999806
YMR199W	17.7259	0.123531	0.82082	0.150497	0.880372	0.999806
YMR198W	18.7759	-0.0576124	0.811272	-0.071015	0.943386	0.999806
YMR197C	1.16339	-0.0110442	4.02552	-0.00274354	0.997811	0.999806
YMR196W	52.4879	0.112647	0.502962	0.223967	0.822783	0.999806
YBR014C	6.29675	0.0405506	1.39407	0.0290879	0.976794	0.999806
YBR015C	15.6621	-0.579651	0.879846	-0.658809	0.510018	0.999806
YMR042W	63.0365	-0.644538	0.465739	-1.3839	0.166388	0.999806
YNL277W-A	16.1765	0.189101	0.853204	0.221637	0.824597	0.999806
YBR007C	36.2211	0.189398	0.603374	0.313899	0.753598	0.999806
YBR008C	44.9644	-0.600334	0.543522	-1.10452	0.269366	0.999806
YBR009C	2.62244	1.11727	2.40368	0.464816	0.642063	0.999806
YBR010W	5.34488	1.51825	1.57577	0.963495	0.335299	0.999806
YBR011C	3.29356	0.143735	2.07859	0.06915	0.94487	0.999806
YBR012W-B	9.57351	-0.624851	1.1031	-0.566449	0.571089	0.999806
YBR012W-A	5.32374	-0.273642	1.55405	-0.176083	0.860229	0.999806
YBR013C	6.27995	-1.12321	1.42177	-0.790005	0.429525	0.999806
YOL048C	5.91694	0.363884	1.52337	0.238867	0.811209	0.999806
YNL071W	6.27901	-0.826315	1.4302	-0.577764	0.563424	0.999806
YJR065C	12.8546	-0.622567	0.975638	-0.638113	0.5234	0.999806
YOR302W	1.55471	0.980513	3.43707	0.285276	0.775433	0.999806
YPL119C	18.1455	0.710801	0.834392	0.851879	0.394281	0.999806
YPL256C	15.2318	0.697532	0.88495	0.788216	0.43057	0.999806
YMR030W-A	6.19581	-0.119724	1.39812	-0.0856323	0.931759	0.999806
YOL091W	6.57561	-0.442197	1.35893	-0.325401	0.744878	0.999806
YOL092W	12.7671	-0.630988	0.968793	-0.651313	0.514844	0.999806
YOL089C	19.7701	0.524995	0.807672	0.65001	0.515686	0.999806
YOL090W	18.5908	0.169951	0.823041	0.206491	0.836407	0.999806
YNL278W	56.2926	-0.451241	0.488268	-0.924167	0.355399	0.999806
YOL096C	13.5257	-0.839829	0.958504	-0.876187	0.380928	0.999806
YOL093W	3.96374	-0.221142	1.95109	-0.113343	0.909759	0.999806
YOL094C	3.57865	-0.406102	1.988	-0.204277	0.838137	0.999806
YAL009W	4.73053	-1.32654	1.72734	-0.767964	0.442508	0.999806
YLR289W	12.2507	1.51556	0.993346	1.52571	0.127082	0.999806
YOL087C	25.1346	0.798806	0.713807	1.11908	0.263106	0.999806
YOL088C	5.04393	0.55787	1.61062	0.346371	0.729064	0.999806
YNL126W	9.8586	-0.840276	1.09352	-0.768413	0.442242	0.999806
YNL072W	24.7602	-0.441971	0.712151	-0.620614	0.534854	0.999806
YDR059C	7.08996	1.13193	1.29578	0.873551	0.382363	0.999806
YCR033W	53.561	0.18455	0.499835	0.369222	0.711963	0.999806
YPL255W	10.4499	-0.082062	1.06918	-0.0767522	0.938821	0.999806
YCR073W-A	11.9878	-0.486835	1.00534	-0.484249	0.628209	0.999806
YPL097W	5.53525	1.18091	1.5174	0.778243	0.436426	0.999806
YDR105C	16.311	0.93614	0.87154	1.07412	0.282768	0.999806
YMR033W	2.2196	-1.20561	2.73619	-0.440615	0.659492	0.999806
YLR417W	10.072	-0.168833	1.10197	-0.15321	0.878232	0.999806
YPL194W	9.69031	0.314163	1.08223	0.290293	0.771592	0.999806
YNL083W	15.5948	0.197265	0.867973	0.227271	0.820213	0.999806
YJL166W	1.75565	2.70372	3.30806	0.817313	0.41375	0.999806
YNL127W	27.6321	0.613014	0.679802	0.901754	0.367188	0.999806
YNL069C	4.83676	-0.335375	1.64798	-0.203506	0.838739	0.999806
YPL064C	14.0339	0.0242508	0.935324	0.0259277	0.979315	0.999806
YBL099W	8.51012	-0.380515	1.17647	-0.323438	0.746364	0.999806
YBL098W	20.5431	0.361439	0.768951	0.470042	0.638325	0.999806
YOR195W	12.705	0.491597	0.974245	0.504592	0.613845	0.999806
YPL098C	0.967729	-1.00651	4.5111	-0.223118	0.823444	0.999806
YBL101C	58.713	0.228712	0.476886	0.479595	0.631515	0.999806
YBL100W-C	6.76599	-0.727507	1.34035	-0.542773	0.587286	0.999806
YBL100W-B	11.8975	-0.114312	1.0438	-0.109515	0.912794	0.999806
YBL100W-A	3.10847	1.40917	2.20242	0.639827	0.522285	0.999806
YBL105C	19.2417	-0.631526	0.799508	-0.789893	0.429591	0.999806
YBL104C	48.7713	-0.243553	0.520014	-0.468359	0.639528	0.999806
YBL103C	14.1684	0.906722	0.909439	0.997012	0.318759	0.999806
YBL102W	7.95146	0.515395	1.20514	0.427663	0.668896	0.999806
YNR008W	52.1534	-0.24426	0.506308	-0.482434	0.629497	0.999806
YNR007C	10.859	0.496248	1.02523	0.484035	0.628361	0.999806
YDL186W	8.44278	0.929476	1.16983	0.794536	0.426883	0.999806
YNL003C	9.58314	0.107228	1.11647	0.0960419	0.923487	0.999806
YNL128W	22.6617	0.195694	0.74525	0.262589	0.792867	0.999806
YNL077W	13.0892	0.623054	0.944392	0.659741	0.50942	0.999806
YNR003C	3.19262	-0.166605	2.13344	-0.0780919	0.937755	0.999806
YNR002C	74.6694	-0.515802	0.429887	-1.19986	0.230195	0.999806
YNR006W	8.01258	-1.26541	1.25746	-1.00632	0.314261	0.999806
YNR004W	11.8027	-0.101237	1.0249	-0.0987767	0.921316	0.999806
YLR227C	16.2029	0.916706	0.870221	1.05342	0.29215	0.999806
YPL099C	6.36844	-1.44532	1.4638	-0.987376	0.323458	0.999806
YOR017W	12.3118	0.600516	0.975792	0.615414	0.538281	0.999806
YMR028W	4.74204	-0.306028	1.66886	-0.183375	0.854504	0.999806
YOR162C	43.2023	0.122849	0.552226	0.222461	0.823955	0.999806
YLR063W	6.20638	0.665849	1.39614	0.47692	0.633419	0.999806
YNL258C	5.7824	-3.83442	1.98063	-1.93596	0.0528727	0.999806
YMR171C	18.898	0.514688	0.818535	0.628792	0.529485	0.999806
YPR058W	8.03994	0.369963	1.21645	0.304133	0.761026	0.999806
YDL185W	14.6059	-0.450706	0.89964	-0.500984	0.616382	0.999806
YDL059C	3.7796	0.513431	1.92355	0.266918	0.789532	0.999806
YDL210W	17.7153	-0.165611	0.826082	-0.200478	0.841107	0.999806
YDR052C	2.13017	0.232948	2.70728	0.086045	0.931431	0.999806
YNL067W-B	4.44544	-0.821162	1.75657	-0.46748	0.640156	0.999806
YOR101W	11.5733	1.74789	1.02331	1.70807	0.0876228	0.999806
YPL122C	4.07092	0.310966	1.83181	0.169759	0.8652	0.999806
YLR226W	3.58394	0.320141	1.98567	0.161226	0.871916	0.999806
YPL211W	4.05412	-1.55849	1.91458	-0.814014	0.415637	0.999806
YOR227W	40.4799	-0.00507612	0.572729	-0.00886305	0.992928	0.999806
YOR018W	29.8802	-0.386842	0.679207	-0.56955	0.568983	0.999806
YKL052C	16.8706	0.438881	0.848764	0.517083	0.605098	0.999806
YKL051W	34.9009	0.577655	0.611975	0.94392	0.345211	0.999806
YKL054C	2.03546	0.312051	2.76061	0.113037	0.910001	0.999806
YPL059W	1.8398	-0.102231	2.92595	-0.0349396	0.972128	0.999806
YKL055C	3.47337	-3.07881	2.40029	-1.28268	0.199603	0.999806
YKL057C	6.19052	-0.570364	1.41297	-0.403662	0.686461	0.999806
YMR172W	32.6896	-0.48234	0.627965	-0.7681	0.442428	0.999806
YKL059C	14.2156	-0.719816	0.926032	-0.777312	0.436975	0.999806
YJL167W	0.973014	1.48712	4.4059	0.337529	0.735718	0.999806
YPL046C	2.61715	0.239272	2.40408	0.0995275	0.920719	0.999806
YJR149W	18.4086	0.169847	0.813414	0.208808	0.834598	0.999806
YIL137C	35.8264	-0.00276757	0.59823	-0.00462626	0.996309	0.999806
YAL051W	52.7475	-0.195168	0.501395	-0.389249	0.697092	0.999806
YIL102C	1.73885	-0.769778	3.06714	-0.250976	0.801833	0.999806
YIL027C	1.64942	0.857475	3.10977	0.275736	0.782751	0.999806
YLR384C	18.0961	-0.362801	0.825044	-0.439735	0.660129	0.999806
YLR225C	14.5324	0.278398	0.895361	0.310934	0.755851	0.999806
YPL101W	5.99486	-0.76278	1.45022	-0.525974	0.598906	0.999806
YJL171C	14.7501	0.870192	0.892156	0.97538	0.329372	0.999806
YJL172W	26.2308	-0.131594	0.68942	-0.190876	0.848623	0.999806
YPR154W	5.99392	-0.487357	1.45159	-0.33574	0.737067	0.999806
YPR029C	24.5813	-0.205054	0.710562	-0.28858	0.772903	0.999806
YOR210W	0.386035	-2.53664	6.1141	-0.414884	0.678227	0.999806
YLR397C	2.71715	1.04417	2.36732	0.441074	0.659159	0.999806
YLR398C	21.8295	0.746233	0.75138	0.99315	0.320637	0.999806
YLR399C	4.9377	-0.11362	1.62264	-0.0700217	0.944176	0.999806
YLR401C	31.5828	0.159083	0.638802	0.249034	0.803335	0.999806
YNL123W	35.3129	-0.386303	0.605842	-0.637629	0.523715	0.999806
YJL174W	0.386035	-2.53664	6.1141	-0.414884	0.678227	0.999806
YLR395C	3.0979	-0.119091	2.15976	-0.055141	0.956026	0.999806
YLR396C	18.5663	-0.73621	0.823668	-0.893818	0.371419	0.999806
YIL101C	50.3429	-0.0721539	0.512026	-0.140918	0.887934	0.999806
YJL176C	5.50694	-0.57019	1.59208	-0.358141	0.720238	0.999806
YLR403W	8.6173	-0.110313	1.15768	-0.0952876	0.924086	0.999806
YLR404W	9.97012	-0.12826	1.06983	-0.119888	0.904571	0.999806
YPR057W	7.06693	0.19301	1.32555	0.145608	0.884231	0.999806
YPL103C	24.0891	-0.32944	0.719466	-0.457896	0.647027	0.999806
YJL105W	8.41107	-0.928844	1.20361	-0.771712	0.440285	0.999806
YHR158C	26.4158	-0.300901	0.688935	-0.436762	0.662284	0.999806
YHR157W	4.84204	0.204231	1.64598	0.124079	0.901253	0.999806
YDR023W	0.581694	-0.0943944	5.75197	-0.0164108	0.986907	0.999806
YOR293W	0.386035	-2.53664	6.1141	-0.414884	0.678227	0.999806
YJL104W	1.74508	-0.0116353	3.2518	-0.0035781	0.997145	0.999806
YHR152W	9.0139	0.3525	1.12509	0.313309	0.754046	0.999806
YHR151C	26.4717	-1.00035	0.703121	-1.42272	0.154817	0.999806
YHR150W	22.0978	0.406301	0.743085	0.546775	0.584533	0.999806
YHR149C	19.8393	-0.181081	0.782541	-0.231402	0.817003	0.999806
YHR156C	10.6677	0.778722	1.05443	0.73852	0.460198	0.999806
YHR155W	20.2368	-0.0337107	0.775359	-0.0434775	0.965321	0.999806
YHR154W	27.7907	0.029495	0.670611	0.0439822	0.964919	0.999806
YHR153C	8.79616	-0.806265	1.15764	-0.696472	0.486133	0.999806
YLL024C	23.2559	0.281838	0.727247	0.387541	0.698356	0.999806
YLL023C	18.8042	0.451487	0.798553	0.565382	0.571814	0.999806
YLL022C	14.0737	0.918647	0.912589	1.00664	0.314108	0.999806
YJL106W	27.6739	-0.293563	0.674445	-0.435266	0.663369	0.999806
YLL019C	8.2692	1.82047	1.21289	1.50094	0.133372	0.999806
YJL094C	29.3647	0.506841	0.677103	0.748544	0.454132	0.999806
YLL018C	6.08958	-0.784211	1.43235	-0.547501	0.584034	0.999806
YLL015W	44.9201	-0.135373	0.545552	-0.248139	0.804027	0.999806
YLL014W	2.71187	0.179047	2.33474	0.0766883	0.938871	0.999806
YJL109C	22.7468	-0.0965351	0.735776	-0.131202	0.895616	0.999806
YLR386W	10.0648	-0.142005	1.06741	-0.133037	0.894164	0.999806
YIL161W	4.65167	0.558431	1.70642	0.327253	0.743477	0.999806
YPL104W	6.86165	-1.00882	1.34183	-0.751826	0.452156	0.999806
YJL108C	7.76108	0.72739	1.22062	0.59592	0.551228	0.999806
YLR178C	13.1112	1.22201	0.949555	1.28693	0.198119	0.999806
YLR179C	31.2136	0.375712	0.645749	0.581824	0.560686	0.999806
YLR176C	14.5722	1.11182	0.935937	1.18792	0.234864	0.999806
YLR177W	18.7369	1.00294	0.805302	1.24542	0.212976	0.999806
YLR182W	1.16867	1.9006	4.02702	0.471961	0.636955	0.999806
YJL111W	3.87431	0.468319	1.95053	0.240098	0.810254	0.999806
YLR180W	21.2319	0.439852	0.762685	0.576715	0.564132	0.999806
YKR049C	13.5352	2.29733	0.982196	2.33897	0.0193369	0.999806
YLR240W	13.8525	-0.0763111	0.966864	-0.0789264	0.937091	0.999806
YLR241W	20.644	0.403709	0.765923	0.527088	0.598132	0.999806
YLR185W	1.55471	0.980513	3.43707	0.285276	0.775433	0.999806
YIL031W	31.6084	-0.593486	0.660468	-0.898584	0.368875	0.999806
YDL181W	6.29581	0.261064	1.38678	0.188251	0.85068	0.999806
YNR075C-A	6.78278	0.258423	1.3176	0.196132	0.844507	0.999806
YMR126C	9.29994	0.00351911	1.13088	0.00311182	0.997517	0.999806
YLR006C	22.2406	-0.762265	0.764948	-0.996493	0.319011	0.999806
YJL095W	25.7688	-1.85514	0.74132	-2.50249	0.0123324	0.999806
YNR073C	10.2614	-0.196714	1.06219	-0.185197	0.853074	0.999806
YMR127C	13.6425	-0.101545	0.948196	-0.107093	0.914715	0.999806
YLL001W	79.1802	-0.147175	0.415214	-0.354457	0.722997	0.999806
YLR001C	93.8544	-0.339697	0.384941	-0.882466	0.377525	0.999806
YLL003W	10.9326	-0.453537	1.03323	-0.438951	0.660697	0.999806
YLL002W	12.2118	0.421062	0.968936	0.434561	0.663881	0.999806
YLR004C	27.0259	0.0828713	0.688241	0.12041	0.904158	0.999806
YLR005W	6.9775	0.560326	1.32398	0.423212	0.67214	0.999806
YLR002C	2.42678	0.89557	2.5062	0.357342	0.720836	0.999806
YLR003C	4.44544	-0.821162	1.75657	-0.46748	0.640156	0.999806
YBR262C	5.71411	0.289996	1.48904	0.194753	0.845586	0.999806
YBR261C	14.0454	0.280434	0.917393	0.305686	0.759843	0.999806
YBR260C	27.7802	-0.157108	0.672528	-0.233608	0.81529	0.999806
YBR259W	23.5002	-0.327598	0.754973	-0.43392	0.664346	0.999806
YIL111W	9.87974	0.283714	1.08302	0.261964	0.793349	0.999806
YIL112W	29.5675	0.5189	0.652827	0.79485	0.426701	0.999806
YOL036W	21.717	0.558596	0.75074	0.744061	0.45684	0.999806
YBR263W	23.34	0.0640878	0.726328	0.0882354	0.92969	0.999806
YIL115C	36.5188	-0.913036	0.617826	-1.47782	0.139455	0.999806
YIL116W	26.1466	0.0705962	0.689174	0.102436	0.918411	0.999806
YIL113W	20.1032	-0.876984	0.789961	-1.11016	0.26693	0.999806
YIL114C	6.01072	0.558766	1.4246	0.392227	0.69489	0.999806
YIL119C	22.3859	-2.09479	0.805178	-2.60165	0.00927751	0.999806
YIL120W	42.7261	-0.672963	0.563392	-1.19449	0.232288	0.999806
YIL117C	10.8528	0.403986	1.02955	0.392393	0.694768	0.999806
YIL118W	11.4965	-0.955348	1.02475	-0.932276	0.351194	0.999806
YMR299C	8.42164	-0.217083	1.17349	-0.184989	0.853237	0.999806
YOR394C-A	7.45391	-0.123608	1.24864	-0.0989944	0.921143	0.999806
YCR108C	19.0461	-0.692924	0.804455	-0.861358	0.389041	0.999806
YCR107W	9.58314	0.107228	1.11647	0.0960419	0.923487	0.999806
YHL034C	8.36392	1.7955	1.21146	1.4821	0.138315	0.999806
YHL035C	45.2306	0.137698	0.536913	0.256462	0.797594	0.999806
YOR389W	19.9623	0.304359	0.778239	0.391087	0.695733	0.999806
YLR221C	5.03865	0.0857048	1.62097	0.0528725	0.957834	0.999806
YHL039W	21.2983	-0.0133122	0.758022	-0.0175617	0.985988	0.999806
YHL040C	35.6688	-0.64536	0.615952	-1.04774	0.294756	0.999806
YHL036W	31.643	-0.198022	0.636462	-0.31113	0.755702	0.999806
YHL038C	7.25825	-0.249078	1.27016	-0.1961	0.844532	0.999806
YHL044W	9.96389	-0.249025	1.08246	-0.230054	0.81805	0.999806
YHL046C	4.73581	-0.587264	1.6956	-0.346346	0.729083	0.999806
YHL042W	21.5834	-0.100495	0.755734	-0.132976	0.894212	0.999806
YHL043W	4.06469	0.041476	1.85483	0.0223611	0.98216	0.999806
YJR057W	3.28205	-1.18421	2.16287	-0.547515	0.584025	0.999806
YJR058C	15.5001	0.206732	0.869346	0.237801	0.812035	0.999806
YJR055W	2.13017	0.232948	2.70728	0.086045	0.931431	0.999806
YJR056C	4.83676	-0.335375	1.64798	-0.203506	0.838739	0.999806
YJR053W	19.4302	-0.560709	0.812428	-0.690165	0.490091	0.999806
YJR054W	14.0242	-0.469965	0.916804	-0.512613	0.608222	0.999806
YJR051W	25.873	0.277237	0.694778	0.399029	0.689872	0.999806
YJR052W	16.1765	0.189101	0.853204	0.221637	0.824597	0.999806
YDL179W	6.97844	0.365227	1.29515	0.281995	0.777947	0.999806
YDL212W	3.29885	0.857946	2.0836	0.411761	0.680515	0.999806
YMR312W	0.386035	-2.53664	6.1141	-0.414884	0.678227	0.999806
YOL024W	7.16259	-0.026466	1.28283	-0.0206309	0.98354	0.999806
YJR059W	27.7878	1.37381	0.682323	2.01343	0.0440693	0.999806
YJL097W	9.26445	-1.27844	1.20146	-1.06407	0.287295	0.999806
YAL053W	41.8256	-0.00632646	0.557378	-0.0113504	0.990944	0.999806
YOR033C	18.1163	0.286961	0.814173	0.352457	0.724496	0.999806
YMR121C	14.2261	-0.306662	0.912188	-0.336182	0.736733	0.999806
YPL124W	4.44544	-0.821162	1.75657	-0.46748	0.640156	0.999806
YLR220W	11.1546	0.751947	1.01513	0.740737	0.458853	0.999806
YOR153W	59.0974	1.52751	0.486053	3.14268	0.00167407	0.679912
YOR152C	1.73357	-4.58729	3.63998	-1.26025	0.207578	0.999806
YOR151C	12.2065	0.22384	0.968559	0.231107	0.817232	0.999806
YNL200C	4.07092	0.310966	1.83181	0.169759	0.8652	0.999806
YOR148C	0.777354	0.903804	4.92745	0.183422	0.854467	0.999806
YOR147W	4.16563	0.272609	1.80079	0.151383	0.879673	0.999806
YOR145C	1.8398	-0.102231	2.92595	-0.0349396	0.972128	0.999806
YOR144C	20.1474	0.0988013	0.778017	0.126991	0.898947	0.999806
YML053C	11.9426	1.15145	0.993334	1.15918	0.246384	0.999806
YMR124W	26.4476	0.28241	0.688498	0.410184	0.681671	0.999806
YCL048W	24.5857	-0.038675	0.71658	-0.0539717	0.956958	0.999806
YOL095C	10.8475	0.180184	1.02659	0.175517	0.860674	0.999806
YMR125W	11.8931	-0.475452	0.998103	-0.476356	0.633821	0.999806
YMR301C	18.1961	-0.219218	0.814765	-0.269057	0.787886	0.999806
YJL098W	40.3824	0.102356	0.566965	0.180534	0.856734	0.999806
YGR116W	26.9755	-0.668717	0.687539	-0.972625	0.33074	0.999806
YGR113W	6.68713	0.484047	1.33581	0.362362	0.717082	0.999806
YLR390W	8.16392	1.26839	1.22745	1.03335	0.30144	0.999806
YGR117C	9.67974	-0.207374	1.09034	-0.190191	0.849159	0.999806
YGR120C	1.45376	0.441979	3.32188	0.133051	0.894153	0.999806
YGR119C	11.7027	-0.320275	1.00786	-0.317776	0.750655	0.999806
YGR121W-A	34.7365	-0.312214	0.608776	-0.512856	0.608052	0.999806
YGR121C	47.9248	0.0410663	0.528638	0.0776833	0.93808	0.999806
YGR123C	29.5224	-0.00315092	0.667454	-0.0047208	0.996233	0.999806
YGR122W	21.4204	0.488366	0.758767	0.643632	0.519814	0.999806
YPL196W	9.03165	0.847887	1.96779	0.430882	0.666554	0.999806
YPL198W	6.18958	-0.317008	1.41708	-0.223705	0.822987	0.999806
YPL190C	6.67656	-0.269567	1.33535	-0.20187	0.840019	0.999806
YPL191C	12.9892	0.455162	0.941314	0.483539	0.628713	0.999806
YPL193W	3.49451	1.02813	2.01771	0.509555	0.610363	0.999806
YGR146C-A	15.5895	0.0370711	0.867999	0.0427087	0.965934	0.999806
YGR146C	9.9418	-1.40899	1.13133	-1.24543	0.212974	0.999806
YGR148C	7.46448	0.536618	1.24671	0.430427	0.666885	0.999806
YGR147C	12.1214	0.738668	0.990884	0.745464	0.455991	0.999806
YGR150C	4.55695	0.594951	1.7043	0.349088	0.727023	0.999806
YGR149W	12.8829	0.200926	0.945518	0.212504	0.831714	0.999806
YGR153W	10.2941	1.06235	1.06597	0.996611	0.318954	0.999806
YGR152C	11.6931	-0.996057	1.01376	-0.982537	0.325835	0.999806
YGR155W	3.98149	0.925174	1.8936	0.488581	0.625139	0.999806
YGR154C	13.6497	-0.121912	0.923513	-0.132009	0.894977	0.999806
YIL057C	15.1929	-0.249084	0.880688	-0.282829	0.777308	0.999806
YIL060W	5.51317	-0.325201	1.52049	-0.21388	0.830641	0.999806
YLR034C	16.1616	-0.38496	0.87411	-0.440402	0.659646	0.999806
YLR035C	22.2546	-0.224885	0.74672	-0.301163	0.76329	0.999806
YJL092W	20.845	0.550449	0.763463	0.72099	0.470916	0.999806
YJL093C	22.5344	-0.436302	0.745282	-0.585419	0.558266	0.999806
YEL063C	18.5927	0.0190831	0.803917	0.0237377	0.981062	0.999806
YEL062W	23.0549	0.143213	0.731378	0.195812	0.844757	0.999806
YEL061C	24.7655	-0.327368	0.711597	-0.460046	0.645483	0.999806
YEL060C	33.3058	-0.112509	0.626269	-0.17965	0.857427	0.999806
YEL067C	41.2006	-0.499641	0.564756	-0.884703	0.376317	0.999806
YEL066W	27.9581	-0.308597	0.675123	-0.457097	0.647601	0.999806
YEL065W	35.596	0.646328	0.6018	1.07399	0.282826	0.999806
YEL064C	15.4107	0.372597	0.87246	0.427065	0.669332	0.999806
YPR069C	6.01072	0.558766	1.4246	0.392227	0.69489	0.999806
YPR088C	4.83581	-0.032451	1.74693	-0.0185761	0.985179	0.999806
YDR502C	19.307	0.805905	0.791479	1.01823	0.30857	0.999806
YEL059C-A	1.75037	1.29849	3.2278	0.402282	0.687476	0.999806
YEL058W	4.0594	-0.64551	1.85693	-0.347622	0.728124	0.999806
YPR020W	3.30508	1.14579	2.26492	0.505884	0.612938	0.999806
YJL072C	4.43921	-1.20352	1.83604	-0.655502	0.512145	0.999806
YJL073W	21.5781	-0.224049	0.755536	-0.296544	0.766815	0.999806
YML067C	9.41485	1.14184	1.14582	0.996529	0.318993	0.999806
YOR238W	11.4903	-1.10314	1.0511	-1.04951	0.293945	0.999806
YOR246C	14.0737	0.918647	0.912589	1.00664	0.314108	0.999806
YOR245C	8.22692	-0.518933	1.23944	-0.418684	0.675447	0.999806
YOR244W	3.1979	0.608966	2.16369	0.281448	0.778367	0.999806
YJL200C	32.5009	0.595318	0.677876	0.878211	0.379829	0.999806
YJL079C	20.83	0.140948	0.773974	0.182109	0.855497	0.999806
YJL100W	25.7817	0.480606	0.698407	0.688147	0.49136	0.999806
YJL077W-B	3.57865	-0.406102	1.988	-0.204277	0.838137	0.999806
YJL078C	91.8631	-0.150794	0.389037	-0.387609	0.698305	0.999806
YJL077W-A	3.6796	-0.10317	1.95233	-0.0528445	0.957856	0.999806
YJL077C	49.2257	-0.552662	0.520895	-1.06099	0.288697	0.999806
YJL074C	15.1814	-0.520923	0.888516	-0.586284	0.557685	0.999806
YJL076W	29.8873	-0.394213	0.656255	-0.600701	0.548039	0.999806
YLR102C	6.99524	1.15771	1.32592	0.873138	0.382588	0.999806
YDL199C	7.97788	2.00251	1.26764	1.57972	0.114172	0.999806
YPR063C	5.42902	0.620542	1.5311	0.405292	0.685263	0.999806
YPR021C	16.6971	0.869253	0.866466	1.00322	0.315756	0.999806
YJL194W	4.25506	-0.382034	1.79453	-0.212888	0.831414	0.999806
YDR436W	32.7611	0.414873	0.62211	0.66688	0.504849	0.999806
YDR437W	7.44768	-0.286285	1.26471	-0.226364	0.820918	0.999806
YDR438W	12.968	-0.322945	0.952754	-0.33896	0.73464	0.999806
YDR439W	0.581694	-0.0943944	5.75197	-0.0164108	0.986907	0.999806
YDR440W	21.0478	0.565467	0.778527	0.72633	0.467637	0.999806
YDR441C	13.0218	1.41445	0.955732	1.47997	0.138882	0.999806
YDR443C	32.0477	-0.111347	0.638063	-0.174507	0.861467	0.999806
YDR444W	22.7866	0.477467	0.743872	0.641867	0.520959	0.999806
YDR446W	7.08467	0.8109	1.29373	0.626791	0.530796	0.999806
YGL092W	9.0971	-0.0580179	1.13105	-0.0512955	0.95909	0.999806
YGL091C	2.70658	-0.855624	2.37121	-0.360839	0.71822	0.999806
YGL090W	7.64957	-0.00818939	1.22889	-0.00666403	0.994683	0.999806
YGL097W	7.82749	-0.564643	1.26692	-0.445681	0.655828	0.999806
YGL096W	18.3855	-0.234342	0.80975	-0.289401	0.772275	0.999806
YGL095C	7.44957	-0.711982	1.30607	-0.545132	0.585663	0.999806
YGL094C	40.9607	-0.0297015	0.567933	-0.0522975	0.958292	0.999806
YER014W	7.25202	-0.424066	1.28741	-0.329395	0.741857	0.999806
YER014C-A	2.40998	-2.49131	2.77847	-0.896647	0.369908	0.999806
YDR170C	23.4074	-0.452994	0.729493	-0.620971	0.534619	0.999806
YDR170W-A	13.0786	0.259845	0.938888	0.276759	0.781965	0.999806
YLR439W	7.56014	0.335154	1.239	0.270503	0.786773	0.999806
YLR440C	4.63581	-1.29969	1.73932	-0.747238	0.45492	0.999806
YLR438W	41.1765	0.265851	0.560372	0.474418	0.635202	0.999806
YDR165W	6.68278	-0.0903732	1.35171	-0.0668586	0.946694	0.999806
YDR166C	16.0606	-0.457528	0.870004	-0.525892	0.598963	0.999806
YDR163W	9.6956	0.558516	1.08286	0.515778	0.606009	0.999806
YDR164C	13.8507	0.125214	0.914653	0.136898	0.891111	0.999806
YDR169C	6.68807	0.280783	1.34128	0.20934	0.834183	0.999806
YER011W	6.67127	-0.708314	1.34935	-0.524929	0.599633	0.999806
YDR167W	2.90753	0.442362	2.24044	0.197444	0.84348	0.999806
YDR168W	14.6122	-0.362003	0.904509	-0.40022	0.688994	0.999806
YPL019C	35.4667	0.3682	0.601494	0.612143	0.540443	0.999806
YMR297W	32.2203	-0.325772	0.630265	-0.516881	0.605239	0.999806
YPL216W	22.8593	0.10847	0.734307	0.147717	0.882566	0.999806
YPR079W	19.7835	0.557623	0.786292	0.70918	0.478213	0.999806
YNL267W	10.249	-0.442116	1.07692	-0.410537	0.681412	0.999806
YNL194C	7.55391	0.196348	1.24237	0.158044	0.874422	0.999806
YLR069C	15.2876	-0.258055	0.879552	-0.293394	0.769221	0.999806
YPL005W	1.75565	2.70372	3.30806	0.817313	0.41375	0.999806
YMR321C	2.13017	0.232948	2.70728	0.086045	0.931431	0.999806
YLR353W	21.4949	-0.0399396	0.754557	-0.0529311	0.957787	0.999806
YMR318C	30.2387	0.425107	0.646122	0.657935	0.51058	0.999806
YMR319C	27.1657	0.63115	0.713707	0.884326	0.37652	0.999806
YMR316C-A	5.03865	0.0857048	1.62097	0.0528725	0.957834	0.999806
YMR317W	19.6383	-0.369131	0.787869	-0.468518	0.639414	0.999806
YMR315W-A	3.10319	0.665031	2.15741	0.308255	0.757889	0.999806
YLL008W	6.68807	0.280783	1.34128	0.20934	0.834183	0.999806
YMR315W	7.06165	-0.172482	1.31288	-0.131377	0.895477	0.999806
YDR299W	7.64334	-0.160487	1.24403	-0.129005	0.897353	0.999806
YDR300C	5.6194	0.31741	1.48832	0.213268	0.831118	0.999806
YDR301W	16.6246	-0.793883	0.857418	-0.9259	0.354498	0.999806
YDR294C	24.9212	0.604997	0.704583	0.85866	0.390528	0.999806
YDR295C	10.6667	0.883759	1.7474	0.505757	0.613027	0.999806
YDR296W	5.13865	0.525773	1.5766	0.333485	0.738768	0.999806
YDR297W	29.503	0.736303	0.696807	1.05668	0.290657	0.999806
YMR013C	6.57033	-0.92028	1.37317	-0.670184	0.50274	0.999806
YLR423C	2.32583	0.556193	2.57706	0.215825	0.829124	0.999806
YMR011W	22.7761	0.269617	0.749289	0.35983	0.718974	0.999806
YMR012W	32.0698	0.160632	0.640789	0.250679	0.802062	0.999806
YDR302W	3.38394	-1.2735	2.17076	-0.586662	0.55743	0.999806
YDR303C	9.38937	-0.292392	1.11855	-0.261403	0.793782	0.999806
YMR006C	40.0478	-0.370735	0.572334	-0.647761	0.51714	0.999806
YLR422W	41.1158	1.56673	0.583642	2.6844	0.007266	0.999806
YPR147C	18.0437	0.740974	0.814722	0.90948	0.363097	0.999806
YCL058C	7.63805	-0.52951	1.2462	-0.424899	0.67091	0.999806
YLR354C	9.20956	0.430407	1.11281	0.386776	0.698922	0.999806
YOL044W	7.53183	-1.15919	1.28841	-0.899705	0.368277	0.999806
YLR424W	7.739	-0.374633	1.22696	-0.305335	0.760111	0.999806
YCL001W-B	17.9774	-0.750317	0.829819	-0.904194	0.365893	0.999806
YER113C	29.9839	-0.503286	0.653416	-0.770239	0.441158	0.999806
YER114C	46.7738	0.0908559	0.529147	0.171703	0.863671	0.999806
YER110C	17.5135	-0.288195	0.827477	-0.348282	0.727629	0.999806
YER111C	23.5127	-0.220448	0.728549	-0.302585	0.762206	0.999806
YER104W	4.35601	-0.126063	1.75356	-0.0718899	0.94269	0.999806
YER105C	40.641	-0.265905	0.565996	-0.469801	0.638497	0.999806
YER106W	4.35601	-0.126063	1.75356	-0.0718899	0.94269	0.999806
YER107C	2.03017	-1.07937	2.83619	-0.380569	0.703523	0.999806
YPL034W	4.35072	-0.790974	1.77948	-0.444498	0.656683	0.999806
YNL218W	25.3932	0.266454	0.717537	0.371346	0.71038	0.999806
YLR355C	8.03994	0.369963	1.21645	0.304133	0.761026	0.999806
YOL043C	12.0888	-0.387891	0.988767	-0.392298	0.694838	0.999806
YPR025C	3.49545	0.659111	2.20302	0.299185	0.764799	0.999806
YNL217W	21.618	0.395306	0.758764	0.520987	0.602376	0.999806
YCL004W	9.27596	-0.711393	1.14731	-0.620053	0.535223	0.999806
YNL216W	19.8215	-0.449548	0.803531	-0.559466	0.575844	0.999806
YOL042W	14.0684	0.7562	0.91227	0.828921	0.407149	0.999806
YCL002C	22.244	-0.477562	0.747769	-0.638649	0.523051	0.999806
YMR228W	11.0326	-0.212253	1.01964	-0.208164	0.835101	0.999806
YMR229C	18.4908	0.042582	0.812787	0.0523901	0.958218	0.999806
YMR226C	14.0454	0.280434	0.917393	0.305686	0.759843	0.999806
YMR227C	10.049	-1.05037	1.0922	-0.9617	0.3362	0.999806
YMR231W	21.5729	-0.35187	0.75615	-0.465344	0.641685	0.999806
YMR232W	20.93	0.25068	0.764618	0.327849	0.743026	0.999806
YMR230W-A	8.71201	-0.126284	1.14607	-0.110189	0.91226	0.999806
YNL272C	6.96259	-0.797983	1.33129	-0.599405	0.548903	0.999806
YNL222W	3.38299	-0.728248	2.07033	-0.351755	0.725022	0.999806
YMR233W	9.00239	-0.0423938	1.12775	-0.0375914	0.970013	0.999806
YMR234W	8.33749	0.396662	1.17813	0.336687	0.736353	0.999806
YDL175C	12.1243	0.408136	1.0425	0.391498	0.695429	0.999806
YPR149W	16.7067	1.22382	0.849978	1.43983	0.149916	0.999806
YNL221C	14.2367	0.0624237	0.904594	0.0690074	0.944984	0.999806
YHR022C-A	4.24978	-1.14327	1.82575	-0.626193	0.531188	0.999806
YOL038C-A	5.02619	-0.393506	1.66436	-0.236431	0.813098	0.999806
YPR026W	42.0433	0.218176	0.555097	0.393042	0.694289	0.999806
YBR067C	2.2364	1.66609	2.66701	0.624705	0.532165	0.999806
YBR066C	12.906	0.721571	0.96369	0.748759	0.454003	0.999806
YHR022C	13.7382	-0.219408	0.929772	-0.23598	0.813448	0.999806
YBR062C	7.75146	-0.0610653	1.29001	-0.0473369	0.962245	0.999806
YBR061C	12.481	-0.348614	0.964555	-0.361425	0.717782	0.999806
YBR065C	11.9373	0.958642	0.986147	0.972109	0.330996	0.999806
YBR063C	5.04922	1.00926	1.60962	0.627015	0.53065	0.999806
YOR107W	15.6755	-0.507266	0.898847	-0.564352	0.572515	0.999806
YHR024C	6.57561	-0.442197	1.35893	-0.325401	0.744878	0.999806
YBR060C	6.47033	-1.49396	1.42261	-1.05016	0.293646	0.999806
YBR059C	33.2736	0.801968	0.624513	1.28415	0.199089	0.999806
YOL097W-A	7.44768	-0.286285	1.26471	-0.226364	0.820918	0.999806
YMR072W	4.65261	0.269499	1.69389	0.159101	0.873589	0.999806
YHR023W	40.6021	-0.691585	0.572178	-1.20869	0.226782	0.999806
YNL271C	17.7091	-0.233746	0.822743	-0.284106	0.77633	0.999806
YMR071C	8.90578	0.28669	1.23582	0.231984	0.816551	0.999806
YMR138W	4.24978	-1.14327	1.82575	-0.626193	0.531188	0.999806
YOL103W-B	4.45072	-0.159204	1.7398	-0.0915072	0.92709	0.999806
YOL103W-A	4.45072	-0.159204	1.7398	-0.0915072	0.92709	0.999806
YOL103W	12.4065	0.587216	0.985827	0.595658	0.551403	0.999806
YOL102C	1.54319	-1.7712	3.39627	-0.521513	0.602009	0.999806
YMR074C	11.0263	-0.32445	1.03157	-0.31452	0.753126	0.999806
YOL100W	15.8808	-0.00885274	0.862842	-0.01026	0.991814	0.999806
YHR025W	8.52164	0.0729407	1.15744	0.0630191	0.949751	0.999806
YOL038W	5.80449	-0.441385	1.4668	-0.300918	0.763477	0.999806
YNL062C	0.777354	0.903804	4.92745	0.183422	0.854467	0.999806
YMR073C	7.96203	1.09258	1.20942	0.903389	0.36632	0.999806
YHR028C	32.7145	-0.322609	0.647044	-0.498589	0.618069	0.999806
YDR073W	8.99805	-0.51441	1.14796	-0.448109	0.654075	0.999806
YPL020C	9.09182	-0.356025	1.13071	-0.314869	0.752861	0.999806
YMR068W	11.3354	0.0597954	1.02689	0.0582295	0.953566	0.999806
YPR015C	18.9504	-0.598522	0.805965	-0.742615	0.457715	0.999806
YHR027C	14.6776	-1.11192	0.936996	-1.18668	0.235352	0.999806
YMR067C	14.1588	0.486698	0.92326	0.527152	0.598088	0.999806
YJR072C	17.888	-0.569466	0.826025	-0.689404	0.490569	0.999806
YPL149W	5.62034	0.0741433	1.52111	0.048743	0.961124	0.999806
YNL270C	24.2015	-0.121982	0.716187	-0.170321	0.864758	0.999806
YMR070W	23.5429	0.0873419	0.748096	0.116752	0.907056	0.999806
YJR073C	16.8601	0.154906	0.856082	0.180948	0.856408	0.999806
YMR069W	79.2432	-0.354842	0.417628	-0.849661	0.395513	0.999806
YDL121C	10.7422	-0.287249	1.03635	-0.277173	0.781647	0.999806
YDL001W	43.6635	0.0539821	0.55641	0.0970185	0.922712	0.999806
YOL040C	3.86469	-1.49526	1.98614	-0.752848	0.451541	0.999806
YNL065W	25.6596	0.0670687	0.697081	0.0962136	0.923351	0.999806
YMR182W-A	2.90753	0.442362	2.24044	0.197444	0.84348	0.999806
YPL173W	4.24978	-1.14327	1.82575	-0.626193	0.531188	0.999806
YMR184W	12.1046	0.262464	1.00355	0.261535	0.79368	0.999806
YNL269W	25.7845	0.32406	0.712696	0.454696	0.649328	0.999806
YMR183C	11.8037	-0.225934	0.993222	-0.227475	0.820054	0.999806
YDR042C	4.14978	-2.27147	1.98365	-1.1451	0.252169	0.999806
YJR078W	56.4156	-0.258706	0.485981	-0.532337	0.594492	0.999806
YCR034W	5.60883	-0.633894	1.50662	-0.42074	0.673945	0.999806
YPR144C	7.15731	-0.405336	1.28591	-0.315214	0.752599	0.999806
YMR179W	10.0763	0.22084	1.06281	0.207789	0.835394	0.999806
YPL038W	10.1773	0.309363	1.06519	0.290429	0.771488	0.999806
YJR079W	7.45391	-0.123608	1.24864	-0.0989944	0.921143	0.999806
YNL064C	10.8369	-0.299714	1.02986	-0.291025	0.771032	0.999806
YMR292W	7.35825	0.0892259	1.26178	0.0707143	0.943625	0.999806
YMR178W	12.7873	0.320379	0.957477	0.334608	0.737921	0.999806
YKR096W	63.7987	1.2258	0.488055	2.5116	0.0120186	0.999806
YNR017W	4.54015	-0.850864	1.75252	-0.485508	0.627316	0.999806
YMR181C	6.00109	-0.525333	1.48941	-0.352713	0.724304	0.999806
YKR095W-A	8.26826	2.02523	1.28964	1.57038	0.116327	0.999806
YNR013C	38.6161	-0.158622	0.579354	-0.273791	0.784245	0.999806
YNR014W	26.4106	-0.407022	0.690674	-0.589311	0.555653	0.999806
YNR015W	44.024	-0.299016	0.545831	-0.547817	0.583817	0.999806
YMR180C	22.6627	0.134483	0.735604	0.18282	0.854939	0.999806
YNR009W	11.4575	0.953554	1.02094	0.934	0.350304	0.999806
YKR098C	20.5253	0.137967	0.792021	0.174196	0.861711	0.999806
YNR011C	15.214	0.415141	0.881732	0.470824	0.637766	0.999806
YNR012W	12.8776	0.00649167	0.946075	0.00686169	0.994525	0.999806
YNL277W	34.2034	0.316031	0.610628	0.517551	0.604771	0.999806
YER144C	35.6739	0.483317	0.598546	0.807485	0.419387	0.999806
YJL181W	18.0004	-0.271659	0.819284	-0.331581	0.740206	0.999806
YPR145W	57.7717	0.453929	0.478919	0.94782	0.343221	0.999806
YER145C	68.8201	0.456022	0.441847	1.03208	0.302035	0.999806
YKR100C	11.7975	-0.332276	1.0181	-0.32637	0.744145	0.999806
YNL058C	7.57599	1.2518	1.2499	1.00152	0.316574	0.999806
YDR232W	6.4809	-0.421593	1.36395	-0.309098	0.757247	0.999806
YKR099W	18.4759	-0.477124	0.812528	-0.58721	0.557063	0.999806
YER147C	14.8963	-0.389349	0.89182	-0.436578	0.662417	0.999806
YKR102W	26.1591	0.154806	0.699417	0.221336	0.824831	0.999806
YDR238C	11.2893	-1.62358	1.08134	-1.50145	0.13324	0.999806
YKR101W	26.6966	-0.540599	0.693415	-0.779619	0.435615	0.999806
YNL275W	19.0903	0.283671	0.795411	0.356635	0.721365	0.999806
YER149C	22.567	0.202477	0.741269	0.273149	0.784739	0.999806
YDL176W	23.4021	-0.579181	0.73159	-0.791675	0.42855	0.999806
YML074C	2.99696	-0.489212	2.22561	-0.21981	0.826019	0.999806
YER150W	4.26129	-0.0919117	1.7924	-0.0512787	0.959103	0.999806
YCR091W	49.9747	-0.766306	0.519768	-1.47432	0.140394	0.999806
YLR336C	15.964	-0.25774	0.864536	-0.298126	0.765607	0.999806
YKL045W	11.5133	-0.296765	1.00128	-0.296385	0.766936	0.999806
YKL046C	20.181	0.671422	0.796809	0.842638	0.399431	0.999806
YKL043W	10.4605	0.397182	1.09321	0.363316	0.716369	0.999806
YKL044W	11.122	-0.477396	1.02149	-0.467352	0.640248	0.999806
YKL049C	2.52244	0.307193	2.65223	0.115824	0.907792	0.999806
YKL050C	38.4435	0.0141005	0.580005	0.0243109	0.980605	0.999806
YKL047W	20.7248	-0.09457	0.791743	-0.119445	0.904923	0.999806
YKL048C	2.61715	0.239272	2.40408	0.0995275	0.920719	0.999806
YOR106W	3.38922	-0.323149	2.10306	-0.153657	0.87788	0.999806
YPL095C	27.7721	-0.0957107	0.693522	-0.138007	0.890235	0.999806
YPR159W	10.7369	-0.552988	1.04459	-0.529384	0.596539	0.999806
YPL181W	21.3531	0.973935	0.759744	1.28193	0.199869	0.999806
YML011C	7.07316	0.343728	1.28563	0.267361	0.789192	0.999806
YNL274C	9.49994	0.488104	1.09357	0.446338	0.655353	0.999806
YDL103C	1.55471	0.980513	3.43707	0.285276	0.775433	0.999806
YLR079W	2.90224	-0.440805	2.25505	-0.195474	0.845022	0.999806
YNL130C-A	5.23431	0.23706	1.58124	0.14992	0.880827	0.999806
YNL061W	16.064	-0.0989745	0.869581	-0.113819	0.909382	0.999806
YNR001C	63.9537	-0.330859	0.458833	-0.721088	0.470855	0.999806
YPL021W	7.46448	0.536618	1.24671	0.430427	0.666885	0.999806
YMR035W	4.55695	0.594951	1.7043	0.349088	0.727023	0.999806
YPL094C	10.2499	-0.599271	1.06495	-0.56272	0.573625	0.999806
YNL001W	11.5292	0.368713	1.00503	0.366869	0.713717	0.999806
YOR123C	15.7063	0.558646	0.865573	0.645406	0.518664	0.999806
YPL150W	16.4563	-0.0791487	0.848437	-0.0932877	0.925675	0.999806
YNL273W	17.4355	0.0860918	0.830998	0.103601	0.917486	0.999806
YDR001C	74.7035	0.293125	0.424667	0.690246	0.49004	0.999806
YOR215C	7.53183	-1.15919	1.28841	-0.899705	0.368277	0.999806
YMR031C	24.0491	0.599616	0.715939	0.837524	0.402298	0.999806
YDR002W	0.581694	-0.0943944	5.75197	-0.0164108	0.986907	0.999806
YNL129W	7.38033	1.18129	1.26653	0.932697	0.350977	0.999806
YNL059C	4.83053	-0.616782	1.71319	-0.36002	0.718832	0.999806
YHR106W	7.55391	0.196348	1.24237	0.158044	0.874422	0.999806
YMR032W	5.63091	0.904129	1.50534	0.600617	0.548095	0.999806
YHR104W	5.92129	0.973002	1.44411	0.673773	0.500456	0.999806
YHR105W	2.90753	0.442362	2.24044	0.197444	0.84348	0.999806
YHR102W	14.3093	-0.611817	0.912635	-0.670386	0.502612	0.999806
YHR103W	25.9404	-0.16092	0.693371	-0.232084	0.816473	0.999806
YHR100C	5.04393	0.55787	1.61062	0.346371	0.729064	0.999806
YHR101C	3.08733	-2.8956	2.50725	-1.15489	0.248136	0.999806
YHR098C	20.7229	0.0416886	0.765314	0.0544725	0.956559	0.999806
YHR099W	49.9011	-0.516543	0.517516	-0.99812	0.318221	0.999806
YLL006W	2.72338	1.3887	2.52821	0.549282	0.582812	0.999806
YDL190C	37.0782	-0.0383953	0.589334	-0.0651503	0.948054	0.999806
YKR025W	11.3209	3.47875	1.17609	2.95788	0.00309758	0.931916
YLL010C	31.4786	-1.51436	0.663917	-2.28095	0.0225513	0.999806
YLL011W	13.3531	-0.26955	0.933755	-0.288674	0.772831	0.999806
YLL012W	31.643	-0.198022	0.636462	-0.31113	0.755702	0.999806
YPR192W	17.5178	-0.0515011	0.836478	-0.061569	0.950906	0.999806
YMR027W	16.8812	0.713277	0.84429	0.844826	0.398208	0.999806
YDL195W	8.11786	-0.444918	1.27129	-0.349974	0.726358	0.999806
YDL197C	24.3289	0.427313	0.711548	0.600539	0.548147	0.999806
YDL193W	3.48922	0.365922	2.00684	0.182338	0.855318	0.999806
YDL194W	15.7861	0.000201439	0.869938	0.000231555	0.999815	0.999841
YLL004W	4.25601	-0.759651	1.82418	-0.416434	0.677092	0.999806
YLL005C	20.6104	-0.190187	0.774113	-0.245684	0.805927	0.999806
YLR188W	26.1342	-0.0162455	0.702326	-0.023131	0.981546	0.999806
YLR187W	31.7934	0.452948	0.630674	0.718197	0.472636	0.999806
YLR190W	18.1225	0.344339	0.811605	0.424269	0.671369	0.999806
YLR189C	27.471	0.944935	0.679487	1.39066	0.164328	0.999806
YLR192C	2.42149	-0.0815829	2.51834	-0.0323956	0.974157	0.999806
YLR191W	9.20333	0.319729	1.11686	0.286274	0.774668	0.999806
YLR194C	12.3463	1.38212	1.00934	1.36933	0.170895	0.999806
YLR193C	8.33655	0.559679	1.17734	0.475378	0.634518	0.999806
YLR196W	12.2003	0.135646	0.97879	0.138586	0.889777	0.999806
YOR343W-B	13.7339	-0.538489	0.927436	-0.580621	0.561496	0.999806
YPR041W	8.0356	-0.116472	1.19894	-0.0971459	0.922611	0.999806
YPL092W	21.617	0.457578	0.750617	0.609602	0.542126	0.999806
YLR017W	8.71824	0.00543747	1.16256	0.00467713	0.996268	0.999806
YLR016C	8.33221	0.107035	1.18418	0.0903871	0.92798	0.999806
YOL062C	11.6363	0.528748	0.994473	0.531686	0.594943	0.999806
YLR009W	0.967729	-1.00651	4.5111	-0.223118	0.823444	0.999806
YLR011W	15.9703	-0.181571	0.860943	-0.210898	0.832967	0.999806
YLR013W	3.95846	-1.00224	1.93743	-0.517302	0.604946	0.999806
YLR012C	3.30508	1.14579	2.26492	0.505884	0.612938	0.999806
YLR015W	9.87974	0.283714	1.08302	0.261964	0.793349	0.999806
YLR014C	28.9868	0.483278	0.657997	0.734469	0.462663	0.999806
YBR274W	12.5935	0.040241	0.973644	0.0413303	0.967033	0.999806
YBR275C	63.3162	-0.0808548	0.461106	-0.17535	0.860805	0.999806
YBR276C	28.1715	-0.0929953	0.667824	-0.139251	0.889252	0.999806
YJL091C	3.18733	-1.14351	2.17227	-0.526411	0.598602	0.999806
YBR270C	14.6439	0.660576	0.893509	0.739305	0.459722	0.999806
YBR271W	21.8757	-0.199501	0.752309	-0.265185	0.790867	0.999806
YBR272C	8.71824	0.00543747	1.16256	0.00467713	0.996268	0.999806
YBR273C	9.5956	0.329592	1.09274	0.30162	0.762942	0.999806
YLR234W	7.56542	0.645024	1.23731	0.52131	0.602151	0.999806
YPR042C	16.0976	0.641153	0.85672	0.748381	0.454231	0.999806
YPL091W	18.5076	0.367197	0.806584	0.45525	0.64893	0.999806
YBR279W	8.05674	1.07074	1.20801	0.886371	0.375418	0.999806
YBR280C	26.7177	-0.123873	0.684408	-0.180994	0.856373	0.999806
YGR289C	19.1061	0.653548	0.79369	0.82343	0.410263	0.999806
YGR292W	8.81201	0.14952	1.14259	0.130861	0.895885	0.999806
YHR013C	6.39147	0.0176531	1.36873	0.0128975	0.98971	0.999806
YGR295C	12.805	0.659971	0.955101	0.690996	0.489568	0.999806
YHR019C	4.35072	-0.790974	1.77948	-0.444498	0.656683	0.999806
YHL050C	0.866784	-3.58748	4.90162	-0.731895	0.464233	0.999806
YHR017W	22.6017	-1.08144	0.762256	-1.41874	0.155975	0.999806
YHL048C-A	2.8013	-0.904939	2.33844	-0.386984	0.698768	0.999806
YHL048W	9.77351	-0.0707754	1.0973	-0.0644995	0.948572	0.999806
YHL047C	29.6411	0.189877	0.650944	0.291695	0.77052	0.999806
YPR152C	31.889	0.405647	0.630248	0.643631	0.519815	0.999806
YHR021W-A	15.3275	0.599962	0.896828	0.668982	0.503507	0.999806
YLR061W	2.42149	-0.0815829	2.51834	-0.0323956	0.974157	0.999806
YPL067C	29.92	0.0912334	0.653676	0.13957	0.889	0.999806
YNL055C	14.852	0.831007	0.916601	0.906617	0.364609	0.999806
YJR066W	71.8538	-0.495735	0.438036	-1.13172	0.257751	0.999806
YJL090C	12.9671	-0.207233	0.946243	-0.219006	0.826646	0.999806
YJR068W	3.47865	-1.31191	2.08837	-0.628197	0.529875	0.999806
YJR067C	1.93451	-0.183437	2.86416	-0.0640456	0.948934	0.999806
YJR062C	9.38219	-0.263823	1.12265	-0.235001	0.814208	0.999806
YJR061W	46.9474	-0.0790428	0.529511	-0.149275	0.881337	0.999806
YJR064W	20.0234	-0.332313	0.785714	-0.422944	0.672336	0.999806
YJR063W	4.0594	-0.64551	1.85693	-0.347622	0.728124	0.999806
YLR407W	4.95884	1.81311	1.69803	1.06777	0.285624	0.999806
YLR406C-A	6.00543	0.159716	1.42287	0.112249	0.910626	0.999806
YLR406C	5.33959	1.08118	1.5501	0.697486	0.485498	0.999806
YLR405W	13.3016	1.0882	0.938754	1.15919	0.246379	0.999806
YJR070C	6.50921	1.02706	1.42842	0.719021	0.472128	0.999806
YJR069C	6.31789	1.52268	1.40474	1.08396	0.278382	0.999806
YLR409C	17.7995	-0.485769	0.828015	-0.586667	0.557428	0.999806
YLR408C	5.44054	1.21489	1.54029	0.788741	0.430264	0.999806
YOR114W	8.63315	0.73062	1.15106	0.634734	0.525602	0.999806
YOR115C	3.78054	0.160013	1.96239	0.0815397	0.935013	0.999806
YOR112W	10.2835	0.620292	1.07037	0.579513	0.562243	0.999806
YOR113W	10.5792	0.882326	1.04315	0.845826	0.39765	0.999806
YOR118W	21.8791	0.0511123	0.757471	0.0674776	0.946201	0.999806
YOR119C	12.6671	-0.871113	0.993024	-0.877233	0.38036	0.999806
YOR116C	15.6957	0.255634	0.864426	0.295727	0.767439	0.999806
YOR117W	6.10015	0.135219	1.41592	0.0954989	0.923919	0.999806
YPR153W	13.1407	-0.920171	0.959384	-0.959126	0.337495	0.999806
YDL168W	19.1955	0.523656	0.791588	0.661526	0.508275	0.999806
YOR120W	22.877	0.309021	0.757053	0.40819	0.683135	0.999806
YOR122C	0.866784	-3.58748	4.90162	-0.731895	0.464233	0.999806
YNL054W-B	20.3032	-0.574748	0.784803	-0.732347	0.463957	0.999806
YJL089W	20.2148	-0.500514	0.780036	-0.641655	0.521097	0.999806
YLR378C	10.1605	-0.303052	1.0634	-0.284984	0.775656	0.999806
YLR238W	10.4898	1.11467	1.05743	1.05414	0.29182	0.999806
YPR049C	26.1562	0.311896	0.698549	0.446491	0.655243	0.999806
YPL089C	14.829	0.388181	0.886684	0.437789	0.661539	0.999806
YNL185C	0.967729	-1.00651	4.5111	-0.223118	0.823444	0.999806
YLR040C	7.9356	-0.440948	1.23014	-0.358453	0.720004	0.999806
YPL023C	8.32692	-0.200494	1.19363	-0.16797	0.866607	0.999806
YDL015C	1.2581	-0.143459	3.59569	-0.0398976	0.968175	0.999806
YPL139C	7.50865	2.80466	1.36891	2.04883	0.0404786	0.999806
YMR295C	8.99087	-0.486639	1.15212	-0.422387	0.672742	0.999806
YHR214C-E	3.7796	0.513431	1.92355	0.266918	0.789532	0.999806
YPL140C	17.0654	0.558145	0.833652	0.669517	0.503165	0.999806
YPL223C	10.1648	0.0995337	1.07496	0.0925933	0.926227	0.999806
YPL143W	1.94074	0.400313	3.0572	0.130941	0.895822	0.999806
YOL165C	4.74733	0.236385	1.65761	0.142606	0.886602	0.999806
YJL088W	18.0216	0.295329	0.813455	0.363055	0.716564	0.999806
YPL148C	2.40998	-2.49131	2.77847	-0.896647	0.369908	0.999806
YPL147W	18.7936	0.195634	0.798674	0.244949	0.806496	0.999806
YGR161C	14.7563	0.932668	0.902468	1.03346	0.301387	0.999806
YGR161W-C	9.8922	0.489468	1.08989	0.449099	0.65336	0.999806
YIL074C	35.4048	-0.262126	0.621169	-0.421989	0.673033	0.999806
YIL073C	23.8083	-0.0756186	0.729875	-0.103605	0.917483	0.999806
YGR156W	12.5829	-0.379218	0.988736	-0.383538	0.701321	0.999806
YGR157W	17.5061	1.66442	0.847072	1.96491	0.0494251	0.999806
YGR158C	4.55167	0.0665207	1.70333	0.0390532	0.968848	0.999806
YGR159C	4.36129	0.442742	1.75048	0.252927	0.800325	0.999806
YLR019W	24.8789	-0.183721	0.713939	-0.257335	0.79692	0.999806
YLR018C	8.79521	-0.61239	1.16876	-0.523966	0.600302	0.999806
YLR021W	1.45376	0.441979	3.32188	0.133051	0.894153	0.999806
YLR020C	19.2585	-0.263086	0.794701	-0.331051	0.740606	0.999806
YGR161C-D	0.777354	0.903804	4.92745	0.183422	0.854467	0.999806
YLR022C	5.90449	-0.00261118	1.44798	-0.00180333	0.998561	0.999806
YIL070C	3.00224	0.38518	2.24351	0.171686	0.863684	0.999806
YLR024C	75.1404	-0.093605	0.445074	-0.210313	0.833423	0.999806
YPR005C	9.96483	-0.402546	1.07564	-0.374239	0.708226	0.999806
YPR006C	41.7582	0.261813	0.556743	0.470259	0.63817	0.999806
YPR003C	22.0642	-0.145601	0.750687	-0.193957	0.846209	0.999806
YOR298C-A	14.529	-0.084469	0.933762	-0.090461	0.927921	0.999806
YPR001W	101.508	-0.15883	0.383826	-0.413808	0.679015	0.999806
YPR002W	68.4812	0.151238	0.442434	0.341832	0.732477	0.999806
YPL002C	9.38842	-0.134683	1.10309	-0.122096	0.902823	0.999806
YPL001W	37.3739	0.0490306	0.589163	0.0832207	0.933676	0.999806
YNL151C	8.49955	-1.14261	1.19664	-0.95485	0.339654	0.999806
YOL166W-A	8.90144	-0.157738	1.14507	-0.137754	0.890435	0.999806
YJL087C	3.09167	-0.53715	2.24506	-0.239259	0.810905	0.999806
YGR171C	10.9484	0.264009	1.01949	0.258961	0.795665	0.999806
YNL233W	30.3398	-0.823656	0.670608	-1.22822	0.219363	0.999806
YPR008W	40.3382	-0.349132	0.572002	-0.610368	0.541618	0.999806
YPL179W	16.2427	1.65645	0.880191	1.88192	0.0598466	0.999806
YNL317W	9.78069	-0.100104	1.09314	-0.091574	0.927036	0.999806
YPR047W	11.4124	-0.39602	1.01207	-0.391298	0.695577	0.999806
YGL237C	12.1392	1.08026	0.983671	1.09819	0.272121	0.999806
YML116W	19.9402	-0.12822	0.779714	-0.164444	0.869381	0.999806
YPR010C-A	3.98054	1.26639	1.91458	0.661443	0.508328	0.999806
YPL127C	10.3677	0.14732	1.06045	0.138921	0.889512	0.999806
YPL128C	5.79826	-0.680436	1.49028	-0.456583	0.647971	0.999806
YNL046W	15.6674	-0.392066	0.879097	-0.445987	0.655607	0.999806
YNL314W	12.9671	-0.207233	0.946243	-0.219006	0.826646	0.999806
YCR020C	9.8922	0.489468	1.08989	0.449099	0.65336	0.999806
YNL052W	6.40732	1.12506	1.38416	0.812812	0.416326	0.999806
YJL085W	9.95332	-0.852951	1.09139	-0.781529	0.434491	0.999806
YNL054W	14.6901	-0.884669	0.908229	-0.974059	0.330027	0.999806
YNL054W-A	10.8254	-0.695833	1.04543	-0.665598	0.505668	0.999806
YNL048W	7.05108	-1.04464	1.32625	-0.78766	0.430896	0.999806
YNL049C	13.6382	-0.413037	0.928202	-0.444986	0.65633	0.999806
YNL050C	11.508	-0.54608	1.006	-0.542821	0.587253	0.999806
YML120C	27.7508	0.794794	0.674466	1.17841	0.238635	0.999806
YGL083W	24.4876	-0.259602	0.719756	-0.36068	0.718339	0.999806
YGL084C	3.37771	-1.9331	2.18091	-0.886372	0.375417	0.999806
YDR453C	19.1787	0.220592	0.794237	0.27774	0.781212	0.999806
YDR452W	23.7587	0.578905	0.721252	0.802639	0.422183	0.999806
YDR451C	12.6252	1.1534	0.962635	1.19817	0.230852	0.999806
YGL080W	4.35072	-0.790974	1.77948	-0.444498	0.656683	0.999806
YDR449C	5.32374	-0.273642	1.55405	-0.176083	0.860229	0.999806
YDR448W	2.8979	-2.81173	2.79906	-1.00453	0.315124	0.999806
YIL166C	31.0632	-0.297203	0.642257	-0.462747	0.643546	0.999806
YGL077C	26.6734	0.55199	0.708357	0.779254	0.43583	0.999806
YGL078C	3.60074	1.89173	2.0333	0.930371	0.352179	0.999806
YIL163C	17.238	0.201022	0.841478	0.238891	0.81119	0.999806
YGR163W	2.52149	0.820514	2.46525	0.332832	0.739261	0.999806
YDR458C	14.6208	0.194561	0.917794	0.211988	0.832116	0.999806
YDR457W	63.4088	0.510969	0.460295	1.11009	0.26696	0.999806
YDR162C	0.967729	-1.00651	4.5111	-0.223118	0.823444	0.999806
YDR161W	0.973014	1.48712	4.4059	0.337529	0.735718	0.999806
YLR060W	11.2441	0.529718	1.01285	0.522998	0.600975	0.999806
YGR162W	8.41012	-0.719805	1.1826	-0.608665	0.542746	0.999806
YLR449W	9.68597	-0.0852813	1.11573	-0.0764352	0.939073	0.999806
YLR448W	3.29885	0.857946	2.0836	0.411761	0.680515	0.999806
YER023W	2.79601	-2.72892	2.59934	-1.04985	0.293788	0.999806
YER022W	11.9046	-0.136243	0.983328	-0.138553	0.889803	0.999806
YDR152W	5.63714	1.10812	3.69242	0.300108	0.764095	0.999806
YDR151C	13.5478	-0.0907688	0.938822	-0.0966838	0.922978	0.999806
YER019C-A	4.0594	-0.64551	1.85693	-0.347622	0.728124	0.999806
YDR153C	11.546	0.858987	1.00011	0.858895	0.390399	0.999806
YDR158W	6.30732	0.791669	1.38437	0.571863	0.567415	0.999806
YDR156W	6.11166	0.692349	1.41137	0.490552	0.623744	0.999806
YER016W	8.33126	0.273371	1.17247	0.233157	0.815639	0.999806
YER015W	19.8331	-0.242589	0.790412	-0.306914	0.758909	0.999806
YOR354C	27.31	0.066442	0.676053	0.0982793	0.921711	0.999806
YOR355W	5.72563	0.873523	1.47428	0.592508	0.553511	0.999806
YPL133C	34.5611	0.0101097	0.613135	0.0164885	0.986845	0.999806
YDL132W	8.72258	0.443481	1.14446	0.387504	0.698383	0.999806
YOR348C	269.627	-0.183715	0.232837	-0.789029	0.430095	0.999806
YOR349W	63.2729	-0.40009	0.464309	-0.861688	0.388859	0.999806
YOR346W	39.1199	0.0097482	0.574781	0.0169598	0.986469	0.999806
YOR347C	11.7541	1.06513	1.03262	1.03148	0.302317	0.999806
YOR352W	11.6301	0.443461	0.993159	0.446516	0.655225	0.999806
YLR142W	14.9688	1.33561	0.923303	1.44656	0.148021	0.999806
YOR350C	12.9733	-0.115607	0.947395	-0.122026	0.902878	0.999806
YOR351C	25.1727	0.0633093	0.708504	0.0893562	0.928799	0.999806
YPR179C	32.7434	0.278109	0.627404	0.443269	0.657571	0.999806
YPL235W	12.3748	-0.684627	0.976012	-0.701454	0.48302	0.999806
YDR313C	9.80277	0.739125	1.11189	0.664746	0.506213	0.999806
YDR312W	15.3078	0.492644	0.927591	0.531101	0.595349	0.999806
YNL330C	7.25202	-0.424066	1.28741	-0.329395	0.741857	0.999806
YJL083W	30.9675	-0.244598	0.640657	-0.381793	0.702615	0.999806
YPL234C	1.64414	-0.686413	3.13936	-0.218647	0.826925	0.999806
YDR307W	14.5165	-0.249072	0.899453	-0.276915	0.781845	0.999806
YDR306C	15.0246	0.435473	0.881621	0.493946	0.621344	0.999806
YDR305C	15.9852	0.379151	0.875559	0.433039	0.664986	0.999806
YDR304C	14.4314	0.215594	0.902698	0.238832	0.811236	0.999806
YDR311W	3.39451	0.413839	2.07671	0.199276	0.842047	0.999806
YDR310C	32.2707	0.260063	0.636907	0.408321	0.683038	0.999806
YDR309C	14.4376	0.288672	0.897303	0.32171	0.747672	0.999806
YDR308C	0.581694	-0.0943944	5.75197	-0.0164108	0.986907	0.999806
YEL068C	5.21751	-1.11905	1.60331	-0.697962	0.485201	0.999806
YEL069C	19.6215	-0.745084	0.796928	-0.934945	0.349817	0.999806
YMR004W	26.0562	0.224649	0.693188	0.324081	0.745877	0.999806
YEL075C	0.386035	-2.53664	6.1141	-0.414884	0.678227	0.999806
YHR076W	6.49769	0.531667	1.36009	0.390905	0.695868	0.999806
YMR003W	12.8786	-0.10473	0.957796	-0.109344	0.912929	0.999806
YEL077C	19.2638	-0.12412	0.792255	-0.156667	0.875508	0.999806
YEL070W	13.7391	-0.329248	0.922649	-0.356851	0.721204	0.999806
YEL071W	32.8692	0.431754	0.641666	0.672865	0.501033	0.999806
YEL072W	25.85	0.00082363	0.694098	0.00118662	0.999053	0.999841
YEL073C	4.75356	0.455788	1.72034	0.264941	0.791055	0.999806
YNL134C	21.6108	0.410679	0.753523	0.545012	0.585746	0.999806
YKL188C	22.2704	0.125209	0.751236	0.166671	0.867629	0.999806
YPL166W	8.42692	0.0897639	1.16635	0.0769616	0.938654	0.999806
YDL049C	24.7317	0.618098	0.709697	0.870932	0.383791	0.999806
YKL189W	3.77431	-0.142852	1.91785	-0.0744855	0.940624	0.999806
YLR381W	15.4169	0.438434	0.885621	0.495058	0.620559	0.999806
YPL236C	20.5104	-0.316317	0.772753	-0.409338	0.682291	0.999806
YLR141W	4.36129	0.442742	1.75048	0.252927	0.800325	0.999806
YNL018C	7.05636	-0.576356	1.31256	-0.439107	0.660584	0.999806
YER096W	13.3805	0.558254	0.929137	0.600831	0.547953	0.999806
YER095W	7.25202	-0.424066	1.28741	-0.329395	0.741857	0.999806
YER094C	3.96374	-0.221142	1.95109	-0.113343	0.909759	0.999806
YER093C-A	5.52374	0.589622	1.54512	0.381602	0.702756	0.999806
YER101C	18.9797	-0.101669	0.812478	-0.125134	0.900417	0.999806
YER100W	3.28828	-0.687202	2.10905	-0.325835	0.744549	0.999806
YER099C	11.4167	-0.0275146	1.05341	-0.0261196	0.979162	0.999806
YER098W	20.4421	0.318251	0.774322	0.411006	0.681068	0.999806
YLR138W	31.3747	0.0634667	0.63491	0.0999619	0.920375	0.999806
YER103W	19.6268	-0.586198	0.794886	-0.737461	0.460842	0.999806
YDL239C	9.20956	0.430407	1.11281	0.386776	0.698922	0.999806
YDR076W	26.2317	-0.187179	0.692762	-0.270193	0.787012	0.999806
YLR137W	41.1924	0.440219	0.561464	0.784056	0.433007	0.999806
YHR075C	15.2308	0.786174	0.879171	0.894221	0.371203	0.999806
YLR136C	10.0658	-0.28971	1.07375	-0.269811	0.787306	0.999806
YLR382C	14.1252	-0.386531	0.912737	-0.423486	0.671941	0.999806
YOR341W	8.99805	-0.51441	1.14796	-0.448109	0.654075	0.999806
YLR048W	0.386035	-2.53664	6.1141	-0.414884	0.678227	0.999806
YLR135W	25.9615	0.230501	0.691848	0.333167	0.739009	0.999806
YOL017W	31.2685	-0.0497395	0.636967	-0.078088	0.937758	0.999806
YLR049C	10.1763	0.44349	1.05862	0.418933	0.675265	0.999806
YMR217W	1.8398	-0.102231	2.92595	-0.0349396	0.972128	0.999806
YKL181W	12.2844	-0.305333	0.979976	-0.311572	0.755366	0.999806
YMR219W	38.532	-0.0193965	0.579065	-0.0334963	0.973279	0.999806
YMR218C	1.8398	-0.102231	2.92595	-0.0349396	0.972128	0.999806
YMR221C	26.5168	-0.259123	0.688664	-0.376269	0.706717	0.999806
YMR220W	9.57785	-0.164084	1.10955	-0.147883	0.882435	0.999806
YMR223W	12.4474	-1.79144	1.03207	-1.73576	0.0826054	0.999806
YKL182W	30.2849	-0.285377	0.647599	-0.440669	0.659453	0.999806
YMR225C	7.45825	0.400516	1.28513	0.311654	0.755303	0.999806
YMR224C	17.9101	-0.0346759	0.817097	-0.0424379	0.96615	0.999806
YOL161C	4.6411	-0.557947	1.6986	-0.328475	0.742552	0.999806
YFL036W	31.1118	-0.871394	0.659163	-1.32197	0.186178	0.999806
YIR003W	35.0437	-0.100594	0.604796	-0.166328	0.867899	0.999806
YOL063C	22.0785	-0.168377	0.781718	-0.215393	0.829461	0.999806
YBR076W	19.3806	0.314249	0.787772	0.398909	0.68996	0.999806
YBR077C	1.45376	0.441979	3.32188	0.133051	0.894153	0.999806
YBR073W	19.0759	0.314185	0.869297	0.361425	0.717782	0.999806
YBR074W	44.635	-0.0935559	0.548673	-0.170513	0.864607	0.999806
YBR072W	18.661	-0.74325	0.817035	-0.909692	0.362985	0.999806
YBR072C-A	13.1627	-0.136816	0.938899	-0.14572	0.884142	0.999806
YBR070C	1.45376	0.441979	3.32188	0.133051	0.894153	0.999806
YBR071W	11.8267	0.387416	0.989335	0.391592	0.69536	0.999806
YBR068C	52.2995	0.0919212	0.502439	0.18295	0.854837	0.999806
YBR069C	36.446	0.429503	0.592846	0.724476	0.468773	0.999806
YOR261C	1.92923	-2.14404	3.05263	-0.70236	0.482454	0.999806
YLR145W	1.73885	-0.769778	3.06714	-0.250976	0.801833	0.999806
YOL105C	15.7631	-0.500781	0.871827	-0.574404	0.565695	0.999806
YOL107W	12.5084	0.544501	0.958966	0.5678	0.570171	0.999806
YOL108C	4.84827	0.420932	1.65068	0.255005	0.798719	0.999806
YNL034W	6.59769	0.858809	1.34609	0.638005	0.523471	0.999806
YOL110W	70.0185	1.18325	0.44421	2.66372	0.0077282	0.999806
YOL111C	13.8675	0.54535	0.918761	0.593571	0.552799	0.999806
YOL112W	19.2965	0.566651	0.790108	0.717181	0.473262	0.999806
YOL113W	22.6617	0.195694	0.74525	0.262589	0.792867	0.999806
YOL114C	7.73806	-0.17915	1.2558	-0.142658	0.886561	0.999806
YIL091C	26.3087	-0.392592	0.694752	-0.565083	0.572017	0.999806
YFL038C	6.77127	-0.289954	1.331	-0.217846	0.827549	0.999806
YNL032W	4.65167	0.558431	1.70642	0.327253	0.743477	0.999806
YDL177C	7.18033	0.602161	1.31505	0.457901	0.647023	0.999806
YOL057W	20.1359	-0.0838296	0.775973	-0.108032	0.913971	0.999806
YNL033W	1.44848	-1.68559	3.48018	-0.484341	0.628144	0.999806
YPR114W	17.9303	0.587185	0.852854	0.688494	0.491142	0.999806
YDL092W	12.0897	-0.518508	0.982448	-0.527771	0.597658	0.999806
YLR348C	41.8105	0.610267	0.588025	1.03783	0.299351	0.999806
YIL005W	50.0992	-0.345213	0.535827	-0.644262	0.519406	0.999806
YIL004C	1.93451	-0.183437	2.86416	-0.0640456	0.948934	0.999806
YOR269W	16.3005	0.657788	0.878082	0.749119	0.453785	0.999806
YOR270C	17.8942	-0.49325	0.823477	-0.598984	0.549183	0.999806
YLR047C	23.2833	0.727675	0.729252	0.997837	0.318358	0.999806
YNL025C	7.53711	-0.69923	1.2752	-0.54833	0.583465	0.999806
YPR113W	3.00319	-0.0693278	2.23615	-0.0310032	0.975267	0.999806
YNL026W	4.0594	-0.64551	1.85693	-0.347622	0.728124	0.999806
YNL308C	4.25506	-0.382034	1.79453	-0.212888	0.831414	0.999806
YPL052W	6.58712	0.143063	1.34202	0.106603	0.915104	0.999806
YDR100W	7.74523	-0.214144	1.23614	-0.173236	0.862466	0.999806
YOR094W	3.59017	0.605384	2.0097	0.301231	0.763238	0.999806
YDL160C	7.34768	-0.664202	1.27232	-0.522041	0.601642	0.999806
[truncated: 3,687 more rows]

## Sheet: 1740
gene	baseMean	log2FoldChange	lfcSE	stat	pvalue	padj
YNL333W	5.65152	-0.739116	1.4447	-0.511606	0.608927	0.999929
YBR257W	6.75164	-0.415832	1.28355	-0.323969	0.745961	0.999929
YPL141C	25.6929	-0.327773	0.721285	-0.454429	0.64952	0.999929
YBR258C	5.31649	-0.620674	1.49308	-0.415701	0.677629	0.999929
YPR030W	29.8682	0.213163	0.675307	0.315654	0.752265	0.999929
YPL068C	9.9424	1.42918	1.11649	1.28006	0.200524	0.999929
YMR323W	5.13507	-0.963682	1.55082	-0.6214	0.534336	0.999929
YOL030W	16.1484	-1.20565	0.918333	-1.31287	0.189228	0.999929
YBR255C-A	3.32682	0.818776	2.12131	0.385977	0.699514	0.999929
YDL054C	27.4147	0.303685	0.690507	0.4398	0.660082	0.999929
YKL224C	1.9516	0.446437	2.7711	0.161104	0.872011	0.999929
YJR161C	1.26696	-0.98072	3.02363	-0.324352	0.745672	0.999929
YIL123W	19.1942	0.478187	0.820668	0.58268	0.560109	0.999929
YJR156C	5.40422	-0.273644	1.46989	-0.186166	0.852315	0.999929
YJR160C	1.01238	-0.511841	2.69174	-0.190152	0.84919	0.999929
YJR153W	7.29292	-1.5584	1.3542	-1.15079	0.249817	0.999929
YJR152W	9.58253	0.131225	1.07802	0.121727	0.903115	0.999929
YJR155W	13.063	0.166314	0.957491	0.173698	0.862103	0.999929
YJR154W	8.83498	-1.2167	1.17694	-1.03379	0.301236	0.999929
YBL068W	8.76614	0.700991	1.10834	0.632472	0.527079	0.999929
YBL069W	24.8106	0.0310484	0.726397	0.042743	0.965906	0.999929
YBL066C	33.1335	0.146237	0.632329	0.231267	0.817107	0.999929
YBL067C	5.19797	0.710145	1.50027	0.473346	0.635966	0.999929
YBL072C	3.70721	-0.899689	1.97893	-0.454635	0.649372	0.999929
YBL074C	10.6826	0.22298	1.02639	0.217248	0.828015	0.999929
YBL071W-A	2.3876	0.613793	2.80924	0.218491	0.827047	0.999929
YBR252W	2.59385	-2.14377	2.75137	-0.779167	0.435881	0.999929
YBL063W	34.797	-0.431189	0.624341	-0.69063	0.489798	0.999929
YBL064C	11.164	-0.190216	1.01447	-0.187502	0.851267	0.999929
YOL031C	18.6311	0.531363	0.846362	0.62782	0.530122	0.999929
YBR253W	1.16599	-3.5793	3.20737	-1.11596	0.264439	0.999929
YDL051W	14.0184	-0.656176	0.992763	-0.66096	0.508638	0.999929
YIL130W	32.1065	0.0588951	0.640134	0.0920044	0.926695	0.999929
YKR039W	25.0768	1.36234	0.729734	1.8669	0.0619162	0.999929
YPL171C	32.1476	0.151133	0.657146	0.229983	0.818105	0.999929
YIL129C	43.6304	-0.752793	0.57671	-1.30532	0.191783	0.999929
YLR098C	7.82692	0.619275	1.16617	0.531032	0.595397	0.999929
YOR320C	11.1991	0.255264	1.0053	0.253918	0.799559	0.999929
YOR014W	13.9889	0.269607	0.936181	0.287986	0.773357	0.999929
YLR099C	14.5713	0.0504362	0.912641	0.055264	0.955928	0.999929
YPL070W	14.4177	0.186194	0.915975	0.203274	0.838921	0.999929
YOR012W	2.05986	1.80848	2.76298	0.65454	0.512764	0.999929
YOL032W	8.54234	-0.178459	1.13235	-0.157601	0.874771	0.999929
YDL052C	13.7022	0.643109	0.932737	0.689486	0.490518	0.999929
YMR001C-A	10.5393	-0.590347	1.05643	-0.558813	0.57629	0.999929
YCL057W	39.8398	-0.383502	0.598614	-0.64065	0.52175	0.999929
YPR108W	9.88975	-0.285158	1.06796	-0.267011	0.78946	0.999929
YMR001C	6.99596	0.906063	1.24559	0.727416	0.466971	0.999929
YCL057C-A	6.13719	0.810481	1.33204	0.608452	0.542887	0.999929
YCL058W-A	5.50519	-0.00662763	1.42867	-0.00463903	0.996299	0.999929
YKL090W	25.0973	-0.19602	0.741554	-0.264337	0.791521	0.999929
YKL091C	10.0434	-0.503166	1.06851	-0.470905	0.637708	0.999929
YKL088W	7.26809	-0.305756	1.2255	-0.249495	0.802978	0.999929
YKL089W	0.670062	-2.88605	2.75196	-1.04873	0.294304	0.999929
YKL086W	43.5602	0.0960507	0.552277	0.173918	0.86193	0.999929
YKL087C	15.4797	0.658178	0.892348	0.73758	0.46077	0.999929
YKL084W	22.7259	-0.930346	0.781751	-1.19008	0.234015	0.999929
YKL085W	14.6517	0.0417066	0.910652	0.0457986	0.963471	0.999929
YKL081W	11.8589	0.902012	1.00022	0.901817	0.367154	0.999929
YKL082C	5.73197	-0.758563	1.42548	-0.532147	0.594624	0.999929
YOL033W	5.32081	1.84886	1.49568	1.23613	0.216409	0.999929
YCL059C	2.69482	-1.05807	2.49582	-0.423936	0.671612	0.999929
YOR104W	5.75978	-0.114952	1.40911	-0.0815781	0.934982	0.999929
YKR030W	5.17745	0.459436	1.5002	0.30625	0.759415	0.999929
YKR029C	15.2324	0.812369	0.933958	0.869812	0.384403	0.999929
YPL271W	1.53612	1.07157	2.798	0.382976	0.701737	0.999929
YNL196C	14.128	-0.11878	0.926131	-0.128254	0.897948	0.999929
YML001W	11.1683	0.965407	1.01093	0.954971	0.339592	0.999929
YPL270W	21.4312	0.0568521	0.776449	0.0732207	0.941631	0.999929
YML002W	32.7401	-0.259966	0.66478	-0.391056	0.695756	0.999929
YPR007C	18.7261	0.69422	0.82189	0.844663	0.398299	0.999929
YDL213C	9.92485	0.225066	1.05559	0.213213	0.831161	0.999929
YNL301C	16.1176	-0.5076	0.890005	-0.570334	0.568451	0.999929
YOR373W	13.493	0.348366	0.938151	0.371332	0.71039	0.999929
YMR300C	1.42057	-3.895	3.35191	-1.16202	0.245226	0.999929
YPL228W	6.74435	-0.720706	1.29426	-0.556847	0.577632	0.999929
YPL072W	12.9488	0.0829243	0.984432	0.0842357	0.932869	0.999929
YPL207W	25.0301	-0.199055	0.72532	-0.274437	0.783748	0.999929
YOL026C	1.27425	0.487099	2.72859	0.178517	0.858317	0.999929
YDR032C	9.13195	-0.32467	1.11473	-0.291255	0.770856	0.999929
YNL219C	10.0185	0.18639	1.09474	0.17026	0.864806	0.999929
YJL141C	28.7638	-0.293996	0.719398	-0.40867	0.682782	0.999929
YDL218W	12.7806	-0.0330711	0.960777	-0.0344212	0.972541	0.999929
YIL014C-A	1.86386	-0.383427	3.04636	-0.125864	0.89984	0.999929
YIL014W	12.5187	-0.126207	0.970206	-0.130083	0.896501	0.999929
YIL013C	35.1013	-0.183946	0.61612	-0.298554	0.76528	0.999929
YIL011W	5.75978	-0.114952	1.40911	-0.0815781	0.934982	0.999929
YIL010W	12.7733	-0.173649	0.963662	-0.180197	0.856998	0.999929
YIL009C-A	11.7814	-0.0146718	1.01726	-0.0144229	0.988493	0.999929
YIL009W	36.7179	-0.129151	0.601331	-0.214776	0.829942	0.999929
YIL008W	1.76289	-1.51567	2.97023	-0.510288	0.60985	0.999929
YIL007C	13.2765	-0.108881	0.955904	-0.113904	0.909314	0.999929
YIL006W	20.3413	-0.530378	0.80756	-0.656766	0.511331	0.999929
YLR097C	6.37854	0.742203	1.32312	0.560951	0.574831	0.999929
YCL021W-A	6.67847	-0.117142	1.28631	-0.0910682	0.927438	0.999929
YPL214C	16.1878	0.145668	0.875053	0.166468	0.867789	0.999929
YGL075C	5.39694	-0.641717	1.47515	-0.435019	0.663549	0.999929
YGL073W	17.8249	0.301759	0.842103	0.35834	0.720089	0.999929
YGL071W	12.5538	0.26871	0.962754	0.279106	0.780164	0.999929
YGL070C	4.94339	0.86395	1.53421	0.563122	0.573352	0.999929
YGL068W	2.05986	1.80848	2.76298	0.65454	0.512764	0.999929
YGL067W	10.3827	0.742709	1.03878	0.71498	0.474621	0.999929
YGL066W	12.0506	0.218166	0.988416	0.220723	0.825308	0.999929
YGL065C	9.75368	-1.10518	1.11886	-0.987772	0.323265	0.999929
YGL064C	9.58388	2.71235	1.14546	2.3679	0.0178892	0.999929
YHR147C	1.38251	2.52062	2.99174	0.842526	0.399494	0.999929
YHR148W	6.93306	-0.206114	1.25174	-0.164662	0.86921	0.999929
YLL051C	22.3807	0.601387	0.769803	0.781222	0.434672	0.999929
YLL052C	9.63517	-0.224737	1.07967	-0.208154	0.835109	0.999929
YLL053C	9.82388	0.0925605	1.0667	0.0867724	0.930852	0.999929
YLL054C	9.76395	0.251325	1.07979	0.232754	0.815952	0.999929
YJL036W	9.90433	0.0796497	1.07345	0.0742	0.940851	0.999929
YJL037W	14.7673	0.360248	0.906918	0.397222	0.691203	0.999929
YJL034W	7.34854	-0.321525	1.22155	-0.26321	0.792388	0.999929
YJL035C	2.05986	1.80848	2.76298	0.65454	0.512764	0.999929
YJL041W	4.38456	-0.671808	1.72118	-0.390318	0.696302	0.999929
YJL042W	67.5123	-0.603532	0.459559	-1.31329	0.189086	0.999929
YJL038C	2.28663	0.0695082	2.63183	0.0264106	0.97893	0.999929
YJL039C	17.7167	0.134621	0.844336	0.159439	0.873323	0.999929
YDR011W	48.9877	1.04519	0.518858	2.0144	0.0439671	0.999929
YLR263W	6.77945	0.0890455	1.25846	0.0707573	0.943591	0.999929
YJL031C	1.08554	-3.50511	3.13003	-1.11983	0.262785	0.999929
YJL033W	8.04938	-2.21626	1.34392	-1.6491	0.099127	0.999929
YLR266C	25.532	-0.318033	0.730245	-0.435515	0.663188	0.999929
YLR265C	2.72263	0.294085	2.63869	0.111451	0.911259	0.999929
YPR155C	20.429	-0.438735	0.803543	-0.546001	0.585066	0.999929
YOL028C	9.62059	-0.632123	1.10048	-0.574409	0.565691	0.999929
YPL146C	3.21856	-0.0595336	2.15204	-0.0276637	0.97793	0.999929
YMR169C	15.1404	-0.143889	0.902645	-0.159408	0.873347	0.999929
YJR127C	83.0023	-0.474759	0.405208	-1.17164	0.241341	0.999929
YKR041W	67.9959	1.82672	0.4465	4.0912	4.29153e-05	0.0486058
YMR170C	9.38653	-0.385722	1.12258	-0.343604	0.731144	0.999929
YBR238C	8.75157	0.330793	1.13484	0.29149	0.770677	0.999929
YJR019C	18.6632	0.289852	0.825422	0.351156	0.725471	0.999929
YGL098W	0.670062	-2.88605	2.75196	-1.04873	0.294304	0.999929
YGL099W	5.17016	0.135511	1.48805	0.0910665	0.92744	0.999929
YJR021C	14.6941	0.48113	0.910424	0.528468	0.597174	0.999929
YGL103W	4.41965	0.501603	1.67067	0.300241	0.763993	0.999929
YGL104C	11.6745	0.0370556	1.02637	0.0361035	0.9712	0.999929
YGL100W	4.7474	-0.034609	1.62403	-0.0213106	0.982998	0.999929
YGL101W	5.28139	-2.18786	1.68231	-1.30051	0.193427	0.999929
YGL107C	7.01054	1.37107	1.25726	1.09052	0.275483	0.999929
YGL108C	3.06495	0.557579	2.24888	0.247936	0.804184	0.999929
YGL105W	3.03714	-0.515631	2.25945	-0.228211	0.819482	0.999929
YBR237W	8.68137	-0.912408	1.17082	-0.779288	0.43581	0.999929
YPL074W	18.2126	0.077481	0.835181	0.0927716	0.926085	0.999929
YDR057W	13.4126	0.358354	0.937673	0.382174	0.702333	0.999929
YOL029C	6.17526	-0.254508	1.34418	-0.189341	0.849826	0.999929
YOR386W	8.13415	0.138226	1.15193	0.119995	0.904487	0.999929
YOR384W	25.5817	0.0262801	0.71612	0.0366979	0.970726	0.999929
YOR385W	10.4208	0.123383	1.03801	0.118865	0.905382	0.999929
YOR382W	1.60928	-0.060814	2.81545	-0.0216001	0.982767	0.999929
YOR383C	4.38456	-0.671808	1.72118	-0.390318	0.696302	0.999929
YOR381W	15.3569	0.261888	0.892064	0.293576	0.769082	0.999929
YOR381W-A	1.71754	1.59636	2.98936	0.534013	0.593333	0.999929
YOR378W	18.4248	-0.336704	0.841291	-0.400223	0.688993	0.999929
YOR380W	21.2001	-0.425298	0.790671	-0.537895	0.59065	0.999929
YGR250C	21.3186	-0.818433	0.798405	-1.02509	0.305323	0.999929
YGR251W	2.73721	1.44985	2.42716	0.597346	0.550276	0.999929
YGR252W	15.3407	2.32453	0.93483	2.48658	0.0128979	0.999929
YGR253C	6.18983	0.313086	1.33436	0.234634	0.814493	0.999929
YGR246C	7.27538	-0.0528141	1.22258	-0.0431988	0.965543	0.999929
YGR247W	7.52699	1.32809	1.19643	1.11004	0.26698	0.999929
YGR248W	7.98053	0.378981	1.15668	0.327645	0.74318	0.999929
YGR249W	5.37939	0.890212	1.51356	0.588156	0.556428	0.999929
YJR104C	11.0134	-1.32787	1.07644	-1.23358	0.217359	0.999929
YJR103W	47.1313	-0.110136	0.53157	-0.207191	0.835861	0.999929
YJR106W	16.6414	-0.337646	0.874241	-0.386216	0.699337	0.999929
YJR024C	9.29285	-0.34991	1.09765	-0.31878	0.749893	0.999929
YGR254W	20.2258	-0.828767	0.820669	-1.00987	0.312559	0.999929
YGR255C	15.5734	0.628868	0.889794	0.706757	0.479717	0.999929
YJR110W	35.246	0.155517	0.621267	0.250323	0.802337	0.999929
YJR109C	38.8304	-0.105143	0.586384	-0.179307	0.857697	0.999929
YOR287C	1.86386	-0.383427	3.04636	-0.125864	0.89984	0.999929
YDR366C	8.16195	0.510639	1.14616	0.44552	0.655944	0.999929
YOR289W	12.1281	1.0972	0.979372	1.12031	0.262581	0.999929
YOR236W	8.29504	0.107259	1.16729	0.0918869	0.926788	0.999929
YOR063W	3.48772	0.726027	2.02193	0.359077	0.719538	0.999929
YOR284W	6.47519	-1.38262	1.38533	-0.998042	0.318259	0.999929
YOR285W	9.45375	-0.374733	1.1002	-0.340605	0.733401	0.999929
YDR367W	2.70211	-0.277128	2.43763	-0.113688	0.909486	0.999929
YOR212W	24.1157	0.356278	0.734848	0.484831	0.627796	0.999929
YMR271C	6.05971	-1.2715	1.43618	-0.885336	0.375976	0.999929
YOR291W	33.4304	-0.339706	0.654621	-0.518936	0.603806	0.999929
YOR037W	11.755	1.72552	1.00234	1.7215	0.0851608	0.999929
YPL066W	20.4655	1.00476	0.802534	1.25199	0.210575	0.999929
YPL065W	3.37946	-0.139916	2.09815	-0.0666854	0.946832	0.999929
YDL055C	1.1938	0.588577	2.81181	0.209323	0.834196	0.999929
YCL044C	13.1931	-0.996927	1.04237	-0.956403	0.338869	0.999929
YOR177C	11.1772	-0.209432	1.05952	-0.197666	0.843306	0.999929
YMR190C	22.4581	0.185558	0.765695	0.242339	0.808517	0.999929
YOR180C	2.62895	0.425764	2.49423	0.170699	0.86446	0.999929
YPR156C	16.2683	0.13757	0.875972	0.157048	0.875207	0.999929
YOR179C	19.424	0.749807	0.819223	0.915266	0.360052	0.999929
YGR111W	11.6497	0.576068	0.987706	0.583238	0.559733	0.999929
YGR112W	4.71662	1.64404	1.61301	1.01923	0.308092	0.999929
YOL054W	6.78673	0.339291	1.25956	0.269374	0.787642	0.999929
YGR104C	4.00417	0.745399	1.81206	0.411354	0.680813	0.999929
YGR106C	5.30191	-1.54443	1.64154	-0.940845	0.346784	0.999929
YGR108W	8.48241	0.0170111	1.18705	0.0143306	0.988566	0.999929
YGR109C	9.54446	0.796265	1.07487	0.740802	0.458814	0.999929
YGR109W-B	29.6209	-0.466234	0.677476	-0.688192	0.491332	0.999929
YGR109W-A	3.29901	-0.100242	2.10972	-0.0475144	0.962103	0.999929
YGR110W	3.13811	-0.0166102	2.23722	-0.00742448	0.994076	0.999929
YDR319C	6.97841	-1.10714	1.30413	-0.848952	0.395908	0.999929
YDR318W	7.06912	0.659882	1.24435	0.530304	0.595901	0.999929
YDR317W	6.96087	0.259065	1.24574	0.207961	0.83526	0.999929
YIL026C	20.1817	-0.315902	0.816888	-0.386714	0.698968	0.999929
YOR209C	7.23731	0.845367	1.22542	0.689861	0.490282	0.999929
YDR316W	13.8002	0.06119	0.939209	0.0651505	0.948054	0.999929
YDR315C	4.26604	0.93724	1.72618	0.542956	0.58716	0.999929
YDR314C	9.85169	0.406438	1.05616	0.384827	0.700365	0.999929
YIL035C	22.7332	-0.82964	0.783504	-1.05888	0.289653	0.999929
YIL034C	30.9289	-1.29321	0.684421	-1.88949	0.0588259	0.999929
YIL037C	16.896	-0.37161	0.869653	-0.427308	0.669155	0.999929
YIL036W	24.4346	-0.0647882	0.770256	-0.0841125	0.932967	0.999929
YIL030C	31.3136	-0.915901	0.670773	-1.36544	0.172114	0.999929
YIL029C	2.35979	-0.812413	2.6491	-0.306675	0.759091	0.999929
YIL033C	10.3784	-0.56867	1.05706	-0.537975	0.590594	0.999929
YDR320C	6.8248	-0.736813	1.2893	-0.571485	0.567671	0.999929
YNL125C	17.9478	0.641939	0.837644	0.766362	0.443461	0.999929
YML045W-A	1.16599	-3.5793	3.20737	-1.11596	0.264439	0.999929
YML041C	10.2526	-0.0203447	1.05903	-0.0192107	0.984673	0.999929
YML042W	28.8588	-0.171923	0.691014	-0.248799	0.803517	0.999929
YNL121C	9.76097	-0.859499	1.11738	-0.769208	0.44177	0.999929
YNL122C	3.37946	-0.139916	2.09815	-0.0666854	0.946832	0.999929
YML037C	2.50315	2.3983	2.75466	0.870635	0.383954	0.999929
YML038C	4.40508	-0.266998	1.78351	-0.149703	0.880999	0.999929
YML035C	21.8188	0.805966	0.778393	1.03542	0.300472	0.999929
YDR370C	6.84532	-0.465521	1.28869	-0.361236	0.717923	0.999929
YNL118C	7.26809	-0.305756	1.2255	-0.249495	0.802978	0.999929
YNL119W	8.20731	-0.0917407	1.15064	-0.0797299	0.936452	0.999929
YPR048W	5.66609	-0.0506105	1.41675	-0.035723	0.971503	0.999929
YPL088W	11.9248	0.624926	1.02862	0.607541	0.543492	0.999929
YPR046W	1.9516	0.446437	2.7711	0.161104	0.872011	0.999929
YDR371W	16.6311	0.279285	0.864393	0.3231	0.74662	0.999929
YNL305C	7.08667	-0.514291	1.25238	-0.410652	0.681328	0.999929
YMR188C	2.83818	1.82207	2.54149	0.716932	0.473416	0.999929
YPL152W	4.3743	1.5482	1.73577	0.891935	0.372428	0.999929
YPL199C	2.32173	2.07177	2.67388	0.77482	0.438446	0.999929
YOL025W	13.1215	-0.243941	1.0023	-0.24338	0.807711	0.999929
YNL051W	9.83845	0.435512	1.11671	0.389996	0.69654	0.999929
YHR131C	19.6567	-0.670444	0.830602	-0.807178	0.419564	0.999929
YAR031W	11.5868	-0.104611	1.00294	-0.104304	0.916928	0.999929
YDL222C	29.7613	0.233785	0.666455	0.350788	0.725747	0.999929
YPL232W	14.0227	0.350535	0.959914	0.365173	0.714982	0.999929
YPR080W	4.38159	1.9472	1.72473	1.12899	0.258903	0.999929
YOR036W	1.9165	-4.3072	3.39544	-1.26852	0.204611	0.999929
YIL103W	14.3723	-1.15892	0.968422	-1.19671	0.231421	0.999929
YOR313C	4.62888	1.36816	3.57105	0.383125	0.701627	0.999929
YDR499W	4.07733	0.312711	1.7967	0.174047	0.861828	0.999929
YMR076C	20.8518	-0.38343	0.800903	-0.478747	0.632119	0.999929
YMR075W	8.19273	-0.554699	1.18573	-0.467811	0.63992	0.999929
YDR494W	3.88863	-0.453906	1.8994	-0.238974	0.811126	0.999929
YDR493W	4.19288	1.3552	1.75427	0.772511	0.439812	0.999929
YDR492W	9.94834	-0.920348	1.11921	-0.822323	0.410893	0.999929
YDR490C	37.9994	-0.0603596	0.590964	-0.102137	0.918648	0.999929
YDR498C	4.91558	0.265849	1.56081	0.170327	0.864753	0.999929
YDR497C	39.3819	0.56073	0.585093	0.95836	0.337881	0.999929
YDR496C	11.8662	1.03587	0.98672	1.04982	0.293803	0.999929
YDR495C	10.6826	0.22298	1.02639	0.217248	0.828015	0.999929
YFR025C	31.1395	-0.0895991	0.651447	-0.137539	0.890605	0.999929
YFR024C-A	15.389	-0.0515647	0.926913	-0.0556305	0.955636	0.999929
YFR027W	4.2763	-1.8374	1.88564	-0.97442	0.329848	0.999929
YFR026C	12.8713	-0.960931	1.00007	-0.960867	0.336619	0.999929
YFR029W	29.166	-1.2805	0.703626	-1.81986	0.06878	0.999929
YFR028C	5.71145	-1.13816	1.4904	-0.763657	0.445072	0.999929
YFR031C	20.4115	-1.31497	0.843955	-1.5581	0.119209	0.999929
YFR030W	26.167	-0.590264	0.729896	-0.808696	0.41869	0.999929
YFR032C	8.6155	-0.412119	1.13687	-0.362503	0.716976	0.999929
YFR031C-A	4.11972	1.80928	1.80029	1.00499	0.314901	0.999929
YOL004W	24.3147	0.0724377	0.731748	0.0989927	0.921144	0.999929
YMR186W	11.2415	0.808485	1.00397	0.805292	0.420651	0.999929
YMR185W	11.8063	-0.630632	1.00704	-0.626222	0.531169	0.999929
YPL254W	4.25875	0.568753	1.78364	0.318872	0.749823	0.999929
YER053C	18.5198	-0.142843	0.835137	-0.171041	0.864191	0.999929
YER052C	10.6988	-1.05023	1.0897	-0.963778	0.335157	0.999929
YER051W	13.8939	0.0342617	0.93088	0.0368057	0.97064	0.999929
YER050C	1.79799	1.48646	2.80912	0.529156	0.596697	0.999929
YER056C	17.0787	1.12398	0.856552	1.31221	0.189449	0.999929
YER055C	16.5126	0.671343	0.86715	0.774194	0.438816	0.999929
YER054C	23.2526	-0.27737	0.758193	-0.365831	0.714491	0.999929
YBR200W-A	0.335031	-1.94453	2.57535	-0.755054	0.450216	0.999929
YNL036W	5.01359	2.83608	1.63959	1.72975	0.0836745	0.999929
YER057C	6.25571	-0.273346	1.32714	-0.205966	0.836818	0.999929
YER056C-A	0.85877	1.51377	2.5499	0.593657	0.552741	0.999929
YLR007W	6.03622	0.627122	1.34469	0.466369	0.640951	0.999929
YNL199C	9.42594	-0.792627	1.13788	-0.696584	0.486063	0.999929
YPR078C	25.633	-0.257446	0.739468	-0.348151	0.727727	0.999929
YOR043W	15.6115	-1.48502	0.956792	-1.55208	0.120642	0.999929
YMR216C	14.6034	1.11294	0.910647	1.22215	0.221653	0.999929
YAL010C	4.71959	-0.813285	1.63851	-0.496355	0.619644	0.999929
YMR294W	5.58564	-0.028707	1.41641	-0.0202675	0.98383	0.999929
YMR008C	7.53725	0.0993903	1.19811	0.0829558	0.933887	0.999929
YOR197W	12.3972	-0.383325	1.03402	-0.370712	0.710852	0.999929
YBR200W	1.16599	-3.5793	3.20737	-1.11596	0.264439	0.999929
YDR268W	9.13627	1.08849	1.09266	0.996189	0.319159	0.999929
YDR267C	4.15778	0.279328	1.75482	0.159177	0.873529	0.999929
YDR266C	9.18162	0.586037	1.08866	0.538311	0.590362	0.999929
YDR265W	3.60623	-1.54661	2.10863	-0.73347	0.463272	0.999929
YDR264C	19.6829	0.336413	0.812197	0.414201	0.678727	0.999929
YDR263C	10.5919	1.10064	1.03352	1.06494	0.286902	0.999929
YDR262W	7.00325	1.13546	1.23578	0.918821	0.358189	0.999929
YDR261W-A	2.73721	1.44985	2.42716	0.597346	0.550276	0.999929
YDL002C	8.45892	1.14197	1.13375	1.00725	0.313813	0.999929
YOR039W	5.73197	-0.758563	1.42548	-0.532147	0.594624	0.999929
YBR106W	7.7508	2.2966	1.22555	1.87393	0.0609394	0.999929
YBR107C	6.59803	-0.0989931	1.28365	-0.0771185	0.938529	0.999929
YBR104W	15.2721	-0.670343	0.924613	-0.724998	0.468453	0.999929
YBR105C	22.7478	0.366569	0.754528	0.485825	0.627091	0.999929
YBR102C	15.2589	-0.658008	0.915163	-0.719006	0.472137	0.999929
YBR103W	3.21856	-0.0595336	2.15204	-0.0276637	0.97793	0.999929
YBR098W	20.094	-0.405071	0.809795	-0.500215	0.616924	0.999929
YBR101C	4.04952	-0.51511	1.82193	-0.282728	0.777385	0.999929
YBR096W	3.3063	0.415492	2.16312	0.19208	0.847679	0.999929
YBR097W	10.096	-0.923431	1.09959	-0.839795	0.401024	0.999929
YMR029C	7.72595	0.469108	1.18571	0.395636	0.692374	0.999929
YDL241W	2.85572	-1.14259	2.43437	-0.46936	0.638813	0.999929
YBR201C-A	3.66914	0.993337	1.93711	0.512794	0.608096	0.999929
YAR023C	11.894	-0.468117	1.01042	-0.463291	0.643156	0.999929
YPR084W	5.65881	-0.378649	1.41553	-0.267496	0.789088	0.999929
YMR257C	8.61253	0.918665	1.1184	0.821408	0.411414	0.999929
YOR040W	16.9384	0.0455486	0.860789	0.0529149	0.9578	0.999929
YCR044C	4.63914	-0.789017	1.67023	-0.472402	0.63664	0.999929
YDL159W-A	2.91863	1.74405	2.32803	0.749154	0.453764	0.999929
YDL240W	17.4753	0.15737	0.864446	0.182047	0.855546	0.999929
YHR133C	7.10719	-0.273268	1.25642	-0.217498	0.827821	0.999929
YOR193W	6.04648	-1.2417	1.43743	-0.863831	0.387681	0.999929
YPR083W	20.29	-0.148846	0.80902	-0.183983	0.854027	0.999929
YMR262W	10.7105	0.505046	1.02145	0.494441	0.620995	0.999929
YKR022C	2.20618	0.131704	2.6866	0.0490227	0.960901	0.999929
YBL106C	26.0644	-0.00419538	0.720347	-0.00582411	0.995353	0.999929
YOR312C	4.23094	-0.163624	1.74543	-0.0937443	0.925312	0.999929
YHR108W	13.4857	0.224601	0.936984	0.239707	0.810558	0.999929
YBR029C	4.82784	-0.0613419	1.57864	-0.0388573	0.969004	0.999929
YBR030W	8.46189	-0.164558	1.14027	-0.144315	0.885252	0.999929
YBR026C	7.31047	0.602832	1.2109	0.497838	0.618599	0.999929
YBR028C	8.80421	-0.0409696	1.11395	-0.0367786	0.970662	0.999929
YBR034C	25.8581	0.201043	0.710636	0.282906	0.777249	0.999929
YBR035C	12.0344	1.14478	0.99586	1.14953	0.250336	0.999929
YBR031W	4.15778	0.279328	1.75482	0.159177	0.873529	0.999929
YBR033W	31.9983	-0.0388434	0.64213	-0.0604914	0.951764	0.999929
YPR082C	3.52579	-1.51576	2.1227	-0.714071	0.475184	0.999929
YBR036C	12.2423	-0.541066	0.996165	-0.543149	0.587027	0.999929
YBR037C	5.84023	-0.135943	1.38177	-0.0983833	0.921628	0.999929
YDR033W	15.196	0.279474	0.904667	0.308925	0.757379	0.999929
YOL155C	24.5547	-0.0954702	0.742698	-0.128545	0.897718	0.999929
YGR136W	12.6504	-0.770903	0.998316	-0.772204	0.439994	0.999929
YOL156W	9.2475	0.213623	1.08978	0.196024	0.844592	0.999929
YOL157C	10.9137	1.04279	1.04174	1.00101	0.316823	0.999929
YOL151W	5.54029	0.834344	1.41616	0.58916	0.555754	0.999929
YOL152W	40.9415	-0.17686	0.572072	-0.309157	0.757202	0.999929
YGL202W	18.7291	0.102217	0.824946	0.123908	0.901388	0.999929
YDL160C-A	3.9383	1.60679	1.89451	0.84813	0.396366	0.999929
YOL148C	5.64855	1.30697	1.41754	0.921993	0.356532	0.999929
YDL234C	14.6517	0.0417066	0.910652	0.0457986	0.963471	0.999929
YGL198W	6.8877	0.515056	1.24597	0.413377	0.67933	0.999929
YMR237W	21.6447	-0.114895	0.790901	-0.145271	0.884497	0.999929
YGL200C	10.6505	0.641107	1.08645	0.590093	0.555128	0.999929
YPL135W	12.7879	0.103626	0.965902	0.107285	0.914563	0.999929
YGL205W	26.5457	-0.177873	0.710098	-0.250491	0.802208	0.999929
YGR143W	31.1468	-0.0326576	0.652332	-0.0500629	0.960072	0.999929
YKR028W	39.079	0.469353	0.579783	0.809533	0.418209	0.999929
YMR195W	7.47732	0.304387	1.22739	0.247996	0.804138	0.999929
YGL203C	26.9612	-0.209366	0.707093	-0.296094	0.767159	0.999929
YKR027W	28.5748	0.27601	0.689812	0.400123	0.689066	0.999929
YMR044W	17.9229	0.968929	0.853437	1.13533	0.256239	0.999929
YGL204C	0.670062	-2.88605	2.75196	-1.04873	0.294304	0.999929
YMR238W	14.8755	0.552094	0.901876	0.612161	0.540431	0.999929
YKR026C	10.3052	-0.365658	1.05235	-0.347469	0.728239	0.999929
YDR079C-A	0.596901	0.506249	2.39569	0.211316	0.83264	0.999929
YMR222C	3.60623	-1.54661	2.10863	-0.73347	0.463272	0.999929
YKL201C	40.1546	-0.368016	0.603079	-0.610229	0.54171	0.999929
YKL198C	218.417	0.259072	0.2338	1.10809	0.267823	0.999929
YKL197C	41.7241	-0.342208	0.570242	-0.60011	0.548433	0.999929
YKL196C	4.39184	-0.221575	1.71396	-0.129277	0.897139	0.999929
YKL195W	1.34741	-1.06149	2.8974	-0.366359	0.714097	0.999929
YKL194C	14.8477	0.350981	0.910709	0.385392	0.699947	0.999929
YKL193C	5.48467	-0.296157	1.48189	-0.199851	0.841597	0.999929
YJL081C	2.33198	-4.58822	3.29467	-1.39262	0.163735	0.999929
YKL191W	13.2384	0.399885	0.955184	0.418647	0.675474	0.999929
YKR024C	10.4867	-0.228864	1.04236	-0.219564	0.826211	0.999929
YPL125W	17.5074	-0.122442	0.854517	-0.143288	0.886063	0.999929
YDL174C	30.7767	0.511021	0.655277	0.779854	0.435477	0.999929
YIL050W	10.2701	-0.963664	1.08125	-0.89125	0.372795	0.999929
YKR023W	14.6444	-0.0783604	0.91397	-0.0857364	0.931676	0.999929
YBL079W	24.2664	-0.12706	0.746747	-0.170151	0.864891	0.999929
YBL081W	7.39389	-1.20699	1.27957	-0.943277	0.345539	0.999929
YBL080C	15.291	0.485859	0.894346	0.543257	0.586953	0.999929
YBL084C	7.61041	-0.151487	1.19519	-0.126747	0.89914	0.999929
YBL082C	18.2288	-0.637489	0.861892	-0.739639	0.459519	0.999929
YBL085W	13.1815	-0.381092	0.960389	-0.39681	0.691507	0.999929
YIL056W	33.5155	-0.529874	0.641429	-0.826084	0.408757	0.999929
YKR021W	29.0767	0.172581	0.670944	0.257221	0.797008	0.999929
YPR176C	4.64642	-0.349893	1.62878	-0.214819	0.829908	0.999929
YBL076C	6.26299	0.0167725	1.32297	0.0126779	0.989885	0.999929
YBL075C	21.9695	0.309192	0.772647	0.400172	0.689029	0.999929
YPL231W	15.2281	-0.0342369	0.909707	-0.0376351	0.969979	0.999929
YDL003W	6.36397	0.226043	1.30401	0.173345	0.86238	0.999929
YBR175W	10.4837	0.84826	1.03121	0.822584	0.410745	0.999929
YPR161C	9.41568	0.365394	1.0934	0.33418	0.738244	0.999929
YDL178W	20.783	0.370979	0.811606	0.457092	0.647605	0.999929
YPR167C	7.09396	-0.239893	1.25765	-0.190747	0.848724	0.999929
YDR101C	7.97757	1.73612	1.17916	1.47233	0.140931	0.999929
YPL060W	20.3559	-0.337931	0.803539	-0.420553	0.674081	0.999929
YPL174C	4.8732	-1.37876	1.65183	-0.834687	0.403894	0.999929
YOL010W	4.53817	-1.25215	1.7282	-0.724539	0.468735	0.999929
YDL161W	8.4897	0.215604	1.15106	0.187309	0.851419	0.999929
YOL011W	32.1694	0.30634	0.639679	0.478897	0.632012	0.999929
YLR360W	8.23512	0.294482	1.14635	0.256886	0.797267	0.999929
YOL008W	3.22585	0.461886	2.14286	0.215546	0.829341	0.999929
YPL230W	9.24156	2.6841	1.1637	2.30653	0.0210811	0.999929
YOL009C	11.698	-0.984116	1.02855	-0.956799	0.338669	0.999929
YLR096W	10.8187	0.760553	1.02022	0.74548	0.455982	0.999929
YPR168W	10.5598	-0.420286	1.04725	-0.401323	0.688182	0.999929
YOL013W-A	11.461	0.342701	0.995524	0.344242	0.730665	0.999929
YOR316C	26.3848	-0.168268	0.707508	-0.237832	0.812012	0.999929
YPL175W	12.1837	-0.066898	0.980579	-0.068223	0.945608	0.999929
YOL014W	2.46805	0.545763	2.55568	0.213549	0.830899	0.999929
YKL117W	5.95577	0.650057	1.34854	0.482045	0.629774	0.999929
YKL116C	6.70628	0.358426	1.26101	0.284237	0.776228	0.999929
YKL114C	14.0608	-0.125145	0.963658	-0.129864	0.896674	0.999929
YKL124W	17.3611	0.0944468	0.858816	0.109973	0.912431	0.999929
YKL122C	2.80308	0.237393	2.39138	0.0992705	0.920924	0.999929
YKL121W	19.0363	-0.110572	0.821785	-0.134551	0.892967	0.999929
YKL120W	7.14229	0.414887	1.24607	0.332957	0.739167	0.999929
YDL159W	20.1086	0.81673	0.797522	1.02408	0.305795	0.999929
YOL013C	12.5948	0.486728	1.0224	0.476064	0.634029	0.999929
YKL113C	5.91339	-0.476508	1.38937	-0.342968	0.731623	0.999929
YKL112W	10.7485	-0.113438	1.02922	-0.110218	0.912237	0.999929
YPR070W	4.71662	1.64404	1.61301	1.01923	0.308092	0.999929
YPR071W	6.54539	0.397822	1.2969	0.306749	0.759035	0.999929
YPL063W	9.21969	-0.135712	1.09523	-0.123912	0.901385	0.999929
YPL172C	3.88566	2.45734	2.04447	1.20195	0.229384	0.999929
YOL115W	20.5754	-0.648172	0.80556	-0.804623	0.421037	0.999929
YPR134W	3.44237	2.10459	2.09291	1.00558	0.314617	0.999929
YPL022W	13.2209	0.971985	0.943276	1.03044	0.302806	0.999929
YHR129C	5.35887	0.656353	1.44704	0.453583	0.650129	0.999929
YLR375W	22.3164	-1.01014	0.795495	-1.26983	0.204147	0.999929
YLR371W	21.0713	0.392274	0.791789	0.495427	0.620298	0.999929
YLR372W	5.84455	2.05685	1.41805	1.45048	0.146925	0.999929
YKR084C	11.4404	0.220715	1.01125	0.21826	0.827227	0.999929
YKR085C	10.2364	1.08541	1.06094	1.02306	0.306279	0.999929
YLR376C	9.78744	-0.896679	1.16597	-0.769039	0.44187	0.999929
YLR377C	25.8025	-0.0486404	0.724317	-0.0671534	0.94646	0.999929
YKR080W	9.33523	0.379679	1.08566	0.349723	0.726547	0.999929
YPR139C	2.70211	-0.277128	2.43763	-0.113688	0.909486	0.999929
YKR082W	21.5394	0.198297	0.773405	0.256395	0.797646	0.999929
YKR083C	3.9032	0.447935	1.86822	0.239765	0.810512	0.999929
YKR076W	24.2899	-0.599001	0.744803	-0.804241	0.421258	0.999929
YKR077W	14.3928	-0.998353	0.949126	-1.05187	0.292861	0.999929
YKR078W	18.1994	0.0899125	0.862977	0.104189	0.91702	0.999929
YKR079C	13.7271	0.195516	0.943537	0.207216	0.835841	0.999929
YIL017C	38.646	0.168762	0.587898	0.28706	0.774066	0.999929
YIL018W	0.750511	-2.95272	2.80759	-1.05169	0.292941	0.999929
YIL019W	8.74859	-0.902506	1.17414	-0.768655	0.442098	0.999929
YIL020C	7.27538	-0.0528141	1.22258	-0.0431988	0.965543	0.999929
YIL021W	12.3227	-0.550476	0.989194	-0.55649	0.577876	0.999929
YIL022W	6.14745	-0.884315	1.3744	-0.643418	0.519953	0.999929
YIL023C	17.2734	0.00168459	0.854199	0.00197212	0.998426	0.999929
YIL024C	5.16288	-0.205589	1.5133	-0.135855	0.891936	0.999929
YMR296C	4.53088	-1.94136	1.82606	-1.06314	0.287718	0.999929
YIL015W	23.8962	-0.319655	0.757969	-0.421727	0.673225	0.999929
YIL016W	5.21552	-0.984752	1.54214	-0.638562	0.523108	0.999929
YGL056C	19.8907	-0.797136	0.824787	-0.966475	0.333806	0.999929
YGL057C	7.00325	1.13546	1.23578	0.918821	0.358189	0.999929
YGL058W	5.67338	0.255689	1.46144	0.174957	0.861113	0.999929
YGL059W	16.7642	0.0750276	0.874532	0.0857917	0.931632	0.999929
YGL060W	10.4559	0.573836	1.03247	0.555788	0.578356	0.999929
YGL061C	6.93306	-0.206114	1.25174	-0.164662	0.86921	0.999929
YGL062W	53.2232	0.486503	0.512977	0.948391	0.34293	0.999929
YGL063W	104.452	0.407572	0.349407	1.16647	0.243425	0.999929
YHR138C	7.70409	-0.19847	1.21164	-0.163803	0.869887	0.999929
YHR137W	12.2188	0.333966	0.973664	0.343	0.731599	0.999929
YJL049W	1.87115	0.524266	2.77331	0.18904	0.850062	0.999929
YJL048C	15.1126	-0.376774	0.91338	-0.412505	0.679969	0.999929
YJL047C-A	3.66914	0.993337	1.93711	0.512794	0.608096	0.999929
YJL047C	11.3805	0.354271	1.00247	0.353398	0.72379	0.999929
YGL054C	7.03106	1.5348	1.26417	1.21407	0.224721	0.999929
[truncated: 5,184 more rows]

## Sheet: 1744
gene	baseMean	log2FoldChange	lfcSE	stat	pvalue	padj
[truncated: 1,810 more rows]

[truncated: 2 more sheets: 1747, 1751]
