# Supplementary material for: Copy number variation alters local and global mutational tolerance
Source: HighWire-hosted journal article supplement (doi:10.1101/gr.277625.122), 2023-08-01
Supplement: Supplemental_Tables.zip [file Supplemental_Table_S26.xlsx]

## Sheet: DGY1728
#DESeq2 results from Observed versus Expected values. Results from differential analysis of expected counts per gene Supplemental_Table_S24) from RNA-seq for each CNV strain compared to observed abundances (Supplemental_Table_S21).
gene	baseMean	log2FoldChange	lfcSE	stat	pvalue	padj
YAL068C	2.07038	2.12028	2.79434	0.758775	0.447987	0.724062
YAL061W	61.6466	-1.28414	0.357443	-3.59257	0.000327434	0.0094377
YAR071W	179.084	-1.5527	0.391487	-3.96617	7.30382e-05	0.00338886
YDR058C	21.2896	-0.254667	0.441347	-0.577022	0.563925	0.808308
YDR059C	43.6882	-0.468072	0.400934	-1.16745	0.243027	0.546046
YDR060W	230.054	0.602652	0.329267	1.83028	0.0672074	0.28161
YDR061W	75.1317	-0.1454	0.315032	-0.461542	0.64441	0.85067
YDR062W	170.059	-0.375169	0.290369	-1.29204	0.196343	0.494496
YDR063W	205.719	-0.52841	0.302859	-1.74474	0.0810298	0.310777
YDR064W	1311.87	-0.524623	0.267922	-1.95812	0.0502163	0.239019
YDR065W	10.6694	-1.20228	0.665017	-1.80789	0.0706242	0.290593
YBL113C	476.174	2.90301	0.878021	3.30631	0.000945349	0.0193373
YDR066C	7.16373	-1.28554	0.741303	-1.73417	0.0828886	0.314943
YDR067C	49.8793	-0.00879278	0.348923	-0.0251998	0.979896	0.992592
YDR068W	78.3798	0.310302	0.356569	0.870242	0.384168	0.674807
YDR069C	31.806	-0.58379	0.400008	-1.45945	0.144442	0.418596
YDR070C	171.768	-2.0695	0.880743	-2.34972	0.0187877	0.13852
YDR071C	283.425	-0.487514	0.303402	-1.60682	0.108093	0.36337
YDR072C	123.482	0.170735	0.280125	0.609497	0.542195	0.795043
YDR073W	99.4827	1.01406	0.330234	3.07074	0.00213531	0.0323242
YDR074W	330.318	-0.896587	0.318569	-2.81442	0.00488657	0.054897
YDR075W	41.9678	0.431666	0.395335	1.0919	0.274878	0.575679
YBL112C	31.9501	1.58047	0.472556	3.34451	0.000824292	0.0177518
YDR076W	9.38682	-0.101866	0.615828	-0.165413	0.868619	0.953236
YDR077W	11899.7	0.760643	0.879204	0.86515	0.386957	0.676789
YDR078C	32.5988	-0.245172	0.45089	-0.543752	0.586612	0.818332
YDR079W	31.6545	-0.251422	0.46024	-0.546284	0.584871	0.816501
YDR079C-A	18.7819	-0.522856	0.482108	-1.08452	0.278133	0.578997
YDR080W	37.6002	0.209901	0.368961	0.568897	0.569426	0.811009
YDR081C	63.6802	-0.11911	0.321868	-0.370058	0.711339	0.882524
YDR082W	21.8527	0.156549	0.445311	0.35155	0.725176	0.888113
YDR083W	79.7145	0.124001	0.41143	0.301389	0.763118	0.905053
YDR084C	71.7141	-0.517713	0.360203	-1.43728	0.150639	0.428948
YBL111C	37.8164	1.35726	0.495019	2.74182	0.0061099	0.0644747
YDR085C	36.5899	-1.24574	0.405393	-3.07293	0.00211971	0.0321734
YDR086C	273.846	0.108714	0.268054	0.405567	0.685061	0.869301
YDR087C	154.735	0.938856	0.326845	2.87248	0.00407261	0.0493469
YDR088C	50.7124	0.369531	0.39139	0.944151	0.345092	0.641303
YDR089W	42.5767	-1.30143	0.406518	-3.20142	0.00136752	0.0242831
YDR090C	32.5334	0.00703204	0.393119	0.0178878	0.985728	0.994793
YDR091C	142.898	-0.367372	0.291724	-1.25931	0.207918	0.507739
YDR092W	136.458	-0.0815226	0.287482	-0.283574	0.776737	0.911371
YDR093W	168.687	0.536752	0.312502	1.71759	0.0858709	0.321776
YBL108C-A	1.07524	0.000992519	1.73969	0.000570514	0.999545	0.999586
YDR096W	82.906	-0.14348	0.32562	-0.440635	0.659477	0.858102
YDR097C	63.4061	0.321541	0.356543	0.90183	0.367147	0.66088
YDR098C	155.33	0.243922	0.283017	0.861864	0.388762	0.678284
YDR098C-B	570.998	1.43554	0.396008	3.62503	0.000288925	0.00870558
YDR098C-A	248.843	1.46831	0.443629	3.30978	0.000933708	0.0192371
YDR099W	706.325	-0.149884	0.264738	-0.56616	0.571285	0.8115
YDR100W	47.8327	-0.71417	0.435826	-1.63866	0.101284	0.352456
YDR101C	102.948	0.390711	0.313565	1.24603	0.212755	0.513617
YDR103W	53.7199	-0.436306	0.346734	-1.25833	0.208272	0.507787
YDR104C	30.7056	0.539471	0.404446	1.33385	0.182253	0.476638
YDR105C	72.5009	-0.522439	0.33142	-1.57637	0.114941	0.373392
YDR106W	2.33044	-0.113154	1.16863	-0.0968259	0.922865	0.975242
YDR107C	32.1483	-0.849494	0.430859	-1.97163	0.0486519	0.233718
YDR108W	44.2488	0.258556	0.389871	0.663183	0.507214	0.771423
YDR109C	25.6361	0.360383	0.422907	0.852157	0.394127	0.681395
YDR110W	48.4735	0.575236	0.348908	1.64867	0.0992145	0.347373
YDR111C	50.7895	0.273555	0.359093	0.761794	0.446183	0.722784
YDR113C	91.105	0.501159	0.30124	1.66365	0.0961819	0.342394
YBL107C	65.7111	0.374131	0.33931	1.10262	0.270191	0.571527
YDR115W	124.945	-0.0574833	0.303326	-0.18951	0.849693	0.943975
YDR116C	159.123	0.573738	0.290826	1.97279	0.0485195	0.233718
YDR117C	76.9359	-0.599845	0.333034	-1.80115	0.0716794	0.291779
YDR118W	23.5339	-0.0634162	0.459064	-0.138142	0.890128	0.963319
YDR119W	139.167	-0.0189349	0.291466	-0.0649643	0.948202	0.982656
YDR119W-A	89.7601	-0.526365	0.423074	-1.24414	0.213447	0.514635
YDR120C	151.827	0.914359	0.322018	2.83947	0.00451889	0.0528715
YDR121W	87.9316	0.637736	0.31454	2.02752	0.0426096	0.218681
YDR122W	130.226	-0.0619223	0.28653	-0.216111	0.828901	0.93436
YBL106C	34.4074	0.592271	0.414943	1.42735	0.153478	0.433741
YDR123C	60.4153	1.39671	0.359088	3.88961	0.000100406	0.00422267
YDR124W	4.01475	-0.114405	0.913197	-0.125279	0.900302	0.968769
YDR125C	17.5019	-0.325102	0.509576	-0.637985	0.523483	0.781664
YDR126W	32.5396	0.275819	0.389052	0.708953	0.478354	0.747731
YDR127W	143.638	-0.0769579	0.277972	-0.276855	0.781892	0.913582
YDR128W	66.75	0.343661	0.368813	0.931803	0.351438	0.648523
YDR129C	303.154	-0.295261	0.256307	-1.15198	0.249329	0.551733
YDR130C	45.858	-0.0729458	0.346507	-0.210518	0.833264	0.935189
YDR131C	19.4669	-0.536181	0.463744	-1.1562	0.247599	0.550038
YDR132C	18.1059	-0.211742	0.485583	-0.436057	0.662796	0.859481
YBL105C	140.293	-0.0308908	0.303147	-0.1019	0.918836	0.973055
YDR134C	1262.23	-0.205573	0.364384	-0.564165	0.572642	0.81187
YDR135C	124.894	-0.0426484	0.292531	-0.145791	0.884086	0.961318
YDR137W	35.8776	-0.140586	0.407302	-0.345164	0.729971	0.889918
YDR138W	51.6761	-0.377449	0.352313	-1.07134	0.284015	0.58473
YDR139C	143.533	0.18109	0.276931	0.653919	0.513164	0.774679
YDR140W	27.6925	-0.671426	0.435507	-1.54171	0.123144	0.389353
YDR141C	76.7161	-0.570165	0.324295	-1.75817	0.078719	0.305404
YDR142C	32.7032	-0.19058	0.387778	-0.491467	0.623096	0.839298
YDR143C	136.237	0.558769	0.331128	1.68747	0.0915126	0.334141
YDR144C	94.1212	0.316494	0.320991	0.985989	0.324139	0.624904
YBL104C	37.9597	-0.0711109	0.372093	-0.19111	0.848439	0.943679
YDR145W	133.674	0.320167	0.30772	1.04045	0.298132	0.598465
YDR146C	102.266	0.171983	0.299919	0.57343	0.566353	0.80895
YDR147W	51.494	-0.286158	0.344413	-0.830855	0.406055	0.693059
YDR148C	435.029	-0.528366	0.27461	-1.92406	0.0543468	0.250531
YDR150W	328.92	0.290309	0.305431	0.95049	0.341863	0.63852
YDR151C	55.4508	0.146311	0.354223	0.413049	0.679571	0.866962
YDR152W	259.75	0.65574	0.279629	2.34504	0.0190253	0.139696
YDR153C	136.481	0.410787	0.284187	1.44548	0.148323	0.425152
YDR155C	1715.82	-0.289938	0.330192	-0.87809	0.379895	0.673797
YDR156W	62.6308	0.187555	0.326932	0.573682	0.566183	0.80895
YAL060W	194.019	0.103691	0.325084	0.318967	0.749751	0.899944
YBL103C	82.588	0.507938	0.317211	1.60126	0.109319	0.364178
YDR158W	657.876	-0.162	0.286431	-0.56558	0.571679	0.811585
YDR159W	75.6208	-0.170069	0.315878	-0.538402	0.590299	0.820068
YDR160W	43.661	-0.489078	0.361058	-1.35457	0.175555	0.466972
YDR161W	48.6418	-0.0263652	0.390389	-0.0675359	0.946155	0.981728
YDR162C	83.2123	0.597368	0.3114	1.91833	0.0550695	0.252232
YDR163W	44.3244	0.468271	0.38817	1.20636	0.22768	0.529274
YDR164C	84.6313	-0.21781	0.316196	-0.688844	0.490922	0.756445
YDR165W	65.3109	-0.375818	0.340262	-1.10449	0.269379	0.57073
YDR166C	34.3683	-0.923247	0.396198	-2.33027	0.019792	0.142979
YDR167W	129.664	0.646597	0.281039	2.30073	0.0214067	0.147663
YBL102W	56.8678	-0.959138	0.38249	-2.50761	0.0121549	0.102313
YDR168W	142.253	-0.356488	0.363487	-0.980745	0.326719	0.626785
YDR169C	123.467	0.559983	0.364431	1.53659	0.124393	0.39135
YDR170C	223.741	0.342536	0.307169	1.11514	0.264791	0.566694
YDR170W-A	38.9431	0.172843	0.41335	0.418152	0.675836	0.865573
YDR171W	227.895	-0.289412	0.330662	-0.875249	0.381438	0.67438
YDR172W	275.768	0.532768	0.305555	1.74361	0.0812277	0.311328
YDR173C	31.3923	1.10525	0.401743	2.75113	0.00593896	0.0635535
YDR174W	537.221	0.292611	0.290643	1.00677	0.314044	0.616106
YBL101C	60.7888	0.0831131	0.354145	0.234686	0.814452	0.927575
YDR175C	116.357	0.547447	0.304138	1.8	0.0718612	0.291895
YDR176W	78.9251	0.117559	0.350595	0.335313	0.737389	0.894617
YDR177W	244.267	0.456409	0.292283	1.56153	0.118399	0.380034
YDR178W	187.74	-0.462805	0.302836	-1.52824	0.126453	0.394355
YDR179C	12.9619	0.203967	0.591543	0.344805	0.730241	0.889918
YDR179W-A	10.4201	-0.831046	0.61357	-1.35444	0.175595	0.466972
YDR180W	19.8488	-0.741883	0.490369	-1.51291	0.130303	0.398735
YDR181C	35.5609	0.356584	0.410951	0.867706	0.385555	0.675528
YDR182W	156.875	-0.602258	0.291912	-2.06315	0.0390988	0.207762
YDR182W-A	1.78403	-0.702241	1.3988	-0.502032	0.615645	0.835445
YDR183W	33.4469	-0.158608	0.441004	-0.359653	0.719106	0.885615
YDR184C	61.4123	0.389046	0.322238	1.20732	0.227307	0.528624
YDR185C	27.637	0.384153	0.439803	0.873466	0.382409	0.67438
YDR186C	250.882	0.346609	0.291789	1.18788	0.234882	0.536952
YDR188W	306.189	1.01576	0.371963	2.73081	0.00631796	0.0655983
YDR189W	100.814	-0.509924	0.325511	-1.56654	0.117223	0.378045
YDR190C	340.638	0.61329	0.282154	2.1736	0.0297355	0.178444
YDR191W	10.7385	-0.26989	0.625137	-0.431729	0.665938	0.860042
YDR192C	51.532	0.627374	0.400988	1.56457	0.117683	0.37859
YDR194C	185.152	0.124211	0.295779	0.419944	0.674526	0.865111
YBL100W-B	44.5457	-0.16659	0.379722	-0.438717	0.660866	0.858735
YDR195W	25.3122	-0.332948	0.438209	-0.759793	0.447379	0.723425
YDR196C	140.058	0.562025	0.311608	1.80363	0.0712896	0.291231
YDR197W	26.3332	-0.735925	0.496093	-1.48344	0.137957	0.40815
YDR198C	38.383	0.0416018	0.377997	0.110059	0.912363	0.972523
YDR200C	83.9509	0.334827	0.303296	1.10396	0.269609	0.57077
YDR201W	70.1815	0.574146	0.368834	1.55665	0.119553	0.38202
YDR202C	44.8941	-0.681193	0.360182	-1.89125	0.0585911	0.262053
YDR204W	130.36	-0.337714	0.327204	-1.03212	0.302016	0.604137
YDR205W	49.6558	-0.323081	0.355989	-0.907558	0.364112	0.658773
YBL100W-A	2.67373	-0.751422	1.11952	-0.671201	0.502092	0.767186
YDR206W	82.114	0.160818	0.305853	0.525802	0.599026	0.824844
YDR207C	89.5416	0.68492	0.317046	2.16032	0.0307481	0.181517
YDR208W	95.6055	-0.326358	0.296432	-1.10096	0.270916	0.572424
YDR210W	85.3342	0.956242	0.35826	2.66913	0.00760489	0.07419
YDR210W-B	33.5649	-0.46053	0.395435	-1.16462	0.244174	0.546377
YDR210W-A	10.8362	-1.19659	0.622487	-1.92228	0.0545711	0.250957
YDR210C-D	557.001	1.08378	0.370425	2.92578	0.00343589	0.0448199
YDR210C-C	166.927	1.37035	0.378475	3.62071	0.000293794	0.00870558
YDR211W	133.224	-0.0395449	0.316036	-0.125128	0.900422	0.968769
YDR212W	213.254	0.260502	0.263592	0.988278	0.323017	0.624362
YDR213W	39.7491	0.456135	0.397016	1.14891	0.250593	0.552816
YDR214W	180.136	0.0305222	0.333325	0.091569	0.927041	0.977037
YDR216W	97.4069	-0.995241	0.342339	-2.90718	0.00364706	0.0464593
YDR217C	41.4526	0.0837168	0.395987	0.211413	0.832565	0.934928
YDR218C	1.21241	0.991708	1.66109	0.597022	0.550493	0.800484
YDR219C	33.5787	-0.145807	0.430195	-0.338932	0.734661	0.893133
YDR221W	47.5241	0.025513	0.355282	0.0718104	0.942753	0.979948
YDR222W	4.26638	-0.725113	1.01187	-0.716606	0.473617	0.742057
YDR223W	4.69319	-0.828342	0.867762	-0.954572	0.339794	0.637573
YBL099W	1264.03	0.175179	0.306032	0.572422	0.567036	0.80895
YDR224C	744.94	0.468725	0.272242	1.72172	0.0851194	0.320011
YDR225W	598.659	-0.122476	0.270082	-0.453476	0.650206	0.852549
YDR226W	444.44	0.143296	0.266465	0.537766	0.590738	0.820181
YDR227W	37.7148	-0.12308	0.445829	-0.276071	0.782494	0.913603
YDR228C	49.5143	0.390412	0.367109	1.06347	0.287567	0.588537
YDR229W	69.6122	0.461563	0.353826	1.30449	0.192065	0.489994
YDR231C	60.8051	0.163493	0.339099	0.48214	0.629707	0.842808
YDR232W	225.074	0.786525	0.358648	2.19303	0.0283056	0.173886
YDR233C	550.279	0.0159167	0.294312	0.0540812	0.95687	0.986249
YDR234W	99.5675	0.888433	0.338976	2.62093	0.00876891	0.0817716
YBL098W	43.1751	-0.0266715	0.364453	-0.0731823	0.941661	0.979588
YDR235W	29.3114	-0.870036	0.467643	-1.86047	0.0628192	0.273462
YDR236C	34.6802	-0.706882	0.405934	-1.74137	0.0816183	0.312195
YDR237W	79.7205	0.028507	0.334178	0.0853048	0.932019	0.977918
YDR238C	260.728	-0.0756681	0.311828	-0.24266	0.808269	0.924643
YDR239C	38.8581	0.0894494	0.391232	0.228635	0.819152	0.929694
YDR240C	40.9532	0.0117581	0.378459	0.0310683	0.975215	0.991804
YDR242W	11.7035	0.00324915	0.556714	0.0058363	0.995343	0.998562
YDR243C	27.8059	0.412266	0.411529	1.00179	0.316445	0.618138
YDR244W	52.7747	0.561653	0.360914	1.5562	0.119662	0.382154
YBL097W	19.8641	0.427482	0.465872	0.917595	0.358831	0.655113
YDR245W	174.948	0.0939058	0.302446	0.310488	0.75619	0.901989
YDR246W	129.277	0.444843	0.291497	1.52607	0.126993	0.394959
YDR246W-A	4.4494	1.63067	0.94636	1.7231	0.0848705	0.319767
YDR247W	31.2441	-0.641266	0.413185	-1.552	0.120661	0.384056
YDR248C	37.7501	-0.226112	0.386522	-0.584991	0.558554	0.804914
YDR249C	15.5906	-0.51953	0.50901	-1.02067	0.307413	0.608957
YDR251W	125.681	-0.369013	0.330797	-1.11553	0.264625	0.566684
YDR252W	10.8809	-0.0654608	0.572733	-0.114296	0.909003	0.97151
YDR253C	10.5672	-0.85403	0.64972	-1.31446	0.188692	0.484857
YDR254W	13.4266	-0.998483	0.557937	-1.7896	0.0735185	0.292996
YAL059W	57.9156	0.616442	0.350938	1.75655	0.0789938	0.306054
YBL095W	24.5468	0.492857	0.472648	1.04276	0.297061	0.59726
YDR255C	36.7464	-0.125809	0.395323	-0.318244	0.7503	0.899944
YDR256C	6.04562	0.622257	0.812295	0.766049	0.443647	0.721132
YDR257C	32.8374	-0.177951	0.476094	-0.373774	0.708573	0.880752
YDR258C	120.294	-0.60033	0.333434	-1.80045	0.0717901	0.291813
YDR259C	15.4997	-0.775198	0.50782	-1.52652	0.12688	0.394839
YDR260C	88.7574	0.578794	0.317416	1.82346	0.068234	0.283426
YDR261C	111.974	0.24225	0.305434	0.793135	0.427699	0.710014
YDR261W-B	59.5023	0.0997746	0.362581	0.275179	0.783179	0.913978
YDR261W-A	5.09222	-0.653003	0.827172	-0.78944	0.429855	0.711686
YBL093C	117.324	0.577962	0.299417	1.93029	0.0535705	0.248911
YDR261C-D	366.769	-0.116155	0.277176	-0.419068	0.675167	0.865111
YDR261C-C	65.9258	1.44094	0.462394	3.11625	0.00183167	0.0293633
YDR262W	72.2015	-0.980296	0.36058	-2.71866	0.0065546	0.0671582
YDR263C	4.82529	0.20344	0.813061	0.250215	0.802421	0.922526
YDR264C	172.222	0.229338	0.322718	0.710644	0.477305	0.746295
YDR265W	29.6313	0.0651084	0.411264	0.158313	0.87421	0.955404
YDR266C	56.7485	-0.226302	0.328609	-0.688667	0.491033	0.756445
YDR267C	96.7839	0.810815	0.325681	2.4896	0.0127888	0.106083
YDR268W	23.2044	-0.384156	0.501771	-0.765602	0.443913	0.721359
YBL092W	4277.64	0.52859	0.299366	1.7657	0.0774459	0.302433
YDR270W	58.4275	0.803452	0.437885	1.83485	0.0665281	0.280826
YDR272W	76.4533	-0.786158	0.396	-1.98525	0.047117	0.230023
YDR273W	12.533	1.02683	0.589221	1.74269	0.081387	0.311729
YDR275W	75.5606	-0.40557	0.351697	-1.15318	0.248836	0.551553
YDR276C	483.127	-0.143223	0.291994	-0.490501	0.62378	0.839302
YDR277C	256.418	-0.00703806	0.285212	-0.0246766	0.980313	0.992678
YDR279W	24.3706	-0.724814	0.445453	-1.62714	0.103707	0.355898
YDR280W	70.4623	0.19103	0.355574	0.537244	0.591099	0.820181
YDR281C	143.939	0.266763	0.335934	0.794094	0.427141	0.709869
YBL091C-A	58.9146	0.0832978	0.351465	0.237002	0.812656	0.927432
YDR282C	21.6689	-0.168595	0.490058	-0.344031	0.730823	0.890247
YDR283C	66.1118	-0.0256481	0.318135	-0.0806202	0.935744	0.978226
YDR284C	93.1507	-0.824536	0.3139	-2.62675	0.00862048	0.0809347
YDR285W	14.8128	-0.019682	0.59313	-0.0331833	0.973528	0.991804
YDR286C	20.8884	0.182285	0.451684	0.403568	0.68653	0.869857
YDR287W	38.9486	-0.145052	0.37669	-0.385071	0.700185	0.876114
YDR288W	43.1594	-0.241292	0.402103	-0.600074	0.548457	0.799297
YDR289C	55.7641	0.325202	0.341318	0.952781	0.340701	0.637573
YDR291W	38.4147	-0.57311	0.403372	-1.4208	0.155375	0.436128
YDR292C	77.9137	-0.554109	0.325359	-1.70307	0.0885549	0.328972
YBL091C	386.598	-0.113018	0.252137	-0.448241	0.653979	0.855618
YDR293C	185.623	-0.130103	0.276556	-0.47044	0.638041	0.847011
YDR294C	166.434	-0.0727841	0.294081	-0.247497	0.804524	0.923083
YDR295C	27.9286	0.197473	0.47402	0.416592	0.676977	0.866063
YDR296W	124.904	1.13625	0.290594	3.91007	9.22677e-05	0.00397065
YDR297W	194.594	-0.299482	0.303542	-0.986624	0.323827	0.624904
YDR298C	283.288	-0.462334	0.329348	-1.40379	0.160383	0.444107
YDR299W	93.5974	0.298811	0.331007	0.902733	0.366668	0.660621
YDR300C	101.543	0.18236	0.327807	0.556302	0.578005	0.813577
YDR301W	53.7902	-0.297218	0.364804	-0.814734	0.415225	0.699675
YDR302W	31.1965	-0.333511	0.391564	-0.85174	0.394358	0.681588
YBL090W	79.4118	-0.0758778	0.346293	-0.219114	0.826561	0.933564
YDR303C	41.1816	-0.546905	0.384512	-1.42233	0.154929	0.435772
YDR304C	526.653	-0.284019	0.269058	-1.05561	0.291148	0.592786
YDR305C	36.3537	0.184334	0.404611	0.455584	0.648689	0.851852
YDR306C	41.2002	-0.250192	0.356365	-0.702066	0.482638	0.750522
YDR307W	47.2923	-1.1137	0.393127	-2.83293	0.00461236	0.0536718
YDR308C	125.424	0.491039	0.293844	1.67109	0.0947046	0.339924
YDR309C	237.326	-0.0604049	0.292268	-0.206676	0.836263	0.935794
YDR310C	146.473	0.568537	0.285482	1.9915	0.0464263	0.22782
YDR311W	53.0793	-0.106492	0.417985	-0.254776	0.798896	0.920614
YBL089W	30.709	-0.636776	0.406982	-1.56463	0.11767	0.37859
YDR312W	80.2955	0.531379	0.356006	1.49261	0.135539	0.405196
YDR313C	53.5716	0.574971	0.340598	1.68812	0.0913882	0.334114
YDR314C	14.0323	-0.316527	0.531985	-0.594993	0.551848	0.800959
YDR315C	16.4483	-0.341889	0.509963	-0.670418	0.502591	0.767743
YDR316W	57.6784	0.0195914	0.481992	0.0406468	0.967578	0.9895
YDR316W-B	38.6175	0.671402	0.415396	1.61629	0.106031	0.359548
YDR317W	2.2779	-1.71023	1.29842	-1.31716	0.187784	0.484533
YDR318W	38.3781	-0.152913	0.391876	-0.390208	0.696383	0.874046
YBL088C	42.1332	-0.069217	0.363779	-0.190272	0.849096	0.943679
YDR319C	20.5852	-0.621106	0.480846	-1.2917	0.196463	0.49458
YDR320C	61.4432	-0.0165081	0.3487	-0.0473419	0.962241	0.987859
YDR320C-A	49.6069	-0.357368	0.355936	-1.00402	0.315368	0.616986
YDR321W	106.981	-0.0926773	0.288522	-0.321214	0.748048	0.899045
YDR322W	62.7376	-0.48508	0.388222	-1.24949	0.211486	0.511224
YDR322C-A	356.016	0.776429	0.2848	2.72623	0.00640627	0.0663531
YDR323C	32.9162	0.428634	0.42847	1.00038	0.317125	0.618138
YDR324C	114.672	0.387164	0.326226	1.1868	0.235308	0.53716
YDR325W	46.042	-0.0199962	0.383815	-0.0520986	0.95845	0.986806
YDR326C	75.5907	0.102857	0.323495	0.317956	0.750519	0.899944
YBL087C	592	0.266781	0.304874	0.875054	0.381545	0.67438
YDR328C	435.151	0.510709	0.270489	1.88809	0.0590134	0.263047
YDR329C	107.928	0.342366	0.293555	1.16628	0.243502	0.546377
YDR330W	125.268	0.193872	0.298872	0.648681	0.516545	0.776503
YDR331W	45.5027	-0.498231	0.353567	-1.40916	0.158789	0.441807
YDR332W	15.8964	-0.170359	0.534195	-0.318908	0.749796	0.899944
YDR333C	63.3271	-0.117878	0.383385	-0.307467	0.758488	0.902587
YDR334W	92.1227	0.415513	0.32849	1.26492	0.205901	0.506239
YDR335W	124.492	-0.324096	0.353457	-0.916933	0.359178	0.65512
YDR336W	20.0602	-0.53155	0.45913	-1.15773	0.246973	0.549239
YDR337W	66.8765	0.159545	0.364557	0.43764	0.661648	0.859459
YBL086C	109.268	0.918253	0.307149	2.9896	0.00279339	0.0397553
YDR338C	52.5199	0.373039	0.354702	1.0517	0.292939	0.593679
YDR339C	100.97	0.373238	0.308605	1.20944	0.226495	0.527666
YDR341C	284.413	-0.0622505	0.278043	-0.223888	0.822844	0.931002
YDR342C	1518.18	-0.416617	0.286362	-1.45486	0.145707	0.420385
YDR343C	1470.19	-0.354968	0.300409	-1.18162	0.237358	0.539251
YDR345C	62.2527	0.666858	0.445856	1.49568	0.134736	0.404493
YDR346C	378.038	0.41294	0.288368	1.43199	0.152147	0.431068
YDR347W	107.439	-0.267511	0.309073	-0.865527	0.38675	0.676634
YDR348C	162.767	0.473721	0.2804	1.68944	0.0911343	0.333991
YAL058W	46.0265	-0.180906	0.361349	-0.500642	0.616623	0.836281
YBL085W	142.031	0.135644	0.288103	0.470816	0.637772	0.847001
YDR349C	127.008	-0.176204	0.290578	-0.606392	0.544255	0.796854
YDR350C	46.5316	-0.338066	0.379859	-0.889978	0.373478	0.668686
YDR351W	53.9306	-0.122491	0.375253	-0.326423	0.744104	0.897612
YDR352W	31.8432	-0.670989	0.3989	-1.6821	0.09255	0.335994
YDR353W	509.152	0.263828	0.298119	0.884975	0.37617	0.670792
YDR354W	85.5555	-0.0196129	0.30139	-0.0650746	0.948115	0.982656
YDR356W	56.821	-0.0446071	0.427489	-0.104347	0.916894	0.972523
YDR357C	43.8897	-0.618091	0.414774	-1.49019	0.136175	0.405822
YDR358W	73.2246	-0.198764	0.359592	-0.55275	0.580435	0.814509
YBL084C	26.8029	-0.515178	0.414686	-1.24233	0.214114	0.51524
YDR359C	68.3114	0.981712	0.36313	2.70347	0.00686194	0.0696817
YDR361C	164.865	0.644642	0.318383	2.02474	0.0428945	0.219748
YDR362C	57.8114	0.248062	0.353934	0.70087	0.483384	0.751001
YDR363W	33.0258	-0.244912	0.381481	-0.642003	0.520871	0.779888
YDR363W-A	205.771	-0.0922555	0.397457	-0.232114	0.816449	0.92908
YDR364C	53.4315	-0.389652	0.36185	-1.07683	0.281556	0.582188
YDR365C	474.752	0.280497	0.311574	0.900258	0.367983	0.661912
YDR365W-B	215.568	-0.831394	0.443883	-1.873	0.0610681	0.268461
YBL082C	89.4114	0.445198	0.365553	1.21788	0.22327	0.525717
YDR367W	37.9132	-0.835857	0.431942	-1.93511	0.0529765	0.247209
YDR368W	127.542	-1.08314	0.332468	-3.25787	0.00112251	0.0214972
YDR369C	14.8866	-0.216726	0.540186	-0.401206	0.688269	0.871029
YDR370C	43.1616	-0.163652	0.358298	-0.456749	0.647851	0.851713
YDR371W	37.6739	-0.656853	0.409057	-1.60577	0.108324	0.363608
YDR372C	147.212	-0.128154	0.274687	-0.466544	0.640826	0.848613
YDR373W	43.6518	-0.349224	0.409045	-0.853754	0.393241	0.68093
YDR374C	0.61854	-0.981677	2.25369	-0.435586	0.663137	0.859533
YDR374W-A	15.1679	-1.36251	0.586479	-2.32321	0.0201678	0.143698
YBL081W	186.322	1.97924	0.450779	4.39071	1.12982e-05	0.000837388
YDR375C	62.1747	0.0487104	0.336924	0.144574	0.885047	0.961418
YDR376W	55.101	-0.289053	0.355623	-0.812809	0.416328	0.700466
YDR377W	367.121	-0.477188	0.382063	-1.24898	0.211674	0.51144
YDR378C	243.235	0.132302	0.288694	0.458276	0.646754	0.851145
YDR379W	57.2882	-0.277495	0.364211	-0.761907	0.446115	0.722784
YDR379C-A	50.0006	-0.924367	0.504195	-1.83335	0.0667501	0.281139
YDR380W	44.9443	-0.532092	0.39707	-1.34005	0.180231	0.474435
YDR381W	286.951	-0.155716	0.269464	-0.577875	0.563349	0.808308
YDR381C-A	38.0172	0.41325	0.423551	0.975678	0.329224	0.628927
YDR382W	1207.88	-0.0232489	0.255052	-0.0911538	0.92737	0.977037
YBL080C	39.1463	0.0497428	0.362829	0.137097	0.890954	0.963319
YDR383C	32.4199	0.500521	0.38541	1.29867	0.194056	0.490469
YDR384C	53.615	1.06613	0.443408	2.40439	0.0161996	0.124597
YDR385W	3450.01	0.0794335	0.294232	0.269969	0.787184	0.915894
YDR386W	17.5193	-0.189577	0.49185	-0.385436	0.699914	0.875967
YDR387C	41.8663	-0.527266	0.369639	-1.42643	0.153743	0.433741
YDR388W	291.963	-0.254097	0.271432	-0.936134	0.349204	0.645372
YDR389W	85.8881	0.137597	0.313541	0.438849	0.660771	0.858735
YDR390C	78.7286	-0.0269972	0.334189	-0.0807843	0.935613	0.978226
YDR391C	120.824	-0.123158	0.360955	-0.341202	0.732952	0.891888
YBL079W	92.2749	-0.160869	0.312778	-0.514323	0.607026	0.828977
YDR392W	47.2006	0.425794	0.373266	1.14072	0.253985	0.556329
YDR393W	42.7259	-0.0503364	0.377064	-0.133496	0.893801	0.964442
YDR394W	306.302	0.112384	0.266652	0.421465	0.673416	0.864414
YDR395W	92.9516	-0.182812	0.304393	-0.600578	0.548121	0.799254
YDR397C	150.493	-0.151197	0.338737	-0.446355	0.655341	0.855752
YDR398W	141.936	0.21514	0.310814	0.692182	0.488823	0.754793
YDR399W	182.625	0.130803	0.299229	0.437132	0.662016	0.859459
YDR400W	32.6543	-0.537108	0.397239	-1.3521	0.176342	0.468521
YDR402C	0.70566	-0.168141	2.02551	-0.083012	0.933842	0.978078
YDR403W	2.30165	0.736167	1.24086	0.59327	0.553	0.801619
YBL078C	52.6642	-0.378782	0.347616	-1.08966	0.275864	0.576584
YDR404C	70.2649	-0.773569	0.389154	-1.98782	0.0468313	0.229216
YDR405W	213.537	0.771042	0.2704	2.85149	0.00435155	0.0517382
YDR406W	58.4356	-0.562408	0.340872	-1.64991	0.098961	0.347156
YDR407C	53.374	-0.479476	0.372126	-1.28848	0.197579	0.49616
YDR408C	163.903	0.676041	0.288969	2.33949	0.01931	0.141285
YDR409W	22.5968	-0.0341856	0.445194	-0.0767879	0.938792	0.97911
YDR410C	24.9617	-0.179928	0.419103	-0.429317	0.667692	0.860515
YDR411C	69.1969	-0.587466	0.319043	-1.84134	0.0655718	0.279092
YDR412W	112.104	0.905518	0.353056	2.5648	0.0103235	0.0919129
YDR414C	18.9405	-0.063157	0.462892	-0.13644	0.891473	0.963319
YBL076C	540.13	-0.0677391	0.269061	-0.251761	0.801226	0.921522
YDR415C	54.2089	-0.190016	0.332031	-0.572284	0.56713	0.80895
YDR416W	28.546	0.154113	0.404832	0.380683	0.703438	0.878067
YDR418W	1019.84	-0.315404	0.250913	-1.25703	0.208744	0.508451
YDR419W	27.6554	-0.189852	0.416461	-0.455871	0.648483	0.851852
YDR420W	132.358	1.18912	0.365901	3.24983	0.00115474	0.0217509
YDR421W	29.6997	0.00281478	0.408927	0.00688333	0.994508	0.998463
YDR422C	74.5204	0.129102	0.362837	0.355812	0.721981	0.886859
YDR423C	63.1446	0.242916	0.341058	0.712242	0.476315	0.745156
YDR424C	176.994	0.666692	0.301216	2.21333	0.0268747	0.169103
YBL075C	35.5906	0.305998	0.400606	0.763838	0.444964	0.722396
YDR425W	25.8931	-0.51089	0.427574	-1.19486	0.232142	0.534424
YDR427W	152.375	-0.916119	0.339549	-2.69805	0.0069747	0.0698326
YDR428C	53.8607	-0.546404	0.350965	-1.55686	0.119503	0.38202
YDR429C	473.642	0.978677	0.251648	3.88907	0.000100628	0.00422267
YDR430C	75.261	0.152083	0.33141	0.458898	0.646308	0.851145
YDR432W	676.266	0.945084	0.379038	2.49337	0.0126536	0.105268
YDR434W	95.7856	-0.668489	0.301402	-2.21793	0.0265597	0.167673
YDR435C	43.9474	-0.503158	0.383398	-1.31236	0.189397	0.486012
YDR436W	65.8861	0.322399	0.353769	0.911324	0.362124	0.657731
YDR437W	9.44063	-0.246975	0.637021	-0.387703	0.698236	0.87515
YBL074C	9.43046	0.823401	0.671922	1.22544	0.220409	0.522807
YDR438W	15.2022	0.0127578	0.535874	0.0238074	0.981006	0.992775
YDR439W	31.3125	-0.2474	0.392879	-0.629711	0.528884	0.786193
YDR440W	52.3471	0.275071	0.361425	0.761073	0.446613	0.722998
YDR441C	45.9704	0.0347834	0.383627	0.0906699	0.927755	0.977062
YDR443C	34.2715	-0.0701448	0.405142	-0.173137	0.862544	0.950848
YDR444W	57.4066	0.0100479	0.338784	0.0296586	0.976339	0.991804
YDR447C	496.107	-0.523877	0.277137	-1.89032	0.0587155	0.262404
YDR448W	45.797	0.174757	0.371753	0.47009	0.638291	0.847107
YAL056W	108.59	0.321072	0.301319	1.06555	0.286626	0.588065
YDR449C	36.8628	0.20147	0.379179	0.531333	0.595188	0.823651
YDR450W	1966.97	0.298963	0.256594	1.16512	0.24397	0.546377
YDR451C	109.462	0.17389	0.297645	0.584219	0.559073	0.804914
YDR452W	192.162	0.00260435	0.295565	0.00881145	0.99297	0.99784
YDR453C	19.2187	-2.33257	0.674446	-3.4585	0.000543194	0.0135965
YDR454C	204.429	-0.449153	0.318939	-1.40827	0.159051	0.441807
YDR456W	74.1506	-0.379382	0.317895	-1.19342	0.232705	0.534857
YDR457W	177.395	-0.15344	0.284746	-0.538866	0.589979	0.820068
YDR458C	62.6169	-0.312618	0.341859	-0.914465	0.360473	0.656532
YDR459C	24.9378	-0.171408	0.465248	-0.368423	0.712558	0.883269
YBL072C	3090.88	0.05501	0.257392	0.213721	0.830765	0.934928
YDR460W	63.8729	0.438735	0.360865	1.21579	0.224066	0.526265
YDR461W	142.589	-2.48804	0.363225	-6.84986	7.39213e-12	1.40344e-08
YDR461C-A	68.4914	1.55583	0.380992	4.08363	4.43379e-05	0.00232143
YDR462W	123.095	0.58621	0.282322	2.07638	0.0378584	0.203518
YDR463W	174.002	0.407237	0.280994	1.44927	0.147261	0.42303
YDR464W	69.7581	0.023172	0.364003	0.0636588	0.949242	0.983002
YDR465C	225.713	0.852938	0.296598	2.87574	0.0040308	0.0492089
YDR466W	101.231	0.251297	0.293557	0.856042	0.391974	0.680215
YDR468C	94.7096	0.49227	0.301049	1.63518	0.102011	0.354207
YDR469W	78.7704	0.264509	0.313135	0.844712	0.398272	0.685652
YBL071C-B	10.3293	2.05635	0.775763	2.65074	0.00803157	0.0772954
YDR470C	50.3769	0.0406373	0.361294	0.112477	0.910445	0.971925
YDR471W	1148.01	0.639534	0.270152	2.36731	0.0179179	0.133495
YDR472W	38.0976	-0.686426	0.3837	-1.78897	0.0736203	0.293197
YDR473C	49.3269	0.547581	0.376045	1.45616	0.145349	0.41979
YDR475C	67.2312	-0.0294177	0.332412	-0.0884977	0.929481	0.977708
YDR476C	239.135	1.92258	0.472778	4.06656	4.77128e-05	0.00245313
YDR477W	165.304	0.0490937	0.295063	0.166384	0.867855	0.953204
YDR478W	9.94981	-0.300149	0.631186	-0.475532	0.634408	0.844939
YDR479C	87.4031	-0.226915	0.303957	-0.746537	0.455343	0.729108
YBL071W-A	60.3777	1.77923	0.4021	4.42485	9.65089e-06	0.000764967
YDR480W	28.3152	-0.175027	0.407365	-0.429656	0.667446	0.860515
YDR481C	215.554	-0.47009	0.292809	-1.60545	0.108395	0.363608
YDR482C	177.411	2.01494	0.363293	5.54631	2.91762e-08	6.93786e-06
YDR483W	241.088	-0.910227	0.29178	-3.11957	0.00181116	0.0291986
YDR484W	20.2907	-1.06529	0.468519	-2.27375	0.0229811	0.153325
YDR485C	75.2572	0.361479	0.329341	1.09758	0.272387	0.574095
YDR486C	122.825	0.287309	0.294028	0.977149	0.328495	0.628048
YDR487C	277.751	0.472721	0.277028	1.7064	0.0879327	0.327353
YDR488C	43.3928	1.39412	0.42749	3.26117	0.00110952	0.0214972
YDR489W	25.19	-0.383096	0.422541	-0.906649	0.364593	0.659085
YBL069W	38.6665	-0.117082	0.367758	-0.318365	0.750208	0.899944
YDR490C	89.3381	0.133468	0.29764	0.448422	0.653849	0.855618
YDR492W	81.5989	-0.49721	0.406656	-1.22268	0.22145	0.523971
YDR493W	45.1091	0.49136	0.354119	1.38756	0.165272	0.451945
YDR494W	133.285	0.166404	0.337733	0.492708	0.622219	0.838687
YDR495C	34.9316	-0.413755	0.412012	-1.00423	0.315268	0.616986
YDR496C	189.298	0.694197	0.299356	2.31897	0.0203967	0.144961
YDR497C	713.249	0.869807	0.337463	2.57748	0.00995222	0.089304
YDR498C	76.6739	-0.131545	0.324521	-0.405351	0.68522	0.869301
YDR499W	32.1883	0.3035	0.414496	0.732214	0.464038	0.736038
YDR500C	3525.21	1.60856	0.379271	4.2412	2.22327e-05	0.00134981
YBL068W	66.9939	-0.11296	0.325598	-0.346932	0.728642	0.889299
YDR501W	23.4937	0.431391	0.432832	0.99667	0.318925	0.619926
YDR502C	240.827	-0.548198	0.381541	-1.4368	0.150774	0.428948
YDR503C	29.289	-0.483837	0.433608	-1.11584	0.26449	0.566684
YDR504C	2.47063	-0.559807	1.20977	-0.46274	0.643551	0.850173
YDR505C	91.8605	0.244404	0.332947	0.734062	0.462911	0.73483
YDR506C	19.573	0.0860788	0.475026	0.181209	0.856204	0.94834
YDR507C	105.374	0.381749	0.354898	1.07566	0.282079	0.582637
YDR508C	471.589	-0.0659178	0.293945	-0.224252	0.822561	0.930908
YDR510W	372.481	-0.219712	0.269738	-0.814538	0.415337	0.699675
YBL067C	65.3535	-0.0396364	0.334823	-0.11838	0.905766	0.970926
YDR511W	49.473	-0.178158	0.39628	-0.449575	0.653017	0.855083
YDR512C	110.272	0.749471	0.34456	2.17516	0.0296184	0.177929
YDR513W	128.189	-1.52904	0.356636	-4.28741	1.80769e-05	0.00114628
YDR514C	46.6984	1.0704	0.399908	2.67663	0.00743675	0.0730491
YDR515W	29.582	0.701733	0.435126	1.61271	0.106807	0.361494
YDR516C	481.859	-0.691272	0.316215	-2.18608	0.0288096	0.1751
YDR517W	322.489	0.689083	0.335743	2.05241	0.0401298	0.210865
YDR518W	126.998	-0.821868	0.291253	-2.82184	0.00477495	0.0544354
YDR519W	54.2427	-0.125639	0.336075	-0.373844	0.708521	0.880752
YDR520C	35.1013	-0.594595	0.37984	-1.56538	0.117493	0.378549
YBL066C	88.0724	0.482892	0.352545	1.36973	0.170771	0.461095
YDR523C	5.2815	0.126687	0.807833	0.156824	0.875384	0.956503
YDR524C	52.232	-0.182489	0.355563	-0.51324	0.607784	0.8296
YDR524C-B	2764.83	0.484714	0.327272	1.48108	0.138586	0.408807
YDR525W-A	15.5261	-0.963724	0.541145	-1.7809	0.0749292	0.296342
YDR527W	99.1721	0.285286	0.322141	0.885594	0.375836	0.670792
YDR528W	40.3616	-1.10713	0.391683	-2.8266	0.00470453	0.0541216
YDR529C	899.313	-0.0338338	0.310268	-0.109047	0.913165	0.972523
YBL064C	250.379	-1.14181	0.36697	-3.11146	0.00186164	0.0296647
YDR530C	114.97	-0.178545	0.325587	-0.548379	0.583432	0.815964
YDR531W	40.2482	-0.917461	0.393198	-2.33333	0.0196308	0.142545
YDR532C	32.0698	0.458521	0.421201	1.0886	0.276329	0.577237
YDR533C	21.4058	-0.771781	0.516715	-1.49363	0.135272	0.405196
YDR534C	40.9921	2.11533	0.572376	3.6957	0.000219281	0.0073366
YDR536W	7.65348	-0.672827	0.755097	-0.891047	0.372904	0.668135
YDR538W	25.1145	-0.539061	0.445663	-1.20957	0.226444	0.527666
YDR539W	75.2329	-0.170616	0.344042	-0.495916	0.619954	0.837414
YDR540C	3.01994	-0.199624	1.03511	-0.192854	0.847074	0.942961
YDR541C	16.7877	-0.497575	0.495903	-1.00337	0.315682	0.616986
YBL063W	31.0863	-0.237226	0.402939	-0.588739	0.556036	0.803458
YDR542W	1.61373	2.18851	1.65854	1.31954	0.186988	0.483585
YDR545W	3.46455	5.51092	1.4487	3.80404	0.000142355	0.00530993
YEL077C	196.743	1.71657	0.445051	3.85702	0.000114777	0.00461289
YEL076C-A	3.46193	0.905558	1.01975	0.888023	0.374529	0.669622
YEL076C	2.13522	0.607734	1.25494	0.484274	0.628192	0.841648
YEL075C	0.661385	-2.55161	2.24201	-1.13809	0.255083	0.557763
YEL073C	4.96611	-2.19308	1.01277	-2.16542	0.0303558	0.180334
YEL072W	13.1397	-0.531817	0.588808	-0.903211	0.366414	0.660494
YEL071W	127.47	-1.16776	0.424737	-2.74937	0.00597097	0.0635535
YEL070W	45.0248	-0.425295	0.495128	-0.85896	0.390363	0.678917
YAL055W	62.1189	0.444585	0.333031	1.33497	0.181887	0.476161
YBL061C	60.3204	0.444142	0.341961	1.29881	0.19401	0.490469
YEL069C	1.29907	0.744068	1.69193	0.439774	0.660101	0.858327
YEL068C	43.7868	-0.542056	0.361911	-1.49776	0.134196	0.404328
YEL067C	16.6308	1.65302	0.521755	3.16819	0.0015339	0.0262968
YEL066W	28.1352	0.169933	0.408653	0.415837	0.677529	0.866575
YEL065W	143.827	0.141174	0.325778	0.433344	0.664765	0.859823
YEL064C	27.9928	-0.124297	0.416975	-0.298092	0.765633	0.90535
YEL063C	130.09	0.0192199	0.277807	0.0691842	0.944843	0.98076
YEL062W	25.9494	-0.315644	0.428841	-0.736041	0.461706	0.734156
YEL061C	60.6037	-0.0501726	0.379636	-0.13216	0.894858	0.965033
YEL060C	475.015	0.558362	0.324498	1.72069	0.0853066	0.320476
YBL060W	42.4238	0.53884	0.383051	1.40671	0.159515	0.442777
YEL059C-A	31.5305	0.496998	0.424003	1.17216	0.241134	0.543595
YEL058W	152.159	0.212197	0.274988	0.771658	0.440317	0.720439
YEL057C	80.2133	-0.854146	0.40118	-2.12908	0.0332474	0.189364
YEL056W	99.6706	-0.196547	0.299643	-0.655937	0.511865	0.774001
YEL055C	103.31	0.421452	0.31564	1.33523	0.181802	0.476161
YEL054C	918.83	0.095542	0.264181	0.361654	0.717611	0.885493
YEL053C	67.7705	-0.42451	0.326093	-1.30181	0.192982	0.49001
YEL052W	138.622	-0.453918	0.27952	-1.62392	0.104393	0.357392
YEL051W	447.955	-0.358947	0.284662	-1.26096	0.207324	0.507276
YBL059C-A	130.088	0.427367	0.313043	1.3652	0.17219	0.462441
YEL050C	118.14	0.473424	0.280932	1.68519	0.091951	0.335098
YEL049W	1.24996	1.84231	1.70698	1.07928	0.280463	0.580696
YEL048C	7.61157	0.416294	0.687725	0.605321	0.544966	0.796854
YEL047C	125.957	-0.325704	0.321967	-1.01161	0.311726	0.61412
YEL046C	398.552	0.0984032	0.368874	0.266766	0.789649	0.917266
YEL044W	59.536	0.425096	0.340432	1.2487	0.211775	0.511469
YEL043W	142.947	0.305823	0.295152	1.03615	0.300131	0.60142
YBL059W	62.434	0.475947	0.342885	1.38807	0.165116	0.451735
YEL042W	236.959	-0.168116	0.275041	-0.611238	0.541042	0.793964
YEL041W	17.9453	0.0569982	0.477333	0.11941	0.904951	0.970598
YEL040W	456.225	0.518357	0.328737	1.57681	0.114838	0.373392
YEL039C	82.1802	-0.139023	0.478868	-0.290316	0.771574	0.908662
YEL038W	64.9154	-0.0447839	0.332507	-0.134686	0.89286	0.963972
YEL037C	285.669	0.986919	0.331371	2.97829	0.0028986	0.0402299
YEL036C	220.238	0.895678	0.301742	2.96836	0.00299393	0.041073
YEL034W	1554.54	0.0207429	0.288068	0.0720068	0.942596	0.979948
YEL033W	66.8322	-0.954422	0.338981	-2.81556	0.00486921	0.0548098
YBL058W	321.255	-0.00323413	0.253567	-0.0127545	0.989824	0.996675
YEL032W	122.24	0.0886143	0.364931	0.242825	0.808141	0.924643
YEL031W	262.757	-0.194104	0.295111	-0.657732	0.510711	0.773315
YEL030W	26.5752	0.746198	0.42378	1.76081	0.0782697	0.304489
YEL029C	19.5049	-0.167491	0.479115	-0.349584	0.726651	0.888494
YEL027W	345.129	-0.520336	0.288875	-1.80125	0.0716634	0.291779
YEL026W	288.284	-0.420304	0.28618	-1.46867	0.141923	0.414693
YEL025C	47.477	-0.813153	0.356995	-2.27777	0.02274	0.152859
YEL024W	162.48	-0.568124	0.33416	-1.70016	0.0891017	0.330412
YBL057C	169.501	0.982877	0.313645	3.13373	0.00172601	0.0283056
YEL023C	24.8184	0.166047	0.428462	0.387541	0.698356	0.87515
YEL022W	129.721	-0.196564	0.327355	-0.600462	0.548198	0.799254
YEL021W	157.291	0.559071	0.320007	1.74706	0.0806271	0.309981
YEL020W-A	132.401	0.0964478	0.286873	0.336204	0.736717	0.894372
YEL020C	39.8029	0.468097	0.36382	1.28661	0.198229	0.496616
YEL019C	11.8664	0.413336	0.57375	0.720411	0.471272	0.740857
YEL018W	61.2049	0.496574	0.361399	1.37403	0.169432	0.458705
YEL017C-A	107.327	-0.157023	0.346343	-0.453374	0.65028	0.852549
YEL017W	81.296	-0.669158	0.340985	-1.96243	0.0497127	0.237018
YBL056W	217.61	-0.428959	0.264841	-1.61968	0.1053	0.358338
YEL016C	67.1936	-0.100776	0.322548	-0.312436	0.754709	0.901614
YEL015W	166.014	-0.180409	0.27387	-0.65874	0.510063	0.773315
YEL013W	77.0885	-0.867005	0.347583	-2.49438	0.0126177	0.105123
YEL012W	75.3344	0.35106	0.336157	1.04434	0.29633	0.59666
YEL011W	407.277	-1.3444	0.34765	-3.86709	0.000110141	0.00445797
YEL009C	844.366	-0.118649	0.239956	-0.494462	0.62098	0.83787
YEL007W	183.477	-0.0134607	0.309631	-0.0434733	0.965324	0.98885
YBL055C	33.9881	0.0566743	0.397031	0.142746	0.886491	0.962009
YEL006W	43.4781	-0.325998	0.403772	-0.807383	0.419446	0.703146
YEL005C	42.1239	-0.0102631	0.373434	-0.027483	0.978074	0.991804
YEL004W	14.818	-1.2306	0.541329	-2.27329	0.0230087	0.153325
YEL003W	117.665	-0.239752	0.333127	-0.719702	0.471709	0.740857
YEL002C	272.577	-0.62521	0.277126	-2.25605	0.0240676	0.157697
YEL001C	236.88	-0.181752	0.293496	-0.619268	0.53574	0.789896
YER001W	86.989	-1.10234	0.396922	-2.77723	0.00548239	0.0595961
YER002W	134.986	0.998201	0.331162	3.01424	0.00257624	0.0376026
YER003C	253.499	-0.416265	0.311078	-1.33814	0.180851	0.475192
YER004W	184.412	0.635844	0.31693	2.00626	0.0448283	0.224692
YBL054W	86.8837	1.37178	0.362654	3.78262	0.000155186	0.00568627
YER005W	45.3495	-0.287857	0.347196	-0.829092	0.407052	0.693861
YER006W	308.721	0.597691	0.308442	1.93777	0.0526508	0.246691
YER007W	8.119	0.0847896	0.685181	0.123748	0.901515	0.968769
YER007C-A	99.5163	-0.107041	0.292461	-0.366002	0.714364	0.883971
YER008C	99.0871	-0.121133	0.315959	-0.383382	0.701436	0.876719
YER009W	193.382	-0.752445	0.294011	-2.55924	0.0104901	0.0928731
YER010C	99.6333	0.277945	0.332278	0.836484	0.402883	0.689845
YER011W	187.593	-0.408417	1.05222	-0.388148	0.697907	0.87499
YBL052C	134.114	0.324745	0.332035	0.978043	0.328053	0.627809
YER012W	254.818	-0.298523	0.303688	-0.982993	0.325611	0.626521
YER013W	23.6258	0.251405	0.438708	0.573057	0.566606	0.80895
YER014W	40.9861	-0.147223	0.380716	-0.3867	0.698979	0.875564
YER015W	27.6117	-0.00780138	0.447327	-0.01744	0.986086	0.994977
YER016W	80.7245	0.306254	0.330863	0.925622	0.354643	0.651047
YER017C	140.286	0.0877659	0.317439	0.276481	0.782179	0.913582
YER018C	56.7616	1.28333	0.4558	2.81556	0.00486918	0.0548098
YER019W	74.1522	0.572789	0.429204	1.33454	0.182028	0.476311
YER019C-A	578.712	1.23347	0.367444	3.35688	0.000788282	0.0172152
YAL054C	24.9662	1.02557	0.453646	2.26072	0.0237763	0.156327
YBL051C	232.681	0.714769	0.319276	2.23872	0.0251744	0.161689
YER020W	144.974	0.668224	0.296423	2.2543	0.0241775	0.158235
YER021W	220.073	-0.593044	0.284571	-2.084	0.0371606	0.202169
YER022W	56.2956	-0.199496	0.378206	-0.52748	0.59786	0.824844
YER023W	363.418	-0.00441858	0.293152	-0.0150727	0.987974	0.996002
YER024W	28.1343	-0.901302	0.411923	-2.18803	0.0286671	0.1751
YER025W	649.448	0.605473	0.331351	1.82728	0.0676572	0.282427
YER026C	162.492	0.0290686	0.273707	0.106203	0.915421	0.972523
YER027C	238.428	0.518399	0.31601	1.64046	0.100911	0.352015
YER028C	4.25191	0.368878	0.872832	0.422622	0.672571	0.863912
YBL050W	106.749	-0.748177	0.376667	-1.98631	0.0469989	0.229721
YER029C	63.355	0.611274	0.367479	1.66343	0.0962272	0.342394
YER030W	314.492	0.373273	0.329712	1.13212	0.257585	0.560476
YER031C	294.038	0.433657	0.27575	1.57265	0.115801	0.375284
YER032W	84.8299	-0.321173	0.308638	-1.04062	0.298054	0.598465
YER033C	28.2544	-0.472479	0.420853	-1.12267	0.261577	0.563547
YER034W	25.2728	0.678937	0.430923	1.57554	0.115132	0.373753
YER035W	53.5016	-0.439955	0.401359	-1.09616	0.273007	0.574095
YER036C	540.646	0.273605	0.265264	1.03144	0.302334	0.604561
YER037W	27.3965	-2.90847	0.534329	-5.44321	5.23281e-08	1.1486e-05
YER038C	10.5768	-0.0336129	0.611984	-0.0549245	0.956199	0.986007
YBL049W	4.84397	-0.670757	0.906932	-0.73959	0.459549	0.732174
YER038W-A	0.875803	0.377237	1.80071	0.209493	0.834063	0.935351
YER039C	4.05617	-1.07953	0.927265	-1.16421	0.24434	0.546377
YER039C-A	6.09278	0.332714	0.753062	0.441815	0.658623	0.857832
YER040W	57.2633	0.624279	0.335976	1.8581	0.0631544	0.274054
YER041W	43.8769	0.0250617	0.37203	0.0673645	0.946292	0.981728
YER042W	35.3211	-0.0102255	0.432085	-0.0236655	0.981119	0.992775
YER043C	1207.05	0.735386	0.342195	2.14903	0.0316323	0.18421
YER044C	51.1237	-0.406361	0.414773	-0.97972	0.327225	0.62751
YER044C-A	0.73772	0.830607	2.12613	0.390667	0.696044	0.873998
YER045C	29.2039	-0.00307106	0.452609	-0.00678523	0.994586	0.998463
YBL047C	312.656	-0.168122	0.270774	-0.620894	0.534669	0.789741
YER046W	28.7327	-0.843302	0.451767	-1.86668	0.0619469	0.270905
YER047C	81.0147	0.546954	0.355013	1.54066	0.1234	0.389731
YER048C	228.914	0.0274525	0.287233	0.0955757	0.923858	0.975477
YER048W-A	100.139	-0.572273	0.345577	-1.65599	0.0977238	0.345117
YER049W	99.9393	0.033828	0.292935	0.11548	0.908065	0.97151
YER050C	132.924	-0.137588	0.31688	-0.434196	0.664146	0.85957
YER051W	29.0444	-0.117771	0.433529	-0.271657	0.785886	0.915241
YER052C	86.3124	-0.15364	0.309444	-0.496503	0.61954	0.837315
YER053C	132.81	-2.00805	0.340011	-5.90586	3.5082e-09	1.42344e-06
YBL046W	78.3744	1.38266	0.344478	4.01379	5.97521e-05	0.0029397
YER053C-A	4.09628	-3.2878	1.25197	-2.62611	0.00863663	0.0809347
YER054C	88.7221	-0.557407	0.335086	-1.66348	0.0962172	0.342394
YER055C	213.751	0.32444	0.268275	1.20936	0.226526	0.527666
YER056C	133.941	-0.324084	0.304222	-1.06529	0.286747	0.588065
YER056C-A	1096.34	0.430198	0.265337	1.62133	0.104948	0.358293
YER057C	287.135	-0.159372	0.287504	-0.554329	0.579354	0.813976
YER058W	77.9174	1.32425	0.350636	3.77672	0.000158904	0.00573966
YER059W	61.0334	0.00147275	0.343658	0.00428551	0.996581	0.998617
YER060W	13.2909	-1.07205	0.552203	-1.94141	0.0522082	0.246242
YER060W-A	3.33443	-0.0220126	1.02774	-0.0214184	0.982912	0.993458
YBL045C	699.924	0.033499	0.286751	0.116823	0.907	0.971188
YER061C	20.6635	0.164673	0.45648	0.360746	0.718289	0.885509
YER062C	78.6796	-2.06587	0.332859	-6.20645	5.41952e-10	4.41846e-07
YER063W	105.501	-0.234246	0.323279	-0.724593	0.468702	0.739939
YER064C	164.804	0.00188579	0.308487	0.00611303	0.995123	0.998562
YER065C	42.6949	0.249766	0.396232	0.630353	0.528464	0.786193
YER066W	9.25409	-0.219194	0.634989	-0.345194	0.729949	0.889918
YER067W	884.713	-1.24886	0.362311	-3.44692	0.000567011	0.0140693
YER068W	113.829	0.0853441	0.291707	0.292568	0.769852	0.907383
YER069W	24.6533	-0.0833289	0.469005	-0.177672	0.858981	0.948569
YBL044W	0.62316	1.82322	2.25721	0.80773	0.419246	0.703096
YER070W	330.153	-0.647108	0.305045	-2.12135	0.0338923	0.191589
YER071C	20.6072	-0.341364	0.451769	-0.755617	0.449879	0.724312
YER072W	790.373	-0.567045	0.283754	-1.99837	0.0456768	0.226283
YER073W	83.6269	0.174987	0.316498	0.552887	0.580341	0.814509
YER074W	713.247	-0.188899	0.263704	-0.71633	0.473788	0.742057
YER074W-A	69.2082	-0.685437	0.381009	-1.79901	0.0720178	0.291992
YER075C	55.2969	-0.135204	0.359266	-0.376335	0.706668	0.879705
YER076C	13.2519	-0.199518	0.543024	-0.36742	0.713306	0.883389
YER077C	59.6472	0.711646	0.333238	2.13555	0.0327162	0.188217
YBL043W	15.6982	0.447436	0.508036	0.880718	0.378471	0.672403
YER078C	49.3364	-0.457803	0.347582	-1.31711	0.187802	0.484533
YER079W	73.6593	-0.465939	0.362546	-1.28518	0.198728	0.497063
YER080W	199.242	-0.371936	0.294704	-1.26207	0.206925	0.507261
YER081W	115.147	1.73823	0.289706	5.99998	1.97338e-09	1.02382e-06
YER082C	91.6544	0.80517	0.35337	2.27855	0.0226941	0.15273
YER083C	213.277	0.856182	0.364411	2.3495	0.0187988	0.13852
YER084W	12.5401	1.15776	0.597576	1.93743	0.0526926	0.246691
YBL042C	49.4208	0.303906	0.374326	0.811876	0.416863	0.700838
YER086W	223.03	-0.107056	0.30539	-0.350555	0.725922	0.888113
YER087W	30.8627	-0.302702	0.392736	-0.770752	0.440854	0.720925
YER087C-B	167.283	0.19464	0.29823	0.652649	0.513983	0.774679
YER088C	439.535	0.721927	0.386547	1.86763	0.0618137	0.27053
YER089C	346.039	0.690433	0.371256	1.85972	0.0629245	0.273712
YER090W	126.119	-0.464107	0.29417	-1.57768	0.114639	0.373242
YER091C	165.007	-0.631047	0.8093	-0.779744	0.435541	0.715908
YER092W	59.6089	0.788959	0.34509	2.28624	0.02224	0.15128
YER093C	45.5427	0.368807	0.4182	0.881889	0.377837	0.672377
YER093C-A	40.3966	0.349666	0.405918	0.861421	0.389006	0.678502
YBL041W	228.851	0.31107	0.267348	1.16354	0.244611	0.546377
YER094C	343.961	0.574635	0.275285	2.08742	0.0368505	0.201295
YER095W	171.304	1.56663	0.404716	3.87093	0.000108419	0.0044501
YER096W	4.57659	1.74984	0.89247	1.96067	0.0499176	0.237796
YER098W	31.4591	-0.424167	0.414443	-1.02346	0.306089	0.607812
YER099C	101.077	0.423275	0.319339	1.32547	0.185015	0.479946
YER100W	109.856	-0.250982	0.315462	-0.795601	0.426264	0.709032
YER101C	25.4578	-0.354541	0.433343	-0.818154	0.413269	0.698823
YER102W	2348.48	0.107285	0.266399	0.402721	0.687153	0.870303
YER103W	72.8486	-1.22631	0.481816	-2.54518	0.0109223	0.0948757
YAL053W	102.063	0.130881	0.299936	0.436363	0.662573	0.859481
YBL040C	72.262	-0.219259	0.336118	-0.652327	0.51419	0.774679
YER104W	29.4869	0.731898	0.428205	1.70923	0.0874093	0.325829
YER105C	81.7611	-0.42598	0.327172	-1.30201	0.192914	0.49001
YER107C	55.2099	0.118152	0.379638	0.311223	0.755631	0.901614
YER109C	31.2788	0.266765	0.407349	0.65488	0.512545	0.774591
YER110C	341.182	0.258486	0.292023	0.885156	0.376072	0.670792
YER111C	51.9154	0.0904174	0.364605	0.247987	0.804144	0.923083
YER112W	99.0549	-0.0665546	0.332722	-0.200031	0.841456	0.939212
YER113C	62.5981	-0.14099	0.336028	-0.419579	0.674793	0.865111
YER114C	126.755	0.502716	0.330485	1.52114	0.128224	0.395882
YBL039W-B	11.4168	-0.582659	0.620483	-0.93904	0.34771	0.644071
YER115C	22.5592	0.0213706	0.444073	0.0481241	0.961617	0.987859
YER116C	68.13	0.661733	0.350653	1.88715	0.0591406	0.263047
YER117W	556.037	-0.381234	0.280758	-1.35787	0.174504	0.465807
YER118C	152.571	0.333598	0.274672	1.21453	0.224544	0.526705
YER119C	60.358	-0.147506	0.3559	-0.414458	0.678539	0.866962
YER120W	434.003	-0.175143	0.306592	-0.571258	0.567825	0.809537
YER121W	12.9909	-0.294089	0.546601	-0.538032	0.590555	0.820181
YER122C	329.553	-0.0596591	0.253629	-0.235221	0.814037	0.927537
YER123W	99.1197	0.0119062	0.290473	0.0409889	0.967305	0.9895
YER124C	179.089	-0.427797	0.290147	-1.47442	0.14037	0.41166
YBL039C	213.833	0.857535	0.294655	2.9103	0.0036108	0.0462037
YER125W	178.523	0.136481	0.285569	0.477926	0.632703	0.844245
YER126C	396.705	1.2289	0.275603	4.45895	8.23631e-06	0.000701562
YER127W	114.979	0.886935	0.295202	3.00451	0.00266011	0.0381939
YER128W	19.3905	0.386623	0.476265	0.811781	0.416917	0.700838
YER129W	112.829	0.116363	0.286293	0.406446	0.684415	0.869301
YER130C	39.1346	-0.0422835	0.386536	-0.109391	0.912892	0.972523
YER131W	1431.17	0.597854	0.257275	2.32379	0.0201366	0.143698
YER132C	63.3851	0.487766	0.335086	1.45565	0.14549	0.419987
YBL038W	96.1331	0.415339	0.347347	1.19575	0.231795	0.534056
YER133W	298.898	-0.333804	0.29157	-1.14485	0.252271	0.55394
YER134C	74.3203	-0.0958856	0.348309	-0.275289	0.783094	0.913978
YER136W	221.741	-0.538437	0.266913	-2.01727	0.043667	0.221913
YER137C	18.6762	0.681636	0.486974	1.39974	0.161592	0.44643
YER138C	148.567	0.656539	0.402438	1.6314	0.102805	0.355151
YBL037W	59.2446	-0.641969	0.339751	-1.88953	0.0588208	0.262668
YER137C-A	69.4667	1.47996	0.514698	2.87538	0.00403535	0.0492089
YER138W-A	26.7493	-0.772607	0.587147	-1.31587	0.188219	0.484629
YER139C	21.7965	-0.604891	0.47721	-1.26756	0.204956	0.505621
YER140W	39.6803	-0.204467	0.367612	-0.556204	0.578071	0.813577
YER141W	152.676	-0.660441	0.301137	-2.19316	0.0282957	0.173886
YER142C	28.8794	0.0349372	0.396906	0.0880237	0.929858	0.977708
YER143W	76.9827	0.0181119	0.334617	0.0541272	0.956834	0.986249
YER144C	46.9613	-0.250394	0.347926	-0.719676	0.471725	0.740857
YER145C	852.081	0.37198	0.397046	0.936867	0.348827	0.645372
YER146W	155.586	0.675466	0.279367	2.41784	0.0156129	0.121892
YBL036C	102.676	0.444767	0.313129	1.4204	0.155492	0.436128
YER147C	59.1912	0.958188	0.393417	2.43555	0.0148691	0.118468
YER148W	115.681	-0.162907	0.291838	-0.558211	0.5767	0.813436
YER149C	46.3441	-0.061672	0.36181	-0.170454	0.864653	0.951886
YER150W	87.5064	-1.82716	0.968661	-1.88627	0.0592582	0.26318
YER151C	136.455	0.432876	0.287567	1.5053	0.132246	0.401451
YER152C	65.454	0.393376	0.412575	0.953466	0.340354	0.637573
YER153C	19.3703	1.20509	0.561006	2.14808	0.0317075	0.184437
YER154W	104.734	0.835039	0.315995	2.64257	0.00822793	0.0783593
YER155C	116.299	-0.41585	0.305258	-1.36229	0.173106	0.464029
YBL035C	36.1235	-0.345714	0.394204	-0.876992	0.380491	0.673797
YER156C	264.964	0.200922	0.271442	0.740202	0.459177	0.731786
YER157W	34.027	-1.01882	0.423976	-2.40302	0.0162602	0.124895
YER158C	63.1068	0.444298	0.421877	1.05314	0.292275	0.593388
YER159C	216.903	0.558003	0.302271	1.84604	0.0648871	0.277594
YER160C	364.68	0.469008	0.360055	1.3026	0.192711	0.49001
YER159C-A	8.17789	-0.568385	0.73784	-0.770337	0.4411	0.720925
YER161C	161.022	1.04818	0.290566	3.60737	0.000309316	0.00905264
YER162C	36.0106	0.477089	0.372141	1.28201	0.199839	0.498026
YBL034C	21.7375	-0.0648549	0.457274	-0.141829	0.887215	0.962049
YER163C	61.01	0.523977	0.350762	1.49383	0.135221	0.405196
YER164W	113.067	0.144003	0.344763	0.417687	0.676176	0.865734
YER165W	781.385	0.116088	0.306658	0.378559	0.705016	0.879075
YER166W	178.589	0.363534	0.269662	1.34811	0.177624	0.470514
YER167W	84.8708	-0.0443567	0.316107	-0.140322	0.888406	0.962439
YER168C	50.0403	-0.0808576	0.356392	-0.226879	0.820518	0.930584
YER169W	48.6987	-0.462997	0.34364	-1.34733	0.177874	0.470619
YER170W	50.5962	0.460552	0.346694	1.32841	0.184042	0.478379
YER171W	82.5865	-0.0666684	0.313587	-0.2126	0.831639	0.934928
YER172C	67.7196	-0.0958428	0.356911	-0.268534	0.788288	0.916492
YBL033C	125.117	1.43912	0.327159	4.39884	1.08833e-05	0.000817252
YER173W	32.1977	-0.391229	0.389373	-1.00477	0.315008	0.616725
YER174C	43.2888	-1.17822	0.367354	-3.20731	0.00133981	0.0240044
YER175C	53.0968	-0.0392329	0.391126	-0.100308	0.9201	0.973878
YER176W	55.6076	0.170901	0.393325	0.434502	0.663924	0.85957
YER177W	3545.72	-0.831567	0.292777	-2.84027	0.00450752	0.0528715
YER178W	673.036	-0.441258	0.268045	-1.64621	0.099721	0.348932
YER179W	2.52342	-1.07306	1.1841	-0.906227	0.364816	0.659279
YER180C	18.7868	-0.594678	0.480739	-1.23701	0.216084	0.517339
YER180C-A	13.1127	0.0166395	0.534412	0.0311361	0.975161	0.991804
YBL032W	438.726	0.26113	0.320508	0.814737	0.415223	0.699675
YER182W	47.4469	-0.0104354	0.373592	-0.0279325	0.977716	0.991804
YER183C	34.9926	0.0333138	0.384657	0.0866064	0.930984	0.977761
YER184C	8.98199	-0.133214	0.672131	-0.198197	0.842891	0.940077
YER185W	1.22041	-2.26286	1.74074	-1.29994	0.193621	0.490237
YER186C	55.8785	-0.203558	0.365216	-0.557363	0.577279	0.813577
YER187W	4.06889	-0.426802	0.937588	-0.455213	0.648956	0.851988
YER188C-A	5.94207	0.240649	0.792493	0.303661	0.761386	0.904206
YER189W	1.44744	-1.54918	1.6698	-0.927766	0.353529	0.651046
YER190W	52.9846	2.27231	0.510811	4.44845	8.64938e-06	0.000725912
YAL051W	36.5487	-0.573211	0.376221	-1.5236	0.127608	0.395882
YBL031W	49.2174	0.237176	0.346432	0.684625	0.49358	0.758853
YFL066C	31.4699	1.10336	0.502118	2.19742	0.0279903	0.172506
YFL065C	7.14012	-0.101854	0.803289	-0.126797	0.899101	0.968141
YFL064C	6.06173	0.117132	0.83919	0.139577	0.888994	0.962894
YFL062W	26.5622	-0.689098	0.446454	-1.54349	0.122712	0.388358
YFL061W	1.30801	-0.9237	1.60977	-0.57381	0.566097	0.80895
YFL060C	21.0988	-0.0133043	0.454988	-0.0292411	0.976672	0.991804
YFL059W	53.1453	0.116649	0.367872	0.31709	0.751175	0.900202
YBL030C	1397.78	0.0946224	0.280255	0.337629	0.735643	0.893638
YFL058W	0.713273	-1.33687	2.0478	-0.652831	0.513865	0.774679
YFL056C	24.7889	0.358363	0.429812	0.833766	0.404413	0.692112
YFL055W	3.58142	-1.46496	1.05289	-1.39137	0.164113	0.450501
YFL054C	22.0768	0.168018	0.457497	0.367255	0.713429	0.883389
YFL052W	15.2394	-0.111584	0.534368	-0.208815	0.834592	0.935431
YFL050C	21.8737	-0.235389	0.445881	-0.527919	0.597555	0.824844
YFL049W	53.5269	-0.365025	0.371539	-0.982468	0.325869	0.626785
YFL048C	97.2326	-0.564063	0.314351	-1.79438	0.0727532	0.2927
YBL029C-A	20.0238	-0.106598	0.488178	-0.218358	0.82715	0.933564
YFL047W	78.0638	-0.146299	0.319136	-0.458421	0.64665	0.851145
YFL046W	84.8403	-0.0981492	0.417765	-0.234939	0.814256	0.927537
YFL045C	480.371	-0.620652	0.284879	-2.17865	0.0293573	0.176919
YFL044C	91.0507	0.525768	0.32815	1.60222	0.109108	0.364139
YFL042C	111.363	0.436859	0.321313	1.35961	0.173954	0.464992
YFL041W-A	2.77676	-0.257936	1.09785	-0.234947	0.81425	0.927537
YFL041W	102.973	0.084305	0.32908	0.256184	0.797809	0.920614
YFL039C	1588.96	-0.495533	0.26388	-1.87787	0.060399	0.266543
YFL038C	1042.51	0.120156	0.256814	0.467873	0.639875	0.847988
YBL029W	8.17214	-0.686679	0.758584	-0.905211	0.365354	0.660042
YFL037W	491.602	-0.169788	0.30571	-0.555388	0.578629	0.81376
YFL036W	107.224	0.094585	0.307628	0.307465	0.758489	0.902587
YFL034C-B	57.9593	0.658472	0.373771	1.7617	0.0781201	0.304322
YFL034C-A	98.0335	-0.527687	0.324911	-1.6241	0.104355	0.357392
YFL034W	60.4313	0.283434	0.3606	0.786007	0.431864	0.713636
YFL033C	106.535	0.0110868	0.292491	0.0379048	0.969764	0.990349
YFL031W	1160.08	0.96686	0.331714	2.91474	0.00355986	0.0458603
YFL030W	46.9756	0.856538	0.391842	2.18593	0.028821	0.1751
YFL029C	49.1409	0.587441	0.37502	1.56643	0.117249	0.378045
YBL028C	188.258	0.650554	0.289965	2.24356	0.0248609	0.160499
YFL028C	69.6958	0.414765	0.321566	1.28983	0.197111	0.495775
YFL027C	52.3744	0.394061	0.343989	1.14556	0.251977	0.55394
YFL026W	561.967	-1.3068	0.279161	-4.68116	2.85251e-06	0.00033223
YFL025C	26.4836	-0.439543	0.415203	-1.05862	0.289773	0.591252
YFL024C	68.525	0.33428	0.319319	1.04685	0.295167	0.596078
YFL023W	66.5776	0.839999	0.348737	2.40869	0.0160101	0.123306
YFL022C	279.751	0.00159396	0.320294	0.00497655	0.996029	0.998562
YFL021W	59.1907	0.51519	0.387854	1.32831	0.184076	0.478379
YFL020C	1.68614	-0.0684046	1.35947	-0.050317	0.95987	0.987379
YBL027W	3264.99	0.213947	0.246232	0.868883	0.384911	0.675318
YFL018C	748.34	0.0857238	0.263231	0.32566	0.744681	0.89785
YFL017W-A	35.8111	0.518278	0.396622	1.30673	0.191304	0.489353
YFL017C	64.4299	0.47177	0.325537	1.4492	0.147281	0.42303
YFL016C	186.659	0.575189	0.274499	2.09541	0.0361343	0.198859
YFL014W	80.5757	-4.65816	1.18351	-3.93587	8.28953e-05	0.00368615
YFL013C	130.042	0.609263	0.283311	2.15051	0.0315151	0.183867
YFL012W	1.13027	-0.663053	1.69243	-0.391776	0.695223	0.873773
YFL011W	14.0091	0.986282	0.581577	1.69588	0.0899094	0.331682
YFL010C	341.153	1.37671	0.388111	3.54722	0.00038932	0.0106309
YBL026W	79.0648	-0.339115	0.341502	-0.993009	0.320705	0.621272
YFL009W	56.2202	-0.286685	0.333927	-0.858527	0.390601	0.678917
YFL008W	56.1195	-0.258209	0.441728	-0.584542	0.558856	0.804914
YFL007W	148.469	-0.0966652	0.298226	-0.324134	0.745837	0.898316
YFL005W	321.691	0.227231	0.279167	0.813961	0.415667	0.699975
YFL004W	155.431	-1.0648	0.315683	-3.37301	0.000743518	0.0169054
YFL003C	1.42189	-3.65044	3.53555	-1.03249	0.301841	0.604137
YFL002W-A	43.7313	-1.06254	0.368017	-2.8872	0.00388688	0.0480139
YFL002W-B	21.5643	-0.762712	0.455184	-1.67561	0.0938139	0.337755
YBL025W	18.9396	-0.303299	0.46324	-0.654734	0.512639	0.774591
YFL002C	91.2348	0.402683	0.3106	1.29647	0.194815	0.491734
YFL001W	65.5322	0.164231	0.348172	0.471694	0.637145	0.846835
YFR001W	152.941	0.619182	0.370645	1.67056	0.0948095	0.340086
YFR002W	82.9436	-0.271925	0.336969	-0.806973	0.419682	0.703208
YFR003C	165.986	0.242758	0.276935	0.876587	0.380711	0.673797
YFR004W	194.117	0.202825	0.272728	0.743688	0.457065	0.730115
YFR005C	41.5255	-0.670601	0.363993	-1.84234	0.0654248	0.278975
YFR006W	260.216	-0.324877	0.265462	-1.22382	0.221022	0.523398
YFR007W	29.7252	-0.667481	0.419769	-1.59011	0.111809	0.369054
YBL024W	145.624	0.121392	0.289547	0.419248	0.675035	0.865111
YFR008W	31.491	0.314125	0.404446	0.776678	0.437349	0.717639
YFR009W	234.696	-0.215543	0.277084	-0.777895	0.436631	0.717052
YFR010W	130.054	-0.591893	0.310655	-1.90531	0.0567399	0.256996
YFR011C	126.57	0.392162	0.298056	1.31573	0.188264	0.484629
YFR012W	0.797621	-2.82151	1.99987	-1.41085	0.158288	0.44109
YFR013W	119.497	0.0933637	0.280197	0.333207	0.738978	0.895552
YFR014C	195.609	0.037152	0.272392	0.136392	0.891512	0.963319
YBL023C	89.6667	0.495941	0.365043	1.35858	0.174279	0.465643
YFR015C	772.581	-0.413187	0.347049	-1.19057	0.233821	0.53548
YFR016C	144.037	0.269732	0.307459	0.877294	0.380327	0.673797
YFR017C	306.692	-0.0371902	0.408146	-0.09112	0.927397	0.977037
YFR018C	123.332	1.06588	0.358733	2.97125	0.00296589	0.0408849
YFR019W	53.9337	-0.0379489	0.35134	-0.108012	0.913986	0.972523
YFR020W	22.3596	-0.415021	0.482669	-0.859846	0.389874	0.678771
YFR021W	44.2555	0.089681	0.403924	0.222025	0.824295	0.932458
YFR022W	30.0377	-0.0483375	0.409896	-0.117926	0.906126	0.971129
YAL049C	94.4487	0.377514	0.295547	1.27734	0.201482	0.500032
YBL022C	172.409	0.149727	0.319728	0.468297	0.639572	0.847988
YFR024C-A	255.316	0.204983	0.280464	0.730871	0.464858	0.736704
YFR025C	152.02	0.179123	0.316613	0.565746	0.571566	0.811585
YFR026C	7.61178	0.687691	0.66354	1.0364	0.300017	0.601403
YFR027W	21.2551	0.771692	0.460192	1.67689	0.0935633	0.337755
YFR028C	150	0.589273	0.290981	2.02513	0.0428544	0.21974
YFR029W	64.5556	0.751438	0.380215	1.97635	0.048115	0.232903
YBL021C	91.4907	1.64878	0.305692	5.3936	6.90616e-08	1.40762e-05
YFR030W	59.6457	-1.02677	0.385343	-2.66457	0.00770872	0.0749466
YFR031C	56.4966	0.0897825	0.384766	0.233343	0.815495	0.928578
YFR031C-A	2348.77	0.0790465	0.264491	0.298863	0.765044	0.90535
YFR032C	1.16993	-0.720925	1.68252	-0.428478	0.668303	0.860758
YFR032C-A	580.599	-0.713827	0.272917	-2.61555	0.00890845	0.0823995
YFR032C-B	14.1264	1.35225	0.595503	2.27076	0.0231614	0.153636
YFR033C	1969.37	1.50643	0.284068	5.30306	1.13879e-07	1.96942e-05
YFR034C	89.6104	1.36024	0.377996	3.59855	0.000319992	0.00931733
YBL020W	82.3083	0.00667716	0.329878	0.0202413	0.983851	0.993776
YFR036W	118.547	1.70522	0.378257	4.50811	6.54061e-06	0.000583239
YFR037C	431.612	0.817666	0.256948	3.18222	0.0014615	0.025352
YFR038W	49.1517	0.125215	0.360012	0.347808	0.727984	0.889029
YFR039C	71.7023	0.130908	0.313632	0.417393	0.676391	0.865734
YFR040W	124.655	0.170984	0.333542	0.512633	0.608208	0.8296
YFR041C	39.1065	0.00178636	0.383864	0.00465363	0.996287	0.998562
YFR042W	28.8917	-0.482117	0.411343	-1.17206	0.241175	0.543595
YFR043C	22.3332	0.272909	0.435832	0.626179	0.531198	0.787926
YFR044C	499.309	-0.205975	0.258797	-0.795893	0.426094	0.709026
YBL019W	18.2703	0.034839	0.49256	0.0707305	0.943612	0.980081
YFR045W	34.9273	-0.269361	0.381475	-0.706104	0.480124	0.748857
YFR046C	44.5983	0.190644	0.353562	0.53921	0.589742	0.820068
YFR047C	121.909	-0.273189	0.328476	-0.831687	0.405586	0.69281
YFR048W	47.4543	0.156026	0.359118	0.43447	0.663947	0.85957
YFR049W	76.9329	-0.0838469	0.346319	-0.242109	0.808696	0.924643
YFR050C	257.372	0.149053	0.27469	0.542621	0.58739	0.819215
YFR051C	313.755	-0.333845	0.283035	-1.17952	0.238191	0.540285
YFR052W	155.494	-0.589188	0.28659	-2.05586	0.0397961	0.20971
YFR053C	5806.94	-0.621502	0.323173	-1.92313	0.0544641	0.250667
YFR055W	22.4391	0.380774	0.510705	0.745584	0.455918	0.72924
YBL018C	36.0774	0.928491	0.388977	2.38701	0.0169862	0.129253
YGL263W	4.2521	0.117314	2.1265	0.0551675	0.956005	0.986007
YGL261C	2.57143	3.18015	1.44611	2.1991	0.0278707	0.172328
YGL259W	3.07183	0.172417	1.01309	0.170189	0.864862	0.951932
YGL258W-A	0.999824	-0.846921	1.72561	-0.490794	0.623572	0.839302
YGL258W	0.875786	0.349791	1.96303	0.17819	0.858574	0.948569
YGL257C	59.1675	-0.166265	0.327458	-0.507746	0.611631	0.832737
YGL256W	53.1198	-0.275791	0.341032	-0.808695	0.41869	0.702371
YBL017C	228.358	-0.183377	0.279228	-0.65673	0.511355	0.773675
YGL255W	22.2411	-0.486667	0.444352	-1.09523	0.273417	0.574095
YGL254W	38.275	0.462862	0.384433	1.20401	0.228585	0.530084
YGL253W	1362.87	0.244642	0.340365	0.718764	0.472286	0.740884
YGL252C	119.501	-0.000154386	0.289222	-0.000533798	0.999574	0.999586
YGL251C	14.1005	-1.12984	0.548251	-2.06082	0.0393207	0.208359
YGL250W	26.752	-0.753021	0.420294	-1.79165	0.0731886	0.292703
YGL249W	1.73871	-1.93483	1.53554	-1.26003	0.207657	0.50732
YGL248W	69.6123	-0.525676	0.338388	-1.55347	0.12031	0.38358
YGL247W	16.2358	-0.41645	0.617735	-0.674156	0.500212	0.765242
YBL016W	123.162	0.323431	0.309433	1.04524	0.295913	0.59653
YGL246C	56.862	0.143245	0.330665	0.433202	0.664868	0.859823
YGL245W	1017.45	-0.194795	0.251752	-0.77376	0.439073	0.719343
YGL244W	234.606	0.322287	0.289635	1.11274	0.265822	0.566908
YGL243W	30.0317	0.158115	0.405581	0.389848	0.696649	0.874046
YGL242C	71.638	0.0310117	0.345253	0.0898231	0.928428	0.977261
YGL241W	37.3965	-0.0249079	0.40001	-0.0622682	0.950349	0.983396
YGL240W	3.56143	-2.24299	1.15729	-1.93814	0.052606	0.246691
YGL238W	90.3685	-0.848021	0.324023	-2.61716	0.00886643	0.082144
YGL237C	86.609	1.25159	0.391908	3.1936	0.00140513	0.024674
YGL236C	89.8659	1.10366	0.373881	2.95191	0.00315818	0.0422101
YBL015W	228.612	-0.536335	0.397534	-1.34916	0.177287	0.469938
YGL234W	173.465	-0.102431	0.318894	-0.321209	0.748052	0.899045
YGL233W	75.8242	-0.813168	0.374364	-2.17213	0.0298457	0.178917
YGL232W	60.2628	-0.423498	0.424703	-0.997162	0.318686	0.619673
YGL231C	135.031	0.171001	0.334105	0.511818	0.608779	0.829783
YGL230C	0.687663	-0.0325528	2.03747	-0.0159771	0.987253	0.995451
YGL229C	24.4298	-0.909957	0.471559	-1.92968	0.0536466	0.248911
YGL228W	243.648	0.246936	0.266398	0.926946	0.353955	0.651047
YGL227W	65.0519	0.527764	0.346929	1.52125	0.128198	0.395882
YGL226C-A	81.9279	0.199016	0.324108	0.614042	0.539188	0.793023
YGL226W	146.961	1.93252	0.378677	5.10335	3.33698e-07	5.44118e-05
YGL225W	147.647	-0.708796	0.290185	-2.44257	0.0145832	0.117015
YGL224C	66.1798	-0.218804	0.320175	-0.683387	0.494362	0.759646
YGL223C	75.1237	-0.0268752	0.320413	-0.0838766	0.933155	0.977918
YGL222C	78.124	-0.0238506	0.342199	-0.0696981	0.944434	0.980514
YGL221C	226.207	0.468357	0.298477	1.56916	0.116612	0.377269
YGL220W	199.553	1.05554	0.317516	3.32436	0.000886206	0.0187836
YGL219C	161.679	0.393075	0.301595	1.30332	0.192466	0.49001
YGL216W	74.0514	0.0284277	0.318234	0.0893294	0.92882	0.977462
YGL215W	205.367	0.295433	0.277861	1.06324	0.287672	0.588537
YGL213C	79.6445	-0.302994	0.31744	-0.954492	0.339835	0.637573
YGL212W	32.8873	0.521354	0.412502	1.26388	0.206273	0.506486
YGL211W	46.4632	-0.0291077	0.367772	-0.0791461	0.936916	0.978226
YGL210W	130.52	0.974041	0.294131	3.31159	0.000927683	0.0191822
YGL209W	2.66401	-0.192141	1.19815	-0.160365	0.872593	0.954733
YGL208W	53.8094	0.482479	0.390516	1.23549	0.216648	0.517647
YGL207W	173.731	0.20174	0.302322	0.667302	0.50458	0.769133
YGL206C	148.113	-0.785364	0.310675	-2.52793	0.0114738	0.0976734
YGL205W	11.4953	1.70897	0.643338	2.65641	0.00789775	0.0762648
YAL067C	2.27536	-0.12017	1.31087	-0.0916719	0.926959	0.977037
YAL048C	24.2262	-0.34849	0.446904	-0.779787	0.435516	0.715908
YBL014C	41.1678	0.40247	0.367685	1.0946	0.27369	0.574246
YGL204C	11.8404	-0.0529443	0.618951	-0.0855388	0.931833	0.977918
YGL203C	170.634	0.561603	0.284801	1.97191	0.0486197	0.233718
YGL202W	322.328	-0.276455	0.26286	-1.05172	0.292928	0.593679
YGL201C	96.9489	0.642806	0.335928	1.91353	0.0556807	0.25374
YGL200C	449.662	0.269693	0.275416	0.97922	0.327471	0.627562
YGL198W	119.652	-0.224992	0.347299	-0.647833	0.517093	0.776592
YGL197W	108.962	-0.115938	0.292007	-0.39704	0.691338	0.872698
YBL013W	3.041	1.22888	1.08839	1.12908	0.258863	0.561724
YGL196W	93.7379	-0.950961	0.315894	-3.01038	0.00260923	0.0377941
YGL195W	208.424	-0.108656	0.308997	-0.351639	0.725109	0.888113
YGL194C-A	16.0756	-0.374898	0.541059	-0.692896	0.488375	0.754588
YGL194C	44.5981	0.0930147	0.353173	0.263369	0.792266	0.917877
YGL193C	14.361	-0.580148	0.532265	-1.08996	0.27573	0.576584
YGL191W	203.566	-0.370045	0.295575	-1.25195	0.210589	0.510332
YGL190C	106.725	0.0971418	0.33557	0.289483	0.772212	0.908878
YGL189C	2510.44	0.0626833	0.250822	0.249911	0.802656	0.92261
YBL011W	137.728	0.70617	0.345866	2.04174	0.0411769	0.213633
YGL188C-A	20.5007	0.110782	0.461024	0.240295	0.810101	0.92539
YGL187C	199.852	-0.184263	0.313996	-0.586833	0.557316	0.804274
YGL186C	72.2445	0.503992	0.360147	1.39941	0.161691	0.44643
YGL185C	37.6663	-0.212291	0.376598	-0.563707	0.572953	0.81187
YGL184C	6.05422	1.01273	0.84039	1.20507	0.228175	0.529649
YGL183C	1.119	0.350187	1.69094	0.207096	0.835935	0.935611
YGL181W	142.636	0.46609	0.285998	1.62969	0.103166	0.355408
YGL180W	18.7904	-0.196314	0.492543	-0.398573	0.690208	0.871803
YGL179C	21.1841	-0.431051	0.458828	-0.939461	0.347494	0.64388
YGL178W	50.307	-0.394515	0.354086	-1.11418	0.265203	0.566859
YBL010C	38.2843	0.576916	0.363182	1.5885	0.112173	0.369827
YGL176C	25.8055	-0.624682	0.488219	-1.27951	0.200717	0.499124
YGL175C	22.5451	-0.0157875	0.481588	-0.0327822	0.973848	0.991804
YGL174W	40.6728	0.0346547	0.378968	0.0914448	0.927139	0.977037
YGL173C	339.515	-0.17617	0.260274	-0.676863	0.498493	0.764347
YGL172W	116.842	0.102142	0.3103	0.32917	0.742027	0.897215
YGL171W	76.9751	0.71803	0.389619	1.8429	0.0653433	0.278919
YGL169W	46.003	-0.0933369	0.344631	-0.270832	0.786521	0.915309
YGL168W	0.873955	0.268152	1.96597	0.136397	0.891507	0.963319
YBL009W	40.3114	-0.426271	0.372094	-1.1456	0.251961	0.55394
YGL167C	142.608	-0.551456	0.294393	-1.8732	0.0610412	0.268461
YGL166W	57.0347	1.29968	0.400174	3.24778	0.0011631	0.0217633
YGL164C	116.693	0.770866	0.319097	2.41578	0.0157016	0.122106
YGL163C	35.3507	0.0432076	0.414485	0.104244	0.916976	0.972523
YGL162W	29.3503	0.221241	0.394049	0.561455	0.574487	0.81187
YGL161C	193.275	0.328192	0.293598	1.11783	0.26364	0.565506
YGL160W	59.5596	-0.670371	0.364876	-1.83726	0.0661718	0.28015
YGL159W	17.0303	-1.37805	0.574727	-2.39775	0.0164959	0.126196
YGL158W	1.19624	0.993565	1.62306	0.612155	0.540436	0.793964
YBL008W-A	1.78453	-0.451688	1.39781	-0.32314	0.746589	0.8987
YGL157W	2.5464	-1.6533	1.23314	-1.34072	0.180011	0.474135
YGL156W	34.9369	-1.30572	0.451766	-2.89026	0.00384929	0.0478861
YGL155W	76.2717	-0.108986	0.313861	-0.347242	0.728409	0.889205
YGL154C	18.3787	0.533063	0.481126	1.10795	0.267884	0.569602
YGL153W	82.6668	0.0260512	0.354283	0.0735321	0.941383	0.979588
YGL151W	55.3517	-0.0310198	0.379322	-0.081777	0.934824	0.978226
YGL150C	139.1	0.585588	0.309068	1.89469	0.0581339	0.260416
YGL148W	713.846	0.889034	0.30364	2.92793	0.00341231	0.044768
YGL147C	1765.92	0.868456	0.333445	2.60449	0.00920103	0.0848308
YGL146C	39.3145	0.607162	0.390961	1.553	0.120423	0.383727
YBL008W	38.1415	0.376146	0.437903	0.858971	0.390357	0.678917
YGL145W	39.316	-0.606146	0.374962	-1.61656	0.105974	0.359548
YGL144C	23.2106	0.299542	0.456339	0.656403	0.511565	0.773788
YGL143C	53.2317	0.138362	0.337624	0.40981	0.681945	0.867852
YGL142C	53.8071	-0.515302	0.365125	-1.4113	0.158155	0.44109
YGL141W	43.2691	-0.756529	0.383864	-1.97082	0.0487439	0.233766
YGL140C	83.4306	-0.143391	0.33553	-0.427355	0.669121	0.861225
YGL139W	73.4529	0.286656	0.314044	0.912788	0.361354	0.656976
YGL137W	339.04	-0.135087	0.26111	-0.517357	0.604907	0.827866
YGL136C	28.8083	-0.34505	0.401107	-0.860243	0.389655	0.678597
YBL007C	308.726	0.106359	0.299968	0.354568	0.722913	0.887488
YGL135W	1627.07	-0.329823	0.246902	-1.33585	0.181599	0.476161
YGL134W	120.665	-0.0254864	0.2994	-0.085125	0.932162	0.977918
YGL133W	25.624	-0.0866059	0.465798	-0.18593	0.8525	0.94588
YGL131C	38.5158	0.244378	0.390096	0.626457	0.531016	0.787926
YGL130W	90.5764	-0.0243795	0.320945	-0.0759616	0.93945	0.979437
YGL129C	110.802	0.12443	0.289839	0.429307	0.6677	0.860515
YGL128C	52.7331	0.536025	0.370766	1.44572	0.148255	0.425152
YGL127C	86.5719	0.335033	0.367959	0.910516	0.362551	0.657731
YGL126W	57.6993	0.437903	0.407748	1.07395	0.282843	0.583371
YGL125W	22.7466	0.629035	0.454296	1.38464	0.166163	0.453511
YBL006C	149.938	0.893294	0.287037	3.11212	0.0018575	0.0296647
YGL124C	30.8376	-0.215463	0.39848	-0.540712	0.588706	0.81985
YGL123W	3183.59	-0.116173	0.247217	-0.469923	0.63841	0.847107
YGL122C	373.425	0.894692	0.327535	2.73159	0.00630296	0.0655983
YGL121C	67.597	-1.60675	0.519712	-3.09162	0.00199064	0.0307043
YGL120C	278.47	0.117919	0.300421	0.392512	0.69468	0.873773
YGL119W	43.4189	-0.216525	0.364036	-0.594789	0.551984	0.800959
YGL117W	27.2592	0.360685	0.47036	0.766829	0.443183	0.721107
YGL116W	79.9896	0.402794	0.305496	1.31849	0.187339	0.483994
YGL115W	127.87	-0.795023	0.334599	-2.37605	0.0174992	0.131112
YBL005W	27.9108	-0.293757	0.424911	-0.691336	0.489354	0.755292
YGL114W	42.4903	-0.0363978	0.372873	-0.0976145	0.922238	0.975211
YGL113W	35.9896	0.195938	0.385945	0.507683	0.611676	0.832737
YGL112C	104.815	-0.238082	0.286576	-0.830784	0.406096	0.693059
YGL111W	95.4713	0.269252	0.320544	0.839983	0.400918	0.687718
YGL110C	52.9014	0.182978	0.35458	0.516041	0.605826	0.82804
YGL108C	81.1226	0.54166	0.317612	1.70542	0.0881169	0.327825
YGL107C	81.8581	0.0284073	0.316393	0.089785	0.928458	0.977261
YGL106W	342.963	0.650519	0.256949	2.53171	0.0113507	0.0974116
YGL105W	1027.89	0.162078	0.265698	0.610009	0.541856	0.794954
YGL104C	32.4816	-1.297	0.447649	-2.89736	0.00376313	0.0474087
YAL047C	21.4106	0.0695922	0.482451	0.144247	0.885305	0.961418
YBL005W-B	376.052	-0.560111	0.266403	-2.1025	0.0355097	0.196295
YGL103W	4978.11	1.11448	0.339428	3.28342	0.00102558	0.02048
YGL101W	98.6324	-0.181996	0.314946	-0.577864	0.563356	0.808308
YGL100W	190.041	-0.205098	0.308562	-0.664688	0.50625	0.770856
YGL099W	90.5276	0.222546	0.33724	0.659903	0.509316	0.772844
YGL098W	28.8427	0.122139	0.404794	0.30173	0.762858	0.904932
YGL097W	103.795	0.346229	0.291715	1.18687	0.235278	0.53716
YGL096W	14.7094	-1.33534	0.609264	-2.19173	0.028399	0.174272
YBL005W-A	80.0073	-1.19002	0.341351	-3.48621	0.000489911	0.0128844
YGL095C	87.3105	-0.463928	0.336486	-1.37874	0.167974	0.456489
YGL094C	106.879	0.0356602	0.304358	0.117165	0.906729	0.971188
YGL093W	42.6225	0.238041	0.356111	0.668446	0.503849	0.768842
YGL092W	72.1169	-0.107599	0.330269	-0.325794	0.74458	0.89785
YGL091C	40.6882	0.289915	0.378433	0.766092	0.443622	0.721132
YGL090W	33.0329	0.034149	0.407376	0.0838267	0.933194	0.977918
YGL087C	79.7115	-0.157737	0.324685	-0.485814	0.627099	0.841648
YGL086W	46.2208	-0.183948	0.442774	-0.415444	0.677817	0.866651
YGL085W	19.1915	-0.157537	0.48126	-0.327343	0.743408	0.897215
YGL084C	67.0954	-0.742674	0.317821	-2.33677	0.0194513	0.141935
YGL083W	40.4896	-0.753449	0.383177	-1.96632	0.0492617	0.235655
YGL082W	78.1513	-0.560346	0.327798	-1.70942	0.0873727	0.325829
YGL081W	15.8733	0.417272	0.562763	0.74147	0.458408	0.730968
YGL080W	91.0542	-0.224353	0.30356	-0.739074	0.459862	0.732348
YGL079W	22.5724	0.0540594	0.466198	0.115958	0.907686	0.971341
YGL078C	236.046	0.548297	0.277419	1.97642	0.0481068	0.232903
YGL077C	123.697	0.251936	0.308525	0.816583	0.414167	0.699305
YGL076C	1870.14	0.101285	0.265426	0.381596	0.702761	0.877679
YBL004W	94.739	0.267261	0.4451	0.600451	0.548206	0.799254
YGL075C	14.6416	-0.188643	0.569725	-0.331113	0.740559	0.896279
YGL073W	90.8756	0.138425	0.309382	0.447423	0.654569	0.855618
YGL071W	128.308	0.710405	0.305788	2.3232	0.0201686	0.143698
YGL070C	68.1903	0.159439	0.368535	0.43263	0.665283	0.860042
YGL068W	170.822	-0.0444631	0.274456	-0.162005	0.871302	0.95403
YGL067W	96.244	-0.499363	0.311367	-1.60377	0.108764	0.364139
YGL066W	80.9036	0.774405	0.320818	2.41385	0.0157851	0.122566
YGL065C	40.9505	-1.00818	0.368203	-2.73811	0.00617932	0.0649455
YBL003C	527.3	-0.263923	0.297975	-0.885723	0.375767	0.670792
YGL064C	29.984	0.733485	0.398551	1.84038	0.0657125	0.279449
YGL063W	18.7867	1.28747	0.511874	2.51521	0.0118961	0.100728
YGL062W	283.547	-0.162034	0.269909	-0.600327	0.548288	0.799254
YGL061C	48.9178	0.54486	0.364022	1.49678	0.134451	0.404328
YGL060W	31.1496	-0.90412	0.456408	-1.98095	0.0475972	0.231378
YGL059W	32.7861	-0.15824	0.424563	-0.372712	0.709363	0.880958
YGL058W	93.4892	0.26055	0.29852	0.872805	0.382769	0.67438
YGL057C	26.3343	-0.111996	0.415843	-0.269322	0.787682	0.916286
YGL056C	218.868	0.831296	0.36427	2.28209	0.0224842	0.152035
YGL055W	1181.14	-0.717141	0.391673	-1.83097	0.0671051	0.28161
YBL002W	458.496	-0.521863	0.390594	-1.33608	0.181524	0.476161
YGL054C	209.081	-0.643282	0.312669	-2.05739	0.0396489	0.209239
YGL053W	86.9177	-0.464413	0.311055	-1.49302	0.135431	0.405196
YGL051W	3.70262	0.19089	0.919704	0.207556	0.835576	0.935611
YGL050W	46.0783	0.28004	0.357752	0.782776	0.433758	0.714538
YGL049C	114.204	0.114067	0.310542	0.367316	0.713383	0.883389
YGL048C	233.575	-0.151449	0.260504	-0.581369	0.560992	0.806813
YGL047W	20.9107	-0.832126	0.463101	-1.79686	0.072358	0.292663
YBL001C	386.266	-0.132172	0.310119	-0.426199	0.669963	0.86192
YGL045W	37.6054	-1.09812	0.389598	-2.81859	0.00482351	0.0547272
YGL044C	56.0346	0.658543	0.346686	1.89953	0.0574942	0.258682
YGL043W	131.892	0.0525916	0.289301	0.181789	0.855748	0.94834
YGL041W-A	75.5882	-0.363653	0.37291	-0.975176	0.329473	0.629074
YGL040C	166.035	-0.20715	0.28792	-0.719471	0.471851	0.740857
YGL039W	56.388	-1.44076	0.424543	-3.39368	0.000689605	0.0161215
YGL038C	214.599	-0.426161	0.293338	-1.4528	0.14628	0.4212
YGL037C	619.559	-1.27423	0.34597	-3.68307	0.000230445	0.00747244
YBR001C	79.7401	-0.21365	0.332933	-0.641722	0.521054	0.779888
YGL036W	74.193	-0.310049	0.326322	-0.950131	0.342046	0.63852
YGL035C	164.722	0.458307	0.308186	1.48711	0.136985	0.406746
YGL033W	2.23752	0.0855325	1.35409	0.0631661	0.949634	0.983119
YGL032C	108.134	-1.34517	0.369098	-3.64447	0.000267941	0.00831053
YGL031C	1041	-0.104588	0.240546	-0.434793	0.663713	0.85957
YGL030W	753.024	-0.171608	0.257533	-0.666355	0.505184	0.769439
YGL029W	142.995	1.09573	0.33197	3.3007	0.000964456	0.0195183
YGL028C	226.406	0.637325	0.353815	1.80129	0.071657	0.291779
YGL027C	165.942	0.164467	0.303213	0.542415	0.587533	0.819215
YBR002C	102.728	1.2639	0.321639	3.92955	8.51039e-05	0.00373606
YGL026C	280.882	-0.00896371	0.285507	-0.0313957	0.974954	0.991804
YGL025C	106.574	1.02246	0.387841	2.6363	0.00838162	0.0791947
YGL023C	207.165	1.28254	0.357398	3.58855	0.000332518	0.00952852
YGL022W	296.004	0.16695	0.303752	0.549626	0.582576	0.815667
YGL021W	84.7853	-0.48313	0.318285	-1.51792	0.129035	0.395882
YGL020C	76.8951	-0.392469	0.342672	-1.14532	0.252076	0.55394
YGL019W	239.022	0.786433	0.303344	2.59254	0.00952688	0.0865763
YGL018C	45.5419	0.662825	0.357426	1.85444	0.0636762	0.275072
YGL017W	33.2699	0.183544	0.388081	0.472952	0.636247	0.846599
YGL016W	38.31	-0.481972	0.386965	-1.24552	0.21294	0.513631
YBR003W	106.574	-0.898436	0.303196	-2.96322	0.00304441	0.0415594
YGL014W	107.985	-0.0465104	0.322592	-0.144177	0.885361	0.961418
YGL013C	68.2433	0.0253794	0.337961	0.0750958	0.940138	0.979588
YGL012W	295.797	-0.0865406	0.266178	-0.325123	0.745088	0.89785
YGL011C	303.906	-0.0835892	0.256821	-0.325477	0.74482	0.89785
YGL010W	9.39032	-1.25317	0.659795	-1.89934	0.0575202	0.258682
YGL009C	109.942	-0.614006	0.321008	-1.91274	0.0557811	0.253862
YGL008C	1726.69	-0.465707	0.310084	-1.50187	0.133129	0.402847
YGL007C-A	1.65475	1.06733	1.43628	0.743122	0.457408	0.73019
YGL006W-A	1.0441	0.719334	1.74464	0.41231	0.680112	0.866964
YAL046C	53.1962	0.913741	0.38147	2.39532	0.016606	0.126868
YBR004C	16.2449	-0.670669	0.534537	-1.25467	0.209597	0.509599
YGL006W	68.6539	-0.870803	0.341886	-2.54706	0.0108636	0.0945889
YGL005C	105.842	0.352641	0.29789	1.18379	0.236495	0.538616
YGL004C	57.5406	0.339744	0.348258	0.975554	0.329286	0.628927
YGL003C	99.277	0.682534	0.355781	1.91841	0.0550593	0.252232
YGL002W	47.2943	-0.93887	0.425455	-2.20674	0.027332	0.17112
YGL001C	103.151	-0.625247	0.337404	-1.85311	0.0638666	0.2755
YGR001C	162.319	0.397374	0.310054	1.28163	0.199973	0.498143
YGR002C	46.9855	0.0725639	0.360312	0.201392	0.840392	0.938208
YGR003W	22.8804	-0.200794	0.450528	-0.445685	0.655825	0.855752
YGR004W	42.4061	-0.211092	0.375566	-0.562065	0.574072	0.81187
YBR005W	15.4192	0.220532	0.510125	0.43231	0.665516	0.860042
YGR005C	148.485	0.155079	0.311035	0.498589	0.618069	0.836874
YGR006W	17.4786	-0.161851	0.492296	-0.328768	0.742331	0.897215
YGR007W	129.13	0.111334	0.284826	0.390886	0.695881	0.873998
YGR008C	566.47	-0.83312	0.340997	-2.44319	0.0145581	0.117015
YGR009C	140.724	0.210875	0.324937	0.648974	0.516355	0.776503
YGR010W	62.4317	-0.198598	0.326819	-0.607671	0.543406	0.796205
YGR012W	63.2953	0.332547	0.341252	0.974492	0.329812	0.629137
YGR013W	76.0953	0.574463	0.311433	1.84458	0.0650992	0.278085
YGR014W	536.796	0.339268	0.30353	1.11774	0.263678	0.565506
YGR015C	21.9088	-1.13899	0.494348	-2.30402	0.0212216	0.147518
YBR006W	31.8673	-0.694763	0.438364	-1.5849	0.112989	0.371383
YGR016W	3.20598	-1.79722	1.10254	-1.63007	0.103086	0.355408
YGR017W	161.09	0.159964	0.288892	0.553714	0.579775	0.814368
YGR018C	0.59291	-0.236932	2.36278	-0.100277	0.920125	0.973878
YGR019W	87.24	-0.960452	0.363986	-2.63871	0.00832231	0.078896
YGR020C	544.334	0.0924286	0.263776	0.350406	0.726034	0.888113
YGR021W	80.7879	0.964352	0.31077	3.10311	0.00191501	0.0300633
YGR023W	43.7897	1.51398	0.48448	3.12496	0.0017783	0.0288317
YGR024C	76.8028	-0.228082	0.3137	-0.727071	0.467183	0.738563
YGR026W	182.841	-0.818182	0.354256	-2.30958	0.0209114	0.146972
YBR007C	40.8773	0.21012	0.362626	0.579439	0.562293	0.807704
YGR027C	1232.91	-1.2132	0.290792	-4.17207	3.01849e-05	0.00167248
YGR027W-B	661.882	-0.543565	0.33792	-1.60856	0.107712	0.363089
YGR027W-A	13.9485	0.0627228	0.59665	0.105125	0.916277	0.972523
YGR028W	49.9559	-0.582565	0.359585	-1.62011	0.10521	0.358338
YGR029W	82.2643	0.193892	0.31061	0.62423	0.532477	0.788287
YGR030C	26.0863	0.388242	0.445863	0.870766	0.383882	0.67472
YGR031W	118.064	0.976196	0.361778	2.69833	0.00696878	0.0698326
YBR008C	18.4752	-0.349854	0.510325	-0.685551	0.492996	0.758159
YGR032W	81.5625	-1.08686	0.314238	-3.45871	0.000542759	0.0135965
YGR033C	95.7021	-0.0872484	0.305652	-0.28545	0.775299	0.910793
YGR034W	1102.58	-0.0935025	0.239277	-0.39077	0.695967	0.873998
YGR035C	125.014	1.51362	0.330845	4.57502	4.76174e-06	0.000468539
YGR036C	24.9255	-0.897139	0.471141	-1.90418	0.0568863	0.257454
YGR037C	513.041	-0.596049	0.283397	-2.10323	0.0354453	0.196295
YGR038W	34.2324	-0.797407	0.431276	-1.84895	0.0644653	0.276619
YBR009C	692.404	0.68174	0.269588	2.52882	0.0114446	0.0976734
YGR038C-B	677.899	1.19868	0.373772	3.20698	0.00134137	0.0240044
YGR038C-A	267.721	1.3429	0.427487	3.14138	0.00168153	0.0279781
YGR040W	67.2174	0.0206411	0.327202	0.0630837	0.9497	0.983119
YGR041W	48.7433	0.172296	0.358007	0.481264	0.630329	0.843035
YGR042W	55.2856	0.992607	0.355084	2.79542	0.00518327	0.057106
YGR043C	11.4341	-1.93897	0.705154	-2.74971	0.0059648	0.0635535
YGR044C	103.782	-0.39606	0.298718	-1.32587	0.184884	0.479825
YGR046W	58.3482	-0.830238	0.388481	-2.13714	0.0325867	0.187944
YGR047C	38.9996	0.39504	0.365454	1.08096	0.279717	0.580251
YGR048W	80.5452	-0.292375	0.320282	-0.912867	0.361312	0.656976
YBR010W	346.062	-0.815401	0.315582	-2.5838	0.00977182	0.0882401
YGR049W	100.773	0.190922	0.364378	0.523966	0.600302	0.825723
YGR050C	5.72273	0.185186	0.758948	0.244004	0.807228	0.924643
YGR052W	2.60525	-3.44712	1.5184	-2.27022	0.0231941	0.153636
YGR053C	12.2737	0.043574	0.566322	0.0769422	0.93867	0.97911
YGR054W	155.204	-0.0627794	0.301132	-0.208478	0.834856	0.935431
YGR055W	155.815	-1.25472	0.400128	-3.1358	0.00171386	0.0282688
YGR056W	65.6305	-0.259261	0.324795	-0.798231	0.424736	0.708623
YGR057C	20.4799	-0.285062	0.462843	-0.615895	0.537964	0.792095
YGR058W	48.3123	0.761047	0.385224	1.97559	0.0482007	0.232929
YGR059W	0.869336	-1.68682	2.0165	-0.83651	0.402868	0.689845
YBR011C	1821.2	0.335536	0.276893	1.21179	0.225593	0.527312
YGR060W	512.733	-0.247968	0.29393	-0.84363	0.398876	0.686072
YGR061C	192.463	0.433282	0.313933	1.38017	0.167534	0.455728
YGR062C	35.0068	-0.264163	0.38129	-0.692814	0.488426	0.754588
YGR063C	77.0368	1.30349	0.358776	3.63317	0.000279965	0.00854416
YGR065C	40.1937	-0.544587	0.371413	-1.46626	0.142578	0.414693
YGR066C	2.27857	-0.307236	1.16633	-0.263421	0.792226	0.917877
YGR067C	11.5229	-0.393252	0.607682	-0.647135	0.517544	0.776723
YGR068C	29.6264	0.758563	0.446939	1.69724	0.0896515	0.331244
YGR070W	42.3471	-1.12727	0.410084	-2.74887	0.00598006	0.0635535
YBR012W-B	245.527	0.093875	0.289603	0.32415	0.745824	0.898316
YGR071C	48.9767	-0.528907	0.34757	-1.52173	0.128078	0.395882
YGR072W	27.0092	0.167079	0.495311	0.337321	0.735875	0.89373
YGR074W	77.1911	0.0249419	0.329901	0.0756042	0.939734	0.979555
YGR075C	8.73614	-0.543806	0.684675	-0.794254	0.427047	0.709869
YGR076C	70.1868	0.288565	0.364045	0.792663	0.427974	0.710014
YGR077C	84.225	-0.188035	0.330793	-0.568436	0.569739	0.811072
YGR078C	75.7005	0.620765	0.308924	2.00944	0.0444902	0.2241
YGR079W	142.97	1.33994	0.412413	3.24903	0.001158	0.0217509
YGR080W	108.984	-0.379578	0.319579	-1.18774	0.234934	0.536952
YGR081C	60.5949	0.818207	0.330192	2.47797	0.0132132	0.108744
YBR012W-A	21.5279	-0.930286	0.478544	-1.94399	0.0518961	0.245378
YGR082W	281.164	0.352149	0.276085	1.27551	0.202129	0.500891
YGR083C	179.794	0.297195	0.306315	0.970226	0.331934	0.631028
YGR084C	102.404	0.243907	0.305958	0.797193	0.425339	0.70894
YGR085C	3232.23	0.805686	0.272336	2.95843	0.00309208	0.0419157
YGR086C	2151.73	0.539887	0.325319	1.65956	0.0970023	0.343633
YGR087C	1.10332	1.46603	1.84901	0.792873	0.427852	0.710014
YGR088W	27.5998	-1.86261	0.488619	-3.81199	0.000137853	0.00521011
YGR089W	78.9009	-0.352229	0.379775	-0.927467	0.353684	0.651047
YGR090W	87.8478	-0.633791	0.379135	-1.67168	0.0945883	0.33972
YAL044W-A	92.7335	0.151988	0.322926	0.470658	0.637885	0.847001
YBR013C	8.4639	-1.50474	0.710258	-2.11858	0.0341257	0.192423
YGR091W	30.0436	0.216239	0.40801	0.529984	0.596123	0.824545
YGR092W	52.966	-0.715061	0.403771	-1.77096	0.0765678	0.300738
YGR093W	36.4012	-0.140619	0.39956	-0.351933	0.724888	0.888113
YGR094W	478.95	-0.000670241	0.291803	-0.00229689	0.998167	0.999586
YGR095C	63.3411	0.142679	0.330995	0.43106	0.666425	0.860083
YGR096W	17.1218	0.137967	0.504133	0.273671	0.784337	0.914978
YGR097W	74.4795	-0.0501252	0.333405	-0.150343	0.880494	0.959148
YGR098C	42.2542	-0.535561	0.396452	-1.35088	0.176733	0.469123
YGR099W	58.3893	-0.100624	0.337421	-0.298216	0.765538	0.90535
YGR100W	81.7117	-0.23438	0.331047	-0.707996	0.478948	0.74822
YGR101W	38.3424	-0.341112	0.378928	-0.900203	0.368012	0.661912
YGR102C	75.0741	-0.067346	0.330764	-0.203607	0.83866	0.937558
YGR103W	477.288	0.893034	0.344018	2.5959	0.00943446	0.0864036
YGR104C	30.9741	0.212309	0.392426	0.541017	0.588496	0.819757
YGR105W	137.693	0.225438	0.293326	0.768558	0.442156	0.721107
YGR106C	259.296	-0.612284	0.26922	-2.27429	0.0229486	0.153325
YGR108W	78.7191	-0.874431	0.343323	-2.54696	0.0108664	0.0945889
YGR109C	15.4192	-1.78364	0.586918	-3.03899	0.00237372	0.0350422
YBR014C	63.6992	-0.0408447	0.343662	-0.118851	0.905393	0.970821
YGR109W-B	102.851	-0.360597	0.30123	-1.19708	0.231275	0.533071
YGR109W-A	0.994038	-0.310408	1.83608	-0.16906	0.865749	0.952417
YGR110W	15.9221	-0.0625324	0.517761	-0.120775	0.90387	0.969621
YGR111W	73.2362	-0.875854	0.342453	-2.55759	0.0105402	0.0929718
YGR112W	62.0695	0.54874	0.340403	1.61203	0.106956	0.361609
YGR113W	48.1124	-0.104402	0.38306	-0.272546	0.785202	0.91508
YGR116W	203.883	-0.36218	0.30882	-1.17279	0.240881	0.543595
YGR117C	57.7318	-0.378965	0.357667	-1.05955	0.289351	0.590815
YGR118W	846.085	0.0694729	0.243848	0.284903	0.775718	0.911085
YBR015C	213.456	0.0257653	0.297519	0.0866005	0.930989	0.977761
YGR119C	130.962	0.308674	0.301262	1.0246	0.305551	0.607655
YGR120C	30.5056	-0.251702	0.409834	-0.614157	0.539112	0.793023
YGR121C	30.8454	1.53777	0.425426	3.61467	0.000300735	0.00884687
YGR122W	39.1497	-0.490958	0.379277	-1.29446	0.195507	0.493045
YGR123C	78.0608	0.24226	0.321234	0.754156	0.450756	0.724822
YGR124W	677.407	0.115803	0.301566	0.384004	0.700976	0.876719
YBR016W	632.727	1.8046	0.391927	4.60443	4.13591e-06	0.000437105
YGR125W	52.9517	-0.238355	0.385581	-0.618172	0.536462	0.790496
YGR126W	4.16197	-0.22788	0.918684	-0.248051	0.804095	0.923083
YGR127W	23.5384	-0.793537	0.468683	-1.69312	0.0904327	0.332753
YGR128C	89.8101	-0.0568362	0.33162	-0.17139	0.863917	0.951574
YGR129W	38.5132	0.7895	0.3975	1.98617	0.0470149	0.229721
YGR130C	181.745	0.189699	0.303359	0.625328	0.531756	0.788037
YGR131W	4.67181	-1.03825	0.936886	-1.10819	0.267779	0.569591
YGR132C	357.251	0.490085	0.275365	1.77977	0.075114	0.296456
YGR133W	36.0659	0.210441	0.400132	0.525929	0.598938	0.824844
YGR134W	37.4373	-0.0622302	0.368076	-0.169069	0.865742	0.952417
YBR017C	112.991	0.210245	0.31494	0.667571	0.504408	0.769133
YGR135W	312.356	-0.417504	0.284354	-1.46825	0.142035	0.414693
YGR136W	179.137	0.100824	0.311197	0.323989	0.745947	0.898316
YGR138C	20.6432	-0.308537	0.526738	-0.585749	0.558044	0.804841
YGR140W	64.8645	0.399439	0.335191	1.19168	0.233388	0.535374
YGR141W	33.3831	0.104117	0.383767	0.271302	0.786159	0.915241
YGR142W	17.8626	0.0533992	0.539877	0.0989099	0.92121	0.974846
YGR143W	78.9928	-0.627243	0.305986	-2.04991	0.0403733	0.21158
YBR018C	4391.15	-0.96278	0.275691	-3.49225	0.000478973	0.012714
YGR145W	132.384	0.624334	0.376328	1.65902	0.0971123	0.343809
YGR146C	18.5184	-1.52859	0.545578	-2.80178	0.00508216	0.0563182
YGR147C	177.958	1.25289	0.290654	4.31058	1.62824e-05	0.00107215
YGR148C	1034.8	0.025571	0.246701	0.103652	0.917446	0.972523
YGR149W	23.2237	-0.728885	0.502036	-1.45186	0.146541	0.42174
YGR150C	64.5953	-0.0484578	0.34866	-0.138983	0.889463	0.96322
YGR152C	65.8527	0.687388	0.318577	2.15768	0.0309524	0.181976
YGR153W	5.65668	1.46967	0.841315	1.74687	0.0806591	0.309981
YBR019C	7256.44	-0.401842	0.237108	-1.69477	0.0901198	0.332056
YGR154C	13.9468	-0.545574	0.534653	-1.02042	0.307527	0.608972
YGR155W	482.119	-1.19844	0.264452	-4.53178	5.84876e-06	0.000548923
YGR156W	29.5762	0.548113	0.41281	1.32776	0.184257	0.478633
YGR157W	124.878	-0.85442	0.343394	-2.48816	0.0128406	0.106359
YGR158C	87.4031	0.835798	0.321088	2.60302	0.00924072	0.0850594
YGR159C	659.919	0.534925	0.324274	1.64961	0.0990233	0.347156
YGR161C	97.242	0.516319	0.437954	1.17894	0.238424	0.540383
YGR161W-C	57.1096	0.782504	0.350567	2.23211	0.0256076	0.163033
YGR161W-B	43.7313	-1.06254	0.368017	-2.8872	0.00388688	0.0480139
YGR161W-A	21.5643	-0.762712	0.455184	-1.67561	0.0938139	0.337755
YBR020W	6967.28	-0.745294	0.240921	-3.09352	0.00197797	0.0306446
YGR161C-D	397.189	0.602827	0.317324	1.89972	0.0574696	0.258682
YGR162W	418.004	0.299969	0.325915	0.92039	0.357369	0.654642
YGR163W	73.2707	0.123615	0.36919	0.334828	0.737755	0.894683
YGR165W	125.542	-0.359987	0.298542	-1.20582	0.227887	0.529541
YGR166W	37.4313	-0.84532	0.426352	-1.98268	0.0474029	0.230826
YGR167W	514.861	-0.383005	0.274844	-1.39354	0.163457	0.449566
YGR168C	16.7102	-0.876262	0.521222	-1.68117	0.0927303	0.33604
YBR021W	127.304	0.560319	0.307015	1.82505	0.0679928	0.283031
YGR169C	59.1772	0.609312	0.329544	1.84895	0.0644644	0.276619
YGR169C-A	172.514	0.353055	0.347479	1.01605	0.309606	0.611181
YGR170W	64.1264	-0.532261	0.341147	-1.56021	0.11871	0.380607
YGR171C	39.4211	-0.285527	0.369361	-0.77303	0.439505	0.719728
YGR172C	32.0607	-0.890602	0.410229	-2.17099	0.0299322	0.179223
YGR173W	64.3757	0.155649	0.325821	0.477715	0.632853	0.844248
YGR174C	174.802	0.547516	0.305338	1.79314	0.0729499	0.2927
YGR174W-A	5.72567	-1.40692	0.889198	-1.58223	0.113597	0.371732
YGR175C	565.485	0.524496	0.30958	1.69422	0.0902231	0.332196
YAL044C	199.822	0.603506	0.29283	2.06094	0.0393088	0.208359
YBR022W	26.359	-0.172502	0.473325	-0.364447	0.715524	0.88435
YGR177C	21.5231	0.018522	0.473922	0.0390823	0.968825	0.989988
YGR178C	151.166	0.0942924	0.28487	0.331002	0.740643	0.896279
YGR179C	54.9973	-0.0559236	0.342821	-0.163128	0.870418	0.953816
YGR180C	1424.14	0.0207346	0.28055	0.0739069	0.941084	0.979588
YGR181W	96.4636	-0.116253	0.323805	-0.359021	0.719579	0.886006
YGR183C	169.114	-0.197353	0.327656	-0.602318	0.546962	0.79875
YGR184C	113.013	-0.175175	0.298549	-0.586754	0.557369	0.804274
YGR185C	504.796	0.00913053	0.241746	0.0377692	0.969872	0.990349
YGR186W	150.096	0.350754	0.289535	1.21144	0.225727	0.527312
YBR023C	69.989	-0.120692	0.332175	-0.363339	0.716352	0.88435
YGR187C	102.648	0.967958	0.328229	2.94904	0.00318766	0.0424055
YGR188C	29.7293	0.611381	0.41129	1.4865	0.137148	0.406746
YGR189C	336.959	0.382094	0.372553	1.02561	0.305076	0.607655
YGR191W	87.9957	-0.365135	0.322801	-1.13115	0.257994	0.560476
YGR192C	13728.4	-0.490926	0.332826	-1.47502	0.140207	0.41166
YGR193C	167.037	0.0459707	0.272719	0.168564	0.866139	0.952417
YGR194C	76.276	-0.478175	0.371633	-1.28669	0.198203	0.496616
YGR195W	47.8777	-0.212051	0.371103	-0.571407	0.567724	0.809537
YBR024W	62.039	-0.234779	0.337245	-0.696167	0.486324	0.752971
YGR196C	84.7342	0.562843	0.348043	1.61716	0.105843	0.359548
YGR197C	31.467	0.718762	0.399166	1.80066	0.0717564	0.291813
YGR198W	85.3384	-0.370055	0.312114	-1.18564	0.235765	0.537773
YGR199W	63.9737	-0.661981	0.334429	-1.97944	0.0477666	0.232004
YGR200C	126.452	0.141229	0.323749	0.436231	0.662669	0.859481
YGR201C	23.1192	0.533896	0.474035	1.12628	0.260048	0.562221
YGR202C	167.782	0.355513	0.26397	1.34679	0.178046	0.470858
YGR203W	49.2903	0.36463	0.40812	0.893438	0.371623	0.666305
YGR204W	444.926	0.533509	0.336187	1.58694	0.112527	0.370549
YBR025C	758.207	-0.0300399	0.243823	-0.123204	0.901946	0.969014
YGR205W	49.4368	-0.564883	0.365316	-1.54629	0.122035	0.387134
YGR206W	33.4749	-0.385348	0.458734	-0.840026	0.400894	0.687718
YGR207C	132.15	-0.0898199	0.377739	-0.237783	0.812049	0.92707
YGR208W	77.2935	0.368282	0.311271	1.18316	0.236746	0.538935
YGR209C	311.011	-0.903871	0.295618	-3.05756	0.00223144	0.0333372
YGR210C	181.225	0.790112	0.291466	2.71082	0.00671171	0.0683995
YGR211W	186.218	0.238433	0.271921	0.876846	0.380571	0.673797
YGR212W	12.7741	0.108183	0.551887	0.196023	0.844592	0.941423
YGR214W	2079.05	0.34394	0.260362	1.32101	0.186498	0.483135
YBR026C	121.867	-0.60641	0.312141	-1.94275	0.0520469	0.245684
YGR215W	83.3454	0.296415	0.37037	0.800321	0.423525	0.707362
YGR216C	27.3601	-0.786149	0.416649	-1.88684	0.059182	0.263047
YGR217W	35.9337	-0.502964	0.430805	-1.1675	0.24301	0.546046
YGR218W	129.472	-0.621746	0.297864	-2.08735	0.0368566	0.201295
YGR220C	73.9344	0.0719238	0.356045	0.202008	0.839911	0.938037
YGR221C	79.7729	-0.122705	0.311073	-0.394457	0.693244	0.873751
YGR222W	50.3866	-0.794925	0.410174	-1.93802	0.0526211	0.246691
YBR028C	84.5143	-0.348464	0.302294	-1.15273	0.249021	0.551553
YGR223C	63.6317	0.0115417	0.325999	0.0354039	0.971758	0.991051
YGR225W	2.56613	-4.51935	1.51887	-2.97546	0.00292545	0.040425
YGR227W	52.6259	-0.315455	0.347692	-0.907283	0.364257	0.658773
YGR229C	306.549	0.50137	0.279491	1.79387	0.072834	0.2927
YGR230W	36.9365	-0.622738	0.402959	-1.54542	0.122246	0.387372
YGR231C	291.691	0.314594	0.271092	1.16047	0.245858	0.548305
YGR232W	64.771	-0.968045	0.396385	-2.44218	0.0145987	0.117015
YGR233C	88.7911	-0.716519	0.326314	-2.1958	0.0281065	0.173035
YGR234W	732.572	-0.711509	0.307642	-2.31278	0.0207346	0.146451
YBR029C	217.554	0.594679	0.342189	1.73787	0.0822342	0.313737
YGR235C	140.797	0.173747	0.279376	0.621912	0.534	0.789722
YGR236C	2.75374	0.186283	1.07478	0.173322	0.862399	0.950848
YGR237C	98.9944	0.209338	0.297145	0.704496	0.481124	0.749644
YGR238C	31.1173	-0.509662	0.433019	-1.177	0.239196	0.541059
YGR239C	75.3388	0.172838	0.333072	0.51892	0.603816	0.827764
YGR240C	431.569	-0.343908	0.295525	-1.16372	0.244537	0.546377
YGR240C-A	0.873955	0.268152	1.96597	0.136397	0.891507	0.963319
YGR241C	151.506	0.5736	0.297458	1.92834	0.053813	0.249107
YGR243W	88.6933	0.706396	0.339799	2.07886	0.0376298	0.203032
YGR244C	512.119	0.202218	0.257438	0.785504	0.432158	0.713636
YBR030W	53.3652	0.454655	0.33913	1.34065	0.180033	0.474135
YGR245C	271.64	1.09157	0.348877	3.1288	0.0017552	0.0286198
YGR246C	68.7495	0.202466	0.349022	0.580094	0.561851	0.807475
YGR247W	49.2375	0.488127	0.364547	1.339	0.180571	0.474675
YGR248W	38.0449	-2.47513	0.515928	-4.79743	1.60714e-06	0.000208454
YGR249W	2.26747	-2.3061	1.4408	-1.60057	0.109471	0.364287
YGR250C	95.2928	-0.37384	0.297549	-1.2564	0.208972	0.508573
YGR251W	65.459	0.869572	0.328253	2.64909	0.00807092	0.0775433
YGR252W	88.7864	-0.193171	0.308773	-0.625609	0.531572	0.787991
YGR253C	355.104	0.0666285	0.267979	0.248633	0.803645	0.923083
YGR254W	1462.81	-1.859	0.444151	-4.1855	2.84538e-05	0.00159202
YBR031W	2499.48	0.184596	0.282404	0.653661	0.51333	0.774679
YGR255C	201.651	-0.157445	0.301282	-0.522583	0.601264	0.826449
YGR256W	6.69756	-1.4251	0.872126	-1.63406	0.102247	0.354295
YGR257C	109.62	0.559641	0.314938	1.77699	0.0755698	0.297432
YGR258C	37.8494	0.423234	0.399101	1.06047	0.288931	0.590379
YGR260W	228.792	-0.0853042	0.289912	-0.294242	0.768573	0.906852
YGR261C	98.5512	-0.456132	0.304428	-1.49832	0.134049	0.404328
YGR262C	153.931	0.478268	0.317662	1.50558	0.132174	0.401451
YGR263C	19.6774	-0.412539	0.490986	-0.840225	0.400782	0.687718
YGR264C	285.675	-0.13955	0.283959	-0.491443	0.623113	0.839298
YBR033W	41.8193	-0.105065	0.379475	-0.27687	0.78188	0.913582
YGR266W	75.0594	0.281825	0.338102	0.83355	0.404534	0.692112
YGR267C	150.447	-0.0701602	0.275771	-0.254414	0.799175	0.920614
YGR268C	81.2867	1.02802	0.459628	2.23664	0.0253099	0.16211
YGR270W	124.33	-0.0638829	0.350217	-0.18241	0.855261	0.948134
YGR271W	37.8204	-0.652508	0.383188	-1.70284	0.0885982	0.328972
YGR271C-A	51.1139	0.891316	0.377935	2.35838	0.0183549	0.136217
YGR274C	75.6603	0.26448	0.326077	0.811098	0.417309	0.700878
YGR275W	108.842	0.617777	0.299506	2.06265	0.0391458	0.207819
YGR276C	81.6932	0.292518	0.312321	0.936593	0.348968	0.645372
YAL043C	164.882	0.563458	0.378992	1.48673	0.137087	0.406746
YBR034C	219.084	0.563183	0.27711	2.03235	0.0421185	0.21655
YGR277C	66.7979	0.293061	0.34035	0.861058	0.389206	0.678545
YGR278W	38.6958	-0.102231	0.411762	-0.248277	0.80392	0.923083
YGR279C	950.324	0.230683	0.338379	0.68173	0.49541	0.760634
YGR280C	216.94	1.20141	0.28095	4.27624	1.90078e-05	0.00119206
YGR281W	98.6099	-0.0607336	0.315211	-0.192676	0.847213	0.942961
YGR282C	1555.63	0.511944	0.294793	1.73662	0.0824536	0.314054
YGR283C	36.4626	1.16752	0.381559	3.05987	0.00221433	0.0332557
YGR284C	103.545	-0.924153	0.339162	-2.72481	0.00643384	0.066518
YGR285C	975.579	0.482336	0.26912	1.79227	0.0730891	0.2927
YGR286C	81.6367	0.52294	0.303558	1.7227	0.0849424	0.319767
YBR035C	200.235	0.0682933	0.271878	0.251191	0.801666	0.921844
YGR287C	10.0052	-0.013894	0.601329	-0.0231054	0.981566	0.992875
YGR288W	12.9013	-0.275583	0.55885	-0.493126	0.621924	0.838488
YGR289C	25.2271	-0.358316	0.441683	-0.811252	0.417221	0.700878
YGR292W	66.2232	-2.27119	0.420468	-5.40159	6.60528e-08	1.39616e-05
YGR294W	5.0753	2.10132	0.880002	2.38786	0.0169468	0.129126
YGR295C	102.026	-0.419637	0.308129	-1.36189	0.173234	0.464153
YGR296W	57.571	1.93636	0.48289	4.00995	6.07314e-05	0.00295335
YHL050C	127.639	1.67739	0.490325	3.42098	0.000623951	0.0150249
YHL049C	4.97969	0.397614	0.868509	0.457812	0.647088	0.851145
YHL048W	67.4592	-0.571271	0.348097	-1.64113	0.100771	0.351744
YHL047C	48.468	0.101086	0.410735	0.24611	0.805597	0.924129
YHL046C	1.59971	1.54961	1.51257	1.02448	0.305607	0.607655
YHL044W	16.6902	-0.949776	0.602131	-1.57736	0.114713	0.373242
YHL042W	1.21241	0.991708	1.66109	0.597022	0.550493	0.800484
YHL040C	38.5143	0.438621	0.393932	1.11344	0.265517	0.566908
YHL039W	51.6531	0.0183424	0.376758	0.0486849	0.96117	0.987826
YHL038C	65.2085	0.321167	0.333742	0.962321	0.335888	0.633869
YHL036W	10.1096	-2.65158	0.805709	-3.29099	0.000998363	0.0200622
YHL035C	54.6035	-0.633248	0.358675	-1.76552	0.0774762	0.302433
YHL034C	911.829	0.535744	0.267802	2.00052	0.0454436	0.225519
YHL033C	1886.41	1.05757	0.357662	2.9569	0.0031075	0.0419256
YHL032C	144.467	0.372623	0.365746	1.0188	0.308297	0.610197
YHL031C	273.075	0.762036	0.293671	2.59487	0.00946273	0.0864036
YHL030W	42.7659	-0.743641	0.445598	-1.66886	0.0951452	0.340648
YHL029C	103.497	0.547219	0.369979	1.47905	0.139126	0.410049
YHL028W	83.6169	-0.260931	0.495631	-0.526461	0.598568	0.824844
YHL027W	133.213	0.440376	0.312646	1.40855	0.15897	0.441807
YHL026C	12.8156	-0.336867	0.544212	-0.618999	0.535917	0.789896
YBR036C	177.384	0.0841179	0.284105	0.296081	0.767169	0.906278
YHL025W	164.577	1.20011	0.330565	3.63049	0.000282881	0.00858724
YHL024W	4.05549	-0.126839	0.88425	-0.143442	0.885941	0.961595
YHL023C	52.0692	0.19736	0.382774	0.515605	0.606131	0.82804
YHL022C	1.99202	-0.436529	1.24601	-0.350342	0.726082	0.888113
YHL021C	185.268	-1.36684	0.382284	-3.57546	0.000349607	0.00978043
YHL020C	137.604	1.24876	0.333551	3.74385	0.000181224	0.00637255
YHL019C	67.6375	0.47803	0.331405	1.44243	0.14918	0.426752
YHL018W	6.84746	-0.400582	0.714147	-0.560923	0.57485	0.81187
YHL017W	87.6221	-0.12644	0.342517	-0.369151	0.712016	0.88298
YBR037C	120.752	0.571957	0.328709	1.74001	0.0818575	0.312901
YHL016C	15.5171	0.53567	0.512075	1.04608	0.295525	0.596525
YHL015W	2008.94	-0.273363	0.267336	-1.02254	0.306524	0.608251
YHL014C	30.3879	0.242771	0.420453	0.577403	0.563668	0.808308
YHL013C	56.8694	0.961031	0.337247	2.84964	0.0043769	0.0519313
YHL012W	1.09504	-0.401214	1.78105	-0.225269	0.82177	0.93067
YHL011C	184.224	-0.16064	0.264972	-0.606251	0.544348	0.796854
YHL010C	33.9417	-0.136966	0.384918	-0.355831	0.721967	0.886859
YHL009C	48.6975	-0.305241	0.35395	-0.862384	0.388476	0.678186
YBR038W	62.2598	-0.0387896	0.332151	-0.116783	0.907032	0.971188
YHL009W-B	27.2342	-0.404574	0.492876	-0.820844	0.411735	0.697911
YHL009W-A	1.97976	-1.17982	1.34606	-0.876498	0.380759	0.673797
YHL008C	81.8418	0.359633	0.33273	1.08086	0.279761	0.580251
YHL007C	153.429	0.722868	0.318688	2.26826	0.0233132	0.154035
YHL006C	10.5813	0.706107	0.59823	1.18033	0.23787	0.540201
YHL004W	189.265	0.0329224	0.287361	0.114568	0.908788	0.97151
YHL003C	104.311	-0.542928	0.299731	-1.81138	0.0700816	0.289222
YHL002W	97.3458	0.0536304	0.294018	0.182405	0.855265	0.948134
YHL001W	415.186	0.0686421	0.265663	0.25838	0.796113	0.92052
YHR001W	121.882	-0.19453	0.308808	-0.629939	0.528734	0.786193
YBR039W	824.403	-0.50553	0.326656	-1.54759	0.121721	0.386567
YHR001W-A	215.913	0.365903	0.342826	1.06732	0.28583	0.58721
YHR002W	19.3773	-0.830609	0.518096	-1.60319	0.108892	0.364139
YHR003C	58.2968	0.0237542	0.325509	0.0729756	0.941826	0.979588
YHR004C	58.0786	-0.830142	0.356766	-2.32686	0.019973	0.143476
YHR005C	112.612	-0.36384	0.331584	-1.09728	0.27252	0.574095
YHR005C-A	442.484	0.198632	0.277402	0.716045	0.473963	0.742088
YHR006W	79.1512	0.413622	0.317865	1.30125	0.193173	0.49001
YHR007C	669.358	-0.160351	0.290555	-0.55188	0.581031	0.814527
YHR007C-A	3.78596	-0.679402	1.00485	-0.676121	0.498964	0.764658
YHR008C	609.841	0.0788808	0.289806	0.272185	0.78548	0.915217
YHR009C	197.238	0.0849499	0.289366	0.293573	0.769084	0.906852
YHR010W	1349.72	0.580072	0.294056	1.97266	0.0485348	0.233718
YHR011W	26.5158	0.337979	0.448036	0.754357	0.450635	0.724822
YHR012W	86.9278	0.376064	0.359744	1.04537	0.295854	0.59653
YHR013C	134.072	0.229571	0.301736	0.760833	0.446757	0.722998
YHR015W	1.48396	-1.18182	1.62153	-0.72883	0.466106	0.737993
YBR041W	68.7122	-0.99931	0.336979	-2.9655	0.00302192	0.0413575
YHR016C	110.255	0.218169	0.342517	0.63696	0.524151	0.781842
YHR017W	40.7823	-0.453698	0.388501	-1.16782	0.242881	0.546046
YHR018C	248.822	0.662718	0.328765	2.01578	0.0438227	0.2223
YHR019C	1055.3	0.0171258	0.260861	0.0656513	0.947655	0.982607
YHR020W	215.796	0.157559	0.287879	0.547309	0.584166	0.816308
YHR021C	296.614	-0.545582	0.255724	-2.13348	0.0328853	0.189
YHR021W-A	1.63243	-0.393519	1.38564	-0.283997	0.776413	0.911351
YHR022C	3.4587	-0.679726	1.08568	-0.626082	0.531261	0.787926
YAL042W	775.561	1.12748	0.343679	3.28061	0.00103584	0.0205261
YBR042C	43.9218	-0.669514	0.38556	-1.73647	0.0824803	0.314054
YHR023W	57.5607	-0.0162753	0.425398	-0.038259	0.969481	0.990304
YHR024C	161.066	0.648391	0.298831	2.16976	0.030025	0.179427
YHR025W	289.12	0.166972	0.31588	0.528593	0.597088	0.824844
YHR026W	90.7202	-1.07356	0.37122	-2.89198	0.00382819	0.0478861
YHR027C	462.062	0.437596	0.327643	1.33559	0.181685	0.476161
YHR028C	111.164	-0.591666	0.299489	-1.97558	0.048202	0.232929
YHR029C	18.482	-0.566186	0.489998	-1.15549	0.247891	0.550444
YHR030C	78.9635	0.615081	0.305991	2.01013	0.0444177	0.223933
YHR031C	55.1804	-0.277193	0.35271	-0.785896	0.431929	0.713636
YHR032W	139.871	0.604654	0.32123	1.88231	0.0597939	0.26453
YBR043C	71.4816	-0.0269598	0.317428	-0.0849321	0.932315	0.977918
YHR033W	449.276	0.357392	0.391031	0.913973	0.360731	0.65668
YHR034C	37.8933	0.647015	0.367598	1.76011	0.0783884	0.304743
YHR035W	15.8973	-0.49139	0.521629	-0.942029	0.346178	0.642207
YHR036W	67.7548	0.47934	0.339356	1.4125	0.157803	0.440814
YHR037W	358.976	0.121217	0.257352	0.471016	0.637629	0.847001
YHR038W	15.5683	0.546478	0.543116	1.00619	0.314324	0.616441
YHR039C	141.08	-0.321959	0.305328	-1.05447	0.291667	0.592956
YHR039C-A	400.011	0.242189	0.254178	0.952833	0.340675	0.637573
YHR040W	91.099	1.45164	0.352385	4.11946	3.79757e-05	0.00202549
YHR041C	58.3649	1.06552	0.390119	2.73128	0.00630893	0.0655983
YBR044C	52.8694	0.119368	0.349432	0.341605	0.732648	0.891709
YHR042W	429.619	0.254653	0.343125	0.742158	0.457992	0.730508
YHR043C	191.587	-0.424176	0.283559	-1.4959	0.13468	0.404493
YHR044C	140.554	1.7237	0.440914	3.90938	9.25348e-05	0.00397065
YHR045W	45.4772	-0.511647	0.358547	-1.427	0.153579	0.433741
YHR046C	25.1852	0.8658	0.418358	2.06952	0.0384972	0.205866
YHR047C	174.668	-0.0863785	0.295948	-0.291871	0.770385	0.907824
YHR048W	4.40267	-0.776641	0.909717	-0.853717	0.393262	0.68093
YHR049W	124.452	-0.162903	0.292816	-0.556333	0.577983	0.813577
YHR050W	117.319	0.032149	0.302102	0.106418	0.915251	0.972523
YHR050W-A	217.677	-1.22138	0.415953	-2.93634	0.00332111	0.0437727
YHR051W	293.889	-0.798483	0.378449	-2.10988	0.0348684	0.19452
YHR052W	123.25	0.0210784	0.343014	0.0614504	0.951001	0.983396
YHR053C	5637.14	-5.05649	1.50629	-3.35691	0.000788188	0.0172152
YHR054C	27.419	-1.29971	0.491937	-2.64204	0.00824094	0.0783593
YHR055C	5639.84	-5.05413	1.5067	-3.35444	0.000795269	0.0172152
YHR056C	79.8295	-0.647639	0.323387	-2.00267	0.0452127	0.22491
YHR057C	139.398	1.13523	0.316797	3.58346	0.000339073	0.00957965
YHR058C	36.1115	0.624173	0.387341	1.61143	0.107086	0.361834
YBR045C	8.58682	0.318725	0.683188	0.466526	0.640839	0.848613
YHR059W	82.5449	0.0370837	0.318988	0.116254	0.907451	0.971272
YHR060W	84.1419	-0.0157355	0.384282	-0.0409477	0.967338	0.9895
YHR061C	39.4822	0.033942	0.402023	0.084428	0.932716	0.977918
YHR062C	61.1371	0.701084	0.366909	1.91079	0.0560321	0.254598
YHR063C	97.1926	-0.373572	0.303506	-1.23085	0.218378	0.520232
YHR064C	600.818	0.0956631	0.269853	0.354501	0.722963	0.887488
YHR065C	118.232	0.643043	0.320629	2.00557	0.0449027	0.224692
YHR066W	75.8383	0.399383	0.361515	1.10475	0.269269	0.57073
YHR067W	35.3372	0.019107	0.384509	0.0496919	0.960368	0.98743
YHR068W	371.806	0.127358	0.254971	0.4995	0.617427	0.836775
YBR046C	96.0008	0.0681455	0.307706	0.221463	0.824732	0.932767
YHR069C	85.1522	0.835387	0.354143	2.3589	0.0183291	0.136204
YHR070W	93.0101	1.5782	0.428973	3.67901	0.000234139	0.00753692
YHR071W	52.3583	-0.870821	0.410536	-2.12118	0.0339066	0.191589
YHR072W	85.8592	0.0705467	0.312229	0.225945	0.821244	0.93067
YHR072W-A	232.936	-0.00236651	0.273289	-0.00865937	0.993091	0.99784
YHR073W	173.506	0.0927623	0.294792	0.31467	0.753012	0.901614
YHR074W	96.2788	-1.06344	0.328752	-3.23479	0.00121734	0.0224657
YHR075C	27.0798	-0.90142	0.447343	-2.01505	0.043899	0.2223
YHR076W	62.5147	-0.547	0.350944	-1.55865	0.119079	0.381359
YBR047W	18.7987	0.224216	0.503617	0.445212	0.656167	0.855941
YHR077C	245.955	1.71373	0.348155	4.92232	8.55259e-07	0.000119048
YHR078W	50.0448	-0.594687	0.355216	-1.67416	0.0940999	0.338392
YHR079C	62.6669	-0.383067	0.335848	-1.1406	0.254038	0.556329
YHR080C	90.3819	0.130184	0.31003	0.419908	0.674553	0.865111
YHR081W	151.431	0.693333	0.360071	1.92555	0.0541612	0.249877
YHR082C	196.314	0.127288	0.276078	0.46106	0.644756	0.85067
YHR083W	105.278	-0.36357	0.332297	-1.09411	0.273905	0.574455
YHR084W	78.499	-0.362477	0.316481	-1.14534	0.25207	0.55394
YHR085W	30.156	1.12814	0.45095	2.50169	0.0123601	0.103734
YBR048W	2341.44	0.582957	0.343034	1.69941	0.0892413	0.330714
YHR086W	51.3204	-0.233856	0.360528	-0.648648	0.516566	0.776503
YHR087W	102.891	-2.54151	0.441615	-5.75503	8.6626e-09	2.74653e-06
YHR088W	98.5278	0.19752	0.364697	0.541601	0.588094	0.819492
YHR089C	402.327	0.97592	0.299252	3.2612	0.00110943	0.0214972
YHR090C	46.1982	0.144536	0.361052	0.40032	0.688921	0.871188
YHR091C	56.1581	0.0747587	0.345575	0.216331	0.828729	0.93436
YHR092C	11.1301	2.16177	0.797957	2.70914	0.00674583	0.0686247
YHR094C	1.18586	0.499404	1.73044	0.2886	0.772887	0.909083
YHR096C	2.57143	-0.114518	1.16913	-0.0979515	0.921971	0.975211
YBR049C	152.555	0.651371	0.338651	1.92343	0.0544266	0.250667
YHR097C	109.984	0.0445072	0.315822	0.140925	0.887929	0.962381
YHR098C	136.198	-0.485393	0.306393	-1.58422	0.113145	0.371383
YHR099W	113.697	-0.373215	0.313126	-1.1919	0.2333	0.535374
YHR100C	31.081	0.627568	0.42793	1.46652	0.142507	0.414693
YHR101C	25.9957	-0.0935157	0.430573	-0.217189	0.828061	0.934311
YHR102W	65.9192	0.0239675	0.323551	0.0740764	0.94095	0.979588
YHR103W	62.3817	-0.24815	0.361293	-0.686839	0.492184	0.757791
YHR104W	119.585	-1.15587	0.370224	-3.1221	0.00179568	0.029031
YHR105W	19.4514	0.733097	0.502981	1.4575	0.144977	0.419567
YHR106W	39.7987	-0.862974	0.370837	-2.3271	0.0199601	0.143476
YBR050C	78.5021	-0.177928	0.318857	-0.558019	0.576831	0.813436
YHR107C	244.082	0.639185	0.289545	2.20755	0.0272753	0.17112
YHR108W	312.414	-0.426036	0.275232	-1.54792	0.121643	0.386534
YHR109W	14.7427	-0.566203	0.52286	-1.08289	0.278855	0.579284
YHR110W	147.132	-0.134684	0.301985	-0.445995	0.655601	0.855752
YHR111W	51.3101	0.416667	0.357647	1.16502	0.24401	0.546377
YHR112C	54.8575	-0.585301	0.363838	-1.60868	0.107686	0.363089
YHR113W	93.4378	-0.58916	0.305591	-1.92793	0.0538633	0.249107
YHR114W	116.841	0.34484	0.284611	1.21162	0.225658	0.527312
YHR115C	109.153	0.521524	0.337931	1.54329	0.122761	0.388358
YHR116W	66.1751	1.6786	0.370459	4.53112	5.86723e-06	0.000548923
YAL041W	100.711	0.292747	0.290661	1.00718	0.31385	0.616106
YBR052C	287.647	-0.767545	0.298688	-2.56972	0.0101781	0.0910443
YHR117W	156.626	-0.2085	0.27736	-0.751731	0.452213	0.72657
YHR118C	33.8145	0.199748	0.379818	0.525903	0.598955	0.824844
YHR119W	83.5474	0.037384	0.318343	0.117433	0.906517	0.971183
YHR120W	31.4244	0.194529	0.390637	0.497978	0.6185	0.836874
YHR121W	103.547	-0.0321604	0.300475	-0.107032	0.914764	0.972523
YHR122W	29.5596	0.0311594	0.407986	0.0763738	0.939122	0.979274
YHR123W	57.6893	-0.956843	0.368899	-2.59378	0.00949274	0.0864036
YHR124W	4.50157	-0.606647	0.874247	-0.693909	0.487739	0.754331
YBR053C	89.0229	-1.35873	0.331884	-4.09399	4.24004e-05	0.00224055
YHR127W	48.1451	0.340381	0.373576	0.911144	0.36222	0.657731
YHR128W	78.6366	-0.490348	0.328168	-1.4942	0.135124	0.405196
YHR129C	43.5884	1.02468	0.362717	2.82502	0.00472778	0.0541216
YHR131C	144.547	2.02733	0.470407	4.30975	1.63443e-05	0.00107215
YHR132C	212.408	-0.102249	0.283553	-0.360598	0.7184	0.885509
YHR132W-A	81.3621	-0.407777	0.342047	-1.19217	0.233196	0.535374
YHR133C	85.0733	-0.63622	0.310804	-2.04702	0.0406566	0.211704
YHR134W	25.8342	0.177653	0.424566	0.418435	0.675629	0.865503
YHR135C	378.364	0.401914	0.305367	1.31617	0.188119	0.484629
YHR136C	270.374	-0.105337	0.297393	-0.354201	0.723188	0.887488
YBR054W	13.3373	-3.07447	0.799714	-3.84446	0.000120818	0.00478825
YHR137W	44.7309	-0.677915	0.364048	-1.86216	0.0625805	0.272631
YHR138C	72.9471	0.257637	0.361159	0.713362	0.475622	0.744276
YHR139C	2.21953	-0.0106335	1.20962	-0.00879082	0.992986	0.99784
YHR140W	6.69399	0.172666	0.833041	0.207272	0.835797	0.935611
YHR141C	1517.81	0.6186	0.281176	2.20005	0.0278034	0.172285
YHR142W	38.2858	-0.545758	0.419263	-1.30171	0.193016	0.49001
YHR143W	379.462	0.52706	0.320428	1.64486	0.0999986	0.349689
YHR143W-A	131.966	0.251422	0.309965	0.811131	0.417291	0.700878
YHR144C	38.5068	0.239137	0.385835	0.619789	0.535397	0.789741
YBR055C	63.1563	-0.17941	0.342366	-0.52403	0.600258	0.825723
YHR146W	264.745	-0.29017	0.30562	-0.949448	0.342393	0.638782
YHR147C	86.8681	-0.133088	0.31061	-0.428474	0.668306	0.860758
YHR148W	35.0659	0.504659	0.379717	1.32904	0.183835	0.478379
YHR149C	137.301	0.550016	0.306773	1.79291	0.072987	0.2927
YHR150W	23.3907	-0.539144	0.449567	-1.19925	0.23043	0.531605
YHR151C	32.4561	-0.719895	0.40104	-1.79507	0.0726428	0.2927
YHR152W	184.347	0.491344	0.281048	1.74826	0.0804198	0.309896
YHR153C	6.67181	-0.470284	0.714932	-0.657803	0.510664	0.773315
YHR154W	73.0986	-0.164279	0.403819	-0.406813	0.684145	0.869194
YHR155W	52.4475	-0.446722	0.36317	-1.23006	0.218673	0.520263
YHR156C	11.5595	0.273654	0.588035	0.465371	0.641666	0.849058
YHR157W	3.2929	-0.136763	1.0135	-0.13494	0.892659	0.963937
YHR158C	75.0114	0.176211	0.343043	0.51367	0.607483	0.829403
YHR159W	29.0852	0.243738	0.400459	0.608648	0.542758	0.795664
YHR160C	1.06762	0.829963	1.67873	0.494399	0.621025	0.83787
YHR161C	231.612	0.711215	0.288142	2.46828	0.0135764	0.111323
YHR162W	98.565	-1.26654	0.371873	-3.40583	0.000659632	0.0157391
YHR163W	101.714	-0.0259808	0.320717	-0.0810085	0.935435	0.978226
YBR056W	101.306	-1.14496	0.389496	-2.9396	0.00328641	0.0436176
YHR164C	28.5207	-0.0495248	0.425599	-0.116365	0.907363	0.971272
YHR165C	95.0732	0.0184567	0.334104	0.0552424	0.955945	0.986007
YHR166C	29.02	0.303772	0.396513	0.766108	0.443612	0.721132
YHR167W	27.1839	0.0630947	0.434454	0.145228	0.884531	0.961318
YHR168W	24.0431	0.0998796	0.436688	0.228721	0.819086	0.929694
YHR169W	73.4544	0.973892	0.325939	2.98796	0.00280851	0.0398341
YHR170W	384.815	0.304663	0.299583	1.01696	0.309174	0.611014
YHR171W	17.1227	-0.710207	0.48622	-1.46067	0.144106	0.418107
YHR172W	26.4777	0.335388	0.443538	0.756166	0.44955	0.724151
YHR174W	4737.88	-0.562555	0.331234	-1.69836	0.0894394	0.331165
YHR175W	103.746	0.467113	0.314805	1.48382	0.137857	0.40815
YHR175W-A	18.2657	-0.408807	0.536148	-0.762489	0.445768	0.722727
YHR176W	25.582	-0.0938548	0.440902	-0.21287	0.831428	0.934928
YHR177W	5.41415	1.46507	0.829526	1.76615	0.0773702	0.302433
YHR178W	29.9907	0.217434	0.397423	0.54711	0.584303	0.816308
YHR179W	530.333	-0.471309	0.285609	-1.65019	0.0989042	0.347156
YHR181W	31.5748	-0.814606	0.422292	-1.92901	0.0537296	0.249094
YHR182W	35.0158	-0.088625	0.388543	-0.228096	0.819572	0.92988
YBR056W-A	2.27908	0.20761	1.25085	0.165975	0.868176	0.953236
YHR183W	564.111	0.373357	0.280762	1.3298	0.183585	0.477974
YHR184W	1.89061	0.988527	1.35162	0.731366	0.464555	0.736449
YHR186C	50.3606	0.0745636	0.355059	0.210004	0.833665	0.935351
YHR187W	73.5028	0.0223838	0.327597	0.0683274	0.945525	0.98129
YHR188C	294.838	-0.175249	0.294745	-0.59458	0.552124	0.800959
YHR189W	33.7716	0.837896	0.434802	1.92708	0.0539701	0.249197
YHR190W	377.285	-0.421622	0.274564	-1.53561	0.124635	0.39178
YHR191C	74.9371	1.26658	0.378925	3.34255	0.000830129	0.0178103
YBR057C	81.5165	-0.0372774	0.308571	-0.120807	0.903844	0.969621
YHR192W	56.9211	-0.350234	0.332707	-1.05268	0.292487	0.593395
YHR193C	1224.74	0.819673	0.31628	2.59161	0.00955283	0.086644
YHR194W	48.9075	0.0866911	0.354165	0.244776	0.80663	0.924385
YHR195W	103.806	0.412316	0.297986	1.38367	0.166458	0.453882
YHR196W	84.764	0.104413	0.37418	0.279044	0.780211	0.913367
YHR197W	58.9588	0.348734	0.407414	0.85597	0.392014	0.680215
YHR198C	75.5063	-0.241331	0.349553	-0.6904	0.489943	0.755908
YHR199C	77.4533	-0.334152	0.334034	-1.00036	0.317138	0.618138
YHR199C-A	46.8353	1.37173	0.519097	2.64253	0.008229	0.0783593
YHR200W	272.65	0.513425	0.288601	1.77901	0.0752377	0.296512
YBR058C	88.2335	-0.0420703	0.305786	-0.137581	0.890572	0.963319
YHR201C	87.5527	0.305011	0.319711	0.954021	0.340073	0.637573
YHR202W	25.3794	-1.02193	0.499084	-2.0476	0.0405989	0.211704
YHR203C	2014.95	0.509296	0.337392	1.50951	0.131169	0.399883
YHR204W	79.8755	-0.662266	0.32259	-2.05296	0.040076	0.210796
YHR205W	161.659	0.571905	0.344275	1.66119	0.096676	0.343116
YHR206W	110.418	0.342147	0.345081	0.991498	0.321442	0.622488
YHR207C	40.2678	0.0191201	0.384367	0.0497442	0.960326	0.98743
YHR208W	160.692	-0.158496	0.282368	-0.561308	0.574588	0.81187
YHR209W	12.067	-0.564819	0.613798	-0.920204	0.357466	0.654642
YHR210C	5.21284	0.203559	0.786329	0.258872	0.795734	0.9204
YAL040C	133.212	-0.258426	0.315418	-0.819314	0.412608	0.697911
YBR058C-A	131.531	0.761279	0.347876	2.18836	0.0286431	0.1751
YHR211W	78.6008	1.36372	0.467523	2.91689	0.00353538	0.045654
YHR214W	16.8381	1.05881	0.531843	1.99084	0.0464987	0.22798
YHR214C-B	574.708	0.683945	0.368169	1.85769	0.063213	0.274054
YHR214C-C	199.859	0.968972	0.388448	2.49447	0.0126146	0.105123
YBR059C	152.046	-0.102858	0.295156	-0.348488	0.727474	0.889029
YHR215W	227.325	-1.70898	0.351978	-4.85536	1.20166e-06	0.000159486
YHR216W	60.41	-0.435576	0.33839	-1.2872	0.198023	0.496561
YHR218W	15.9069	0.760985	0.555332	1.37032	0.170586	0.461095
YHR219W	72.5447	1.22934	0.39044	3.1486	0.00164057	0.0276187
YIL177C	425.885	1.88767	0.421472	4.47876	7.50794e-06	0.000659197
YIL176C	1.13359	2.85583	1.87645	1.52193	0.128026	0.395882
YIL173W	31.3014	-0.806186	0.402071	-2.00508	0.0449544	0.224692
YIL172C	20.9734	0.420063	0.468753	0.896127	0.370185	0.664563
YBR060C	60.5759	-0.00964635	0.337471	-0.0285843	0.977196	0.991804
YIL169C	9.18322	4.99605	1.22628	4.07416	4.61802e-05	0.00239591
YIL167W	8.60395	-0.133515	0.647125	-0.20632	0.836541	0.935922
YIL166C	9.21846	-0.189008	0.653082	-0.289409	0.772269	0.908878
YIL165C	12.3702	0.24415	0.54509	0.447907	0.65422	0.855618
YIL164C	34.5277	0.919031	0.443671	2.07142	0.0383192	0.205148
YIL162W	121.656	-1.16895	0.390251	-2.99538	0.00274105	0.039206
YIL161W	29.2915	0.0813699	0.431779	0.188453	0.850522	0.944627
YBR061C	49.588	0.10856	0.348523	0.311486	0.755431	0.901614
YIL160C	6.8878	3.12793	0.936558	3.33981	0.000838358	0.0179195
YIL159W	30.9451	0.403488	0.444448	0.90784	0.363963	0.658773
YIL158W	103.67	0.240099	0.303324	0.791557	0.428619	0.710464
YIL157C	183.654	0.736978	0.338248	2.17881	0.0293459	0.176919
YIL156W-B	56.1817	-0.326852	0.365252	-0.894868	0.370858	0.665562
YIL156W	46.2252	0.248878	0.356005	0.699085	0.484499	0.751572
YIL155C	259.251	0.737357	0.381732	1.93161	0.0534076	0.248814
YIL154C	136.472	1.57468	0.379414	4.1503	3.32046e-05	0.00178772
YIL153W	120.218	0.88674	0.426068	2.08121	0.0374142	0.202811
YIL152W	40.9353	0.499191	0.364462	1.36967	0.170791	0.461095
YBR062C	46.5534	-0.12356	0.3681	-0.335671	0.737119	0.894617
YIL151C	111.039	0.278254	0.290953	0.956355	0.338893	0.636833
YIL150C	8.7355	0.609313	0.67547	0.902058	0.367026	0.66088
YIL149C	90.6509	0.222776	0.392291	0.567885	0.570113	0.811072
YIL148W	1881.55	-0.411102	0.262435	-1.56649	0.117234	0.378045
YIL147C	102.422	0.313812	0.315182	0.995653	0.319419	0.620253
YIL146C	16.9358	0.0870493	0.485526	0.179289	0.857711	0.94834
YIL145C	94.7297	-0.239637	0.315011	-0.760724	0.446822	0.722998
YIL144W	48.1077	0.30195	0.353549	0.854054	0.393075	0.68093
YIL143C	98.5786	0.345535	0.308926	1.1185	0.263352	0.565444
YIL142W	302.905	0.424015	0.287528	1.47469	0.140296	0.41166
YBR063C	15.897	-0.488442	0.513802	-0.950643	0.341785	0.63852
YIL140W	95.3028	-0.181584	0.296047	-0.613362	0.539637	0.793126
YIL139C	17.4225	0.319188	0.57803	0.5522	0.580812	0.814509
YIL138C	149.103	0.13822	0.291404	0.474326	0.635268	0.845493
YIL137C	115.437	-0.526414	0.293069	-1.79621	0.0724611	0.2927
YIL136W	289.006	-0.0434471	0.382418	-0.113612	0.909546	0.97151
YIL135C	172.006	0.558116	0.378513	1.4745	0.140348	0.41166
YIL134W	25.7803	0.223354	0.414406	0.538975	0.589904	0.820068
YIL133C	613.017	-0.101635	0.248779	-0.408534	0.682882	0.868287
YBR065C	18.5882	-0.0964382	0.476838	-0.202245	0.839725	0.938013
YIL132C	15.5412	0.0462684	0.511567	0.0904444	0.927934	0.97707
YIL131C	103.573	0.488746	0.301791	1.61948	0.105343	0.358338
YIL130W	97.2463	-0.438704	0.311086	-1.41023	0.158471	0.441167
YIL129C	63.6022	-0.082632	0.322286	-0.256393	0.797647	0.920614
YIL128W	40.1531	-0.941917	0.385103	-2.44588	0.0144498	0.116476
YIL127C	116.435	1.15937	0.330693	3.50587	0.000455115	0.0121941
YIL126W	161.326	0.0904416	0.317663	0.284709	0.775867	0.911085
YIL125W	423.643	-0.41955	0.300147	-1.39781	0.162169	0.447212
YIL124W	210.785	-1.16861	0.320452	-3.64676	0.00026557	0.00828201
YIL123W	326.401	0.561141	0.391462	1.43345	0.15173	0.430378
YBR066C	54.1172	-0.494166	0.414513	-1.19216	0.233198	0.535374
YIL122W	31.6085	0.713899	0.394369	1.81023	0.0702598	0.289621
YIL121W	77.692	-0.0966094	0.342571	-0.282013	0.777934	0.912234
YIL120W	14.2544	-1.63184	0.60457	-2.69917	0.00695117	0.0698326
YIL119C	39.2386	-0.631217	0.462016	-1.36622	0.171869	0.462154
YIL118W	174.498	0.0632479	0.273053	0.231632	0.816824	0.92908
YIL117C	42.7477	0.831904	0.365102	2.27855	0.0226936	0.15273
YIL116W	60.4329	-0.316875	0.392945	-0.806412	0.420005	0.703354
YIL115C	115.955	-0.026762	0.337007	-0.0794107	0.936706	0.978226
YIL114C	29.8691	0.447153	0.398183	1.12298	0.261445	0.563547
YIL113W	20.6514	0.604607	0.496794	1.21702	0.223597	0.526215
YBR067C	944.669	-0.449569	0.916165	-0.490708	0.623633	0.839302
YIL112W	63.8372	0.0186042	0.384147	0.0484299	0.961374	0.987857
YIL111W	111.451	-0.870928	0.404766	-2.15168	0.0314225	0.18355
YIL110W	41.4732	-0.000619903	0.363042	-0.00170752	0.998638	0.999586
YIL109C	285.749	0.0828495	0.320984	0.258111	0.796321	0.92052
YIL108W	48.9317	0.34763	0.366283	0.949073	0.342583	0.638929
YIL107C	63.591	-0.0654799	0.322475	-0.203054	0.839093	0.937679
YIL106W	66.1057	-0.191694	0.320564	-0.597991	0.549846	0.800484
YIL105C	85.243	0.389934	0.340161	1.14632	0.251662	0.55394
YIL104C	29.1852	0.607539	0.414224	1.46669	0.14246	0.414693
YBR068C	211.246	0.437665	0.298415	1.46663	0.142476	0.414693
YIL103W	30.8832	0.0419804	0.406519	0.103268	0.91775	0.972523
YIL102C-A	10.6359	0.922601	0.610885	1.51027	0.130974	0.399717
YIL101C	72.4204	0.239801	0.426559	0.562177	0.573995	0.81187
YIL099W	6.10687	0.579264	0.765638	0.756577	0.449303	0.724151
YIL098C	73.8641	0.750702	0.311416	2.41061	0.0159259	0.123038
YIL097W	32.0481	-0.608055	0.439325	-1.38406	0.166339	0.453774
YIL096C	42.0832	0.350346	0.397564	0.881233	0.378192	0.67238
YAL039C	178.312	1.72284	0.351735	4.89811	9.67621e-07	0.000131481
YBR069C	220.488	-0.288827	0.311818	-0.926267	0.354307	0.651047
YIL095W	27.0145	-0.533014	0.44226	-1.20521	0.228124	0.529649
YIL094C	315.71	0.529849	0.265527	1.99546	0.0459928	0.226669
YIL093C	152.542	0.863407	0.274421	3.14629	0.00165359	0.0277559
YIL092W	21.9275	-0.0213142	0.457817	-0.0465562	0.962867	0.987955
YIL091C	114.327	0.757221	0.351055	2.15699	0.0310067	0.182053
YIL090W	55.1768	-0.340307	0.347001	-0.980709	0.326736	0.626785
YIL089W	5.15862	-0.146716	0.803328	-0.182635	0.855085	0.948134
YIL088C	134.855	0.0270725	0.306875	0.0882201	0.929702	0.977708
YIL087C	100.004	0.411975	0.408873	1.00759	0.313653	0.615973
YBR070C	38.2246	1.00303	0.429894	2.33321	0.019637	0.142545
YIL085C	129.452	-0.0609457	0.279043	-0.21841	0.82711	0.933564
YIL084C	41.9695	0.369595	0.35936	1.02848	0.303724	0.606067
YIL083C	180.222	0.211788	0.308382	0.686773	0.492226	0.757791
YIL082W-A	107.76	-1.01122	0.298058	-3.39269	0.000692092	0.0161215
YIL079C	62.5994	1.24074	0.330352	3.75582	0.000172774	0.00616262
YIL078W	582.144	-0.288143	0.267801	-1.07596	0.281945	0.582637
YIL077C	59.083	0.146987	0.330938	0.444152	0.656933	0.856549
YIL076W	142.161	-0.840817	0.289693	-2.90244	0.00370264	0.0468035
YIL075C	439.797	0.426362	0.263024	1.621	0.105017	0.358293
YBR071W	123.922	-0.0811697	0.331262	-0.245032	0.806432	0.924385
YIL074C	145.197	-0.508415	0.31392	-1.61957	0.105325	0.358338
YIL073C	1.58607	1.1422	1.50229	0.760311	0.447069	0.723192
YIL072W	2.47153	-1.53915	1.25481	-1.22661	0.219971	0.522116
YIL071C	38.8459	0.0359705	0.374413	0.0960718	0.923464	0.975242
YIL070C	233.635	0.45623	0.268793	1.69733	0.0896348	0.331244
YIL069C	657.072	0.736427	0.302627	2.43345	0.0149559	0.118874
YIL068C	54.6505	-0.494621	0.402552	-1.22871	0.219179	0.520972
YIL067C	40.4777	0.159298	0.387451	0.411145	0.680966	0.867518
YIL066C	10.09	-0.06482	0.603074	-0.107483	0.914406	0.972523
YIL065C	158.128	0.380628	0.285404	1.33365	0.18232	0.476638
YBR072W	103.297	-3.95984	1.35359	-2.92543	0.00343983	0.0448199
YIL064W	67.3507	0.680171	0.352904	1.92736	0.0539353	0.249197
YIL063C	126.51	0.387915	0.303715	1.27723	0.20152	0.500032
YIL062C	128.018	0.115058	0.306567	0.375311	0.707429	0.880161
YIL061C	39.4964	0.552145	0.387605	1.4245	0.154301	0.434648
YIL057C	79.5665	2.7247	0.459055	5.93545	2.93043e-09	1.31852e-06
YIL056W	87.0652	0.703946	0.370398	1.90051	0.0573663	0.258682
YIL055C	28.209	0.0122822	0.426651	0.0287875	0.977034	0.991804
YBR072C-A	1.59669	-1.04044	1.44309	-0.720979	0.470923	0.740791
YIL053W	590.764	0.0521777	0.311391	0.167563	0.866927	0.952551
YIL052C	821.463	0.113697	0.247395	0.459576	0.645821	0.851145
YIL051C	466.807	-1.69226	0.339125	-4.99008	6.03542e-07	9.06425e-05
YIL050W	88.0947	-0.262775	0.329843	-0.796667	0.425644	0.709026
YIL049W	20.9455	-1.30547	0.513259	-2.5435	0.0109748	0.0951585
YIL048W	49.6232	-0.715776	0.34411	-2.08008	0.0375185	0.202956
YIL047C	112.504	0.381705	0.356417	1.07095	0.284191	0.584883
YIL046W	98.8912	1.19399	0.396904	3.00826	0.0026275	0.0379624
YIL045W	88.0319	-1.35429	0.377506	-3.58745	0.000333924	0.00952852
YBR073W	91.1548	-0.114626	0.331006	-0.346297	0.729119	0.889691
YIL044C	115.892	0.104611	0.318014	0.328953	0.742191	0.897215
YIL043C	466.67	0.351628	0.3122	1.12629	0.260043	0.562221
YIL042C	103.769	1.00392	0.377428	2.65991	0.00781611	0.0758615
YIL041W	552.991	-0.330966	0.267002	-1.23957	0.215135	0.51609
YIL040W	38.109	-0.408554	0.446226	-0.915575	0.35989	0.655985
YIL039W	131.629	-0.596585	0.294901	-2.023	0.043073	0.220267
YIL038C	74.0516	0.520108	0.353359	1.4719	0.141049	0.41344
YIL037C	0.903244	-0.602054	1.86427	-0.322944	0.746738	0.8987
YIL036W	105.481	0.0306825	0.316052	0.0970807	0.922662	0.975242
YIL035C	92.1835	-0.420727	0.344796	-1.22022	0.222382	0.524869
YBR074W	108.938	-0.131396	0.305208	-0.430512	0.666824	0.860102
YIL034C	274.769	-0.524041	0.299688	-1.74862	0.0803566	0.309862
YIL033C	340.3	-0.124878	0.301617	-0.414027	0.678854	0.866962
YIL031W	34.145	0.000204987	0.395534	0.000518254	0.999586	0.999586
YIL030C	124.962	0.186556	0.339537	0.549444	0.582701	0.815667
YIL029C	4.42992	-1.42928	0.969005	-1.475	0.140213	0.41166
YIL027C	69.1348	-0.416555	0.384638	-1.08298	0.278818	0.579284
YIL026C	93.0886	0.534694	0.333973	1.60101	0.109374	0.364178
YIL024C	44.849	0.614098	0.414228	1.48251	0.138204	0.408354
YIL023C	75.2833	0.719745	0.38039	1.89212	0.0584746	0.261737
YBR076W	0.740713	-2.68414	2.17822	-1.23226	0.217852	0.519332
YIL022W	225.222	0.581722	0.289675	2.00819	0.0446234	0.224375
YIL021W	159.775	0.0695838	0.275095	0.252945	0.800311	0.920842
YIL020C	29.5976	0.428849	0.454898	0.942736	0.345816	0.642021
YIL019W	58.4004	1.06198	0.394197	2.69403	0.00705933	0.0705308
YIL018W	1593.86	0.200516	0.277103	0.723615	0.469302	0.740329
YIL017C	78.0143	0.0984695	0.311199	0.31642	0.751684	0.900285
YIL016W	145.783	0.839111	0.289141	2.90208	0.00370689	0.0468035
YIL015W	115.028	-1.87777	0.306104	-6.1344	8.54794e-10	5.42034e-07
YIL014C-A	11.7822	-0.641912	0.603311	-1.06398	0.287337	0.588537
YBR077C	60.9759	-0.255004	0.346283	-0.736403	0.461486	0.734052
YIL014W	84.3355	-0.297648	0.303923	-0.979354	0.327405	0.627562
YIL013C	12.093	-0.138409	0.605685	-0.228516	0.819245	0.929694
YIL011W	73.5905	0.577771	0.508885	1.13537	0.256222	0.559608
YIL010W	66.568	-0.249857	0.315592	-0.79171	0.42853	0.710464
YIL009C-A	18.3628	-0.167818	0.47695	-0.351857	0.724945	0.888113
YIL009W	54.7703	-0.128491	0.333207	-0.385617	0.69978	0.875967
YIL008W	111.304	0.764168	0.31504	2.42562	0.0152823	0.120298
YIL007C	52.3901	0.858705	0.393943	2.17977	0.0292748	0.176795
YBR078W	983.492	-0.305931	0.270343	-1.13164	0.257786	0.560476
YIL006W	53.2984	0.406451	0.396916	1.02402	0.305824	0.607655
YIL005W	98.725	-0.212338	0.316979	-0.66988	0.502934	0.767856
YIL004C	113.45	1.07006	0.318028	3.36467	0.000766352	0.0171513
YIL003W	26.0259	0.238986	0.459373	0.520244	0.602893	0.82709
YIL002W-A	97.2425	-0.0479602	0.33731	-0.142184	0.886934	0.962049
YIL002C	63.1323	-0.0128774	0.332759	-0.0386989	0.96913	0.990123
YIL001W	16.056	-0.687594	0.51135	-1.34466	0.178734	0.471692
YIR001C	82.5963	0.0925118	0.310232	0.298202	0.765549	0.90535
[truncated: 3,709 more rows]

## Sheet: DGY1734
gene	baseMean	log2FoldChange	lfcSE	stat	pvalue	padj
YAL068C	1.29163	1.03395	1.64203	0.629679	0.528905	0.982052
YAL061W	69.883	-1.23349	0.399069	-3.09091	0.00199541	0.157152
YAR071W	360.636	0.50329	0.373173	1.34868	0.177441	0.865801
YDR058C	26.328	0.0124396	0.490322	0.0253703	0.97976	0.999774
YDR059C	53.1417	-0.207633	0.419083	-0.495447	0.620285	0.991182
YDR060W	234.741	0.369845	0.371971	0.994284	0.320085	0.957814
YDR061W	90.3768	0.0441543	0.293736	0.15032	0.880512	0.995016
YDR062W	200.167	-0.231861	0.292389	-0.792989	0.427784	0.963011
YDR063W	248.925	-0.285053	0.338206	-0.842838	0.399319	0.963011
YDR064W	1586.55	-0.27533	0.324642	-0.848102	0.396381	0.963011
YDR065W	14.1762	-0.623751	0.57647	-1.08202	0.279245	0.938169
YBL113C	304.311	1.9346	0.911922	2.12145	0.0338836	0.565827
YDR066C	8.6793	-1.12633	0.651223	-1.72956	0.0837091	0.778659
YDR067C	55.2975	-0.0663091	0.351296	-0.188756	0.850284	0.995016
YDR068W	109.626	0.838626	0.323242	2.59443	0.00947492	0.358059
YDR069C	40.198	-0.205778	0.373785	-0.550524	0.58196	0.991182
YDR070C	189.114	-2.19196	1.13404	-1.93288	0.0532507	0.687932
YDR071C	358.127	-0.113463	0.302416	-0.375188	0.707521	0.995016
YDR072C	127.721	-0.0519692	0.282019	-0.184276	0.853797	0.995016
YDR073W	89.4249	0.521927	0.304439	1.71439	0.086457	0.788531
YDR074W	331.173	-1.44549	0.402094	-3.59491	0.000324503	0.0540344
YDR075W	49.6607	0.590275	0.365377	1.61552	0.106197	0.803521
YBL112C	30.726	1.33094	0.547661	2.43022	0.0150896	0.433158
YDR076W	13.7316	0.590195	0.532873	1.10757	0.268047	0.931903
YDR077W	9098.36	-0.25078	0.486499	-0.515479	0.606219	0.991182
YDR078C	36.9979	-0.194697	0.444303	-0.438207	0.661236	0.995016
YDR079W	44.2571	0.324375	0.50109	0.647338	0.517413	0.980324
YDR079C-A	30.0306	0.413695	0.498754	0.829457	0.406846	0.963011
YDR080W	40.8762	0.130277	0.356455	0.36548	0.714753	0.995016
YDR081C	70.7348	-0.151668	0.324541	-0.467332	0.640263	0.993441
YDR082W	27.9644	0.47208	0.404409	1.16733	0.243076	0.916323
YDR083W	86.7657	0.0406086	0.318584	0.127466	0.898572	0.995682
YDR084C	90.1049	-0.181616	0.409073	-0.44397	0.657065	0.995016
YBL111C	37.0606	1.13437	0.552028	2.05492	0.0398871	0.601165
YDR085C	45.3245	-0.814992	0.393768	-2.06972	0.0384781	0.590879
YDR086C	326.869	0.269279	0.266625	1.00995	0.312518	0.951932
YDR087C	143.076	0.498283	0.391326	1.27332	0.202905	0.885602
YDR088C	61.4806	0.565063	0.344743	1.63908	0.101196	0.797358
YDR089W	59.2067	-0.476357	0.506404	-0.940665	0.346876	0.960815
YDR090C	39.2018	0.209199	0.38245	0.546997	0.584381	0.991182
YDR091C	154.508	-0.505677	0.314953	-1.60556	0.10837	0.803521
YDR092W	153.014	-0.0915533	0.273533	-0.334707	0.737846	0.995016
YDR093W	178.974	0.407971	0.298377	1.3673	0.171531	0.861043
YBL108C-A	0.94962	-0.856408	1.77632	-0.482124	0.629718	0.991182
YDR096W	77.2655	-0.798299	0.32506	-2.45585	0.0140551	0.425494
YDR097C	66.2324	0.151585	0.383051	0.395732	0.692303	0.995016
YDR098C	171.42	0.201919	0.277242	0.728316	0.46642	0.967121
YDR098C-B	556.704	1.15298	0.29977	3.84623	0.000119949	0.025954
YDR098C-A	212.131	0.90735	0.389378	2.33026	0.0197926	0.460371
YDR099W	792.235	-0.149535	0.276617	-0.540586	0.588793	0.991182
YDR100W	60.352	-0.347392	0.531712	-0.653347	0.513533	0.979757
YDR101C	98.7539	-0.000713808	0.330986	-0.00215661	0.998279	0.999774
YDR103W	64.8831	-0.220591	0.348461	-0.633044	0.526705	0.982052
YDR104C	29.9777	0.224593	0.429739	0.522627	0.601234	0.991182
YDR105C	88.9429	-0.253926	0.343128	-0.740031	0.459281	0.966149
YDR106W	3.1442	0.368161	0.998706	0.368639	0.712397	0.995016
YDR107C	42.2924	-0.321681	0.392804	-0.818935	0.412823	0.963011
YDR108W	41.8031	-0.180637	0.389648	-0.463591	0.642941	0.993442
YDR109C	27.1354	0.2266	0.423349	0.535256	0.592473	0.991182
YDR110W	57.7961	0.729188	0.437848	1.66539	0.095835	0.797358
YDR111C	47.1235	-0.243053	0.359787	-0.675545	0.499329	0.978991
YDR113C	99.3754	0.440051	0.327369	1.3442	0.178883	0.866193
YBL107C	75.3599	0.435403	0.335741	1.29684	0.194686	0.878693
YDR115W	138.474	-0.105099	0.296704	-0.354221	0.723173	0.995016
YDR116C	149.704	0.122595	0.30182	0.406186	0.684606	0.995016
YDR117C	98.2601	-0.179318	0.301765	-0.594232	0.552357	0.985673
YDR118W	24.2921	-0.319854	0.430666	-0.742696	0.457666	0.966149
YDR119W	146.058	-0.219906	0.294164	-0.747563	0.454724	0.966149
YDR119W-A	89.3355	-1.03535	1.0276	-1.00755	0.313672	0.953125
YDR120C	151.697	0.663374	0.395021	1.67934	0.0930858	0.795867
YDR121W	94.8476	0.5459	0.349803	1.56059	0.11862	0.817319
YDR122W	145.737	-0.0675407	0.290907	-0.232173	0.816404	0.995016
YBL106C	41.7604	0.787969	0.443322	1.77742	0.0754991	0.75924
YDR123C	47.6875	0.680982	0.492393	1.383	0.166664	0.859335
YDR124W	5.02174	0.238099	0.80792	0.294707	0.768218	0.995016
YDR125C	18.4332	-0.488643	0.494445	-0.988265	0.323023	0.960815
YDR126W	30.8977	-0.172432	0.411532	-0.419	0.675216	0.995016
YDR127W	160.638	-0.0940811	0.30478	-0.308685	0.757561	0.995016
YDR128W	72.8284	0.2717	0.351679	0.772578	0.439772	0.963011
YDR129C	355.02	-0.162972	0.27702	-0.588304	0.556328	0.985673
YDR130C	57.7293	0.25112	0.325082	0.772481	0.43983	0.963011
YDR131C	24.2356	-0.194289	0.455732	-0.426323	0.669873	0.995016
YDR132C	21.2715	-0.125678	0.439451	-0.28599	0.774886	0.995016
YBL105C	147.723	-0.213624	0.312794	-0.682953	0.494637	0.977176
YDR134C	1190.99	-0.802838	0.374264	-2.14511	0.0319438	0.55428
YDR135C	144.831	0.0569202	0.294874	0.193032	0.846934	0.995016
YDR137W	37.5837	-0.383207	0.412911	-0.928062	0.353375	0.960971
YDR138W	66.5776	0.0382759	0.315656	0.121258	0.903487	0.997203
YDR139C	169.441	0.318231	0.284305	1.11933	0.262999	0.929796
YDR140W	34.7754	-0.312499	0.391185	-0.798853	0.424376	0.963011
YDR141C	86.8378	-0.569018	0.337527	-1.68584	0.0918261	0.792833
YDR142C	35.7191	-0.30257	0.38123	-0.793666	0.42739	0.963011
YDR143C	132.277	0.210228	0.328376	0.640205	0.522039	0.981765
YDR144C	104.253	0.295051	0.348998	0.845423	0.397874	0.963011
YBL104C	46.0663	0.168239	0.366672	0.458826	0.646359	0.995016
YDR145W	159.224	0.482208	0.32429	1.48697	0.137024	0.826612
YDR146C	99.5337	-0.239206	0.317339	-0.753788	0.450977	0.966149
YDR147W	58.2411	-0.28289	0.324467	-0.871861	0.383284	0.963011
YDR148C	435.993	-0.977864	0.317038	-3.08438	0.00203977	0.158504
YDR150W	326.765	-0.048398	0.334004	-0.144902	0.884788	0.995016
YDR151C	59.8821	0.07013	0.333992	0.209975	0.833687	0.995016
YDR152W	273.986	0.509495	0.329471	1.5464	0.122007	0.818247
YDR153C	145.958	0.294453	0.288213	1.02165	0.306946	0.946855
YDR155C	1882.51	-0.35567	0.342781	-1.0376	0.299456	0.946855
YDR156W	70.6262	0.216217	0.326186	0.662862	0.507419	0.979518
YAL060W	231.828	0.280471	0.356386	0.786989	0.431289	0.963011
YBL103C	82.461	0.222604	0.336422	0.661682	0.508175	0.979518
YDR158W	690.196	-0.37527	0.359014	-1.04528	0.295894	0.946855
YDR159W	84.66	-0.170459	0.31169	-0.546887	0.584456	0.991182
YDR160W	57.6808	0.0282429	0.330227	0.0855259	0.931843	0.997602
YDR161W	70.1284	0.616033	0.331296	1.85946	0.0629619	0.722327
YDR162C	79.6866	0.212398	0.338037	0.628327	0.52979	0.982052
YDR163W	56.2172	0.755675	0.4253	1.7768	0.0756006	0.75924
YDR164C	99.5749	-0.0997338	0.311016	-0.320671	0.74846	0.995016
YDR165W	81.925	-0.0270889	0.318158	-0.0851431	0.932148	0.997602
YDR166C	44.4224	-0.439467	0.373024	-1.17812	0.238749	0.911815
YDR167W	138.746	0.537388	0.318717	1.6861	0.091777	0.792833
YBL102W	71.5378	-0.579113	0.41497	-1.39556	0.162849	0.852859
YDR168W	194.425	0.215568	0.305791	0.704951	0.480841	0.973201
YDR169C	115.384	0.0991242	0.358878	0.276206	0.78239	0.995016
YDR170C	224.498	0.0431837	0.312164	0.138337	0.889974	0.995016
YDR170W-A	40.3127	-0.000805859	0.374906	-0.0021495	0.998285	0.999774
YDR171W	221.381	-0.807534	0.33192	-2.43292	0.0149777	0.433158
YDR172W	292.038	0.393582	0.35935	1.09526	0.273403	0.93514
YDR173C	24.6279	0.29069	0.417339	0.696532	0.486096	0.975031
YDR174W	530.561	-0.0649316	0.272104	-0.238628	0.811394	0.995016
YBL101C	63.2232	-0.100927	0.324789	-0.310747	0.755993	0.995016
YDR175C	98.5073	-0.225535	0.322746	-0.698799	0.484677	0.974707
YDR176W	93.8277	0.270534	0.333558	0.811058	0.417333	0.963011
YDR177W	254.365	0.264627	0.305067	0.867441	0.3857	0.963011
YDR178W	186.979	-0.944359	0.358838	-2.63171	0.00849553	0.337372
YDR179C	17.0875	0.546797	0.508807	1.07466	0.282525	0.938169
YDR179W-A	15.1567	0.00904004	0.557597	0.0162125	0.987065	0.999774
YDR180W	24.3107	-0.487724	0.436195	-1.11813	0.26351	0.929796
YDR181C	47.2897	0.749486	0.353191	2.12204	0.0338343	0.565827
YDR182W	194.193	-0.279677	0.288974	-0.967828	0.33313	0.960815
YDR182W-A	2.5357	-0.173534	1.1895	-0.145887	0.88401	0.995016
YDR183W	43.6869	0.253639	0.372097	0.681647	0.495462	0.977176
YDR184C	62.1886	0.137954	0.337427	0.40884	0.682657	0.995016
YDR185C	24.3319	-0.378795	0.477935	-0.792565	0.428031	0.963011
YDR186C	258.227	0.131187	0.278064	0.471787	0.637079	0.991693
YDR188W	266.685	0.434041	0.348685	1.2448	0.213207	0.889016
YDR189W	124.128	-0.222255	0.315217	-0.705085	0.480757	0.973201
YDR190C	362.107	0.487979	0.313817	1.55498	0.119951	0.817319
YDR191W	10.7097	-0.564999	0.616654	-0.916233	0.359545	0.963011
YDR192C	46.0735	0.0496382	0.35233	0.140886	0.88796	0.995016
YDR194C	194.275	-0.0709862	0.286672	-0.247622	0.804427	0.995016
YBL100W-B	57.7239	0.272181	0.416025	0.654241	0.512956	0.979757
YDR195W	31.5469	0.0124683	0.388568	0.0320879	0.974402	0.999774
YDR196C	133.899	0.162116	0.311239	0.520873	0.602455	0.991182
YDR197W	33.0106	-0.407904	0.407357	-1.00134	0.316661	0.957616
YDR198C	45.1651	0.152539	0.35377	0.431181	0.666336	0.995016
YDR200C	97.9077	0.442149	0.307545	1.43767	0.150528	0.845727
YDR201W	73.2175	0.398247	0.385212	1.03384	0.301212	0.946855
YDR202C	55.1747	-0.37891	0.372304	-1.01774	0.308801	0.949402
YDR204W	146.796	-0.333204	0.302447	-1.10169	0.270595	0.931903
YDR205W	55.579	-0.321439	0.354598	-0.906488	0.364678	0.963011
YBL100W-A	3.33675	-0.277481	0.965885	-0.287282	0.773896	0.995016
YDR206W	81.7201	-0.164716	0.364925	-0.451369	0.651724	0.995016
YDR207C	72.8634	-0.142627	0.3686	-0.386944	0.698798	0.995016
YDR208W	116.605	-0.0769643	0.283584	-0.271398	0.786085	0.995016
YDR210W	73.3492	0.342276	0.355469	0.962888	0.335604	0.960815
YDR210W-B	48.2229	0.312427	0.373791	0.835835	0.403248	0.963011
YDR210W-A	17.1041	0.0878854	0.527899	0.166482	0.867778	0.995016
YDR210C-D	583.88	0.939211	0.293646	3.19845	0.00138168	0.145545
YDR210C-C	156.494	1.01425	0.321208	3.15761	0.00159068	0.145545
YDR211W	159.049	0.12973	0.303124	0.427977	0.668668	0.995016
YDR212W	203.813	-0.194195	0.272146	-0.713569	0.475494	0.972345
YDR213W	41.5006	0.325481	0.390019	0.834526	0.403985	0.963011
YDR214W	202.35	0.0385874	0.319698	0.1207	0.903929	0.997203
YDR216W	121.893	-0.58078	0.364678	-1.59258	0.111254	0.809227
YDR217C	57.7085	0.631782	0.381263	1.65708	0.0975038	0.797358
YDR218C	0.948514	0.017688	1.81038	0.00977031	0.992205	0.999774
YDR219C	40.706	0.0276337	0.386652	0.071469	0.943024	0.997602
YDR221W	60.5961	0.38181	0.35509	1.07525	0.282263	0.938169
YDR222W	5.45163	-0.499262	0.823762	-0.606075	0.544465	0.985673
YDR223W	6.43499	-0.207424	0.732114	-0.283322	0.77693	0.995016
YBL099W	1028.31	-0.887582	0.301851	-2.94046	0.00327722	0.204541
YDR224C	711.243	0.042544	0.273069	0.1558	0.876191	0.995016
YDR225W	699.121	-0.00633569	0.296959	-0.0213352	0.982978	0.999774
YDR226W	444.052	-0.196447	0.278742	-0.704763	0.480958	0.973201
YDR227W	43.9788	-0.0150054	0.385978	-0.0388763	0.968989	0.999774
YDR228C	46.3868	-0.0583727	0.403559	-0.144645	0.884991	0.995016
YDR229W	84.9545	0.642242	0.367324	1.74843	0.0803892	0.763042
YDR231C	57.7173	-0.3339	0.356117	-0.937612	0.348444	0.960815
YDR232W	173.591	-0.191993	0.33067	-0.580619	0.561497	0.985673
YDR233C	593.068	-0.0969166	0.276424	-0.350609	0.725882	0.995016
YDR234W	84.1322	0.236026	0.372829	0.633069	0.526689	0.982052
YBL098W	46.8415	-0.122623	0.369096	-0.332225	0.739719	0.995016
YDR235W	39.7479	-0.271857	0.394063	-0.689881	0.490269	0.976359
YDR236C	45.9555	-0.193597	0.407941	-0.474571	0.635093	0.991193
YDR237W	82.9424	-0.216442	0.320643	-0.675027	0.499659	0.978991
YDR238C	266.629	-0.362458	0.305671	-1.18578	0.23571	0.910657
YDR239C	44.3247	0.138702	0.406433	0.341268	0.732902	0.995016
YDR240C	45.2942	-0.00616709	0.36141	-0.017064	0.986386	0.999774
YDR242W	14.0895	0.207976	0.524753	0.396332	0.69186	0.995016
YDR243C	29.9482	0.303314	0.41251	0.735288	0.462164	0.966149
YDR244W	56.2048	0.475015	0.390408	1.21671	0.223713	0.902266
YBL097W	21.3096	0.278581	0.445413	0.625445	0.531679	0.982052
YDR245W	202.191	0.170689	0.276267	0.617843	0.536679	0.982956
YDR246W	122.786	0.00997969	0.313346	0.0318488	0.974593	0.999774
YDR246W-A	2.60178	0.211376	1.14773	0.184169	0.853881	0.995016
YDR247W	37.7007	-0.421548	0.430269	-0.979731	0.327219	0.960815
YDR248C	56.393	0.570996	0.343493	1.66232	0.0964479	0.797358
YDR249C	19.4455	-0.133656	0.465187	-0.287317	0.77387	0.995016
YDR251W	145.163	-0.298858	0.303159	-0.985812	0.324226	0.960815
YDR252W	12.2718	-0.0811987	0.578447	-0.140374	0.888365	0.995016
YDR253C	25.1212	1.15939	0.567785	2.04196	0.0411559	0.611879
YDR254W	18.7586	-0.229966	0.472452	-0.486751	0.626435	0.991182
YAL059W	65.9294	0.633324	0.357768	1.77021	0.0766923	0.75924
YBL095W	20.494	-0.320232	0.493446	-0.648971	0.516357	0.980324
YDR255C	36.2063	-0.60511	0.380428	-1.5906	0.111699	0.810685
YDR256C	6.46087	0.449001	0.767103	0.58532	0.558332	0.985673
YDR257C	43.4785	0.233304	0.367721	0.634459	0.525782	0.982052
YDR258C	140.826	-0.464994	0.429555	-1.0825	0.27903	0.938169
YDR259C	20.9363	-0.154204	0.440768	-0.349852	0.72645	0.995016
YDR260C	87.9773	0.269516	0.316007	0.852878	0.393727	0.963011
YDR261C	114.078	-0.0261463	0.309551	-0.0844654	0.932686	0.997602
YDR261W-B	79.7599	0.587795	0.398215	1.47608	0.139924	0.826612
YDR261W-A	7.41609	0.260953	0.796237	0.327733	0.743114	0.995016
YBL093C	155.518	0.975836	0.356163	2.73986	0.0061465	0.298515
YDR261C-D	529.252	0.561623	0.311055	1.80555	0.0709894	0.753104
YDR261C-C	67.1458	1.27088	0.349032	3.64115	0.000271418	0.0465242
YDR262W	104.848	-0.101367	0.350716	-0.289029	0.772559	0.995016
YDR263C	5.3553	0.172053	0.76945	0.223605	0.823065	0.995016
YDR264C	196.206	0.293049	0.332521	0.881294	0.378159	0.963011
YDR265W	34.7388	0.200531	0.414659	0.483606	0.628666	0.991182
YDR266C	65.0203	-0.16437	0.322869	-0.509091	0.610688	0.991182
YDR267C	80.7464	0.0968477	0.343455	0.281981	0.777958	0.995016
YDR268W	29.3895	-0.0248121	0.460594	-0.0538697	0.957039	0.998909
YBL092W	4117.98	0.130477	0.34417	0.379106	0.704609	0.995016
YDR270W	60.7631	0.682707	0.458461	1.48913	0.136454	0.826612
YDR272W	108.826	-0.0169246	0.390551	-0.0433351	0.965434	0.999774
YDR273W	14.2463	1.05894	0.544745	1.94391	0.0519058	0.684405
YDR275W	98.4134	0.0442381	0.336994	0.131273	0.89556	0.995296
YDR276C	552.001	-0.0856928	0.307787	-0.278416	0.780693	0.995016
YDR277C	328.361	0.358348	0.314286	1.1402	0.254203	0.921386
YDR279W	35.2383	0.0421342	0.381278	0.110508	0.912007	0.997602
YDR280W	80.0961	0.202951	0.328085	0.618591	0.536186	0.982956
YDR281C	198.494	0.791983	0.319346	2.48002	0.0131376	0.418392
YBL091C-A	65.5855	0.0700737	0.383055	0.182934	0.85485	0.995016
YDR282C	29.1205	0.262231	0.403936	0.649189	0.516216	0.980324
YDR283C	74.2703	-0.0151443	0.312585	-0.0484484	0.961359	0.999353
YDR284C	122.873	-0.275941	0.345537	-0.798585	0.424531	0.963011
YDR285W	16.844	-0.0152631	0.530702	-0.0287602	0.977056	0.999774
YDR286C	22.8697	0.0692145	0.441882	0.156636	0.875532	0.995016
YDR287W	49.4676	0.210023	0.349669	0.600634	0.548084	0.985673
YDR288W	53.2532	-0.000374486	0.34938	-0.00107186	0.999145	0.999774
YDR289C	71.1563	0.65562	0.357143	1.83574	0.0663969	0.74379
YDR291W	49.5772	-0.151849	0.373348	-0.406723	0.684211	0.995016
YDR292C	103.404	-0.0242764	0.300075	-0.080901	0.935521	0.997602
YBL091C	461.706	0.0727396	0.269248	0.270158	0.787038	0.995016
YDR293C	205.181	-0.172462	0.285831	-0.603371	0.546262	0.985673
YDR294C	184.932	-0.105267	0.273041	-0.385536	0.69984	0.995016
YDR295C	34.4753	0.424238	0.422083	1.00511	0.314845	0.9552
YDR296W	109.676	0.587214	0.330858	1.77482	0.0759268	0.75924
YDR297W	246.74	0.0650944	0.346018	0.188124	0.850779	0.995016
YDR298C	284.829	-0.892103	0.372582	-2.39438	0.0166485	0.433158
YDR299W	103.195	0.257051	0.355765	0.722531	0.469968	0.968894
YDR300C	101.893	-0.144814	0.340284	-0.425569	0.670422	0.995016
YDR301W	63.1438	-0.173964	0.354064	-0.491336	0.623189	0.991182
YDR302W	38.6952	-0.0202404	0.368387	-0.0549432	0.956184	0.998909
YBL090W	91.2237	-0.0305876	0.330686	-0.0924976	0.926303	0.997602
YDR303C	50.3121	-0.291391	0.347821	-0.837763	0.402164	0.963011
YDR304C	610.399	-0.182394	0.293733	-0.620952	0.534631	0.982956
YDR305C	39.0223	0.0422351	0.375757	0.1124	0.910506	0.997602
YDR306C	48.4904	-0.127706	0.377412	-0.338372	0.735083	0.995016
YDR307W	68.5755	-0.207873	0.381703	-0.544594	0.586033	0.991182
YDR308C	127.628	0.238154	0.307306	0.774973	0.438355	0.963011
YDR309C	298.589	0.263355	0.333794	0.788973	0.430128	0.963011
YDR310C	154.108	0.413984	0.350895	1.17979	0.238082	0.911074
YDR311W	65.6805	0.126007	0.330094	0.38173	0.702661	0.995016
YBL089W	35.7928	-0.503203	0.392348	-1.28254	0.199652	0.88439
YDR312W	86.3829	0.427301	0.385713	1.10782	0.267939	0.931903
YDR313C	50.1003	0.106237	0.337208	0.31505	0.752724	0.995016
YDR314C	13.2702	-1.00733	0.546246	-1.8441	0.0651682	0.737476
YDR315C	22.8385	0.254144	0.46455	0.547075	0.584327	0.991182
YDR316W	61.1319	-0.160761	0.364835	-0.440641	0.659473	0.995016
YDR316W-B	47.7215	0.928203	0.452836	2.04976	0.0403882	0.605096
YDR316W-A	0.24859	1.22715	3.53502	0.347141	0.728486	0.995016
YDR317W	4.29255	0.135955	0.867059	0.1568	0.875402	0.995016
YDR318W	43.9148	-0.12339	0.347446	-0.355135	0.722488	0.995016
YBL088C	46.0949	-0.154281	0.3502	-0.440549	0.659539	0.995016
YDR319C	29.5081	0.158714	0.457029	0.347273	0.728386	0.995016
YDR320C	72.6602	0.149028	0.351949	0.423438	0.671976	0.995016
YDR320C-A	56.652	-0.306217	0.360094	-0.85038	0.395114	0.963011
YDR321W	125.855	0.0371982	0.30134	0.123443	0.901756	0.996631
YDR322W	69.2697	-0.600942	0.38214	-1.57257	0.115818	0.817319
YDR322C-A	284.371	-0.113553	0.31181	-0.364172	0.715729	0.995016
YDR323C	32.9076	0.0804063	0.404943	0.198562	0.842605	0.995016
YDR324C	116.887	0.141683	0.356872	0.397013	0.691358	0.995016
YDR325W	51.9464	-0.0206729	0.351941	-0.0587395	0.95316	0.998211
YDR326C	74.4966	-0.289527	0.321828	-0.899634	0.368315	0.963011
YBL087C	580.587	-0.110457	0.277963	-0.397378	0.691089	0.995016
YDR328C	446.113	0.286614	0.282525	1.01447	0.310357	0.949546
YDR329C	125.273	0.437934	0.300268	1.45848	0.144709	0.839169
YDR330W	139.819	0.18321	0.312181	0.586871	0.55729	0.985673
YDR331W	56.0099	-0.179188	0.423761	-0.422851	0.672404	0.995016
YDR332W	26.254	0.821993	0.429624	1.91328	0.0557116	0.696914
YDR333C	75.0132	0.0288032	0.380346	0.0757289	0.939635	0.997602
YDR334W	95.8003	0.21873	0.324888	0.673247	0.50079	0.979518
YDR335W	146.852	-0.177242	0.298368	-0.594037	0.552487	0.985673
YDR336W	24.9839	-0.240387	0.422802	-0.568556	0.569658	0.990379
YDR337W	71.5308	-0.00178753	0.319168	-0.00560059	0.995531	0.999774
YBL086C	97.0505	0.352575	0.343394	1.02673	0.304545	0.946855
YDR338C	48.7576	-0.12537	0.3554	-0.352758	0.72427	0.995016
YDR339C	108.111	0.262459	0.307646	0.853121	0.393592	0.963011
YDR341C	315.595	-0.103714	0.274854	-0.377343	0.705919	0.995016
YDR342C	2044.41	0.138054	0.330726	0.417429	0.676365	0.995016
YDR343C	1970.95	0.17762	0.346356	0.512824	0.608074	0.991182
YDR345C	62.911	0.429756	0.396557	1.08372	0.278489	0.938169
YDR346C	371.136	0.0595717	0.297267	0.200398	0.841169	0.995016
YDR347W	111.346	-0.530704	0.317503	-1.67149	0.094624	0.797358
YDR348C	164.643	0.219454	0.331163	0.662678	0.507537	0.979518
YAL058W	57.6399	0.124113	0.350298	0.354307	0.723109	0.995016
YBL085W	158.056	0.110186	0.310346	0.355044	0.722557	0.995016
YDR349C	142.362	-0.179893	0.294709	-0.61041	0.541591	0.985673
YDR350C	54.4971	-0.245625	0.388939	-0.631525	0.527697	0.982052
YDR351W	62.4596	-0.0501578	0.36742	-0.136514	0.891415	0.995016
YDR352W	41.4553	-0.166417	0.372997	-0.446161	0.655481	0.995016
YDR353W	563.226	0.232807	0.316287	0.736063	0.461692	0.966149
YDR354W	106.607	0.268535	0.290741	0.923624	0.355682	0.963011
YDR356W	69.8041	0.190631	0.328585	0.580156	0.56181	0.985673
YDR357C	62.0662	0.0947479	0.399836	0.236967	0.812683	0.995016
YDR358W	85.1577	-0.116524	0.301622	-0.386326	0.699255	0.995016
YBL084C	30.7386	-0.454103	0.393289	-1.15463	0.248243	0.918077
YDR359C	66.809	0.692217	0.39385	1.75756	0.0788216	0.75924
YDR361C	144.974	0.02781	0.33081	0.0840664	0.933004	0.997602
YDR362C	65.3087	0.282097	0.324585	0.869099	0.384793	0.963011
YDR363W	35.8642	-0.355959	0.370518	-0.960706	0.3367	0.960815
YDR363W-A	245.274	0.0793001	0.373219	0.212476	0.831736	0.995016
YDR364C	59.9115	-0.369598	0.380722	-0.97078	0.331658	0.960815
YDR365C	538.394	0.314857	0.292427	1.0767	0.281613	0.938169
YDR365W-B	343.453	0.277492	0.353507	0.784969	0.432472	0.963011
YDR365W-A	1.71751	2.25986	1.64488	1.37387	0.169482	0.860344
YBL082C	84.6488	0.016847	0.327641	0.0514193	0.958991	0.998987
YDR366C	0.553948	1.16056	2.36765	0.490171	0.624013	0.991182
YDR367W	46.8451	-0.550486	0.436329	-1.26163	0.207082	0.887987
YDR368W	152.179	-0.8302	0.343334	-2.41806	0.0156037	0.433158
YDR369C	18.0773	-0.0110431	0.496613	-0.0222368	0.982259	0.999774
YDR370C	49.1198	-0.119713	0.345914	-0.346078	0.729284	0.995016
YDR371W	51.6584	-0.049365	0.369814	-0.133486	0.893809	0.995016
YDR372C	177.342	0.0726356	0.289644	0.250776	0.801988	0.995016
YDR373W	57.7033	0.0835244	0.397877	0.209925	0.833726	0.995016
YDR374C	1.06609	0.197748	1.69545	0.116634	0.90715	0.9976
YDR374W-A	22.8608	-0.222729	0.462497	-0.481579	0.630105	0.991182
YBL081W	117.251	0.838231	0.562158	1.49109	0.135937	0.826612
YDR375C	62.3663	-0.289015	0.3731	-0.774631	0.438558	0.963011
YDR376W	66.7014	-0.0771346	0.325258	-0.237149	0.812541	0.995016
YDR377W	381.817	-0.76563	0.372134	-2.0574	0.0396477	0.600174
YDR378C	295.208	0.346705	0.298451	1.16168	0.245366	0.91781
YDR379W	68.697	-0.0622768	0.367406	-0.169504	0.8654	0.995016
YDR379C-A	62.8502	-0.52801	0.553994	-0.953098	0.34054	0.960815
YDR380W	41.6361	-1.42184	0.450488	-3.15622	0.0015983	0.145545
YDR381W	353.236	0.106182	0.252933	0.419803	0.67463	0.995016
YDR381C-A	40.68	0.269614	0.470365	0.573202	0.566508	0.9887
YDR382W	1267.26	-0.223597	0.28781	-0.776893	0.437222	0.963011
YBL080C	42.0642	-0.0765089	0.356303	-0.21473	0.829978	0.995016
YDR383C	36.8833	0.526805	0.406554	1.29578	0.195051	0.878835
YDR384C	45.5825	0.500367	0.468959	1.06697	0.285983	0.94271
YDR385W	3308.48	-0.404645	0.280373	-1.44324	0.148954	0.84493
YDR386W	20.0649	-0.151233	0.482037	-0.313736	0.753721	0.995016
YDR387C	48.4599	-0.427875	0.395014	-1.08319	0.278724	0.938169
YDR388W	354.041	-0.0185947	0.259305	-0.0717098	0.942833	0.997602
YDR389W	89.7125	-0.0474714	0.336295	-0.14116	0.887744	0.995016
YDR390C	84.8734	-0.134866	0.319567	-0.422028	0.673004	0.995016
YDR391C	120.313	-0.510207	0.345468	-1.47686	0.139714	0.826612
YBL079W	109.608	0.00784868	0.31089	0.0252459	0.979859	0.999774
YDR392W	56.1785	0.572233	0.373432	1.53236	0.125434	0.821877
YDR393W	52.172	0.169502	0.387782	0.437106	0.662034	0.995016
YDR394W	318.803	-0.103235	0.261287	-0.395104	0.692766	0.995016
YDR395W	109.336	-0.0420419	0.294143	-0.14293	0.886345	0.995016
YDR397C	174.398	-0.0594623	0.286488	-0.207556	0.835576	0.995016
YDR398W	163.274	0.282158	0.376391	0.74964	0.453472	0.966149
YDR399W	190.343	-0.078346	0.300859	-0.260407	0.79455	0.995016
YDR400W	46.2296	0.170912	0.361776	0.472424	0.636624	0.991678
YDR402C	1.20384	0.519672	1.73878	0.298871	0.765038	0.995016
YDR403W	3.9765	1.70371	1.00341	1.69793	0.0895219	0.790941
YBL078C	57.7295	-0.500604	0.414491	-1.20776	0.227141	0.902266
YDR404C	93.715	-0.219171	0.372576	-0.588257	0.55636	0.985673
YDR405W	214.443	0.506589	0.375801	1.34802	0.177651	0.865801
YDR406W	67.9127	-0.476739	0.352366	-1.35297	0.176067	0.865801
YDR407C	66.5876	-0.156556	0.348053	-0.449805	0.652851	0.995016
YDR408C	156.708	0.290497	0.325888	0.891402	0.372713	0.963011
YDR409W	26.7817	0.131547	0.412198	0.319137	0.749623	0.995016
YDR410C	32.0903	0.19629	0.410877	0.477734	0.632839	0.991182
YDR411C	90.7203	-0.0846387	0.31806	-0.266109	0.790155	0.995016
YDR412W	128.578	0.953326	0.41178	2.31513	0.0206056	0.472793
YDR414C	22.6726	0.1001	0.46694	0.214374	0.830255	0.995016
YBL076C	566.032	-0.281656	0.290695	-0.968905	0.332593	0.960815
YDR415C	64.0409	-0.061385	0.337289	-0.181995	0.855587	0.995016
YDR416W	34.5736	0.357239	0.379868	0.940429	0.346998	0.960815
YDR418W	1160.49	-0.271635	0.290557	-0.93488	0.34985	0.960971
YDR419W	37.3439	0.303694	0.397582	0.763853	0.444955	0.963763
YDR420W	102.492	0.36408	0.341001	1.06768	0.285665	0.94271
YDR421W	39.4927	0.414647	0.38355	1.08108	0.279663	0.938169
YDR422C	76.6487	-0.0926666	0.348397	-0.26598	0.790255	0.995016
YDR423C	75.6337	0.435118	0.352912	1.23293	0.2176	0.896236
YDR424C	168.484	0.260296	0.326833	0.796422	0.425787	0.963011
YBL075C	38.8782	0.256313	0.366418	0.69951	0.484233	0.974707
YDR425W	31.8397	-0.212614	0.392296	-0.541973	0.587837	0.991182
YDR427W	177.705	-0.774177	0.331631	-2.33445	0.0195721	0.45959
YDR428C	74.0415	0.0779149	0.351288	0.221798	0.824471	0.995016
YDR429C	439.875	0.548692	0.311832	1.75958	0.0784797	0.75924
YDR430C	69.2493	-0.418568	0.334319	-1.252	0.210569	0.887987
YDR432W	589.722	0.350106	0.377488	0.927463	0.353686	0.960971
YDR434W	122.469	-0.218346	0.284311	-0.767984	0.442497	0.963344
YDR435C	54.2453	-0.221292	0.367533	-0.602101	0.547107	0.985673
YDR436W	62.0972	-0.13662	0.321751	-0.424615	0.671118	0.995016
YDR437W	9.73714	-0.411499	0.623994	-0.65946	0.5096	0.979757
YBL074C	7.60988	0.0983848	0.735854	0.133702	0.893639	0.995016
YDR438W	19.7845	0.405845	0.465367	0.872097	0.383156	0.963011
YDR439W	38.8784	0.0303027	0.361834	0.0837476	0.933257	0.997602
YDR440W	60.4948	0.373185	0.381398	0.978466	0.327844	0.960815
YDR441C	57.3746	0.342026	0.365608	0.935499	0.349531	0.960971
YDR443C	36.8191	-0.195347	0.400317	-0.487979	0.625565	0.991182
YDR444W	66.2157	0.0669034	0.323078	0.207081	0.835946	0.995016
YDR446W	0.131016	1.22714	4.08047	0.300734	0.763617	0.995016
YDR447C	571.158	-0.439617	0.33546	-1.31049	0.19003	0.873532
YDR448W	50.4473	0.130783	0.378169	0.345833	0.729468	0.995016
YAL056W	111.113	0.0863112	0.309912	0.278503	0.780627	0.995016
YDR449C	40.814	0.165628	0.372029	0.445202	0.656174	0.995016
YDR450W	1948.34	-0.0454791	0.259776	-0.17507	0.861024	0.995016
YDR451C	112.277	-0.0767428	0.323376	-0.237317	0.812411	0.995016
YDR452W	231.206	0.194051	0.287462	0.675049	0.499645	0.978991
YDR453C	26.098	-1.14391	0.652416	-1.75334	0.0795436	0.761215
YDR454C	252.187	-0.155887	0.332093	-0.469408	0.638778	0.993011
YDR456W	93.4299	-0.0166793	0.336006	-0.0496398	0.960409	0.998987
YDR457W	200.468	-0.134998	0.281492	-0.479579	0.631527	0.991182
YDR458C	73.0433	-0.195259	0.311377	-0.627082	0.530606	0.982052
YDR459C	32.0187	0.160056	0.416729	0.384076	0.700922	0.995016
YBL072C	3308.47	-0.0825062	0.260687	-0.316495	0.751627	0.995016
YDR460W	67.8409	0.295436	0.340417	0.867865	0.385468	0.963011
YDR461W	165.521	-2.21879	0.345479	-6.42237	1.34169e-10	2.60645e-07
YDR461C-A	56.6942	0.955071	0.361811	2.6397	0.00829799	0.337372
YDR462W	119.145	0.216892	0.373489	0.58072	0.56143	0.985673
YDR463W	177.782	0.163106	0.309924	0.526277	0.598696	0.991182
YDR464W	92.0289	0.442902	0.379245	1.16785	0.242866	0.916323
YDR465C	227.014	0.608934	0.33708	1.8065	0.0708405	0.753104
YDR466W	104.082	0.0132522	0.329677	0.0401975	0.967936	0.999774
YDR468C	101.763	0.393462	0.315531	1.24698	0.212404	0.888012
YDR469W	90.6868	0.322941	0.30962	1.04302	0.296938	0.946855
YBL071C-B	6.1163	0.919172	0.836494	1.09884	0.271838	0.931903
YDR470C	50.8845	-0.285701	0.393558	-0.725943	0.467874	0.968657
YDR471W	1025.7	0.051963	0.273636	0.189898	0.849389	0.995016
YDR472W	43.7986	-0.602698	0.408312	-1.47607	0.139925	0.826612
YDR473C	54.5156	0.510359	0.351343	1.45259	0.146337	0.844466
YDR475C	64.9144	-0.469864	0.335863	-1.39898	0.161819	0.852859
YDR476C	158.115	0.879122	0.375197	2.3431	0.0191245	0.456793
YDR477W	172.676	-0.159832	0.306364	-0.521706	0.601875	0.991182
YDR478W	11.2867	-0.21287	0.595491	-0.35747	0.72074	0.995016
YDR479C	99.7186	-0.182303	0.291435	-0.625535	0.53162	0.982052
YBL071W-A	51.5446	1.27605	0.527909	2.41717	0.0156418	0.433158
YDR480W	37.312	0.287195	0.393927	0.729056	0.465967	0.967121
YDR481C	278.418	-0.0242738	0.273332	-0.088807	0.929235	0.997602
YDR482C	125.948	1.14687	0.455361	2.5186	0.0117821	0.390824
YDR483W	310.205	-0.404609	0.324054	-1.24858	0.211817	0.888012
YDR484W	27.6007	-0.371716	0.407164	-0.91294	0.361274	0.963011
YDR485C	83.7396	0.363358	0.358065	1.01478	0.31021	0.949546
YDR486C	131.525	0.171442	0.29995	0.571569	0.567614	0.989251
YDR487C	263.352	0.0316711	0.261207	0.121249	0.903494	0.997203
YDR488C	41.7535	1.10948	0.515353	2.15285	0.0313306	0.552213
YDR489W	27.2324	-0.524049	0.424997	-1.23307	0.217551	0.896236
YBL069W	50.2956	0.273869	0.372483	0.735251	0.462186	0.966149
YDR490C	94.089	-0.0389271	0.304186	-0.127971	0.898172	0.995682
YDR492W	97.3959	-0.300642	0.474388	-0.633748	0.526245	0.982052
YDR493W	41.3414	-0.0906945	0.369446	-0.245487	0.806079	0.995016
YDR494W	134.494	-0.154185	0.306396	-0.503219	0.61481	0.991182
YDR495C	40.2454	-0.355377	0.385215	-0.922544	0.356245	0.963011
YDR496C	179.164	0.27869	0.348398	0.799917	0.423759	0.963011
YDR497C	709.329	0.589157	0.360538	1.63411	0.102236	0.797358
YDR498C	80.5551	-0.335557	0.329029	-1.01984	0.307804	0.94764
YDR499W	38.9542	0.497599	0.393941	1.26313	0.206542	0.887987
YDR500C	2811.09	0.911719	0.507428	1.79674	0.0723762	0.756214
YBL068W	76.2276	-0.0978475	0.309536	-0.31611	0.751919	0.995016
YDR501W	23.1403	0.0775629	0.43705	0.177469	0.85914	0.995016
YDR502C	411.951	0.649078	0.422079	1.53781	0.124095	0.821877
YDR503C	38.9396	-0.0256978	0.373077	-0.0688806	0.945085	0.997602
YDR504C	3.56132	0.00381081	1.0234	0.00372367	0.997029	0.999774
YDR505C	81.6481	-0.446311	0.33628	-1.3272	0.184442	0.86829
YDR506C	25.1874	0.467813	0.433524	1.07909	0.280546	0.938169
YDR507C	114.701	0.306563	0.387396	0.791342	0.428744	0.963011
YDR508C	501.715	-0.222593	0.255944	-0.869696	0.384467	0.963011
YDR510W	443.386	-0.0432383	0.258174	-0.167477	0.866995	0.995016
YBL067C	75.6029	0.0402801	0.323652	0.124455	0.900955	0.996631
YDR511W	60.0187	-0.00223707	0.399535	-0.00559918	0.995533	0.999774
YDR512C	118.721	0.654031	0.369015	1.77237	0.0763336	0.75924
YDR513W	169.189	-0.797344	0.372237	-2.14204	0.0321907	0.55428
YDR514C	43.4371	0.671898	0.439962	1.52717	0.126718	0.823314
YDR515W	26.0395	0.0701549	0.434303	0.161535	0.871672	0.995016
YDR516C	552.088	-0.615022	0.380907	-1.61463	0.106392	0.803521
YDR517W	289.756	0.132781	0.274216	0.48422	0.62823	0.991182
YDR518W	180.055	-0.039163	0.338955	-0.11554	0.908017	0.9976
YDR519W	71.3795	0.303278	0.32327	0.938156	0.348164	0.960815
YDR520C	43.6432	-0.271996	0.357806	-0.760177	0.447149	0.964822
YBL066C	75.2743	-0.278818	0.37987	-0.733982	0.46296	0.966366
YDR523C	4.1317	-1.27342	0.926617	-1.37426	0.16936	0.860344
YDR524C	59.5902	-0.139272	0.352678	-0.394898	0.692918	0.995016
YDR524W-C	0.877892	2.06135	2.20766	0.933725	0.350446	0.960971
YDR524C-B	2823.86	0.247384	0.307312	0.804993	0.420823	0.963011
YDR525W-A	21.3089	-0.299839	0.530727	-0.564959	0.572102	0.990379
YDR527W	113.502	0.353856	0.362779	0.975405	0.329359	0.960815
YDR528W	57.1428	-0.234839	0.353696	-0.663957	0.506718	0.979518
YDR529C	763.946	-1.01902	0.31404	-3.24488	0.00117499	0.136806
YBL064C	297.855	-0.893786	0.474855	-1.88223	0.0598049	0.710097
YDR530C	121.859	-0.367233	0.307204	-1.19541	0.231929	0.910657
YDR531W	56.2847	-0.182003	0.402153	-0.452571	0.650857	0.995016
YDR532C	37.8997	0.590953	0.373533	1.58207	0.113635	0.813606
YDR533C	30.4313	-0.0588169	0.459531	-0.127993	0.898154	0.995682
YDR534C	25.7469	1.02762	0.527524	1.94801	0.0514141	0.682555
YDR536W	7.04298	-1.56258	0.857193	-1.82291	0.0683173	0.75016
YDR538W	30.2084	-0.329468	0.419509	-0.785367	0.432238	0.963011
YDR539W	99.6033	0.281273	0.358118	0.785421	0.432207	0.963011
YDR540C	3.9162	0.254407	0.883306	0.288016	0.773334	0.995016
YDR541C	24.7498	0.26943	0.469602	0.573742	0.566142	0.9887
YBL063W	33.4024	-0.409023	0.385547	-1.06089	0.288739	0.942729
YDR542W	0.918143	1.18031	1.85338	0.636842	0.524228	0.982052
YDR545W	10.1402	6.93536	1.29271	5.36497	8.09649e-08	7.86439e-05
YEL077C	175.523	1.27723	0.458699	2.78447	0.0053616	0.271717
YEL076C-A	5.73699	1.74706	0.873871	1.99922	0.0455843	0.647965
YEL076C	4.76138	2.08918	0.955861	2.18565	0.0288411	0.541577
YEL075C	1.12466	-1.05364	1.75371	-0.600804	0.547971	0.985673
YEL073C	10.929	0.382171	0.635762	0.601122	0.547759	0.985673
YEL072W	17.9837	0.0671974	0.49171	0.136661	0.891299	0.995016
YEL071W	205.786	0.117822	0.518867	0.227075	0.820366	0.995016
YEL070W	39.6083	-1.44866	0.566082	-2.55911	0.0104942	0.368434
YAL055W	66.4505	0.32425	0.419728	0.772524	0.439804	0.963011
YBL061C	70.3204	0.567293	0.350071	1.62051	0.105124	0.803521
YEL069C	0.686481	-1.30627	2.18706	-0.597273	0.550325	0.985673
YEL068C	56.2256	-0.0964876	0.348615	-0.276774	0.781953	0.995016
YEL067C	12.4819	0.866237	0.592361	1.46235	0.143646	0.836332
YEL066W	33.5354	0.372538	0.408056	0.91296	0.361264	0.963011
YEL065W	170.352	0.309967	0.475931	0.651285	0.514862	0.979757
YEL064C	30.7264	-0.224212	0.42317	-0.529838	0.596224	0.991182
YEL063C	136.601	-0.177775	0.281976	-0.630461	0.528393	0.982052
YEL062W	27.9115	-0.464481	0.425697	-1.09111	0.275225	0.937188
YEL061C	75.2447	0.224543	0.311279	0.721356	0.470691	0.968894
YEL060C	490.813	0.359818	0.277733	1.29555	0.195129	0.878835
YBL060W	41.898	0.225585	0.385978	0.584451	0.558917	0.985673
YEL059C-A	33.4468	0.335471	0.410835	0.816559	0.414181	0.963011
YEL058W	153.297	-0.074451	0.310592	-0.239707	0.810558	0.995016
YEL057C	97.2738	-0.599302	0.366401	-1.63565	0.101914	0.797358
YEL056W	108.727	-0.295752	0.296529	-0.997379	0.318581	0.957616
YEL055C	103.523	0.138321	0.331445	0.417326	0.67644	0.995016
YEL054C	912.549	-0.270915	0.261911	-1.03438	0.30096	0.946855
YEL053C	76.2515	-0.432752	0.313539	-1.38022	0.16752	0.85938
YEL052W	156.035	-0.44291	0.284147	-1.55874	0.119059	0.817319
YEL051W	597.449	0.154799	0.286756	0.539826	0.589317	0.991182
YBL059C-A	127.765	0.0557864	0.310727	0.179535	0.857518	0.995016
YEL050C	113.709	0.0638521	0.293493	0.217559	0.827773	0.995016
YEL049W	1.13104	1.47913	1.74713	0.846606	0.397215	0.963011
YEL048C	7.30939	0.0350743	0.688833	0.0509185	0.95939	0.998987
YEL047C	155.662	-0.0139422	0.344714	-0.0404456	0.967738	0.999774
YEL046C	358.894	-0.589825	0.356484	-1.65456	0.098014	0.797358
YEL044W	70.1585	0.557137	0.369362	1.50838	0.131458	0.825015
YEL043W	152.951	0.189999	0.295713	0.642514	0.52054	0.980829
YBL059W	60.9601	0.0924226	0.344774	0.268067	0.788648	0.995016
YEL042W	284.876	0.0403683	0.261354	0.154459	0.877248	0.995016
YEL041W	23.1283	0.467231	0.437347	1.06833	0.285372	0.94271
YEL040W	454.596	0.216814	0.345208	0.628069	0.529959	0.982052
YEL039C	76.7202	-0.814748	0.571861	-1.42473	0.154235	0.847862
YEL038W	74.5477	-0.0103478	0.334566	-0.0309291	0.975326	0.999774
YEL037C	276.339	0.658977	0.399228	1.65063	0.0988139	0.797358
YEL036C	213.522	0.572136	0.381769	1.49864	0.133966	0.826612
YEL035C	0.318312	0.265373	2.98948	0.0887691	0.929265	0.997602
YEL034W	1486.37	-0.482776	0.271188	-1.78022	0.0750392	0.75924
YEL033W	86.8022	-0.442424	0.31898	-1.387	0.165443	0.856016
YBL058W	340.596	-0.167962	0.29023	-0.578722	0.562777	0.987019
YEL032W	125.061	-0.167644	0.320612	-0.522887	0.601053	0.991182
YEL031W	309.379	-0.0519227	0.310746	-0.167091	0.867299	0.995016
YEL030W	26.1573	0.416042	0.442069	0.941123	0.346642	0.960815
YEL029C	24.8269	0.158882	0.437441	0.363207	0.71645	0.995016
YEL027W	426.025	-0.206332	0.351606	-0.586828	0.557319	0.985673
YEL026W	322.229	-0.442408	0.281805	-1.5699	0.116437	0.817319
YEL025C	58.7279	-0.486165	0.355252	-1.36851	0.171153	0.861043
YEL024W	158.601	-1.17355	0.403293	-2.90993	0.00361513	0.212573
YBL057C	168.789	0.726386	0.388756	1.86849	0.0616941	0.721994
YEL023C	25.9379	-0.0192799	0.420024	-0.045902	0.963388	0.999774
YEL022W	152.944	-0.0572146	0.325888	-0.175565	0.860636	0.995016
YEL021W	170.551	0.474854	0.381553	1.24453	0.213305	0.889016
YEL020W-A	144.612	0.016603	0.283558	0.0585523	0.953309	0.998211
YEL020C	33.4198	-0.313155	0.396437	-0.789925	0.429571	0.963011
YEL019C	9.09316	-0.588149	0.679074	-0.866105	0.386433	0.963011
YEL018W	74.8617	0.685746	0.365399	1.87671	0.0605585	0.714446
YEL017C-A	127.062	-0.0203474	0.355549	-0.057228	0.954364	0.998211
YEL017W	103.219	-0.253637	0.354513	-0.715452	0.47433	0.970985
YBL056W	259.279	-0.233108	0.327814	-0.7111	0.477022	0.973038
YEL016C	73.3133	-0.196505	0.325937	-0.602895	0.546579	0.985673
YEL015W	179.139	-0.292157	0.292012	-1.0005	0.31707	0.957616
YEL013W	101.58	-0.338962	0.361744	-0.937021	0.348748	0.960815
YEL012W	80.9595	0.237736	0.335985	0.707577	0.479208	0.973201
YEL011W	472.161	-1.19345	0.442667	-2.69604	0.00701691	0.317399
YEL009C	860.815	-0.425218	0.292011	-1.45617	0.145345	0.841988
YEL007W	182.668	-0.382581	0.338685	-1.12961	0.258642	0.926471
YBL055C	38.6412	0.142377	0.386559	0.368319	0.712636	0.995016
YEL006W	52.3517	-0.144276	0.383588	-0.376123	0.706826	0.995016
YEL005C	46.6132	-0.0774233	0.393649	-0.196681	0.844077	0.995016
YEL004W	21.8327	-0.262531	0.465856	-0.563546	0.573063	0.990454
YEL003W	157.202	0.246293	0.274129	0.898456	0.368942	0.963011
YEL002C	342.318	-0.248791	0.300028	-0.829228	0.406975	0.963011
YEL001C	283.418	0.0116298	0.320881	0.0362433	0.971088	0.999774
YER001W	124.075	-0.247136	0.3029	-0.8159	0.414557	0.963011
YER002W	154.185	1.03997	0.429035	2.42398	0.0153514	0.433158
YER003C	292.889	-0.309589	0.270937	-1.14266	0.253179	0.921386
YER004W	171.649	0.165901	0.278922	0.594794	0.551981	0.985673
YBL054W	69.4326	0.670515	0.462201	1.4507	0.146863	0.844466
YER005W	47.6298	-0.505594	0.34749	-1.45499	0.145672	0.84224
YER006W	299.359	0.232227	0.35798	0.648715	0.516523	0.980324
YER007W	9.05757	0.0727654	0.653257	0.111389	0.911308	0.997602
YER007C-A	112.728	-0.0973292	0.295415	-0.329466	0.741803	0.995016
YER008C	106.675	-0.248271	0.328154	-0.756567	0.44931	0.966149
YER009W	254.887	-0.213008	0.394263	-0.54027	0.589011	0.991182
YER010C	104.895	0.110119	0.320869	0.34319	0.731456	0.995016
YER011W	213.643	-0.355054	0.46961	-0.756061	0.449612	0.966149
YBL052C	143.715	0.209209	0.290719	0.719625	0.471756	0.968894
YER012W	300.412	-0.153158	0.295166	-0.518888	0.603839	0.991182
YER013W	30.846	0.625127	0.399311	1.56551	0.117462	0.817319
YER014W	52.0812	0.190118	0.358011	0.53104	0.595391	0.991182
YER015W	28.7771	-0.219753	0.475527	-0.462124	0.643992	0.994196
YER016W	101.801	0.585194	0.333287	1.75583	0.0791179	0.75924
YER017C	144.235	-0.155056	0.317552	-0.488286	0.625348	0.991182
YER018C	39.893	0.233296	0.421002	0.554143	0.579481	0.991182
YER019W	63.5454	-0.126479	0.368765	-0.34298	0.731614	0.995016
YER019C-A	438.283	0.340504	0.321489	1.05915	0.289533	0.943818
YAL054C	29.9377	1.17665	0.416551	2.82473	0.00473198	0.246887
YBL051C	227.169	0.388198	0.30962	1.25379	0.209918	0.887987
YER020W	138.205	0.279655	0.350956	0.796838	0.425545	0.963011
YER021W	266.606	-0.340537	0.315896	-1.078	0.281032	0.938169
YER022W	62.3759	-0.258633	0.325818	-0.793796	0.427314	0.963011
YER023W	413.9	0.0391756	0.268504	0.145903	0.883998	0.995016
YER024W	38.0428	-0.234886	0.395586	-0.593767	0.552668	0.985673
YER025W	567.213	-0.0552095	0.345824	-0.159646	0.87316	0.995016
YER026C	181.321	0.00990818	0.299641	0.0330669	0.973621	0.999774
YER027C	215.269	-0.0526234	0.295981	-0.177793	0.858885	0.995016
YER028C	4.63264	0.33769	0.834655	0.404586	0.685782	0.995016
YBL050W	156.445	0.0927448	0.304808	0.304273	0.76092	0.995016
YER029C	77.3425	0.800141	0.373858	2.14023	0.0323362	0.55428
YER030W	364.687	0.459892	0.345786	1.32999	0.183521	0.86829
YER031C	304.321	0.224272	0.299015	0.750037	0.453233	0.966149
YER032W	94.5699	-0.344987	0.300099	-1.14958	0.250317	0.918077
YER033C	36	-0.099334	0.369146	-0.269091	0.787859	0.995016
YER034W	31.556	0.958779	0.430127	2.22906	0.02581	0.520698
YER035W	63.4333	-0.28224	0.374568	-0.753508	0.451145	0.966149
YER036C	518.699	-0.166269	0.256851	-0.647337	0.517414	0.980324
YER037W	65.9282	0.50353	0.529331	0.951258	0.341473	0.960815
YER038C	12.5228	0.275478	0.569077	0.484078	0.628331	0.991182
YBL049W	8.68779	0.769878	0.77542	0.992853	0.320782	0.957814
YER038W-A	2.14202	1.80189	1.33445	1.35029	0.176923	0.865801
YER039C	8.23193	0.660603	0.675376	0.978128	0.328011	0.960815
YER039C-A	5.71607	-0.103985	0.757523	-0.137271	0.890817	0.995016
YER040W	55.2927	0.26732	0.342609	0.780248	0.435245	0.963011
YER041W	42.981	-0.400135	0.375428	-1.06581	0.28651	0.942729
YER042W	69.8506	1.32382	0.573329	2.309	0.0209436	0.474746
YER043C	1100.33	0.219277	0.279701	0.783969	0.433058	0.963011
YER044C	68.8206	0.12507	0.469297	0.266505	0.78985	0.995016
YER044C-A	0.891746	0.811492	1.84138	0.440698	0.659431	0.995016
YER045C	32.7936	0.0533726	0.477205	0.111844	0.910947	0.997602
YBL047C	353.618	-0.145179	0.288958	-0.502421	0.615371	0.991182
YER046W	38.2818	-0.266778	0.435026	-0.613245	0.539715	0.984971
YER047C	76.4983	0.136161	0.356557	0.381878	0.702552	0.995016
YER048C	260.901	0.0748357	0.272233	0.274896	0.783396	0.995016
YER048W-A	127.813	-0.170947	0.325818	-0.524669	0.599813	0.991182
YER049W	110.326	-0.00487301	0.29892	-0.0163021	0.986993	0.999774
YER050C	149.881	-0.137871	0.287396	-0.479727	0.631421	0.991182
YER051W	34.6847	0.0344296	0.381873	0.0901598	0.92816	0.997602
YER052C	95.1717	-0.221218	0.331049	-0.668233	0.503985	0.979518
YER053C	171.24	-1.21802	0.535381	-2.27506	0.0229025	0.486736
YBL046W	64.9566	0.76172	0.501431	1.51909	0.128739	0.825015
YER053C-A	4.35434	-4.41759	1.39827	-3.15933	0.00158131	0.145545
YER054C	90.8029	-0.94964	0.383846	-2.47401	0.0133605	0.423179
YER055C	230.472	0.222125	0.273525	0.812082	0.416744	0.963011
YER056C	147.108	-0.387418	0.319079	-1.21417	0.224681	0.902266
YER056C-A	1096.02	0.127304	0.315082	0.404035	0.686187	0.995016
YER057C	350.13	0.0882851	0.297739	0.296519	0.766834	0.995016
YER058W	65.6566	0.721529	0.483749	1.49154	0.135821	0.826612
YER059W	68.4621	-0.0184604	0.313066	-0.0589665	0.952979	0.998211
YER060W	17.5899	-0.465108	0.481573	-0.965809	0.33414	0.960815
YER060W-A	3.59386	-0.118524	1.01121	-0.11721	0.906694	0.9976
YBL045C	586.069	-0.983809	0.320236	-3.07214	0.00212532	0.162979
YER061C	25.5337	0.394262	0.439907	0.896241	0.370124	0.963011
YER062C	125.509	-0.401723	0.327417	-1.22695	0.219843	0.90098
YER063W	130.641	0.0399503	0.295983	0.134975	0.892631	0.995016
YER064C	186.834	0.0475503	0.289955	0.163992	0.869738	0.995016
YER065C	45.8546	0.140431	0.383194	0.366475	0.714011	0.995016
YER066W	11.8971	0.157981	0.574266	0.275101	0.783239	0.995016
YER067W	1121.51	-0.724159	0.947775	-0.764062	0.444831	0.963763
YER068W	120.865	-0.0667198	0.296854	-0.224756	0.822169	0.995016
YER069W	29.5631	0.0764343	0.455282	0.167883	0.866675	0.995016
YBL044W	0.795311	1.86222	2.11532	0.880349	0.37867	0.963011
YER070W	382.567	-0.531735	0.338184	-1.57233	0.115875	0.817319
YER071C	25.5289	-0.0770973	0.45669	-0.168818	0.86594	0.995016
YER072W	1129.79	0.186763	0.295812	0.631356	0.527808	0.982052
YER073W	80.5963	-0.265598	0.350344	-0.758107	0.448387	0.966042
YER074W	830.27	-0.083176	0.290147	-0.286669	0.774366	0.995016
YER074W-A	90.5756	-0.201378	0.388047	-0.518952	0.603794	0.991182
YER075C	64.6952	0.00541449	0.36326	0.0149053	0.988108	0.999774
YER076C	19.0637	0.503759	0.489401	1.02934	0.303321	0.946855
YER077C	53.8405	0.18294	0.398056	0.459585	0.645814	0.995016
YBL043W	14.296	-0.189728	0.54839	-0.345973	0.729363	0.995016
YER078C	60.586	-0.18159	0.37772	-0.480754	0.630691	0.991182
YER079W	83.3037	-0.464121	0.338161	-1.37249	0.169912	0.860344
YER080W	241.446	-0.138291	0.275655	-0.501681	0.615892	0.991182
YER081W	53.7371	-0.318927	0.367945	-0.86678	0.386062	0.963011
YER082C	98.5172	0.723154	0.42809	1.68926	0.0911698	0.791567
YER083C	187.713	0.280381	0.283556	0.988806	0.322758	0.960815
YER084W	10.9224	0.549256	0.607921	0.9035	0.366261	0.963011
YER085C	0.318312	0.265373	2.98948	0.0887691	0.929265	0.997602
YBL042C	49.5453	0.0360834	0.356705	0.101158	0.919425	0.997602
YER086W	256.449	-0.0283264	0.273262	-0.10366	0.917439	0.997602
YER087W	37.8621	-0.0505283	0.361987	-0.139586	0.888987	0.995016
YER087C-B	184.783	0.153079	0.31043	0.49312	0.621928	0.991182
YER088C	369.422	-0.0181459	0.359891	-0.0504206	0.959787	0.998987
YER089C	314.3	0.162788	0.306632	0.530888	0.595496	0.991182
YER090W	147.994	-0.318085	0.338714	-0.939096	0.347681	0.960815
YER091C	329.445	0.952822	1.10528	0.862063	0.388653	0.963011
YER092W	68.1485	0.822702	0.341569	2.4086	0.0160139	0.433158
YER093C	47.3895	0.195423	0.403443	0.484389	0.62811	0.991182
YER093C-A	37.0282	-0.211651	0.398205	-0.531513	0.595063	0.991182
YBL041W	230.858	0.018589	0.2666	0.0697264	0.944411	0.997602
YER094C	322.867	0.114525	0.273494	0.41875	0.675399	0.995016
YER095W	111.353	0.386364	0.358046	1.07909	0.280547	0.938169
YER096W	4.17125	1.35192	0.919987	1.4695	0.141698	0.829131
YER098W	34.7288	-0.531228	0.387726	-1.37011	0.170652	0.860344
YER099C	99.0086	0.0774242	0.323493	0.239338	0.810843	0.995016
YER100W	145.458	0.218475	0.316474	0.690339	0.489981	0.976359
YER101C	26.149	-0.683655	0.435187	-1.57094	0.116196	0.817319
YER102W	2505.65	-0.0384515	0.268409	-0.143257	0.886087	0.995016
YER103W	87.6467	-0.903849	0.493838	-1.83025	0.0672119	0.746885
YAL053W	113.316	0.116036	0.327672	0.354121	0.723248	0.995016
YBL040C	101.61	0.387874	0.36434	1.06459	0.28706	0.942729
YER104W	28.1806	0.371457	0.416865	0.891073	0.37289	0.963011
YER105C	93.2561	-0.369203	0.331445	-1.11392	0.265314	0.929796
YER106W	1.13319	2.60076	1.81075	1.43628	0.150922	0.845727
YER107C	60.3616	0.0632161	0.374346	0.168871	0.865898	0.995016
YER109C	37.2352	0.460672	0.413116	1.11511	0.264801	0.929796
YER110C	350.779	0.0176809	0.304069	0.0581478	0.953631	0.998211
YER111C	53.6457	-0.160454	0.36776	-0.436299	0.66262	0.995016
YER112W	121.088	0.170714	0.319688	0.534002	0.59334	0.991182
YER113C	64.1725	-0.429864	0.323834	-1.32742	0.184369	0.86829
YER114C	117.603	0.0150573	0.388675	0.0387399	0.969098	0.999774
YBL039W-B	13.2785	-0.531876	0.759974	-0.69986	0.484014	0.974707
YER115C	24.7263	-0.0488737	0.424366	-0.115169	0.908311	0.9976
YER116C	65.6658	0.321393	0.354633	0.906269	0.364793	0.963011
YER117W	668.199	-0.163623	0.325955	-0.50198	0.615682	0.991182
YER118C	160.332	0.169208	0.292619	0.578252	0.563094	0.987278
YER119C	68.7848	-0.118288	0.334533	-0.353592	0.723645	0.995016
YER120W	487.054	-0.170853	0.261313	-0.653826	0.513224	0.979757
YER121W	14.5219	-0.37567	0.509348	-0.737552	0.460787	0.966149
YER122C	354.195	-0.185983	0.293516	-0.633637	0.526318	0.982052
YER123W	106.536	-0.115632	0.287506	-0.402189	0.687545	0.995016
YER124C	184.925	-0.723505	0.275117	-2.62981	0.00854322	0.337372
YBL039C	200.446	0.44067	0.338584	1.30151	0.193085	0.878598
YER125W	168.222	-0.391647	0.289819	-1.35135	0.176584	0.865801
YER126C	349.25	0.704923	0.35355	1.99384	0.046169	0.651508
YER127W	120.646	0.742109	0.375574	1.97594	0.0481621	0.666719
YER128W	20.5323	0.239625	0.462783	0.517792	0.604604	0.991182
YER129W	129.223	0.171597	0.288844	0.594082	0.552457	0.985673
YER130C	43.1793	-0.0672075	0.423369	-0.158744	0.87387	0.995016
YER131W	1384.35	0.222038	0.331997	0.668795	0.503626	0.979518
YER132C	66.4358	0.33689	0.353457	0.953128	0.340525	0.960815
YBL038W	102.772	0.276624	0.320787	0.86233	0.388506	0.963011
YER133W	694.626	1.43622	0.283396	5.06789	4.02239e-07	0.000234425
YER134C	164.877	1.49049	0.342855	4.34728	1.37835e-05	0.00593609
YER136W	544.388	1.42528	0.270908	5.26111	1.43186e-07	0.000113882
YER137C	49.8293	2.3936	0.428166	5.59036	2.26595e-08	2.64119e-05
YER138C	178.183	0.82593	0.335008	2.4654	0.013686	0.425494
YBL037W	75.7296	-0.207289	0.32834	-0.631325	0.527828	0.982052
YER137C-A	59.5885	0.961838	0.358104	2.68592	0.00723304	0.31935
YER138W-A	32.3952	-0.548266	1.14031	-0.480805	0.630655	0.991182
YER139C	26.5453	-0.339847	0.452453	-0.751122	0.45258	0.966149
YER140W	38.9602	-0.656527	0.369928	-1.77474	0.0759404	0.75924
YER141W	179.421	-0.500917	0.356023	-1.40698	0.159433	0.852859
YER142C	33.7941	0.129622	0.41663	0.31112	0.75571	0.995016
YER143W	84.6397	-0.0553208	0.318003	-0.173964	0.861894	0.995016
YER144C	60.9025	0.190039	0.352672	0.538855	0.589987	0.991182
YER145C	848.334	0.0629515	0.388006	0.162244	0.871114	0.995016
YER146W	154.426	0.378877	0.301434	1.25691	0.208785	0.887987
YBL036C	121.498	0.588949	0.340801	1.72813	0.0839648	0.778659
YER147C	52.2086	0.448083	0.391434	1.14472	0.252324	0.920816
YER148W	146.627	0.173782	0.289109	0.601095	0.547777	0.985673
YER149C	51.2443	-0.0782827	0.360277	-0.217284	0.827987	0.995016
YER150W	91.2274	-2.33507	0.538056	-4.33982	1.42596e-05	0.00593609
YER151C	138.777	0.18553	0.309582	0.599294	0.548977	0.985673
YER152C	68.904	0.23933	0.357956	0.668601	0.50375	0.979518
YER153C	16.3461	0.636159	0.591637	1.07525	0.282262	0.938169
YER154W	103.728	0.552774	0.354558	1.55905	0.118984	0.817319
YER155C	131.529	-0.410643	0.327162	-1.25517	0.209417	0.887987
YBL035C	48.4934	0.161557	0.362373	0.445831	0.655719	0.995016
YER156C	281.779	0.0443132	0.279542	0.158521	0.874046	0.995016
YER157W	44.8748	-0.467636	0.363557	-1.28628	0.198345	0.88439
YER158C	57.4414	-0.131344	0.3652	-0.35965	0.719109	0.995016
YER159C	263.034	0.746687	0.357371	2.08939	0.0366725	0.585554
YER160C	420.088	0.537379	0.316808	1.69623	0.0898426	0.790941
YER159C-A	12.9225	0.448588	0.556472	0.806128	0.420169	0.963011
YER161C	175.099	0.995411	0.351317	2.83337	0.004606	0.244034
YER162C	40.3519	0.48064	0.381965	1.25833	0.208271	0.887987
YBL034C	25.8647	0.0577648	0.417662	0.138305	0.889999	0.995016
YER163C	62.9647	0.347377	0.336502	1.03232	0.301923	0.946855
YER164W	125.378	0.103491	0.35379	0.292521	0.769889	0.995016
YER165W	840.821	-0.0043557	0.297862	-0.0146232	0.988333	0.999774
YER166W	172.4	-0.045794	0.304148	-0.150565	0.880319	0.995016
YER167W	92.2068	-0.142873	0.349245	-0.409092	0.682472	0.995016
YER168C	54.9764	-0.0972294	0.337131	-0.288403	0.773039	0.995016
YER169W	61.2829	-0.0768788	0.351986	-0.218415	0.827106	0.995016
YER170W	47.9346	0.00808295	0.34379	0.0235113	0.981242	0.999774
YER171W	86.8527	-0.265553	0.316492	-0.839049	0.401442	0.963011
YER172C	77.2547	-0.0695861	0.321949	-0.21614	0.828879	0.995016
YBL033C	112.942	1.01154	0.391066	2.58663	0.00969195	0.362081
YER173W	40.9228	-0.00723495	0.368859	-0.0196144	0.984351	0.999774
YER174C	59.9228	-0.399659	0.425542	-0.939175	0.347641	0.960815
YER175C	62.8027	0.109528	0.396591	0.276174	0.782414	0.995016
YER175W-A	0.174342	-0.696415	4.03603	-0.17255	0.863006	0.995016
YER176W	79.2636	0.755608	0.350881	2.15346	0.0312828	0.552213
YER177W	4193.99	-0.624065	0.329765	-1.89246	0.0584304	0.707967
YER178W	771.918	-0.365377	0.30573	-1.1951	0.23205	0.910657
YER179W	3.39796	-0.346816	0.986498	-0.351563	0.725166	0.995016
YER180C	23.8581	-0.254965	0.437627	-0.582608	0.560157	0.985673
YER180C-A	17.2942	0.462008	0.486578	0.949503	0.342365	0.960815
YBL032W	448.138	0.00369541	0.26053	0.0141842	0.988683	0.999774
YER182W	50.6085	-0.204099	0.378714	-0.538927	0.589938	0.991182
YER183C	37.8053	-0.114048	0.390293	-0.292211	0.770126	0.995016
YER184C	11.7064	0.314716	0.567397	0.554667	0.579123	0.991182
YER185W	2.69159	0.293315	1.05984	0.276755	0.781968	0.995016
YER186C	65.8103	-0.106613	0.369214	-0.288757	0.772768	0.995016
YER187W	5.81346	0.163412	0.752885	0.217048	0.828171	0.995016
YER188C-A	5.93034	-0.16455	0.802267	-0.205106	0.837489	0.995016
YER189W	2.58601	0.078514	1.15162	0.0681773	0.945645	0.997602
YER190W	33.5531	1.23537	0.539156	2.2913	0.021946	0.479031
YAL051W	44.5702	-0.292421	0.356989	-0.819132	0.412711	0.963011
YBL031W	48.8163	-0.0983256	0.358594	-0.274197	0.783933	0.995016
YFL067W	0.18619	1.22714	3.93361	0.311963	0.755068	0.995016
YFL066C	36.3313	1.21413	0.540591	2.24592	0.024709	0.51247
YFL065C	9.63523	0.583701	0.668817	0.872735	0.382807	0.963011
YFL064C	6.80014	0.348984	0.752862	0.463542	0.642976	0.993442
YFL062W	40.8785	0.228257	0.462352	0.493687	0.621528	0.991182
YFL061W	2.466	0.81936	1.13472	0.722082	0.470244	0.968894
YFL060C	28.7691	0.514472	0.408424	1.25965	0.207795	0.887987
YFL059W	54.1279	-0.118166	0.35112	-0.336542	0.736462	0.995016
YBL030C	1167.94	-0.892949	0.262052	-3.40752	0.000655549	0.0973046
YFL058W	2.41186	1.58322	1.19309	1.32699	0.184513	0.86829
YFL056C	25.4669	0.096195	0.417271	0.230534	0.817677	0.995016
YFL055W	9.67763	1.13898	0.754983	1.50862	0.131396	0.825015
YFL054C	30.76	0.706618	0.466284	1.51542	0.129665	0.825015
YFL053W	0.24859	1.22715	3.53502	0.347141	0.728486	0.995016
YFL052W	17.6594	0.0066362	0.505072	0.0131391	0.989517	0.999774
YFL050C	23.6112	-0.371244	0.435066	-0.853304	0.393491	0.963011
YFL049W	69.9095	0.0782359	0.320627	0.244009	0.807224	0.995016
YFL048C	127.023	-0.0915499	0.311988	-0.29344	0.769186	0.995016
YBL029C-A	22.4071	-0.182601	0.492943	-0.37043	0.711062	0.995016
YFL047W	90.9594	-0.023475	0.325608	-0.0720959	0.942526	0.997602
YFL046W	104.863	0.154475	0.314112	0.491782	0.622873	0.991182
YFL045C	630.042	-0.11013	0.305141	-0.360915	0.718163	0.995016
YFL044C	82.5127	-0.0307065	0.302291	-0.101579	0.919091	0.997602
YFL042C	106.467	0.0375343	0.340707	0.110166	0.912278	0.997602
YFL041W-A	2.02132	-2.20411	1.46182	-1.50778	0.131611	0.825015
YFL041W	107.329	-0.109175	0.352519	-0.309699	0.75679	0.995016
YFL040W	0.24859	1.22715	3.53502	0.347141	0.728486	0.995016
YFL039C	1815.57	-0.43146	0.317894	-1.35725	0.174703	0.862521
YFL038C	1076.56	-0.11455	0.283504	-0.404051	0.686175	0.995016
YBL029W	9.39154	-0.6867	0.705116	-0.973883	0.330115	0.960815
YFL037W	562.033	-0.10865	0.262871	-0.41332	0.679372	0.995016
YFL036W	99.358	-0.507081	0.327329	-1.54915	0.121346	0.817319
YFL034C-B	52.3883	0.131117	0.367624	0.356661	0.721346	0.995016
YFL034C-A	120.145	-0.259064	0.319073	-0.811925	0.416835	0.963011
YFL034W	69.093	0.351324	0.41001	0.856866	0.391519	0.963011
YFL033C	107.759	-0.302818	0.303419	-0.998018	0.318271	0.957616
YFL031W	1028.3	0.416754	0.300661	1.38613	0.165708	0.856016
YFL030W	29.2064	-0.894558	0.411793	-2.17235	0.0298293	0.541577
YFL029C	55.6316	0.627811	0.38412	1.63441	0.102172	0.797358
YBL028C	197.962	0.496496	0.396103	1.25345	0.210041	0.887987
YFL028C	72.4257	0.210035	0.328214	0.639934	0.522215	0.981765
YFL027C	48.1973	-0.138653	0.358584	-0.386669	0.699001	0.995016
YFL026W	633.787	-1.28628	0.339409	-3.78975	0.000150796	0.0303048
YFL025C	33.7381	-0.0274946	0.385613	-0.071301	0.943158	0.997602
YFL024C	75.185	0.28885	0.345695	0.835565	0.4034	0.963011
YFL023W	81.6702	1.05982	0.455229	2.32811	0.0199062	0.460371
YFL022C	298.387	-0.145581	0.26788	-0.543455	0.586817	0.991182
YFL021W	67.5211	0.558146	0.369629	1.51002	0.131039	0.825015
YFL020C	0.958363	-3.23029	1.91006	-1.6912	0.0907979	0.791567
YBL027W	3480.87	0.0721064	0.284365	0.25357	0.799828	0.995016
YFL018C	733.579	-0.325474	0.257684	-1.26308	0.206562	0.887987
YFL017W-A	42.024	0.609004	0.390134	1.56101	0.118521	0.817319
YFL017C	70.835	0.395311	0.339194	1.16544	0.243841	0.916411
YFL016C	181.399	0.221713	0.311144	0.712574	0.476109	0.972393
YFL014W	93.3528	-3.64677	1.16257	-3.13682	0.00170792	0.149559
YFL013C	135.779	0.450466	0.346925	1.29845	0.194132	0.878693
YFL012W	0.722318	-2.85922	2.07039	-1.381	0.167278	0.859335
YFL011W	17.9982	1.34415	0.674854	1.99177	0.0463967	0.651566
YFL010W-A	0.174342	-0.696415	4.03603	-0.17255	0.863006	0.995016
YFL010C	312.392	0.95797	0.377102	2.54034	0.0110743	0.379654
YBL026W	102.417	0.0605771	0.344238	0.175975	0.860314	0.995016
YFL009W	58.8088	-0.527626	0.356204	-1.48124	0.138542	0.826612
YFL008W	80.2734	0.402163	0.313488	1.28287	0.199539	0.88439
YFL007W	159.156	-0.24106	0.308175	-0.78222	0.434085	0.963011
YFL005W	338.445	0.0515045	0.296399	0.173768	0.862048	0.995016
YFL004W	221.217	-0.20294	0.288563	-0.703279	0.481882	0.973562
YFL003C	2.34349	-1.10805	1.34136	-0.826064	0.408768	0.963011
YFL002W-A	64.424	-0.0912516	0.359387	-0.253909	0.799566	0.995016
YFL002W-B	28.9108	-0.08777	0.439932	-0.199508	0.841865	0.995016
YBL025W	27.519	0.385576	0.431061	0.894481	0.371064	0.963011
YFL002C	93.1942	0.161789	0.328329	0.492766	0.622178	0.991182
YFL001W	72.6508	0.136008	0.353712	0.384516	0.700596	0.995016
YFR001W	164.663	0.524865	0.316519	1.65824	0.0972686	0.797358
YFR002W	95.8173	-0.19448	0.32269	-0.602684	0.546719	0.985673
YFR003C	173.134	0.046723	0.294109	0.158863	0.873777	0.995016
YFR004W	197.727	-0.0732017	0.269028	-0.272097	0.785548	0.995016
YFR005C	53.4978	-0.202842	0.357141	-0.567961	0.570061	0.990379
YFR006W	302.184	-0.221023	0.277261	-0.797166	0.425355	0.963011
YFR007W	36.4912	-0.410514	0.386558	-1.06197	0.288248	0.942729
YBL024W	146.837	-0.187095	0.299047	-0.625639	0.531552	0.982052
YFR008W	34.2402	0.172527	0.379473	0.454649	0.649362	0.995016
YFR009W	287.505	0.047804	0.289657	0.165036	0.868915	0.995016
YFR010W	156.73	-0.36248	0.27866	-1.3008	0.193328	0.878693
YFR011C	116.51	-0.169026	0.29935	-0.564642	0.572317	0.990379
YFR012W	2.02102	0.295013	1.24753	0.236477	0.813062	0.995016
YFR012W-A	0.456966	-0.6968	2.48378	-0.28054	0.779063	0.995016
YFR013W	129.667	0.0102467	0.302637	0.033858	0.97299	0.999774
YFR014C	190.337	-0.402877	0.282023	-1.42853	0.15314	0.847862
YBL023C	85.2218	0.0724345	0.364969	0.198467	0.84268	0.995016
YFR015C	731.527	-1.0731	0.399062	-2.68906	0.00716532	0.31935
YFR016C	175.222	0.477995	0.309704	1.54339	0.122735	0.81931
YFR017C	267.588	-0.896816	0.336909	-2.66189	0.0077703	0.337372
YFR018C	107.186	0.501735	0.360984	1.38991	0.164556	0.855517
YFR019W	54.2777	-0.348539	0.382603	-0.910967	0.362313	0.963011
YFR020W	24.7853	-0.475887	0.471513	-1.00928	0.312842	0.951932
YFR021W	47.0972	-0.0271032	0.351797	-0.0770422	0.93859	0.997602
YFR022W	37.8296	0.301252	0.371944	0.809941	0.417974	0.963011
YAL049C	100.674	0.244778	0.311069	0.786894	0.431344	0.963011
YBL022C	165.899	-0.300533	0.325017	-0.924669	0.355138	0.962672
YFR023W	0.379606	2.13813	2.7771	0.769914	0.441351	0.963011
YFR024C-A	262.195	-0.0338518	0.274066	-0.123517	0.901698	0.996631
YFR025C	169.892	0.177264	0.289677	0.611935	0.540581	0.985673
YFR026C	7.29731	0.309263	0.670629	0.461153	0.644689	0.994756
YFR027W	24.4372	0.85809	0.48751	1.76015	0.0783829	0.75924
YFR028C	131.586	-0.0423101	0.363062	-0.116537	0.907227	0.9976
YFR029W	61.8527	0.404256	0.41839	0.966217	0.333936	0.960815
YBL021C	70.1395	0.876002	0.39747	2.20394	0.0275284	0.538374
YFR030W	125.128	0.842146	0.515613	1.63329	0.102407	0.797358
YFR031C	68.2717	0.285339	0.344565	0.828113	0.407606	0.963011
YFR031C-A	2426.97	-0.163152	0.253751	-0.642963	0.520248	0.980597
YFR032C	0.892304	-1.95474	1.91441	-1.02106	0.307224	0.946855
YFR032C-A	685.415	-0.53292	0.328316	-1.62319	0.104548	0.803521
YFR032C-B	11.0504	0.540861	0.579134	0.933913	0.350349	0.960971
YFR033C	1050.43	-0.274533	0.443451	-0.619082	0.535863	0.982956
YFR034C	103.581	1.44666	0.481103	3.00697	0.00263865	0.189111
YFR035C	0.18619	1.22714	3.93361	0.311963	0.755068	0.995016
YBL020W	77.5259	-0.557154	0.342341	-1.62748	0.103635	0.80104
YFR036W	70.9528	0.365401	0.471399	0.775141	0.438256	0.963011
YFR037C	443.4	0.619175	0.351384	1.7621	0.0780516	0.75924
YFR038W	49.897	-0.143096	0.384785	-0.371887	0.709977	0.995016
YFR039C	84.5562	0.264907	0.312192	0.848539	0.396138	0.963011
YFR040W	125.22	-0.147353	0.342523	-0.430199	0.667051	0.995016
YFR041C	53.9466	0.529848	0.33517	1.58083	0.113916	0.813606
YFR042W	35.1945	-0.243441	0.412754	-0.589797	0.555327	0.985673
YFR043C	25.529	0.31005	0.414533	0.747951	0.45449	0.966149
YFR044C	527.116	-0.401879	0.2861	-1.40468	0.160117	0.852859
YBL019W	19.5778	-0.0647622	0.468277	-0.138299	0.890004	0.995016
YFR045W	41.1842	-0.164232	0.423504	-0.387793	0.69817	0.995016
YFR046C	54.2823	0.393344	0.363083	1.08335	0.278655	0.938169
YFR047C	143.622	-0.123119	0.363878	-0.338352	0.735098	0.995016
YFR048W	45.928	-0.259366	0.372245	-0.696762	0.485952	0.975031
YFR049W	73.1416	-0.674876	0.396761	-1.70096	0.08895	0.790941
YFR050C	266.291	-0.0816162	0.265884	-0.306961	0.758873	0.995016
YFR051C	358.531	-0.271388	0.255094	-1.06387	0.287386	0.942729
YFR052W	189.832	-0.318631	0.344407	-0.925158	0.354884	0.962494
YFR053C	7484.09	-0.153831	0.358938	-0.428573	0.668234	0.995016
YFR055W	25.7376	0.523968	0.473756	1.10599	0.268733	0.931903
YBL018C	32.8085	0.44979	0.397933	1.13031	0.258344	0.926471
YGL263W	10.3024	1.81418	2.31292	0.784367	0.432825	0.963011
YGL262W	0.131016	1.22714	4.08047	0.300734	0.763617	0.995016
YGL261C	1.81616	2.42191	1.70218	1.42283	0.154786	0.847862
YGL259W	3.2283	-0.154436	1.01868	-0.151604	0.879499	0.995016
YGL258W-A	1.2886	-0.333785	1.58543	-0.210532	0.833252	0.995016
YGL258W	1.03406	0.458018	1.84275	0.248552	0.803708	0.995016
YGL257C	65.031	-0.25312	0.318312	-0.795193	0.426501	0.963011
YGL256W	61.3026	-0.192051	0.326182	-0.588786	0.556005	0.985673
YBL017C	240.325	-0.389076	0.268649	-1.44827	0.147541	0.844466
YGL255W	26.5442	-0.24338	0.455485	-0.534331	0.593113	0.991182
YGL254W	36.4846	0.0321333	0.403573	0.0796221	0.936538	0.997602
YGL253W	1500.07	0.187459	0.334582	0.560278	0.57529	0.991182
YGL252C	136.574	0.0555805	0.289015	0.19231	0.8475	0.995016
YGL251C	18.5755	-0.420244	0.475738	-0.883351	0.377047	0.963011
YGL250W	33.704	-0.351383	0.445023	-0.789583	0.429771	0.963011
YGL249W	2.85545	-0.433236	1.16019	-0.373418	0.708838	0.995016
YGL248W	89.7705	-0.104995	0.327619	-0.320481	0.748604	0.995016
YGL247W	23.9173	0.324822	0.550588	0.589955	0.555221	0.985673
YBL016W	120.095	-0.0553724	0.320131	-0.172968	0.862676	0.995016
YGL246C	65.9254	0.204273	0.336178	0.607634	0.54343	0.985673
YGL245W	1146.82	-0.183795	0.260579	-0.705332	0.480604	0.973201
YGL244W	269.684	0.387219	0.331142	1.16934	0.242265	0.915048
YGL243W	34.0514	0.191449	0.395786	0.483718	0.628586	0.991182
YGL242C	91.4513	0.3766	0.336127	1.12041	0.262539	0.929796
YGL241W	41.1996	-0.113933	0.361998	-0.314734	0.752963	0.995016
YGL240W	5.61694	-0.451826	0.773991	-0.583762	0.559381	0.985673
YGL238W	111.114	-0.525311	0.343265	-1.53034	0.125933	0.821877
YGL237C	70.9377	0.566076	0.386829	1.46338	0.143365	0.836332
YGL236C	65.0501	0.0784085	0.361697	0.21678	0.82838	0.995016
YBL015W	199.871	-1.70111	0.405092	-4.19932	2.67721e-05	0.00917812
YGL235W	0.131016	1.22714	4.08047	0.300734	0.763617	0.995016
YGL234W	187.019	-0.210168	0.30328	-0.692983	0.48832	0.975973
YGL233W	90.7301	-0.615806	0.302988	-2.03244	0.0421089	0.621934
YGL232W	76.9772	-0.02128	0.347951	-0.0611581	0.951233	0.997964
YGL231C	145.285	0.0564294	0.293235	0.192438	0.847399	0.995016
YGL230C	1.74708	1.63798	1.39498	1.17419	0.240317	0.913465
YGL229C	32.2475	-0.398768	0.471692	-0.8454	0.397888	0.963011
YGL228W	265.805	0.179461	0.306651	0.585228	0.558395	0.985673
YGL227W	65.3718	0.253616	0.356993	0.710423	0.477442	0.973201
YGL226C-A	86.6008	0.0312756	0.350525	0.0892249	0.928903	0.997602
YGL226W	110.73	1.1752	0.462133	2.54299	0.0109908	0.379654
YGL225W	175.821	-0.50467	0.306948	-1.64415	0.100145	0.797358
YGL224C	80.1847	0.000707082	0.311581	0.00226934	0.998189	0.999774
YGL223C	81.0171	-0.154046	0.330414	-0.46622	0.641058	0.993441
YGL222C	84.6739	-0.11202	0.340682	-0.328811	0.742299	0.995016
YGL221C	226.967	0.18433	0.311803	0.591173	0.554404	0.985673
YGL220W	183.808	0.618198	0.361653	1.70937	0.0873825	0.789328
YGL219C	148.135	-0.159903	0.301982	-0.52951	0.596452	0.991182
YGL216W	75.5845	-0.229955	0.348638	-0.65958	0.509523	0.979757
YGL215W	221.152	0.19722	0.284707	0.692714	0.488489	0.975973
YGL213C	92.044	-0.227334	0.345159	-0.658635	0.51013	0.979757
YGL212W	35.319	0.434825	0.405276	1.07291	0.283311	0.938169
YGL211W	61.8792	0.418515	0.370066	1.13092	0.258088	0.926194
YGL210W	134.122	0.778143	0.331626	2.34645	0.0189534	0.456793
YGL209W	3.82606	0.732793	0.952991	0.76894	0.441929	0.963011
YGL208W	59.9423	0.491874	0.339218	1.45002	0.147052	0.844466
YGL207W	183.451	0.0369834	0.319887	0.115614	0.907958	0.9976
YGL206C	184.196	-0.436435	0.329966	-1.32267	0.185946	0.869375
YGL205W	8.2414	0.863896	0.675838	1.27826	0.201158	0.885103
YAL067C	5.8243	1.81541	1.8755	0.967958	0.333065	0.960815
YAL048C	24.025	-0.712942	0.440939	-1.61687	0.105906	0.803521
YBL014C	45.1961	0.337272	0.368165	0.91609	0.35962	0.963011
YGL204C	12.8653	-0.118211	0.609013	-0.194102	0.846096	0.995016
YGL203C	185.834	0.498383	0.319771	1.55856	0.1191	0.817319
YGL202W	354.564	-0.338519	0.270051	-1.25354	0.210011	0.887987
YGL201C	85.5032	0.0426244	0.347689	0.122593	0.902429	0.996657
YGL200C	451.996	-0.0325849	0.25502	-0.127774	0.898328	0.995682
YGL198W	124.111	-0.47734	0.296501	-1.60991	0.107418	0.803521
YGL197W	120.033	-0.167532	0.28827	-0.581164	0.56113	0.985673
YBL013W	2.65773	0.721117	1.13735	0.634034	0.526059	0.982052
YGL196W	118.143	-0.492151	0.328727	-1.49714	0.134357	0.826612
YGL195W	226.313	-0.21559	0.285321	-0.755606	0.449886	0.966149
YGL194C-A	21.2166	0.00524075	0.541456	0.009679	0.992277	0.999774
YGL194C	45.6321	-0.181596	0.358772	-0.506159	0.612745	0.991182
YGL193C	16.3287	-0.585007	0.492109	-1.18878	0.234528	0.910657
YGL192W	0.18619	1.22714	3.93361	0.311963	0.755068	0.995016
YGL191W	203.137	-0.817977	0.395144	-2.07008	0.0384453	0.590879
YGL190C	103.504	-0.352928	0.33442	-1.05534	0.291268	0.943818
YGL189C	2611.24	-0.156877	0.250284	-0.626796	0.530793	0.982052
YBL011W	128.145	0.259387	0.315194	0.822943	0.41054	0.963011
YGL188C-A	24.0109	0.253324	0.493119	0.513716	0.60745	0.991182
YGL187C	180.676	-0.988326	0.380576	-2.59692	0.00940634	0.358059
YGL186C	66.2908	0.00167123	0.319073	0.00523778	0.995821	0.999774
YGL185C	49.5522	0.246053	0.347353	0.708366	0.478718	0.973201
YGL184C	27.8401	3.60315	1.55839	2.3121	0.0207722	0.473148
YGL183C	1.4108	0.518135	1.46356	0.354024	0.723321	0.995016
YGL181W	153.976	0.378631	0.314318	1.20461	0.228353	0.902266
YGL180W	23.1008	0.0583387	0.463396	0.125894	0.899816	0.996036
YGL179C	33.6633	0.534731	0.394058	1.35698	0.174786	0.862521
YGL178W	56.6038	-0.382696	0.352414	-1.08593	0.277511	0.938169
YBL010C	43.2993	0.619894	0.365615	1.69548	0.0899838	0.790989
YGL176C	32.3518	-0.333432	0.435806	-0.765092	0.444217	0.963763
YGL175C	20.9043	-0.589792	0.467893	-1.26053	0.207479	0.887987
YGL174W	54.6449	0.524067	0.367489	1.42608	0.153847	0.847862
YGL173C	392.761	-0.087845	0.287837	-0.30519	0.760221	0.995016
YGL172W	125.408	-0.0185303	0.314192	-0.0589776	0.95297	0.998211
YGL171W	83.7637	0.641936	0.450732	1.42421	0.154386	0.847862
YGL170C	0.151608	-0.696415	4.08047	-0.17067	0.864483	0.995016
YGL169W	51.5633	-0.084738	0.355746	-0.238198	0.811727	0.995016
YGL168W	1.17437	0.586662	1.60817	0.3648	0.71526	0.995016
YBL009W	51.215	-0.0596649	0.359271	-0.166072	0.8681	0.995016
YGL167C	179.035	-0.183785	0.310196	-0.592479	0.55353	0.985673
YGL166W	52.6208	0.922869	0.414873	2.22446	0.0261174	0.524869
YGL164C	121.18	0.603989	0.357181	1.69099	0.0908393	0.791567
YGL163C	41.2973	0.19638	0.382851	0.512942	0.607992	0.991182
YGL162W	28.481	-0.175353	0.407169	-0.430665	0.666712	0.995016
YGL161C	194.89	0.0405236	0.300836	0.134704	0.892846	0.995016
YGL160W	80.7772	-0.0824656	0.352159	-0.234172	0.814852	0.995016
YGL159W	26.8561	-0.143537	0.435028	-0.329948	0.741439	0.995016
YGL158W	0.962652	0.405254	1.88654	0.214814	0.829913	0.995016
YBL008W-A	1.3103	-1.70074	1.63916	-1.03756	0.299473	0.946855
YGL157W	4.34145	0.0846091	0.888795	0.0951952	0.92416	0.997602
YGL156W	56.1145	0.014308	0.504979	0.0283338	0.977396	0.999774
YGL155W	79.2436	-0.366179	0.307166	-1.19212	0.233214	0.910657
YGL154C	20.6378	0.482258	0.471012	1.02388	0.305894	0.946855
YGL153W	98.5336	0.19186	0.327572	0.585703	0.558075	0.985673
YGL151W	68.199	0.207477	0.347022	0.59788	0.54992	0.985673
YGL150C	135.959	0.250049	0.323919	0.771949	0.440145	0.963011
YGL148W	603.128	0.201871	0.286334	0.705022	0.480796	0.973201
YGL147C	1404.76	0.00273282	0.315104	0.00867274	0.99308	0.999774
YGL146C	32.5577	-0.175482	0.401311	-0.437273	0.661913	0.995016
YBL008W	36.4224	0.0138847	0.416222	0.0333588	0.973388	0.999774
YGL145W	45.2732	-0.541696	0.366775	-1.47692	0.139698	0.826612
YGL144C	23.2775	0.0337174	0.435224	0.0774713	0.938249	0.997602
YGL143C	55.7367	-0.088602	0.33305	-0.266032	0.790214	0.995016
YGL142C	63.6024	-0.383481	0.402051	-0.953812	0.340179	0.960815
YGL141W	55.5821	-0.344675	0.340163	-1.01326	0.310934	0.949546
YGL140C	94.8317	-0.0997478	0.328439	-0.303703	0.761354	0.995016
YGL139W	78.239	0.155275	0.312994	0.496096	0.619827	0.991182
YGL137W	397.702	-0.00526911	0.268017	-0.0196597	0.984315	0.999774
YGL136C	34.521	-0.170212	0.431136	-0.394799	0.692992	0.995016
YBL007C	316.537	-0.151252	0.283132	-0.534208	0.593197	0.991182
YGL135W	1804.86	-0.369988	0.282664	-1.30893	0.190558	0.873904
YGL134W	151.23	0.265684	0.282593	0.940164	0.347134	0.960815
YGL133W	37.4045	0.578919	0.386745	1.4969	0.134419	0.826612
YGL131C	44.4647	0.347199	0.352713	0.984369	0.324934	0.960815
YGL130W	106.188	0.101861	0.305428	0.333503	0.738754	0.995016
YGL129C	110.266	-0.22639	0.284224	-0.796519	0.42573	0.963011
YGL128C	50.2736	0.146691	0.364207	0.402768	0.687119	0.995016
YGL127C	88.6897	0.0880672	0.358312	0.245783	0.80585	0.995016
YGL126W	53.9264	-0.0502392	0.373153	-0.134634	0.892901	0.995016
YGL125W	25.8945	0.6416	0.464674	1.38075	0.167355	0.859335
YBL006C	148.097	0.612772	0.351696	1.74233	0.0814501	0.770603
YGL124C	38.7409	0.106328	0.362485	0.293331	0.769269	0.995016
YGL123W	3408.08	-0.259921	0.244942	-1.06115	0.288621	0.942729
YGL122C	301.398	0.0844143	0.371462	0.227249	0.82023	0.995016
YGL121C	88.6856	-0.853959	0.944495	-0.904143	0.36592	0.963011
YGL120C	293.928	-0.0524129	0.342616	-0.152978	0.878415	0.995016
YGL119W	51.3921	-0.0783447	0.351473	-0.222904	0.82361	0.995016
YGL117W	25.7381	-0.207846	0.503558	-0.412754	0.679787	0.995016
YGL116W	70.9418	-0.261517	0.317915	-0.822601	0.410735	0.963011
YGL115W	162.422	-0.382019	0.34365	-1.11165	0.266288	0.931528
YBL005W	34.2405	0.00118071	0.415622	0.00284083	0.997733	0.999774
YGL114W	45.8164	-0.189305	0.360309	-0.525396	0.599308	0.991182
YGL113W	41.5832	0.311342	0.414791	0.750601	0.452893	0.966149
YGL112C	124.514	-0.05875	0.288688	-0.203507	0.838739	0.995016
YGL111W	104.639	0.202226	0.394892	0.512105	0.608577	0.991182
YGL110C	64.7467	0.409097	0.325794	1.25569	0.209228	0.887987
YGL108C	91.0123	0.548707	0.361733	1.51689	0.129295	0.825015
YGL107C	78.7112	-0.437872	0.337728	-1.29652	0.194796	0.878693
YGL106W	353.725	0.449663	0.338526	1.3283	0.184079	0.86829
YGL105W	1059.81	-0.0781674	0.27969	-0.279479	0.779877	0.995016
YGL104C	40.6642	-0.825029	0.469514	-1.7572	0.078884	0.75924
YAL047C	24.6707	0.126085	0.463976	0.27175	0.785814	0.995016
YBL005W-B	523.03	0.115771	0.322745	0.358707	0.719814	0.995016
YGL103W	3832.71	0.230431	0.297899	0.773522	0.439213	0.963011
YGL101W	115.739	-0.0721713	0.338608	-0.213141	0.831217	0.995016
YGL100W	215.554	-0.173371	0.341262	-0.50803	0.611432	0.991182
YGL099W	102.799	0.261845	0.380306	0.688512	0.49113	0.976359
YGL098W	30.0515	-0.069172	0.407362	-0.169805	0.865164	0.995016
YGL097W	116.53	0.358416	0.338907	1.05756	0.290254	0.943818
YGL096W	20.0886	-0.656543	0.66218	-0.991488	0.321447	0.958749
YBL005W-A	113.313	-0.297327	0.417811	-0.711629	0.476695	0.973038
YGL095C	112.049	-0.0530219	0.285504	-0.185713	0.85267	0.995016
YGL094C	112.319	-0.159172	0.309171	-0.514835	0.606668	0.991182
YGL093W	41.8207	-0.126319	0.376411	-0.335589	0.737181	0.995016
YGL092W	76.5314	-0.291339	0.320949	-0.907742	0.364014	0.963011
YGL091C	40.8078	-0.00239256	0.36828	-0.00649659	0.994817	0.999774
YGL090W	48.4477	0.713921	0.363115	1.9661	0.0492868	0.674775
YGL087C	95.9166	0.0463642	0.333554	0.139001	0.889449	0.995016
YGL086W	64.3039	0.40542	0.321305	1.26179	0.207024	0.887987
YGL085W	20.6917	-0.289136	0.492943	-0.58655	0.557506	0.985673
YGL084C	80.9897	-0.472319	0.325926	-1.44916	0.147293	0.844466
YGL083W	50.6195	-0.377694	0.364235	-1.03695	0.299758	0.946855
YGL082W	98.8955	-0.18687	0.298319	-0.62641	0.531046	0.982052
YGL081W	13.2452	-0.420927	0.620215	-0.678679	0.497341	0.978551
YGL080W	115.027	0.103355	0.299357	0.345256	0.729902	0.995016
YGL079W	24.9613	-0.0267507	0.438792	-0.0609645	0.951387	0.997964
YGL078C	214.951	0.00173531	0.345681	0.00501997	0.995995	0.999774
YGL077C	124.287	-0.0520515	0.31506	-0.165211	0.868778	0.995016
YGL076C	1840.42	-0.290716	0.239802	-1.21232	0.22539	0.902266
YBL004W	100.983	0.10722	0.349142	0.307094	0.758772	0.995016
YGL075C	14.046	-0.596538	0.598486	-0.996746	0.318888	0.957727
YGL073W	100.855	0.136174	0.391254	0.348045	0.727807	0.995016
YGL071W	121.642	0.324436	0.382509	0.848179	0.396338	0.963011
YGL070C	72.2925	-0.0277951	0.360382	-0.0771269	0.938523	0.997602
YGL068W	173.613	-0.36392	0.289291	-1.25797	0.208402	0.887987
YGL067W	118.997	-0.184682	0.300333	-0.614922	0.538606	0.98432
YGL066W	84.2545	0.624366	0.377323	1.65473	0.0979799	0.797358
YGL065C	55.3657	-0.332417	0.341519	-0.97335	0.330379	0.960815
YBL003C	607.001	-0.189152	0.30933	-0.611491	0.540874	0.985673
YGL064C	32.1417	0.626981	0.390474	1.60569	0.108342	0.803521
YGL063W	15.223	0.626482	0.54008	1.15998	0.246058	0.91781
YGL062W	270.569	-0.706028	0.265675	-2.65749	0.00787245	0.337372
YGL061C	56.664	0.623659	0.356412	1.74983	0.0801483	0.761998
YGL060W	41.0078	-0.378778	0.3919	-0.966517	0.333785	0.960815
YGL059W	33.121	-0.535324	0.403565	-1.32649	0.184679	0.86829
YGL058W	107.398	0.33226	0.306413	1.08435	0.278208	0.938169
YGL057C	29.6	-0.130178	0.40013	-0.325339	0.744925	0.995016
YGL056C	174.231	-0.02492	0.321105	-0.077607	0.938141	0.997602
YGL055W	1351.73	-0.630028	0.861356	-0.731438	0.464512	0.967121
YBL002W	556.07	-0.263623	0.364525	-0.723197	0.469559	0.968894
YGL054C	265.745	-0.235987	0.333077	-0.708507	0.478631	0.973201
YGL053W	103.225	-0.305528	0.31913	-0.957378	0.338376	0.960815
YGL051W	4.57979	0.35446	0.842536	0.420707	0.673969	0.995016
YGL050W	53.2497	0.352373	0.355234	0.991946	0.321224	0.958573
YGL049C	120.624	-0.0676632	0.292453	-0.231364	0.817032	0.995016
YGL048C	281.656	0.0553343	0.255695	0.216407	0.82867	0.995016
YGL047W	30.8878	0.0719219	0.432573	0.166265	0.867948	0.995016
YBL001C	442.889	-0.063459	0.354581	-0.178969	0.857962	0.995016
YGL045W	51.3437	-0.385805	0.345449	-1.11682	0.264071	0.929796
YGL044C	55.8714	0.399807	0.381321	1.04848	0.294418	0.946424
YGL043W	160.433	0.270402	0.31337	0.862886	0.3882	0.963011
YGL041W-A	93.7574	-0.0916035	0.314104	-0.291634	0.770566	0.995016
YGL040C	166.082	-0.597315	0.282553	-2.11399	0.0345158	0.569049
YGL039W	90.3234	-0.0585846	0.449152	-0.130434	0.896223	0.995296
YGL038C	292.292	0.155145	0.290748	0.533606	0.593614	0.991182
YGL037C	730.421	-1.04229	0.42377	-2.45956	0.0139106	0.425494
YBR001C	93.4478	-0.075022	0.319339	-0.234929	0.814264	0.995016
YGL036W	81.8382	-0.380143	0.316513	-1.20104	0.229737	0.905893
YGL035C	190.208	0.540702	0.359868	1.5025	0.132968	0.826612
YGL033W	2.08965	-0.503707	2.87479	-0.175215	0.86091	0.995016
YGL032C	120.928	-1.37454	0.416933	-3.2968	0.000977933	0.1239
YGL031C	1187.87	-0.0557658	0.271239	-0.205596	0.837106	0.995016
YGL030W	795.145	-0.365831	0.277044	-1.32048	0.186675	0.869657
YGL029W	155.055	1.01989	0.384321	2.65374	0.00796048	0.337372
YGL028C	182.195	-0.253655	0.326284	-0.777407	0.436919	0.963011
YGL027C	188.719	0.209451	0.316971	0.660788	0.508748	0.979518
YBR002C	103.353	1.04993	0.397953	2.63832	0.00833173	0.337372
YGL026C	315.665	-0.000730978	0.272228	-0.00268517	0.997858	0.999774
YGL025C	84.7118	0.228378	0.439202	0.519984	0.603074	0.991182
YGL023C	205.802	1.04085	0.423936	2.4552	0.0140807	0.425494
YGL022W	322.215	0.0823398	0.337646	0.243864	0.807336	0.995016
YGL021W	100.378	-0.32834	0.34902	-0.940749	0.346833	0.960815
YGL020C	99.7332	0.033212	0.339988	0.0976857	0.922182	0.997602
YGL019W	213.359	0.232844	0.349675	0.665889	0.505482	0.979518
YGL018C	48.7448	0.549979	0.429774	1.27969	0.200653	0.884697
YGL017W	29.6076	-0.494609	0.409614	-1.2075	0.22724	0.902266
YGL016W	50.6905	-0.0104553	0.371866	-0.0281157	0.97757	0.999774
YBR003W	131.201	-0.572905	0.304412	-1.882	0.0598355	0.710097
YGL015C	0.523988	1.18775	2.55357	0.465134	0.641836	0.993441
YGL014W	118.623	-0.106116	0.32882	-0.322718	0.746909	0.995016
YGL013C	72.2878	-0.121587	0.345436	-0.35198	0.724853	0.995016
YGL012W	341.8	-0.000314525	0.303687	-0.00103569	0.999174	0.999774
YGL011C	343.729	-0.0600966	0.250621	-0.239791	0.810492	0.995016
YGL010W	13.2206	-0.456674	0.592366	-0.770933	0.440747	0.963011
YGL009C	132.412	-0.380879	0.343465	-1.10893	0.267461	0.931903
YGL008C	1869.27	-0.596584	0.280426	-2.12742	0.0333853	0.56234
YGL007C-A	1.07204	0.0560057	1.80399	0.0310455	0.975233	0.999774
YGL006W-A	1.98876	1.66783	1.34655	1.2386	0.215495	0.893827
YAL046C	40.8298	-0.0420663	0.369851	-0.113738	0.909445	0.9976
YBR004C	20.1701	-0.258648	0.534944	-0.483504	0.628738	0.991182
YGL006W	91.754	-0.262653	0.351142	-0.747998	0.454462	0.966149
YGL005C	120.236	0.37987	0.30337	1.25217	0.21051	0.887987
YGL004C	60.8445	0.200889	0.331565	0.605882	0.544593	0.985673
YGL003C	91.2625	0.196548	0.331811	0.592349	0.553617	0.985673
YGL002W	66.2863	-0.201574	0.414987	-0.485736	0.627155	0.991182
YGL001C	155.453	0.266775	0.360433	0.740152	0.459208	0.966149
YGR001C	184.503	0.430748	0.312619	1.37787	0.168244	0.859718
YGR002C	53.5081	0.135526	0.356781	0.379858	0.704051	0.995016
YGR003W	29.2215	0.169163	0.44584	0.379425	0.704372	0.995016
YGR004W	50.799	-0.0420134	0.357887	-0.117393	0.906548	0.9976
YBR005W	20.8696	0.673468	0.467236	1.44139	0.149476	0.845414
YGR005C	175.876	0.298329	0.322111	0.92617	0.354358	0.961899
YGR006W	20.3403	-0.0628232	0.473364	-0.132716	0.894418	0.995141
YGR007W	147.753	0.179179	0.301626	0.594044	0.552483	0.985673
YGR008C	676.97	-0.589967	0.469375	-1.25692	0.208783	0.887987
YGR009C	173.811	0.463599	0.323642	1.43244	0.152017	0.847064
YGR010W	77.6247	0.118932	0.315101	0.37744	0.705847	0.995016
YGR012W	69.9377	0.290616	0.371142	0.783031	0.433609	0.963011
YGR013W	82.217	0.504448	0.365174	1.38139	0.167159	0.859335
YGR014W	587.365	0.278507	0.313453	0.888514	0.374264	0.963011
YGR015C	29.4558	-0.545661	0.446243	-1.22279	0.221409	0.90141
YBR006W	41.025	-0.2734	0.427539	-0.639474	0.522514	0.98201
YGR016W	5.26854	-0.354142	0.810881	-0.436737	0.662302	0.995016
YGR017W	178.598	0.12228	0.275046	0.444581	0.656623	0.995016
YGR018C	0.663337	0.309028	2.1191	0.14583	0.884056	0.995016
YGR019W	125.042	-0.119142	0.433297	-0.274966	0.783342	0.995016
YGR020C	591.271	0.000931175	0.263465	0.00353434	0.99718	0.999774
YGR021W	71.2621	0.399613	0.351994	1.13528	0.256257	0.924416
YGR023W	30.954	0.528386	0.489833	1.07871	0.280719	0.938169
YGR024C	92.6591	-0.0359249	0.3865	-0.0929492	0.925944	0.997602
YGR026W	234.108	-0.350052	0.399072	-0.877164	0.380398	0.963011
YBR007C	47.7985	0.333288	0.350809	0.950056	0.342084	0.960815
YGR027C	1585.54	-0.645382	0.389817	-1.6556	0.0978021	0.797358
YGR027W-B	855.229	-0.0889325	0.366044	-0.242956	0.80804	0.995016
YGR027W-A	15.2584	0.0611707	0.568141	0.107668	0.914259	0.997602
YGR028W	63.9519	-0.155628	0.365447	-0.425857	0.670212	0.995016
YGR029W	94.2751	0.2424	0.306869	0.789912	0.429579	0.963011
YGR030C	28.8358	0.339666	0.436919	0.777412	0.436916	0.963011
YGR031W	102.326	0.393514	0.400576	0.98237	0.325917	0.960815
YBR008C	17.267	-0.898572	0.505303	-1.77828	0.0753572	0.75924
YGR031C-A	0.263139	0.265372	3.18053	0.0834365	0.933504	0.997602
YGR032W	141.472	0.360786	0.351698	1.02584	0.304967	0.946855
YGR033C	112.115	0.0153089	0.299903	0.051046	0.959289	0.998987
YGR034W	1205.43	-0.173809	0.28222	-0.615862	0.537985	0.984111
YGR035C	86.8536	0.489078	0.356553	1.37168	0.170163	0.860344
YGR036C	35.2131	-0.118822	0.462512	-0.256906	0.797251	0.995016
YGR037C	633.392	-0.269182	0.339489	-0.792903	0.427834	0.963011
YGR038W	39.7395	-0.755175	0.426712	-1.76975	0.0767682	0.75924
YBR009C	661.584	0.286093	0.292763	0.977215	0.328463	0.960815
YGR038C-B	670.744	0.933709	0.278624	3.35114	0.000804791	0.109077
YGR038C-A	231.148	0.794466	0.375482	2.11586	0.0343569	0.569049
YGR040W	81.9552	0.27445	0.33063	0.83008	0.406494	0.963011
YGR041W	47.0884	-0.25241	0.362207	-0.696866	0.485886	0.975031
YGR042W	50.2027	0.534088	0.350163	1.52526	0.127195	0.825015
YGR043C	16.8572	-0.606316	0.546216	-1.11003	0.266986	0.931903
YGR044C	125.197	-0.159949	0.300295	-0.532641	0.594282	0.991182
YGR046W	75.9729	-0.343608	0.336266	-1.02184	0.306859	0.946855
YGR047C	43.0928	0.35622	0.367787	0.968549	0.33277	0.960815
YGR048W	98.6263	-0.0403439	0.29543	-0.13656	0.891379	0.995016
YBR010W	430.413	-0.44918	0.330946	-1.35726	0.174698	0.862521
YGR049W	103.604	-0.0541618	0.357546	-0.151482	0.879596	0.995016
YGR050C	7.94952	0.709009	0.658901	1.07605	0.281906	0.938169
YGR052W	3.91423	-1.26362	1.00654	-1.25541	0.209331	0.887987
YGR053C	12.3583	-0.353199	0.600546	-0.588129	0.556445	0.985673
YGR054W	176.647	-0.0065639	0.283198	-0.0231777	0.981509	0.999774
YGR055W	242.266	-0.0417835	0.529141	-0.0789648	0.937061	0.997602
YGR056W	79.4984	-0.0453857	0.312012	-0.145462	0.884346	0.995016
YGR057C	25.587	-0.00202663	0.437419	-0.00463316	0.996303	0.999774
YGR058W	45.8112	0.39331	0.372666	1.05539	0.291245	0.943818
YGR059W	2.76293	1.32693	1.12793	1.17643	0.239421	0.912042
YBR011C	1951.62	0.217569	0.249471	0.872125	0.38314	0.963011
YGR060W	602.788	-0.101103	0.374828	-0.269732	0.787366	0.995016
YGR061C	183.583	0.00516204	0.304511	0.0169519	0.986475	0.999774
YGR062C	39.3134	-0.271024	0.433672	-0.624951	0.532003	0.982052
YGR063C	60.5796	0.537871	0.419087	1.28344	0.199339	0.88439
YGR065C	48.9162	-0.291933	0.359139	-0.812871	0.416292	0.963011
YGR066C	4.1264	0.778722	0.882996	0.881909	0.377826	0.963011
YGR067C	15.6582	0.20563	0.549112	0.374478	0.708049	0.995016
YGR068C	31.0903	0.650466	0.497731	1.30686	0.191259	0.874929
YGR070W	47.4128	-1.24538	0.396674	-3.13956	0.001692	0.149559
YBR012W-B	338.226	0.626062	0.313363	1.99788	0.0457297	0.64845
YGR071C	61.005	-0.209119	0.337753	-0.619149	0.535818	0.982956
YGR072W	39.4101	0.799449	0.417131	1.91654	0.0552963	0.696041
YGR074W	87.6215	0.0599049	0.303183	0.197586	0.843369	0.995016
YGR075C	10.9866	-0.105077	0.594515	-0.176744	0.85971	0.995016
YGR076C	68.0343	-0.148948	0.318321	-0.467918	0.639843	0.993441
YGR077C	95.961	-0.140438	0.320934	-0.437592	0.661682	0.995016
YGR078C	88.7036	0.740852	0.397339	1.86453	0.0622468	0.722327
YGR079W	102.756	0.357405	0.473955	0.75409	0.450795	0.966149
YGR080W	132.517	-0.130865	0.297051	-0.440548	0.659541	0.995016
YGR081C	67.7722	0.83117	0.346674	2.39755	0.0165049	0.433158
YBR012W-A	27.0762	-0.503768	0.458537	-1.09864	0.271925	0.931903
YGR082W	260.731	-0.182929	0.279074	-0.655486	0.512155	0.979757
YGR083C	183.895	0.0511648	0.337761	0.151482	0.879595	0.995016
YGR084C	102.155	-0.0868286	0.293982	-0.295353	0.767724	0.995016
YGR085C	2605.7	-0.0362096	0.313628	-0.115454	0.908085	0.9976
YGR086C	1835.56	-0.209055	0.253664	-0.824141	0.40986	0.963011
YGR087C	0.86297	1.09703	1.898	0.577991	0.56327	0.98729
YGR088W	34.5659	-1.30272	0.444329	-2.93187	0.00336924	0.204541
YGR089W	86.5542	-0.449604	0.303572	-1.48105	0.138594	0.826612
YGR090W	99.0667	-0.635821	0.323937	-1.96279	0.0496703	0.674775
YAL044W-A	95.2311	-0.0988733	0.320735	-0.308271	0.757876	0.995016
YBR013C	11.2185	-0.723806	0.611324	-1.184	0.236415	0.910657
YGR091W	33.3779	0.178794	0.392999	0.454949	0.649146	0.995016
YGR092W	67.4213	-0.347504	0.355963	-0.976236	0.328948	0.960815
YGR093W	42.3535	-0.0581628	0.379266	-0.153356	0.878117	0.995016
YGR094W	497.285	-0.236713	0.313155	-0.755898	0.44971	0.966149
YGR095C	66.068	-0.0540212	0.343833	-0.157115	0.875154	0.995016
YGR096W	14.5136	-0.65975	0.521406	-1.26533	0.205754	0.887987
YGR097W	88.297	0.140073	0.3384	0.413928	0.678927	0.995016
YGR098C	51.9954	-0.238527	0.360341	-0.661948	0.508005	0.979518
YGR099W	63.7588	-0.182218	0.320671	-0.568239	0.569873	0.990379
YGR100W	92.0257	-0.221391	0.3168	-0.698837	0.484654	0.974707
YGR101W	45.1543	-0.193454	0.365327	-0.529538	0.596432	0.991182
YGR102C	82.2008	-0.14617	0.341364	-0.428195	0.668509	0.995016
YGR103W	436.534	0.409156	0.427201	0.957758	0.338185	0.960815
YGR104C	40.2277	0.571008	0.376653	1.51601	0.129518	0.825015
YGR105W	156.856	0.264932	0.321166	0.824908	0.409424	0.963011
YGR106C	339.365	-0.112369	0.353125	-0.318214	0.750322	0.995016
YGR108W	104.712	-0.294742	0.407075	-0.724049	0.469036	0.968894
YGR109C	21.6161	-0.811066	0.549736	-1.47537	0.140112	0.826612
YBR014C	73.5591	0.0299441	0.333789	0.0897097	0.928518	0.997602
YGR109W-B	116.354	-0.308753	0.361437	-0.854238	0.392973	0.963011
YGR109W-A	0.701726	-1.56349	2.15059	-0.727003	0.467224	0.967655
YGR110W	15.2501	-0.57316	0.544279	-1.05306	0.292312	0.943818
YGR111W	94.5148	-0.399252	0.360057	-1.10886	0.267492	0.931903
YGR112W	55.3959	-0.0714465	0.367025	-0.194664	0.845656	0.995016
YGR113W	66.9624	0.451642	0.342962	1.31689	0.187876	0.86981
YGR116W	246.008	-0.141261	0.289682	-0.487641	0.625804	0.991182
YGR117C	65.6024	-0.377849	0.361067	-1.04648	0.29534	0.946777
YGR118W	886.57	-0.129729	0.267969	-0.48412	0.628301	0.991182
YBR015C	235.064	-0.0187907	0.284057	-0.0661513	0.947257	0.997602
YGR119C	155.766	0.46345	0.331726	1.39709	0.162387	0.852859
YGR120C	30.5618	-0.630249	0.415911	-1.51535	0.129684	0.825015
YGR121C	17.4061	-0.069875	0.497111	-0.140562	0.888216	0.995016
YGR122W	43.0363	-0.616535	0.407581	-1.51267	0.130364	0.825015
YGR123C	79.6457	-0.0212755	0.327888	-0.0648866	0.948264	0.997602
YGR124W	684.87	-0.190564	0.315235	-0.604513	0.545502	0.985673
YBR016W	415.949	0.71443	0.421888	1.69341	0.0903772	0.791567
YGR125W	59.9167	-0.238546	0.346777	-0.687895	0.491519	0.976359
YGR126W	5.74244	0.264733	0.765676	0.345751	0.72953	0.995016
YGR127W	29.3072	-0.536685	0.499369	-1.07473	0.282497	0.938169
YGR128C	95.6866	-0.192299	0.322079	-0.597057	0.550469	0.985673
YGR129W	44.3833	0.857767	0.380461	2.25455	0.0241617	0.506527
YGR130C	183.268	-0.115624	0.315221	-0.366804	0.713765	0.995016
YGR131W	6.95283	-0.196122	0.749923	-0.261523	0.793689	0.995016
YGR132C	335.14	0.0153597	0.288918	0.0531629	0.957602	0.998909
YGR133W	40.5159	0.206544	0.41453	0.49826	0.618301	0.991182
YGR134W	38.8796	-0.311433	0.36444	-0.854553	0.392799	0.963011
YBR017C	114.671	-0.0590344	0.304652	-0.193777	0.846351	0.995016
YGR135W	370.268	-0.2454	0.269442	-0.910769	0.362417	0.963011
YGR136W	204.24	0.154476	0.299051	0.516553	0.605468	0.991182
YGR138C	20.6869	-0.724927	0.449299	-1.61346	0.106644	0.803521
YGR140W	70.3668	0.326465	0.37924	0.860842	0.389325	0.963011
YGR141W	38.9981	0.239659	0.360897	0.664065	0.506649	0.979518
YGR142W	21.511	0.250955	0.474189	0.52923	0.596646	0.991182
YGR143W	91.8948	-0.521885	0.325206	-1.60478	0.108541	0.803521
YGR144W	1.78277	1.7108	1.45475	1.17601	0.239591	0.912042
YBR018C	5424.84	-0.581895	0.344541	-1.6889	0.0912385	0.791567
YGR145W	143.794	0.546755	0.406316	1.34564	0.178419	0.866193
YGR146C	28.6358	-0.137233	0.467308	-0.293667	0.769013	0.995016
YGR146C-A	1.25187	1.59769	1.64801	0.969464	0.332314	0.960815
YGR147C	144.912	0.551177	0.306793	1.79657	0.0724034	0.756214
YGR148C	1170.4	0.0475092	0.248304	0.191335	0.848263	0.995016
YGR149W	34.2672	0.071406	0.514039	0.138912	0.88952	0.995016
YGR150C	63.3646	-0.46998	0.348664	-1.34794	0.177676	0.865801
YGR152C	85.3891	1.02916	0.320164	3.21448	0.00130679	0.143698
YGR153W	12.412	2.65625	0.659745	4.02618	5.66898e-05	0.0165194
YBR019C	8148.09	-0.397331	0.317201	-1.25261	0.210346	0.887987
YGR154C	21.8032	0.420205	0.469266	0.895451	0.370546	0.963011
YGR155W	606.851	-0.714811	0.379825	-1.88195	0.0598426	0.710097
YGR156W	31.6751	0.439814	0.402819	1.09184	0.274904	0.937188
YGR157W	175.868	-0.0926406	0.331105	-0.279793	0.779637	0.995016
YGR158C	81.3554	0.392543	0.338478	1.15973	0.246159	0.91781
YGR159C	596.647	-0.0379565	0.338459	-0.112145	0.910708	0.997602
YGR161C	114.145	0.659531	0.381697	1.72789	0.0840074	0.778659
YGR161W-C	58.9291	0.591804	0.332756	1.7785	0.0753226	0.75924
YGR161W-B	64.424	-0.0912516	0.359387	-0.253909	0.799566	0.995016
YGR161W-A	28.9108	-0.08777	0.439932	-0.199508	0.841865	0.995016
YBR020W	8418.33	-0.472794	0.310393	-1.52321	0.127706	0.825015
YGR161C-D	497.15	0.858795	0.285264	3.01053	0.00260792	0.189111
YGR161C-C	0.151608	-0.696415	4.08047	-0.17067	0.864483	0.995016
YGR162W	407.139	-0.0977951	0.364952	-0.267967	0.788725	0.995016
YGR163W	82.8385	0.133506	0.375793	0.355266	0.722391	0.995016
YGR165W	138.858	-0.427921	0.304292	-1.40628	0.15964	0.852859
YGR166W	47.6603	-0.444355	0.387491	-1.14675	0.251485	0.920061
YGR167W	678.86	0.108957	0.27217	0.400328	0.688915	0.995016
YGR168C	21.2165	-0.432718	0.481855	-0.898024	0.369173	0.963011
YBR021W	101.321	-0.420445	0.299004	-1.40615	0.159678	0.852859
YGR169C	57.8528	0.272944	0.356852	0.764867	0.444351	0.963763
YGR169C-A	178.272	0.142891	0.362891	0.393758	0.69376	0.995016
YGR170W	81.6476	-0.14419	0.318836	-0.452237	0.651098	0.995016
YGR171C	43.0001	-0.408161	0.35409	-1.1527	0.249033	0.918077
YGR172C	45.9997	-0.0996568	0.402539	-0.247571	0.804467	0.995016
YGR173W	75.6325	0.286646	0.360648	0.79481	0.426724	0.963011
YGR174C	164.815	0.0916148	0.337662	0.271321	0.786144	0.995016
YGR174W-A	8.17267	-0.613006	0.852457	-0.719105	0.472077	0.969095
YGR175C	554.978	0.184661	0.279069	0.661706	0.50816	0.979518
YAL044C	206.123	0.402183	0.285233	1.41002	0.158535	0.851291
YBR022W	30.4658	-0.131936	0.435249	-0.303128	0.761793	0.995016
YGR177C	19.817	-0.567774	0.483717	-1.17377	0.240486	0.913465
YGR178C	166.163	0.0396006	0.293965	0.134712	0.89284	0.995016
YGR179C	67.486	0.182257	0.316512	0.575829	0.564731	0.988361
YGR180C	1695.62	0.188878	0.328153	0.57558	0.564899	0.988361
YGR181W	113.317	0.0136159	0.293692	0.0463613	0.963022	0.999774
YGR183C	162.41	-0.763664	0.379736	-2.01104	0.0443213	0.640954
YGR184C	130.222	-0.0966289	0.297339	-0.324979	0.745197	0.995016
YGR185C	571.346	0.0333323	0.257514	0.129439	0.89701	0.995296
YGR186W	168.798	0.360287	0.316241	1.13928	0.254586	0.921386
YBR023C	81.8048	-0.00313083	0.331091	-0.00945608	0.992455	0.999774
YGR187C	95.0651	0.547406	0.372679	1.46884	0.141876	0.82934
YGR188C	32.2202	0.543034	0.383436	1.41623	0.156707	0.848784
YGR189C	373.261	0.359502	0.370315	0.9708	0.331648	0.960815
YGR191W	99.5661	-0.35481	0.301385	-1.17726	0.23909	0.912042
YGR192C	16573.1	-0.245128	0.285972	-0.857175	0.391348	0.963011
YGR193C	180.204	-0.0683605	0.29524	-0.231542	0.816894	0.995016
YGR194C	80.2456	-0.768842	0.397303	-1.93515	0.0529717	0.687571
YGR195W	57.556	-0.00702296	0.336177	-0.0208907	0.983333	0.999774
YBR024W	71.8382	-0.163945	0.337807	-0.485321	0.627449	0.991182
YGR196C	97.9716	0.646212	0.310476	2.08136	0.0374009	0.588574
YGR197C	29.67	0.302299	0.399463	0.756763	0.449192	0.966149
YGR198W	92.6609	-0.507134	0.343954	-1.47442	0.140367	0.826612
YGR199W	81.8083	-0.235266	0.308361	-0.762958	0.445489	0.963763
YGR200C	138.341	0.0624728	0.335151	0.186402	0.85213	0.995016
YGR201C	28.7263	0.748055	0.458449	1.63171	0.102741	0.797358
YGR202C	160.793	-0.0746312	0.276019	-0.270384	0.786865	0.995016
YGR203W	53.4398	0.282003	0.376082	0.749843	0.453349	0.966149
YGR204W	441.695	0.229121	0.272147	0.841901	0.399843	0.963011
YGR204C-A	0.151608	-0.696415	4.08047	-0.17067	0.864483	0.995016
YBR025C	784.576	-0.276662	0.269437	-1.02681	0.304508	0.946855
YGR205W	56.4594	-0.565326	0.366381	-1.543	0.122831	0.81931
YGR206W	44.398	0.0632934	0.432915	0.146203	0.883761	0.995016
YGR207C	158.078	0.0927	0.33501	0.276708	0.782004	0.995016
YGR208W	82.658	0.257562	0.312038	0.82542	0.409133	0.963011
YGR209C	390.19	-0.477411	0.330275	-1.44549	0.148319	0.844743
YGR210C	170.1	0.373317	0.342896	1.08872	0.276278	0.938169
YGR211W	190.343	-0.0101237	0.313213	-0.0323221	0.974215	0.999774
YGR212W	13.2922	-0.106762	0.536084	-0.199152	0.842144	0.995016
YGR213C	0.827829	3.32963	2	1.66482	0.0959496	0.797358
YGR214W	2100.75	0.061356	0.282476	0.217208	0.828047	0.995016
YBR026C	162.767	-0.0522327	0.399148	-0.130861	0.895886	0.995296
YGR215W	88.035	0.108189	0.37793	0.286268	0.774673	0.995016
YGR216C	33.7875	-0.463948	0.388752	-1.19343	0.232702	0.910657
YGR217W	47.2586	-0.0225789	0.357009	-0.0632448	0.949572	0.997602
YGR218W	160.403	-0.296085	0.364553	-0.812186	0.416685	0.963011
YGR220C	79.5463	-0.0915714	0.34893	-0.262435	0.792986	0.995016
YGR221C	89.5312	-0.130736	0.307728	-0.424842	0.670952	0.995016
YGR222W	67.4495	-0.234985	0.358294	-0.655845	0.511924	0.979757
YBR028C	103.359	-0.0838065	0.29213	-0.286881	0.774203	0.995016
YGR223C	67.5433	-0.132263	0.340369	-0.388587	0.697581	0.995016
YGR224W	0.531214	1.16167	2.39263	0.485521	0.627307	0.991182
YGR225W	3.01379	-3.89502	1.47383	-2.64279	0.00822249	0.337372
YGR227W	59.2614	-0.28785	0.357537	-0.80509	0.420768	0.963011
YGR229C	313.052	0.261716	0.294757	0.887906	0.374592	0.963011
YGR230W	48.2664	-0.155788	0.374904	-0.415543	0.677745	0.995016
YGR231C	305.889	0.131949	0.263589	0.500586	0.616663	0.991182
YGR232W	87.2743	-0.328961	0.412663	-0.797167	0.425354	0.963011
YGR233C	111.722	-0.300462	0.323846	-0.927793	0.353515	0.960971
YGR234W	680.707	-1.60147	0.374668	-4.27438	1.91672e-05	0.00698167
YBR029C	198.296	0.0596408	0.31016	0.192291	0.847514	0.995016
YGR235C	149.57	0.017742	0.276341	0.0642032	0.948808	0.997602
YGR236C	2.18186	-0.74817	1.21304	-0.616772	0.537385	0.983322
YGR237C	113.285	0.249826	0.282493	0.884361	0.376501	0.963011
YGR238C	38.589	-0.208025	0.381676	-0.545031	0.585732	0.991182
YGR239C	84.5753	0.179101	0.363425	0.492814	0.622144	0.991182
YGR240C	492.416	-0.286589	0.299016	-0.958438	0.337842	0.960815
YGR240C-A	1.35333	0.929252	1.62329	0.572448	0.567018	0.9888
YGR241C	144.243	0.16255	0.330145	0.492359	0.622466	0.991182
YGR243W	71.1611	-0.203991	0.333103	-0.612396	0.540276	0.985517
YGR244C	547.871	0.0758732	0.272818	0.27811	0.780928	0.995016
YBR030W	53.61	0.177763	0.354495	0.501453	0.616052	0.991182
YGR245C	271.657	0.84381	0.463782	1.81941	0.0688486	0.75016
YGR246C	83.9911	0.428128	0.345761	1.23822	0.215635	0.893827
YGR247W	47.4015	0.0626868	0.358813	0.174706	0.86131	0.995016
YGR248W	50.8188	-1.35409	1.14031	-1.18747	0.235041	0.910657
YGR249W	4.29735	-0.00395114	0.89382	-0.00442051	0.996473	0.999774
YGR250C	98.8938	-0.673313	0.403166	-1.67006	0.0949067	0.797358
YGR251W	72.8371	0.877242	0.412182	2.12829	0.033313	0.56234
YGR252W	108.009	0.0493589	0.307554	0.160488	0.872496	0.995016
YGR253C	393.29	0.029732	0.261248	0.113807	0.909391	0.9976
YGR254W	2053.11	-0.731608	0.496291	-1.47415	0.140441	0.826612
YBR031W	2443.55	-0.216153	0.279433	-0.773538	0.439204	0.963011
YGR255C	224.973	-0.170962	0.315739	-0.541467	0.588186	0.991182
YGR256W	9.37699	-0.449095	0.709448	-0.633021	0.52672	0.982052
YGR257C	103.115	0.12751	0.300408	0.424456	0.671233	0.995016
YGR258C	46.2389	0.655343	0.371517	1.76397	0.0777378	0.75924
YGR260W	226.639	-0.480021	0.286858	-1.67338	0.0942531	0.797358
YGR261C	113.642	-0.353512	0.297603	-1.18786	0.234887	0.910657
YGR262C	154.805	0.200116	0.312108	0.641176	0.521408	0.981197
YGR263C	24.8405	-0.0552917	0.447149	-0.123654	0.901589	0.996631
YGR264C	306.322	-0.278266	0.288761	-0.963657	0.335218	0.960815
YBR033W	40.5645	-0.635837	0.375504	-1.69329	0.0904004	0.791567
YGR266W	77.8879	0.0774558	0.351737	0.22021	0.825708	0.995016
YGR267C	178.275	0.0882831	0.271069	0.325685	0.744662	0.995016
YGR268C	61.1008	0.0806758	0.35827	0.225181	0.821838	0.995016
YGR270W	150.121	0.140286	0.319609	0.43893	0.660713	0.995016
YGR271W	44.8727	-0.485352	0.352151	-1.37825	0.168126	0.859718
YGR271C-A	54.1092	0.775114	0.347223	2.23233	0.0255934	0.520698
YGR274C	85.7329	0.304402	0.327959	0.92817	0.353319	0.960971
YGR275W	131.483	0.787041	0.405494	1.94094	0.052265	0.684575
YGR276C	93.2327	0.342803	0.305485	1.12216	0.261794	0.929796
YAL043C	146.039	-0.0477878	0.335897	-0.142269	0.886867	0.995016
YBR034C	205.145	0.10258	0.279058	0.367595	0.713175	0.995016
YGR277C	70.7066	0.167312	0.344758	0.485304	0.627461	0.991182
YGR278W	42.1464	-0.190999	0.382978	-0.49872	0.617977	0.991182
YGR279C	957.447	-0.0713663	0.306175	-0.23309	0.815691	0.995016
YGR280C	226.611	1.05716	0.42983	2.45948	0.0139137	0.425494
YGR281W	115.99	0.0777389	0.312112	0.249074	0.803304	0.995016
YGR282C	1539.08	0.191356	0.274932	0.696012	0.486421	0.975185
YGR283C	27.7521	0.306532	0.428402	0.715524	0.474285	0.970985
YGR284C	137.065	-0.332736	0.403604	-0.824412	0.409705	0.963011
YGR285C	1079.45	0.446425	0.365494	1.22143	0.221924	0.90141
YGR286C	80.1835	0.166676	0.365534	0.45598	0.648404	0.995016
YBR035C	217.503	-0.0258686	0.297411	-0.0869794	0.930688	0.997602
YGR287C	12.3239	0.189689	0.547523	0.34645	0.729005	0.995016
YGR288W	15.9884	-0.0114913	0.49696	-0.0231232	0.981552	0.999774
YGR289C	32.5416	-0.027599	0.430163	-0.0641593	0.948843	0.997602
YGR292W	101.57	-0.640413	0.475777	-1.34604	0.178291	0.866193
YGR294W	3.15924	0.96981	1.11015	0.873582	0.382346	0.963011
YGR295C	115.198	-0.414304	0.35699	-1.16055	0.245825	0.91781
YGR296W	40.8174	1.07342	0.459498	2.33607	0.0194876	0.45959
YHL050C	131.182	1.51469	0.528595	2.86549	0.00416359	0.226779
YHL049C	6.20305	0.879603	0.839084	1.04829	0.294505	0.946424
YHL048C-A	0.567391	1.40967	2.46106	0.572787	0.566789	0.9887
YHL048W	101.007	0.268378	0.332639	0.806817	0.419772	0.963011
YHL047C	106.028	1.64232	0.530256	3.09722	0.00195347	0.157152
YHL046C	1.09248	0.557387	1.63167	0.341606	0.732647	0.995016
YHL044W	21.5186	-0.456805	0.596034	-0.766407	0.443434	0.963763
YHL043W	0.132123	-0.696415	4.08047	-0.17067	0.864483	0.995016
YHL042W	1.50809	1.00054	1.56326	0.640031	0.522152	0.981765
YHL040C	51.2396	0.904832	0.507103	1.78432	0.0743723	0.75924
YHL039W	56.6687	-0.0809663	0.345616	-0.234266	0.814778	0.995016
YHL038C	65.6589	0.032945	0.335543	0.0981843	0.921786	0.997602
YHL036W	19.9374	0.0433367	0.720323	0.0601628	0.952026	0.998211
YHL035C	74.2301	0.0240733	0.360495	0.0667784	0.946758	0.997602
YHL034C	945.951	0.344643	0.299084	1.15233	0.249185	0.918077
YHL033C	1442.05	0.135019	0.340885	0.396085	0.692042	0.995016
YHL032C	136.24	-0.097828	0.320166	-0.305554	0.759945	0.995016
YHL031C	216.835	-0.13204	0.304983	-0.432941	0.665057	0.995016
YHL030W	49.7417	-0.657811	0.435382	-1.51088	0.130818	0.825015
YHL029C	92.3786	-0.0417718	0.373946	-0.111705	0.911057	0.997602
YHL028W	70.1571	-1.44062	0.528609	-2.72531	0.0064241	0.308701
YHL027W	123.255	-0.0669095	0.286488	-0.233551	0.815334	0.995016
YHL026C	15.4213	-0.080739	0.549807	-0.14685	0.883251	0.995016
YBR036C	192.457	-0.00405558	0.276721	-0.0146558	0.988307	0.999774
YHL025W	163.342	0.949277	0.38259	2.48119	0.0130945	0.418392
YHL024W	3.42051	-1.32036	1.03833	-1.27161	0.20351	0.885602
YHL023C	54.6097	0.0385183	0.393258	0.0979468	0.921975	0.997602
YHL022C	3.11127	0.307164	1.00548	0.305489	0.759994	0.995016
YHL021C	217.557	-1.16221	0.50412	-2.30542	0.0211428	0.474746
YHL020C	150.236	1.21078	0.436671	2.77275	0.00555851	0.279267
YHL019C	72.4285	0.392205	0.355149	1.10434	0.269446	0.931903
YHL018W	6.65217	-0.822179	0.746429	-1.10148	0.270687	0.931903
YHL017W	93.0193	-0.297067	0.334754	-0.887418	0.374854	0.963011
YBR037C	104.451	-0.136613	0.310501	-0.439976	0.659955	0.995016
YHL016C	15.105	0.175101	0.523872	0.334243	0.738196	0.995016
YHL015W	2230.79	-0.306901	0.242381	-1.26619	0.205445	0.887987
YHL014C	31.8802	0.0573436	0.388414	0.147635	0.882631	0.995016
YHL013C	60.1621	0.840759	0.35601	2.36161	0.0181956	0.450398
YHL012W	1.74176	0.86071	1.37627	0.625395	0.531712	0.982052
YHL011C	224.174	0.0826825	0.269539	0.306755	0.75903	0.995016
YHL010C	41.8635	0.127207	0.367392	0.346244	0.729159	0.995016
YHL009C	59.4933	-0.0269307	0.337345	-0.0798312	0.936372	0.997602
YBR038W	71.7972	0.0331849	0.331498	0.100106	0.92026	0.997602
YHL009W-B	32.9872	-0.167111	0.392927	-0.425297	0.67062	0.995016
YHL009W-A	2.39332	-0.778204	1.18184	-0.658469	0.510237	0.979757
YHL008C	73.3929	-0.242347	0.343946	-0.704607	0.481055	0.973201
YHL007C	132.516	0.0773077	0.360056	0.21471	0.829993	0.995016
YHL006C	13.129	0.942971	0.552688	1.70615	0.0879794	0.789328
YHL004W	193.002	-0.249479	0.289566	-0.861564	0.388927	0.963011
YHL003C	120.286	-0.476185	0.330929	-1.43893	0.15017	0.845727
YHL002W	105.95	-0.0205369	0.302811	-0.0678209	0.945928	0.997602
YHL001W	428.975	-0.175744	0.31394	-0.559802	0.575615	0.991182
YHR001W	144.777	-0.0391402	0.272923	-0.143411	0.885965	0.995016
YBR039W	868.211	-0.743343	0.342179	-2.17238	0.0298269	0.541577
YHR001W-A	171.202	-0.72374	0.348759	-2.07519	0.0379693	0.589081
YHR002W	28.7548	-0.0072751	0.472725	-0.0153897	0.987721	0.999774
YHR003C	63.4661	-0.0673546	0.336983	-0.199876	0.841578	0.995016
YHR004C	77.4365	-0.235417	0.376042	-0.626039	0.531289	0.982052
YHR005C	126.374	-0.367833	0.300322	-1.2248	0.220652	0.901163
YHR005C-A	470.442	0.0489338	0.360469	0.13575	0.892019	0.995016
YHR006W	90.0713	0.461863	0.349504	1.32148	0.186341	0.869375
YHR007C	747.681	-0.173904	0.314097	-0.553664	0.579809	0.991182
YHR007C-A	4.23502	-0.629362	0.943165	-0.667287	0.504589	0.979518
YBR040W	0.477557	-2.23009	2.53884	-0.878388	0.379733	0.963011
YHR008C	549.062	-0.620801	0.273002	-2.27398	0.0229671	0.486736
YHR009C	189.638	-0.381331	0.292094	-1.30551	0.19172	0.874975
YHR010W	1250.68	0.0826283	0.270823	0.305101	0.76029	0.995016
YHR011W	27.278	0.12297	0.415933	0.295648	0.767499	0.995016
YHR012W	87.2782	0.0904845	0.386955	0.233837	0.815112	0.995016
YHR013C	142.811	0.0780818	0.305716	0.255406	0.798409	0.995016
YHR014W	0.586388	1.31149	2.33296	0.562155	0.57401	0.990916
YHR015W	2.1836	0.088269	1.24951	0.0706431	0.943682	0.997602
YBR041W	92.7517	-0.349146	0.31339	-1.11409	0.265239	0.929796
YHR016C	108.879	-0.148136	0.315962	-0.46884	0.639184	0.993112
YHR017W	52.1754	-0.101058	0.362824	-0.278532	0.780604	0.995016
YHR018C	204.733	-0.164942	0.342285	-0.481884	0.629889	0.991182
YHR019C	1075.55	-0.272561	0.246791	-1.10442	0.269411	0.931903
YHR020W	221.029	-0.0984207	0.314029	-0.313413	0.753967	0.995016
YHR021C	346.657	-0.409185	0.284772	-1.43689	0.15075	0.845727
YHR021W-A	2.60168	0.445996	1.08389	0.411478	0.680722	0.995016
YHR022C	3.92172	-0.695148	1.03949	-0.668741	0.503661	0.979518
YHR022C-A	0.174342	-0.696415	4.03603	-0.17255	0.863006	0.995016
YAL042W	642.984	0.439525	0.365153	1.20367	0.228716	0.902477
YBR042C	61.0261	0.00665742	0.390689	0.0170402	0.986405	0.999774
YHR023W	75.9908	0.39949	0.31861	1.25385	0.209895	0.887987
YHR024C	138.481	-0.0396305	0.280832	-0.141118	0.887777	0.995016
YHR025W	310.696	0.051549	0.296635	0.173779	0.862039	0.995016
YHR026W	116.75	-0.562601	0.387764	-1.45089	0.146812	0.844466
YHR027C	415.263	-0.174805	0.328857	-0.531554	0.595035	0.991182
YHR028C	142.914	-0.1663	0.32743	-0.507896	0.611526	0.991182
YHR029C	28.0115	0.350967	0.426759	0.822402	0.410848	0.963011
YHR030C	85.8042	0.55284	0.344813	1.60331	0.108867	0.803521
YHR031C	61.8148	-0.295328	0.353866	-0.834576	0.403956	0.963011
YHR032W	134.413	0.222431	0.368591	0.603464	0.5462	0.985673
YBR043C	84.1013	0.137135	0.320846	0.427418	0.669075	0.995016
YHR033W	357.004	-0.702696	0.39585	-1.77515	0.0758724	0.75924
YHR034C	41.4054	0.604129	0.398176	1.51724	0.129206	0.825015
YHR035W	18.4593	-0.38772	0.537804	-0.720931	0.470952	0.968894
YHR036W	72.4601	0.346087	0.360256	0.960669	0.336719	0.960815
YHR037W	370.635	-0.121967	0.273623	-0.445746	0.655781	0.995016
YHR038W	16.4112	0.320461	0.575232	0.557098	0.57746	0.991182
YHR039C	161.526	-0.252144	0.314216	-0.802456	0.422289	0.963011
YHR039C-A	437.49	0.176338	0.265684	0.663714	0.506874	0.979518
YHR040W	82.7442	1.03167	0.495307	2.0829	0.0372604	0.588574
YHR041C	47.065	0.319643	0.37123	0.861037	0.389218	0.963011
YBR044C	57.4889	0.00212113	0.335953	0.00631377	0.994962	0.999774
YHR042W	475.801	0.227285	0.32493	0.699487	0.484248	0.974707
YHR043C	246.57	-0.00445346	0.347074	-0.0128314	0.989762	0.999774
YHR044C	94.1986	0.655017	0.343775	1.90536	0.0567328	0.700933
YHR045W	61.8393	0.0564587	0.342705	0.164745	0.869145	0.995016
YHR046C	28.9177	0.926375	0.436617	2.12171	0.0338623	0.565827
YHR047C	196.602	-0.0760674	0.331956	-0.229149	0.818753	0.995016
YHR048W	5.96447	-0.04735	0.811861	-0.0583228	0.953492	0.998211
YHR049W	115.955	-0.827926	0.337504	-2.45309	0.0141637	0.425494
YHR050W	124.625	-0.124344	0.288747	-0.430633	0.666736	0.995016
YHR050W-A	255.891	-1.02503	0.440051	-2.32935	0.0198406	0.460371
YHR051W	301.664	-1.20364	0.388924	-3.09481	0.00196941	0.157152
YHR052W	139.233	0.0283786	0.293145	0.0968075	0.922879	0.997602
YHR053C	10356.6	-0.515255	2.0615	-0.249942	0.802632	0.995016
YHR054C	42.3952	-0.143601	0.458894	-0.312929	0.754335	0.995016
YHR055C	10363.9	-0.514278	2.0617	-0.249444	0.803018	0.995016
YHR056C	99.0518	-0.301119	0.336189	-0.895683	0.370422	0.963011
YHR057C	129.567	0.73026	0.340949	2.14184	0.0322063	0.55428
YHR058C	40.8447	0.646738	0.403751	1.60182	0.109195	0.803521
YBR045C	11.475	0.720787	0.604406	1.19255	0.233044	0.910657
YHR059W	84.1253	-0.275193	0.324122	-0.849041	0.395858	0.963011
YHR060W	110.389	0.386805	0.336373	1.14993	0.250173	0.918077
YHR061C	42.1616	-0.0747293	0.392186	-0.190546	0.848882	0.995016
YHR062C	58.9789	0.35789	0.43391	0.824803	0.409483	0.963011
YHR063C	119.573	-0.0890256	0.296436	-0.30032	0.763933	0.995016
YHR064C	631.926	-0.0894259	0.286921	-0.311674	0.755288	0.995016
YHR065C	112.849	0.248077	0.316087	0.784839	0.432548	0.963011
YHR066W	82.473	0.340374	0.421031	0.808428	0.418844	0.963011
YHR067W	49.4449	0.576672	0.352665	1.63518	0.102011	0.797358
YHR068W	410.109	0.0778902	0.255949	0.30432	0.760884	0.995016
YBR046C	101.444	-0.0789595	0.291704	-0.270684	0.786634	0.995016
YHR069C	77.5233	0.364295	0.36257	1.00476	0.315013	0.9552
YHR070W	65.1986	0.605081	0.383894	1.57617	0.114988	0.816459
YHR071W	66.5964	-0.424899	0.403231	-1.05373	0.292004	0.943818
YHR072W	96.3424	0.0731592	0.324186	0.22567	0.821458	0.995016
YHR072W-A	294.068	0.313015	0.259757	1.20503	0.228193	0.902266
YHR073W	180.955	-0.104521	0.279449	-0.374026	0.708385	0.995016
YHR074W	132.41	-0.324088	0.349224	-0.928023	0.353396	0.960971
YHR075C	35.0941	-0.391926	0.425303	-0.921521	0.356779	0.963011
YHR076W	78.2314	-0.196484	0.336456	-0.583982	0.559232	0.985673
YBR047W	21.7241	0.305163	0.505768	0.603366	0.546265	0.985673
YHR077C	166.884	0.681131	0.39598	1.72012	0.0854114	0.783902
YHR078W	62.8309	-0.223329	0.332548	-0.671569	0.501858	0.979518
YHR079C	78.6519	-0.0381333	0.359821	-0.105979	0.915599	0.997602
YHR079C-A	0.282624	0.265373	3.10636	0.0854288	0.93192	0.997602
YHR080C	100.988	0.111726	0.300844	0.371375	0.710358	0.995016
YHR081W	172.084	0.72729	0.386392	1.88226	0.0598004	0.710097
YHR082C	204.802	-0.0854054	0.279814	-0.305222	0.760197	0.995016
YHR083W	118.215	-0.370531	0.292627	-1.26622	0.205433	0.887987
YHR084W	96.0922	-0.0871141	0.304252	-0.286323	0.774631	0.995016
YHR085W	29.7272	0.91873	0.454215	2.02268	0.0431066	0.629085
YBR048W	2043.2	-0.0846832	0.315812	-0.268145	0.788588	0.995016
YHR086W	56.4717	-0.297755	0.351048	-0.84819	0.396332	0.963011
YHR086W-A	0.132123	-0.696415	4.08047	-0.17067	0.864483	0.995016
YHR087W	123.213	-2.0223	0.906021	-2.23207	0.0256105	0.520698
YHR088W	109.198	0.167554	0.336676	0.49767	0.618716	0.991182
YHR089C	337.397	0.288087	0.335174	0.859514	0.390057	0.963011
YHR090C	55.3165	0.345396	0.368333	0.937726	0.348385	0.960815
YHR091C	61.2744	0.012713	0.329131	0.0386261	0.969188	0.999774
YHR092C	7.11515	1.10017	0.716375	1.53574	0.124602	0.821877
YHR094C	1.62321	0.768148	1.48406	0.517598	0.604739	0.991182
YHR096C	4.5323	0.879186	0.936223	0.939077	0.347691	0.960815
YBR049C	136.305	0.0764614	0.379855	0.201291	0.840471	0.995016
YHR097C	114.3	-0.172194	0.329808	-0.522103	0.601599	0.991182
YHR098C	165.433	-0.21823	0.320007	-0.681956	0.495267	0.977176
YHR099W	143.805	-0.0121683	0.324271	-0.0375251	0.970066	0.999774
YHR100C	34.4538	0.624481	0.418653	1.49164	0.135793	0.826612
YHR101C	32.3663	0.159256	0.438104	0.363511	0.716223	0.995016
YHR102W	77.4426	0.180045	0.339363	0.530538	0.595739	0.991182
YHR103W	74.7776	-0.0716327	0.345786	-0.207159	0.835886	0.995016
YHR104W	155.91	-0.568888	0.418524	-1.35927	0.17406	0.862521
YHR105W	18.3772	0.407894	0.491723	0.829521	0.40681	0.963011
YHR106W	56.025	-0.0946851	0.358593	-0.264046	0.791744	0.995016
YBR050C	88.0135	-0.201591	0.310958	-0.648292	0.516796	0.980324
YHR107C	231.112	0.217785	0.325377	0.669332	0.503284	0.979518
YHR108W	375.788	-0.19953	0.249355	-0.800183	0.423605	0.963011
YHR109W	20.2531	0.0264364	0.505066	0.0523424	0.958256	0.998979
YHR110W	176.343	0.0457472	0.294956	0.155098	0.876744	0.995016
YHR111W	56.0623	0.363868	0.347564	1.04691	0.295141	0.946662
YHR112C	75.5457	0.0745401	0.353059	0.211127	0.832788	0.995016
YHR113W	106.218	-0.568641	0.319562	-1.77944	0.0751682	0.75924
YHR114W	126.877	0.274823	0.321902	0.853747	0.393245	0.963011
YHR115C	100.523	0.0248916	0.315354	0.0789322	0.937087	0.997602
YHR116W	44.3187	0.624483	0.416579	1.49908	0.133854	0.826612
YAL041W	104.294	0.0871898	0.292363	0.298225	0.765532	0.995016
YBR052C	350.829	-0.467574	0.365926	-1.27778	0.201327	0.885103
YHR117W	179.033	-0.15609	0.276089	-0.565362	0.571828	0.990379
YHR118C	40.7407	0.376191	0.383129	0.981892	0.326153	0.960815
YHR119W	94.1867	0.0375408	0.297335	0.126258	0.899528	0.996036
YHR120W	31.8142	-0.0751023	0.38883	-0.193149	0.846842	0.995016
YHR121W	116.98	-0.0264917	0.299464	-0.0884637	0.929508	0.997602
YHR122W	34.9125	0.171114	0.428645	0.399197	0.689748	0.995016
YHR123W	84.4544	-0.0663507	0.315588	-0.210244	0.833477	0.995016
YHR124W	6.25083	-0.0616781	0.758587	-0.0813066	0.935198	0.997602
YHR126C	0.448223	2.4902	2.58083	0.964886	0.334602	0.960815
YBR053C	127.417	-0.389036	0.434237	-0.895908	0.370302	0.963011
YHR127W	57.7825	0.488017	0.372986	1.30841	0.190735	0.873904
YHR128W	103.658	-0.0109065	0.352005	-0.0309839	0.975282	0.999774
YHR129C	45.3087	0.874296	0.36209	2.41458	0.0157533	0.433158
YHR131C	98.4921	1.07076	0.515739	2.07617	0.0378783	0.589081
YHR132C	238.274	-0.0957851	0.267185	-0.358497	0.719971	0.995016
YHR132W-A	109.835	0.128269	0.35261	0.363772	0.716029	0.995016
YHR133C	111.318	-0.141332	0.312046	-0.452921	0.650606	0.995016
YHR134W	29.1718	0.158526	0.427218	0.371066	0.710589	0.995016
YHR135C	367.268	0.0206651	0.307067	0.0672985	0.946344	0.997602
YHR136C	386.111	0.550158	0.26715	2.05937	0.0394593	0.599627
YBR054W	14.1743	-4.63534	1.00862	-4.59573	4.31242e-06	0.0020944
YHR137W	48.7051	-0.765214	0.42242	-1.8115	0.0700635	0.752533
YHR138C	82.3032	0.273793	0.366452	0.747146	0.454976	0.966149
YHR139C	1.75638	-0.87599	1.35124	-0.648288	0.516799	0.980324
YHR140W	5.80569	-0.774552	0.941847	-0.822375	0.410863	0.963011
YHR141C	1413.02	0.142671	0.267203	0.533941	0.593383	0.991182
YHR142W	45.9371	-0.346785	0.405859	-0.854448	0.392857	0.963011
YHR143W	335.478	-0.108987	0.336165	-0.324208	0.745781	0.995016
YHR143W-A	160.283	0.438047	0.296521	1.47729	0.139598	0.826612
YHR144C	42.6387	0.208921	0.400218	0.522018	0.601658	0.991182
YBR055C	74.2129	-0.00671746	0.308149	-0.0217994	0.982608	0.999774
YHR146W	370.444	0.340467	0.295056	1.15391	0.248538	0.918077
YHR147C	103.473	0.02689	0.382707	0.0702627	0.943985	0.997602
YHR148W	38.6636	0.481961	0.400085	1.20465	0.22834	0.902266
YHR149C	137.026	0.269983	0.360059	0.74983	0.453357	0.966149
YHR150W	32.8928	0.118462	0.388311	0.305069	0.760314	0.995016
YHR151C	41.0427	-0.280686	0.368281	-0.762152	0.445969	0.964392
YHR152W	199.812	0.401555	0.352578	1.13891	0.25474	0.921386
YHR153C	8.74191	0.0339309	0.641513	0.052892	0.957818	0.998955
YHR154W	98.3481	0.331209	0.305659	1.08359	0.278548	0.938169
YHR155W	60.5231	-0.391507	0.342347	-1.1436	0.252791	0.921366
YHR156C	14.0719	0.459667	0.54096	0.849725	0.395478	0.963011
YHR157W	3.14682	-0.513602	1.0062	-0.510438	0.609744	0.991182
YHR158C	88.7235	0.322663	0.368226	0.876265	0.380886	0.963011
YHR159W	31.8101	0.176726	0.40681	0.434419	0.663984	0.995016
YHR160C	2.14924	1.80014	1.34573	1.33767	0.181005	0.867127
YHR161C	227.104	0.394112	0.29538	1.33426	0.18212	0.867154
YHR162W	135.767	-0.466054	0.393372	-1.18477	0.236109	0.910657
YHR163W	119.563	0.0965227	0.30715	0.314253	0.753329	0.995016
YBR056W	145.562	-0.250321	0.389081	-0.643363	0.519989	0.980425
YHR164C	34.0689	0.101111	0.413305	0.24464	0.806735	0.995016
YHR165C	104.614	-0.047504	0.340277	-0.139604	0.888973	0.995016
YHR166C	32.2368	0.292257	0.388274	0.752706	0.451626	0.966149
YHR167W	31.8988	0.152942	0.45785	0.334045	0.738345	0.995016
YHR168W	26.752	0.126394	0.414465	0.304957	0.760399	0.995016
YHR169W	68.8506	0.580217	0.447497	1.29658	0.194774	0.878693
YHR170W	389.87	0.0253072	0.34261	0.0738659	0.941117	0.997602
YHR171W	26.9654	0.30654	0.425146	0.721022	0.470896	0.968894
YHR172W	32.362	0.540962	0.422483	1.28043	0.200392	0.884697
YHR174W	5806.74	-0.262186	0.289847	-0.904565	0.365696	0.963011
YHR175W	113.369	0.415376	0.301153	1.37929	0.167806	0.85938
YHR175W-A	24.6127	0.0839496	0.438612	0.191398	0.848214	0.995016
YHR176W	32.0282	0.17705	0.412705	0.428998	0.667925	0.995016
YHR177W	3.30589	0.0151771	0.980724	0.0154754	0.987653	0.999774
YHR178W	31.6342	0.099246	0.414317	0.239541	0.810686	0.995016
YHR179W	796.533	0.38576	0.26635	1.44832	0.147528	0.844466
YHR181W	45.4436	-0.0223866	0.388706	-0.0575926	0.954073	0.998211
YHR182W	45.2435	0.301799	0.361766	0.834238	0.404147	0.963011
YBR056W-A	4.184	1.3264	0.950933	1.39484	0.163064	0.852859
YHR183W	625.148	0.340877	0.264429	1.28911	0.197361	0.883046
YHR184W	1.20951	-0.62491	1.58259	-0.394866	0.692941	0.995016
YHR185C	0.360531	0.265374	2.87523	0.0922967	0.926462	0.997602
YHR186C	55.3369	0.0463767	0.329521	0.14074	0.888076	0.995016
YHR187W	77.5701	-0.158448	0.33221	-0.476952	0.633396	0.991193
YHR188C	321.211	-0.260402	0.272386	-0.956003	0.339071	0.960815
YHR189W	27.9464	0.114097	0.484309	0.235587	0.813753	0.995016
YHR190W	453.184	-0.199042	0.266481	-0.746926	0.455108	0.966149
YHR191C	73.9974	1.01714	0.428454	2.37397	0.017598	0.446067
YBR057C	91.1633	-0.0337979	0.322415	-0.104827	0.916513	0.997602
YHR192W	71.067	-0.0177903	0.309748	-0.0574347	0.954199	0.998211
YHR193C	1135.7	0.361427	0.315487	1.14562	0.251954	0.920588
YHR194W	50.8173	-0.108313	0.336147	-0.322218	0.747288	0.995016
YHR195W	101.869	0.0348417	0.335964	0.103707	0.917402	0.997602
YHR196W	95.2862	0.108512	0.308835	0.35136	0.725318	0.995016
YHR197W	62.8857	0.231619	0.423651	0.546721	0.58457	0.991182
YHR198C	72.2651	-0.836236	0.376266	-2.22246	0.0262524	0.52577
YHR199C	96.7505	0.0184056	0.31265	0.0588698	0.953056	0.998211
YHR199C-A	32.1636	0.298306	0.46008	0.648379	0.51674	0.980324
YHR200W	262.894	0.125385	0.354967	0.353229	0.723917	0.995016
YBR058C	97.9074	-0.0626471	0.318493	-0.196699	0.844063	0.995016
YHR201C	105.048	0.465769	0.333127	1.39818	0.16206	0.852859
YHR202W	31.433	-0.613875	0.496791	-1.23568	0.216577	0.894552
YHR203C	1755.03	-0.185318	0.276138	-0.671107	0.502152	0.979518
YHR204W	94.3187	-0.504883	0.296492	-1.70286	0.0885946	0.790704
YHR205W	160.204	0.269328	0.348526	0.772765	0.439662	0.963011
YHR206W	112.928	0.109526	0.30703	0.356727	0.721296	0.995016
YHR207C	61.9872	0.791222	0.329164	2.40374	0.0162285	0.433158
YHR208W	183.258	-0.115004	0.277339	-0.41467	0.678384	0.995016
YHR209W	15.7562	-0.193864	0.57491	-0.337207	0.735961	0.995016
YHR210C	7.21805	0.7072	0.703763	1.00488	0.314952	0.9552
YAL040C	148.539	-0.272178	0.339133	-0.80257	0.422224	0.963011
YBR058C-A	133.268	0.528189	0.341455	1.54688	0.121893	0.818247
YHR211W	56.0209	0.372183	0.42705	0.87152	0.38347	0.963011
YHR213W	0.132123	-0.696415	4.08047	-0.17067	0.864483	0.995016
YHR214W	30.6437	2.01312	0.501848	4.01142	6.03553e-05	0.01675
YHR214C-B	667.554	0.764989	0.294125	2.6009	0.00929795	0.358059
YHR214C-C	223.367	0.96684	0.305983	3.15978	0.00157887	0.145545
YHR214C-D	0.546721	1.18739	2.52274	0.470673	0.637874	0.992665
YHR214C-E	0.282624	0.265373	3.10636	0.0854288	0.93192	0.997602
YBR059C	189.826	0.193072	0.282155	0.684278	0.4938	0.977176
YHR215W	454.176	0.416755	0.335298	1.24294	0.21389	0.890395
YHR216W	64.5864	-0.618378	0.408764	-1.5128	0.13033	0.825015
YHR218W	18.4549	0.945342	0.570992	1.65561	0.0978	0.797358
YHR219W	78.5027	1.18359	0.499001	2.37191	0.0176964	0.446067
YIL177C	355.186	1.32171	0.478148	2.76423	0.00570579	0.281628
YIL176C	1.4225	2.94741	1.83962	1.60218	0.109116	0.803521
YIL173W	49.7931	0.304859	0.346661	0.879416	0.379176	0.963011
YIL172C	26.2409	0.649774	0.477856	1.35977	0.173903	0.862521
YBR060C	70.334	0.100535	0.338755	0.296779	0.766635	0.995016
YIL170W	0.305358	0.265373	3.02948	0.087597	0.930197	0.997602
YIL169C	3.60787	3.49579	1.36486	2.56128	0.0104288	0.368434
YIL167W	11.2361	0.243815	0.601687	0.405218	0.685317	0.995016
YIL166C	12.6887	0.370322	0.580389	0.638058	0.523436	0.982052
YIL165C	14.5577	0.310549	0.530615	0.585262	0.558372	0.985673
YIL164C	32.6489	0.544082	0.460624	1.18118	0.237529	0.911074
YIL162W	217.032	0.373924	0.401654	0.93096	0.351874	0.960971
YIL161W	39.4421	0.54117	0.39487	1.3705	0.170531	0.860344
YBR061C	55.1708	0.0862471	0.343305	0.251226	0.801639	0.995016
YIL160C	3.42143	1.84971	1.16449	1.58844	0.112188	0.811766
YIL159W	36.3169	0.505189	0.380754	1.32681	0.184571	0.86829
YIL158W	117.396	0.252312	0.321215	0.785491	0.432166	0.963011
YIL157C	161.247	0.127762	0.303272	0.42128	0.673551	0.995016
YIL156W-B	62.193	-0.371481	0.365283	-1.01697	0.309169	0.949546
YIL156W	46.6396	-0.0105144	0.365677	-0.0287534	0.977061	0.999774
YIL155C	214.106	-0.0500036	0.367882	-0.135923	0.891882	0.995016
YIL154C	154.773	1.60928	0.517585	3.10921	0.00187589	0.153982
YIL153W	106.21	0.325079	0.367528	0.884503	0.376425	0.963011
YIL152W	45.8811	0.483457	0.369332	1.309	0.190533	0.873904
YBR062C	53.6007	-0.0295049	0.355664	-0.082957	0.933886	0.997602
YIL151C	108.545	-0.101959	0.307907	-0.331136	0.740542	0.995016
YIL150C	8.24656	0.203003	0.692566	0.293117	0.769433	0.995016
YIL149C	112.907	0.492892	0.331762	1.48568	0.137364	0.826612
YIL148W	2191.66	-0.287863	0.269753	-1.06714	0.28591	0.94271
YIL147C	111.94	0.25734	0.315927	0.814556	0.415327	0.963011
YIL146C	16.8821	-0.181857	0.488036	-0.372631	0.709423	0.995016
YIL145C	112.139	-0.0844216	0.300928	-0.280538	0.779065	0.995016
YIL144W	53.8834	0.289693	0.370184	0.782567	0.433882	0.963011
YIL143C	104.019	0.203943	0.315732	0.645937	0.51832	0.980324
YIL142W	300.147	0.0988474	0.324427	0.304683	0.760608	0.995016
YBR063C	20.5192	-0.106579	0.476874	-0.223494	0.823151	0.995016
YIL140W	115.039	0.0428256	0.30864	0.138756	0.889643	0.995016
YIL139C	20.0905	0.354393	0.502471	0.7053	0.480623	0.973201
YIL138C	204.688	0.644336	0.280143	2.30003	0.0214466	0.474746
YIL137C	133.272	-0.426703	0.288195	-1.48061	0.138712	0.826612
YIL136W	265.452	-0.704676	0.400624	-1.75895	0.0785864	0.75924
YIL135C	159.034	0.0650336	0.34782	0.186975	0.85168	0.995016
YIL134C-A	0.677886	-0.461861	2.14735	-0.215084	0.829702	0.995016
YIL134W	27.2493	0.0333873	0.409728	0.0814863	0.935055	0.997602
YIL133C	645.91	-0.297604	0.261156	-1.13956	0.254468	0.921386
YBR065C	21.1973	-0.00897579	0.457036	-0.0196391	0.984331	0.999774
YIL132C	16.158	-0.153036	0.508018	-0.301241	0.763231	0.995016
YIL131C	115.536	0.485333	0.316913	1.53144	0.12566	0.821877
YIL130W	123.051	-0.0678388	0.286161	-0.237065	0.812606	0.995016
YIL129C	71.5601	-0.0783857	0.332494	-0.235751	0.813626	0.995016
YIL128W	49.6706	-0.594656	0.345508	-1.7211	0.0852321	0.78349
YIL127C	122.673	1.03274	0.383117	2.69563	0.00702547	0.317399
YIL126W	188.955	0.206286	0.294424	0.70064	0.483527	0.974412
YIL125W	410.696	-0.989056	0.334167	-2.95977	0.00307871	0.203895
YIL124W	278.071	-0.523438	0.468141	-1.11812	0.263516	0.929796
YIL123W	292.315	-0.0302176	0.329059	-0.0918305	0.926833	0.997602
YBR066C	67.0498	-0.173413	0.382969	-0.452811	0.650685	0.995016
YIL122W	32.225	0.483732	0.416365	1.1618	0.245318	0.91781
YIL121W	83.4574	-0.25641	0.466638	-0.549485	0.582673	0.991182
YIL120W	24.8308	0.0186301	0.499267	0.0373149	0.970234	0.999774
YIL119C	37.4936	-1.39488	0.48017	-2.90497	0.00367293	0.212573
YIL118W	184.428	-0.120147	0.267944	-0.448405	0.653861	0.995016
YIL117C	48.9864	0.90424	0.434145	2.08281	0.0372687	0.588574
YIL116W	76.0652	0.0070108	0.352906	0.0198659	0.98415	0.999774
YIL115C	127.687	-0.0743232	0.305626	-0.243184	0.807863	0.995016
YIL114C	33.0405	0.409434	0.399217	1.02559	0.305083	0.946855
YIL113W	19.584	0.134628	0.516283	0.260764	0.794275	0.995016
YBR067C	1122.11	-0.248404	0.439618	-0.565045	0.572043	0.990379
YIL112W	79.5942	0.290165	0.31697	0.915434	0.359964	0.963011
YIL111W	151.853	-0.19149	0.475866	-0.402402	0.687388	0.995016
YIL110W	47.5392	0.0592662	0.354564	0.167152	0.86725	0.995016
YIL109C	289.973	-0.208823	0.281545	-0.741703	0.458267	0.966149
YIL108W	45.9767	-0.106283	0.367027	-0.289578	0.772139	0.995016
YIL107C	74.7861	0.0646085	0.328407	0.196733	0.844036	0.995016
YIL106W	79.5556	-0.00223107	0.339127	-0.00657884	0.994751	0.999774
YIL105C	79.2245	-0.127176	0.355701	-0.357535	0.720691	0.995016
YIL105W-A	0.174342	-0.696415	4.03603	-0.17255	0.863006	0.995016
YIL104C	34.0239	0.708873	0.40076	1.76882	0.0769235	0.75924
YBR068C	197.175	-0.0460404	0.291058	-0.158183	0.874313	0.995016
YIL103W	35.3683	0.0953589	0.395876	0.240881	0.809648	0.995016
YIL102C-A	11.5217	0.924709	0.584509	1.58203	0.113643	0.813606
YIL101C	73.3089	-0.0348445	0.326329	-0.106777	0.914966	0.997602
YIL099W	7.04968	0.610404	0.710495	0.859125	0.390271	0.963011
YIL098C	76.7751	0.563323	0.319996	1.7604	0.0783392	0.75924
YIL097W	38.0386	-0.500146	0.385329	-1.29797	0.194298	0.878693
YIL096C	46.3015	0.315625	0.450236	0.70102	0.48329	0.974271
YAL039C	145.557	1.10187	0.418775	2.63117	0.00850925	0.337372
YBR069C	240.309	-0.373603	0.345957	-1.07991	0.280181	0.938169
YIL095W	37.3181	0.0801506	0.393062	0.203913	0.838421	0.995016
YIL094C	347.579	0.493176	0.301593	1.63524	0.102	0.797358
YIL093C	135.893	0.315522	0.335804	0.9396	0.347423	0.960815
YIL092W	24.6954	-0.0576562	0.430933	-0.133794	0.893566	0.995016
YIL091C	112.664	0.473622	0.412404	1.14844	0.250786	0.918077
YIL090W	67.3118	-0.0917999	0.325582	-0.281956	0.777977	0.995016
YIL089W	6.98259	0.211805	0.786914	0.269159	0.787807	0.995016
YIL088C	152.562	0.0578126	0.319004	0.181228	0.856188	0.995016
YIL087C	91.2232	-0.150953	0.394663	-0.382485	0.702102	0.995016
YBR070C	35.2858	0.58115	0.374849	1.55036	0.121056	0.817319
YIL085C	147.604	-0.0207336	0.287901	-0.0720164	0.942589	0.997602
YIL084C	38.3436	-0.18126	0.373435	-0.485384	0.627404	0.991182
YIL083C	192.654	0.0892167	0.29152	0.30604	0.759574	0.995016
YIL082W-A	129.871	-0.696374	0.356948	-1.95091	0.0510675	0.682555
YIL079C	55.2445	0.747848	0.425969	1.75564	0.0791499	0.75924
YIL078W	679.768	-0.167753	0.280105	-0.598893	0.549244	0.985673
YIL077C	62.3794	-0.0387983	0.340291	-0.114015	0.909226	0.9976
YIL076W	182.224	-0.370196	0.344441	-1.07477	0.282477	0.938169
YIL075C	422.029	0.00941898	0.28393	0.0331736	0.973536	0.999774
YBR071W	133.806	-0.190764	0.362109	-0.526812	0.598324	0.991182
YIL074C	242.664	0.620703	0.454258	1.36641	0.17181	0.861043
YIL073C	0.966553	-0.719457	1.8521	-0.388455	0.697679	0.995016
YIL072W	5.03524	0.604955	0.794346	0.761576	0.446313	0.964392
YIL071C	44.0535	0.0259179	0.37402	0.0692956	0.944754	0.997602
YIL070C	208.473	-0.181954	0.282468	-0.644158	0.519473	0.980324
YIL069C	585.438	0.160344	0.297838	0.538359	0.590329	0.991182
YIL068C	70.9963	-0.070701	0.329773	-0.214393	0.830241	0.995016
YIL067C	48.6666	0.362586	0.352803	1.02773	0.304077	0.946855
YIL066C	11.8637	0.102852	0.568267	0.180992	0.856374	0.995016
YIL065C	154.261	-0.00935577	0.29329	-0.0318994	0.974552	0.999774
YBR072W	135.214	-2.00605	1.49599	-1.34095	0.179938	0.866193
YIL064W	63.1966	0.229706	0.392755	0.584857	0.558644	0.985673
YIL063C	166.647	0.770949	0.318834	2.41803	0.0156049	0.433158
YIL062C	140.879	0.0741431	0.27988	0.26491	0.791079	0.995016
YIL061C	43.9111	0.575472	0.404528	1.42258	0.154859	0.847862
YIL060W	0.174342	-0.696415	4.03603	-0.17255	0.863006	0.995016
YIL057C	85.8719	2.68725	0.418061	6.42789	1.29384e-10	2.60645e-07
YIL056W	71.5048	-0.137553	0.321676	-0.427614	0.668932	0.995016
YIL055C	31.6204	0.102236	0.432186	0.236555	0.813002	0.995016
YBR072C-A	3.14219	0.501141	1.04757	0.478382	0.632378	0.991182
YIL053W	644.987	-0.0211518	0.286793	-0.0737529	0.941207	0.997602
YIL052C	811.786	-0.263819	0.250507	-1.05314	0.292276	0.943818
YIL051C	678.546	-0.521455	0.369907	-1.40969	0.158631	0.851291
YIL050W	94.1377	-0.421443	0.334029	-1.2617	0.207058	0.887987
YIL049W	32.0172	-0.187153	0.465386	-0.402146	0.687577	0.995016
YIL048W	63.3661	-0.28109	0.359028	-0.782921	0.433674	0.963011
YIL047C	109.431	0.0133763	0.351619	0.0380421	0.969654	0.999774
YIL046W-A	1.63658	3.20485	1.6461	1.94694	0.051542	0.682698
YIL046W	90.8733	0.781418	0.359683	2.17252	0.0298163	0.541577
YIL045W	98.7341	-1.39832	0.469113	-2.98078	0.00287517	0.193635
YBR073W	103.078	-0.0986865	0.327566	-0.301272	0.763207	0.995016
YIL044C	126.664	0.0322718	0.336856	0.0958032	0.923677	0.997602
YIL043C	479.594	0.12091	0.257387	0.469758	0.638528	0.993011
YIL042C	82.5201	0.19909	0.318035	0.626	0.531315	0.982052
YIL041W	627.477	-0.292106	0.259496	-1.12567	0.260307	0.929796
[truncated: 3,829 more rows]

## Sheet: DGY1736
gene	baseMean	log2FoldChange	lfcSE	stat	pvalue	padj
YAL068C	1.68373	1.38222	1.40331	0.984972	0.324638	0.663707
YAL061W	83.6681	-0.749154	0.26416	-2.83599	0.00456837	0.0579628
YAR071W	527.664	1.20615	0.259146	4.65431	3.25069e-06	0.000170497
YDR058C	27.1608	-0.0636421	0.371545	-0.17129	0.863995	0.958695
YDR059C	50.7892	-0.563125	0.332273	-1.69477	0.0901199	0.348892
YDR060W	274.865	0.593944	0.249862	2.37709	0.01745	0.135052
YDR061W	90.0388	-0.161067	0.244504	-0.658749	0.510057	0.802863
YDR062W	224.584	-0.0798136	0.231038	-0.345456	0.729751	0.910624
YDR063W	225.699	-0.870814	0.2325	-3.74543	0.000180084	0.00478855
YDR064W	1682.95	-0.299321	0.203103	-1.47374	0.140552	0.443568
YDR065W	14.0325	-0.878736	0.504693	-1.74113	0.0816608	0.330868
YBL113C	195.263	0.918434	0.311093	2.95228	0.0031544	0.044418
YDR066C	8.87326	-1.311	0.619366	-2.11669	0.0342864	0.205467
YDR067C	57.5674	-0.134072	0.284682	-0.470955	0.637673	0.871161
YDR068W	102.475	0.52977	0.266541	1.98758	0.0468584	0.247131
YDR069C	43.8151	-0.135256	0.327273	-0.413281	0.679401	0.891867
YDR070C	174.04	-4.35846	0.753676	-5.78293	7.34096e-09	8.56495e-07
YDR071C	366.62	-0.243471	0.205904	-1.18245	0.237028	0.576187
YDR072C	132.059	-0.149712	0.223227	-0.670674	0.502429	0.799774
YDR073W	97.9638	0.572746	0.246595	2.32262	0.0201996	0.148052
YDR074W	334.836	-1.75851	0.20621	-8.52774	1.4923e-17	5.01851e-15
YDR075W	54.1953	0.637455	0.320152	1.9911	0.0464696	0.24576
YBL112C	29.9374	1.12895	0.410402	2.75084	0.00594436	0.0697951
YDR076W	15.0035	0.653168	0.479141	1.36321	0.172817	0.49462
YDR077W	6080.27	-2.73547	0.594928	-4.59799	4.26595e-06	0.000213934
YDR078C	46.5878	0.272617	0.39159	0.69618	0.486316	0.791874
YDR079W	31.5608	-0.959264	0.429395	-2.23399	0.0254837	0.170771
YDR079C-A	26.3283	-0.082134	0.379396	-0.216486	0.828609	0.950126
YDR080W	47.8551	0.382315	0.337234	1.13368	0.25693	0.594683
YDR081C	77.9396	-0.0558072	0.267562	-0.208577	0.834779	0.95017
YDR082W	30.4263	0.506917	0.371387	1.36493	0.172275	0.494426
YDR083W	101.413	0.28392	0.257537	1.10244	0.270269	0.608393
YDR084C	86.2724	-0.523721	0.281421	-1.86099	0.0627459	0.287756
YBL111C	36.4739	0.946713	0.373596	2.53406	0.011275	0.103135
YDR085C	54.98	-0.365229	0.291889	-1.25126	0.210839	0.546791
YDR086C	334.356	0.152449	0.193421	0.788172	0.430596	0.748212
YDR087C	175.359	0.816656	0.256182	3.1878	0.00143361	0.0246866
YDR088C	64.162	0.506798	0.284855	1.77914	0.0752162	0.317657
YDR089W	59.6158	-0.662484	0.321859	-2.05831	0.0395608	0.226169
YDR090C	37.9618	-0.0632457	0.343702	-0.184013	0.854003	0.955903
YDR091C	177.549	-0.260531	0.22943	-1.13556	0.256141	0.593579
YDR092W	160.611	-0.148728	0.219826	-0.676573	0.498677	0.797121
YDR093W	186.194	0.341465	0.238898	1.42933	0.152908	0.462745
YBL108C-A	3.5555	2.13763	1.04216	2.05115	0.0402528	0.228299
YDR096W	81.8982	-0.815741	0.257793	-3.16432	0.00155446	0.0259373
YDR097C	75.7478	0.325716	0.318927	1.02129	0.307118	0.645275
YDR098C	177.705	0.119693	0.219559	0.545151	0.58565	0.844039
YDR098C-B	654.164	1.34605	0.247542	5.43768	5.398e-08	5.1434e-06
YDR098C-A	257.751	1.17925	0.257931	4.57195	4.83213e-06	0.000238149
YDR099W	822.034	-0.24112	0.196088	-1.22965	0.218828	0.557388
YDR100W	54.0759	-0.988835	0.376415	-2.62698	0.00861464	0.0858982
YDR101C	127.2	0.484834	0.227126	2.13465	0.03279	0.199367
YDR103W	63.0259	-0.53085	0.282256	-1.88074	0.0600076	0.282651
YDR104C	35.5204	0.463101	0.338364	1.36864	0.17111	0.492567
YDR105C	87.0925	-0.533872	0.270086	-1.97667	0.0480788	0.250509
YDR106W	3.71578	0.649773	0.945318	0.687359	0.491857	0.795683
YDR107C	46.927	-0.191395	0.381137	-0.502167	0.61555	0.860205
YDR108W	44.5586	-0.196931	0.319556	-0.616264	0.53772	0.818245
YDR109C	35.2392	0.700627	0.345093	2.03026	0.0423306	0.233595
YDR110W	62.0275	0.722062	0.277349	2.60344	0.00922925	0.0902804
YDR111C	49.8976	-0.270389	0.312745	-0.864568	0.387276	0.721659
YDR113C	114.054	0.607325	0.260023	2.33566	0.0195092	0.144849
YBL107C	75.668	0.276603	0.283648	0.975162	0.32948	0.66615
YDR115W	143.54	-0.198601	0.245325	-0.809544	0.418202	0.740434
YDR116C	135.762	-0.37463	0.244167	-1.53432	0.124952	0.414356
YDR117C	111.257	-0.0113776	0.236723	-0.0480627	0.961666	0.987353
YDR118W	24.4735	-0.523241	0.396339	-1.32019	0.186773	0.514432
YDR119W	159.851	-0.142082	0.225708	-0.629496	0.529025	0.814553
YDR119W-A	77.9305	-2.22795	0.336076	-6.62928	3.37327e-11	6.64999e-09
YDR120C	153.741	0.531257	0.243821	2.17889	0.0293402	0.185962
YDR121W	95.4931	0.38997	0.251591	1.55002	0.121137	0.407617
YDR122W	151.977	-0.142237	0.234568	-0.606379	0.544263	0.822944
YBL106C	53.0229	1.14407	0.339003	3.3748	0.0007387	0.0151886
YDR123C	51.9333	0.706351	0.29489	2.3953	0.0166066	0.131132
YDR124W	5.59243	0.308658	0.786445	0.392472	0.694709	0.898538
YDR125C	20.9554	-0.283057	0.435248	-0.650335	0.515476	0.805941
YDR126W	30.1962	-0.492213	0.358335	-1.37361	0.169562	0.490332
YDR127W	174.454	-0.0381085	0.218648	-0.174292	0.861636	0.957429
YDR128W	80.5645	0.357583	0.294071	1.21597	0.223995	0.563141
YDR129C	377.762	-0.176043	0.190637	-0.923443	0.355777	0.693184
YDR130C	61.4161	0.235872	0.274775	0.85842	0.390661	0.722752
YDR131C	23.856	-0.461306	0.390654	-1.18086	0.23766	0.577101
YDR132C	22.0168	-0.21913	0.397315	-0.551527	0.581273	0.840875
YBL105C	168.1	-0.0276618	0.24687	-0.11205	0.910783	0.972226
YDR134C	1332.31	-0.630486	0.265317	-2.37636	0.0174846	0.135062
YDR135C	152.588	0.0165426	0.239289	0.0691321	0.944884	0.982579
YDR137W	47.9997	0.185564	0.304855	0.608696	0.542726	0.821489
YDR138W	72.664	0.107597	0.283004	0.380198	0.703799	0.901954
YDR139C	156.222	-0.089426	0.22976	-0.389215	0.697117	0.898538
YDR140W	37.937	-0.263423	0.332372	-0.792553	0.428038	0.746467
YDR141C	93.9058	-0.519313	0.253505	-2.04853	0.0405078	0.228837
YDR142C	34.33	-0.655407	0.353775	-1.85261	0.0639382	0.289648
YDR143C	131.408	-0.00288584	0.237849	-0.0121331	0.990319	0.997122
YDR144C	123.95	0.552942	0.254206	2.17518	0.0296169	0.187094
YBL104C	53.6307	0.374049	0.285029	1.31232	0.189412	0.518082
YDR145W	172.798	0.514433	0.225173	2.28461	0.0223357	0.156431
YDR146C	121.224	0.135696	0.233949	0.580024	0.561898	0.832848
YDR147W	71.9026	0.14098	0.259895	0.542448	0.58751	0.844039
YDR148C	506.437	-0.64397	0.196368	-3.2794	0.00104028	0.019628
YDR150W	399.939	0.323082	0.251859	1.28279	0.199567	0.529917
YDR151C	62.7599	0.00984616	0.296029	0.0332608	0.973467	0.992128
YDR152W	295.118	0.526045	0.204496	2.57239	0.0100998	0.0963532
YDR153C	158.369	0.331331	0.218625	1.51552	0.129641	0.422848
YDR155C	1814.69	-0.722213	0.246765	-2.92673	0.00342549	0.0468863
YDR156W	72.5066	0.0914695	0.264551	0.345755	0.729527	0.910624
YAL060W	223.123	-0.00435653	0.253817	-0.017164	0.986306	0.996026
YBL103C	86.615	0.170192	0.265797	0.640308	0.521973	0.809801
YDR158W	678.983	-0.666062	0.227267	-2.93074	0.00338153	0.0466962
YDR159W	94.1432	-0.0607287	0.241934	-0.251013	0.801804	0.941128
YDR160W	52.7194	-0.451886	0.317226	-1.42449	0.154304	0.465518
YDR161W	73.1897	0.549562	0.278594	1.97263	0.0485383	0.251125
YDR162C	86.4929	0.250933	0.24758	1.01354	0.310802	0.649326
YDR163W	47.5276	0.1718	0.332113	0.517293	0.604952	0.855008
YDR164C	110.712	0.0231242	0.243107	0.0951193	0.92422	0.978294
YDR165W	86.6134	-0.0652608	0.252747	-0.258206	0.796248	0.938781
YDR166C	51.8817	-0.138135	0.299232	-0.461631	0.644346	0.876385
YDR167W	141.434	0.416913	0.227908	1.8293	0.0673542	0.298963
YBL102W	74.7806	-0.641295	0.276993	-2.3152	0.0206018	0.150039
YDR168W	209.789	0.245202	0.221082	1.1091	0.267386	0.606606
YDR169C	121.895	0.0618206	0.262356	0.235636	0.813715	0.94457
YDR170C	230.112	-0.0736967	0.230842	-0.319251	0.749536	0.919475
YDR170W-A	43.5624	0.0408915	0.314299	0.130104	0.896484	0.968847
YDR171W	210.712	-1.3187	0.245463	-5.37229	7.77444e-08	7.28631e-06
YDR172W	323.205	0.477734	0.239316	1.99625	0.0459072	0.244141
YDR173C	28.054	0.443504	0.370734	1.19629	0.231585	0.570835
YDR174W	594.284	0.069983	0.20523	0.340997	0.733106	0.910945
YBL101C	65.7615	-0.179772	0.286727	-0.62698	0.530672	0.815552
YDR175C	115.052	0.0361841	0.250285	0.144571	0.885049	0.966189
YDR176W	102.788	0.329134	0.248496	1.3245	0.185336	0.512916
YDR177W	305.331	0.557164	0.224678	2.47983	0.0131446	0.11508
YDR178W	193.903	-1.0655	0.247843	-4.29911	1.71485e-05	0.000666925
YDR179C	20.4518	0.813903	0.437718	1.85942	0.0629671	0.287756
YDR179W-A	14.6896	-0.205549	0.52633	-0.390533	0.696143	0.898538
YDR180W	26.5248	-0.397041	0.378193	-1.04984	0.293793	0.633902
YDR181C	48.7127	0.665938	0.29999	2.21987	0.0264277	0.173863
YDR182W	195.257	-0.47701	0.220163	-2.16662	0.0302636	0.189712
YDR182W-A	2.1155	-0.918044	2.48087	-0.370049	0.711346	0.90594
YDR183W	40.9286	-0.107141	0.329327	-0.325334	0.744928	0.916315
YDR184C	63.2494	-0.018804	0.274499	-0.0685031	0.945385	0.982864
YDR185C	23.7117	-0.672208	0.417693	-1.60933	0.107543	0.384084
YDR186C	276.985	0.138215	0.214122	0.645497	0.518605	0.808527
YDR188W	290.299	0.476952	0.233651	2.0413	0.0412208	0.231038
YDR189W	136.225	-0.141968	0.241176	-0.588648	0.556097	0.829647
YDR190C	376.257	0.415366	0.203867	2.03744	0.0416064	0.232289
YDR191W	12.298	-0.349987	0.54874	-0.6378	0.523604	0.81059
YDR192C	48.0964	-0.02122	0.316308	-0.0670864	0.946513	0.983139
YDR194C	226.777	0.178383	0.21797	0.818384	0.413138	0.738116
YBL100W-B	80.8989	0.911636	0.273651	3.33138	0.000864168	0.0168616
YDR195W	36.9301	0.262987	0.327918	0.801991	0.422558	0.743097
YDR196C	131.663	-0.0752166	0.228467	-0.329224	0.741987	0.914859
YDR197W	31.7099	-0.791321	0.382488	-2.06888	0.0385575	0.222255
YDR198C	46.421	0.049062	0.297809	0.164743	0.869146	0.960075
YDR200C	104.203	0.42209	0.23625	1.78663	0.073998	0.315001
YDR201W	75.7958	0.32405	0.308227	1.05133	0.293105	0.633289
YDR202C	56.7748	-0.510458	0.28589	-1.78551	0.0741792	0.315335
YDR204W	149.159	-0.502213	0.240245	-2.09042	0.0365804	0.214349
YDR205W	58.9858	-0.338287	0.290382	-1.16497	0.24403	0.5813
YBL100W-A	5.94494	0.996046	0.736245	1.35287	0.176096	0.498423
YDR206W	95.1138	0.074857	0.247823	0.302059	0.762607	0.924279
YDR207C	84.2826	0.0740476	0.264094	0.280384	0.779183	0.931377
YDR208W	131.715	0.0818076	0.223568	0.365919	0.714426	0.906901
YDR210W	69.7053	0.0154813	0.277693	0.0557496	0.955541	0.985359
YDR210W-B	50.5396	0.250691	0.302569	0.828541	0.407364	0.733876
YDR210W-A	18.4703	0.111506	0.436996	0.255164	0.798597	0.939824
YDR210C-D	707.154	1.20429	0.23768	5.06688	4.04397e-07	2.78547e-05
YDR210C-C	197.866	1.35775	0.258348	5.2555	1.47626e-07	1.24115e-05
YDR211W	195.602	0.492813	0.24246	2.03255	0.0420975	0.232793
YDR212W	248.533	0.185778	0.210887	0.880937	0.378352	0.712933
YDR213W	45.5674	0.38386	0.324436	1.18316	0.236746	0.576187
YDR214W	205.194	-0.116291	0.255034	-0.455981	0.648403	0.87694
YDR216W	132.931	-0.506836	0.289565	-1.75033	0.0800606	0.327784
YDR217C	62.8142	0.666698	0.298509	2.23343	0.0255207	0.170771
YDR218C	1.23893	0.437877	1.63029	0.268588	0.788247	0.934483
YDR219C	46.0858	0.208839	0.31822	0.656274	0.511648	0.803597
YDR221W	60.9112	0.217857	0.334002	0.652263	0.514231	0.805535
YDR222W	4.54242	-1.49142	0.868314	-1.7176	0.0858687	0.341319
YDR223W	8.28228	0.350829	0.62771	0.558903	0.576228	0.83867
YBL099W	1285.55	-0.316684	0.223772	-1.41521	0.157007	0.469216
YDR224C	754.402	0.0194895	0.194004	0.100459	0.91998	0.975974
YDR225W	725.867	-0.0907124	0.198408	-0.4572	0.647527	0.8764
YDR226W	447.845	-0.382619	0.199969	-1.91339	0.0556977	0.271701
YDR227W	56.8662	0.490546	0.31752	1.54493	0.122362	0.40981
YDR228C	55.6099	0.248607	0.301136	0.825564	0.409051	0.73493
YDR229W	86.0223	0.508168	0.249732	2.03485	0.0418656	0.232779
YDR231C	60.3837	-0.418594	0.290546	-1.44072	0.149664	0.458538
YDR232W	182.92	-0.236691	0.257931	-0.917653	0.358801	0.696288
YDR233C	591.815	-0.310858	0.209987	-1.48037	0.138775	0.441299
YDR234W	104.211	0.595091	0.244392	2.43499	0.0148923	0.122571
YBL098W	46.4347	-0.359171	0.314822	-1.14087	0.253924	0.590949
YDR235W	40.5361	-0.405413	0.328864	-1.23277	0.217663	0.55627
YDR236C	45.4697	-0.42415	0.328645	-1.2906	0.196842	0.527954
YDR237W	85.2745	-0.339154	0.264205	-1.28368	0.199254	0.529831
YDR238C	303.213	-0.163715	0.239632	-0.683194	0.494484	0.796004
YDR239C	51.3534	0.333141	0.31853	1.04587	0.295621	0.635601
YDR240C	49.6748	0.0558886	0.302037	0.185039	0.853198	0.955856
YDR242W	17.0673	0.535083	0.445063	1.20226	0.229261	0.568426
YDR243C	36.5972	0.613252	0.32977	1.85964	0.0629371	0.287756
YDR244W	62.8579	0.57176	0.278824	2.05061	0.0403051	0.228369
YBL097W	25.5229	0.584174	0.382316	1.52799	0.126516	0.41844
YDR245W	212.903	0.132059	0.222169	0.594407	0.55224	0.82778
YDR246W	122.882	-0.195684	0.246319	-0.794435	0.426942	0.746203
YDR246W-A	3.18153	0.525706	0.968589	0.542754	0.587299	0.844039
YDR247W	39.1779	-0.520777	0.345409	-1.50771	0.131628	0.426373
YDR248C	51.6472	0.18021	0.315173	0.571782	0.56747	0.835279
YDR249C	21.3304	-0.0641409	0.428253	-0.149773	0.880943	0.964328
YDR251W	156.71	-0.263231	0.237698	-1.10742	0.268113	0.607532
YDR252W	12.7659	-0.0968498	0.503886	-0.192206	0.847581	0.953894
YDR253C	20.4883	0.578139	0.463134	1.24832	0.211913	0.547946
YDR254W	20.643	-0.130063	0.422796	-0.307626	0.758367	0.922465
YAL059W	60.305	0.243615	0.280685	0.867928	0.385434	0.720972
YBL095W	22.4249	-0.261531	0.437111	-0.598317	0.549629	0.825165
YDR255C	41.9348	-0.315918	0.350422	-0.901538	0.367302	0.701882
YDR256C	7.97168	0.797943	0.667445	1.19552	0.231884	0.571168
YDR257C	54.485	0.636773	0.291981	2.18087	0.0291927	0.185439
YDR258C	165.374	-0.15366	0.255283	-0.60192	0.547227	0.824218
YDR259C	24.3255	0.0834941	0.401895	0.207751	0.835423	0.95017
YDR260C	85.7207	0.0108532	0.254874	0.0425826	0.966034	0.989206
YDR261C	126.943	0.0872992	0.262593	0.332451	0.739549	0.914442
YDR261W-B	115.024	1.23577	0.267081	4.62694	3.71103e-06	0.000189428
YDR261W-A	12.3762	1.23154	0.550168	2.23849	0.0251894	0.169734
YBL093C	144.636	0.65675	0.234048	2.80605	0.00501527	0.0616608
YDR261C-D	621.879	0.784906	0.180305	4.35321	1.34156e-05	0.000541424
YDR261C-C	87.9518	1.67533	0.31332	5.34701	8.94169e-08	8.2451e-06
YDR262W	106.348	-0.250855	0.263899	-0.95057	0.341823	0.67946
YDR263C	8.19732	1.00979	0.6428	1.57093	0.116199	0.397859
YDR264C	229.81	0.518954	0.220277	2.35592	0.0184771	0.139584
YDR265W	40.0082	0.389799	0.333184	1.16992	0.242032	0.579521
YDR266C	70.0267	-0.153216	0.259141	-0.591246	0.554356	0.829252
YDR267C	88.6769	0.166834	0.251689	0.662857	0.507422	0.802184
YDR268W	29.8811	-0.151298	0.388485	-0.389455	0.696939	0.898538
YBL092W	3950.07	-0.184339	0.236564	-0.779236	0.435841	0.752553
YDR270W	84.6862	1.25343	0.339118	3.69614	0.000218899	0.00566264
YDR272W	107.087	-0.255177	0.299923	-0.850809	0.394876	0.725952
YDR273W	12.35	0.571916	0.537454	1.06412	0.287274	0.626371
YDR275W	110.977	0.195576	0.270848	0.722088	0.47024	0.779011
YDR276C	498.572	-0.641077	0.233121	-2.74997	0.00596003	0.0698227
YDR277C	403.764	0.698116	0.216154	3.22972	0.00123912	0.0224891
YDR279W	38.816	0.134765	0.320279	0.420774	0.67392	0.889382
YDR280W	92.2203	0.402631	0.290115	1.38783	0.165188	0.483059
YDR281C	246.635	1.11827	0.244507	4.57359	4.79439e-06	0.000238149
YBL091C-A	59.8345	-0.401166	0.321149	-1.24916	0.211607	0.547402
YDR282C	32.8998	0.404768	0.345451	1.17171	0.241315	0.578658
YDR283C	77.8766	-0.0737408	0.276071	-0.267108	0.789386	0.935126
YDR284C	121.407	-0.526438	0.240436	-2.18951	0.0285598	0.183045
YDR285W	18.249	0.0252037	0.466499	0.0540273	0.956913	0.985961
YDR286C	21.3116	-0.338582	0.415941	-0.814013	0.415637	0.739449
YDR287W	46.5126	-0.134081	0.325447	-0.411991	0.680346	0.892562
YDR288W	54.1677	-0.142099	0.31216	-0.455213	0.648956	0.87694
YDR289C	68.766	0.413858	0.272066	1.52117	0.128218	0.42142
YDR291W	56.5321	0.0419405	0.328727	0.127585	0.898478	0.969665
YDR292C	113.289	0.0438285	0.249896	0.175387	0.860775	0.957031
YBL091C	469.068	-0.0753472	0.188449	-0.399828	0.689284	0.898179
YDR293C	217.286	-0.198275	0.216417	-0.916172	0.359577	0.696834
YDR294C	190.705	-0.21591	0.210013	-1.02808	0.303912	0.642078
YDR295C	43.471	0.807548	0.353663	2.28338	0.0224079	0.156609
YDR296W	114.203	0.521129	0.243827	2.13729	0.0325748	0.199216
YDR297W	256.098	-0.0146757	0.226124	-0.0649011	0.948253	0.983877
YDR298C	328.964	-0.588306	0.213737	-2.75247	0.00591468	0.0697201
YDR299W	124.229	0.550239	0.23459	2.34553	0.019	0.142363
YDR300C	129.939	0.343195	0.267037	1.2852	0.198723	0.529772
YDR301W	67.669	-0.159518	0.293084	-0.544274	0.586253	0.844039
YDR302W	40.7225	-0.0537846	0.311232	-0.172812	0.862799	0.95805
YBL090W	93.4788	-0.154003	0.241817	-0.636858	0.524218	0.811083
YDR303C	62.0116	0.146107	0.305957	0.477542	0.632976	0.870633
YDR304C	594.011	-0.487818	0.211369	-2.3079	0.0210047	0.151643
YDR305C	40.4639	-0.0259159	0.313683	-0.0826181	0.934155	0.980987
YDR306C	48.2453	-0.330105	0.295697	-1.11636	0.264267	0.60336
YDR307W	68.3265	-0.413031	0.292317	-1.41296	0.157668	0.470452
YDR308C	126.896	0.0412735	0.263776	0.156472	0.875661	0.961731
YDR309C	271.965	-0.199579	0.234562	-0.850855	0.39485	0.725952
YDR310C	158.74	0.313235	0.217975	1.43702	0.150711	0.460265
YDR311W	74.9056	0.302742	0.267417	1.1321	0.257593	0.595255
YBL089W	38.2502	-0.492927	0.339038	-1.4539	0.145974	0.451588
YDR312W	106.071	0.754015	0.268093	2.81251	0.00491565	0.0609704
YDR313C	57.4538	0.303914	0.291573	1.04233	0.297261	0.637449
YDR314C	17.2122	-0.308829	0.441508	-0.699486	0.484248	0.790522
YDR315C	23.3822	0.160129	0.402759	0.39758	0.69094	0.898363
YDR316W	69.1124	0.00342579	0.297036	0.0115332	0.990798	0.997428
YDR316W-B	65.2566	1.42501	0.351501	4.05408	5.03323e-05	0.00167296
YDR317W	3.63669	-0.517177	0.917176	-0.56388	0.572836	0.837143
YDR318W	48.8665	-0.00798445	0.298534	-0.0267455	0.978663	0.994139
YBL088C	50.7846	-0.0717833	0.296564	-0.24205	0.808741	0.942161
YDR319C	30.9854	0.132447	0.397309	0.333361	0.738862	0.914442
YDR320C	72.8413	-0.0436414	0.278573	-0.15666	0.875513	0.961731
YDR320C-A	54.3472	-0.664303	0.294557	-2.25526	0.024117	0.164531
YDR321W	135.03	0.0555263	0.231959	0.23938	0.810811	0.943691
YDR322W	77.0821	-0.435286	0.280251	-1.5532	0.120376	0.405772
YDR322C-A	299.447	-0.155705	0.219696	-0.708732	0.478491	0.785938
YDR323C	31.8792	-0.206209	0.358536	-0.575141	0.565196	0.834671
YDR324C	136.671	0.375519	0.256823	1.46217	0.143695	0.447443
YDR325W	62.8662	0.331438	0.29945	1.10682	0.268371	0.607677
YDR326C	83.1822	-0.148515	0.265001	-0.560432	0.575185	0.838219
YBL087C	588.515	-0.273612	0.206243	-1.32665	0.184625	0.511635
YDR328C	492.196	0.367153	0.216893	1.69278	0.0904974	0.34915
YDR329C	131.012	0.376555	0.233189	1.61481	0.106353	0.382256
YDR330W	140.764	0.0129522	0.233448	0.0554821	0.955754	0.985371
YDR331W	54.8221	-0.452727	0.285622	-1.58506	0.112953	0.392795
YDR332W	27.2133	0.739255	0.383478	1.92776	0.0538847	0.264656
YDR333C	81.1193	0.0654978	0.309366	0.211716	0.832328	0.950126
YDR334W	116.386	0.53831	0.242826	2.21686	0.026633	0.174811
YDR335W	158.123	-0.151175	0.233358	-0.647824	0.517099	0.807058
YDR336W	29.0129	0.0241771	0.39747	0.0608275	0.951497	0.984099
YDR337W	78.5288	0.0831345	0.261251	0.318217	0.75032	0.919475
YBL086C	102.044	0.310058	0.261146	1.1873	0.23511	0.573187
YDR338C	53.7159	-0.0381856	0.29801	-0.128135	0.898042	0.969665
YDR339C	105.291	0.00312037	0.242197	0.0128836	0.989721	0.99687
YDR341C	347.215	-0.0170226	0.200465	-0.0849152	0.932329	0.979982
YDR342C	2213.68	0.17453	0.194827	0.89582	0.370349	0.705526
YDR343C	2088.1	0.154361	0.189174	0.815977	0.414513	0.739168
YDR345C	74.4945	0.681779	0.31616	2.15644	0.0310495	0.193719
YDR346C	445.507	0.370956	0.224823	1.64999	0.0989454	0.368036
YDR347W	117.991	-0.558408	0.26573	-2.10141	0.0356052	0.210782
YDR348C	179.419	0.266179	0.222535	1.19612	0.231649	0.570835
YAL058W	40.9475	-1.38416	0.332146	-4.16733	3.08194e-05	0.00112226
YBL085W	172.461	0.163565	0.226516	0.722088	0.470241	0.779011
YDR349C	154.893	-0.132261	0.218229	-0.606064	0.544472	0.823042
YDR350C	60.9749	-0.100228	0.295345	-0.339358	0.73434	0.911589
YDR351W	68.3173	0.00442308	0.28695	0.0154141	0.987702	0.996258
YDR352W	41.7117	-0.350594	0.325709	-1.0764	0.281748	0.620475
YDR353W	529.223	-0.133891	0.190951	-0.701182	0.48319	0.789933
YDR354W	108.845	0.14321	0.244915	0.584734	0.558727	0.830463
YDR356W	84.1212	0.503826	0.30293	1.66318	0.0962766	0.362114
YDR357C	54.8825	-0.484971	0.346956	-1.39779	0.162177	0.478414
YDR358W	98.5357	0.110241	0.243343	0.453026	0.65053	0.877142
YBL084C	33.4185	-0.383408	0.344821	-1.11191	0.266179	0.604587
YDR359C	71.9853	0.703528	0.314273	2.23859	0.0251827	0.169734
YDR361C	169.563	0.269072	0.257261	1.04591	0.295603	0.635601
YDR362C	68.2325	0.223348	0.275449	0.810853	0.41745	0.740434
YDR363W	44.5387	0.10928	0.327084	0.334102	0.738303	0.914374
YDR363W-A	257.589	0.0320958	0.286799	0.11191	0.910894	0.972226
YDR364C	68.0489	-0.190478	0.287633	-0.662227	0.507826	0.802184
YDR365C	614.553	0.480371	0.223488	2.14942	0.0316008	0.195945
YDR365W-B	395.209	0.468976	0.275722	1.7009	0.0889614	0.347138
YDR365W-A	2.47571	2.74198	1.38206	1.98398	0.0472581	0.24855
YBL082C	90.11	-0.00796339	0.256393	-0.0310593	0.975222	0.992967
YDR366C	13.532	6.26606	1.26529	4.95228	7.33496e-07	4.76522e-05
YDR367W	46.9505	-0.769168	0.336569	-2.28532	0.0222941	0.156431
YDR368W	149.889	-1.17474	0.258535	-4.54383	5.524e-06	0.000267633
YDR369C	17.3401	-0.347995	0.458415	-0.759126	0.447777	0.762025
YDR370C	60.8612	0.289969	0.295033	0.982834	0.325689	0.664513
YDR371W	51.0209	-0.267439	0.295161	-0.906079	0.364894	0.700268
YDR372C	187.163	0.0428363	0.210252	0.203738	0.838558	0.95017
YDR373W	52.2259	-0.402714	0.312865	-1.28718	0.198031	0.529772
YDR374C	1.01628	-0.0581132	1.74534	-0.0332961	0.973438	0.992128
YDR374W-A	21.3594	-0.661247	0.423722	-1.56057	0.118626	0.402961
YBL081W	94.2066	0.127634	0.274129	0.465598	0.641504	0.874666
YDR375C	72.7262	-0.0307789	0.275902	-0.111557	0.911175	0.972226
YDR376W	71.4838	-0.0729684	0.27144	-0.268819	0.788069	0.934483
YDR377W	398.49	-0.855504	0.220626	-3.87762	0.000105482	0.00304625
YDR378C	274.158	-0.0375862	0.231944	-0.162049	0.871268	0.960474
YDR379W	82.5059	0.247049	0.252472	0.978518	0.327818	0.665059
YDR379C-A	50.0697	-1.90659	0.851327	-2.23955	0.0251202	0.169734
YDR380W	45.0427	-1.35658	0.324644	-4.17869	2.93196e-05	0.00107449
YDR381W	387.735	0.179853	0.186098	0.966441	0.333823	0.671217
YDR381C-A	38.5845	-0.0451097	0.381289	-0.118308	0.905823	0.970143
YDR382W	1315.65	-0.315948	0.192593	-1.64049	0.100903	0.370971
YBL080C	43.6439	-0.175225	0.310243	-0.564799	0.572211	0.836753
YDR383C	36.5323	0.349327	0.336447	1.03828	0.299137	0.638478
YDR384C	52.4772	0.668	0.345642	1.93264	0.0532809	0.262592
YDR385W	3746.18	-0.216951	0.211593	-1.02532	0.305211	0.643159
YDR386W	26.4971	0.404649	0.377793	1.07109	0.28413	0.623066
YDR387C	48.5152	-0.643371	0.310097	-2.07474	0.0380104	0.221205
YDR388W	361.407	-0.154515	0.183981	-0.839838	0.400999	0.730797
YDR389W	96.3318	-0.0424097	0.266049	-0.159405	0.87335	0.961213
YDR390C	94.4158	-0.00664329	0.256929	-0.0258565	0.979372	0.994421
YDR391C	104.42	-1.38222	0.293002	-4.71746	2.38805e-06	0.000128797
YBL079W	117.502	0.01945	0.24988	0.0778373	0.937957	0.981657
YDR392W	62.4153	0.667108	0.276914	2.40908	0.0159926	0.127874
YDR393W	53.3814	0.0394596	0.297464	0.132654	0.894467	0.968667
YDR394W	357.186	0.0336449	0.199598	0.168563	0.86614	0.959062
YDR395W	115.523	-0.0714849	0.242316	-0.295007	0.767989	0.927009
YDR397C	194.679	0.0592302	0.215003	0.275485	0.782943	0.932324
YDR398W	181.808	0.382719	0.231454	1.65354	0.0982206	0.366532
YDR399W	201.013	-0.11841	0.244361	-0.48457	0.627981	0.868902
YDR400W	45.8159	-0.0466562	0.313554	-0.148798	0.881713	0.964493
YDR402C	1.36555	0.827497	1.46468	0.564966	0.572097	0.836753
YDR403W	2.23767	0.266463	1.2107	0.22009	0.825801	0.948966
YBL078C	60.8315	-0.513275	0.291495	-1.76083	0.0782664	0.324238
YDR404C	97.8814	-0.278345	0.256454	-1.08536	0.277763	0.617407
YDR405W	211.398	0.297588	0.232341	1.28082	0.200255	0.530273
YDR406W	81.1619	-0.0982839	0.275887	-0.356247	0.721656	0.908946
YDR407C	75.0691	0.000503316	0.272636	0.00184611	0.998527	0.999051
YDR408C	150.663	-0.00707159	0.252306	-0.0280279	0.97764	0.993806
YDR409W	27.5038	-0.00804671	0.376615	-0.0213658	0.982954	0.995491
YDR410C	28.5415	-0.323663	0.357313	-0.905825	0.365029	0.700292
YDR411C	92.5123	-0.217522	0.244849	-0.888394	0.374329	0.708387
YDR412W	124.11	0.725424	0.257521	2.81695	0.00484821	0.0606503
YDR414C	22.4733	-0.0757715	0.394933	-0.191859	0.847852	0.953897
YBL076C	626.839	-0.16905	0.216358	-0.781346	0.434599	0.751091
YDR415C	67.2543	-0.102543	0.266792	-0.384355	0.700715	0.900048
YDR416W	35.6121	0.268711	0.360034	0.746349	0.455457	0.76855
YDR418W	1183.92	-0.42413	0.201927	-2.10041	0.0356926	0.211018
YDR419W	35.4493	-0.00681852	0.339219	-0.0201006	0.983963	0.996026
YDR420W	97.3544	0.039076	0.241968	0.161492	0.871706	0.96059
YDR421W	38.4797	0.182483	0.323148	0.564705	0.572274	0.836753
YDR422C	84.8754	0.00996191	0.291145	0.0342163	0.972705	0.992128
YDR423C	76.8234	0.2987	0.271217	1.10133	0.270753	0.608928
YDR424C	161.323	-0.0446923	0.251089	-0.177994	0.858728	0.955903
YBL075C	35.9556	-0.155789	0.329926	-0.472193	0.636789	0.87105
YDR425W	37.6047	0.0707984	0.324615	0.218099	0.827352	0.949793
YDR427W	195.673	-0.655366	0.226097	-2.89861	0.00374823	0.0501285
YDR428C	61.4475	-0.735075	0.297647	-2.46962	0.0135256	0.11628
YDR429C	468.264	0.5373	0.188391	2.85205	0.00434384	0.0558233
YDR430C	79.8612	-0.178942	0.263099	-0.680132	0.496421	0.796189
YDR432W	564.835	0.0531003	0.204789	0.259293	0.795409	0.938735
YDR434W	128.83	-0.263993	0.244604	-1.07927	0.280469	0.620011
YDR435C	56.734	-0.274878	0.31012	-0.886361	0.375423	0.709293
YDR436W	65.9185	-0.159359	0.269593	-0.59111	0.554447	0.829252
YDR437W	13.0061	0.219983	0.512659	0.429102	0.667849	0.887103
YBL074C	11.2389	0.869862	0.565736	1.53758	0.124152	0.413057
YDR438W	16.3879	-0.306865	0.46125	-0.665289	0.505866	0.801202
YDR439W	45.0395	0.256414	0.307714	0.833287	0.404683	0.733142
YDR440W	66.5172	0.433149	0.288269	1.50259	0.132946	0.429846
YDR441C	56.4232	0.120592	0.315058	0.382763	0.701896	0.900929
YDR443C	44.2448	0.147736	0.335536	0.4403	0.65972	0.882082
YDR444W	78.7865	0.356917	0.259947	1.37304	0.169741	0.490354
YDR447C	619.825	-0.386213	0.206278	-1.87229	0.0611668	0.28384
YDR448W	53.3578	0.0879432	0.315246	0.278967	0.78027	0.931377
YAL056W	85.1672	-1.05352	0.260353	-4.04649	5.1991e-05	0.00170823
YDR449C	55.6551	0.774877	0.296039	2.61748	0.00885806	0.0879193
YDR450W	1991.82	-0.178898	0.196801	-0.90903	0.363334	0.698917
YDR451C	128.989	0.122132	0.235421	0.518782	0.603913	0.854385
YDR452W	244.839	0.168592	0.23884	0.705876	0.480265	0.786952
YDR453C	24.9429	-1.69471	0.852305	-1.98838	0.0467692	0.246973
YDR454C	257.963	-0.289758	0.242095	-1.19688	0.231354	0.570835
YDR456W	99.3588	-0.0245087	0.241413	-0.101522	0.919136	0.975677
YDR457W	201.252	-0.32454	0.23042	-1.40847	0.158991	0.47292
YDR458C	83.4371	0.00257832	0.253096	0.0101871	0.991872	0.997912
YDR459C	31.5049	-0.0688405	0.368101	-0.187015	0.851649	0.955349
YBL072C	3514.85	-0.10021	0.216705	-0.462425	0.643776	0.876253
YDR460W	71.0502	0.242444	0.299406	0.809749	0.418084	0.740434
YDR461W	163.49	-3.01044	0.277874	-10.8338	2.38002e-27	2.72132e-24
YDR461C-A	61.5753	0.980201	0.340106	2.88205	0.00395101	0.0520502
YDR462W	123.194	0.119548	0.25446	0.46981	0.63849	0.872014
YDR463W	207.123	0.383953	0.214469	1.79025	0.0734136	0.314622
YDR464W	93.504	0.307867	0.267279	1.15186	0.24938	0.586654
YDR465C	233.406	0.513077	0.225828	2.27198	0.0230877	0.159991
YDR466W	104.46	-0.178291	0.252155	-0.707068	0.479524	0.786748
YDR468C	103.524	0.264433	0.240096	1.10136	0.270739	0.608928
YDR469W	94.3498	0.250539	0.251533	0.996049	0.319226	0.6575
YBL071C-B	4.55019	-0.00724839	0.826221	-0.00877294	0.993	0.998239
YDR470C	54.4807	-0.261949	0.310286	-0.844218	0.398547	0.728776
YDR471W	1105.88	0.0761611	0.209607	0.363352	0.716342	0.906944
YDR472W	44.3702	-0.773846	0.319024	-2.42567	0.0152802	0.124086
YDR473C	60.087	0.58272	0.286528	2.03373	0.0419792	0.232779
YDR475C	69.0693	-0.49102	0.281195	-1.74619	0.0807786	0.328691
YDR476C	149.35	0.586108	0.239313	2.44913	0.0143203	0.119569
YDR477W	187.565	-0.113488	0.235961	-0.480962	0.630544	0.869407
YDR478W	12.8363	-0.0454248	0.515796	-0.0880673	0.929823	0.979714
YDR479C	103.217	-0.286561	0.239773	-1.19513	0.232035	0.571293
YBL071W-A	40.1254	0.566397	0.338896	1.6713	0.0946627	0.358639
YDR480W	42.3003	0.416455	0.322275	1.29223	0.196276	0.527556
YDR481C	304.23	0.0365084	0.201467	0.181213	0.856201	0.955903
YDR482C	106.044	0.61223	0.308952	1.98164	0.04752	0.248784
YDR483W	334.145	-0.377991	0.221593	-1.70579	0.0880477	0.345832
YDR484W	30.1367	-0.291866	0.353263	-0.826202	0.40869	0.734511
YDR485C	95.4594	0.516275	0.251031	2.05662	0.0397233	0.226658
YDR486C	130.231	-0.0449005	0.237729	-0.188872	0.850193	0.954922
YDR487C	275.232	-0.0360178	0.199188	-0.180823	0.856507	0.955903
YDR488C	44.0401	1.06582	0.341107	3.1246	0.0017805	0.0287482
YDR489W	32.3456	-0.203854	0.3476	-0.586461	0.557566	0.830321
YBL069W	50.7228	0.140196	0.295086	0.4751	0.634715	0.870877
YDR490C	104.119	0.0524514	0.244736	0.214318	0.830299	0.950126
YDR492W	93.8116	-0.650367	0.35201	-1.84758	0.0646633	0.291593
YDR493W	38.045	-0.564386	0.338824	-1.66572	0.0957694	0.361395
YDR494W	143.978	-0.148626	0.228093	-0.651601	0.514659	0.805669
YDR495C	51.8748	0.185441	0.295925	0.626647	0.53089	0.815647
YDR496C	205.545	0.454826	0.240057	1.89466	0.0581381	0.277626
YDR497C	1022.47	1.24893	0.259852	4.8063	1.53751e-06	8.87873e-05
YDR498C	82.3603	-0.486692	0.271957	-1.78959	0.07352	0.314709
YDR499W	41.9928	0.503372	0.312402	1.61129	0.107116	0.383697
YDR500C	2059.41	-0.0374785	0.249966	-0.149934	0.880816	0.964328
YBL068W	88.4442	0.14253	0.252942	0.563489	0.573102	0.837184
YDR501W	25.6468	0.183709	0.401687	0.457343	0.647425	0.8764
YDR502C	493.784	0.911527	0.283089	3.21993	0.0012822	0.0229978
YDR503C	36.6781	-0.400438	0.335832	-1.19238	0.233113	0.572469
YDR504C	3.07001	-0.612302	1.02293	-0.598578	0.549454	0.825165
YDR505C	92.4892	-0.250883	0.279582	-0.897351	0.369532	0.704674
YDR506C	27.1939	0.485029	0.378288	1.28217	0.199783	0.529963
YDR507C	142.9	0.679616	0.301209	2.2563	0.0240521	0.164531
YDR508C	521.887	-0.309293	0.192232	-1.60895	0.107627	0.384084
YDR510W	461.332	-0.123572	0.195844	-0.630969	0.52806	0.813945
YBL067C	86.2655	0.220285	0.259666	0.848337	0.39625	0.726777
YDR511W	57.2738	-0.337013	0.28356	-1.18851	0.234634	0.572905
YDR512C	94.9134	-0.10413	0.302208	-0.344563	0.730423	0.910624
YDR513W	156.746	-1.44452	0.271249	-5.32543	1.00715e-07	9.13951e-06
YDR514C	48.6506	0.771828	0.317918	2.42776	0.0151924	0.123586
YDR515W	33.5121	0.544291	0.354705	1.53449	0.12491	0.414356
YDR516C	543.791	-0.931248	0.191015	-4.87527	1.0866e-06	6.7523e-05
YDR517W	301.562	0.0569571	0.195569	0.291237	0.77087	0.928567
YDR518W	178.732	-0.256462	0.226431	-1.13262	0.257372	0.594984
YDR519W	64.5661	-0.165765	0.288737	-0.574104	0.565897	0.834671
YDR520C	45.7268	-0.317738	0.317616	-1.00038	0.317125	0.656908
YBL066C	87.8804	-0.00572101	0.297775	-0.0192125	0.984672	0.996026
YDR523C	5.45526	-0.434077	0.781693	-0.555304	0.578687	0.839022
YDR524C	68.6564	0.08071	0.282903	0.285293	0.77542	0.931319
YDR524C-B	2522.98	-0.272426	0.215213	-1.26584	0.205569	0.540091
YDR525W-A	19.1836	-0.883247	0.473353	-1.86594	0.0620502	0.285891
YDR527W	128.344	0.48269	0.241616	1.99775	0.0457435	0.243724
YDR528W	54.4505	-0.626042	0.306273	-2.04407	0.0409469	0.230273
YDR529C	919.936	-0.549438	0.228781	-2.40159	0.016324	0.129501
YBL064C	292.252	-1.27537	0.28689	-4.44551	8.76849e-06	0.000383871
YDR530C	126.775	-0.45757	0.280586	-1.63077	0.10294	0.375058
YDR531W	55.2539	-0.432522	0.307195	-1.40797	0.159139	0.473005
YDR532C	35.2034	0.232889	0.337358	0.690332	0.489985	0.794543
YDR533C	28.0101	-0.513514	0.399829	-1.28433	0.199025	0.529772
YDR534C	22.1167	0.51004	0.413404	1.23375	0.217294	0.555689
YDR536W	7.63971	-1.59867	0.798733	-2.00151	0.0453377	0.242547
YDR538W	28.9559	-0.715917	0.375115	-1.90853	0.0563231	0.273112
YDR539W	86.1791	-0.321761	0.280362	-1.14766	0.251108	0.587453
YDR540C	3.92595	0.0891401	0.874659	0.101914	0.918825	0.975677
YDR541C	23.3176	-0.0492862	0.395757	-0.124536	0.900891	0.969921
YBL063W	43.376	0.166524	0.307651	0.541277	0.588317	0.84444
YDR545W	8.45085	6.56843	1.28739	5.10213	3.35855e-07	2.34156e-05
YEL077C	141.439	0.655839	0.271405	2.41646	0.0156724	0.126019
YEL076C-A	5.15952	1.39051	0.83894	1.65746	0.0974273	0.365001
YEL076C	3.92356	1.58761	0.973704	1.63049	0.102998	0.375058
YEL075C	0.980801	-2.12797	1.91151	-1.11324	0.265606	0.604246
YEL073C	12.0195	0.448961	0.568153	0.790211	0.429405	0.747308
YEL072W	17.2535	-0.246797	0.454486	-0.543025	0.587113	0.844039
YEL071W	159.707	-0.957619	0.605128	-1.58251	0.113534	0.393616
YEL070W	46.8746	-0.949075	0.723329	-1.31209	0.189489	0.518082
YAL055W	62.9562	-0.0168877	0.280516	-0.0602021	0.951995	0.984099
YBL061C	75.3753	0.562904	0.26444	2.12866	0.0332822	0.201562
YEL069C	0.68334	-1.50503	2.14854	-0.700488	0.483622	0.790211
YEL068C	60.1098	-0.0845947	0.28651	-0.295259	0.767796	0.927009
YEL067C	16.5344	1.29586	0.479438	2.70287	0.00687439	0.0756516
YEL066W	35.4018	0.314217	0.33622	0.934559	0.350016	0.687138
YEL065W	297.147	1.40248	0.22972	6.10519	1.02676e-09	1.72647e-07
YEL064C	30.6552	-0.43213	0.369878	-1.1683	0.242684	0.58027
YEL063C	147.642	-0.142869	0.21469	-0.665464	0.505754	0.801202
YEL062W	31.5742	-0.27837	0.362822	-0.767234	0.442942	0.758174
YEL061C	90.1768	0.518408	0.257681	2.01182	0.0442384	0.238586
YEL060C	491.323	0.18486	0.207237	0.892025	0.37238	0.707424
YBL060W	47.5974	0.368174	0.307769	1.19627	0.231592	0.570835
YEL059C-A	30.6926	-0.0900187	0.356115	-0.25278	0.800439	0.940479
YEL058W	173.501	0.0819434	0.206668	0.396499	0.691737	0.898538
YEL057C	102.916	-0.626466	0.294505	-2.12718	0.0334049	0.201877
YEL056W	118.478	-0.238602	0.236445	-1.00912	0.312916	0.651946
YEL055C	118.487	0.318245	0.276733	1.15001	0.250141	0.586804
YEL054C	994.623	-0.208905	0.208891	-1.00007	0.317276	0.656908
YEL053C	91.2698	-0.0752867	0.241114	-0.312245	0.754854	0.920738
YEL052W	162.057	-0.538658	0.217053	-2.48169	0.0130759	0.114831
YEL051W	584.429	-0.096858	0.192633	-0.50281	0.615098	0.859998
YBL059C-A	122.761	-0.256469	0.241922	-1.06013	0.289086	0.628654
YEL050C	116.049	-0.0652823	0.232801	-0.28042	0.779155	0.931377
YEL049W	1.20682	1.42207	1.69892	0.837043	0.402568	0.730846
YEL048C	8.42857	0.273946	0.616082	0.444659	0.656566	0.879885
YEL047C	154.425	-0.237369	0.236783	-1.00248	0.316114	0.655741
YEL046C	429.374	-0.215717	0.246538	-0.874982	0.381584	0.71619
YEL044W	69.0754	0.339645	0.28369	1.19724	0.231213	0.570835
YEL043W	154.451	0.0260807	0.23117	0.112821	0.910173	0.972226
YBL059W	60.3919	-0.140405	0.311737	-0.450395	0.652426	0.878455
YEL042W	327.642	0.239864	0.190786	1.25724	0.208666	0.544196
YEL041W	22.622	0.246509	0.408166	0.603942	0.545882	0.82368
YEL040W	528.004	0.43055	0.2025	2.12617	0.0334887	0.202143
YEL039C	70.9	-1.46614	0.378283	-3.87577	0.000106289	0.00304625
YEL038W	76.8351	-0.107996	0.26281	-0.410927	0.681126	0.892914
YEL037C	242.679	0.160188	0.209383	0.76505	0.444242	0.759415
YEL036C	213.926	0.4084	0.21546	1.89548	0.0580283	0.277381
YEL034W	1667.24	-0.320906	0.218057	-1.47166	0.141112	0.443652
YEL033W	87.2995	-0.648387	0.25474	-2.54529	0.0109188	0.1015
YBL058W	364.09	-0.17032	0.190652	-0.893356	0.371667	0.707094
YEL032W	121.436	-0.477989	0.272815	-1.75206	0.0797628	0.327695
YEL031W	330.608	-0.0522674	0.251517	-0.207809	0.835378	0.95017
YEL030W	29.3519	0.536465	0.367076	1.46145	0.143891	0.447809
YEL029C	21.1212	-0.521595	0.416992	-1.25085	0.210988	0.546791
YEL027W	422.853	-0.444821	0.239001	-1.86117	0.0627205	0.287756
YEL026W	378.562	-0.139461	0.207459	-0.672235	0.501434	0.79887
YEL025C	63.9415	-0.404297	0.275625	-1.46684	0.142421	0.445415
YEL024W	190.435	-0.677883	0.251561	-2.69471	0.00704509	0.0764265
YBL057C	151.946	0.30166	0.239261	1.2608	0.207381	0.542856
YEL023C	27.9448	0.029909	0.370058	0.0808225	0.935583	0.981198
YEL022W	160.851	-0.104462	0.266857	-0.391453	0.695463	0.898538
YEL021W	146.693	-0.112789	0.251119	-0.449146	0.653327	0.878633
YEL020W-A	140.012	-0.283441	0.226114	-1.25353	0.210014	0.545798
YEL020C	40.7054	0.0659192	0.311558	0.21158	0.832435	0.950126
YEL019C	12.5953	0.150426	0.520056	0.289248	0.772391	0.929438
YEL018W	72.6449	0.449416	0.272642	1.64838	0.0992756	0.368384
YEL017C-A	119.287	-0.418823	0.252269	-1.66022	0.0968694	0.363388
YEL017W	106.066	-0.371184	0.265964	-1.39562	0.162829	0.479595
YBL056W	283.87	-0.153868	0.190733	-0.806718	0.419829	0.741461
YEL016C	78.3963	-0.186618	0.270624	-0.689582	0.490457	0.794543
YEL015W	213.991	0.0359325	0.201571	0.178262	0.858517	0.955903
YEL013W	103.816	-0.464817	0.250766	-1.85359	0.0637984	0.289648
YEL012W	88.3671	0.291556	0.269447	1.08205	0.27923	0.618742
YEL011W	457.177	-1.72112	0.207183	-8.30727	9.79325e-17	2.6661e-14
YEL009C	1096.04	0.109257	0.187522	0.582634	0.56014	0.830908
YEL007W	195.84	-0.37609	0.248627	-1.51267	0.130363	0.424181
YBL055C	47.8741	0.503448	0.304374	1.65404	0.0981184	0.36639
YEL006W	54.8849	-0.184534	0.306019	-0.603016	0.546498	0.823927
YEL005C	45.4365	-0.347925	0.3183	-1.09307	0.274363	0.613644
YEL004W	21.227	-0.548514	0.407872	-1.34482	0.178683	0.503466
YEL003W	162.207	0.15258	0.222817	0.68478	0.493483	0.796004
YEL002C	351.163	-0.38016	0.205769	-1.84751	0.0646738	0.291593
YEL001C	289.206	-0.12202	0.241781	-0.504672	0.613789	0.859851
YER001W	142.874	-0.0180979	0.241076	-0.0750713	0.940158	0.982575
YER002W	136.013	0.60906	0.270811	2.24902	0.0245112	0.166426
YER003C	310.625	-0.338395	0.206321	-1.64014	0.100976	0.371002
YER004W	164.676	-0.143925	0.225675	-0.637755	0.523633	0.81059
YBL054W	79.7381	0.82931	0.292886	2.83151	0.00463282	0.0584677
YER005W	57.9862	-0.0821912	0.277576	-0.296103	0.767151	0.927009
YER006W	354.912	0.495752	0.251002	1.97509	0.0482576	0.250509
YER007W	9.75666	0.124633	0.615287	0.202562	0.839478	0.95017
YER007C-A	119.113	-0.125333	0.225765	-0.555147	0.578794	0.839022
YER008C	119.307	-0.11068	0.259017	-0.427307	0.669156	0.88739
YER009W	262.579	-0.326409	0.233998	-1.39492	0.16304	0.47997
YER010C	94.1034	-0.415699	0.263263	-1.57903	0.11433	0.394603
YER011W	189.789	-1.05253	0.763619	-1.37835	0.168095	0.487618
YBL052C	169.99	0.470111	0.211712	2.22052	0.0263833	0.173771
YER012W	322.579	-0.136655	0.217257	-0.629003	0.529347	0.81483
YER013W	29.4453	0.339244	0.358393	0.946568	0.343859	0.680928
YER014W	50.9455	-0.0521781	0.299331	-0.174316	0.861617	0.957429
YER015W	35.0773	0.148245	0.393166	0.377054	0.706133	0.903527
YER016W	108.882	0.586742	0.238031	2.46498	0.0137022	0.117093
YER017C	157.166	-0.102869	0.241963	-0.425145	0.670731	0.888043
YER018C	42.051	0.194613	0.316995	0.61393	0.539261	0.819499
YER019W	68.1082	-0.12184	0.289426	-0.42097	0.673777	0.889382
YER019C-A	394.181	-0.142056	0.226517	-0.627132	0.530573	0.815552
YAL054C	22.1123	0.355229	0.43682	0.813217	0.416094	0.739449
YBL051C	238.811	0.34156	0.222545	1.53479	0.124836	0.414356
YER020W	137.912	0.0904196	0.248427	0.363969	0.715881	0.906944
YER021W	311.29	-0.0633881	0.214638	-0.295325	0.767745	0.927009
YER022W	76.5019	0.152542	0.265773	0.573956	0.565998	0.834671
YER023W	432.262	-0.0274923	0.20801	-0.132168	0.894851	0.968667
YER024W	38.7747	-0.401433	0.322142	-1.24613	0.212715	0.549025
YER025W	623.867	0.0273293	0.244981	0.111557	0.911175	0.972226
YER026C	257.259	0.737124	0.209407	3.52006	0.000431447	0.00986632
YER027C	230.417	-0.0508261	0.234645	-0.216609	0.828513	0.950126
YER028C	5.17452	0.41793	0.794572	0.525981	0.598901	0.852309
YBL050W	154.177	-0.137224	0.237613	-0.57751	0.563595	0.834072
YER029C	82.2773	0.788979	0.285059	2.76777	0.00564413	0.0676468
YER030W	353.604	0.207562	0.252943	0.82059	0.41188	0.737462
YER031C	309.653	0.089044	0.211756	0.420503	0.674118	0.889438
YER032W	117.093	0.102073	0.235597	0.433254	0.66483	0.884738
YER033C	34.8595	-0.409588	0.340694	-1.20222	0.229279	0.568426
YER034W	30.2264	0.699802	0.364187	1.92154	0.0546633	0.268249
YER035W	63.7932	-0.483227	0.309361	-1.56202	0.118284	0.402517
YER036C	558.112	-0.146283	0.18524	-0.789692	0.429708	0.747608
YER037W	62.5762	0.210786	0.299237	0.704413	0.481175	0.788166
YER038C	14.266	0.395788	0.478291	0.827504	0.407951	0.733876
YBL049W	7.05347	0.156596	0.681676	0.229722	0.818308	0.945798
YER038W-A	1.54439	1.09545	1.41027	0.776767	0.437296	0.753869
YER039C	5.86702	-0.407415	0.718111	-0.567342	0.570482	0.836677
YER039C-A	4.36806	-1.37915	0.918176	-1.50206	0.133082	0.429846
YER040W	57.9349	0.207878	0.299748	0.69351	0.487989	0.793283
YER041W	47.3535	-0.305736	0.316354	-0.966435	0.333827	0.671217
YER042W	57.2322	0.770904	0.314776	2.44905	0.0143233	0.119569
YER043C	1335.64	0.543365	0.210968	2.57558	0.0100072	0.0958312
YER044C	81.1677	0.390779	0.321823	1.21427	0.224645	0.563278
YER044C-A	1.36616	1.61405	1.57869	1.0224	0.306592	0.644407
YER045C	43.3256	0.577175	0.332788	1.73436	0.0828543	0.334041
YBL047C	371.982	-0.194186	0.217782	-0.891652	0.37258	0.707424
YER046W	39.9238	-0.342286	0.362391	-0.944521	0.344904	0.681629
YER047C	85.0891	0.235363	0.267292	0.880546	0.378563	0.713007
YER048C	279.568	0.0808347	0.192597	0.419709	0.674698	0.889792
YER048W-A	129.282	-0.339503	0.245404	-1.38344	0.166529	0.48475
YER049W	118.032	-0.00203307	0.22832	-0.00890446	0.992895	0.998239
YER050C	155.544	-0.227256	0.230593	-0.985526	0.324366	0.663644
YER051W	38.9012	0.181057	0.343331	0.527353	0.597948	0.851849
YER052C	97.8254	-0.338701	0.249772	-1.35604	0.175086	0.497498
YER053C	154.287	-2.27007	0.293186	-7.74276	9.72806e-15	2.3173e-12
YBL046W	71.3409	0.819728	0.289499	2.83153	0.00463252	0.0584677
YER053C-A	4.99245	-3.16175	1.0766	-2.93681	0.00331612	0.0459038
YER054C	90.8894	-1.21877	0.274696	-4.43681	9.13002e-06	0.000395427
YER055C	232.271	0.0607499	0.212375	0.28605	0.774839	0.930872
YER056C	151.115	-0.515426	0.254594	-2.0245	0.0429187	0.235251
YER056C-A	1042.59	-0.214857	0.186395	-1.15269	0.249036	0.586654
YER057C	357.919	-0.0391937	0.235799	-0.166217	0.867987	0.959636
YER058W	56.6239	0.185618	0.301484	0.615682	0.538105	0.818394
YER059W	74.1984	0.0205973	0.256728	0.08023	0.936054	0.981198
YER060W	20.8818	-0.133022	0.406704	-0.327075	0.743611	0.915585
YER060W-A	3.59431	-0.31839	0.971704	-0.327662	0.743167	0.915271
YBL045C	712.715	-0.484884	0.21118	-2.29607	0.0216718	0.154294
YER061C	25.7816	0.249759	0.379102	0.658818	0.510012	0.802863
YER062C	131.991	-0.453299	0.240992	-1.88097	0.0599756	0.282651
YER063W	128.116	-0.213003	0.242744	-0.877478	0.380227	0.715052
YER064C	199.823	0.0461494	0.204816	0.225322	0.821729	0.947275
YER065C	54.6631	0.42835	0.302938	1.41399	0.157366	0.469797
YER066W	11.5377	-0.107357	0.549127	-0.195505	0.844998	0.953111
YER067W	1025.84	-1.42163	0.235821	-6.02842	1.65574e-09	2.62941e-07
YER068W	138.945	0.133278	0.222086	0.600117	0.548428	0.824445
YER069W	29.6739	-0.0987809	0.400271	-0.246785	0.805074	0.941145
YBL044W	0.914703	2.02873	1.96347	1.03324	0.301493	0.640271
YER070W	477.165	-0.0383831	0.247072	-0.155352	0.876544	0.962028
YER071C	27.2708	-0.0520885	0.365474	-0.142523	0.886667	0.966189
YER072W	1174.05	0.108931	0.216516	0.503109	0.614888	0.859998
YER073W	90.9546	-0.1103	0.256674	-0.429728	0.667394	0.886859
YER074W	891.127	-0.0696684	0.203807	-0.341835	0.732475	0.910918
YER074W-A	82.5491	-0.737822	0.276608	-2.66739	0.00764422	0.0803226
YER075C	55.9403	-0.693908	0.326421	-2.1258	0.0335196	0.202143
YER076C	18.2547	0.21688	0.447325	0.484838	0.627791	0.868902
YER077C	64.4695	0.469312	0.274537	1.70947	0.0873646	0.344695
YBL043W	18.8092	0.398874	0.460946	0.865339	0.386853	0.721659
YER078C	69.1597	0.0261112	0.263561	0.0990707	0.921082	0.9766
YER079W	77.8798	-0.966605	0.281593	-3.43263	0.00059775	0.0129425
YER080W	271.246	0.00801014	0.221619	0.0361438	0.971168	0.991807
YER081W	68.8405	0.22705	0.287123	0.790778	0.429073	0.746959
YER082C	112.528	0.863588	0.27676	3.12035	0.00180634	0.028846
YER083C	175.968	-0.0901323	0.224676	-0.401166	0.688298	0.898179
YER084W	8.35056	-0.352948	0.624812	-0.564886	0.572151	0.836753
YBL042C	66.6146	0.632533	0.269514	2.34694	0.0189281	0.142197
YER086W	263.182	-0.153082	0.207992	-0.735998	0.461732	0.773885
YER087W	40.4617	-0.0512616	0.31646	-0.161984	0.871318	0.960474
YER087C-B	170.21	-0.282171	0.228595	-1.23437	0.217065	0.555689
YER088C	333.046	-0.566642	0.208779	-2.71408	0.00664611	0.0746533
YER089C	311.433	-0.053129	0.213861	-0.248428	0.803803	0.941128
YER090W	166.406	-0.15553	0.234989	-0.661862	0.50806	0.802184
YER091C	277.481	0.393273	0.752883	0.522356	0.601423	0.85323
YER092W	59.8101	0.352175	0.287785	1.22374	0.221049	0.559225
YER093C	47.0646	-0.0124546	0.366272	-0.0340038	0.972874	0.992128
YER093C-A	38.6745	-0.312852	0.346024	-0.904133	0.365925	0.7006
YBL041W	263.336	0.196856	0.217617	0.9046	0.365677	0.7006
YER094C	331.571	0.00123009	0.197998	0.00621262	0.995043	0.998302
YER095W	111.683	0.219399	0.245297	0.894421	0.371096	0.706245
YER096W	3.45313	0.782896	0.935833	0.836577	0.402831	0.730846
YER098W	42.4476	-0.0862328	0.324753	-0.265533	0.790599	0.935933
YER099C	98.1691	-0.145624	0.257753	-0.564973	0.572092	0.836753
YER100W	140.506	-0.0614682	0.246607	-0.249256	0.803163	0.941128
YER101C	26.4796	-0.881923	0.380902	-2.31535	0.0205937	0.150039
YER102W	2665.8	-0.0514403	0.220804	-0.232969	0.815786	0.945308
YER103W	88.1477	-1.17346	0.690037	-1.70058	0.0890227	0.347138
YAL053W	126.62	0.225204	0.228073	0.987421	0.323436	0.662902
YBL040C	88.1169	-0.185114	0.277183	-0.667842	0.504234	0.801085
YER104W	28.0895	0.182538	0.373153	0.489176	0.624717	0.868135
YER105C	104.279	-0.214945	0.26649	-0.806575	0.419911	0.741461
YER107C	68.0309	0.205808	0.306211	0.672113	0.501512	0.79887
YER109C	39.208	0.414579	0.37159	1.11569	0.264555	0.603537
YER110C	389.792	0.12659	0.233194	0.542854	0.58723	0.844039
YER111C	56.3827	-0.208548	0.313173	-0.665921	0.505462	0.801202
YER112W	126.734	0.112131	0.248822	0.450649	0.652243	0.878415
YER113C	75.031	-0.141546	0.268153	-0.527855	0.5976	0.851565
YER114C	141.495	0.329954	0.26396	1.25001	0.211294	0.547087
YBL039W-B	13.4296	-0.654213	0.568274	-1.15123	0.249638	0.586654
YER115C	23.0678	-0.453349	0.396166	-1.14434	0.252482	0.589159
YER116C	73.0311	0.410059	0.291821	1.40517	0.15997	0.474597
YER117W	669.026	-0.369735	0.211175	-1.75085	0.0799713	0.327739
YER118C	170.172	0.145814	0.218793	0.666444	0.505128	0.801085
YER119C	67.5097	-0.37685	0.281585	-1.33832	0.180793	0.506664
YER120W	485.473	-0.395743	0.20027	-1.97605	0.0481491	0.250509
YER121W	15.5598	-0.341722	0.459983	-0.742902	0.457541	0.770805
YER122C	394.817	-0.0615707	0.204137	-0.301615	0.762946	0.924313
YER123W	112.05	-0.164956	0.232777	-0.708643	0.478546	0.785938
YER124C	200.658	-0.66179	0.202865	-3.26222	0.00110544	0.020653
YBL039C	213.623	0.427665	0.229236	1.86561	0.0620958	0.285891
YER125W	173.594	-0.504998	0.240009	-2.10408	0.0353715	0.209771
YER126C	334.546	0.437676	0.213859	2.04656	0.0407012	0.229476
YER127W	130.234	0.761457	0.239235	3.18288	0.00145816	0.024959
YER128W	20.7201	0.085731	0.418137	0.205031	0.837548	0.95017
YER129W	132.62	0.0552768	0.22352	0.247302	0.804675	0.941128
YER130C	60.2898	0.608237	0.302388	2.01144	0.0442785	0.238586
YER131W	1308.44	-0.127388	0.186119	-0.684448	0.493692	0.796004
YER132C	71.792	0.35278	0.271626	1.29877	0.194023	0.525396
YBL038W	95.1273	-0.127178	0.271619	-0.468222	0.639626	0.87304
YER133W	378.145	-0.171064	0.213796	-0.800128	0.423637	0.744275
YER134C	77.9018	-0.545046	0.286066	-1.90531	0.0567393	0.273968
YER136W	303.964	-0.109505	0.202918	-0.539649	0.589439	0.845839
YER137C	18.7671	0.243066	0.437869	0.555112	0.578818	0.839022
YER138C	250.472	1.3997	0.273885	5.11054	3.21237e-07	2.29564e-05
YBL037W	86.1192	-0.0155103	0.268455	-0.0577761	0.953927	0.984808
YER137C-A	81.9281	1.46991	0.310733	4.73045	2.24018e-06	0.000123145
YER138W-A	34.9596	-0.494254	0.432517	-1.14274	0.253147	0.590149
YER139C	30.9776	-0.0672831	0.3791	-0.177481	0.859131	0.956132
YER140W	50.0074	-0.0456595	0.291489	-0.156642	0.875527	0.961731
YER141W	167.32	-1.0199	0.264522	-3.85564	0.000115428	0.00326684
YER142C	31.8576	-0.212618	0.344233	-0.617655	0.536803	0.818245
YER143W	93.3611	0.030218	0.248249	0.121725	0.903117	0.969923
YER144C	59.6618	-0.0626606	0.277313	-0.225957	0.821235	0.947275
YER145C	955.318	0.2046	0.504026	0.405931	0.684794	0.895792
YER146W	153.517	0.185622	0.230582	0.805014	0.420812	0.742058
YBL036C	107.864	0.112317	0.255267	0.439998	0.659939	0.882082
YER147C	50.7904	0.186598	0.29835	0.625435	0.531685	0.816288
YER148W	147.861	0.0156218	0.231082	0.0676027	0.946102	0.983031
YER149C	57.2409	0.0338045	0.29622	0.114119	0.909143	0.972054
YER150W	87.9731	-3.64882	0.818725	-4.45671	8.3228e-06	0.00037173
YER151C	160.352	0.386302	0.225771	1.71104	0.0870746	0.343788
YER152C	72.8001	0.206541	0.294862	0.700466	0.483636	0.790211
YER153C	15.9877	0.425021	0.491128	0.865398	0.38682	0.721659
YER154W	102.433	0.349221	0.240015	1.45499	0.145671	0.451588
YER155C	152.526	-0.140323	0.253161	-0.554285	0.579384	0.83948
YBL035C	52.6539	0.191765	0.299398	0.640502	0.521846	0.809801
YER156C	292.676	-0.0369876	0.221316	-0.167126	0.867271	0.959391
YER157W	48.2159	-0.436858	0.300903	-1.45182	0.146551	0.452393
YER158C	52.3136	-0.664742	0.329444	-2.01777	0.0436156	0.237784
YER159C	247.36	0.438837	0.214173	2.04899	0.0404636	0.228813
YER160C	593.17	1.16116	0.238389	4.87088	1.11103e-06	6.78369e-05
YER159C-A	18.1778	1.07912	0.46446	2.32338	0.0201587	0.147943
YER161C	171.627	0.800452	0.219905	3.63998	0.000272655	0.00670108
YER162C	40.6229	0.324403	0.315063	1.02965	0.303177	0.642078
YBL034C	30.3729	0.323608	0.381432	0.848401	0.396215	0.726777
YER163C	60.8842	0.0695485	0.28069	0.247777	0.804307	0.941128
YER164W	141.673	0.254424	0.288986	0.880404	0.378641	0.713007
YER165W	922.842	0.0716333	0.226131	0.316778	0.751412	0.919475
YER166W	185.877	-0.0200896	0.213714	-0.0940025	0.925107	0.978447
YER167W	100.057	-0.105843	0.259378	-0.408064	0.683227	0.894642
YER168C	65.4862	0.201725	0.277354	0.727317	0.467032	0.776969
YER169W	67.5312	-0.00181917	0.268039	-0.00678697	0.994585	0.998302
YER170W	50.566	-0.0186015	0.291435	-0.0638272	0.949108	0.984099
YER171W	100.653	-0.0182566	0.260401	-0.0701097	0.944106	0.982579
YER172C	77.4696	-0.245836	0.292966	-0.839126	0.401399	0.730846
YBL033C	108.777	0.77304	0.237487	3.25508	0.00113361	0.0209736
YER173W	43.6719	-0.0263107	0.307873	-0.0854595	0.931896	0.979888
YER174C	58.2533	-0.718507	0.290428	-2.47396	0.0133624	0.116084
YER175C	55.068	-0.501856	0.336621	-1.49086	0.135997	0.437281
YER176W	81.1068	0.647237	0.281809	2.29672	0.0216346	0.154221
YER177W	4295.35	-0.787108	0.20189	-3.8987	9.67103e-05	0.00286244
YER178W	818.027	-0.392981	0.189783	-2.07069	0.0383878	0.222255
YER179W	2.83362	-1.26532	1.08429	-1.16696	0.243225	0.580508
YER180C	26.2949	-0.12928	0.375772	-0.344039	0.730817	0.910631
YER180C-A	15.1355	-0.0582853	0.466465	-0.124951	0.900562	0.969921
YBL032W	487.086	0.0509648	0.195883	0.260179	0.794725	0.938735
YER182W	48.6475	-0.543026	0.325713	-1.66719	0.0954759	0.361003
YER183C	41.7748	0.00294967	0.312818	0.00942937	0.992477	0.998063
YER184C	11.4586	0.0774761	0.552313	0.140276	0.888442	0.966269
YER185W	2.91938	0.390965	1.01366	0.385696	0.699722	0.899755
YER186C	74.6148	0.0729557	0.275075	0.265221	0.790839	0.935933
YER187W	6.77091	0.411656	0.689763	0.596808	0.550636	0.826026
YER188C-A	5.97434	-0.424195	0.717767	-0.590993	0.554525	0.829252
YER189W	3.98813	0.942653	0.932522	1.01086	0.312082	0.650919
YER190W	28.9154	0.757887	0.385593	1.96551	0.0493551	0.254
YAL051W	48.2094	-0.261291	0.296133	-0.882345	0.377591	0.711967
YBL031W	55.3594	0.0582187	0.29543	0.197064	0.843777	0.952958
YFL066C	26.0828	0.277217	0.414103	0.66944	0.503215	0.800022
YFL065C	8.94072	0.197476	0.618567	0.319247	0.749539	0.919475
YFL064C	6.50214	0.00287606	0.712486	0.00403665	0.996779	0.998854
YFL062W	35.7302	-0.331712	0.357824	-0.927026	0.353913	0.690789
YFL061W	1.25065	-1.57848	1.66093	-0.950361	0.341929	0.67946
YFL060C	26.9319	0.15519	0.3811	0.407215	0.68385	0.895054
YFL059W	50.4241	-0.577766	0.307263	-1.88037	0.0600582	0.282651
YBL030C	1426.36	-0.398979	0.199557	-1.99932	0.0455733	0.243271
YFL058W	1.66248	0.598998	1.32384	0.452472	0.650929	0.877473
YFL056C	23.6311	-0.324945	0.391102	-0.830845	0.406061	0.733643
YFL055W	8.3229	0.707095	0.64963	1.08846	0.276393	0.615319
YFL054C	35.6929	0.897518	0.347477	2.58295	0.00979585	0.0941224
YFL052W	25.0346	0.740539	0.403754	1.83414	0.0666339	0.29715
YFL050C	23.4694	-0.62557	0.396516	-1.57766	0.114643	0.395064
YFL049W	79.2527	0.234907	0.258377	0.909162	0.363265	0.698917
YFL048C	144.95	0.0997818	0.224772	0.443925	0.657097	0.880183
YBL029C-A	20.532	-0.696385	0.46145	-1.50912	0.131268	0.426154
YFL047W	99.0118	0.024495	0.260064	0.0941886	0.924959	0.978447
YFL046W	107.481	0.0448936	0.242454	0.185164	0.853101	0.955856
YFL045C	657.946	-0.180234	0.205952	-0.875123	0.381507	0.71619
YFL044C	82.2584	-0.236268	0.255194	-0.925834	0.354532	0.691671
YFL042C	115.542	0.070899	0.23962	0.29588	0.767321	0.927009
YFL041W-A	2.96865	-0.552964	1.03929	-0.53206	0.594684	0.849952
YFL041W	120.285	0.0198989	0.256001	0.0777298	0.938043	0.981657
YFL039C	2068.3	-0.224146	0.203976	-1.09888	0.271819	0.610364
YFL038C	1148.79	-0.120333	0.210667	-0.571199	0.567865	0.835431
YBL029W	9.65894	-0.846105	0.654217	-1.29331	0.195904	0.527388
YFL037W	613.787	-0.045032	0.194912	-0.231038	0.817285	0.945479
YFL036W	111.363	-0.330822	0.25432	-1.30081	0.193324	0.524925
YFL034C-B	53.4656	-0.0179304	0.299457	-0.0598763	0.952254	0.984099
YFL034C-A	124.619	-0.348885	0.254485	-1.37094	0.170392	0.49149
YFL034W	69.5361	0.184752	0.297343	0.621342	0.534375	0.817474
YFL033C	112.989	-0.362247	0.246064	-1.47216	0.140977	0.443568
YFL031W	977.865	0.107026	0.201371	0.531488	0.595081	0.850094
YFL030W	34.6021	-0.513304	0.348517	-1.47282	0.140799	0.443568
YFL029C	50.9305	0.222137	0.325984	0.681436	0.495596	0.796004
YBL028C	197.777	0.321171	0.266595	1.20472	0.228312	0.567312
YFL028C	73.315	0.0675176	0.272036	0.248194	0.803984	0.941128
YFL027C	52.3664	-0.0872942	0.295018	-0.295894	0.767311	0.927009
YFL026W	697.161	-1.14695	0.233411	-4.91385	8.93036e-07	5.63017e-05
YFL025C	38.2649	0.160294	0.34789	0.46076	0.644971	0.876385
YFL024C	78.8278	0.232854	0.262041	0.888618	0.374208	0.708387
YFL023W	85.1272	1.00239	0.273473	3.6654	0.000246955	0.00621957
YFL022C	312.502	-0.210559	0.215618	-0.976536	0.328799	0.665631
YFL021W	76.3171	0.685363	0.302721	2.26401	0.0235734	0.162177
YFL020C	3.43013	1.27097	0.979357	1.29776	0.19437	0.525396
YBL027W	3626.63	-0.000409331	0.208459	-0.00196361	0.998433	0.999051
YFL018C	876.315	0.0145463	0.190538	0.076343	0.939146	0.982452
YFL017W-A	39.8379	0.293261	0.347938	0.842855	0.39931	0.729346
YFL017C	73.243	0.318605	0.266265	1.19657	0.231474	0.570835
YFL016C	186.302	0.106926	0.213087	0.501797	0.61581	0.860359
YFL014W	93.7596	-6.24524	1.30976	-4.76823	1.85854e-06	0.000106253
YFL013C	141.07	0.375816	0.238738	1.57418	0.115445	0.396397
YFL012W	0.950131	-2.10061	1.86438	-1.12671	0.259866	0.597368
YFL011W	15.7888	0.93188	0.567828	1.64113	0.10077	0.370971
YFL010C	237.191	0.12338	0.225542	0.547037	0.584353	0.843836
YBL026W	103.978	-0.0759868	0.243201	-0.312444	0.754703	0.920738
YFL009W	62.1389	-0.539724	0.289388	-1.86505	0.0621741	0.285961
YFL008W	90.1947	0.522816	0.254602	2.05347	0.0400274	0.227372
YFL007W	178.532	-0.090859	0.257405	-0.352981	0.724103	0.910361
YFL005W	343.077	-0.10045	0.215032	-0.46714	0.6404	0.873578
YFL004W	261.451	0.0952951	0.243364	0.391574	0.695373	0.898538
YFL003C	2.86111	-0.508008	1.10619	-0.459241	0.646061	0.876385
YFL002W-A	78.8012	0.27905	0.267699	1.0424	0.297226	0.637449
YFL002W-B	39.8406	0.567096	0.328873	1.72436	0.0846422	0.33934
YBL025W	25.2523	0.00264825	0.373878	0.00708317	0.994348	0.998302
YFL002C	109.925	0.414918	0.252546	1.64294	0.100395	0.370297
YFL001W	79.244	0.184212	0.290902	0.633245	0.526574	0.812749
YFR001W	182.586	0.612134	0.235141	2.60327	0.00923405	0.0902804
YFR002W	106.047	-0.0857935	0.278546	-0.308005	0.758079	0.922465
YFR003C	169.883	-0.212007	0.245843	-0.862364	0.388487	0.721774
YFR004W	234.896	0.220945	0.200341	1.10284	0.270095	0.608393
YFR005C	48.6826	-0.734202	0.2998	-2.44897	0.0143266	0.119569
YFR006W	286.067	-0.624977	0.198517	-3.14823	0.00164261	0.0268309
YFR007W	36.2814	-0.650479	0.336521	-1.93295	0.0532425	0.262592
YBL024W	168.013	0.0146731	0.239361	0.0613013	0.951119	0.984099
YFR008W	35.6611	0.11733	0.325947	0.359968	0.718871	0.907542
YFR009W	318.427	0.145731	0.217349	0.670495	0.502543	0.799774
YFR010W	169.627	-0.320003	0.226058	-1.41558	0.156898	0.469216
YFR011C	135.934	0.0870297	0.237991	0.365684	0.714601	0.906901
YFR012W	1.61746	-0.524613	1.33262	-0.39367	0.693824	0.898538
YFR013W	132.324	-0.133188	0.219308	-0.60731	0.543645	0.822445
YFR014C	203.076	-0.402447	0.227326	-1.77035	0.0766691	0.320642
YBL023C	91.0705	0.072317	0.296589	0.243829	0.807363	0.941455
YFR015C	795.736	-0.993751	0.204051	-4.87011	1.11539e-06	6.78369e-05
YFR016C	167.311	0.183293	0.231499	0.791766	0.428497	0.746467
YFR017C	258.609	-1.35972	0.265302	-5.12518	2.97246e-07	2.23143e-05
YFR018C	111.37	0.42282	0.25969	1.62817	0.103488	0.376038
YFR019W	68.537	0.137661	0.279992	0.491661	0.622959	0.866405
YFR020W	22.9458	-0.986584	0.41726	-2.36443	0.0180578	0.13779
YFR021W	47.6381	-0.191523	0.304191	-0.629614	0.528947	0.814553
YFR022W	34.1586	-0.172543	0.340946	-0.506071	0.612806	0.859162
YAL049C	97.9798	-0.00391874	0.236716	-0.0165546	0.986792	0.996026
YBL022C	195.409	-0.00438452	0.270698	-0.0161971	0.987077	0.996107
YFR024C-A	273.921	-0.100776	0.211655	-0.47613	0.633982	0.870877
YFR025C	158.612	-0.219571	0.223944	-0.98047	0.326854	0.66495
YFR026C	10.1261	0.900749	0.566608	1.58972	0.111897	0.390071
YFR027W	20.2579	0.227516	0.418861	0.543179	0.587007	0.844039
YFR028C	152.862	0.183214	0.240618	0.761432	0.446399	0.761128
YFR029W	59.5379	0.107416	0.292397	0.367362	0.713349	0.906472
YBL021C	74.5317	0.860532	0.263491	3.26589	0.00109121	0.0204539
YFR030W	96.2824	0.0268449	0.309333	0.086783	0.930844	0.979714
YFR031C	77.5768	0.433066	0.263273	1.64493	0.0999844	0.369875
YFR031C-A	2516.03	-0.257871	0.226448	-1.13876	0.254801	0.591914
YFR032C	0.999575	-2.15434	1.84717	-1.1663	0.243495	0.580508
YFR032C-A	735.505	-0.517002	0.195394	-2.64595	0.00814611	0.0833982
YFR032C-B	12.2081	0.601492	0.561466	1.07129	0.28404	0.623066
YFR033C	1201.1	-0.0681297	0.261444	-0.26059	0.794409	0.938735
YFR034C	83.9038	0.862255	0.278458	3.09654	0.00195794	0.0306672
YBL020W	88.7984	-0.326527	0.277527	-1.17656	0.239371	0.577663
YFR036W	61.4287	-0.23961	0.311065	-0.770289	0.441128	0.757032
YFR037C	457.569	0.533452	0.197674	2.69864	0.00696239	0.0760822
YFR038W	59.5896	0.167626	0.314711	0.532633	0.594288	0.849918
YFR039C	89.069	0.236068	0.244962	0.963693	0.3352	0.6724
YFR040W	152.391	0.227284	0.2828	0.803691	0.421576	0.742498
YFR041C	57.3015	0.511208	0.297869	1.71622	0.0861224	0.341444
YFR042W	35.0802	-0.458788	0.378146	-1.21326	0.225031	0.563515
YFR043C	24.8072	0.0469553	0.381603	0.123048	0.902069	0.969921
YFR044C	557.988	-0.433119	0.189609	-2.28428	0.0223551	0.156431
YBL019W	21.4821	-0.0174103	0.415454	-0.0419068	0.966573	0.989206
YFR045W	39.1438	-0.526897	0.346987	-1.51849	0.128891	0.422712
YFR046C	60.8597	0.499022	0.275523	1.81118	0.0701129	0.30569
YFR047C	134.644	-0.54409	0.27097	-2.00794	0.0446499	0.240135
YFR048W	51.9519	-0.0809224	0.305182	-0.265161	0.790886	0.935933
YFR049W	87.7614	-0.257509	0.273606	-0.941165	0.34662	0.68294
YFR050C	283.596	-0.0920071	0.197811	-0.465125	0.641842	0.874895
YFR051C	397.797	-0.156034	0.189176	-0.82481	0.409479	0.735237
YFR052W	205.227	-0.275376	0.218534	-1.2601	0.207632	0.543015
YFR053C	7377.16	-0.413843	0.220184	-1.87953	0.0601719	0.282651
YFR055W	23.5534	0.0992954	0.411444	0.241334	0.809296	0.942503
YBL018C	39.1303	0.719293	0.344046	2.09069	0.0365558	0.214349
YGL263W	3.27955	-1.52789	2.17568	-0.702258	0.482518	0.789061
YGL261C	1.68186	2.16665	1.55699	1.39156	0.164054	0.481962
YGL259W	2.76201	-0.820554	1.05734	-0.776058	0.437715	0.753897
YGL258W-A	1.48303	-0.275675	1.41236	-0.195188	0.845246	0.953111
YGL258W	1.14649	0.451863	1.66109	0.272028	0.785601	0.933011
YGL257C	74.1265	-0.0501584	0.266372	-0.188302	0.85064	0.955125
YGL256W	66.2726	-0.161191	0.274762	-0.586655	0.557435	0.830321
YBL017C	259.952	-0.351348	0.201337	-1.74508	0.0809711	0.329006
YGL255W	46.2296	0.972982	0.311953	3.11901	0.00181463	0.0288975
YGL254W	41.7867	0.209669	0.320711	0.653763	0.513264	0.804588
YGL253W	1798.41	0.485698	0.259028	1.87508	0.0607816	0.283664
YGL252C	152.906	0.184777	0.231919	0.796732	0.425607	0.745171
YGL251C	22.0258	-0.124746	0.405376	-0.307728	0.758289	0.922465
YGL250W	34.9551	-0.42554	0.362618	-1.17352	0.240587	0.578465
YGL249W	2.75593	-0.717857	1.08179	-0.663583	0.506957	0.80218
YGL248W	92.8803	-0.194084	0.262782	-0.738573	0.460166	0.773074
YGL247W	21.3296	-0.170083	0.483181	-0.352007	0.724833	0.910361
YBL016W	129.53	-0.0357314	0.246353	-0.145041	0.884678	0.966189
YGL246C	67.4945	0.100895	0.265002	0.380733	0.703401	0.901954
YGL245W	1236.24	-0.156705	0.183441	-0.854252	0.392965	0.723968
YGL244W	295.348	0.447175	0.2104	2.12536	0.0335567	0.202153
YGL243W	37.1537	0.242219	0.330906	0.731988	0.464176	0.77548
YGL242C	90.2711	0.167337	0.279784	0.598092	0.549779	0.825173
YGL241W	44.1351	-0.10391	0.319405	-0.325323	0.744937	0.916315
YGL240W	6.22007	-0.2814	0.724022	-0.388662	0.697526	0.898548
YGL238W	126.229	-0.306931	0.253342	-1.21153	0.225694	0.564382
YGL237C	61.6885	0.022182	0.315252	0.0703628	0.943905	0.982575
YGL236C	69.0042	0.0482648	0.290915	0.165907	0.86823	0.959665
YBL015W	234.088	-1.19878	0.284302	-4.21658	2.48041e-05	0.000945365
YGL234W	221.092	0.0834124	0.231929	0.359646	0.719112	0.907542
YGL233W	103.837	-0.368308	0.269571	-1.36627	0.171853	0.493804
YGL232W	82.1034	-0.0261512	0.287921	-0.0908276	0.92763	0.979364
YGL231C	153.155	0.0200311	0.2299	0.0871296	0.930568	0.979714
YGL230C	1.09705	0.515722	1.66396	0.309937	0.756609	0.921593
YGL229C	33.4035	-0.462619	0.382815	-1.20847	0.226868	0.56613
YGL228W	288.294	0.21585	0.200125	1.07857	0.280778	0.620011
YGL227W	67.0378	0.156385	0.29482	0.530444	0.595804	0.850277
YGL226C-A	85.2585	-0.199791	0.262677	-0.760596	0.446898	0.761457
YGL226W	81.3741	0.314836	0.296122	1.0632	0.287692	0.626566
YGL225W	190.623	-0.451576	0.218927	-2.06268	0.039143	0.224679
YGL224C	93.9489	0.255713	0.254109	1.00631	0.314266	0.653316
YGL223C	80.9821	-0.354585	0.266635	-1.32985	0.183567	0.510686
YGL222C	80.1298	-0.512995	0.276861	-1.8529	0.0638967	0.289648
YGL221C	218.524	-0.117706	0.205964	-0.571487	0.567669	0.835358
YGL220W	152.257	-0.0550257	0.241258	-0.228078	0.819586	0.94658
YGL219C	149.671	-0.34323	0.238712	-1.43784	0.150479	0.459803
YGL216W	88.0713	0.0134681	0.254408	0.052939	0.957781	0.986423
YGL215W	227.972	0.0938336	0.210219	0.44636	0.655337	0.879283
YGL213C	96.5402	-0.275132	0.254649	-1.08043	0.279949	0.619616
YGL212W	40.3417	0.591971	0.324989	1.82151	0.0685292	0.302169
YGL211W	63.2119	0.296344	0.273077	1.08521	0.277831	0.617407
YGL210W	131.812	0.581529	0.243642	2.38682	0.0169948	0.132912
YGL209W	2.25116	-1.21675	1.24176	-0.979866	0.327152	0.66495
YGL208W	54.819	0.0787095	0.292194	0.269374	0.787642	0.934483
YGL207W	189.942	-0.0546567	0.255508	-0.213914	0.830614	0.950126
YGL206C	189.808	-0.551666	0.24935	-2.21241	0.0269381	0.176207
YGL205W	15.6507	2.01514	0.565668	3.5624	0.000367476	0.00868124
YAL067C	4.15737	1.08102	0.922672	1.17162	0.241351	0.578658
YAL048C	30.3415	-0.159959	0.357923	-0.446908	0.654942	0.879283
YBL014C	45.3966	0.161944	0.310174	0.522106	0.601597	0.85323
YGL204C	12.8253	-0.318907	0.562587	-0.566859	0.57081	0.836677
YGL203C	184.034	0.304714	0.237259	1.28431	0.199034	0.529772
YGL202W	405.067	-0.12948	0.199386	-0.649392	0.516085	0.806136
YGL201C	96.9387	0.205955	0.262803	0.783686	0.433225	0.750777
YGL200C	475.359	-0.0809221	0.212257	-0.381246	0.703021	0.901954
YGL198W	126.341	-0.651765	0.239441	-2.72202	0.00648833	0.0739566
YGL197W	127.374	-0.185201	0.247376	-0.748661	0.454062	0.767101
YBL013W	2.42731	0.297889	1.13308	0.262902	0.792626	0.937303
YGL196W	116.739	-0.776367	0.248	-3.13052	0.001745	0.0282611
YGL195W	234.694	-0.303507	0.218925	-1.38635	0.165639	0.483471
YGL194C-A	21.5336	-0.103802	0.436522	-0.237794	0.812041	0.944161
YGL194C	51.3324	-0.0340171	0.299862	-0.113442	0.90968	0.972226
YGL193C	18.6171	-0.391194	0.431219	-0.907182	0.364311	0.699854
YGL191W	229.154	-0.605549	0.22272	-2.71888	0.00655028	0.0741543
YGL190C	117.114	-0.16919	0.266063	-0.635903	0.52484	0.811826
YGL189C	2739.8	-0.214671	0.194659	-1.1028	0.270112	0.608393
YBL011W	123.002	-0.0393019	0.237441	-0.165523	0.868533	0.959683
YGL188C-A	27.8429	0.456283	0.395547	1.15355	0.248685	0.586522
YGL187C	219.762	-0.480939	0.223189	-2.15485	0.031174	0.193719
YGL186C	67.6451	-0.121167	0.271507	-0.446275	0.655399	0.879283
YGL185C	48.4457	-0.00347661	0.329389	-0.0105547	0.991579	0.997862
YGL184C	9.502	1.67281	0.656269	2.54897	0.0108043	0.100763
YGL183C	1.53742	0.468152	1.41708	0.330364	0.741125	0.914859
YGL181W	167.237	0.414433	0.213073	1.94503	0.051771	0.258679
YGL180W	25.4772	0.171155	0.403445	0.424234	0.671395	0.888158
YGL179C	32.7811	0.308381	0.35586	0.86658	0.386172	0.721486
YGL178W	61.4844	-0.336982	0.292652	-1.15148	0.249536	0.586654
YBL010C	44.7123	0.518537	0.304897	1.70069	0.0890003	0.347138
YGL176C	37.288	-0.085535	0.342662	-0.249619	0.802882	0.941128
YGL175C	24.4331	-0.26554	0.391732	-0.677862	0.497859	0.796898
YGL174W	53.879	0.308534	0.309343	0.997386	0.318577	0.657219
YGL173C	426.459	-0.0389653	0.208488	-0.186895	0.851743	0.955349
YGL172W	137.039	0.0391081	0.239869	0.16304	0.870487	0.960474
YGL171W	88.4033	0.606864	0.338743	1.79152	0.0732101	0.314457
YGL169W	60.522	0.168106	0.275688	0.609771	0.542014	0.820949
YGL168W	1.356	0.765283	1.49862	0.51066	0.609589	0.857784
YBL009W	64.6934	0.401254	0.285018	1.40782	0.159185	0.473005
YGL167C	204.313	0.0138624	0.224937	0.0616277	0.950859	0.984099
YGL166W	47.2814	0.506271	0.313482	1.61499	0.106312	0.382256
YGL164C	115.776	0.323323	0.265176	1.21928	0.22274	0.561884
YGL163C	49.1781	0.47398	0.320832	1.47735	0.139582	0.442407
YGL162W	27.6692	-0.515681	0.368904	-1.39787	0.162151	0.478414
YGL161C	199.165	-0.0878425	0.227487	-0.386143	0.699391	0.899734
YGL160W	84.5397	-0.132677	0.259889	-0.510514	0.609691	0.857784
YGL159W	25.5055	-0.521114	0.396208	-1.31526	0.188424	0.516444
YGL158W	1.53556	1.13782	1.46666	0.775792	0.437872	0.753897
YBL008W-A	2.80334	0.584711	1.01508	0.576021	0.564601	0.834671
YGL157W	3.72608	-0.59702	0.906226	-0.658798	0.510025	0.802863
YGL156W	52.3068	-0.40396	0.379865	-1.06343	0.287586	0.626566
YGL155W	95.5489	0.00452628	0.241914	0.0187102	0.985072	0.996026
YGL154C	17.484	-0.128984	0.474619	-0.271762	0.785805	0.933011
YGL153W	109.923	0.302417	0.245096	1.23387	0.217252	0.555689
YGL151W	68.6626	0.0396196	0.29037	0.136445	0.891469	0.967745
YGL150C	139.691	0.144315	0.262177	0.550447	0.582013	0.841732
YGL148W	626.118	0.120515	0.18275	0.659452	0.509605	0.802863
YGL147C	1474.61	-0.0493037	0.234703	-0.210068	0.833614	0.95017
YGL146C	45.0539	0.510413	0.310439	1.64417	0.100142	0.369875
YBL008W	42.4228	0.244269	0.322283	0.757933	0.448491	0.762195
YGL145W	59.3604	0.102114	0.280845	0.363594	0.716161	0.906944
YGL144C	28.4392	0.38829	0.368683	1.05318	0.292259	0.632233
YGL143C	58.9657	-0.115327	0.287917	-0.400556	0.688747	0.898179
YGL142C	66.4645	-0.439629	0.275958	-1.5931	0.111138	0.388722
YGL141W	53.7433	-0.667315	0.299918	-2.22499	0.0260819	0.172781
YGL140C	107.618	0.0811735	0.291318	0.278642	0.780519	0.931377
YGL139W	81.9645	0.102135	0.265897	0.384114	0.700894	0.900048
YGL137W	409.158	-0.117504	0.211213	-0.556331	0.577985	0.839022
YGL136C	34.162	-0.393089	0.337849	-1.1635	0.244625	0.581986
YBL007C	346.785	-0.078172	0.215867	-0.36213	0.717255	0.907
YGL135W	2056.39	-0.166283	0.213737	-0.777979	0.436581	0.753331
YGL134W	176.068	0.487005	0.209549	2.32406	0.0201225	0.147943
YGL133W	35.8396	0.323351	0.381964	0.846547	0.397248	0.727673
YGL131C	50.4109	0.507193	0.302435	1.67703	0.0935364	0.35555
YGL130W	113.857	0.109527	0.24148	0.453565	0.650142	0.877142
YGL129C	112.169	-0.38826	0.229316	-1.69313	0.0904313	0.34915
YGL128C	54.6785	0.173887	0.296865	0.585742	0.558049	0.830429
YGL127C	84.0268	-0.282369	0.26332	-1.07234	0.283566	0.622798
YGL126W	51.8416	-0.388352	0.33082	-1.17391	0.240433	0.578465
YGL125W	23.24	0.231775	0.394701	0.587218	0.557058	0.830321
YBL006C	142.911	0.355547	0.228786	1.55406	0.120171	0.405321
YGL124C	43.3793	0.247598	0.310918	0.796346	0.425831	0.745171
YGL123W	3584.08	-0.312004	0.191831	-1.62645	0.103854	0.376561
YGL122C	326.493	0.119803	0.227504	0.526597	0.598473	0.852172
YGL121C	75.4326	-2.08317	0.832732	-2.5016	0.0123632	0.110438
YGL120C	338.152	0.153877	0.248211	0.619946	0.535294	0.817771
YGL119W	50.8742	-0.306122	0.303553	-1.00846	0.313232	0.65218
YGL117W	30.0009	0.0710522	0.366062	0.194099	0.846098	0.95332
YGL116W	83.9228	0.0396989	0.248866	0.159519	0.87326	0.961213
YGL115W	183.87	-0.193228	0.243394	-0.793889	0.42726	0.746301
YBL005W	39.2432	0.18877	0.351287	0.537367	0.591014	0.847389
YGL114W	47.4836	-0.279102	0.318255	-0.876977	0.380499	0.715328
YGL113W	47.6344	0.461331	0.313349	1.47226	0.140951	0.443568
YGL112C	129.851	-0.133459	0.22204	-0.60106	0.5478	0.824368
YGL111W	114.404	0.258756	0.26285	0.984424	0.324907	0.663707
YGL110C	67.3595	0.349171	0.272154	1.28299	0.199496	0.529917
YGL108C	86.942	0.2579	0.29578	0.871933	0.383245	0.717772
YGL107C	95.939	-0.0361541	0.255898	-0.141284	0.887646	0.966269
YGL106W	353.974	0.277933	0.214494	1.29576	0.195058	0.526509
YGL105W	1148.58	-0.0381179	0.194717	-0.19576	0.844798	0.953111
YGL104C	39.2737	-1.22678	0.379624	-3.23158	0.00123109	0.0224491
YAL047C	30.3016	0.467683	0.359387	1.30134	0.193144	0.524925
YBL005W-B	481.014	-0.333506	0.188863	-1.76586	0.0774196	0.322586
YGL103W	3428.52	-0.28875	0.194277	-1.48628	0.137204	0.439053
YGL101W	121.196	-0.120822	0.238874	-0.505796	0.613	0.859162
YGL100W	231.275	-0.157253	0.245073	-0.641657	0.521096	0.80932
YGL099W	125.851	0.594227	0.258953	2.29473	0.0217485	0.154401
YGL098W	36.627	0.286072	0.332395	0.860639	0.389437	0.722271
YGL097W	126.195	0.386641	0.227812	1.6972	0.0896593	0.347749
YGL096W	17.776	-1.42544	0.520983	-2.73606	0.00621805	0.0715263
YBL005W-A	93.42	-1.31312	0.27661	-4.74719	2.06265e-06	0.00011561
YGL095C	114.474	-0.186604	0.23553	-0.792275	0.4282	0.746467
YGL094C	128.254	0.0395897	0.253395	0.156237	0.875846	0.961731
YGL093W	60.9366	0.672076	0.278658	2.41183	0.0158728	0.12745
YGL092W	91.4032	0.0495296	0.277878	0.178242	0.858533	0.955903
YGL091C	42.8024	-0.0686762	0.322399	-0.213016	0.831314	0.950126
YGL090W	45.6961	0.405481	0.307446	1.31887	0.187213	0.51506
YGL087C	93.6226	-0.217484	0.266177	-0.817065	0.413891	0.73875
YGL086W	76.6067	0.668893	0.270152	2.47599	0.0132869	0.115794
YGL085W	20.4795	-0.528522	0.438377	-1.20563	0.227959	0.56706
YGL084C	91.1141	-0.289855	0.251934	-1.15052	0.249931	0.586799
YGL083W	57.6303	-0.172618	0.300521	-0.574395	0.5657	0.834671
YGL082W	107.099	-0.148054	0.250297	-0.591514	0.554176	0.829252
YGL081W	16.0744	-0.00945094	0.502053	-0.0188246	0.984981	0.996026
YGL080W	105.743	-0.345653	0.246831	-1.40036	0.161405	0.477367
YGL079W	27.4932	0.0666396	0.397708	0.167559	0.86693	0.959285
YGL078C	260.685	0.340967	0.232211	1.46835	0.142009	0.444858
YGL077C	155.93	0.385877	0.244319	1.5794	0.114244	0.394603
YGL076C	2059.29	-0.147593	0.207455	-0.711445	0.476808	0.784756
YBL004W	113.448	0.248549	0.290958	0.854244	0.39297	0.723968
YGL075C	16.2948	-0.345903	0.485079	-0.713084	0.475794	0.783442
YGL073W	105.907	0.0776145	0.248486	0.312349	0.754775	0.920738
YGL071W	136.703	0.442575	0.22361	1.97923	0.0477905	0.249739
YGL070C	78.0738	0.00868761	0.282013	0.0308057	0.975424	0.992967
YGL068W	177.882	-0.503793	0.225216	-2.23693	0.025291	0.169905
YGL067W	125.776	-0.217769	0.245864	-0.885727	0.375765	0.709293
YGL066W	93.2061	0.698332	0.25336	2.75628	0.00584621	0.0691984
YGL065C	59.8514	-0.285402	0.28108	-1.01537	0.309928	0.64832
YBL003C	696.821	0.0246899	0.198562	0.124343	0.901043	0.969921
YGL064C	36.169	0.731638	0.340722	2.14732	0.031768	0.196344
YGL063W	15.5405	0.510612	0.467226	1.09286	0.274456	0.613644
YGL062W	277.777	-0.859597	0.193221	-4.44877	8.63643e-06	0.000382748
YGL061C	59.6812	0.57732	0.301813	1.91284	0.0557686	0.271807
YGL060W	45.1	-0.288066	0.310415	-0.928004	0.353406	0.690742
YGL059W	33.8976	-0.703121	0.352192	-1.99641	0.0458891	0.244141
YGL058W	105.22	0.0944984	0.251764	0.375345	0.707404	0.903722
YGL057C	30.5457	-0.231807	0.361517	-0.641207	0.521388	0.809553
YGL056C	193.173	0.0736368	0.221979	0.331729	0.740094	0.914442
YGL055W	1196.33	-1.46541	0.546129	-2.68326	0.0072908	0.0781798
YBL002W	592.611	-0.271418	0.238553	-1.13777	0.255216	0.592156
YGL054C	273.173	-0.356646	0.223022	-1.59915	0.109787	0.387542
YGL053W	93.6523	-0.883852	0.253967	-3.48019	0.000501058	0.0112777
YGL051W	4.72922	0.273207	0.80045	0.341317	0.732865	0.910945
YGL050W	48.8821	-0.0718172	0.305676	-0.234945	0.814251	0.944705
YGL049C	133.043	0.0242365	0.229323	0.105687	0.91583	0.973635
YGL048C	302.579	0.0690555	0.19942	0.346281	0.729131	0.910624
YGL047W	32.8756	0.0720865	0.363942	0.198071	0.842989	0.952633
YBL001C	401.559	-0.598142	0.253069	-2.36356	0.0181004	0.13779
YGL045W	50.6344	-0.66203	0.298504	-2.21783	0.0265666	0.174576
YGL044C	61.4819	0.469168	0.287108	1.63412	0.102235	0.373822
YGL043W	177.501	0.3537	0.215888	1.63835	0.101349	0.371897
YGL041W-A	95.4357	-0.229976	0.244244	-0.941584	0.346406	0.68294
YGL040C	184.62	-0.45632	0.215965	-2.11293	0.0346064	0.206809
YGL039W	95.3107	-0.0874651	0.332811	-0.262807	0.792699	0.937303
YGL038C	243.614	-0.626363	0.230785	-2.71405	0.00664659	0.0746533
YGL037C	719.895	-1.43462	0.260723	-5.50245	3.74555e-08	3.69195e-06
YBR001C	111.238	0.23212	0.241497	0.961172	0.336466	0.67269
YGL036W	86.9418	-0.397146	0.257035	-1.54511	0.122321	0.40981
YGL035C	181.054	0.239286	0.226961	1.0543	0.291744	0.631871
YGL033W	2.65508	0.0604284	1.20177	0.0502826	0.959897	0.987117
YGL032C	120.529	-1.77183	0.313023	-5.66037	1.51044e-08	1.69317e-06
YGL031C	1198.96	-0.229066	0.194558	-1.17736	0.23905	0.577575
YGL030W	880.797	-0.250196	0.212559	-1.17706	0.23917	0.577575
YGL029W	134.534	0.546029	0.238945	2.28516	0.0223034	0.156431
YGL028C	190.861	-0.320924	0.233939	-1.37183	0.170117	0.491192
YGL027C	201.721	0.205383	0.238999	0.859349	0.390148	0.722752
YBR002C	88.9223	0.557999	0.274156	2.03534	0.041817	0.232779
YGL026C	307.066	-0.285877	0.201133	-1.42133	0.15522	0.467786
YGL025C	87.3503	0.120072	0.286891	0.418527	0.675562	0.890103
YGL023C	200.825	0.837095	0.260353	3.21524	0.00130336	0.0230691
YGL022W	350.19	0.127241	0.251189	0.506556	0.612466	0.859162
YGL021W	102.051	-0.475914	0.256503	-1.8554	0.0635395	0.289216
YGL020C	91.6409	-0.423462	0.265349	-1.59587	0.110519	0.388583
YGL019W	209.603	-0.0011002	0.236128	-0.00465935	0.996282	0.998854
YGL018C	46.7137	0.258487	0.325823	0.793336	0.427582	0.746454
YGL017W	36.2311	-0.0805773	0.328991	-0.244922	0.806517	0.941455
YGL016W	53.9615	-0.00178306	0.305248	-0.00584135	0.995339	0.998302
YBR003W	136.151	-0.673915	0.233893	-2.8813	0.00396044	0.0520502
YGL014W	127.204	-0.0939204	0.267	-0.351762	0.725017	0.910361
YGL013C	86.1144	0.178887	0.266027	0.672439	0.501304	0.79887
YGL012W	368.491	0.0263505	0.209912	0.125531	0.900103	0.969921
YGL011C	370.283	-0.0374714	0.191825	-0.195342	0.845126	0.953111
YGL010W	12.3138	-0.887761	0.535984	-1.65632	0.0976567	0.365621
YGL009C	128.724	-0.710197	0.272619	-2.60509	0.00918497	0.0902242
YGL008C	1855.49	-0.87945	0.214873	-4.09289	4.26027e-05	0.00146723
YGL007C-A	0.769852	-1.7272	2.05926	-0.838746	0.401612	0.730846
YGL006W-A	1.356	0.765283	1.49862	0.51066	0.609589	0.857784
YAL046C	45.4825	0.0702214	0.352845	0.199015	0.842251	0.952175
YBR004C	22.6153	-0.110723	0.430307	-0.257312	0.796938	0.939045
YGL006W	93.2049	-0.417197	0.270794	-1.54065	0.123403	0.411847
YGL005C	128.822	0.387862	0.22709	1.70797	0.087642	0.345313
YGL004C	67.2258	0.288642	0.268695	1.07424	0.282716	0.621409
YGL003C	91.4669	0.0181939	0.245594	0.0740812	0.940946	0.982575
YGL002W	60.8302	-0.702978	0.319012	-2.20361	0.0275518	0.179152
YGL001C	159.091	0.15913	0.261898	0.607605	0.54345	0.822367
YGR001C	182.099	0.219862	0.264128	0.832407	0.405179	0.733142
YGR002C	56.3299	0.0915805	0.280147	0.326902	0.743742	0.915585
YGR003W	37.4959	0.636438	0.33308	1.91077	0.0560345	0.272063
YGR004W	50.7084	-0.246796	0.315142	-0.783128	0.433552	0.750777
YBR005W	20.847	0.491731	0.42394	1.15991	0.246086	0.584493
YGR005C	189.367	0.315078	0.207806	1.51621	0.129466	0.422848
YGR006W	20.3147	-0.281666	0.428644	-0.657109	0.511111	0.803597
YGR007W	147.485	-0.0194216	0.233064	-0.0833318	0.933588	0.980734
YGR008C	582.69	-1.55536	0.265936	-5.84862	4.95676e-09	6.02932e-07
YGR009C	188.06	0.491602	0.230119	2.13629	0.0326558	0.199246
YGR010W	75.7623	-0.14515	0.267992	-0.54162	0.58808	0.844313
YGR012W	73.4272	0.230531	0.275158	0.837812	0.402136	0.730846
YGR013W	80.7376	0.2855	0.273082	1.04547	0.295804	0.635757
YGR014W	644.781	0.346085	0.190881	1.81309	0.069818	0.305627
YGR015C	32.3187	-0.421805	0.385515	-1.09413	0.273897	0.613585
YBR006W	39.9571	-0.561347	0.376415	-1.4913	0.135883	0.437167
YGR016W	6.0128	-0.0427595	0.711674	-0.0600831	0.952089	0.984099
YGR017W	202.824	0.28509	0.20855	1.36701	0.171622	0.493543
YGR019W	112.839	-0.671718	0.280119	-2.39797	0.0164862	0.130362
YGR020C	583.766	-0.238672	0.211358	-1.12923	0.2588	0.596152
YGR021W	67.3668	0.0680982	0.276791	0.246028	0.805661	0.941145
YGR023W	26.6935	-0.0541425	0.386962	-0.139917	0.888726	0.966308
YGR024C	98.9399	-0.0294631	0.262049	-0.112434	0.91048	0.972226
YGR026W	223.387	-0.749001	0.278521	-2.6892	0.00716226	0.0775504
YBR007C	55.8787	0.543262	0.283821	1.9141	0.055607	0.271701
YGR027C	1716.59	-0.598066	0.197968	-3.02103	0.00251916	0.0375976
YGR027W-B	1015.14	0.208886	0.203827	1.02482	0.305448	0.643184
YGR027W-A	14.5661	-0.263026	0.540646	-0.486504	0.62661	0.868654
YGR028W	73.1451	0.0426949	0.277922	0.153622	0.877908	0.96297
YGR029W	102.801	0.299945	0.250325	1.19822	0.230831	0.570705
YGR030C	28.8155	0.146551	0.393061	0.372846	0.709263	0.904698
YGR031W	115.276	0.512759	0.261984	1.95722	0.0503221	0.255782
YBR008C	21.3687	-0.365563	0.425648	-0.85884	0.390429	0.722752
YGR032W	133.23	0.0126914	0.28835	0.0440138	0.964893	0.989206
YGR033C	112.231	-0.173876	0.230307	-0.754974	0.450264	0.763846
YGR034W	1261.47	-0.238953	0.203363	-1.17501	0.239993	0.578441
YGR035C	119.829	1.06283	0.276426	3.84489	0.000120606	0.00339657
YGR036C	33.9649	-0.408261	0.373991	-1.09163	0.274995	0.614076
YGR037C	659.932	-0.3515	0.219805	-1.59914	0.10979	0.387542
YGR038W	46.9276	-0.374951	0.33826	-1.10847	0.267659	0.606742
YBR009C	767.711	0.494849	0.222667	2.22237	0.0262584	0.173363
YGR038C-B	823.167	1.22655	0.21927	5.59381	2.22138e-08	2.34248e-06
YGR038C-A	286.889	1.11847	0.251633	4.44483	8.79607e-06	0.000383871
YGR040W	88.3957	0.290522	0.254326	1.14232	0.253319	0.590149
YGR041W	57.4657	0.132361	0.295267	0.448277	0.653953	0.879269
YGR042W	57.6361	0.70596	0.29059	2.4294	0.0151239	0.123572
YGR043C	15.3819	-1.24212	0.510937	-2.43106	0.0150548	0.123309
YGR044C	136.051	-0.10968	0.226535	-0.484162	0.628271	0.868902
YGR046W	73.1709	-0.692619	0.274171	-2.52623	0.0115293	0.104318
YGR047C	56.9079	0.850207	0.288526	2.94672	0.00321164	0.0449966
YGR048W	92.9433	-0.439063	0.26061	-1.68475	0.0920363	0.352247
YBR010W	535.597	0.0244353	0.220262	0.110937	0.911666	0.972553
YGR049W	103.012	-0.269009	0.283973	-0.947304	0.343484	0.680616
YGR050C	8.86791	0.790111	0.64289	1.229	0.219072	0.557388
YGR052W	3.9281	-1.49111	0.970227	-1.53686	0.124327	0.413243
YGR053C	13.5045	-0.259263	0.541814	-0.478508	0.632288	0.870633
YGR054W	172.082	-0.289302	0.235149	-1.23029	0.218587	0.557388
YGR055W	224.493	-0.492498	0.538771	-0.914113	0.360657	0.697146
YGR056W	76.7104	-0.359926	0.261183	-1.37806	0.168185	0.487618
YGR057C	28.4641	0.126954	0.375354	0.338225	0.735194	0.91233
YGR058W	44.1122	0.101959	0.313889	0.324826	0.745313	0.916531
YGR059W	1.18682	-1.33677	1.70921	-0.7821	0.434156	0.750777
YBR011C	1898.41	-0.047154	0.195997	-0.240586	0.809876	0.942794
YGR060W	688.231	0.0892553	0.239971	0.371942	0.709936	0.904951
YGR061C	188.257	-0.113849	0.250486	-0.454513	0.64946	0.87694
YGR062C	38.5713	-0.550723	0.336341	-1.63739	0.101548	0.372148
YGR063C	60.9173	0.387574	0.284492	1.36234	0.173091	0.49462
YGR065C	49.5852	-0.47299	0.29937	-1.57995	0.114119	0.394603
YGR066C	4.08444	0.615061	0.902881	0.68122	0.495732	0.796004
YGR067C	16.081	0.0351328	0.480152	0.0731702	0.941671	0.982575
YGR068C	31.2521	0.486522	0.367862	1.32257	0.185979	0.514111
YGR070W	48.5928	-1.40703	0.324991	-4.32945	1.49483e-05	0.000593054
YBR012W-B	349.87	0.545893	0.221664	2.4627	0.0137896	0.117113
YGR071C	63.4084	-0.278631	0.278989	-0.998718	0.317931	0.657219
YGR072W	35.9275	0.431722	0.358665	1.20369	0.228709	0.567751
YGR074W	89.8741	-0.0595112	0.244604	-0.243296	0.807776	0.9415
YGR075C	10.5584	-0.42699	0.561199	-0.760854	0.446744	0.761457
YGR076C	72.5018	-0.161347	0.272061	-0.593055	0.553144	0.828702
YGR077C	93.6302	-0.422469	0.248505	-1.70004	0.0891232	0.347138
YGR078C	86.7722	0.525502	0.260562	2.0168	0.0437162	0.237891
YGR079W	105.934	0.258115	0.251034	1.02821	0.303852	0.642078
YGR080W	133.316	-0.31502	0.230953	-1.364	0.172568	0.49462
YGR081C	76.3654	0.938108	0.289577	3.23958	0.00119705	0.0220049
YBR012W-A	36.4472	0.182921	0.327128	0.559173	0.576044	0.83867
YGR082W	256.338	-0.452328	0.2203	-2.05324	0.0400497	0.227372
YGR083C	204.878	0.161973	0.23674	0.684178	0.493863	0.796004
YGR084C	112.36	-0.00650852	0.237318	-0.0274253	0.978121	0.993942
YGR085C	2653.89	-0.181129	0.19795	-0.915024	0.360179	0.696834
YGR086C	1913.91	-0.286824	0.194764	-1.47267	0.140839	0.443568
YGR087C	1.54931	1.95262	1.54665	1.26249	0.206774	0.541849
YGR088W	31.4583	-2.31421	0.42043	-5.50439	3.70449e-08	3.69195e-06
YGR089W	91.1149	-0.497497	0.246895	-2.01502	0.0439029	0.238114
YGR090W	113.395	-0.403113	0.248774	-1.6204	0.105147	0.379979
YAL044W-A	94.0277	-0.350183	0.268168	-1.30583	0.191609	0.521633
YBR013C	13.8327	-0.195352	0.506237	-0.38589	0.699578	0.899755
YGR091W	40.9991	0.524337	0.318813	1.64465	0.100041	0.369875
YGR092W	75.1314	-0.194849	0.266656	-0.730712	0.464955	0.776328
YGR093W	54.7738	0.450441	0.298555	1.50874	0.131366	0.42623
YGR094W	559.06	-0.0822547	0.235636	-0.349076	0.727033	0.910361
YGR095C	72.6145	0.0187154	0.270993	0.0690624	0.94494	0.982579
YGR096W	19.8586	0.131963	0.417072	0.316404	0.751696	0.919475
YGR097W	106.481	0.448175	0.264373	1.69524	0.0900307	0.348892
YGR098C	52.8146	-0.386009	0.297368	-1.29809	0.194258	0.525396
YGR099W	70.4052	-0.0886419	0.268858	-0.329698	0.741628	0.914859
YGR100W	106.968	0.0200777	0.234508	0.0856164	0.931771	0.979888
YGR101W	43.3899	-0.526752	0.312385	-1.68623	0.0917524	0.351574
YGR102C	82.4496	-0.353213	0.273128	-1.29321	0.195937	0.527388
YGR103W	524.894	0.69459	0.276032	2.51634	0.011858	0.106424
YGR104C	36.8818	0.183356	0.333616	0.549601	0.582593	0.842146
YGR105W	147.406	-0.0936124	0.254243	-0.3682	0.712724	0.906132
YGR106C	334.025	-0.368715	0.220434	-1.67268	0.09439	0.358081
YGR108W	109.801	-0.341878	0.257588	-1.32723	0.184434	0.511635
YGR109C	22.5131	-0.84203	0.422077	-1.99497	0.0460464	0.244653
YBR014C	60.9927	-0.80513	0.288945	-2.78645	0.00532896	0.064683
YGR109W-B	126.286	-0.274766	0.244492	-1.12382	0.261088	0.598733
YGR109W-A	1.29959	0.131524	1.51217	0.0869768	0.93069	0.979714
YGR110W	16.8314	-0.501656	0.470559	-1.06609	0.286385	0.625149
YGR111W	102.485	-0.339274	0.25799	-1.31507	0.188487	0.516444
YGR112W	56.1105	-0.244441	0.310588	-0.787027	0.431266	0.748952
YGR113W	67.6528	0.305686	0.268128	1.14008	0.254255	0.591364
YGR116W	271.204	-0.0474426	0.233563	-0.203125	0.839037	0.95017
YGR117C	76.4585	-0.099175	0.284569	-0.34851	0.727458	0.910361
YGR118W	932.25	-0.179218	0.197683	-0.906596	0.36462	0.699978
YBR015C	244.884	-0.0982614	0.22083	-0.444964	0.656346	0.879796
YGR119C	157.35	0.317284	0.212179	1.49536	0.134822	0.433995
YGR120C	31.5037	-0.764952	0.367908	-2.07919	0.0375997	0.219121
YGR121C	20.9141	0.26346	0.419827	0.627544	0.530303	0.815422
YGR122W	46.331	-0.575731	0.306654	-1.87746	0.0604544	0.28283
YGR123C	88.6188	0.0884835	0.264985	0.333919	0.738441	0.914374
YGR124W	743.492	-0.142847	0.231404	-0.617307	0.537032	0.818245
YBR016W	357.184	0.163116	0.263938	0.61801	0.536569	0.818245
YGR125W	64.6122	-0.216815	0.288541	-0.751416	0.452402	0.765202
YGR126W	4.99643	-0.342719	0.797823	-0.429568	0.66751	0.886859
YGR127W	26.6925	-1.11863	0.382456	-2.92486	0.00344615	0.0469087
YGR128C	116.085	0.170383	0.249651	0.682483	0.494934	0.796004
YGR129W	43.7403	0.666328	0.361512	1.84317	0.0653039	0.292751
YGR130C	208.754	0.0676336	0.247428	0.273346	0.784587	0.933002
YGR131W	8.38456	0.204596	0.643635	0.317875	0.75058	0.919475
YGR132C	340.054	-0.135716	0.21231	-0.639237	0.522669	0.810222
YGR133W	37.926	-0.16986	0.350583	-0.484506	0.628027	0.868902
YGR134W	48.5271	0.162662	0.32743	0.496784	0.619342	0.863814
YBR017C	120.973	-0.0924692	0.244062	-0.378877	0.704779	0.902604
YGR135W	408.046	-0.148622	0.192861	-0.770616	0.440935	0.757032
YGR136W	181.821	-0.397764	0.2224	-1.78851	0.0736939	0.314709
YGR138C	24.4505	-0.367664	0.380496	-0.966276	0.333906	0.671217
YGR140W	82.4948	0.545933	0.279799	1.95116	0.0510377	0.257517
YGR141W	38.8406	0.052011	0.323332	0.160859	0.872204	0.960954
YGR142W	19.831	-0.174321	0.449898	-0.387468	0.69841	0.899282
YGR143W	96.7146	-0.557599	0.247231	-2.25538	0.0241096	0.164531
YGR144W	0.896667	0.123724	1.8924	0.0653794	0.947872	0.98381
YBR018C	6091.86	-0.411015	0.205367	-2.00137	0.0453529	0.242547
YGR145W	174.585	0.839336	0.274494	3.05776	0.00223001	0.0339068
YGR146C	31.012	-0.113554	0.374188	-0.303467	0.761534	0.924179
YGR146C-A	0.839195	0.653348	1.85228	0.352726	0.724294	0.910361
YGR147C	157.885	0.59559	0.223938	2.65961	0.00782303	0.0811369
YGR148C	1205.18	-0.0608257	0.191897	-0.31697	0.751266	0.919475
YGR149W	35.144	-0.0227174	0.364749	-0.0622822	0.950338	0.984099
YGR150C	79.9273	0.0388362	0.268274	0.144763	0.884898	0.966189
YGR152C	89.864	0.989393	0.248694	3.97836	6.9392e-05	0.00220025
YGR153W	7.00244	1.5123	0.734587	2.0587	0.0395226	0.226169
YBR019C	9300.95	-0.186403	0.174781	-1.06649	0.286201	0.625062
YGR154C	17.8491	-0.306273	0.441134	-0.694287	0.487502	0.793127
YGR155W	610.797	-0.953922	0.202451	-4.71186	2.45462e-06	0.00013115
YGR156W	31.3209	0.236226	0.357486	0.660798	0.508742	0.802781
YGR157W	210.36	0.231916	0.308428	0.751929	0.452093	0.765202
YGR158C	84.8824	0.326224	0.277188	1.1769	0.239234	0.577575
YGR159C	747.975	0.394094	0.238156	1.65477	0.097971	0.366318
YGR161C	106.786	0.323938	0.285882	1.13312	0.257165	0.594746
YGR161W-C	55.2998	0.265992	0.293132	0.907416	0.364187	0.69985
YGR161W-B	78.8012	0.27905	0.267699	1.0424	0.297226	0.637449
YGR161W-A	39.8406	0.567096	0.328873	1.72436	0.0846422	0.33934
YBR020W	9516.69	-0.286929	0.181202	-1.58348	0.113313	0.393324
YGR161C-D	586.012	1.07226	0.24261	4.41967	9.88511e-06	0.000418758
YGR162W	468.367	0.113436	0.269413	0.421049	0.673719	0.889382
YGR163W	83.0154	-0.0392527	0.308715	-0.127149	0.898823	0.96968
YGR165W	142.056	-0.574578	0.235713	-2.43762	0.0147843	0.122164
YGR166W	51.6096	-0.399192	0.287473	-1.38862	0.164947	0.4826
YGR167W	696.43	-0.007921	0.204038	-0.0388211	0.969033	0.990163
YGR168C	24.6767	-0.123944	0.400028	-0.309839	0.756683	0.921593
YBR021W	145.923	0.440989	0.24301	1.8147	0.0695706	0.305283
YGR169C	55.3039	-0.039911	0.282826	-0.141115	0.887779	0.966269
YGR169C-A	166.378	-0.257575	0.282212	-0.912697	0.361402	0.698142
YGR170W	89.4991	-0.0636211	0.277367	-0.229375	0.818578	0.945798
YGR171C	47.0702	-0.322382	0.302304	-1.06642	0.286236	0.625062
YGR172C	42.7984	-0.523204	0.314319	-1.66456	0.0960001	0.361788
YGR173W	84.8579	0.399126	0.253248	1.57603	0.115018	0.395644
YGR174C	149.475	-0.406507	0.255191	-1.59295	0.11117	0.388722
YGR174W-A	6.78596	-1.61223	0.781148	-2.06392	0.0390251	0.224227
YGR175C	600.677	0.218644	0.210281	1.03977	0.298448	0.637842
YAL044C	244.764	0.658557	0.242047	2.72079	0.00651271	0.0740222
YBR022W	30.863	-0.298303	0.383698	-0.777441	0.436898	0.753468
YGR177C	28.6991	0.308677	0.367272	0.840459	0.400651	0.730439
YGR178C	182.808	0.119997	0.238017	0.504153	0.614154	0.859851
YGR179C	74.3296	0.257089	0.256604	1.00189	0.316398	0.656092
YGR180C	1850.09	0.244013	0.2109	1.15701	0.247269	0.585702
YGR181W	105.513	-0.417868	0.259222	-1.61201	0.10696	0.383697
YGR183C	176.798	-0.683799	0.249586	-2.73974	0.00614882	0.0710061
YGR184C	145.623	0.0388782	0.257726	0.150851	0.880094	0.964228
YGR185C	586.523	-0.083396	0.181645	-0.459114	0.646152	0.876385
YGR186W	200.101	0.612667	0.229413	2.67058	0.00757194	0.0799628
YBR023C	88.351	0.0334725	0.276019	0.121269	0.903478	0.969923
YGR187C	97.9722	0.455526	0.262669	1.73422	0.0828784	0.334041
YGR188C	36.6856	0.696754	0.333532	2.08902	0.0367058	0.214349
YGR189C	335.505	-0.12529	0.244719	-0.511974	0.608669	0.857718
YGR191W	114.044	-0.138516	0.234632	-0.590353	0.554954	0.829252
YGR192C	17918.9	-0.209689	0.209713	-0.999886	0.317366	0.656908
YGR193C	209.146	0.158956	0.20661	0.769352	0.441684	0.757154
YGR194C	80.1132	-1.02488	0.26774	-3.82791	0.000129237	0.00358663
YGR195W	67.601	0.247386	0.288232	0.858287	0.390734	0.722752
YBR024W	73.4234	-0.294246	0.273632	-1.07533	0.282226	0.621049
YGR196C	100.104	0.536615	0.258678	2.07445	0.0380375	0.221205
YGR197C	29.4274	0.103636	0.366027	0.283137	0.777072	0.931377
YGR198W	103.283	-0.352348	0.252196	-1.39712	0.162376	0.478755
YGR199W	80.1902	-0.507929	0.25764	-1.97147	0.0486705	0.251581
YGR200C	154.919	0.188483	0.254817	0.73968	0.459494	0.772422
YGR201C	21.5874	-0.164462	0.438639	-0.374936	0.707708	0.903722
YGR202C	179.28	0.041865	0.223762	0.187096	0.851585	0.955349
YGR203W	50.2234	-0.0661981	0.320713	-0.206409	0.836471	0.95017
YGR204W	418.308	-0.115552	0.191564	-0.6032	0.546376	0.823927
YBR025C	821.31	-0.342881	0.182719	-1.87655	0.0605802	0.283187
YGR205W	56.8429	-0.751958	0.295862	-2.54158	0.0110352	0.102022
YGR206W	37.3548	-0.697551	0.375878	-1.85579	0.063483	0.289189
YGR207C	158.984	-0.0798504	0.254745	-0.313452	0.753937	0.920738
YGR208W	82.0124	0.0452216	0.253973	0.178057	0.858679	0.955903
YGR209C	427.333	-0.394596	0.222777	-1.77126	0.0765181	0.32031
YGR210C	173.115	0.242704	0.215769	1.12483	0.260659	0.598272
YGR211W	219.733	0.197276	0.214107	0.921389	0.356847	0.69391
YGR212W	13.1608	-0.344808	0.518627	-0.664847	0.506148	0.801343
YGR213C	0.800918	3.18186	2.06642	1.5398	0.12361	0.412299
YGR214W	2160.23	-0.0499813	0.2117	-0.236095	0.813359	0.94457
YBR026C	162.228	-0.259616	0.24652	-1.05312	0.292285	0.632233
YGR215W	84.1233	-0.214536	0.274087	-0.782732	0.433785	0.750777
YGR216C	38.7561	-0.223413	0.3202	-0.697728	0.485348	0.790522
YGR217W	52.1827	0.059862	0.293482	0.203971	0.838376	0.95017
YGR218W	174.819	-0.226294	0.226928	-0.997204	0.318665	0.657219
YGR220C	84.2901	-0.105678	0.260417	-0.405802	0.684888	0.895792
YGR221C	108.132	0.213474	0.257453	0.829178	0.407004	0.733876
YGR222W	67.739	-0.428236	0.268893	-1.59259	0.111252	0.388771
YBR028C	121.845	0.192497	0.229797	0.837683	0.402209	0.730846
YGR223C	73.5745	-0.0784662	0.263842	-0.297398	0.766163	0.92682
YGR225W	4.0721	-1.63813	0.944588	-1.73423	0.0828771	0.334041
YGR227W	60.3723	-0.435143	0.280907	-1.54906	0.121366	0.407669
YGR229C	372.292	0.530317	0.202303	2.6214	0.00875707	0.0870681
YGR230W	45.7909	-0.54556	0.352731	-1.54667	0.121942	0.409121
YGR231C	318.546	0.0583555	0.200205	0.291478	0.770686	0.928559
YGR232W	81.5004	-0.79592	0.290575	-2.73912	0.0061604	0.0710061
YGR233C	137.683	0.119779	0.260582	0.459658	0.645762	0.876385
YGR234W	962.036	-0.397306	0.250935	-1.5833	0.113353	0.393324
YBR029C	237.058	0.359147	0.243565	1.47454	0.140336	0.443568
YGR235C	154.647	-0.0838219	0.238502	-0.351452	0.725249	0.910361
YGR236C	1.66281	-3.03374	1.60962	-1.88476	0.0594622	0.281179
YGR237C	112.546	0.0553305	0.234735	0.235715	0.813654	0.94457
YGR238C	48.8791	0.258596	0.304048	0.850511	0.395041	0.725956
YGR239C	74.9457	-0.370382	0.281179	-1.31725	0.187756	0.515809
YGR240C	548.639	-0.154756	0.202478	-0.764313	0.444681	0.759415
YGR241C	149.497	0.0756375	0.228286	0.331328	0.740397	0.914442
YGR243W	72.904	-0.341382	0.27668	-1.23385	0.217258	0.555689
YGR244C	649.936	0.354911	0.187128	1.89662	0.0578784	0.277128
YBR030W	68.9733	0.640968	0.287339	2.2307	0.0257008	0.171249
YGR245C	305.476	0.954434	0.284577	3.35387	0.00079691	0.016042
YGR246C	95.3461	0.566377	0.241412	2.3461	0.0189711	0.142333
YGR247W	50.4789	0.0671396	0.291275	0.230503	0.817701	0.945549
YGR248W	44.9595	-2.72305	0.458929	-5.93349	2.96555e-09	4.13514e-07
YGR249W	4.57644	0.0153971	0.850081	0.0181126	0.985549	0.996026
YGR250C	107.881	-0.584924	0.237498	-2.46286	0.0137836	0.117113
YGR251W	68.0083	0.556634	0.280419	1.98501	0.0471433	0.248175
YGR252W	114.691	0.0250092	0.23139	0.108083	0.91393	0.973349
YGR253C	430.985	0.0996254	0.200809	0.496119	0.61981	0.863836
YGR254W	1890.53	-1.39824	0.546155	-2.56015	0.0104628	0.0983816
YBR031W	2548.55	-0.29349	0.202326	-1.45058	0.146897	0.452789
YGR255C	218.934	-0.470567	0.239039	-1.96858	0.0490013	0.253063
YGR256W	7.7371	-1.53513	0.760273	-2.01918	0.0434681	0.237578
YGR257C	114.979	0.233303	0.226676	1.02923	0.30337	0.642078
YGR258C	45.1865	0.437156	0.323748	1.3503	0.176921	0.499979
YGR260W	228.422	-0.688749	0.206834	-3.32996	0.000868591	0.0168902
YGR261C	131.493	-0.10599	0.242465	-0.437134	0.662014	0.883292
YGR262C	156.376	0.042752	0.236299	0.180923	0.856428	0.955903
YGR263C	25.0455	-0.218838	0.419669	-0.521454	0.602051	0.853357
YGR264C	361.714	0.0235152	0.21421	0.109776	0.912587	0.972825
YBR033W	43.829	-0.581073	0.32269	-1.80072	0.0717477	0.310039
YGR266W	86.2284	0.169782	0.280809	0.604619	0.545432	0.823622
YGR267C	189.241	0.0710874	0.208612	0.340764	0.733281	0.910945
YGR268C	56.0922	-0.395724	0.285834	-1.38445	0.16622	0.484094
YGR270W	156.324	0.0642334	0.249536	0.257411	0.796861	0.939045
YGR271W	53.1422	-0.145163	0.285704	-0.508087	0.611393	0.859162
YGR271C-A	55.0455	0.661002	0.290417	2.27605	0.0228433	0.158682
YGR274C	94.1999	0.368341	0.259313	1.42045	0.155477	0.467794
YGR275W	115.871	0.315184	0.238487	1.3216	0.186302	0.514111
YGR276C	103.047	0.426248	0.250787	1.69964	0.0891981	0.347138
YAL043C	157.649	-0.024249	0.239007	-0.101457	0.919188	0.975677
YBR034C	247.891	0.423401	0.218971	1.9336	0.0531626	0.262462
YGR277C	70.0404	-0.0542452	0.275095	-0.197187	0.843681	0.952958
YGR278W	41.7523	-0.458371	0.31558	-1.45247	0.14637	0.452324
YGR279C	937.444	-0.344226	0.225141	-1.52893	0.126281	0.418277
YGR280C	227.567	0.921114	0.233709	3.94129	8.1044e-05	0.00247547
YGR281W	133.976	0.28962	0.250777	1.15489	0.248134	0.585702
YGR282C	1429.64	-0.216052	0.217059	-0.99536	0.319561	0.657643
YGR283C	36.6537	0.805826	0.327907	2.45748	0.0139915	0.118129
YGR284C	144.639	-0.370717	0.23806	-1.55724	0.119413	0.404434
YGR285C	1099.22	0.322705	0.220661	1.46245	0.143619	0.447443
YGR286C	69.0276	-0.481434	0.286117	-1.68265	0.0924432	0.353086
YBR035C	220.957	-0.1754	0.222595	-0.787979	0.430709	0.748212
YGR287C	12.7716	0.110017	0.502766	0.218823	0.826788	0.949527
YGR288W	18.5234	0.236921	0.44765	0.529256	0.596628	0.851029
YGR289C	34.1061	-0.0455978	0.334291	-0.136401	0.891504	0.967745
YGR292W	106.455	-0.700869	0.305934	-2.29092	0.0219682	0.155244
YGR294W	3.70028	1.14769	0.92867	1.23584	0.216517	0.55483
YGR295C	127.179	-0.29859	0.243898	-1.22424	0.220861	0.559225
YGR296W	36.1287	0.642058	0.355534	1.8059	0.0709343	0.307454
YHL050C	102.896	0.874538	0.637892	1.37098	0.170381	0.49149
YHL049C	6.49861	0.782352	0.703423	1.11221	0.266049	0.604587
YHL048W	78.2238	-0.725034	0.265134	-2.7346	0.00624566	0.0716997
YHL047C	206.036	2.68648	0.292787	9.17555	4.49283e-20	2.33505e-17
YHL046C	2.36869	1.98729	1.2779	1.55513	0.119916	0.405176
YHL044W	21.8285	-0.615229	0.51315	-1.19893	0.230557	0.570604
YHL042W	2.18759	1.7298	1.27781	1.35372	0.175824	0.498423
YHL040C	72.2204	1.45951	0.286056	5.10219	3.3574e-07	2.34156e-05
YHL039W	63.5822	0.0583979	0.285453	0.20458	0.8379	0.95017
YHL038C	73.1847	0.151397	0.274284	0.551972	0.580967	0.840645
YHL036W	14.5355	-1.29147	0.579941	-2.22689	0.0259545	0.172508
YHL035C	84.6481	0.194656	0.287338	0.677445	0.498124	0.796898
YHL034C	978.646	0.258786	0.19489	1.32785	0.184226	0.511635
YHL033C	1547.39	0.146164	0.261771	0.558368	0.576593	0.838988
YHL032C	153.185	0.0430139	0.240084	0.179162	0.857811	0.955903
YHL031C	237.342	-0.0634273	0.227399	-0.278925	0.780303	0.931377
YHL030W	55.1191	-0.500156	0.402681	-1.24207	0.214212	0.551644
YHL029C	98.7775	-0.0483655	0.245981	-0.196623	0.844123	0.953111
YHL028W	61.716	-2.97613	0.70733	-4.20756	2.58147e-05	0.000970937
YHL027W	134.845	-0.00164922	0.223268	-0.00738672	0.994106	0.998302
YHL026C	15.4835	-0.29036	0.479711	-0.605282	0.544992	0.823411
YBR036C	199.799	-0.0920328	0.205885	-0.44701	0.654868	0.879283
YHL025W	158.574	0.730652	0.24718	2.95596	0.00311702	0.0441089
YHL024W	4.17764	-0.604021	0.862968	-0.699935	0.483968	0.790301
YHL023C	60.9393	0.146675	0.320626	0.457463	0.647338	0.8764
YHL022C	2.8014	-0.0970377	1.01228	-0.0958603	0.923632	0.978294
YHL021C	213.442	-1.59714	0.269722	-5.92145	3.19113e-09	4.24271e-07
YHL020C	166.931	1.28392	0.227972	5.6319	1.78236e-08	1.95957e-06
YHL019C	73.2873	0.246433	0.259301	0.950372	0.341923	0.67946
YHL018W	6.86652	-1.07468	0.686422	-1.56562	0.117438	0.400592
YHL017W	99.0666	-0.301297	0.260739	-1.15555	0.247865	0.585702
YBR037C	101.845	-0.426818	0.254868	-1.67466	0.0940002	0.356839
YHL016C	18.3685	0.488713	0.44552	1.09695	0.272664	0.611781
YHL015W	2362.95	-0.336314	0.19222	-1.74963	0.0801829	0.327901
YHL014C	35.2167	0.129004	0.34662	0.372178	0.70976	0.904928
YHL013C	63.1624	0.797312	0.284064	2.8068	0.00500361	0.0616501
YHL012W	1.57373	0.360141	1.39468	0.258225	0.796233	0.938781
YHL011C	236.114	0.0393755	0.206082	0.191067	0.848473	0.954115
YHL010C	41.8044	-0.0666616	0.325095	-0.205052	0.837531	0.95017
YHL009C	64.0557	-0.010865	0.277167	-0.0392004	0.968731	0.990163
YBR038W	77.3712	0.0674351	0.285379	0.2363	0.8132	0.94457
YHL009W-B	42.4503	0.340241	0.334363	1.01758	0.308879	0.647309
YHL009W-A	3.3652	0.10114	0.948594	0.106621	0.91509	0.973635
YHL008C	80.5814	-0.16469	0.270096	-0.609745	0.54203	0.820949
YHL007C	156.663	0.342182	0.256824	1.33236	0.182742	0.509078
YHL006C	12.6412	0.745564	0.513515	1.45188	0.146534	0.452393
YHL004W	197.118	-0.398892	0.215142	-1.85409	0.0637267	0.289648
YHL003C	137.514	-0.244192	0.225957	-1.0807	0.27983	0.619592
YHL002W	119.881	0.132506	0.23626	0.560851	0.574899	0.838219
YHL001W	439.693	-0.305813	0.211206	-1.44794	0.147635	0.454513
YHR001W	153.629	-0.0591116	0.214419	-0.275682	0.782792	0.932324
YBR039W	975.76	-0.555571	0.192289	-2.88926	0.00386151	0.0512211
YHR001W-A	183.922	-0.696643	0.22004	-3.16598	0.00154562	0.0259373
YHR002W	26.5829	-0.419791	0.384151	-1.09278	0.274492	0.613644
YHR003C	70.9411	0.0614479	0.260318	0.236049	0.813395	0.94457
YHR004C	79.2317	-0.357172	0.278052	-1.28455	0.198949	0.529772
YHR005C	155.076	0.0508821	0.232861	0.218509	0.827033	0.949618
YHR005C-A	463.668	-0.188829	0.235635	-0.801365	0.42292	0.743492
YHR006W	97.3096	0.476545	0.268895	1.77223	0.0763561	0.32031
YHR007C	808.566	-0.137361	0.213792	-0.642497	0.52055	0.808784
YHR007C-A	3.88688	-1.21744	0.954863	-1.27499	0.202311	0.53448
YBR040W	0.844222	-0.577872	1.90925	-0.30267	0.762141	0.924279
YHR008C	551.843	-0.85872	0.221667	-3.87391	0.000107101	0.00304625
YHR009C	189.864	-0.603999	0.223316	-2.70468	0.00683709	0.0756047
YHR010W	1390.83	0.192201	0.222412	0.864168	0.387496	0.721659
YHR011W	28.4239	0.0343662	0.369498	0.0930079	0.925897	0.978982
YHR012W	86.5001	-0.116742	0.301464	-0.387249	0.698572	0.899287
YHR013C	160.519	0.216677	0.235629	0.919567	0.357799	0.694889
YHR015W	1.53291	-1.7291	1.58685	-1.08964	0.27587	0.615101
YBR041W	98.6704	-0.352028	0.245248	-1.4354	0.151174	0.461041
YHR016C	103.08	-0.536262	0.240872	-2.22633	0.0259918	0.172508
YHR017W	48.6138	-0.527047	0.306688	-1.71851	0.0857028	0.341319
YHR018C	198.128	-0.489526	0.250715	-1.95252	0.0508768	0.257382
YHR019C	1141.94	-0.294645	0.196131	-1.50229	0.133023	0.429846
YHR020W	251.892	0.0831254	0.231791	0.358622	0.719878	0.907695
YHR021C	364.626	-0.46223	0.233809	-1.97695	0.0480467	0.250509
YHR021W-A	2.15858	-0.195471	1.15602	-0.169089	0.865727	0.959062
YHR022C	2.91365	-2.91835	1.41138	-2.06773	0.0386652	0.222607
YHR022C-A	0.667324	1.48995	2.16016	0.689742	0.490356	0.794543
YAL042W	583.356	-0.00126783	0.187936	-0.00674608	0.994617	0.998302
YBR042C	61.0438	-0.171072	0.296773	-0.576443	0.564316	0.834504
YHR023W	74.395	0.181466	0.30994	0.585489	0.558219	0.830429
YHR024C	148.228	-0.0357302	0.219397	-0.162857	0.870631	0.960474
YHR025W	300.428	-0.252184	0.214832	-1.17387	0.240447	0.578465
YHR026W	129.489	-0.426783	0.279954	-1.52447	0.12739	0.419764
YHR027C	482.619	0.0719564	0.258061	0.278835	0.780372	0.931377
YHR028C	157.464	-0.0636215	0.225106	-0.28263	0.777461	0.931377
YHR029C	26.03	-0.0147587	0.375526	-0.0393015	0.96865	0.990163
YHR030C	95.6448	0.644884	0.244425	2.63837	0.00833051	0.0847429
YHR031C	74.3119	0.0527143	0.280258	0.188092	0.850804	0.955125
YHR032W	141.103	0.16755	0.253218	0.661681	0.508176	0.802184
YBR043C	90.855	0.160628	0.246297	0.652171	0.514291	0.805535
YHR033W	377.805	-0.742645	0.238453	-3.11443	0.00184302	0.0292682
YHR034C	48.7743	0.816724	0.302041	2.70402	0.00685057	0.0756076
YHR035W	20.4275	-0.24098	0.429963	-0.560466	0.575162	0.838219
YHR036W	84.5026	0.561953	0.266085	2.11193	0.0346923	0.206809
YHR037W	440.161	0.179173	0.190308	0.941491	0.346453	0.68294
YHR038W	16.2734	0.126852	0.472308	0.268579	0.788254	0.934483
YHR039C	182.542	-0.0837393	0.231058	-0.362417	0.71704	0.907
YHR039C-A	464.678	0.15798	0.206216	0.766088	0.443624	0.758886
YHR040W	85.3437	0.951507	0.300816	3.16309	0.00156107	0.0259373
YHR041C	47.8577	0.174686	0.31141	0.560951	0.574831	0.838219
YBR044C	60.6915	-0.035711	0.299314	-0.119309	0.90503	0.970143
YHR042W	510.926	0.236558	0.207886	1.13792	0.255153	0.592156
YHR043C	231.54	-0.399378	0.226777	-1.7611	0.0782215	0.324238
YHR044C	95.1452	0.517639	0.315902	1.63861	0.101295	0.371897
YHR045W	58.5325	-0.296772	0.293075	-1.01262	0.311244	0.649884
YHR046C	26.077	0.516638	0.373861	1.3819	0.167003	0.48519
YHR047C	206.749	-0.120558	0.22725	-0.530507	0.59576	0.850277
YHR048W	5.88454	-0.342996	0.747717	-0.458725	0.646432	0.876385
YHR049W	119.769	-0.957773	0.236242	-4.0542	5.0307e-05	0.00167296
YHR050W	135.324	-0.0803041	0.221329	-0.362826	0.716735	0.906944
YHR050W-A	259.102	-1.26651	0.26094	-4.85363	1.21225e-06	7.29517e-05
YHR051W	342.151	-0.931706	0.21527	-4.32808	1.50416e-05	0.000593054
YHR052W	163.609	0.28381	0.220066	1.28966	0.19717	0.527971
YHR053C	6682.42	-5.35886	1.42707	-3.75514	0.000173242	0.00464989
YHR054C	43.5847	-0.236213	0.346194	-0.682314	0.49504	0.796004
YHR055C	6685.23	-5.35948	1.42708	-3.75556	0.000172955	0.00464989
YHR056C	105.646	-0.296523	0.254266	-1.16619	0.243538	0.580508
YHR057C	126.821	0.523935	0.224257	2.33631	0.0194749	0.144812
YHR058C	43.2893	0.628369	0.331795	1.89385	0.058245	0.277626
YBR045C	11.7337	0.597998	0.554332	1.07877	0.280689	0.620011
YHR059W	85.0848	-0.445197	0.263946	-1.6867	0.0916618	0.351462
YHR060W	98.5039	-0.107581	0.267374	-0.40236	0.687419	0.898001
YHR061C	50.1804	0.208377	0.316968	0.657407	0.510919	0.803579
YHR062C	66.0611	0.459291	0.312453	1.46995	0.141574	0.444226
YHR063C	135.326	0.0741375	0.234344	0.316363	0.751727	0.919475
YHR064C	698.691	0.00808536	0.213169	0.0379293	0.969744	0.990712
YHR065C	135.761	0.545577	0.249741	2.18457	0.0289205	0.184518
YHR066W	97.2599	0.573144	0.2423	2.36543	0.0180093	0.13779
YHR067W	51.6816	0.511273	0.312946	1.63374	0.102313	0.373822
YHR068W	425.108	-0.00946435	0.189569	-0.0499255	0.960182	0.987117
YBR046C	101.199	-0.290888	0.250118	-1.16301	0.244827	0.581987
YHR069C	84.8971	0.41719	0.259837	1.60558	0.108366	0.38571
YHR070W	67.4617	0.512026	0.285965	1.79052	0.0733707	0.314622
YHR071W	62.7751	-0.883192	0.338817	-2.60669	0.00914218	0.0901135
YHR072W	106.416	0.159369	0.258455	0.616622	0.537484	0.818245
YHR072W-A	284.835	0.0462602	0.19818	0.233426	0.815431	0.945277
YHR073W	195.136	-0.078463	0.228832	-0.342884	0.731686	0.910744
YHR074W	139.218	-0.37252	0.23778	-1.56666	0.117194	0.400238
YHR075C	30.7001	-1.17146	0.390877	-2.99701	0.00272643	0.0399667
YHR076W	84.9928	-0.140324	0.271666	-0.516532	0.605483	0.855325
YBR047W	31.9833	1.03657	0.409535	2.53108	0.0113711	0.103848
YHR077C	167.187	0.52789	0.251618	2.09798	0.0359072	0.212067
YHR078W	62.0223	-0.47532	0.283059	-1.67922	0.0931085	0.354867
YHR079C	81.1279	-0.14034	0.266352	-0.526895	0.598267	0.85209
YHR080C	102.152	-0.0497442	0.243351	-0.204414	0.83803	0.95017
YHR081W	179.949	0.67513	0.253241	2.66595	0.007677	0.0803836
YHR082C	208.002	-0.239196	0.229689	-1.04139	0.297695	0.63747
YHR083W	128.899	-0.311428	0.230205	-1.35283	0.176109	0.498423
YHR084W	101.208	-0.13369	0.251487	-0.531597	0.595005	0.850094
YHR085W	29.8114	0.762393	0.379808	2.00731	0.0447163	0.240266
YBR048W	1994.78	-0.368212	0.229077	-1.60737	0.107972	0.384836
YHR086W	65.6783	-0.0305826	0.271297	-0.112727	0.910247	0.972226
YHR087W	113.825	-3.68933	0.60496	-6.09847	1.07088e-09	1.7492e-07
YHR088W	124.852	0.34011	0.240295	1.41539	0.156955	0.469216
YHR089C	336.283	0.0977532	0.198884	0.491508	0.623067	0.866405
YHR090C	58.5046	0.296613	0.288463	1.02825	0.303831	0.642078
YHR091C	66.7963	0.0695251	0.278744	0.249423	0.803034	0.941128
YHR092C	7.66274	1.14342	0.659496	1.73377	0.0829588	0.334041
YHR094C	1.15543	-0.234288	1.63978	-0.142878	0.886387	0.966189
YHR096C	3.97897	0.499523	0.885799	0.563924	0.572806	0.837143
YBR049C	174.268	0.540988	0.277474	1.94969	0.051213	0.257733
YHR097C	107.384	-0.603753	0.253431	-2.38232	0.017204	0.134365
YHR098C	181.186	-0.141326	0.243902	-0.579437	0.562295	0.833024
YHR099W	155.16	0.0201741	0.220957	0.0913034	0.927251	0.979364
YHR100C	31.8643	0.251661	0.377468	0.666709	0.504958	0.801085
YHR101C	30.3648	-0.199128	0.37424	-0.532086	0.594667	0.849952
YHR102W	84.715	0.236676	0.266351	0.888589	0.374224	0.708387
YHR103W	77.5099	-0.15662	0.288794	-0.542325	0.587594	0.844039
YHR104W	139.728	-1.2988	0.289593	-4.48492	7.29405e-06	0.000333601
YHR105W	20.6594	0.507269	0.41793	1.21376	0.224838	0.563278
YHR106W	50.3477	-0.644468	0.300794	-2.14255	0.0321489	0.197417
YBR050C	109.033	0.227254	0.239944	0.947112	0.343582	0.680616
YHR107C	269.869	0.443576	0.220881	2.00821	0.0446212	0.240135
YHR108W	374.975	-0.421427	0.189205	-2.22736	0.0259233	0.172508
YHR109W	18.151	-0.458192	0.440147	-1.041	0.297877	0.637574
YHR110W	173.784	-0.190454	0.220686	-0.863009	0.388133	0.721774
YHR111W	54.2921	0.103067	0.282744	0.364525	0.715466	0.906944
YHR112C	72.2939	-0.241207	0.278645	-0.865644	0.386686	0.721659
YHR113W	111.137	-0.634337	0.237563	-2.67019	0.00758087	0.0799628
YHR114W	137.872	0.31246	0.220011	1.4202	0.15555	0.467794
YHR115C	107.318	0.0160496	0.237993	0.0674373	0.946234	0.983031
YHR116W	40.961	0.250166	0.33193	0.753672	0.451046	0.764414
YAL041W	101.67	-0.180534	0.248538	-0.726386	0.467602	0.776969
YBR052C	348.318	-0.733053	0.23171	-3.16367	0.00155794	0.0259373
YHR117W	182.731	-0.301986	0.221683	-1.36224	0.173121	0.49462
YHR118C	48.492	0.638872	0.298807	2.13808	0.0325105	0.199209
YHR119W	102.885	0.0979204	0.23703	0.413114	0.679523	0.891867
YHR120W	32.9204	-0.162829	0.360266	-0.45197	0.651291	0.877753
YHR121W	122.09	-0.0979579	0.246174	-0.397922	0.690688	0.898363
YHR122W	36.9907	0.135016	0.338471	0.398898	0.689968	0.898363
YHR123W	84.4325	-0.269702	0.260808	-1.0341	0.301089	0.640136
YHR124W	5.72563	-0.498493	0.734472	-0.678709	0.497323	0.79685
YBR053C	118.65	-0.880161	0.257291	-3.42088	0.00062418	0.0133015
YHR127W	55.203	0.204024	0.293606	0.694892	0.487123	0.792962
YHR128W	94.2248	-0.51383	0.265653	-1.93422	0.0530863	0.262312
YHR129C	45.3807	0.717733	0.306757	2.33975	0.0192967	0.144208
YHR131C	74.8927	0.269047	0.276522	0.972967	0.33057	0.667392
YHR132C	248.689	-0.165243	0.197259	-0.837696	0.402201	0.730846
YHR132W-A	103	-0.245261	0.259329	-0.94575	0.344276	0.681283
YHR133C	107.767	-0.453799	0.237466	-1.911	0.0560042	0.272063
YHR134W	28.8639	-0.0470632	0.359913	-0.130763	0.895963	0.968847
YHR135C	394.693	0.0325778	0.197867	0.164645	0.869223	0.960075
YHR136C	465.712	0.830173	0.222617	3.72915	0.000192125	0.00501544
YBR054W	15.5169	-3.82984	0.765277	-5.00452	5.6002e-07	3.72283e-05
YHR137W	64.5354	-0.0568348	0.274216	-0.207263	0.835805	0.95017
YHR138C	72.2952	-0.289135	0.306921	-0.942051	0.346167	0.68294
YHR139C	1.76368	-1.32676	1.37174	-0.967208	0.33344	0.671217
YHR140W	5.75712	-1.02179	0.84689	-1.20652	0.227617	0.56706
YHR141C	1423.53	-0.0246661	0.215589	-0.114413	0.908911	0.971987
YHR142W	54.5101	-0.0106354	0.308137	-0.0345151	0.972466	0.992128
YHR143W	353.562	-0.154568	0.226122	-0.683559	0.494254	0.796004
YHR143W-A	157.651	0.227604	0.225881	1.00763	0.313632	0.65225
YHR144C	44.7469	0.176979	0.316351	0.559439	0.575862	0.83867
YBR055C	83.0885	0.125498	0.266203	0.471439	0.637328	0.87105
YHR146W	324.747	-0.220546	0.231444	-0.952915	0.340633	0.678064
YHR147C	93.1762	-0.493496	0.272289	-1.8124	0.0699252	0.30569
YHR148W	49.2298	0.877463	0.301653	2.90885	0.0036276	0.0490284
YHR149C	160.215	0.49127	0.238548	2.05942	0.0394541	0.226011
YHR150W	33.2708	-0.0447428	0.339443	-0.131812	0.895133	0.968668
YHR151C	40.7488	-0.511698	0.319181	-1.60316	0.108899	0.386454
YHR152W	191.356	0.109133	0.23143	0.471561	0.63724	0.87105
YHR153C	8.23595	-0.439877	0.643436	-0.683637	0.494205	0.796004
YHR154W	114.219	0.536544	0.24722	2.17031	0.0299833	0.188782
YHR155W	66.0778	-0.309143	0.294472	-1.04982	0.293799	0.633902
YHR156C	17.9777	0.890404	0.457927	1.94443	0.0518442	0.258679
YHR157W	2.94229	-0.960353	1.02897	-0.933316	0.350657	0.687283
YHR158C	100.143	0.448171	0.2635	1.70084	0.0889734	0.347138
YHR159W	31.9367	-0.0170705	0.353449	-0.048297	0.96148	0.987353
YHR160C	2.38911	1.95726	1.22778	1.59414	0.110904	0.388722
YHR161C	219.855	0.12739	0.229305	0.555552	0.578517	0.839022
YHR162W	152.197	-0.301779	0.24886	-1.21264	0.225266	0.563856
YHR163W	122.24	-0.0303679	0.253104	-0.119982	0.904498	0.970143
YBR056W	128.371	-0.938712	0.265564	-3.53479	0.0004081	0.00956192
YHR164C	39.6952	0.330898	0.333699	0.991606	0.32139	0.660693
YHR165C	109.681	-0.0974119	0.28193	-0.345519	0.729705	0.910624
YHR166C	32.1802	0.0939221	0.340182	0.276094	0.782476	0.932324
YHR167W	31.797	-0.00766859	0.398804	-0.0192289	0.984658	0.996026
YHR168W	24.6038	-0.339537	0.391226	-0.867879	0.385461	0.720972
YHR169W	74.201	0.591226	0.268264	2.20389	0.0275319	0.179152
YHR170W	461.788	0.304292	0.22719	1.33938	0.180448	0.505946
YHR171W	25.3423	-0.00614236	0.399066	-0.0153918	0.98772	0.996258
YHR172W	41.656	0.974935	0.346253	2.81568	0.00486748	0.0607585
YHR174W	6478.36	-0.129872	0.198385	-0.654646	0.512695	0.804588
YHR175W	121.266	0.411071	0.249133	1.65	0.098942	0.368036
YHR175W-A	28.3397	0.293522	0.362305	0.810152	0.417853	0.740434
YHR176W	32.4832	0.0314904	0.345956	0.0910243	0.927473	0.979364
YHR177W	5.16048	0.96622	0.835719	1.15616	0.247618	0.585702
YHR178W	36.8792	0.313022	0.336753	0.92953	0.352615	0.689896
YHR179W	823.857	0.300176	0.180715	1.66105	0.0967042	0.363006
YHR181W	40.1757	-0.618168	0.354196	-1.74527	0.0809379	0.329006
YHR182W	44.8564	0.108919	0.311628	0.349517	0.726701	0.910361
YBR056W-A	3.41023	0.655764	0.96465	0.679794	0.496635	0.796203
YHR183W	733.542	0.573248	0.198945	2.88144	0.00395867	0.0520502
YHR184W	2.09168	0.614143	1.26212	0.486597	0.626544	0.868654
YHR186C	57.4502	-0.0359538	0.280601	-0.128131	0.898045	0.969665
YHR187W	80.6831	-0.256494	0.257644	-0.995537	0.319475	0.657643
YHR188C	338.847	-0.304256	0.213369	-1.42596	0.15388	0.464483
YHR189W	24.6392	-0.498484	0.409639	-1.21689	0.223648	0.562556
YHR190W	481.102	-0.219301	0.191387	-1.14585	0.251856	0.588419
YHR191C	55.0432	0.140096	0.303602	0.461445	0.644479	0.876385
YBR057C	103.184	0.118647	0.242913	0.488433	0.625243	0.868233
YHR192W	79.3424	0.0987707	0.283137	0.348845	0.727206	0.910361
YHR193C	1129.99	0.171995	0.239188	0.719081	0.472091	0.781171
YHR194W	52.4143	-0.216332	0.291819	-0.741324	0.458497	0.771403
YHR195W	98.5435	-0.258845	0.259226	-0.99853	0.318023	0.657219
YHR196W	116.953	0.47294	0.252867	1.87031	0.0614401	0.284213
YHR197W	71.231	0.377033	0.32989	1.1429	0.253078	0.590149
YHR198C	75.8053	-0.898181	0.294348	-3.05143	0.00227755	0.0345378
YHR199C	101.059	-0.0618606	0.241041	-0.256639	0.797458	0.939045
YHR199C-A	30.7238	-0.0217354	0.380745	-0.0570864	0.954476	0.984971
YHR200W	267.559	-0.0162741	0.206997	-0.07862	0.937335	0.981455
YBR058C	100.393	-0.189978	0.261901	-0.725382	0.468218	0.777688
YHR201C	104.476	0.283107	0.2493	1.13561	0.25612	0.593579
YHR202W	31.8082	-0.800124	0.412131	-1.94143	0.0522059	0.259868
YHR203C	1961.53	-0.0503458	0.239054	-0.210604	0.833196	0.95017
YHR204W	96.1594	-0.673263	0.241158	-2.7918	0.00524163	0.0640307
YHR205W	171.363	0.267718	0.268307	0.997805	0.318374	0.657219
YHR206W	122.833	0.146894	0.235051	0.624944	0.532008	0.816288
YHR207C	65.2258	0.75769	0.27417	2.76357	0.00571721	0.0682365
YHR208W	193.703	-0.147489	0.222646	-0.662437	0.507691	0.802184
YHR209W	17.187	-0.0818603	0.473161	-0.173007	0.862646	0.95805
YHR210C	6.78414	0.366281	0.699717	0.52347	0.600647	0.852854
YAL040C	142.325	-0.653221	0.248144	-2.63242	0.00847788	0.0852796
YBR058C-A	112.695	-0.102267	0.29328	-0.348703	0.727312	0.910361
YHR211W	62.351	0.466273	0.296195	1.57421	0.115438	0.396397
YHR214W	68.5535	3.23548	0.348092	9.29492	1.47321e-20	8.42237e-18
YHR214C-B	925.581	1.32279	0.235209	5.62386	1.86732e-08	2.01424e-06
YHR214C-C	318.023	1.55417	0.262256	5.92615	3.10127e-09	4.22142e-07
YHR214C-D	0.815071	1.88421	2.03108	0.927687	0.35357	0.690789
YBR059C	184.025	-0.0824945	0.230521	-0.357861	0.720447	0.908024
YHR215W	624.448	1.00145	0.228665	4.37957	1.18913e-05	0.000496224
YHR216W	88.8856	0.182202	0.256771	0.709591	0.477958	0.785875
YHR218W	21.0716	1.07006	0.42512	2.51707	0.0118336	0.106372
YHR219W	66.4601	0.664698	0.279645	2.37693	0.0174574	0.135052
YIL177C	289.752	0.738592	0.257623	2.86695	0.00414446	0.0539347
YIL176C	2.36879	3.64917	1.50514	2.42447	0.0153306	0.124143
YIL173W	48.3997	0.0545445	0.306142	0.178167	0.858592	0.955903
YIL172C	23.5258	0.229735	0.392351	0.585534	0.558188	0.830429
YBR060C	81.5838	0.302733	0.253715	1.1932	0.232791	0.572167
YIL169C	4.28705	3.63015	1.23921	2.92941	0.00339604	0.0467482
YIL167W	10.8102	-0.0525755	0.551917	-0.0952597	0.924109	0.978294
YIL166C	10.1654	-0.422581	0.581009	-0.727322	0.467029	0.776969
YIL165C	13.7185	-6.90986e-05	0.49048	-0.00014088	0.999888	0.999888
YIL164C	27.2666	-0.132188	0.407648	-0.32427	0.745733	0.91668
YIL162W	196.862	-0.0762105	0.32517	-0.234372	0.814696	0.94475
YIL161W	34.2682	-0.0109803	0.335836	-0.0326954	0.973917	0.992139
YBR061C	62.2593	0.233478	0.28081	0.831444	0.405723	0.733643
YIL160C	2.23542	0.74549	1.19779	0.622391	0.533685	0.817186
YIL159W	36.7078	0.3599	0.336085	1.07086	0.284232	0.623066
YIL158W	123.006	0.198049	0.24257	0.816464	0.414235	0.739133
YIL157C	152.339	-0.233415	0.240327	-0.971236	0.331431	0.668588
YIL156W-B	69.0032	-0.243218	0.301095	-0.807779	0.419218	0.741461
YIL156W	50.0472	0.000242074	0.308996	0.000783422	0.999375	0.99955
YIL155C	235.61	0.0325442	0.263795	0.123369	0.901815	0.969921
YIL154C	93.689	0.369661	0.273191	1.35313	0.176016	0.498423
YIL153W	94.6784	-0.192814	0.269401	-0.715715	0.474167	0.782567
YIL152W	39.9676	-0.0575587	0.333233	-0.172728	0.862865	0.95805
YBR062C	56.7713	-0.0504569	0.299168	-0.168657	0.866066	0.959062
YIL151C	114.375	-0.145962	0.243071	-0.60049	0.54818	0.824445
YIL150C	10.497	0.631437	0.609255	1.03641	0.300012	0.638796
YIL149C	133.064	0.724133	0.270625	2.67578	0.00745563	0.0792265
YIL148W	2353.32	-0.273371	0.217448	-1.25718	0.20869	0.544196
YIL147C	120.255	0.268181	0.263872	1.01633	0.309472	0.648316
YIL146C	24.8982	0.649889	0.380931	1.70605	0.0879981	0.345832
YIL145C	112.327	-0.28378	0.24505	-1.15805	0.246845	0.585505
YIL144W	62.6688	0.501026	0.279601	1.79193	0.0731443	0.314457
YIL143C	106.023	0.0673119	0.23519	0.286202	0.774723	0.930872
YIL142W	335.061	0.214031	0.221959	0.96428	0.334906	0.672289
YBR063C	20.7874	-0.247465	0.405902	-0.609667	0.542082	0.820949
YIL140W	117.774	-0.0928386	0.229808	-0.403983	0.686225	0.89713
YIL139C	18.3967	-0.0391455	0.460772	-0.0849562	0.932296	0.979982
YIL138C	193.312	0.340899	0.213158	1.59928	0.109758	0.387542
YIL137C	141.018	-0.454518	0.232009	-1.95906	0.0501062	0.255782
YIL136W	250.079	-1.24454	0.309736	-4.01809	5.86727e-05	0.00190586
YIL135C	155.19	-0.20444	0.259286	-0.788471	0.430421	0.748166
YIL134C-A	0.986751	0.190876	1.75853	0.108543	0.913565	0.973141
YIL134W	22.3366	-0.85684	0.421301	-2.0338	0.0419723	0.232779
YIL133C	700.847	-0.249334	0.200654	-1.24261	0.214012	0.551378
YBR065C	20.6868	-0.299076	0.415394	-0.719982	0.471536	0.780512
YIL132C	16.8004	-0.207936	0.45577	-0.456229	0.648225	0.876929
YIL131C	135.218	0.698454	0.227523	3.06981	0.00214193	0.0330957
YIL130W	139.428	0.0988202	0.228646	0.432198	0.665597	0.885444
YIL129C	75.4107	-0.111451	0.289198	-0.385381	0.699955	0.899826
YIL128W	54.1967	-0.500847	0.310182	-1.61468	0.106379	0.382256
YIL127C	117.299	0.78355	0.255467	3.06713	0.00216122	0.0331252
YIL126W	213.39	0.351514	0.244104	1.44002	0.149862	0.458653
YIL125W	453.223	-0.850298	0.230735	-3.68517	0.000228554	0.0058073
YIL124W	264.212	-0.974599	0.263998	-3.69169	0.000222767	0.00571103
YIL123W	317.382	0.0142286	0.231426	0.0614822	0.950975	0.984099
YBR066C	73.2338	-0.109953	0.316324	-0.347595	0.728145	0.910398
YIL122W	32.5027	0.312481	0.350752	0.89089	0.372988	0.707442
YIL121W	77.5946	-0.721917	0.290198	-2.48767	0.0128584	0.113444
YIL120W	21.1188	-0.701905	0.484996	-1.44724	0.14783	0.454624
YIL119C	37.3679	-1.76921	0.422927	-4.18326	2.87362e-05	0.00106678
YIL118W	221.942	0.216244	0.227913	0.948801	0.342722	0.679957
YIL117C	65.895	1.37672	0.284794	4.83409	1.33756e-06	7.96544e-05
YIL116W	67.2642	-0.595505	0.307276	-1.93801	0.052622	0.260541
YIL115C	141.749	0.0369949	0.248973	0.14859	0.881877	0.964493
YIL114C	35.1942	0.413303	0.34364	1.20272	0.229084	0.568426
YIL113W	17.951	-0.264905	0.438806	-0.603695	0.546046	0.82368
YBR067C	889.477	-1.45421	0.608171	-2.39112	0.0167973	0.131909
YIL112W	91.4795	0.470442	0.25802	1.82327	0.0682619	0.30182
YIL111W	131.302	-0.942813	0.347636	-2.71207	0.00668649	0.0748285
YIL110W	54.7269	0.250228	0.296444	0.844097	0.398615	0.728776
YIL109C	311.854	-0.189428	0.228874	-0.827651	0.407868	0.733876
YIL108W	44.4809	-0.437495	0.315657	-1.38598	0.165752	0.483471
YIL107C	80.1849	0.0788952	0.274146	0.287786	0.773511	0.930002
YIL106W	76.8356	-0.297544	0.255785	-1.16326	0.244725	0.581986
YIL105C	83.5686	-0.164377	0.281889	-0.583128	0.559807	0.830846
YIL104C	41.5926	0.991239	0.318824	3.10905	0.00187691	0.0296417
YBR068C	216.252	0.0265061	0.228955	0.11577	0.907835	0.9712
YIL103W	41.0486	0.298264	0.324378	0.919495	0.357837	0.694889
YIL102C-A	8.66222	0.0369297	0.605357	0.0610049	0.951355	0.984099
YIL101C	68.0767	-0.492656	0.276621	-1.78098	0.0749165	0.317257
YIL099W	7.00332	0.44241	0.697109	0.634635	0.525667	0.812608
YIL098C	73.7467	0.28691	0.272166	1.05417	0.291804	0.631871
YIL097W	38.697	-0.6412	0.333838	-1.92069	0.0547704	0.268544
YIL096C	54.4631	0.533104	0.329395	1.61843	0.105569	0.381022
YAL039C	140.766	0.88061	0.253112	3.47914	0.000503032	0.0112778
YBR069C	271.21	-0.202569	0.243031	-0.83351	0.404557	0.733142
YIL095W	46.0974	0.445931	0.338717	1.31653	0.187997	0.516044
YIL094C	435.154	0.862587	0.190434	4.52958	5.9101e-06	0.00027924
YIL093C	141.923	0.248658	0.240712	1.03301	0.3016	0.640271
YIL092W	29.8799	0.282384	0.366991	0.769458	0.441621	0.757154
YIL091C	127.233	0.59997	0.24268	2.47227	0.0134259	0.116121
YIL090W	69.2101	-0.202682	0.272343	-0.744214	0.456747	0.769818
YIL089W	6.41306	-0.145574	0.694973	-0.209467	0.834083	0.95017
YIL088C	150.668	-0.169632	0.230433	-0.736144	0.461643	0.773885
YIL087C	76.8965	-1.00043	0.335321	-2.9835	0.00284973	0.0410375
YBR070C	34.1609	0.328867	0.336704	0.976723	0.328706	0.665631
YIL085C	143.303	-0.309773	0.218613	-1.41699	0.156485	0.469185
YIL084C	40.0278	-0.257534	0.34574	-0.744877	0.456346	0.769369
YIL083C	188.613	-0.174539	0.234119	-0.745512	0.455963	0.769025
YIL082W-A	151.484	-0.402053	0.224896	-1.78773	0.0738193	0.314709
YIL079C	55.4025	0.58551	0.295697	1.98011	0.0476917	0.249454
YIL078W	756.685	-0.0441395	0.217305	-0.203122	0.83904	0.95017
YIL077C	60.1314	-0.348437	0.284688	-1.22392	0.220981	0.559225
YIL076W	202.554	-0.241052	0.210639	-1.14439	0.252463	0.589159
YIL075C	475.424	0.155989	0.207814	0.750619	0.452882	0.765787
YBR071W	127.569	-0.576849	0.303505	-1.90062	0.0573514	0.275647
YIL074C	199.093	-0.0741462	0.251645	-0.294646	0.768264	0.927009
YIL073C	1.39757	0.327119	1.52632	0.214318	0.830299	0.950126
YIL072W	3.31053	-0.854719	0.964021	-0.886618	0.375285	0.709293
YIL071C	42.5489	-0.26907	0.326672	-0.82367	0.410127	0.73579
YIL070C	235.61	-0.0140453	0.215426	-0.0651974	0.948017	0.98381
YIL069C	612.213	0.0997882	0.232896	0.428467	0.668311	0.887305
YIL068C	81.1497	0.128385	0.307061	0.418109	0.675868	0.890103
YIL067C	49.5945	0.235295	0.300573	0.782821	0.433732	0.750777
YIL066C	13.3644	0.221846	0.493703	0.449352	0.653178	0.878633
YIL065C	157.197	-0.153565	0.23889	-0.642828	0.520336	0.808784
YBR072W	122.415	-4.13667	1.24074	-3.33404	0.000855956	0.0167586
YIL064W	70.6624	0.341848	0.289622	1.18032	0.237871	0.577101
YIL063C	148.515	0.33199	0.226701	1.46444	0.143074	0.446483
YIL062C	146.384	-0.0102944	0.232078	-0.0443575	0.964619	0.989206
YIL061C	47.7877	0.605357	0.31551	1.91866	0.0550275	0.269343
YIL057C	246.017	4.23496	0.319596	13.251	4.45355e-40	1.27305e-36
YIL056W	87.588	0.244402	0.254305	0.961061	0.336521	0.67269
YIL055C	30.882	-0.186685	0.35827	-0.521075	0.602315	0.853357
YBR072C-A	2.2222	-0.629448	1.17697	-0.534804	0.592785	0.848511
YIL053W	564.81	-0.677345	0.200538	-3.37764	0.000731112	0.0150894
YIL052C	889.498	-0.185732	0.211303	-0.878983	0.379411	0.713896
YIL051C	603.69	-1.27852	0.252767	-5.05811	4.23435e-07	2.88188e-05
YIL050W	102.489	-0.356182	0.274625	-1.29698	0.19464	0.525847
YIL049W	29.3197	-0.682662	0.381934	-1.78738	0.0738758	0.314715
YIL048W	73.3439	-0.0206692	0.260124	-0.0794593	0.936667	0.981363
YIL047C	111.001	-0.147752	0.260973	-0.566157	0.571287	0.836677
YIL046W-A	0.808715	1.87516	2.03467	0.921603	0.356736	0.69391
YIL046W	100.792	0.859046	0.256494	3.34918	0.000810509	0.0162585
YIL045W	98.6292	-1.7605	0.314864	-5.59131	2.25357e-08	2.34248e-06
YBR073W	122.787	0.206179	0.262661	0.784963	0.432475	0.75014
YIL044C	120.405	-0.322302	0.227648	-1.41579	0.156837	0.469216
YIL043C	491.17	-0.000527126	0.208254	-0.00253117	0.99798	0.998854
YIL042C	78.314	-0.149687	0.269231	-0.55598	0.578224	0.839022
YIL041W	650.416	-0.393928	0.20119	-1.95799	0.050231	0.255782
YIL040W	43.754	-0.604434	0.351246	-1.72083	0.0852824	0.340712
YIL039W	179.356	-0.187364	0.228788	-0.818938	0.412822	0.738116
YIL038C	78.1048	0.211662	0.293995	0.719949	0.471556	0.780512
YIL037C	1.20334	-0.417933	1.62774	-0.256756	0.797367	0.939045
YIL036W	122.728	-0.0692772	0.254628	-0.272072	0.785567	0.933011
YIL035C	124.743	-0.0493976	0.243205	-0.203111	0.839049	0.95017
YBR074W	134.179	-0.0622659	0.242228	-0.257055	0.797136	0.939045
YIL034C	316.283	-0.675723	0.212066	-3.18638	0.00144063	0.0247329
YIL033C	352.923	-0.601472	0.209884	-2.86573	0.00416044	0.0539347
YIL031W	38.2413	-0.229252	0.333099	-0.68824	0.491302	0.795236
YIL030C	146.005	0.126492	0.275727	0.458758	0.646408	0.876385
YIL029C	5.68314	-1.24827	0.780069	-1.6002	0.109553	0.387542
YIL027C	84.5182	-0.390331	0.273137	-1.42907	0.152985	0.462745
YIL026C	101.348	0.299934	0.265563	1.12942	0.258719	0.596152
YIL024C	44.2307	0.104499	0.339054	0.308209	0.757923	0.922465
YIL023C	65.2781	-0.129491	0.29448	-0.439728	0.660134	0.882082
YBR076W	0.884551	-3.20621	2.02244	-1.58531	0.112895	0.392795
YIL022W	248.416	0.377441	0.224044	1.68467	0.0920514	0.352247
YIL021W	210.592	0.319582	0.207365	1.54116	0.123278	0.411671
YIL020C	27.4106	-0.226531	0.384299	-0.589465	0.555549	0.829479
YIL019W	65.1478	0.910661	0.27279	3.33832	0.00084286	0.016616
YIL018W	1673.13	-0.183166	0.211791	-0.864844	0.387125	0.721659
YIL017C	76.8223	-0.501294	0.267878	-1.87135	0.0612964	0.28398
YIL016W	136.005	0.222079	0.254664	0.872047	0.383183	0.717772
YIL015W	160.957	-1.05461	0.218675	-4.82274	1.41601e-06	8.3457e-05
YIL014C-A	15.9997	-0.254779	0.485752	-0.524504	0.599928	0.852545
YBR077C	77.4217	-0.110073	0.260829	-0.422013	0.673015	0.889214
YIL014W	105.896	-0.14663	0.237878	-0.616407	0.537626	0.818245
YIL013C	14.0528	-0.18282	0.526758	-0.347067	0.728541	0.910398
YIL011W	68.9467	-0.0762316	0.64295	-0.118565	0.90562	0.970143
YIL010W	87.2857	0.0265893	0.244071	0.108941	0.91325	0.972987
YIL009C-A	20.9227	-0.325541	0.421642	-0.772079	0.440068	0.756424
YIL009W	65.2348	-0.131623	0.271394	-0.48499	0.627684	0.868902
YIL008W	121.55	0.53726	0.245683	2.1868	0.0287568	0.183895
YIL007C	47.5168	0.196747	0.308037	0.638711	0.523011	0.810359
YBR078W	1195.95	-0.260035	0.185441	-1.40225	0.160839	0.476434
YIL006W	45.8037	-0.576721	0.325088	-1.77405	0.0760554	0.320183
YIL005W	129.333	0.0467857	0.243461	0.192169	0.847609	0.953894
[truncated: 3,718 more rows]

## Sheet: DGY1740
genes	baseMean	log2FoldChange	lfcSE	stat	pvalue	padj
YAL061W	97.1561	-0.358894	0.308035	-1.16511	0.243975	0.577837
YAR071W	407.003	0.709064	0.298252	2.3774	0.0174351	0.130763
YDR058C	27.6116	-0.0796591	0.438211	-0.181783	0.855753	0.95124
YDR059C	47.1798	-1.25976	0.428202	-2.94197	0.00326127	0.0424855
YDR060W	311.434	0.992549	0.270246	3.67276	0.000239946	0.00575214
YDR061W	96.2258	-0.0176443	0.284038	-0.0621196	0.950468	0.986042
YDR062W	236.954	0.0339926	0.259732	0.130875	0.895874	0.967177
YDR063W	242.135	-0.890185	0.270397	-3.29214	0.000994291	0.017695
YDR064W	1806.35	-0.166091	0.200815	-0.827084	0.408189	0.723252
YDR065W	17.7603	-0.134542	0.544004	-0.247318	0.804662	0.932349
YBL113C	212.738	1.24619	0.312469	3.98821	6.65728e-05	0.00209286
YDR067C	56.6363	-0.300962	0.343029	-0.877365	0.380288	0.705731
YDR068W	101.554	0.55219	0.336286	1.64203	0.100585	0.371271
YDR069C	41.8922	-0.429213	0.38754	-1.10753	0.268063	0.604265
YDR070C	210.579	-4.07849	0.904309	-4.51007	6.48073e-06	0.000257475
YDR071C	363.362	-0.421791	0.236977	-1.77988	0.0750953	0.319231
YDR072C	155.661	0.326911	0.252254	1.29596	0.19499	0.524314
YDR073W	95.7019	0.571291	0.29563	1.93246	0.0533032	0.261779
YDR074W	387.941	-1.5351	0.250367	-6.13141	8.71021e-10	6.82517e-08
YDR075W	53.7552	0.679245	0.363322	1.86954	0.0615475	0.284691
YBL112C	26.8922	1.0168	0.446684	2.27633	0.0228264	0.15305
YDR076W	15.3441	0.782728	0.558937	1.40039	0.161398	0.477748
YDR077W	8903.86	-0.808244	0.299212	-2.70124	0.0069082	0.073566
YDR078C	40.1044	-0.260201	0.458753	-0.567192	0.570584	0.822732
YDR079W	41.9935	-0.0331344	0.438319	-0.0755943	0.939742	0.98424
YDR079C-A	26.697	-0.126063	0.447848	-0.281487	0.778337	0.920934
YDR080W	48.6891	0.451759	0.350297	1.28964	0.197174	0.526534
YDR081C	84.5548	0.15329	0.29704	0.516059	0.605813	0.838074
YDR082W	31.445	0.656187	0.413767	1.58589	0.112765	0.393106
YDR083W	114.118	0.637706	0.302753	2.10636	0.0351734	0.204045
YDR084C	84.995	-0.862695	0.339906	-2.53804	0.0111474	0.0998702
YBL111C	34.8029	0.952158	0.411501	2.31387	0.0206749	0.144574
YDR085C	53.1859	-0.716593	0.357876	-2.00235	0.0452472	0.237074
YDR086C	337.899	0.166976	0.228136	0.731917	0.464219	0.760521
YDR087C	164.087	0.741845	0.306118	2.4234	0.015376	0.121982
YDR088C	56.4758	0.147515	0.3581	0.411937	0.680385	0.876576
YDR089W	63.6899	-0.644816	0.35939	-1.7942	0.0727819	0.313458
YDR090C	38.5602	-0.0788698	0.39419	-0.200081	0.841417	0.944614
YDR091C	186.712	-0.197153	0.265331	-0.743045	0.457455	0.756025
YDR092W	158.118	-0.319823	0.262002	-1.22069	0.222203	0.550625
YDR093W	191.044	0.441553	0.268593	1.64395	0.100186	0.370958
YDR096W	95.7768	-0.406387	0.302602	-1.34298	0.17928	0.501182
YDR097C	81.6285	0.562824	0.340213	1.65433	0.098061	0.36616
YDR098C	174.928	0.0343404	0.259414	0.132377	0.894686	0.967177
YDR098C-B	512.394	0.933814	0.231749	4.02941	5.59168e-05	0.00179002
YDR098C-A	213.792	0.870878	0.238366	3.65353	0.000258655	0.00608942
YDR099W	829.212	-0.34264	0.227405	-1.50674	0.131878	0.424499
YDR100W	57.5823	-1.08645	0.425069	-2.55594	0.0105901	0.0968392
YDR101C	135.392	0.709292	0.281361	2.52093	0.0117044	0.103637
YDR103W	73.2228	-0.122824	0.323926	-0.379173	0.70456	0.887946
YDR104C	36.5892	0.602499	0.402849	1.4956	0.134759	0.42956
YDR105C	90.3314	-0.60573	0.310356	-1.95173	0.0509707	0.253166
YDR107C	48.9902	-0.144584	0.396209	-0.364918	0.715173	0.893328
YDR108W	48.4593	0.00449917	0.37282	0.0120679	0.990371	0.995872
YDR109C	32.2897	0.54269	0.421646	1.28708	0.198068	0.526572
YDR110W	64.2113	0.90363	0.330962	2.73032	0.00632735	0.0689182
YDR111C	54.0954	-0.100438	0.355581	-0.282462	0.777589	0.920791
YDR113C	103.173	0.386006	0.279034	1.38337	0.166553	0.484971
YBL107C	73.3732	0.182708	0.333376	0.548053	0.583656	0.829281
YDR115W	144.015	-0.304678	0.276899	-1.10032	0.271192	0.606112
YDR116C	153.101	-0.0630976	0.261901	-0.240921	0.809616	0.933943
YDR117C	108.449	-0.176217	0.28323	-0.622169	0.533831	0.802228
YDR118W	28.684	-0.0872041	0.441104	-0.197695	0.843283	0.945587
YDR119W	174.266	0.0757647	0.263273	0.28778	0.773515	0.919068
YDR119W-A	87.2697	-2.51276	0.373765	-6.72284	1.78219e-11	1.79933e-09
YDR120C	172.201	0.898535	0.291552	3.0819	0.00205682	0.0301629
YDR121W	104.132	0.673211	0.306653	2.19535	0.0281385	0.1745
YDR122W	152.393	-0.236587	0.275613	-0.858406	0.390668	0.71374
YBL106C	41.1226	0.647763	0.419835	1.5429	0.122855	0.412662
YDR123C	50.6103	0.72207	0.350496	2.06014	0.0393856	0.219517
YDR125C	21.3141	-0.365555	0.52018	-0.702748	0.482213	0.771129
YDR126W	29.8989	-0.776309	0.438156	-1.77177	0.0764335	0.323469
YDR127W	179.941	0.00554503	0.27703	0.020016	0.984031	0.993704
YDR128W	85.3453	0.550651	0.315938	1.74291	0.0813498	0.333623
YDR129C	369.897	-0.377585	0.239012	-1.57977	0.114159	0.394558
YDR130C	57.9837	0.0415542	0.332277	0.125059	0.900477	0.968156
YDR131C	26.0171	-0.277144	0.463375	-0.598098	0.549774	0.813228
YDR132C	25.6244	0.218116	0.448019	0.486845	0.626368	0.847753
YBL105C	180.997	0.166727	0.289614	0.575687	0.564827	0.819155
YDR134C	1354.38	-0.843142	0.286407	-2.94386	0.00324141	0.0423319
YDR135C	181.089	0.520062	0.290374	1.79101	0.0732919	0.314365
YDR137W	53.671	0.519295	0.343876	1.51012	0.131012	0.423765
YDR138W	77.1963	0.274273	0.316504	0.86657	0.386178	0.708787
YDR139C	153.614	-0.242369	0.258403	-0.93795	0.34827	0.677847
YDR140W	41.9503	-0.0076195	0.386662	-0.0197058	0.984278	0.993742
YDR141C	98.4616	-0.536658	0.311493	-1.72286	0.084914	0.339268
YDR142C	38.9162	-0.3608	0.39329	-0.917389	0.358939	0.685725
YDR143C	131.04	-0.070524	0.270259	-0.26095	0.794131	0.929098
YDR144C	122.556	0.583936	0.300928	1.94045	0.0523246	0.258424
YBL104C	53.0252	0.369049	0.339545	1.08689	0.277083	0.612022
YDR145W	169.593	0.513129	0.256932	1.99714	0.04581	0.238831
YDR146C	120.273	0.088537	0.306981	0.288412	0.773031	0.919068
YDR147W	70.524	0.0489837	0.311244	0.15738	0.874945	0.960394
YDR148C	459.71	-1.59643	0.225605	-7.0762	1.48156e-12	1.76777e-10
YDR150W	386.237	0.228885	0.284913	0.803351	0.421772	0.730378
YDR151C	63.4905	-0.00284685	0.335348	-0.00848923	0.993227	0.996918
YDR152W	268.233	0.291459	0.237971	1.22477	0.220662	0.548522
YDR153C	154.229	0.262168	0.257928	1.01644	0.30942	0.640306
YDR155C	1737.31	-1.35665	0.278826	-4.86558	1.14119e-06	5.30199e-05
YDR156W	68.6364	-0.149599	0.326704	-0.457906	0.64702	0.859528
YAL060W	187.57	-0.830456	0.305909	-2.71471	0.0066333	0.0713683
YBL103C	94.4546	0.425931	0.306305	1.39055	0.164363	0.480997
YDR158W	692.396	-0.877796	0.25354	-3.46215	0.00053587	0.0110326
YDR159W	100.946	0.113848	0.283632	0.401392	0.688131	0.881144
YDR160W	62.5377	0.0202516	0.326516	0.0620234	0.950544	0.986042
YDR161W	72.0708	0.565659	0.328245	1.72328	0.0848371	0.339219
YDR162C	86.4148	0.246315	0.301259	0.817618	0.413575	0.725135
YDR163W	45.1008	-0.0436679	0.39818	-0.109669	0.912672	0.974182
YDR164C	115.509	0.11172	0.272591	0.409845	0.681919	0.87704
YDR165W	93.9305	0.144796	0.295816	0.489479	0.624502	0.847334
YDR166C	60.7413	0.312649	0.32854	0.951631	0.341284	0.671955
YDR167W	133.291	0.268503	0.266481	1.00759	0.313652	0.646768
YBL102W	81.5011	-0.520449	0.318982	-1.6316	0.102764	0.37514
YDR168W	203.66	0.145554	0.260592	0.558552	0.576468	0.826632
YDR169C	125.405	0.116558	0.298106	0.390995	0.695801	0.884554
YDR170C	232.376	-0.117971	0.280107	-0.421163	0.673636	0.875117
YDR170W-A	46.0167	0.180617	0.374119	0.482779	0.629253	0.8485
YDR171W	210.488	-2.18389	0.297302	-7.34568	2.04715e-13	2.95841e-11
YDR172W	339.159	0.665369	0.276272	2.40838	0.0160234	0.124888
YDR173C	28.1677	0.509693	0.433423	1.17597	0.239607	0.572116
YDR174W	510.577	-0.587353	0.228683	-2.56841	0.0102167	0.0949338
YBL101C	65.8697	-0.290216	0.353738	-0.820426	0.411973	0.724576
YDR175C	118.562	0.0897022	0.295356	0.303709	0.761349	0.912785
YDR176W	104.879	0.402013	0.287777	1.39696	0.162425	0.477748
YDR177W	270.397	0.248646	0.261098	0.952309	0.34094	0.671955
YDR178W	184.042	-2.1455	0.270746	-7.92439	2.29269e-15	4.62948e-13
YDR179C	17.9029	0.545651	0.573027	0.952226	0.340982	0.671955
YDR179W-A	15.7485	-0.0967554	0.568933	-0.170065	0.864959	0.955138
YDR180W	30.115	-0.0808924	0.426855	-0.189508	0.849695	0.948449
YDR181C	48.9467	0.757816	0.358567	2.11346	0.0345616	0.201833
YDR182W	200.639	-0.581448	0.256408	-2.26767	0.0233494	0.154974
YDR183W	44.5093	0.102356	0.381576	0.268245	0.788511	0.926725
YDR184C	70.6537	0.298002	0.313871	0.949442	0.342396	0.67325
YDR185C	25.4355	-0.603539	0.472597	-1.27707	0.201578	0.52835
YDR186C	271.484	0.0431224	0.245642	0.17555	0.860648	0.953911
YDR188W	292.073	0.543353	0.272733	1.99225	0.0463438	0.239337
YDR189W	139.88	-0.143092	0.285829	-0.500621	0.616638	0.842658
YDR190C	380.002	0.482517	0.237813	2.02898	0.0424608	0.22937
YDR192C	46.05	-0.253974	0.368512	-0.689188	0.490705	0.775581
YDR194C	256.489	0.547938	0.252838	2.16716	0.030223	0.183011
YBL100W-B	72.3544	0.737059	0.327096	2.25334	0.0242375	0.15886
YDR195W	34.3027	0.0127064	0.405289	0.0313515	0.974989	0.991586
YDR196C	125.803	-0.340351	0.270079	-1.26019	0.207601	0.536247
YDR197W	34.8875	-0.652104	0.430647	-1.51424	0.129965	0.422224
YDR198C	53.5055	0.468069	0.339016	1.38067	0.16738	0.485663
YDR200C	101.399	0.376458	0.282501	1.33259	0.182666	0.504483
YDR201W	74.7904	0.29122	0.371484	0.783938	0.433076	0.739458
YDR202C	56.0484	-0.814614	0.344455	-2.36493	0.0180333	0.132783
YDR204W	144.704	-0.90368	0.288586	-3.13141	0.00173969	0.0268629
YDR205W	62.3787	-0.266305	0.352438	-0.755608	0.449884	0.75021
YDR206W	108.397	0.456985	0.279225	1.63662	0.101709	0.372627
YDR207C	89.7634	0.250307	0.304235	0.822741	0.410655	0.724199
YDR208W	140.662	0.266297	0.262697	1.01371	0.310723	0.642243
YDR210W	71.5722	0.0591066	0.314646	0.187851	0.850994	0.948449
YDR210W-B	63.3208	0.905991	0.33	2.74543	0.00604322	0.0663475
YDR210W-A	22.1848	0.653316	0.483352	1.35164	0.176491	0.497723
YDR210C-D	599.576	0.959187	0.250054	3.83591	0.000125099	0.00345473
YDR210C-C	170.119	1.18074	0.264498	4.46408	8.04121e-06	0.000312714
YDR211W	193.246	0.506583	0.263522	1.92236	0.0545606	0.265717
YDR212W	238.69	0.0313919	0.242142	0.129642	0.896849	0.967177
YDR213W	46.1828	0.447367	0.366518	1.22059	0.222243	0.550625
YDR214W	200.101	-0.311226	0.303048	-1.02698	0.304428	0.636137
YDR216W	175.199	0.329995	0.296294	1.11374	0.265389	0.601486
YDR217C	63.4817	0.77112	0.348814	2.21069	0.0270572	0.17012
YDR219C	45.5917	0.162092	0.363713	0.44566	0.655843	0.86458
YDR221W	70.7633	0.659534	0.327358	2.01472	0.043934	0.233903
YBL099W	1080.54	-1.46155	0.260819	-5.60368	2.09847e-08	1.26632e-06
YDR224C	798.638	0.164314	0.216166	0.76013	0.447177	0.749339
YDR225W	758.404	-0.0139542	0.2232	-0.0625186	0.95015	0.986042
YDR226W	448.669	-0.562653	0.218825	-2.57125	0.0101333	0.0943666
YDR227W	62.6749	0.808714	0.343556	2.35395	0.0185752	0.135632
YDR228C	57.7295	0.363803	0.349943	1.03961	0.298523	0.631699
YDR229W	75.9044	0.170903	0.308438	0.55409	0.579517	0.828259
YDR231C	59.0468	-0.722878	0.339285	-2.13059	0.0331229	0.195569
YDR232W	195.099	-0.112149	0.303252	-0.369822	0.711515	0.891942
YDR233C	642.563	-0.135101	0.241802	-0.558725	0.576349	0.826632
YDR234W	95.4107	0.407768	0.304456	1.33933	0.180462	0.503105
YBL098W	45.8688	-0.60608	0.409	-1.48186	0.138378	0.436909
YDR235W	44.5164	-0.20166	0.376759	-0.53525	0.592477	0.833911
YDR236C	46.7666	-0.497813	0.386908	-1.28664	0.198219	0.526572
YDR237W	96.5511	-0.0140799	0.304291	-0.0462712	0.963094	0.98902
YDR238C	326.634	0.00948331	0.286801	0.0330658	0.973622	0.991586
YDR239C	52.0658	0.402753	0.378061	1.06531	0.286735	0.617362
YDR240C	52.0618	0.173797	0.357905	0.485594	0.627255	0.848078
YDR242W	16.0974	0.403285	0.555327	0.726211	0.467709	0.76328
YDR243C	34.1455	0.489879	0.403831	1.21308	0.2251	0.554044
YDR244W	65.2168	0.738196	0.323818	2.27966	0.0226279	0.152499
YBL097W	27.5805	0.858371	0.438461	1.95769	0.0502665	0.251332
YDR245W	219.937	0.211169	0.25704	0.821543	0.411337	0.724434
YDR246W	128.544	-0.136898	0.273315	-0.500879	0.616456	0.842658
YDR247W	44.3391	-0.211651	0.384485	-0.55048	0.58199	0.828259
YDR248C	56.1362	0.429799	0.34918	1.23088	0.218367	0.545918
YDR249C	19.7556	-0.441987	0.520699	-0.848834	0.395974	0.718022
YDR251W	166.602	-0.160765	0.277601	-0.579124	0.562505	0.817369
YDR253C	18.458	0.340106	0.577387	0.589044	0.555832	0.815009
YDR254W	26.7469	0.61784	0.453564	1.36219	0.173138	0.493471
YAL059W	67.6196	0.585357	0.328202	1.78352	0.0745012	0.317477
YBL095W	25.2668	0.058421	0.497611	0.117403	0.906541	0.970897
YDR255C	41.5778	-0.535838	0.387147	-1.38407	0.166337	0.484611
YDR257C	53.2626	0.648677	0.355585	1.82426	0.0681135	0.301498
YDR258C	140.898	-1.03056	0.310845	-3.31536	0.00091525	0.0167343
YDR259C	21.2258	-0.48744	0.495462	-0.983808	0.32521	0.657176
YDR260C	82.8681	-0.175489	0.308988	-0.567946	0.570071	0.822458
YDR261C	126.488	0.0402246	0.289938	0.138735	0.889659	0.967177
YDR261W-B	96.0576	0.9632	0.319986	3.01013	0.00261134	0.0363648
YDR261W-A	12.4097	1.3913	0.622994	2.23324	0.0255328	0.163672
YBL093C	132.847	0.491017	0.278559	1.76271	0.0779501	0.326086
YDR261C-D	582.14	0.707198	0.210626	3.35759	0.000786246	0.0146896
YDR261C-C	70.5322	1.3993	0.337807	4.14232	3.43812e-05	0.00117209
YDR262W	111.104	-0.212221	0.300215	-0.706897	0.479631	0.769814
YDR264C	217.683	0.414335	0.256496	1.61537	0.106231	0.38278
YDR265W	33.6636	-0.171306	0.430425	-0.397993	0.690636	0.882414
YDR266C	76.6189	0.0784614	0.303329	0.258667	0.795892	0.929148
YDR267C	98.0189	0.463143	0.293125	1.58002	0.114103	0.394558
YDR268W	30.1396	-0.240257	0.465195	-0.516465	0.60553	0.838074
YBL092W	3914.05	-0.340355	0.212464	-1.60194	0.109168	0.388039
YDR270W	79.1487	1.251	0.366347	3.41479	0.000638314	0.0126733
YDR272W	111.131	-0.247922	0.329232	-0.753031	0.451431	0.751432
YDR273W	13.2796	0.84416	0.60897	1.38621	0.165683	0.483642
YDR275W	102.414	-0.106138	0.327889	-0.323701	0.746164	0.90504
YDR276C	526.444	-0.665565	0.263259	-2.52817	0.0114659	0.102027
YDR277C	416.375	0.866703	0.24865	3.48563	0.000490982	0.0101884
YDR279W	41.714	0.343399	0.372265	0.92246	0.356289	0.684621
YDR280W	94.3796	0.505223	0.307538	1.6428	0.100425	0.371271
YDR281C	163.65	0.118957	0.257244	0.462427	0.643775	0.856722
YBL091C-A	59.0947	-0.656872	0.355664	-1.84689	0.064763	0.292332
YDR282C	34.2911	0.564617	0.408755	1.38131	0.167184	0.485663
YDR283C	85.1855	0.166287	0.307252	0.541207	0.588365	0.832518
YDR284C	126.969	-0.566164	0.285226	-1.98496	0.0471484	0.241728
YDR285W	20.7058	0.380481	0.537917	0.707322	0.479366	0.769814
YDR286C	23.0152	-0.187594	0.479866	-0.390929	0.695849	0.884554
YDR287W	46.8669	-0.222539	0.363393	-0.612393	0.540278	0.806115
YDR288W	56.1065	-0.104107	0.343967	-0.302664	0.762146	0.913322
YDR289C	64.8429	0.254907	0.341225	0.747035	0.455042	0.754571
YDR291W	56.9548	0.0157305	0.365768	0.0430067	0.965696	0.98995
YDR292C	117.047	0.109591	0.286393	0.38266	0.701972	0.886537
YBL091C	461.576	-0.221431	0.221047	-1.00174	0.31647	0.648252
YDR293C	221.143	-0.248246	0.259283	-0.957432	0.338349	0.67082
YDR294C	199.871	-0.156613	0.244223	-0.641268	0.521348	0.795431
YDR295C	41.1807	0.762122	0.415178	1.83565	0.0664095	0.296723
YDR296W	113.654	0.564067	0.279783	2.01609	0.043791	0.233404
YDR297W	235.859	-0.409101	0.266092	-1.53744	0.124185	0.413687
YDR298C	286.357	-1.82684	0.23988	-7.61562	2.62419e-14	4.17485e-12
YDR299W	122.689	0.572271	0.27893	2.05166	0.0402025	0.222332
YDR300C	121.656	0.153394	0.313354	0.489523	0.624471	0.847334
YDR301W	72.6298	0.00563914	0.36099	0.0156213	0.987536	0.994272
YDR302W	41.4327	-0.0642973	0.375012	-0.171454	0.863867	0.95483
YBL090W	92.4346	-0.312512	0.291011	-1.07388	0.282875	0.615858
YDR303C	67.136	0.377564	0.332832	1.1344	0.256627	0.594857
YDR304C	592.764	-0.732662	0.232378	-3.15289	0.00161664	0.0254112
YDR305C	39.674	-0.185534	0.395335	-0.469309	0.638849	0.854775
YDR306C	53.7998	-0.0601131	0.343919	-0.174788	0.861246	0.953911
YDR307W	72.9831	-0.325762	0.338089	-0.963539	0.335277	0.666759
YDR308C	122.122	-0.148392	0.288812	-0.513801	0.607391	0.838074
YDR309C	276.139	-0.258812	0.24885	-1.04003	0.298324	0.631533
YDR310C	174.123	0.604737	0.250714	2.41206	0.0158627	0.124112
YDR311W	73.6266	0.261964	0.320392	0.817637	0.413565	0.725135
YBL089W	41.7821	-0.330835	0.389736	-0.848871	0.395953	0.718022
YDR312W	106.295	0.848916	0.325043	2.6117	0.00900923	0.0863736
YDR313C	54.3874	0.137546	0.35226	0.390468	0.696191	0.88456
YDR314C	16.6209	-0.643871	0.553493	-1.16329	0.244713	0.578974
YDR315C	23.0886	0.0898123	0.488768	0.183752	0.854208	0.950327
YDR316W	80.5365	0.445876	0.347069	1.28469	0.198901	0.526572
YDR316W-B	43.0262	0.581602	0.405886	1.43292	0.151881	0.462514
YDR318W	49.3964	-0.0335491	0.350347	-0.0957596	0.923711	0.978849
YBL088C	51.7129	-0.0783447	0.370049	-0.211714	0.83233	0.941753
YDR319C	26.8248	-0.447566	0.463259	-0.966125	0.333981	0.665499
YDR320C	76.0962	0.0428226	0.329367	0.130015	0.896555	0.967177
YDR320C-A	60.8455	-0.42863	0.342158	-1.25273	0.210306	0.538588
YDR321W	138.735	0.103292	0.265419	0.389167	0.697153	0.884737
YDR322W	85.1788	-0.223508	0.321293	-0.695652	0.486647	0.773148
YDR322C-A	254.368	-1.0547	0.248732	-4.24032	2.232e-05	0.000808139
YDR323C	29.3879	-0.690845	0.446578	-1.54697	0.12187	0.410302
YDR324C	151.414	0.700595	0.296354	2.36405	0.0180766	0.132916
YDR325W	59.8777	0.193813	0.357615	0.54196	0.587846	0.832513
YDR326C	89.8016	0.0357291	0.326129	0.109555	0.912762	0.974182
YBL087C	617.452	-0.22263	0.21833	-1.0197	0.307873	0.639016
YDR328C	440.867	0.0296601	0.225303	0.131645	0.895265	0.967177
YDR329C	122.497	0.191211	0.278422	0.686767	0.49223	0.775756
YDR330W	135.989	-0.1743	0.278999	-0.624731	0.532148	0.802063
YDR331W	62.3509	-0.128093	0.324881	-0.394275	0.693378	0.883439
YDR332W	25.5047	0.667718	0.462095	1.44498	0.148464	0.456077
YDR333C	87.6083	0.282936	0.3623	0.780944	0.434835	0.739559
YDR334W	115.458	0.572257	0.278571	2.05426	0.0399503	0.222181
YDR335W	175.821	0.132883	0.257559	0.515932	0.605902	0.838074
YDR336W	26.7107	-0.348723	0.447851	-0.778659	0.436181	0.740352
YDR337W	81.0275	0.14414	0.31207	0.461882	0.644166	0.856722
YBL086C	90.9898	-0.0682271	0.307811	-0.221653	0.824584	0.939741
YDR338C	55.7586	0.0229895	0.347572	0.0661432	0.947264	0.986042
YDR339C	106.072	-0.0325797	0.28629	-0.113799	0.909397	0.972567
YDR341C	351.346	-0.0406899	0.237311	-0.171462	0.86386	0.95483
YDR342C	2470.04	0.504812	0.208791	2.41778	0.0156155	0.123095
YDR343C	2256.48	0.385229	0.205334	1.87611	0.0606399	0.281734
YDR345C	64.9204	0.376052	0.351386	1.0702	0.284531	0.616248
YDR346C	431.538	0.297735	0.259614	1.14684	0.251449	0.587759
YDR347W	130.822	-0.344317	0.293826	-1.17184	0.241261	0.57417
YDR348C	174.345	0.177342	0.257236	0.689412	0.490564	0.775581
YAL058W	61.3927	0.0684669	0.331332	0.206641	0.83629	0.942745
YBL085W	179.882	0.283981	0.264896	1.07205	0.283698	0.615858
YDR349C	171.057	0.131523	0.255276	0.515219	0.6064	0.838074
YDR350C	58.9209	-0.323807	0.34393	-0.941491	0.346453	0.676666
YDR351W	71.5594	0.109148	0.335491	0.325337	0.744926	0.90504
YDR352W	41.1808	-0.588426	0.389455	-1.5109	0.130815	0.423765
YDR353W	641.404	0.429932	0.218962	1.9635	0.0495878	0.249499
YDR354W	98.9822	-0.227518	0.292215	-0.778596	0.436218	0.740352
YDR356W	85.2046	0.58629	0.306536	1.91263	0.0557955	0.267558
YDR357C	57.6179	-0.492137	0.410984	-1.19746	0.231127	0.562028
YDR358W	88.4393	-0.327173	0.302146	-1.08283	0.278883	0.614151
YBL084C	34.5331	-0.43758	0.407822	-1.07297	0.283286	0.615858
YDR359C	75.4794	0.917136	0.361321	2.53828	0.0111397	0.0998702
YDR361C	166.731	0.22025	0.290755	0.75751	0.448744	0.74959
YDR362C	67.7796	0.201825	0.322859	0.625118	0.531894	0.802063
YDR363W	48.4123	0.340999	0.351737	0.969471	0.33231	0.664566
YDR363W-A	246.563	-0.187866	0.327781	-0.573144	0.566547	0.820139
YDR364C	74.652	0.0368948	0.332018	0.111123	0.911519	0.973692
YDR365C	579.873	0.351401	0.26135	1.34456	0.178767	0.500548
YDR365W-B	410.64	0.625219	0.238627	2.62007	0.00879126	0.0855543
YBL082C	93.2267	0.0556006	0.288325	0.19284	0.847084	0.947373
YDR367W	54.0863	-0.417628	0.378376	-1.10374	0.269708	0.604831
YDR368W	163.787	-1.19332	0.304047	-3.92479	8.68059e-05	0.00257184
YDR369C	20.568	0.13506	0.49708	0.271707	0.785847	0.925714
YDR370C	55.3655	-0.0173299	0.348497	-0.0497274	0.96034	0.988371
YDR371W	51.0582	-0.408878	0.354462	-1.15352	0.248698	0.583928
YDR372C	189.698	0.0402427	0.249354	0.161388	0.871788	0.959113
YDR373W	59.6197	-0.0479403	0.341881	-0.140225	0.888482	0.967177
YDR374W-A	21.7956	-0.858773	0.5089	-1.68751	0.0915056	0.353937
YBL081W	99.7953	0.290987	0.290019	1.00334	0.315699	0.648189
YDR375C	81.1026	0.283142	0.318604	0.888698	0.374166	0.698567
YDR376W	71.4278	-0.163766	0.317387	-0.515982	0.605867	0.838074
YDR377W	373.985	-1.77836	0.24951	-7.12739	1.02292e-12	1.27865e-10
YDR378C	282.572	0.00163484	0.268603	0.00608644	0.995144	0.996994
YDR379W	84.721	0.33108	0.29664	1.1161	0.264379	0.601486
YDR379C-A	55.6947	-2.10652	0.51527	-4.08819	4.34758e-05	0.00144461
YDR380W	40.585	-4.70314	0.7325	-6.42067	1.35679e-10	1.13066e-08
YDR381W	384.239	0.135591	0.219612	0.617411	0.536963	0.804755
YDR381C-A	41.0546	0.114865	0.42802	0.268363	0.78842	0.926725
YDR382W	1383.35	-0.267614	0.20834	-1.2845	0.198966	0.526572
YBL080C	42.0199	-0.454139	0.375226	-1.21031	0.226161	0.555735
YDR383C	35.1642	0.2342	0.411532	0.569093	0.569293	0.822458
YDR384C	92.1897	2.02637	0.311207	6.51131	7.44975e-11	6.62901e-09
YDR385W	4043.07	-0.0467675	0.248752	-0.188009	0.85087	0.948449
YDR386W	26.9887	0.481942	0.436575	1.10391	0.269631	0.604831
YDR387C	52.6005	-0.541956	0.362686	-1.49428	0.135101	0.430389
YDR388W	345.64	-0.450025	0.223482	-2.0137	0.0440415	0.234002
YDR389W	110.753	0.358471	0.291003	1.23185	0.218007	0.545782
YDR390C	98.0003	0.0612643	0.296657	0.206516	0.836388	0.942745
YDR391C	113.736	-1.50058	0.331463	-4.52713	5.97889e-06	0.000240052
YBL079W	130.591	0.321447	0.289691	1.10962	0.267162	0.604048
YDR392W	55.5033	0.396879	0.35851	1.10702	0.268284	0.604265
YDR393W	55.0271	0.0939728	0.357785	0.262652	0.792819	0.929098
YDR394W	321.019	-0.441711	0.236721	-1.86596	0.0620475	0.285713
YDR395W	136.05	0.40501	0.273813	1.47915	0.1391	0.43784
YDR397C	199.538	0.0998924	0.251427	0.397301	0.691145	0.882421
YDR398W	184.931	0.461576	0.286845	1.60915	0.107585	0.384754
YDR399W	230.585	0.271312	0.280314	0.967887	0.333101	0.665188
YDR400W	47.9349	0.0502814	0.370009	0.135892	0.891906	0.967177
YBL078C	59.7383	-0.873575	0.350668	-2.49117	0.0127322	0.107987
YDR404C	95.0618	-0.559545	0.301207	-1.85768	0.0632151	0.28809
YDR405W	228.251	0.543676	0.247288	2.19855	0.0279098	0.173609
YDR406W	99.8757	0.508004	0.29473	1.72362	0.0847763	0.339219
YDR407C	80.6376	0.196893	0.33485	0.588004	0.55653	0.815009
YDR408C	144.175	-0.236651	0.268844	-0.880254	0.378722	0.703397
YDR409W	28.6239	0.0894668	0.433069	0.206588	0.836332	0.942745
YDR410C	32.7104	0.0447739	0.41252	0.108538	0.913569	0.974559
YDR411C	87.6088	-0.583298	0.305047	-1.91216	0.055856	0.267558
YDR412W	125.357	0.835578	0.315741	2.64641	0.00813521	0.0815074
YDR414C	25.8305	0.318007	0.450552	0.705818	0.480302	0.770184
YBL076C	717.998	0.214323	0.250471	0.855677	0.392176	0.71565
YDR415C	69.6195	-0.0636132	0.32277	-0.197085	0.843761	0.945845
YDR416W	36.7008	0.362193	0.395881	0.914905	0.360241	0.686735
YDR418W	1302.25	-0.218326	0.202476	-1.07828	0.280908	0.615858
YDR419W	37.3824	0.112424	0.39817	0.282352	0.777674	0.920791
YDR420W	112.234	0.459439	0.282256	1.62774	0.10358	0.376851
YDR421W	38.3217	0.164033	0.394266	0.416045	0.677377	0.875271
YDR422C	89.5229	0.137008	0.32769	0.418104	0.675871	0.875117
YDR423C	80.3826	0.44948	0.320744	1.40136	0.161105	0.477563
YDR424C	167.13	0.0118192	0.282177	0.0418857	0.96659	0.990165
YBL075C	37.0357	-0.133873	0.398365	-0.336055	0.736829	0.902345
YDR425W	35.7357	-0.161167	0.398954	-0.403975	0.686231	0.879999
YDR427W	204.445	-0.744761	0.264619	-2.81447	0.00488582	0.0575124
YDR428C	65.2716	-0.754156	0.347017	-2.17325	0.0297613	0.181894
YDR429C	458.517	0.536394	0.216958	2.47234	0.0134231	0.111866
YDR430C	85.1224	-0.0460639	0.320232	-0.143845	0.885623	0.966837
YDR432W	595.82	0.19196	0.240532	0.798063	0.424834	0.733195
YDR434W	146.464	0.0795705	0.260869	0.305021	0.76035	0.912152
YDR435C	53.1617	-0.714313	0.373007	-1.91501	0.0554914	0.26703
YDR436W	65.6833	-0.282354	0.33106	-0.852877	0.393728	0.717235
YDR437W	12.3284	0.0296022	0.635129	0.0466081	0.962826	0.989011
YDR438W	19.5722	0.213919	0.517215	0.413597	0.679169	0.876576
YDR439W	41.3875	-0.0350095	0.374837	-0.0933993	0.925586	0.978914
YDR440W	69.1674	0.585022	0.347526	1.68339	0.0922996	0.354999
YDR441C	54.3088	-0.0360638	0.372741	-0.0967529	0.922923	0.978639
YDR443C	42.2795	-0.0377526	0.401975	-0.0939179	0.925174	0.978914
YDR444W	78.4489	0.362782	0.300317	1.208	0.227049	0.556752
YDR447C	670.875	-0.238065	0.215535	-1.10453	0.269365	0.604831
YDR448W	53.8698	0.0834449	0.359613	0.232041	0.816506	0.937589
YAL056W	123.654	0.190471	0.2687	0.708859	0.478412	0.768689
YDR449C	53.327	0.758564	0.355646	2.13292	0.0329312	0.195134
YDR450W	2049.52	-0.181318	0.201273	-0.900857	0.367665	0.691842
YDR451C	135.521	0.261773	0.265	0.987823	0.323239	0.655468
YDR452W	259.525	0.339137	0.254806	1.33096	0.183203	0.504624
YDR453C	29.3132	-1.35792	1.01379	-1.33945	0.180426	0.503105
YDR454C	280.261	-0.106632	0.256105	-0.41636	0.677147	0.875271
YDR456W	104.051	0.0753724	0.284936	0.264524	0.791377	0.928016
YDR457W	224.488	-0.053336	0.24862	-0.214528	0.830135	0.941753
YDR458C	96.6112	0.431369	0.29208	1.47689	0.139706	0.438932
YDR459C	33.2701	0.0558864	0.431466	0.129527	0.896941	0.967177
YBL072C	3522.64	-0.18262	0.204032	-0.895057	0.370757	0.695169
YDR460W	68.495	0.109999	0.339963	0.323561	0.74627	0.90504
YDR461W	216.263	-1.60983	0.290173	-5.54782	2.89246e-08	1.72561e-06
YDR461C-A	43.1233	0.0832537	0.377512	0.220532	0.825456	0.939741
YDR462W	120.808	0.0254145	0.272988	0.0930973	0.925826	0.97897
YDR463W	203.392	0.356449	0.254967	1.39802	0.162107	0.477748
YDR464W	103.762	0.630271	0.292799	2.15257	0.0313525	0.1879
YDR465C	243.88	0.691667	0.257266	2.68853	0.0071767	0.0755064
YDR466W	118.85	0.179189	0.277931	0.644725	0.519106	0.793624
[truncated: 4,834 more rows]

[truncated: 3 more sheets: DGY1744, DGY1747, DGY1751]
