# Supplementary material for: Copy number variation alters local and global mutational tolerance
Source: HighWire-hosted journal article supplement (doi:10.1101/gr.277625.122), 2023-08-01
Supplement: Supplemental_Tables.zip [file Supplemental_Table_S27.xlsx]

## Sheet: Sheet1
#Table of FET analysis of DESeq2 results of CNV expression rates for both Observed and Expected values. Observed data is the evolved strain compared to the ancestor with no copy number correction and we find significantly higher expression in CNV associated genes in each strain, compared to the ancestor, consistent with gene amplification models. Expected data is expression in the CNV strain comp…
Evo_Strain	DGY1728	DGY1734	DGY1736	DGY1740	DGY1744	DGY1747	DGY1751	DGY1728	DGY1734	DGY1736	DGY1740	DGY1744	DGY1747	DGY1751
Run type	Obs	Obs	Obs	Obs	Obs	Obs	Obs	Exp	Exp	Exp	Exp	Exp	Exp	Exp
Number of Genes	5481	5715	5717	5475	5600	5707	5820	5707	5828	5717	5250	4471	5593	5819
Median NonCNV LogFC expression	-0.0312038	-0.0103441	-0.0287821	-0.00702807	-0.0172624	-0.00918142	-0.0170972	0.00976845	0.00720723	-0.0174103	-0.00501856	0.0178685	0.00167277	-0.00849359
Median CNV LogFC expression	0.978646	0.85483	1.66321	1.6352	1.46148	1.70026	1.12413	0.0212937	-0.171708	0.0906561	0.0128501	0.0126978	0.124351	0.0147953
Number Sig Higher in Evo	444	45	276	160	188	284	74	309	18	203	148	100	254	46
Number Sig Lower in Evo	205	20	230	272	117	195	46	162	16	221	273	95	187	40
Number Sig Higher in CNV	161	28	72	13	87	35	29	22	0	5	0	4	5	0
Number Sig Lower in CNV	0	0	0	0	0	0	0	11	0	5	2	4	1	1
Fold-higher Ratio	9.79045	74.2638	26.1966	28.393	45.5209	16.2306	57.0581	1.33	0	1.87434	0	1.87887	2.27194	0
Fold-higher p-value	7.92897e-74	3.65717e-34	5.1927e-59	3.77822e-13	3.33817e-85	3.83679e-25	1.23623e-34	0.202035	1	0.202255	1	0.28341	0.0837894	1
Fold-lower Ratio	0	0	0	0	0	0	0	1.26394	0	1.71814	2.27176	1.9821	0.608295	2.26982
Fold-lower p-value:	1.99979e-05	1	0.121647	1	0.277578	0.410835	1	0.48081	1	0.228144	0.241146	0.157852	1	0.365342
